# Supplementary material for: Distal meta-C–H functionalization of α-substituted cinnamates
Source: Royal Society of Chemistry journal article supplement (doi:10.1039/d2sc06206b), 2023-01-01

## Supplementary Information

### Distal *meta*-C–H functionalization of $\alpha$ -substituted cinnamates

Manickam Bakthadoss,\* Tadiparthi Thirupathi Reddy

*\*Department of Chemistry, Pondicherry University, Pondicherry, 605014, India*

*E-mail: bhakthadoss@yahoo.com*

## CONTENTS

|                                                                                                                  |          |
|------------------------------------------------------------------------------------------------------------------|----------|
| 1. General information.....                                                                                      | S3       |
| 2. Optimization studies of catalysts, ligands, oxidants, and solvents .....                                      | S3-S5    |
| 3. Optimization of directing groups for <i>meta</i> -selective C–H olefination reaction.....                     | S5-S6    |
| 4. General procedure for the preparation of starting materials.....                                              | S6-S7    |
| 5. General experimental procedures for mono- <i>meta</i> -C-H functionalization.....                             | S7-S10   |
| 6. Plausible pathway for mono- <i>meta</i> -C-H olefination and detection of palladium<br>complex <b>I</b> ..... | S11-S12  |
| 7. X-ray crystallographic data of <b>3a</b> , <b>4j</b> and <b>12b</b> .....                                     | S13-S15  |
| 8. Spectroscopic data of the products.....                                                                       | S16-S88  |
| 9. Copies of <sup>1</sup> H and <sup>13</sup> C NMR spectra of the products.....                                 | S89-S256 |

## 1. General information:

Commercial reagents were used without further purification. For all compounds  $^1\text{H}$  NMR (400 MHz,  $\text{CDCl}_3$ ) and  $^{13}\text{C}$  NMR (100 MHz,  $\text{CDCl}_3$ ) spectra were recorded in deuteriochloroform- $d_3$  ( $\text{CDCl}_3$ ) on a Bruker 400 MHz spectrometer using tetramethylsilane (TMS,  $\delta = 0$ ) as an internal standard. Spin multiplicities are reported as singlet (s), broad singlet (bs), doublet (d), triplet (t), quartet (q), quintet (quint) and multiplet (m). Mass spectra were recorded on Agilent 1200 LC/MS-6110 mass spectrometry. Spectral data and copy of  $^1\text{H}$  and  $^{13}\text{C}$  NMR of all compounds **1a-s**, **2a-x**, **3a-x**, **4aa-af**, **5a-f**, **6a-r**, **8a-k**, **10a-v**, **12a-q**, **13a-d**, **14a-f**, **15a-d**, **16**, **17**, and **19** are listed below.

## 2. Optimization details for activation of remote *meta*-C-H bond

### I. Ligand screening:

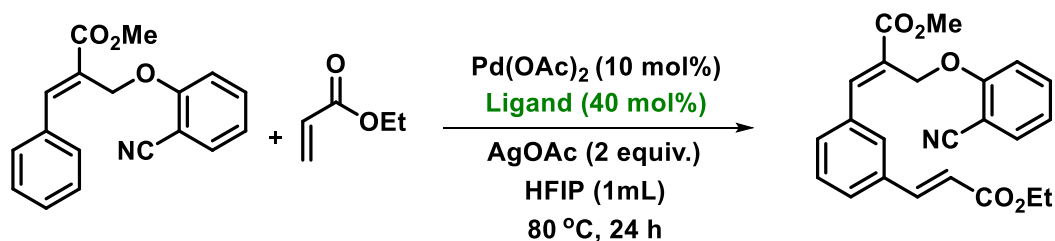

| S.No | Ligand           | Product               |
|------|------------------|-----------------------|
| 1.   | Form-Gly-OH      | 20                    |
| 2.   | Boc-Gly-OH       | 10                    |
| 3.   | Ac-Gly-OH        | 68                    |
| 4.   | <b>Ac-Gly-OH</b> | <b>72<sup>a</sup></b> |
| 5.   | Boc-Val-OH       | -                     |
| 6.   | Ac-Val-OH        | 61                    |
| 7.   | Boc-Ala-OH       | -                     |
| 8.   | Ac-Ala-OH        | 55                    |
| 9.   | Without Ligand   | -                     |
| 10.  | Sarcosine        | -                     |
| 11.  | 2-Picoline       | -                     |

<sup>a</sup> Reaction carried out for 12 h

## II. Catalyst loading:

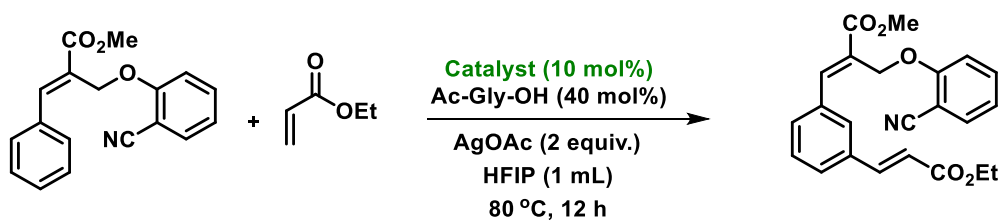

| S. No. | Catalyst (mol %)                             | Product   |
|--------|----------------------------------------------|-----------|
| 1.     | PdCl <sub>2</sub> (10)                       | -         |
| 2.     | Pd(TFA) <sub>2</sub> (10)                    | 30        |
| 3.     | <b>Pd(OAc)<sub>2</sub> (10)</b>              | <b>72</b> |
| 4.     | Cu(OAc) <sub>2</sub> (50)                    | -         |
| 5.     | Co(OAc) <sub>2</sub> (50)                    | -         |
| 6.     | Mn(OAc) <sub>2</sub> .4H <sub>2</sub> O (50) | -         |
| 7.     | Ni(OAc) <sub>2</sub> .4H <sub>2</sub> O (50) | -         |
| 8.     | Rh <sub>2</sub> (OAc) <sub>4</sub> (5)       | -         |

## III. Oxidant screening:

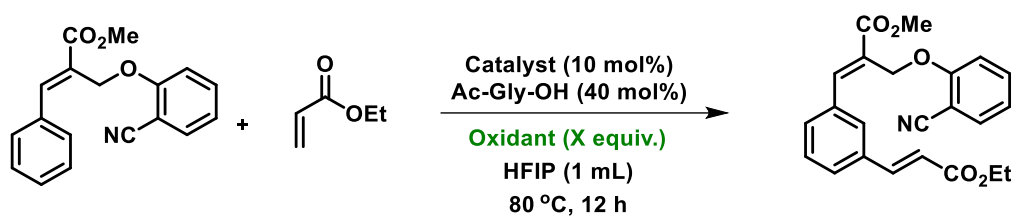

| S. No. | Oxidant (equiv.)                                 | Product   |
|--------|--------------------------------------------------|-----------|
| 1.     | Cu(OAc) <sub>2</sub> (2)                         | 33        |
| 2.     | <b>AgOAc (2)</b>                                 | <b>72</b> |
| 3.     | AgOAc (3)                                        | 70        |
| 4.     | Ag <sub>2</sub> CO <sub>3</sub> (2)              | 54        |
| 5.     | K <sub>2</sub> S <sub>2</sub> O <sub>8</sub> (2) | -         |
| 6.     | Benzoquinone (2)                                 | Trace     |
| 7.     | AgTFA (2)                                        | 35        |
| 8.     | Ag <sub>2</sub> O (2)                            | 18        |
| 9.     | AgNO <sub>3</sub> (2)                            | 20        |
| 10.    | O <sub>2</sub> (balloon)                         | 23        |

#### IV. Solvent screening:

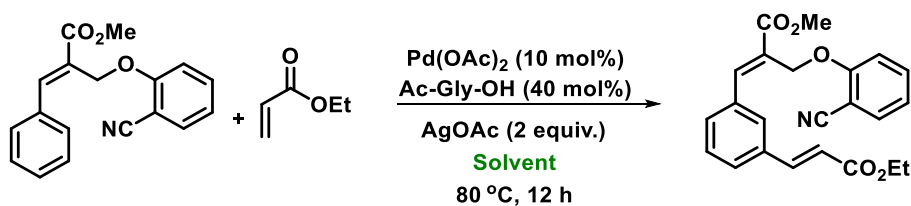

| S. No. | Solvent                              | Product   |
|--------|--------------------------------------|-----------|
| 1.     | AcOH                                 | Trace     |
| 2.     | <b>HFIP</b>                          | <b>72</b> |
| 3.     | DCE:HFIP(4:1)                        | 20        |
| 4.     | TFE:HFIP(4:1)                        | 50        |
| 5.     | TFT:HFIP(4:1)                        | 34        |
| 6.     | t-AmOH                               | Trace     |
| 7.     | t-BuOH                               | -         |
| 8.     | HFIP:TFE:H <sub>2</sub> O(1:1:1)     | -         |
| 9.     | HFIP:Dioxane:H <sub>2</sub> O(1:1:1) | -         |
| 10.    | Ethylene Glycol                      | -         |
| 11.    | TBHP                                 | -         |
| 12.    | HFIP:H <sub>2</sub> O (4:1)          | 20        |
| 13.    | HFIP:AcOH(4:1)                       | 22        |
| 14.    | TfOH                                 | -         |
| 15.    | Trifluro ethanol (TFE)               | 37        |
| 16.    | Trifluro acetic acid (TFA)           | 21        |

#### 3. Optimization of directing groups for *meta*-selective C–H olefination reaction

We initiated our attempts towards remote mono-*meta*-C–H olefination by investigating the potential of various directing group (DG) based scaffolds. To accomplish this, we synthesized the corresponding compound from the Baylis-Hillman bromo substrate and attached with various DGs, then we subjected them to the *meta*-C–H bond olefination reaction with methyl acrylate. The absence of DG on the scaffold **S**, we did not observe the coupled product. Further, the scaffolds **S2-4** containing -NO<sub>2</sub>, -CHO and -COCH<sub>3</sub> as directing groups also failed to produce the desired coupled products. The olefinated product was successfully obtained in a 70% yield with high *meta*-selectivity (*m*:others, 96:4) when we subjected the scaffold **S5** with -CN as a directing group.

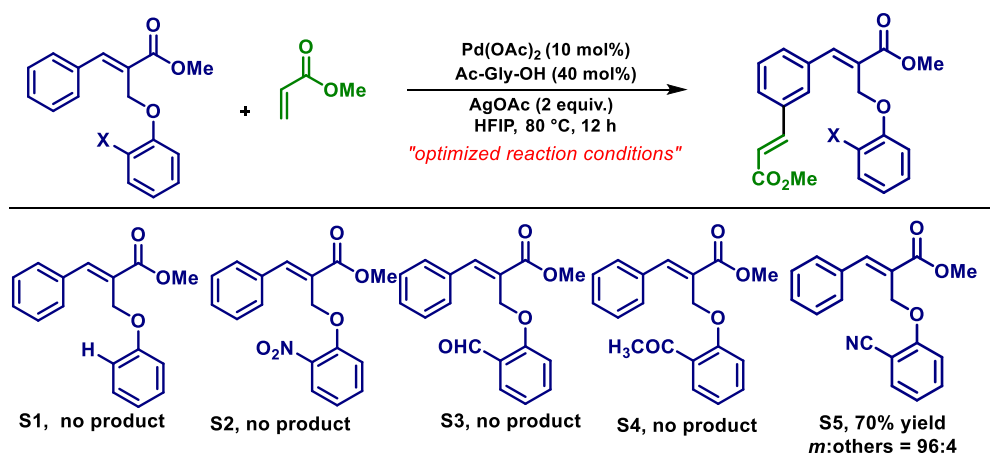

#### 4. General procedure for the preparation of starting materials

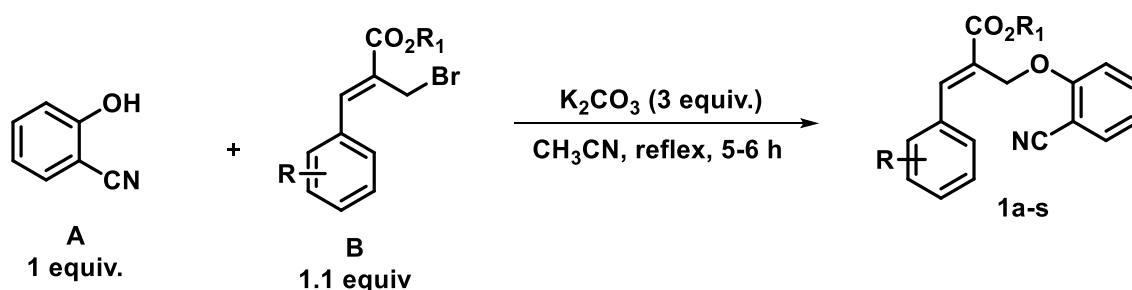

To a stirred solution of Baylis-Hillman bromo compound<sup>1</sup> (B, 1.1 equiv.) in acetonitrile (10 mL) in a round bottom flask was added 2-hydroxybenzonitrile (A, 3 mmol, 1 equiv.) and  $\text{K}_2\text{CO}_3$  (3 equiv.). The reaction solution was reflux for 5 to 6 hours. After the completion of the reaction as indicated by the TLC, the acetonitrile (10 mL) was evaporated under reduced pressure. The reaction mixture was diluted with water (15 mL) and extracted with EtOAc (3 × 15 mL). The combined organic layer was dried over  $\text{Na}_2\text{SO}_4$ . The solvent was evaporated under reduced pressure and the crude solid thus obtained was crystallized (15% ethyl acetate/hexane) to provide **1a-s** as a white solid. All the starting materials are new and fully characterized using  $^1\text{H}$  &  $^{13}\text{C}$  NMR spectroscopy and mass spectrometry.

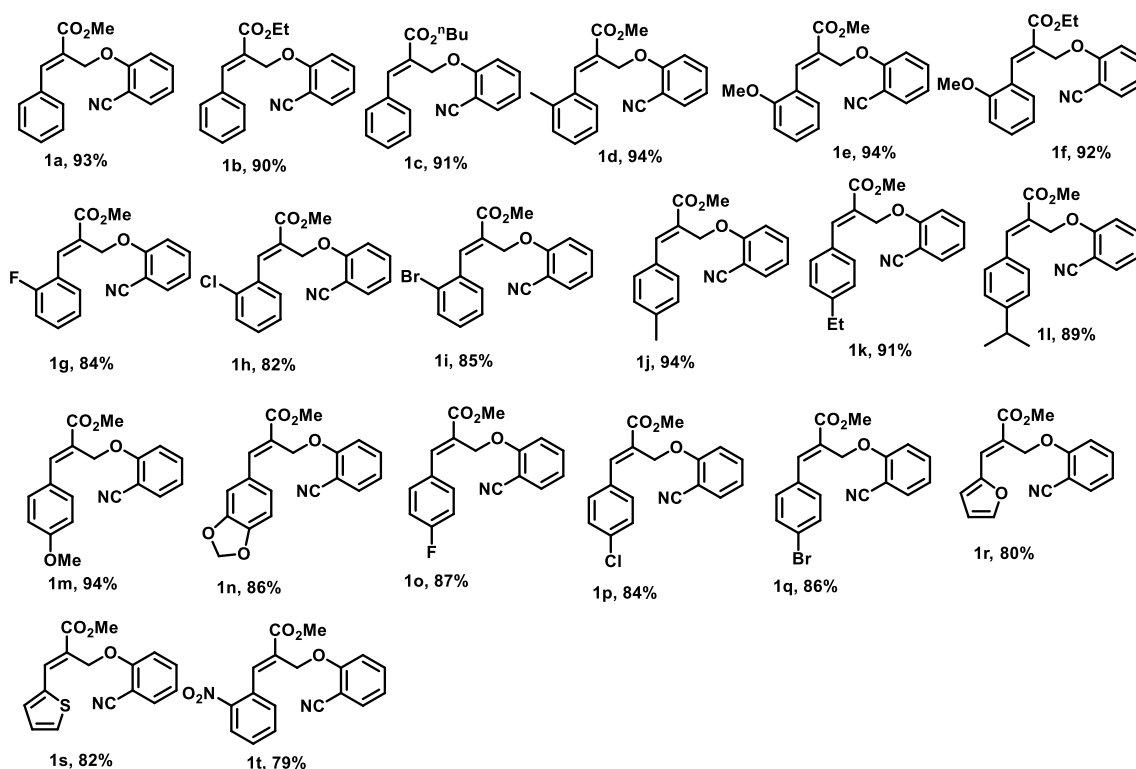

1. a) D. Basavaiah, G. Veeraraghavaiah *Chem. Soc. Rev.* **2012**, *41*, 68; b) D. Basavaiah, B. S. Reddy, S. S. Badsara *Chem. Rev.* **2010**, *110*, 5447; c) D. Basavaiah, M. Bakthadoss, S. Pandiaraju *Chem. Commun.* **1998**, 1639.

## 5. General experimental procedures

### a) General procedure for the *meta*-C–H olefination of cinnamates

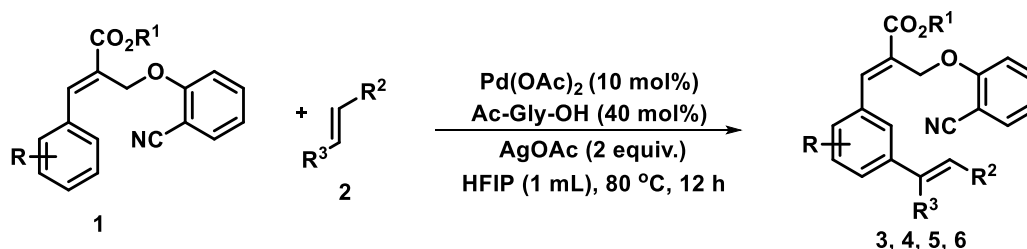

A clean, oven-dried reaction tube was charged with a magnetic stir-bar, Pd(OAc)<sub>2</sub> (10 mol%), Ac-Gly-OH (40 mol%), AgOAc (2 equiv.) and  $\alpha$ -substituted cinnamate **1** (0.2 mmol, 1 equiv.) in 1,1,1,3,3,3-Hexafluoro-2-propanol (HFIP, 1 mL). The alkene **2** (2 equiv.) was then added. The reaction mixture was stirred vigorously in a preheated oil bath at 80 °C for 12 h. After the completion, the reaction mixture was diluted with EtOAc and filtered through a celite pad. After the filtration, the solvent was evaporated and the crude mixture thus obtained was purified by column chromatography (ethyl acetate/hexane) using silica gel (100-200 mesh size) to afford the *meta*-coupled product (**3**, **4**, **5** and **6**).

**b) General procedure for the *meta*-C–H olefination of cinnamates with naphthoquinone**

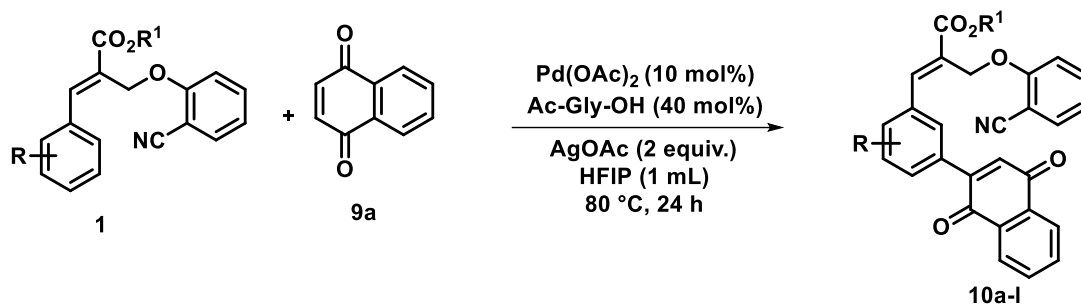

A clean, oven-dried reaction tube was charged with a magnetic stir-bar,  $\text{Pd}(\text{OAc})_2$  (10 mol%), Ac-Gly-OH (40 mol%), AgOAc (2 equiv.) and  $\alpha$ -substituted cinnamate **1** (0.2 mmol, 1 equiv.) in 1,1,1,3,3,3-Hexafluoro-2-propanol (HFIP, 1 mL). The naphthoquinone **9a** (2 equiv.) was then added. The reaction mixture was stirred vigorously in a preheated oil bath at 80 °C for 24 h. After the completion, the reaction mixture was diluted with EtOAc and filtered through a celite pad. After the filtration, the solvent was evaporated and the crude mixture thus obtained was purified by column chromatography (ethyl acetate/hexane) using silica gel (100-200 mesh size) to afford the *meta*-coupled product (**10a-l**).

**c) General procedure for the *meta*-C–H olefination of cinnamates with benzoquinones**

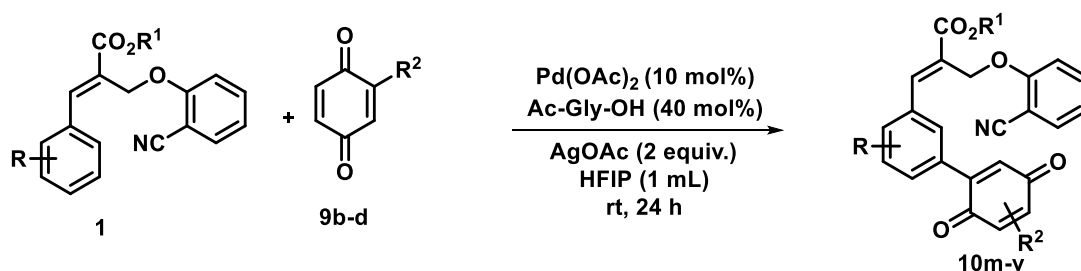

A clean, oven-dried reaction tube was charged with a magnetic stir-bar,  $\text{Pd}(\text{OAc})_2$  (10 mol%), Ac-Gly-OH (40 mol%), AgOAc (2 equiv.) and  $\alpha$ -substituted cinnamate **1** (0.2 mmol, 1 equiv.) in 1,1,1,3,3,3-Hexafluoro-2-propanol (HFIP, 1 mL). The benzoquinone (**9b-d**) (2 equiv.) was then added. The reaction mixture was stirred vigorously at room temperature for 24 h. After the completion, the reaction mixture was diluted with EtOAc and filtered through a celite pad. After the filtration, the solvent was evaporated and the crude mixture thus obtained was purified by column chromatography (ethyl acetate/hexane) using silica gel (100-200 mesh size) to afford the *meta*-coupled product (**10m-v**).



**d) General procedure for the *meta*-C–H olefination of cinnamates with maleimides**

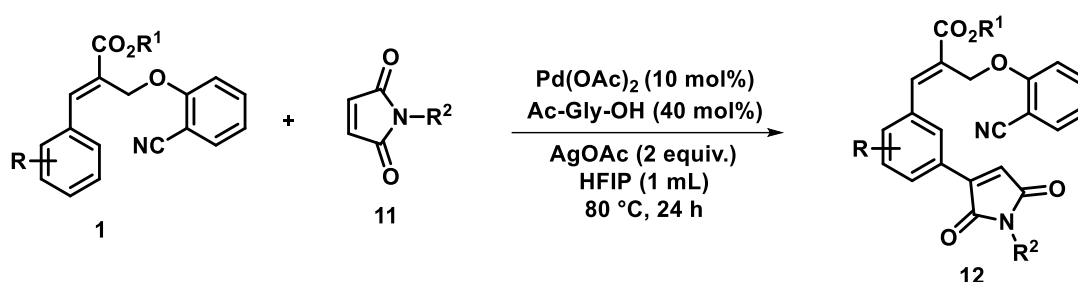

A clean, oven-dried reaction tube was charged with a magnetic stir-bar, Pd(OAc)<sub>2</sub> (10 mol%), Ac-Gly-OH (40 mol%), AgOAc (2 equiv.) and  $\alpha$ -substituted cinnamate **1** (0.2 mmol, 1 equiv.) in 1,1,1,3,3,3-Hexafluoro-2-propanol (HFIP, 1 mL). The maleimide **11** (2 equiv.) was then added. The reaction mixture was stirred vigorously in a preheated oil bath at 80 °C for 24 h. After the completion, the reaction mixture was diluted with EtOAc and filtered through a celite pad. After the filtration, the solvent was evaporated and the crude mixture thus obtained was purified by column chromatography (ethyl acetate/hexane) using silica gel (100-200 mesh size) to afford the *meta*-coupled product (**12**).

**e) General procedure for the *meta*-C–H olefination of cinnamates with sulfolene**

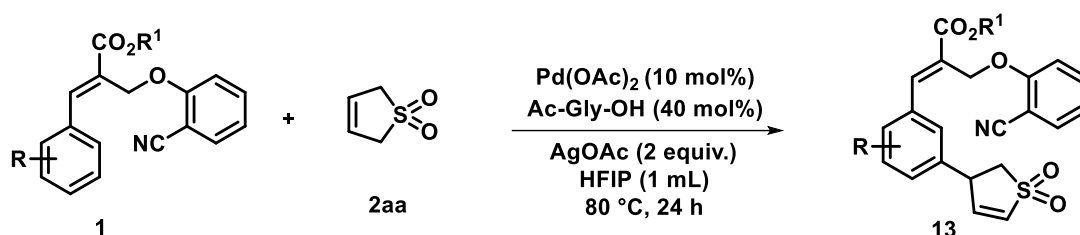

A clean, oven-dried reaction tube was charged with a magnetic stir-bar, Pd(OAc)<sub>2</sub> (10 mol%), Ac-Gly-OH (40 mol%), AgOAc (2 equiv.) and  $\alpha$ -substituted cinnamate **1** (0.2 mmol, 1 equiv.) in 1,1,1,3,3,3-Hexafluoro-2-propanol (HFIP, 1 mL). The sulfolene **2aa** (2 equiv.) was then added. The reaction mixture was stirred vigorously in a preheated oil bath at 80 °C for 24 h. After the completion, the reaction mixture was diluted with EtOAc and filtered through a celite pad. After the filtration, the solvent was evaporated and the crude mixture thus obtained was purified by column chromatography (ethyl acetate/hexane) using silica gel (100-200 mesh size) to afford the *meta*-coupled product (**13**).

f) General procedure for the *meta*-C–H acetoxylation of cinnamates

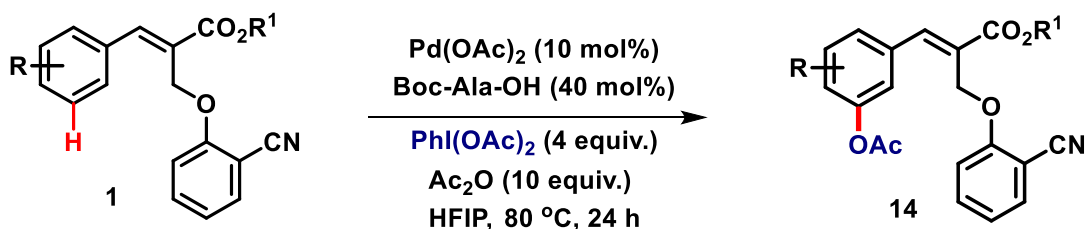

An clean oven-dried reaction tube was charged with a magnetic stir-bar, Pd(OAc)<sub>2</sub> (10 mol%), Boc-Ala-OH (40 mol%), PhI(OAc)<sub>2</sub> (4 equiv.), Ac<sub>2</sub>O (10 equiv.) and  $\alpha$ -substituted cinnamate **1** (0.2 mmol, 1 equiv.) in 1 mL of 1,1,1,3,3,3-Hexafluoro-2-propanol (HFIP). The reaction mixture was stirred vigorously in a preheated oil bath at 80 °C for 24 h. After the completion, the reaction mixture was diluted with EtOAc and filtered through a celite pad. After the filtration, the solvent was evaporated and the crude mixture thus obtained was purified by column chromatography (ethyl acetate/hexane) using silica gel (100-200 mesh size) to afford the *meta*-coupled product (**14**).

g) General procedure for *meta*-C–H cyanation of cinnamates

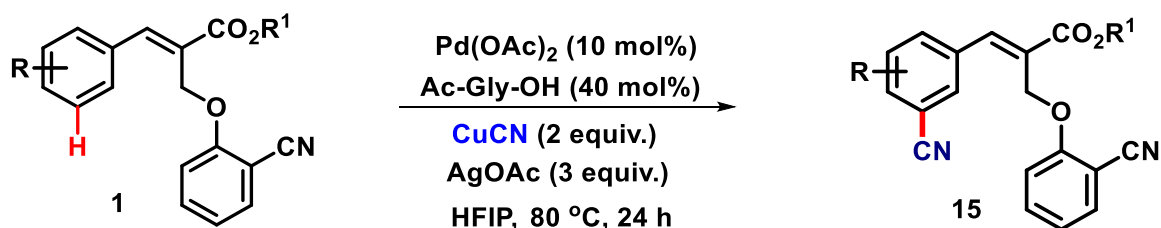

An clean oven-dried reaction tube was charged with magnetic stir-bar, Pd(OAc)<sub>2</sub> (10 mol%), Ac-Gly-OH (40 mol%), AgOAc (3 equiv.), CuCN (2 equiv.) and  $\alpha$ -substituted cinnamate **1** (0.2 mmol, 1 equiv.) in 1 mL of 1,1,1,3,3,3-Hexafluoro-2-propanol (HFIP). The reaction mixture was stirred vigorously in a preheated oil bath at 80 °C for 24 h. After the completion, the reaction mixture was diluted with EtOAc and filtered through a celite pad. After the filtration, the solvent was evaporated and the crude mixture thus obtained was purified by column chromatography (ethyl acetate/hexane) using silica gel (100-200 mesh size) to afford the *meta*-coupled product (**15**).

## 6. Plausible pathway for mono-*meta*-C-H olefination

A proposed mechanism is based on the previous reports. The linear nitrile directing group present in the substrate **1** coordinates with palladium(II) complex and forms a 12 membered palladacycle **A** via C-H activation upon the elimination of acetic acid. The palladacycle **A** was confirmed through mass spectrometry and it undergoes olefine coordination with an alkene coupling partner leading to a complex **B** which then undergoes 1,2-migratory insertion to form intermediate **C**. The intermediate **C** undergoes  $\beta$ -hydride elimination which produces the product **3** and complex **D**. The complex **D** undergoes reductive elimination to form Pd<sup>0</sup> species **E**. Finally, the Pd<sup>0</sup> species is reoxidised to Pd<sup>II</sup> species using AgOAc thereby restarting the catalytic cycle

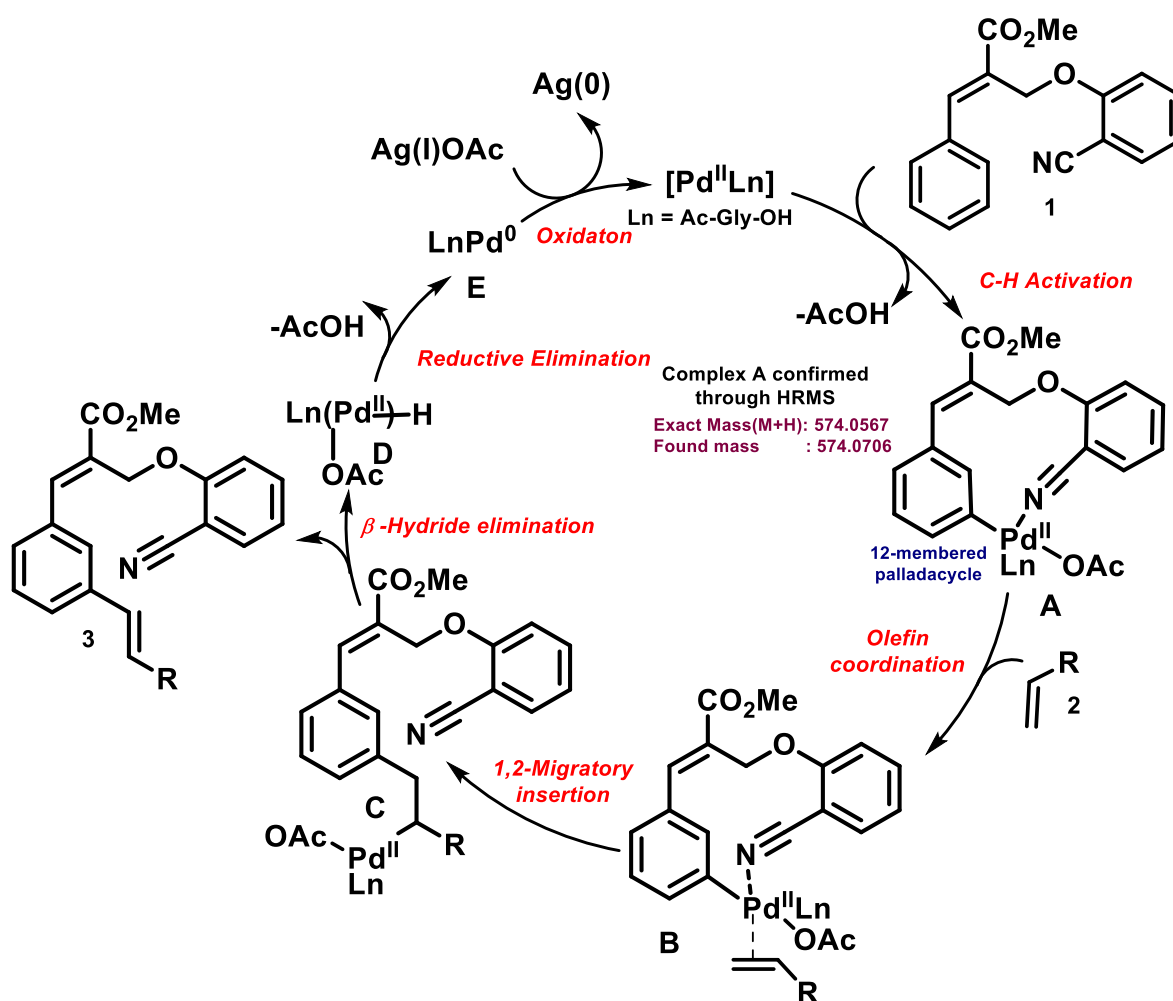

## Detection of palladium complex I through mass spectrometry

|               |             |             |                      |                 |                 |                        |                       |
|---------------|-------------|-------------|----------------------|-----------------|-----------------|------------------------|-----------------------|
| Sample Name   | TTR-M-9h    | Position    |                      | Instrument Name | Q-TOF           | User Name              | QTOF-PU\admin         |
| Inj Vol       | -1          | InjPosition |                      | SampleType      | Sample          | IRM Calibration Status | Success               |
| Data Filename | TTR-M-9h1.d | ACQ Method  | Pondicherry Universi | Comment         | TTR-MB-681.9459 | Acquired Time          | 2/13/2019 11:52:38 AM |

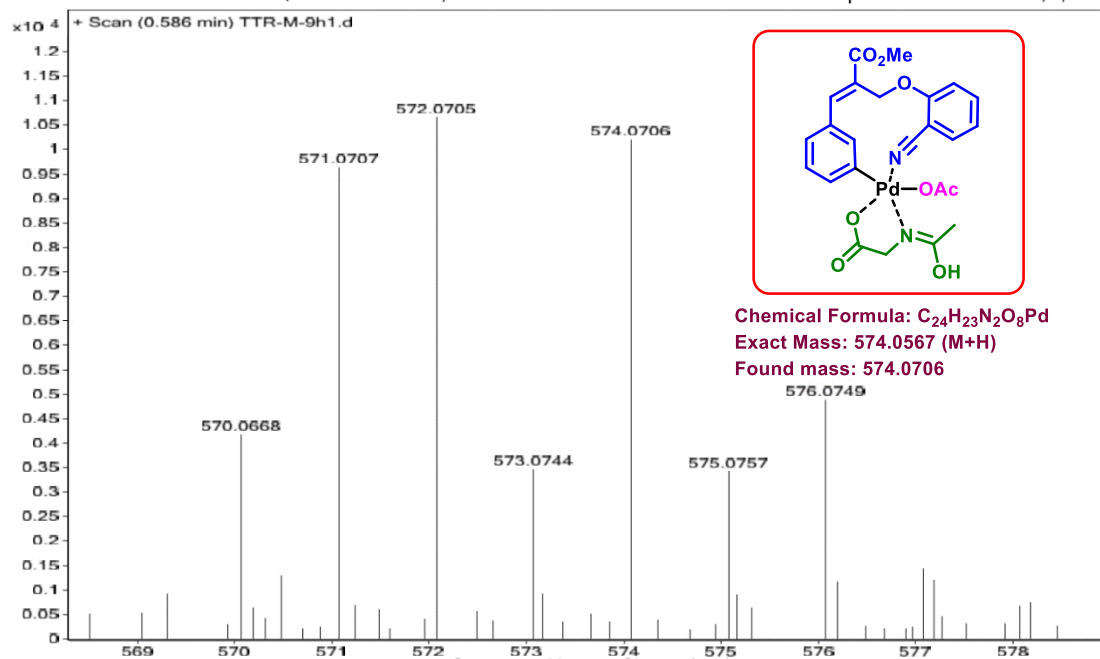

## 7. X-ray crystallographic data of 3a, 4j and 12b

### Methyl (*E*)-2-((2-cyanophenoxy)methyl)-3-(3-((*E*)-3-ethoxy-3-oxoprop-1-en-1-yl)phenyl)acrylate (3a)

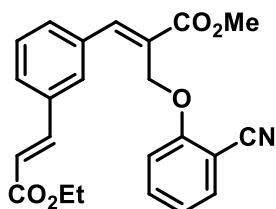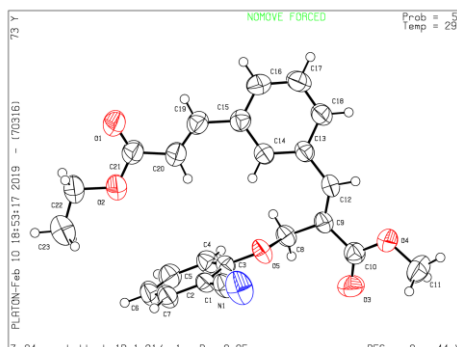

#### Crystal data and structure refinement for 3a

|                                             |                                                   |
|---------------------------------------------|---------------------------------------------------|
| Identification code                         | TTR-B-19                                          |
| Empirical formula                           | C <sub>23</sub> H <sub>21</sub> NO <sub>5</sub>   |
| Formula weight                              | 391.42                                            |
| Temperature/K                               | 295(2)                                            |
| Crystal system                              | monoclinic                                        |
| Space group                                 | P2 <sub>1</sub> /n                                |
| a/Å                                         | 7.7248(8)                                         |
| b/Å                                         | 23.0566(19)                                       |
| c/Å                                         | 12.1391(13)                                       |
| α/°                                         | 90.00                                             |
| β/°                                         | 103.515(9)                                        |
| γ/°                                         | 90.00                                             |
| Volume/Å <sup>3</sup>                       | 2102.2(4)                                         |
| Z                                           | 7                                                 |
| ρ <sub>calc</sub> /mg/mm <sup>3</sup>       | 1.217                                             |
| μ/mm <sup>-1</sup>                          | 0.096                                             |
| F(000)                                      | 798.0                                             |
| Crystal size/mm <sup>3</sup>                | 0.55 × 0.38 × 0.2                                 |
| 2θ range for data collection                | 7.06 to 58.36°                                    |
| Index ranges                                | -10 ≤ h ≤ 8, -28 ≤ k ≤ 28, -12 ≤ l ≤ 16           |
| Reflections collected                       | 15136                                             |
| Independent reflections                     | 4947[R(int) = 0.0283]                             |
| Data/restraints/parameters                  | 4947/0/264                                        |
| Goodness-of-fit on F <sup>2</sup>           | 1.028                                             |
| Final R indexes [I ≥ 2σ (I)]                | R <sub>1</sub> = 0.0501, wR <sub>2</sub> = 0.1153 |
| Final R indexes [all data]                  | R <sub>1</sub> = 0.0884, wR <sub>2</sub> = 0.1362 |
| Largest diff. peak/hole / e Å <sup>-3</sup> | 0.18/-0.15                                        |

**Methyl (E)-2-((2-cyanophenoxy)methyl)-3-(2-methyl-5-((E)-2 (phenylsulfonyl)vinyl)phenyl)acrylate (4j)**

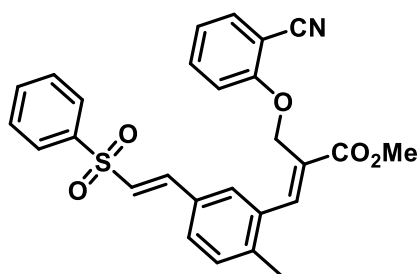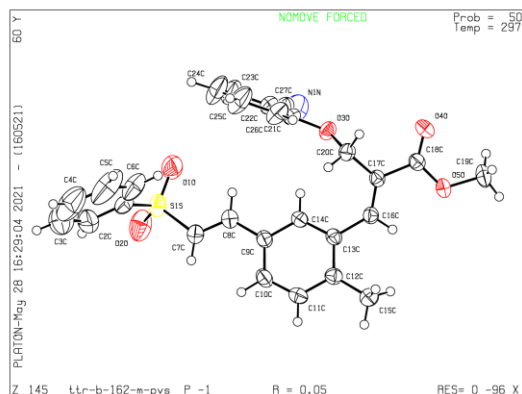

**Crystal data and structure refinement for 4j**

|                                             |                                                               |
|---------------------------------------------|---------------------------------------------------------------|
| Identification code                         | TTR-B-162-M-PVS                                               |
| Empirical formula                           | C <sub>27</sub> H <sub>23</sub> NO <sub>5</sub> S             |
| Formula weight                              | 473.13                                                        |
| Temperature/K                               | 297.00                                                        |
| Crystal system                              | triclinic                                                     |
| Space group                                 | P-1                                                           |
| a/Å                                         | 8.2408(5)                                                     |
| b/Å                                         | 10.2565(5)                                                    |
| c/Å                                         | 15.3407(7)                                                    |
| α/°                                         | 88.527(4)                                                     |
| β/°                                         | 77.996(4)                                                     |
| γ/°                                         | 72.445(5)                                                     |
| Volume/Å <sup>3</sup>                       | 1208.25(10)                                                   |
| Z                                           | 2                                                             |
| ρ <sub>calc</sub> /cm <sup>3</sup>          | 1.302                                                         |
| μ/mm <sup>-1</sup>                          | 0.172                                                         |
| F(000)                                      | 496.0                                                         |
| Crystal size/mm <sup>3</sup>                | 0.64 × 0.58 × 0.36                                            |
| Radiation                                   | MoKα (λ = 0.71073)                                            |
| 2θ range for data collection/°              | 8.16 to 58.12                                                 |
| Index ranges                                | -10 ≤ h ≤ 9, -13 ≤ k ≤ 12, -19 ≤ l ≤ 20                       |
| Reflections collected                       | 13468                                                         |
| Independent reflections                     | 5569 [R <sub>int</sub> = 0.0307, R <sub>sigma</sub> = 0.0414] |
| Data/restraints/parameters                  | 5569/0/309                                                    |
| Goodness-of-fit on F <sup>2</sup>           | 1.073                                                         |
| Final R indexes [I >= 2σ (I)]               | R <sub>1</sub> = 0.0492, wR <sub>2</sub> = 0.1219             |
| Final R indexes [all data]                  | R <sub>1</sub> = 0.0765, wR <sub>2</sub> = 0.1351             |
| Largest diff. peak/hole / e Å <sup>-3</sup> | 0.23/-0.35                                                    |

**Methyl (*E*)-2-((2-cyanophenoxy)methyl)-3-(3-(1-ethyl-2,5-dioxo-2,5-dihydro-1H-pyrrol-3-yl)phenyl)acrylate (12b)**

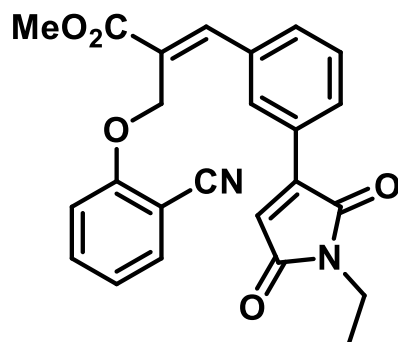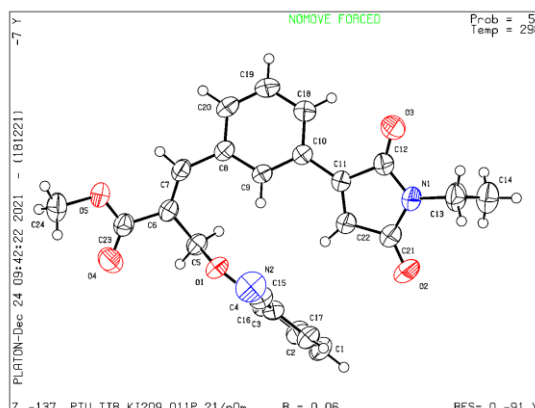

**Crystal data and structure refinement for 12b**

|                                             |                                                                                                     |
|---------------------------------------------|-----------------------------------------------------------------------------------------------------|
| Empirical formula                           | C <sub>24</sub> H <sub>20</sub> N <sub>2</sub> O <sub>5</sub>                                       |
| Formula weight                              | 416.1372                                                                                            |
| Temperature/K                               | 298(2)                                                                                              |
| Crystal system                              | monoclinic                                                                                          |
| Space group                                 | P2 <sub>1</sub> /n                                                                                  |
| a/Å                                         | 10.811(3)                                                                                           |
| b/Å                                         | 8.0573(19)                                                                                          |
| c/Å                                         | 24.254(5)                                                                                           |
| α/°                                         | 90.00                                                                                               |
| β/°                                         | 92.718(7)                                                                                           |
| γ/°                                         | 90.00                                                                                               |
| Volume/Å <sup>3</sup>                       | 2110.3(8)                                                                                           |
| Z                                           | 4                                                                                                   |
| ρ <sub>calc</sub> /mg/mm <sup>3</sup>       | 1.217                                                                                               |
| μ/mm <sup>-1</sup>                          | 0.096                                                                                               |
| F(000)                                      | 798.0                                                                                               |
| Crystal size/mm <sup>3</sup>                | 0.55 × 0.38 × 0.2                                                                                   |
| 2θ range for data collection                | 2.03 to 30.10°                                                                                      |
| Index ranges                                | -15 ≤ h ≤ 14, 11 ≤ k ≤ 11, -34 ≤ l ≤ 33                                                             |
| Reflections collected                       | 32482                                                                                               |
| Independent reflections                     | 6135 [R(int) = 0.0391]                                                                              |
| Data/restraints/parameters                  | 6135 / 0 / 282                                                                                      |
| Goodness-of-fit on F <sup>2</sup>           | 1.028                                                                                               |
| Final R indexes [I ≥ 2σ (I)]                | 3956 data; R <sub>1</sub> = 0.0563, wR <sub>2</sub> = 0.1282                                        |
| Final R indexes [all data]                  | R <sub>1</sub> = 0.0884, wR <sub>2</sub> = 0.1362 R <sub>0</sub> = 0.0962, wR <sub>2</sub> = 0.1554 |
| Largest diff. peak/hole / e Å <sup>-3</sup> | 0.303/ -0.301                                                                                       |

## 8. Spectroscopic data of the products

### Methyl (*E*)-2-((2-cyanophenoxy) methyl)-3-phenylacrylate (**1a**)

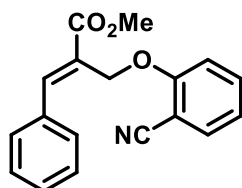

White solid, Yield (93%), M.P (110 °C),  $^1\text{H}$  NMR (400 MHz,  $\text{CDCl}_3$ )  $\delta$  8.10 (s, 1H), 7.67 – 7.46 (m, 4H), 7.46 – 7.33 (m, 3H), 7.12 – 6.95 (m, 2H), 4.96 (s, 2H), 3.87 (s, 3H).  $^{13}\text{C}$  NMR (100 MHz,  $\text{CDCl}_3$ )  $\delta$  167.45, 160.38, 146.81, 134.42, 134.32, 134.01, 129.93, 129.79, 128.93, 126.34, 121.44, 116.46, 113.51, 102.85, 64.21, 52.56. HRMS (ESI): calc. for  $[(\text{C}_{18}\text{H}_{15}\text{NO}_3)]$  (M+H) 294.1132, measured 294.1136

### Ethyl (*E*)-2-((2-cyanophenoxy) methyl)-3-phenylacrylate (**1b**)

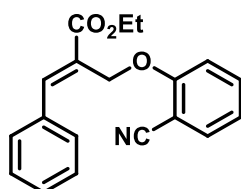

White solid, Yield (90%), M.P (102 °C),  $^1\text{H}$  NMR (400 MHz,  $\text{CDCl}_3$ )  $\delta$  8.09 (s, 1H), 7.58 (d,  $J = 7.7$  Hz, 1H), 7.52 (dd,  $J = 9.4, 4.3$  Hz, 3H), 7.41 (dd,  $J = 8.2, 2.3$  Hz, 3H), 7.11 – 7.00 (m, 2H), 4.97 (s, 2H), 4.32 (q,  $J = 7.1$  Hz, 2H), 1.35 (t,  $J = 7.1$  Hz, 3H).  $^{13}\text{C}$  NMR (100 MHz,  $\text{CDCl}_3$ )  $\delta$  166.98, 160.46, 146.45, 134.41, 134.00, 129.85, 129.79, 128.92, 126.69, 121.40, 116.49, 113.56, 102.84, 64.25, 61.54, 14.39. HRMS (ESI): calc. for  $[(\text{C}_{19}\text{H}_{17}\text{NO}_3)]$  (M+H) 308.1189, measured 308.1287

### Butyl (*E*)-2-((2-cyanophenoxy) methyl)-3-phenyl acrylate (**1c**)

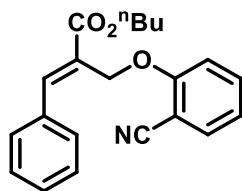

White solid, Yield (91%), M.P ( 97 °C),  $^1\text{H}$  NMR (400 MHz,  $\text{CDCl}_3$ )  $\delta$  8.09 (s, 1H), 7.58 (dd,  $J = 7.7, 1.6$  Hz, 1H), 7.55 – 7.48 (m, 3H), 7.45 – 7.37 (m, 3H), 7.05 (ddd,  $J = 10.8, 8.4, 4.6$  Hz, 2H), 4.96 (s, 2H), 4.26 (t,  $J = 6.6$  Hz, 2H), 1.69 (dd,  $J = 14.8, 6.9$  Hz, 2H), 1.54 – 1.30 (m, 2H), 0.94 (t,  $J = 7.4$  Hz, 3H).  $^{13}\text{C}$  NMR (100 MHz,  $\text{CDCl}_3$ )  $\delta$  167.01, 160.40, 146.45, 134.40, 134.36, 133.98, 129.83, 129.77, 128.89, 126.63, 121.35, 116.45, 113.41, 102.73,



65.38, 64.20, 30.76, 19.31, 13.84. HRMS (ESI): calc. for [(C<sub>21</sub>H<sub>21</sub>NO<sub>3</sub>)] (M+Na) 358.1419, measured 358.1419.

**Methyl (*E*)-2-((2-cyanophenoxy) methyl)-3-(*o*-tolyl) acrylate (1d)**

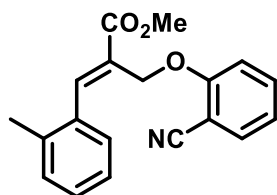

White solid, Yield (94%), M.P (92 °C), <sup>1</sup>H NMR (400 MHz, CDCl<sub>3</sub>) δ 8.16 (s, 1H), 7.55 (d, *J* = 7.5 Hz, 1H), 7.50 – 7.38 (m, 2H), 7.31 – 7.16 (m, 4H), 7.03 – 6.92 (m, 2H), 4.86 (s, 2H), 3.88 (s, 3H), 2.32 (s, 3H). <sup>13</sup>C NMR (100 MHz, CDCl<sub>3</sub>) δ 167.15, 160.35, 145.61, 137.21, 134.29, 133.90, 133.59, 130.26, 129.65, 129.18, 127.19, 126.23, 121.29, 116.41, 113.33, 102.71, 64.30, 52.49, 20.07. HRMS (ESI): calc. for [(C<sub>19</sub>H<sub>18</sub>NO<sub>3</sub>)] (M+H) 308.1287, measured 308.1289.

**Methyl (*E*)-2-((2-cyanophenoxy) methyl)-3-(2-methoxyphenyl) acrylate (1e)**

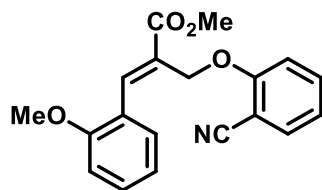

White solid, Yield (96%), M.P (112 °C), <sup>1</sup>H NMR (400 MHz, CDCl<sub>3</sub>) δ 8.26 (s, 1H), 7.60 – 7.46 (m, 3H), 7.37 (t, *J* = 7.7 Hz, 1H), 7.03 (dd, *J* = 17.2, 8.3 Hz, 2H), 6.94 (dd, *J* = 18.6, 7.9 Hz, 2H), 4.92 (s, 2H), 3.86 (d, *J* = 2.5 Hz, 6H). <sup>13</sup>C NMR (100 MHz, CDCl<sub>3</sub>) δ 167.44, 160.49, 157.92, 142.77, 134.37, 133.93, 131.55, 130.63, 126.11, 123.46, 121.29, 120.88, 116.52, 113.50, 110.61, 102.74, 64.77, 55.65, 52.42. HRMS (ESI): calc. for [(C<sub>19</sub>H<sub>17</sub>NO<sub>4</sub>)] (M+Na) 346.1055, measured 346.1053.

**Methyl (*E*)-2-((2-cyanophenoxy)methyl)-3-(2-fluorophenyl)acrylate (1f)**

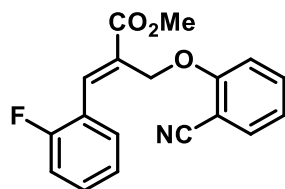

White solid, Yield (84%), M.P (102 °C), <sup>1</sup>H NMR (400 MHz, CDCl<sub>3</sub>) δ 8.13 (s, 1H), 7.63 – 7.48 (m, 3H), 7.40 (dd, *J* = 10.5, 4.6 Hz, 1H), 7.21 – 7.00 (m, 4H), 4.94 (s, 2H), 3.88 (s, 3H). <sup>13</sup>C NMR (100 MHz, CDCl<sub>3</sub>) δ 167.55, 160.64, 150.24, 146.15, 134.35, 133.83, 131.42, 121.44, 121.07, 118.76, 116.44, 113.38, 112.76, 102.58, 64.00, 52.47. HRMS (ESI): calc. for [(C<sub>18</sub>H<sub>14</sub>FNO<sub>3</sub>)] (M+H) 312.1036, measured 312.1016.

**Methyl (*E*)-3-(2-chlorophenyl)-2-((2-cyanophenoxy) methyl) acrylate (1g)**

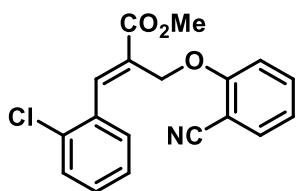

White solid, Yield (82%), M.P (104 °C), <sup>1</sup>H NMR (400 MHz, CDCl<sub>3</sub>) δ 8.18 (s, 1H), 7.63 – 7.40 (m, 4H), 7.29 (dd, *J* = 17.1, 9.2 Hz, 2H), 7.03 (dd, *J* = 7.7, 5.5 Hz, 2H), 4.86 (s, 2H), 3.88 (s, 3H). <sup>13</sup>C NMR (100 MHz, CDCl<sub>3</sub>) δ 166.84, 160.25, 143.44, 134.44, 134.34, 133.93, 132.94, 130.93, 129.72, 128.18, 127.26, 121.55, 116.41, 113.55, 102.78, 64.42, 52.68. HRMS (ESI): calc. for [(C<sub>18</sub>H<sub>14</sub>ClNO<sub>3</sub>)] (M+H) 328.0740, measured 328.0741.

**Methyl (*E*)-3-(2-bromophenyl)-2-((2-cyanophenoxy)methyl)acrylate (1h)**

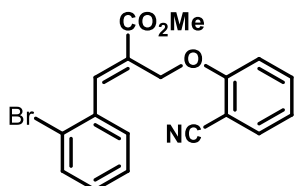

White solid, Yield (85%), M.P (115 °C), <sup>1</sup>H NMR (400 MHz, CDCl<sub>3</sub>) δ 8.13 (s, 1H), 7.66 – 7.50 (m, 4H), 7.36-7.31 (m, 1H), 7.23 (dd, *J* = 7.7, 1.5 Hz, 1H), 7.06 – 7.01 (m, 2H), 4.84 (s, 2H), 3.81 (s, 3H); <sup>13</sup>C NMR (100 MHz, CDCl<sub>3</sub>) δ 166.81, 160.24, 145.51, 134.81, 134.44, 133.93, 132.88, 131.00, 127.95, 127.85, 124.20, 121.54, 116.42, 113.54, 102.78, 64.39, 52.70. HRMS (ESI): calc. for [(C<sub>18</sub>H<sub>14</sub>BrNO<sub>3</sub>)] (M+H) 372.0235, measured 372.0247.

**Methyl (*E*)-2-((2-cyanophenoxy) methyl)-3-(*p*-tolyl) acrylate (1i)**

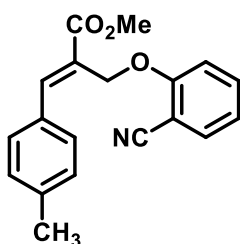

White solid, Yield (94%), M.P (96 °C), <sup>1</sup>H NMR (400 MHz, CDCl<sub>3</sub>) δ 8.08 (s, 1H), 7.60 – 7.49 (m, 2H), 7.42 (d, *J* = 8.1 Hz, 2H), 7.22 (d, *J* = 8.0 Hz, 2H), 7.12 – 6.99 (m, 2H), 4.97 (s, 2H), 3.86 (s, 3H), 2.37 (s, 3H). <sup>13</sup>C NMR (100 MHz, CDCl<sub>3</sub>) δ 167.72, 160.42, 147.10, 140.47, 134.48, 134.00, 131.45, 129.98, 129.69, 125.25, 121.40, 116.50, 113.53, 102.74, 64.29, 52.55, 21.54. HRMS (ESI): calc. for [(C<sub>19</sub>H<sub>17</sub>NO<sub>3</sub>)] (M+H) 308.1287, measured 308.1314.

**Methyl (*E*)-2-((2-cyanophenoxy) methyl)-3-(4-ethylphenyl) acrylate (1j)**

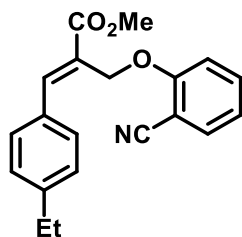

White solid, Yield (91%), M.P (95 °C),  $^1\text{H}$  NMR (400 MHz,  $\text{CDCl}_3$ )  $\delta$  8.09 (s, 1H), 7.61 – 7.50 (m, 2H), 7.46 (d,  $J$  = 8.1 Hz, 2H), 7.26 (t,  $J$  = 5.8 Hz, 2H), 7.12 (d,  $J$  = 8.5 Hz, 1H), 7.05 (t,  $J$  = 7.6 Hz, 1H), 4.99 (s, 2H), 3.87 (s, 3H), 2.67 (q,  $J$  = 7.6 Hz, 2H), 1.24 (t,  $J$  = 7.6 Hz, 3H).  $^{13}\text{C}$  NMR (100 MHz,  $\text{CDCl}_3$ )  $\delta$  167.61, 160.41, 146.99, 146.65, 134.41, 133.96, 131.69, 130.06, 128.48, 125.28, 121.36, 116.47, 113.53, 102.79, 64.29, 52.46, 28.84, 15.37. HRMS (ESI): calc. for  $[(\text{C}_{20}\text{H}_{19}\text{NO}_3)]$  (M+H) 322.1443, measured 322.1448.

**Methyl (*E*)-2-((2-cyanophenoxy) methyl)-3-(4-isopropylphenyl) acrylate (1k)**

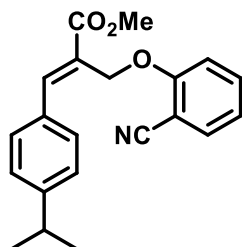

White solid, Yield (89%), M.P (91 °C),  $^1\text{H}$  NMR (400 MHz,  $\text{CDCl}_3$ )  $\delta$  8.06 (s, 1H), 7.59 – 7.42 (m, 5H), 7.24 (d,  $J$  = 0.7 Hz, 1H), 7.09 (d,  $J$  = 8.5 Hz, 1H), 7.02 (td,  $J$  = 7.6, 0.9 Hz, 1H), 4.96 (s, 2H), 3.84 (s, 3H), 2.97 – 2.83 (m, 1H), 1.24 (s, 3H), 1.22 (s, 3H).  $^{13}\text{C}$  NMR (100 MHz,  $\text{CDCl}_3$ )  $\delta$  167.51, 160.31, 151.15, 146.86, 134.37, 133.85, 131.73, 130.01, 126.98, 125.18, 121.29, 116.39, 113.43, 102.64, 64.20, 52.36, 34.04, 23.76. HRMS (ESI): calc. for  $[(\text{C}_{21}\text{H}_{23}\text{NO}_3)]$  (M+H) 336.1600, measured 336.1593.

**Methyl (*E*)-2-((2-cyanophenoxy) methyl)-3-(4-methoxyphenyl) acrylate (1l)**

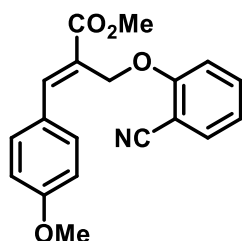

White solid, Yield (94%), M.P (109 °C),  $^1\text{H}$  NMR (400 MHz,  $\text{CDCl}_3$ )  $\delta$  8.04 (s, 1H), 7.63 – 7.46 (m, 3H), 7.15 (d,  $J$  = 8.4 Hz, 2H), 7.04 (t,  $J$  = 7.5 Hz, 2H), 6.93 (d,  $J$  = 8.4 Hz, 2H), 5.00 (s, 2H), 3.85 (s, 3H), 3.82 (s, 3H).  $^{13}\text{C}$  NMR (100 MHz,  $\text{CDCl}_3$ )  $\delta$  167.78, 161.22, 160.40, 146.82, 134.44, 133.93, 131.97, 126.79, 123.70, 121.36, 116.49, 114.42, 113.59, 102.75,

64.34, 55.45, 52.40. HRMS (ESI): calc. for [(C<sub>19</sub>H<sub>17</sub>NO<sub>4</sub>)] (M+H) 324.1236, measured 324.1245.

**Methyl (*E*)-3-(benzo[d][1,3]dioxol-5-yl)-2-((2-cyanophenoxy) methyl) acrylate (1m)**

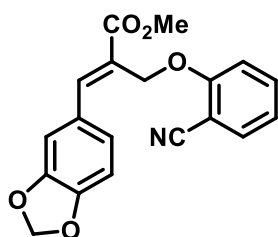

White solid, Yield (86%), M.P (121 °C), <sup>1</sup>H NMR (400 MHz, CDCl<sub>3</sub>) δ 7.99 (s, 1H), 7.62 – 7.50 (m, 2H), 7.14 (d, J = 8.5 Hz, 1H), 7.10 – 7.01 (m, 3H), 6.84 (d, J = 8.5 Hz, 1H), 6.00 (s, 2H), 4.99 (s, 2H), 3.84 (s, 3H). <sup>13</sup>C NMR (100 MHz, CDCl<sub>3</sub>) δ 167.66, 160.33, 149.40, 148.31, 146.73, 134.44, 133.99, 128.30, 125.57, 124.31, 121.45, 116.47, 113.57, 109.74, 108.82, 102.81, 101.70, 64.16, 52.50. HRMS (ESI): calc. for [(C<sub>19</sub>H<sub>15</sub>NO<sub>5</sub>)] (M+Na) 360.0848, measured 360.0845.

**Methyl (*E*)-2-((2-cyanophenoxy) methyl)-3-(4-fluorophenyl) acrylate (1n)**

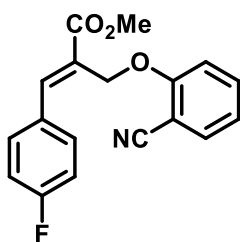

White solid, Yield (87%), M.P (102 °C), <sup>1</sup>H NMR (400 MHz, CDCl<sub>3</sub>) δ 8.04 (s, 1H), 7.59 – 7.49 (m, 4H), 7.14 – 7.00 (m, 4H), 4.94 (s, 2H), 3.85 (s, 3H). <sup>13</sup>C NMR (100 MHz, CDCl<sub>3</sub>) δ 167.29, 164.90, 162.40, 160.21, 145.71, 134.48, 133.93, 131.99, 131.91, 130.38, 130.35, 125.97, 125.96, 121.57, 116.41, 116.19, 115.98, 113.56, 102.76, 64.07, 52.55. HRMS (ESI): calc. for [(C<sub>18</sub>H<sub>14</sub>FNO<sub>3</sub>)] (M+Na) 334.0855, measured 334.0852.

**Methyl (*E*)-3-(4-chlorophenyl)-2-((2-cyanophenoxy) methyl) acrylate (1o)**

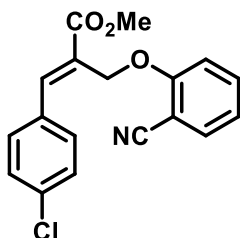

White solid, Yield (84%), M.P (99 °C), <sup>1</sup>H NMR (400 MHz, CDCl<sub>3</sub>) δ 8.04 (s, 1H), 7.61 – 7.42 (m, 4H), 7.38 (d, J = 8.4 Hz, 2H), 7.14 – 7.01 (m, 2H), 4.92 (s, 2H), 3.86 (s, 3H). <sup>13</sup>C NMR (100 MHz, CDCl<sub>3</sub>) δ 167.20, 160.21, 145.54, 136.17, 134.50, 133.99, 132.68, 131.12,

129.23, 126.78, 121.64, 116.41, 113.59, 102.85, 64.06, 52.65. HRMS (ESI): calc. for  $[(C_{18}H_{14}ClNO_3)]$  (M+Na) 350.0560, measured 350.0541.

**Methyl (*E*)-3-(4-bromophenyl)-2-((2-cyanophenoxy)methyl)acrylate (1p)**

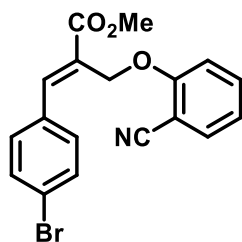

White solid, Yield (86%), M.P (121 °C),  $^1H$  NMR (400 MHz,  $CDCl_3$ )  $\delta$  8.02 (s, 1H), 7.63 – 7.51 (m, 4H), 7.40 (d,  $J$  = 8.4 Hz, 2H), 7.12 – 7.00 (m, 2H), 4.92 (s, 2H), 3.86 (s, 3H).  $^{13}C$  NMR (100 MHz,  $CDCl_3$ )  $\delta$  167.19, 160.21, 145.62, 134.50, 134.01, 133.13, 132.20, 131.31, 126.88, 124.56, 121.66, 116.41, 113.58, 102.86, 64.06, 52.68. HRMS (ESI): calc. for  $[(C_{18}H_{14}BrNO_3)]$  (M+H) 372.0235, measured 372.0239.

**Methyl (*E*)-2-((2-cyanophenoxy) methyl)-3-(furan-2-yl)acrylate (1q)**

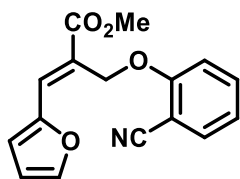

White solid, Yield (80%), M.P (196 °C),  $^1H$  NMR (400 MHz,  $CDCl_3$ )  $\delta$  7.69 (s, 1H), 7.52 (dd,  $J$  = 9.6, 3.7 Hz, 3H), 7.17 (d,  $J$  = 8.9 Hz, 1H), 6.99 (t,  $J$  = 7.6 Hz, 1H), 6.85 (d,  $J$  = 3.4 Hz, 1H), 6.53 – 6.50 (m, 1H), 5.26 (s, 2H), 3.83 (s, 3H).  $^{13}C$  NMR (100 MHz,  $CDCl_3$ )  $\delta$   $^{13}C$  NMR (100 MHz,  $CDCl_3$ )  $\delta$  167.55, 160.64, 150.24, 146.15, 134.35, 133.83, 131.42, 121.44, 121.07, 118.76, 116.44, 113.38, 112.76, 102.58, 77.48, 77.16, 76.84, 64.00, 52.47. HRMS (ESI): calc. for  $[(C_{16}H_{13}NO_4)]$  (M+Na) 284.0923 measured 284.0930.

**Methyl (*E*)-2-((2-cyanophenoxy) methyl)-3-(thiophen-2-yl) acrylate (1r)**

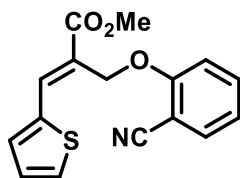

White solid, Yield (82%), M.P: 196°C,  $^1H$  NMR (400 MHz,  $CDCl_3$ )  $\delta$  8.17 (s, 1H), 7.56 (dd,  $J$  = 10.4, 6.2 Hz, 3H), 7.44 (d,  $J$  = 3.4 Hz, 1H), 7.19 (d,  $J$  = 8.8 Hz, 1H), 7.15 – 7.10 (m, 1H), 7.04 (t,  $J$  = 7.6 Hz, 1H), 5.16 (s, 2H), 3.86 (s, 3H).  $^{13}C$  NMR (100 MHz,  $CDCl_3$ )  $\delta$  167.51, 160.31, 138.86, 136.97, 134.43, 134.12, 134.09, 132.04, 128.15, 121.93, 121.26, 116.43, 113.06, 102.59, 63.65, 52.55. HRMS (ESI): calc. for  $[(C_{16}H_{13}NO_3S)]$  (M+Na) 322.0514, measured 322.0509.

**Methyl (E)-2-((2-cyanophenoxy) methyl)-3-(2-nitrophenyl) acrylate (1t)**

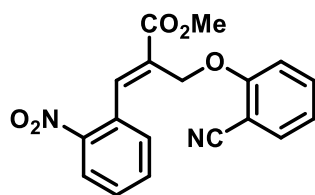

White solid, Yield (79%),  $^1\text{H}$  NMR (400 MHz,  $\text{CDCl}_3$ )  $\delta$  8.31 (s, 1H), 8.18 (d,  $J = 8.1$  Hz, 1H), 7.71 (d,  $J = 7.0$  Hz, 2H), 7.52 (dt,  $J = 18.3, 7.5$  Hz, 3H), 7.01 (t,  $J = 7.4$  Hz, 2H), 4.79 (s, 1H), 3.88 (s, 2H).  $^{13}\text{C}$  NMR (100 MHz,  $\text{CDCl}_3$ )  $\delta$  166.39, 159.99, 147.13, 143.37, 134.45, 134.32, 133.76, 131.77, 130.41, 130.27, 127.57, 125.03, 121.67, 116.32, 113.55, 102.57, 64.33, 52.71. HRMS (ESI): calc. for  $[(\text{C}_{18}\text{H}_{14}\text{N}_2\text{O}_5)]$  (M+H) 338.0903, measured 338.1004

**Methyl (E)-2-((2-cyanophenoxy) methyl)-3-(3-((E)-3-ethoxy-3-oxoprop-1-en-1-yl)phenyl)acrylate (3a)**

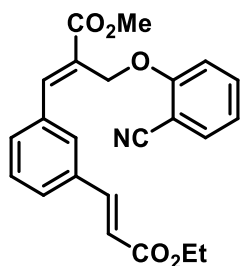

White solid; Yield (72%), M.P (106 °C);  $^1\text{H}$  NMR (400 MHz,  $\text{CDCl}_3$ )  $\delta$  8.09 (s, 1H), 7.64 – 7.58 (m, 3H), 7.55 – 7.50 (m, 3H), 7.43 (t,  $J = 7.7$  Hz, 1H), 7.09 – 7.00 (m, 2H), 6.32 (d,  $J = 16.1$  Hz, 1H), 4.94 (s, 2H), 4.24 (q,  $J = 7.1$  Hz, 2H), 3.88 (s, 3H), 1.32 (t,  $J = 7.1$  Hz, 3H).  $^{13}\text{C}$  NMR (100 MHz,  $\text{CDCl}_3$ )  $\delta$  167.20, 166.82, 160.13, 145.95, 143.68, 135.17, 135.02, 134.50, 134.10, 131.25, 129.57, 129.34, 129.05, 127.25, 121.61, 119.43, 116.38, 113.37, 102.80, 63.97, 60.72, 52.69, 14.43. HRMS (ESI): calc. for  $[(\text{C}_{23}\text{H}_{21}\text{NO}_5)]$  (M+H) 392.1500, measured 392.1502.

**Methyl (E)-2-((2-cyanophenoxy)methyl)-3-(3-((E)-3-methoxy-3-oxoprop-1-en-1-yl)phenyl)acrylate (3b)**

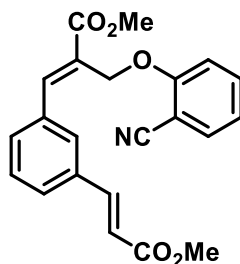

White solid; Yield (70%), M.P (104 °C);  $^1\text{H}$  NMR (400 MHz,  $\text{CDCl}_3$ )  $\delta$  8.08 (s, 1H), 7.64 – 7.58 (m, 3H), 7.55 – 7.50 (m, 3H), 7.43 (t,  $J = 7.7$  Hz, 1H), 7.06 (dd,  $J = 14.5, 7.9$  Hz, 2H), 6.33 (d,  $J = 16.1$  Hz, 1H), 4.94 (s, 2H), 3.87 (s, 3H), 3.78 (s, 3H).  $^{13}\text{C}$  NMR (100 MHz,  $\text{CDCl}_3$ )  $\delta$  167.21, 167.16, 160.12, 145.88, 143.94, 135.07, 135.03, 134.48, 134.08, 131.29, 129.57, 129.34, 129.05, 127.29, 121.59, 118.95, 116.38, 113.38, 102.79, 63.97, 52.67, 51.88. HRMS (ESI): calc. for  $[(\text{C}_{22}\text{H}_{19}\text{NO}_5)]$  (M+H) 378.1300, measured 378.1350.

**Methyl (*E*)-3-(3-((*E*)-3-butoxy-3-oxoprop-1-en-1-yl)phenyl)-2-((2 cyanophenoxy)methyl) acrylate (3c)**

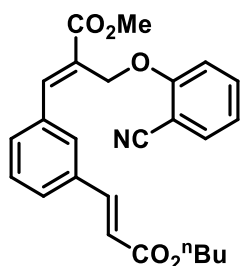

Colorless liquid; Yield (66%),  $^1\text{H}$  NMR (400 MHz,  $\text{CDCl}_3$ )  $\delta$  8.09 (s, 1H), 7.68 – 7.48 (m, 7H), 7.43 (t,  $J = 7.7$  Hz, 1H), 7.15 – 7.02 (m, 2H), 6.33 (d,  $J = 16.0$  Hz, 1H), 4.93 (s, 2H), 4.18 (t,  $J = 4.6$  Hz, 2H), 3.88 (s, 3H), 1.69 – 0.98 (m, 4H), 0.96 (t,  $J = 7.4$  Hz, 3H).  $^{13}\text{C}$  NMR (100 MHz,  $\text{CDCl}_3$ )  $\delta$  167.21, 166.94, 160.15, 145.98, 143.66, 135.20, 135.04, 134.50, 134.12, 131.25, 130.20, 129.59, 129.37, 129.07, 127.23, 121.61, 119.47, 116.40, 113.37, 64.67, 63.98, 52.71, 30.88, 23.92, 19.33, 13.91. HRMS (ESI): calc. for  $[(\text{C}_{25}\text{H}_{25}\text{NO}_5)]$  (M+H) 420.1811 measured 420.1813.

**Methyl (*E*)-3-(3-((*E*)-3-(tert-butoxy)-3-oxoprop-1-en-1-yl) phenyl)-2-((2cyanophenoxy) methyl) acrylate (3d)**

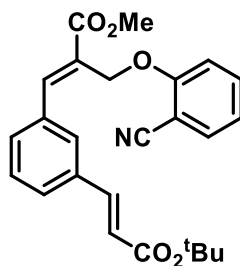

Colorless liquid; Yield (69%),  $^1\text{H}$  NMR (400 MHz,  $\text{CDCl}_3$ )  $\delta$  8.09 (s, 1H), 7.63 – 7.38 (m, 7H), 7.18 – 6.96 (m, 2H), 6.27 (d,  $J = 16.0$  Hz, 1H), 4.94 (s, 2H), 3.88 (s, 3H), 1.51 (s, 9H).  $^{13}\text{C}$  NMR (100 MHz,  $\text{CDCl}_3$ )  $\delta$  167.23, 166.14, 160.16, 146.04, 142.64, 135.38, 134.97, 134.49, 134.08, 130.98, 129.52, 129.24, 129.03, 127.17, 121.58, 121.35, 116.38, 113.36, 102.79, 80.83, 63.97, 52.68, 28.30. HRMS (ESI): calc. for  $[(\text{C}_{25}\text{H}_{25}\text{NO}_5)]$  (M+H) 420.1811, measured 420.1812.

**Methyl (E)-2-((2-cyanophenoxy)methyl)-3-(3-((E)-3-oxo-3-(((1R,2R,4R)-1,7,7-trimethylbicyclo[2.2.1]heptan-2-yl)oxy)prop-1-en-1-yl)phenyl) acrylate (3e)**

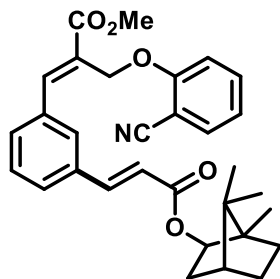

Colorless liquid; Yield (74%),  $^1\text{H}$  NMR (400 MHz,  $\text{CDCl}_3$ )  $\delta$  8.08 (s, 1H), 7.60 – 7.36 (m, 7H), 7.10 – 6.96 (m, 2H), 6.34 (d,  $J = 16.0$  Hz, 1H), 4.93 (s, 2H), 4.76 (dt,  $J = 8.8, 4.4$  Hz, 1H), 3.86 (s, 3H), 1.75 (t,  $J = 4.1$  Hz, 3H), 1.62 – 1.52 (m, 1H), 1.25 – 1.04 (m, 3H), 1.01 (s, 3H), 0.86 (s, 3H), 0.85 (s, 3H).  $^{13}\text{C}$  NMR (100 MHz,  $\text{CDCl}_3$ )  $\delta$  167.17, 166.39, 160.11, 145.89, 143.39, 135.15, 134.95, 134.47, 133.99, 133.13, 131.10, 129.50, 129.25, 129.09, 127.19, 121.57, 120.38, 119.92, 116.28, 113.32, 102.65, 81.43, 63.91, 52.62, 48.97, 47.04, 45.13, 38.89, 33.80, 27.12, 20.20, 20.08, 11.56. HRMS (ESI): calc. for  $[(\text{C}_{31}\text{H}_{33}\text{NO}_5)]$  (M+Na) 522.2256, measured 522.2254.

**Methyl (E)-2-((2-cyanophenoxy)methyl)-3-(3-((E)-3-oxo-3-phenoxyprop-1-en-1-yl)phenyl) acrylate (3f)**

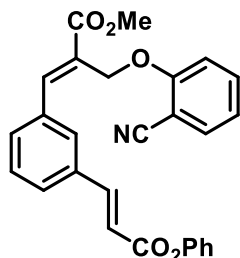

White solid; Yield (78%), M.P (114 °C),  $^1\text{H}$  NMR (400 MHz,  $\text{CDCl}_3$ )  $\delta$  8.03 (s, 1H), 7.72 (d,  $J = 16.0$  Hz, 1H), 7.62 (s, 1H), 7.57 – 7.28 (m, 7H), 7.26 – 6.89 (m, 6H), 6.42 (d,  $J = 16.0$  Hz, 1H), 4.88 (s, 2H), 3.81 (s, 3H).  $^{13}\text{C}$  NMR (100 MHz,  $\text{CDCl}_3$ )  $\delta$  167.14, 165.16, 160.03, 150.78, 145.83, 145.60, 135.09, 134.82, 134.51, 134.38, 134.10, 131.71, 129.65, 129.61, 129.54, 129.12, 127.32, 125.93, 121.65, 118.41, 116.36, 113.32, 102.71, 63.92, 52.68. HRMS (ESI): calc. for  $[(\text{C}_{27}\text{H}_{21}\text{NO}_5)]$  (M+H) 440.1498, measured 440.1494.

**Methyl (E)-3-(3-((E)-3-(benzyloxy)-3-oxoprop-1-en-1-yl)phenyl)-2-((2-cyanophenoxy)methyl) acrylate (3g)**



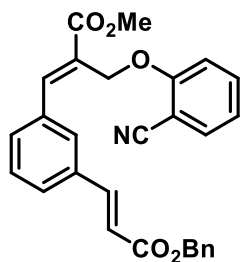

Colorless liquid; Yield (71%),  $^1\text{H}$  NMR (400 MHz,  $\text{CDCl}_3$ )  $\delta$  8.09 (s, 1H), 7.69 – 7.36 (m, 13H), 7.05 (d,  $J$  = 9.0 Hz, 1H), 6.96 (d,  $J$  = 7.6 Hz, 1H), 6.35 (d,  $J$  = 16.0 Hz, 1H), 5.22 (s, 2H), 4.92 (s, 2H), 3.88 (s, 3H).  $^{13}\text{C}$  NMR (100 MHz,  $\text{CDCl}_3$ )  $\delta$  167.20, 166.63, 160.03, 145.97, 144.28, 136.04, 135.04, 134.47, 134.13, 133.04, 131.42, 129.80, 129.59, 129.54, 128.94, 128.92, 128.74, 128.50, 128.46, 127.25, 121.60, 120.84, 118.97, 113.23, 102.67, 66.61, 63.92, 52.71. HRMS (ESI): calc. for  $[(\text{C}_{28}\text{H}_{23}\text{NO}_5)]$  (M+H) 454.1649, measured 454.1654.

**Methyl (E)-2-((2-cyanophenoxy)methyl)-3-(3-((E)-3-oxo-3-((tetrahydrofuran-2-yl)methoxy)prop-1-en-1-yl)phenyl)acrylate (3h)**

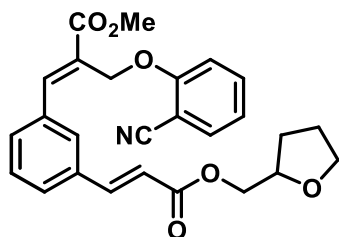

Colorless liquid; Yield (73%),  $^1\text{H}$  NMR (400 MHz,  $\text{CDCl}_3$ )  $\delta$  7.95 (s, 1H), 7.68 (d,  $J$  = 16.0 Hz, 1H), 7.56 – 7.31 (m, 6H), 6.48 (d,  $J$  = 16.0 Hz, 1H), 4.91 (s, 2H), 4.28 (dd,  $J$  = 10.9, 3.1 Hz, 1H), 4.21 – 4.11 (m, 2H), 3.94 – 3.87 (m, 1H), 3.84 (s, 3H), 3.81 (dd,  $J$  = 10.8, 4.4 Hz, 1H), 3.67 (s, 1H), 2.06 – 1.87 (m, 4H).  $^{13}\text{C}$  NMR (100 MHz,  $\text{CDCl}_3$ )  $\delta$  170.72, 167.16, 166.69, 144.62, 144.20, 135.03, 135.01, 130.92, 130.38, 129.44, 129.17, 129.12, 128.96, 128.85, 128.45, 128.25, 127.79, 119.04, 76.66, 68.58, 66.80, 59.25, 52.52, 28.11, 25.79, 21.02. HRMS (ESI): calc. for  $[(\text{C}_{26}\text{H}_{25}\text{NO}_6)]$  (M+H) 448.1760, measured 448.1745.

**Methyl (E)-2-((2-cyanophenoxy) methyl)-3-(3-((E)-3-((2-ethylhexyl)oxy)-3-oxoprop-1-en-1-yl)phenyl)acrylate (3i)**

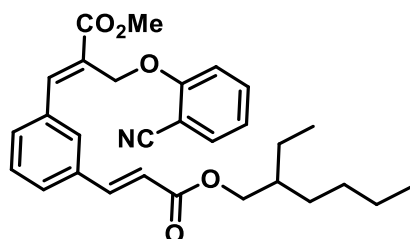

Colorless liquid; Yield (83%),  $^1\text{H}$  NMR (400 MHz,  $\text{CDCl}_3$ )  $\delta$  8.09 (s, 1H), 7.64 – 7.50 (m, 6H), 7.43 (t,  $J = 7.7$  Hz, 1H), 7.09 – 7.02 (m, 2H), 6.36 (d,  $J = 16.0$  Hz, 1H), 4.95 (s, 2H), 4.10 (dd,  $J = 5.7, 4.3$  Hz, 2H), 3.87 (s, 3H), 1.64 – 1.60 (m, 1H), 1.42 – 1.23 (m, 9H), 0.94 – 0.88 (m, 7H).  $^{13}\text{C}$  NMR (100 MHz,  $\text{CDCl}_3$ )  $\delta$  167.18, 167.03, 160.17, 145.88, 143.62, 135.21, 135.04, 134.45, 134.04, 131.18, 129.55, 129.33, 129.07, 127.32, 121.61, 119.52, 116.31, 113.45, 102.86, 67.22, 64.02, 52.66, 38.99, 30.56, 29.09, 23.96, 23.10, 14.18, 11.14. HRMS (ESI): calc. for  $[(\text{C}_{29}\text{H}_{33}\text{NO}_5)]$  (M+H) 476.2437, measured 476.2434.

**Methyl (*E*)-3-(3-((*E*)-3-(3-(acryloyloxy) phenoxy)-3-oxoprop-1-en-1-yl) phenyl)-2-((2-cyanophenoxy) methyl) acrylate (3j)**

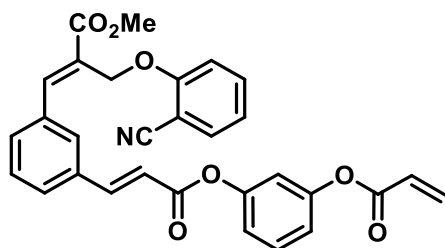

Colorless liquid; Yield (60%),  $^1\text{H}$  NMR (400 MHz,  $\text{CDCl}_3$ )  $\delta$  8.11 (s, 1H), 7.79 (d,  $J = 16.0$  Hz, 1H), 7.70 (s, 1H), 7.67 – 7.30 (m, 6H), 7.15 – 6.92 (m, 5H), 6.62 (dd,  $J = 17.3, 1.2$  Hz, 1H), 6.47 (d,  $J = 16.0$  Hz, 1H), 6.32 (dd,  $J = 17.3, 10.4$  Hz, 1H), 6.03 (dd,  $J = 10.4, 1.2$  Hz, 1H), 4.96 (s, 2H), 3.88 (s, 3H).  $^{13}\text{C}$  NMR (100 MHz,  $\text{CDCl}_3$ )  $\delta$  167.14, 164.71, 164.27, 160.03, 151.25, 151.13, 145.99, 145.84, 135.13, 134.75, 134.53, 134.16, 133.11, 131.84, 129.87, 129.68, 129.15, 127.81, 127.36, 121.68, 119.17, 119.08, 118.10, 116.38, 115.56, 113.30, 102.73, 63.92, 52.71. HRMS (ESI): calc. for  $[(\text{C}_{30}\text{H}_{23}\text{NO}_7)]$  (M+H) 510.1553, measured 510.1554.

**Dimethyl 2-(3-((*E*)-2-((2-cyanophenoxy)methyl)-3-methoxy-3-oxoprop-1-en-1-yl)phenyl) maleate (3k)**

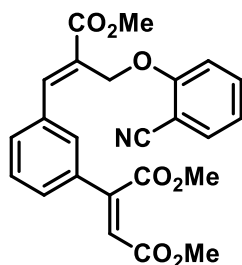

Colorless liquid; Yield (81%),  $^1\text{H}$  NMR (400 MHz,  $\text{CDCl}_3$ )  $\delta$  8.05 (s, 1H), 7.61 – 7.43 (m, 4H), 7.38 (s, 1H), 7.17 – 6.95 (m, 3H), 4.93 (s, 3H), 3.85 (s, 3H), 3.74 (s, 3H), 3.56 (s, 3H).  $^{13}\text{C}$  NMR (100 MHz,  $\text{CDCl}_3$ )  $\delta$  167.06, 165.32, 164.49, 160.12, 145.26, 142.39, 134.40, 134.29, 133.98, 133.85, 132.52, 131.77, 130.73, 130.30, 129.61, 127.30, 121.50, 116.27,

113.61, 102.72, 63.97, 53.18, 52.60, 52.06. HRMS (ESI): calc. for [(C<sub>24</sub>H<sub>21</sub>NO<sub>7</sub>)] (M+H) 436.1396, measured 436.1391.

**Diethyl 2-(3-((*E*)-2-((2-cyanophenoxy)methyl)-3-methoxy-3-oxoprop-1-en-1-yl)phenyl) maleate (3l)**

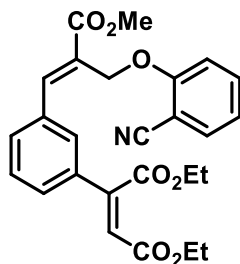

Colorless liquid; Yield (82%), <sup>1</sup>H NMR (400 MHz, CDCl<sub>3</sub>) δ 8.09 (s, 1H), 7.57 – 7.47 (m, 3H), 7.43 – 7.38 (m, 2H), 7.26 (s, 1H), 7.07 (d, *J* = 8.5 Hz, 1H), 7.02 (t, *J* = 7.8 Hz, 1H), 6.98 (s, 1H), 4.97 (s, 2H), 4.20 (q, *J* = 7.1 Hz, 2H), 4.01 (q, *J* = 7.1 Hz, 2H), 3.86 (s, 3H), 1.26 (t, *J* = 7.1 Hz, 3H), 1.07 (t, *J* = 7.1 Hz, 3H). <sup>13</sup>C NMR (100 MHz, CDCl<sub>3</sub>) δ 167.35, 165.95, 165.05, 160.37, 146.25, 143.63, 138.81, 134.66, 134.31, 133.89, 133.79, 130.46, 130.35, 129.59, 129.39, 128.36, 126.95, 126.55, 121.34, 116.39, 113.65, 102.80, 64.14, 62.18, 61.04, 52.58, 14.19, 13.98. HRMS (ESI): calc. for [(C<sub>26</sub>H<sub>25</sub>NO<sub>7</sub>)] (M+H) 464.1709, measured 464.1718.

**Dibutyl 2-(3-((*E*)-2-((2-cyanophenoxy) methyl)-3-methoxy-3-oxoprop-1-en-1-yl)phenyl) maleate (3m)**

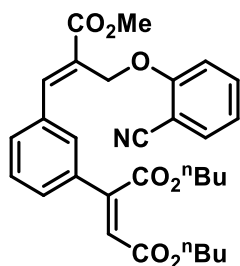

Colorless liquid; Yield (86%), <sup>1</sup>H NMR (400 MHz, CDCl<sub>3</sub>) δ 8.09 (s, 1H), 7.58 – 7.35 (m, 6H), 7.11 – 7.01 (m, 2H), 6.99 (s, 1H), 4.97 (s, 2H), 4.14 (t, *J* = 6.6 Hz, 2H), 3.96 (t, *J* = 6.6 Hz, 2H), 3.87 (s, 3H), 1.64 – 1.57 (m, 2H), 1.45 – 1.38 (m, 2H), 1.33 (dd, *J* = 15.0, 7.5 Hz, 2H), 1.22 – 1.13 (m, 2H), 0.90 (t, *J* = 7.4 Hz, 3H), 0.83 (t, *J* = 7.3 Hz, 3H). <sup>13</sup>C NMR (100 MHz, CDCl<sub>3</sub>) δ 167.34, 166.02, 165.23, 160.37, 146.20, 143.47, 134.75, 134.30, 133.89, 133.81, 130.46, 130.32, 129.71, 129.53, 129.40, 128.37, 126.96, 121.35, 116.38, 113.65, 102.82, 66.01, 64.99, 64.13, 52.57, 30.54, 30.42, 19.20, 19.05, 13.76, 13.73. HRMS (ESI): calc. for [(C<sub>30</sub>H<sub>33</sub>NO<sub>7</sub>)] (M+H) 520.2335, measured 520.2342.

**Methyl (E)-2-((2-cyanophenoxy) methyl)-3-(3-((E)-3-oxo-1-phenylprop-1-en-1-yl) phenyl) acrylate (3n)**

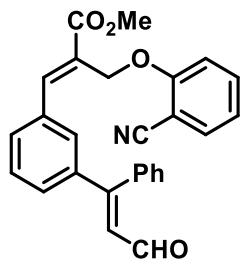

Yellow liquid; Yield (66%), (E/Z = 9/1),  $^1\text{H}$  NMR (400 MHz,  $\text{CDCl}_3$ )  $\delta$  9.46 (d,  $J = 7.9$  Hz, 1H), 8.04 (s, 1H), 7.65 – 7.30 (m, 11H), 7.25 – 7.20 (m, 2H), 7.06 (td,  $J = 7.6, 0.8$  Hz, 1H), 6.99 (d,  $J = 8.5$  Hz, 1H), 6.49 (d,  $J = 7.9$  Hz, 1H), 4.87 (s, 2H), 3.85 (s, 3H).  $^{13}\text{C}$  NMR (100 MHz,  $\text{CDCl}_3$ )  $\delta$  193.36, 167.12, 161.44, 160.05, 145.69, 140.62, 136.20, 134.74, 134.43, 134.13, 131.70, 130.66, 130.01, 129.78, 129.76, 129.39, 128.51, 127.93, 127.08, 121.51, 116.29, 113.01, 102.70, 63.72, 52.70. HRMS (ESI): calc. for  $[(\text{C}_{27}\text{H}_{21}\text{NO}_4)]$  (M+H) 424.1549, measured 424.1529.

**Methyl (E)-2-((2-cyanophenoxy) methyl)-3-(3-((E)-3-methoxy-3-oxo-1-phenylprop-1-en-1-yl) phenyl) acrylate (3o)**

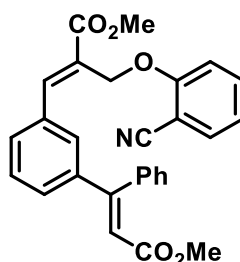

Yellow liquid; Yield (63%),  $^1\text{H}$  NMR (400 MHz,  $\text{CDCl}_3$ )  $\delta$  8.03 (s, 1H), 7.58 – 7.50 (m, 3H), 7.39 – 7.27 (m, 6H), 7.14 – 7.11 (m, 2H), 7.06 – 6.97 (m, 2H), 6.28 (s, 1H), 4.86 (s, 2H), 3.84 (s, 3H), 3.58 (s, 3H).  $^{13}\text{C}$  NMR (100 MHz,  $\text{CDCl}_3$ )  $\delta$  167.16, 166.23, 160.13, 156.16, 145.88, 141.59, 138.31, 130.70, 130.63, 129.59, 129.54, 129.12, 129.01, 128.55, 128.45, 128.30, 128.04, 126.91, 121.38, 117.75, 113.11, 102.76, 63.80, 52.60, 51.40. HRMS (ESI): calc. for  $[(\text{C}_{28}\text{H}_{23}\text{NO}_5)]$  (M+H) 454.1654, measured 454.1617.

**Methyl (E)-2-((2-cyanophenoxy)methyl)-3-(3-((E)-3-oxo-1-phenylbut-1-en-1-yl) phenyl) acrylate (3p)**

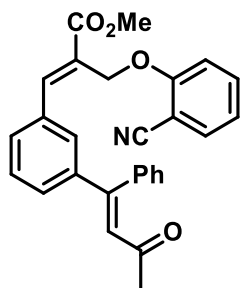

Yellow liquid; Yield (68%),  $^1\text{H}$  NMR (400 MHz,  $\text{CDCl}_3$ )  $\delta$  8.03 (s, 1H), 7.59 – 7.48 (m, 4H), 7.42 – 7.28 (m, 6H), 7.12 (dd,  $J = 6.4, 3.1$  Hz, 2H), 7.06 – 6.98 (m, 3H), 6.46 (s, 1H), 4.86 (s, 2H), 3.84 (s, 3H), 1.83 (s, 3H).  $^{13}\text{C}$  NMR (100 MHz,  $\text{CDCl}_3$ )  $\delta$  200.09, 167.07, 160.02, 152.85, 145.89, 141.53, 138.36, 134.43, 134.35, 133.93, 130.63, 129.58, 129.50, 129.41, 129.02, 128.93, 128.47, 128.26, 126.77, 121.37, 116.21, 112.98, 102.56, 63.70, 52.52, 30.29. HRMS (ESI): calc. for  $[(\text{C}_{28}\text{H}_{23}\text{NO}_4)]$  (M+H) 438.1705, measured 438.1695.

**Methyl (E)-2-((2-cyanophenoxy) methyl)-3-(3-((E)-3-methoxy-3-oxoprop-1-en-1-yl)phenyl) acrylate (3q)**

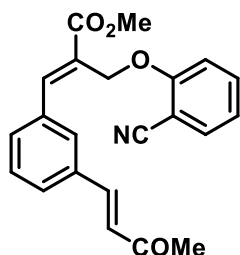

Colorless solid; Yield (60%), M.P (106 °C);  $^1\text{H}$  NMR (400 MHz,  $\text{CDCl}_3$ )  $\delta$  8.11 (s, 1H), 7.74 (s, 1H), 7.66 – 7.37 (m, 6H), 7.15 (d,  $J = 8.4$  Hz, 1H), 7.06 (td,  $J = 7.6, 0.8$  Hz, 1H), 6.63 (d,  $J = 16.3$  Hz, 1H), 4.95 (s, 2H), 3.88 (s, 3H), 2.33 (s, 3H).  $^{13}\text{C}$  NMR (100 MHz,  $\text{CDCl}_3$ )  $\delta$  198.44, 167.21, 160.20, 146.13, 142.57, 135.28, 135.08, 134.58, 134.01, 131.60, 129.59, 129.39, 129.36, 127.96, 127.28, 121.67, 116.50, 113.56, 102.75, 63.99, 52.70, 27.83. HRMS (ESI): calc. for  $[(\text{C}_{22}\text{H}_{19}\text{NO}_4)]$  (M+H) 362.1400, measured 362.1433.

**Methyl (E)-2-((2-cyanophenoxy)methyl)-3-(3-((E)-2-(phenylsulfonyl)vinyl)phenyl) acrylate (3r)**

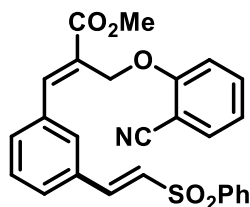

White solid; Yield (64%), M.P (114 °C),  $^1\text{H}$  NMR (400 MHz,  $\text{CDCl}_3$ )  $\delta$  8.06 (s, 1H), 7.96 – 7.89 (m, 2H), 7.66 – 7.60 (m, 3H), 7.57 – 7.43 (m, 8H), 7.18 – 7.15 (m, 1H), 7.10 – 7.03 (m, 2H), 6.80 (d,  $J = 15.5$  Hz, 1H), 4.92 (s, 2H), 3.87 (s, 3H).  $^{13}\text{C}$  NMR (100 MHz,  $\text{CDCl}_3$ )  $\delta$

167.05, 160.02, 145.56, 141.61, 140.54, 135.28, 134.57, 134.11, 133.62, 133.17, 132.20, 130.01, 129.77, 129.48, 129.23, 129.17, 128.53, 128.36, 127.87, 127.63, 125.43, 121.77, 116.42, 113.37, 102.69, 63.83, 52.74. HRMS (ESI): calc. for [(C<sub>26</sub>H<sub>21</sub>NO<sub>5</sub>S)] (M+H) 460.1219, measured 460.1239.

**Ethyl (E)-2-((2-cyanophenoxy) methyl)-3-(3-((E)-3-methoxy-3-oxoprop-1-en-1-yl) phenyl)acrylate (4a)**

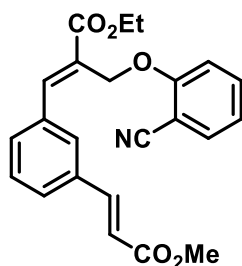

Pale yellow liquid; Yield (71%), <sup>1</sup>H NMR (400 MHz, CDCl<sub>3</sub>) δ 8.08 (s, 1H), 7.69 – 7.38 (m, 7H), 7.059 – 7.02 (m, 2H), 6.35 (d, *J* = 16.1 Hz, 1H), 4.95 (s, 2H), 4.33 (q, *J* = 7.1 Hz, 2H), 3.78 (s, 3H), 1.35 (t, *J* = 7.1 Hz, 3H). <sup>13</sup>C NMR (100 MHz, CDCl<sub>3</sub>) δ 167.29, 166.73, 160.22, 145.54, 144.03, 135.13, 135.07, 134.48, 134.08, 131.32, 129.57, 129.29, 129.10, 127.64, 121.57, 118.94, 116.42, 113.44, 102.80, 64.01, 61.71, 51.91, 14.38. HRMS (ESI): calc. for [(C<sub>23</sub>H<sub>21</sub>NO<sub>5</sub>)] (M+H) 392.1498, measured 392.1501.

**Ethyl (E)-2-((2-cyanophenoxy) methyl)-3-(3-((E)-3-ethoxy-3-oxoprop-1-en-1-yl) phenyl) acrylate (4b)**

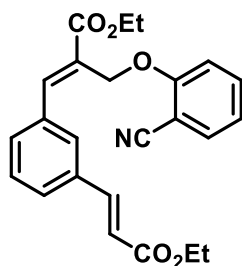

Yellow liquid; Yield (73%), <sup>1</sup>H NMR (400 MHz, CDCl<sub>3</sub>) δ 8.08 (s, 1H), 7.67 – 7.49 (m, 6H), 7.43 (t, *J* = 7.7 Hz, 1H), 7.13 – 7.00 (m, 2H), 6.33 (d, *J* = 16.1 Hz, 1H), 4.95 (s, 2H), 4.33 (q, *J* = 7.1 Hz, 2H), 4.24 (q, *J* = 7.1 Hz, 2H), 1.34 (dt, *J* = 13.5, 7.1 Hz, 6H). <sup>13</sup>C NMR (100 MHz, CDCl<sub>3</sub>) δ 166.86, 166.73, 160.21, 145.59, 143.74, 135.15, 135.11, 134.48, 134.09, 131.25, 129.56, 129.27, 129.09, 127.59, 121.57, 119.40, 116.41, 113.41, 102.79, 64.00, 61.71, 60.74, 14.43, 14.39. HRMS (ESI): calc. for [(C<sub>24</sub>H<sub>23</sub>NO<sub>5</sub>)] (M+H) 406.1654, measured 406.1625.

**Ethyl (E)-3-(3-((E)-3-(tert-butoxy)-3-oxoprop-1-en-1-yl) phenyl)-2-((2-cyanophenoxy) methyl) acrylate (4c)**

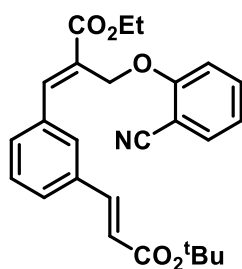

Brown liquid; Yield (67%),  $^1\text{H}$  NMR (400 MHz,  $\text{CDCl}_3$ )  $\delta$  8.07 (s, 1H), 7.60-7.50 (m, 6H), 7.42 (t,  $J = 7.7$  Hz, 1H), 7.10 – 7.01 (m, 2H), 6.28 (d,  $J = 16.1$  Hz, 1H), 4.94 (s, 2H), 4.33 (q,  $J = 7.1$  Hz, 2H), 1.51 (s, 9H), 1.35 (t,  $J = 7.1$  Hz, 3H).  $^{13}\text{C}$  NMR (100 MHz,  $\text{CDCl}_3$ )  $\delta$  166.77, 166.21, 160.22, 145.68, 142.71, 135.33, 135.04, 134.49, 134.05, 130.99, 129.89, 129.50, 129.17, 129.04, 128.58, 127.48, 126.70, 121.53, 121.29, 116.39, 113.39, 102.73, 80.86, 63.98, 61.69, 28.29, 14.37. HRMS (ESI): calc. for  $[(\text{C}_{26}\text{H}_{27}\text{NO}_5)]$  (M+H) 434.1967, measured 434.1963.

**Butyl (E)-2-((2-cyanophenoxy) methyl)-3-((E)-3-methoxy-3-oxoprop-1-en-1-yl)phenyl acrylate (4d)**

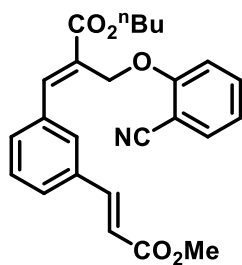

Yellow solid; Yield (71%), M.P (78 °C),  $^1\text{H}$  NMR (400 MHz,  $\text{CDCl}_3$ )  $\delta$  8.07 (s, 1H), 7.66 – 7.42 (m, 6H), 7.44 (t,  $J = 7.7$  Hz, 2H), 6.35 (d,  $J = 16.1$  Hz, 1H), 4.94 (s, 2H), , 4.27 (t,  $J = 6.6$  Hz, 2H), 3.78 (s, 3H), 1.78 – 1.63 (m, 2H), 1.41 (dd,  $J = 15.0, 7.4$  Hz, 2H), 1.30 – 1.18 (m, 3H).  $^{13}\text{C}$  NMR (100 MHz,  $\text{CDCl}_3$ )  $\delta$  167.29, 166.77, 160.20, 145.53, 144.03, 135.11, 135.04, 134.48, 134.07, 131.31, 129.56, 129.27, 129.10, 127.63, 121.54, 118.91, 116.38, 113.35, 102.74, 65.56, 64.00, 51.90, 30.77, 19.33, 13.84. HRMS (ESI): calc. for  $[(\text{C}_{25}\text{H}_{25}\text{NO}_5)]$  (M+H) 420.1811, measured 420.1808.

**Butyl (E)-2-((2-cyanophenoxy) methyl)-3-((E)-3-ethoxy-3-oxoprop-1-en-1-yl)phenyl acrylate (4e)**

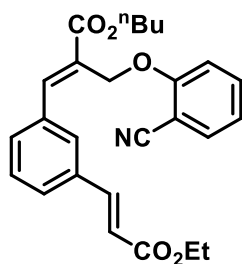

White solid; Yield (74%), M.P (96 °C),  $^1\text{H}$  NMR (400 MHz,  $\text{CDCl}_3$ )  $\delta$  8.07 (s, 1H), 7.68 – 7.49 (m, 6H), 7.45 (dd,  $J = 21.0, 13.3$  Hz, 1H), 7.09 – 7.01 (m, 2H), 6.34 (d,  $J = 16.0$  Hz, 1H), 4.94 (s, 2H), 4.30 – 4.19 (m, 4H), 1.69 (dd,  $J = 14.7, 6.9$  Hz, 2H), 1.42 (dd,  $J = 15.2, 7.4$  Hz, 2H), 1.32 (t,  $J = 7.1$  Hz, 3H), 0.94 (t,  $J = 7.4$  Hz, 3H).  $^{13}\text{C}$  NMR (100 MHz,  $\text{CDCl}_3$ )  $\delta$  166.82, 166.77, 160.20, 145.56, 143.71, 135.14, 135.10, 134.47, 134.09, 131.25, 129.55, 129.25, 129.09, 127.60, 121.54, 119.40, 116.38, 113.33, 102.76, 65.55, 64.00, 60.71, 30.78, 19.34, 14.42, 13.85. HRMS (ESI): calc. for  $[(\text{C}_{26}\text{H}_{27}\text{NO}_5)]$  (M+H) 434.1967, measured 434.1970.

**Butyl (E)-3-(3-((E)-3-(tert-butoxy)-3-oxoprop-1-en-1-yl)phenyl)-2-((2-cyanophenoxy)methyl)acrylate (4f)**

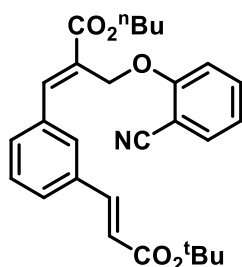

Colorless gummy liquid; Yield (68%),  $^1\text{H}$  NMR (400 MHz,  $\text{CDCl}_3$ )  $\delta$  8.06 (s, 1H), 7.64 – 7.48 (m, 6H), 7.41 (t,  $J = 7.7$  Hz, 1H), 7.14 – 6.99 (m, 2H), 6.34 – 6.17 (m, 1H), 4.93 (s, 2H), 4.26 (t,  $J = 6.4$  Hz, 2H), 1.70 (dd,  $J = 14.5, 7.4$  Hz, 2H), 1.51 (s, 9H), 1.41 (dd,  $J = 15.0, 7.5$  Hz, 2H), 0.94 (t,  $J = 7.4$  Hz, 3H).  $^{13}\text{C}$  NMR (100 MHz,  $\text{CDCl}_3$ )  $\delta$  166.73, 166.06, 160.18, 145.60, 142.62, 135.32, 135.01, 134.43, 134.02, 130.95, 129.90, 129.46, 129.13, 129.00, 127.49, 121.48, 121.30, 116.34, 113.30, 102.73, 80.74, 65.49, 63.97, 30.76, 28.26, 19.31, 13.83. HRMS (ESI): calc. for  $[(\text{C}_{28}\text{H}_{31}\text{NO}_5)]$  (M+H) 462.2280, measured 462.2285.

**Methyl (E)-2-((2-cyanophenoxy)methyl)-3-(5-((E)-3-ethoxy-3-oxoprop-1-en-1-yl)-2-methylphenyl)acrylate (4g)**

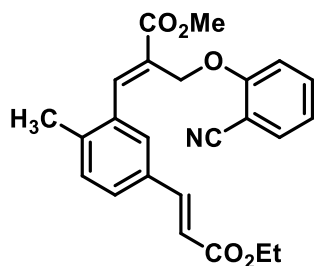

Yellow solid; Yield (68%), M.P (118 °C),  $^1\text{H}$  NMR (400 MHz,  $\text{CDCl}_3$ )  $\delta$  8.13 (s, 1H), 7.59 – 7.40(m, 6H), 7.24 (d,  $J = 8$  Hz, 1H), 7.03 – 6.89 (m, 1H), 6.92 (d,  $J = 8.4$  Hz, 1H), 6.21 (d,  $J = 16.0$  Hz, 1H), 4.84 (s, 2H), 4.21 (q,  $J = 7.1$  Hz, 2H), 3.89 (s, 3H), 2.33 (s, 3H), 1.31 (t,  $J = 7.1$  Hz, 3H);  $^{13}\text{C}$  NMR (100 MHz,  $\text{CDCl}_3$ )  $\delta$  166.95, 166.91, 160.03, 144.80, 143.68, 139.61,



134.37, 134.31, 134.10, 132.64, 130.96, 129.20, 128.38, 128.09, 121.43, 118.34, 116.32, 113.01, 102.68, 63.96, 60.54, 52.65, 20.14, 14.45; HRMS (ESI): calc. for  $[(C_{24}H_{23}NO_5)]$  (M+H) 406.1654, measured 406.1619.

**Methyl (*E*)-2-((2-cyanophenoxy)methyl)-3-(5-((*E*)-3-((2-ethylhexyl)oxy)-3-oxoprop-1-en-1-yl)-2-methylphenyl)acrylate (4h)**

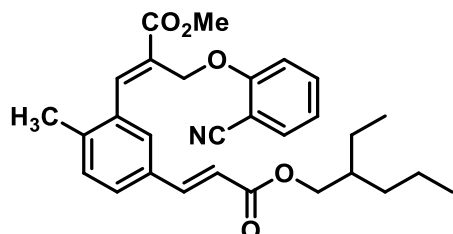

Colorless liquid; Yield (73%),  $^1H$  NMR (400 MHz,  $CDCl_3$ )  $\delta$  8.17 (s, 1H), 8.01 (d,  $J = 15.8$  Hz, 1H), 7.62 – 7.37 (m, 7H), 7.29 – 6.93 (m, 4H), 6.35 (d,  $J = 15.8$  Hz, 1H), 4.81 (s, 2H), 4.14 – 4.06 (m, 2H), 3.89 (s, 5H), 2.34 (d,  $J = 4.5$  Hz, 5H), 1.41- 0.89 (m, 29H).  $^{13}C$  NMR (100 MHz,  $CDCl_3$ )  $\delta$  167.13, 166.91, 160.32, 145.78, 144.81, 143.67, 142.04, 136.08, 134.83, 134.55, 134.35, 133.96, 130.95, 130.81, 129.25, 128.16, 127.76, 126.50, 121.43, 120.94, 118.38, 116.39, 113.36, 113.01, 102.80, 96.25, 67.29, 67.00, 64.22, 63.94, 52.63, 38.98, 30.65, 30.50, 29.82, 29.10, 24.02, 23.89, 23.13, 20.15, 16.54, 14.20, 11.20, 11.14, 1.16, 0.13; HRMS (ESI): calc. for  $[(C_{30}H_{35}NO_5)]$  (M+H), 476.2437 measured 476.2515.

**Methyl (*E*)-2-((2-cyanophenoxy)methyl)-3-(2-methyl-5-((*E*)-3-oxo-3-(((1*R*,2*R*,4*R*)-1,7,7-trimethylbicyclo[2.2.1]heptan-2-yl)oxy)prop-1-en-1-yl)phenyl)acrylate (4i)**

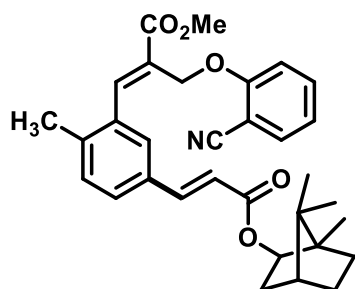

Colorless liquid; Yield (75%),  $^1H$  NMR (400 MHz,  $CDCl_3$ )  $\delta$  8.11 (s, 1H), 7.56- 7.41 (m, 5H), 7.24 (d,  $J = 7.9$  Hz, 1H), 7.00 (t,  $J = 7.6$  Hz, 1H), 6.91 (d,  $J = 8.5$  Hz, 1H), 6.25 (d,  $J = 16.0$  Hz, 1H), 4.83 (s, 2H), 4.74 (dd,  $J = 7.6, 3.8$  Hz, 1H), 3.88 (s, 3H), 2.33 (s, 3H), 1.88 – 1.64 (m, 5H), 1.64 – 1.49 (m, 1H), 1.32 – 1.04 (m, 3H), 1.00 (s, 3H), 0.84 (d,  $J = 1.8$  Hz, 6H).  $^{13}C$  NMR (100 MHz,  $CDCl_3$ )  $\delta$  166.87, 166.52, 160.05, 144.81, 143.40, 139.50, 134.33, 134.30, 134.03, 132.64, 130.91, 129.14, 128.36, 128.05, 121.40, 118.83, 116.25, 112.89, 102.56, 81.22, 63.88, 52.64, 48.95, 47.07, 45.14, 38.93, 33.84, 27.16, 20.25, 20.15, 11.62. HRMS (ESI): calc. for  $[(C_{32}H_{35}NO_5)]$  (M+H) 514.2593, measured 514.2515.

**Methyl (E)-2-((2-cyanophenoxy)methyl)-3-(2-methyl-5-((E)-2-(phenylsulfonyl)vinyl)phenyl)acrylate (4j)**

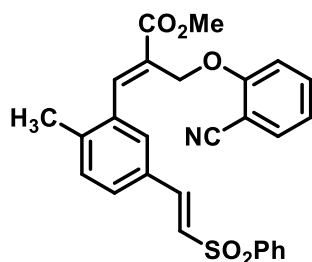

Yellow solid; Yield (54%), M.P (113 °C), <sup>1</sup>H NMR (400 MHz, CDCl<sub>3</sub>) δ 8.09 (s, 1H), 7.92 – 7.85 (m, 2H), 7.64 – 7.44 (m, 7H), 7.35 (dd, *J* = 7.9, 1.4 Hz, 1H), 7.24 (d, *J* = 8.0 Hz, 1H), 7.01 (t, *J* = 7.5 Hz, 1H), 6.94 (d, *J* = 8.5 Hz, 1H), 6.74 (d, *J* = 15.4 Hz, 1H), 4.79 (s, 2H), 3.87 (s, 3H), 2.32 (s, 3H). <sup>13</sup>C NMR (100 MHz, CDCl<sub>3</sub>) δ 166.72, 159.84, 144.62, 141.60, 140.66, 134.53, 134.46, 134.09, 133.41, 131.06, 130.51, 130.11, 129.35, 128.40, 128.23, 127.76, 127.24, 121.57, 116.46, 112.87, 102.29, 63.76, 52.66, 20.19. HRMS (ESI): calc. for [(C<sub>27</sub>H<sub>23</sub>NO<sub>5</sub>S) (M+H) 474.1375, measured 474.1366.

**Methyl (E)-2-((2-cyanophenoxy)methyl)-3-(2-methoxy-5-((E)-3-methoxy-3-oxoprop-1-en-1-yl)phenyl)acrylate (4k)**

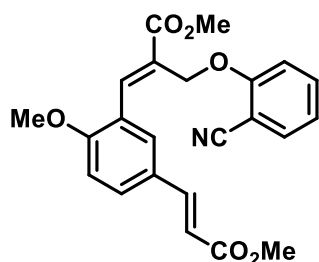

White solid; Yield (81%), M.P (99 °C), <sup>1</sup>H NMR (400 MHz, CDCl<sub>3</sub>) δ 8.20 (s, 1H), 7.66 – 7.45 (m, 5H), 7.03 (t, *J* = 8.3 Hz, 2H), 6.92 (d, *J* = 8.6 Hz, 1H), 6.08 (d, *J* = 16.0 Hz, 1H), 4.91 (s, 2H), 3.90 (s, 3H), 3.87 (s, 3H), 3.73 (s, 3H). <sup>13</sup>C NMR (100 MHz, CDCl<sub>3</sub>) δ 167.55, 167.16, 160.06, 159.43, 143.77, 141.87, 134.44, 134.15, 131.89, 129.76, 127.29, 127.11, 124.10, 121.42, 116.39, 113.07, 110.98, 102.64, 64.35, 55.98, 52.58, 51.68. HRMS (ESI): calc. for [(C<sub>23</sub>H<sub>21</sub>NO<sub>6</sub>) (M+H) 408.1472, measured 408.1447.

**Methyl (E)-2-((2-cyanophenoxy)methyl)-3-(5-((E)-3-ethoxy-3-oxoprop-1-en-1-yl)-2-methoxyphenyl)acrylate (4l)**

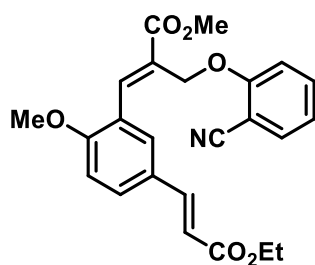

White solid; Yield (80%), M.P (150 °C),  $^1\text{H}$  NMR (400 MHz,  $\text{CDCl}_3$ )  $\delta$  8.21 (s, 1H), 7.70 – 7.41 (m, 5H), 7.03 (dd,  $J = 11.8, 4.3$  Hz, 2H), 6.92 (d,  $J = 8.6$  Hz, 1H), 6.06 (d,  $J = 16.0$  Hz, 1H), 4.91 (s, 2H), 4.19 (q,  $J = 7.1$  Hz, 2H), 3.91 (s, 3H), 3.88 (s, 3H), 1.30 (t,  $J = 8$  Hz, 3H).  $^{13}\text{C}$  NMR (100 MHz,  $\text{CDCl}_3$ )  $\delta$  167.47, 167.13, 160.07, 159.51, 146.13, 138.96, 134.49, 134.02, 133.33, 130.64, 126.79, 124.57, 123.83, 121.47, 119.65, 116.38, 113.29, 111.62, 102.59, 64.02, 60.43, 55.81, 52.47, 14.39. HRMS (ESI): calc. for  $[(\text{C}_{24}\text{H}_{23}\text{NO}_6)]$  (M+H) 422.1604, measured 422.1631.

**Methyl (E)-3-(5-((E)-3-(tert-butoxy)-3-oxoprop-1-en-1-yl)-2-methoxyphenyl)-2-((2-cyanophenoxy) methyl) acrylate (4m)**

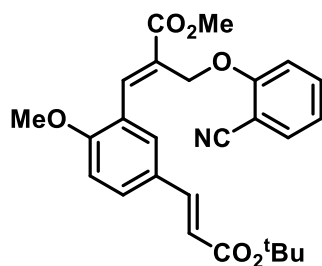

Colorless liquid; Yield (79%),  $^1\text{H}$  NMR (400 MHz,  $\text{CDCl}_3$ )  $\delta$  8.20 (s, 1H), 7.62 -7.39 (m, 5H), 7.03 - 6.89 (m, 3H), 6.02 (d,  $J = 16.0$  Hz, 1H), 4.89 (s, 2H), 3.89 (s, 3H), 3.86 (s, 3H), 1.48 (s, 9H);  $^{13}\text{C}$  NMR (100 MHz,  $\text{CDCl}_3$ )  $\delta$  167.15, 166.44, 160.03, 159.16, 142.44, 142.03, 134.42, 134.07, 131.67, 129.65, 127.51, 126.95, 123.97, 121.34, 118.73, 116.33, 112.97, 110.93, 102.55, 80.35, 64.26, 55.92, 52.53, 28.30; HRMS (ESI): calc. for  $[(\text{C}_{26}\text{H}_{27}\text{NO}_6)]$  (M+H) 450.1917, measured 450.1920.

**Methyl (E)-2-((2-cyanophenoxy) methyl)-3-(5-((E)-3-((7, 7-dimethyl bicyclo [2.2.1] heptan-2-yl)oxy)-3-oxoprop-1-en-1-yl)-2-methoxyphenyl)acrylate (4n)**

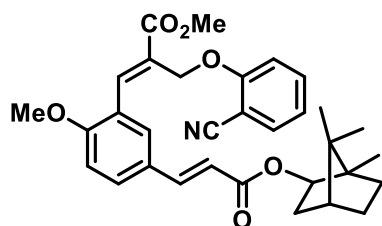

White color solid; Yield (87%), M.P. (88 °C),  $^1\text{H}$  NMR (400 MHz,  $\text{CDCl}_3$ )  $\delta$  8.18 (s, 1H), 7.63 (d,  $J = 1.2$  Hz, 1H), 7.57 -7.43 (m, 4H), 7.06 - 6.96 (m, 2H), 6.91 (d,  $J = 8.6$  Hz, 1H),

6.12 (d,  $J = 16.0$  Hz, 1H), 4.89 (s, 2H), 4.71 (dd,  $J = 7.4, 3.0$  Hz, 1H), 3.89 (s, 3H), 3.86 (s, 3H), 1.84 - 1.66 (m, 4H), 1.58 - 1.52 (m, 1H), 1.16 - 1.07 (m, 3H), 0.98 (s, 3H), 0.84 (s, 3H), 0.82 (s, 3H).  $^{13}\text{C}$  NMR (100 MHz,  $\text{CDCl}_3$ )  $\delta$  167.08, 166.65, 160.07, 159.28, 143.20, 141.88, 134.37, 134.03, 131.71, 129.77, 127.36, 127.01, 124.01, 121.37, 117.34, 116.26, 112.90, 110.95, 102.49, 81.10, 64.24, 55.93, 52.50, 48.92, 47.03, 45.14, 38.92, 33.83, 27.15, 20.23, 20.14, 11.59; HRMS (ESI): calc. for  $[(\text{C}_{32}\text{H}_{35}\text{NO}_6)]$  (M+H) 530.2543, measured 530.2504.

**Methyl (*E*)-2-((2-cyanophenoxy) methyl)-3-(5-((*E*)-3-((2-ethylhexyl)oxy)-3-oxoprop-1-en-1-yl)-2-methoxyphenyl)acrylate (4o)**

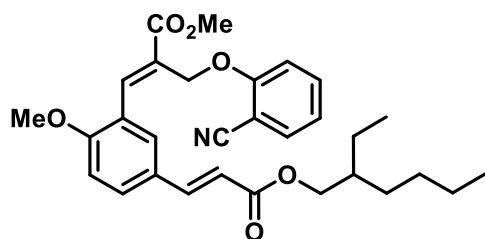

White solid; Yield (91%), M.P (92 °C),  $^1\text{H}$  NMR (400 MHz,  $\text{CDCl}_3$ )  $\delta$  8.19 (s, 1H), 7.65 (d,  $J = 1.9$  Hz, 1H), 7.59 - 7.43 (m, 4H), 7.01 (dd,  $J = 8.1, 5.2$  Hz, 2H), 6.91 (d,  $J = 8.6$  Hz, 1H), 6.10 (d,  $J = 16.0$  Hz, 1H), 4.90 (s, 2H), 4.04 (d,  $J = 6.3$  Hz, 2H), 3.89 (s, 3H), 3.86 (s, 3H), 1.51 - 1.17 (m, 8H), 1.00 - 0.80 (m, 6H).  $^{13}\text{C}$  NMR (100 MHz,  $\text{CDCl}_3$ )  $\delta$  167.36, 167.12, 160.02, 159.33, 143.46, 141.90, 134.39, 134.01, 131.89, 129.65, 127.30, 126.99, 124.02, 121.36, 116.78, 116.27, 112.97, 110.94, 102.52, 66.84, 64.25, 55.93, 52.52, 38.89, 30.43, 29.03, 23.82, 23.07, 14.18, 11.08; HRMS (ESI): calc. for  $[(\text{C}_{30}\text{H}_{35}\text{NO}_6)]$  (M+H) 506.2543, measured 506.2549.

**Methyl(*E*)-2-((2-cyanophenoxy)methyl)-3-(2-methoxy-5-((*E*)-2(phenylsulfonyl) vinyl) phenyl)acrylate (4p)**

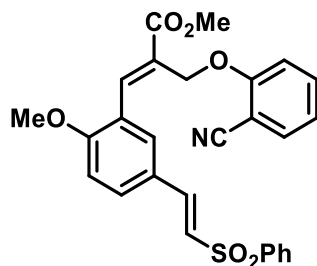

Yellow solid; Yield (72%), M.P (165 °C),  $^1\text{H}$  NMR (400 MHz,  $\text{CDCl}_3$ )  $\delta$  8.16 (s, 1H), 7.94 - 7.82 (m, 2H), 7.65 (d,  $J = 1.7$  Hz, 1H), 7.60 - 7.40 (m, 6H), 7.07 - 6.97 (m, 2H), 6.91 (d,  $J = 8.6$  Hz, 1H), 6.56 (d,  $J = 15.4$  Hz, 1H), 4.86 (s, 2H), 3.89 (s, 3H), 3.85 (s, 3H).  $^{13}\text{C}$  NMR (100 MHz,  $\text{CDCl}_3$ )  $\delta$  167.00, 160.01, 159.88, 141.78, 141.59, 140.97, 134.54, 134.13, 133.30, 132.94, 129.86, 129.32, 127.70, 127.28, 125.64, 125.23, 124.36, 121.63, 116.49, 112.99,

111.04, 102.32, 64.14, 56.04, 52.59. HRMS (ESI): calc. for [(C<sub>27</sub>H<sub>23</sub>NO<sub>6</sub>S)] (M+H) 490.1324, measured 490.1332.

**Ethyl (E)-3-(5-((E)-3-(tert-butoxy)-3-oxoprop-1-en-1-yl)-2-methoxyphenyl)-2-((2-cyanophenoxy)methyl)acrylate (4q)**

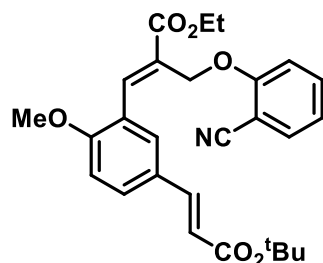

Yellow liquid; Yield (82%), <sup>1</sup>H NMR (400 MHz, CDCl<sub>3</sub>) δ 8.18 (s, 1H), 7.65 – 7.38 (m, 6H), 7.02 (dd, *J* = 11.5, 4.4 Hz, 2H), 6.91 (d, *J* = 8.6 Hz, 1H), 6.04 (d, *J* = 16.0 Hz, 1H), 4.90 (s, 2H), 4.33 (q, *J* = 7.1 Hz, 2H), 3.90 (s, 3H), 1.48 (s, 9H), 1.38 – 1.35 (m, 3H); <sup>13</sup>C NMR (100 MHz, CDCl<sub>3</sub>) δ 166.71, 166.51, 160.13, 159.16, 142.51, 141.68, 134.40, 134.08, 131.55, 129.77, 127.53, 127.38, 124.10, 121.30, 118.74, 116.37, 113.01, 110.93, 102.57, 80.40, 64.32, 61.55, 55.93, 28.33, 14.40. HRMS (ESI): calc. for [(C<sub>27</sub>H<sub>29</sub>NO<sub>6</sub>)] (M+H) 464.2073, measured 464.2054.

**Ethyl(E)-2-((2-cyanophenoxy)methyl)-3-(2-methoxy-5-((E)-2-(phenylsulfonyl) vinyl)phenyl)acrylate (4r)**

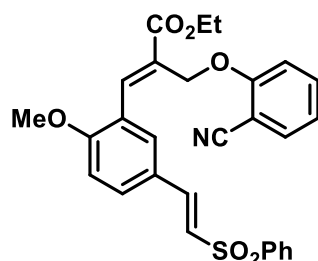

White solid; Yield (72%), M.P (140 °C), <sup>1</sup>H NMR (400 MHz, CDCl<sub>3</sub>) δ 8.14 (s, 1H), 7.93 – 7.80 (m, 2H), 7.67 – 7.43 (m, 7H), 7.02 (d, *J* = 8.0 Hz, 1H), 6.91 (d, *J* = 8.6 Hz, 1H), 6.62 – 6.52 (m, 1H), 4.86 (s, 2H), 4.30 (q, *J* = 7.1 Hz, 2H), 3.89 (s, 3H), 1.33 (t, *J* = 7.1 Hz, 3H); <sup>13</sup>C NMR (100 MHz, CDCl<sub>3</sub>) δ 166.49, 159.97, 159.93, 141.61, 141.41, 140.95, 134.50, 134.07, 133.27, 132.82, 129.89, 129.58, 129.30, 128.06, 127.67, 127.63, 125.58, 125.17, 124.43, 121.54, 116.49, 112.99, 111.02, 102.27, 64.15, 61.55, 56.01, 14.33; HRMS (ESI): calc. for [(C<sub>28</sub>H<sub>25</sub>NO<sub>6</sub>S)] (M+H) 504.1481, measured 504.1491.

**Methyl (E)-2-((2-cyanophenoxy)methyl)-3-(2-fluoro-5-((E)-2-(phenylsulfonyl)vinyl)phenyl)acrylate (4s)**

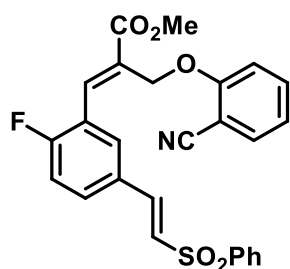

White solid; Yield (45%), M.P (1389 °C),  $^1\text{H}$  NMR (400 MHz,  $\text{CDCl}_3$ )  $\delta$  8.07 (s, 1H), 7.89 (dd,  $J = 8.4, 1.3$  Hz, 2H), 7.74 (dd,  $J = 7.1, 2.4$  Hz, 1H), 7.64 – 7.49 (m, 8H), 7.18 – 7.11 (m, 1H), 7.10 – 7.01 (m, 2H), 6.69 (d,  $J = 15.4$  Hz, 1H), 4.91 (s, 2H), 3.88 (s, 3H).  $^{13}\text{C}$  NMR (100 MHz,  $\text{CDCl}_3$ )  $\delta$  166.52, 159.71, 142.78, 140.46, 138.36, 138.08, 135.50, 134.62, 134.50, 134.15, 133.65, 133.60, 131.28, 129.45, 128.71, 127.89, 123.92, 121.87, 116.39, 116.08, 113.06, 102.42, 63.8, 52.87. HRMS (ESI): calc. for  $[(\text{C}_{26}\text{H}_{20}\text{FNO}_5\text{S})]$  (M+H) 478.1124, measured 478.1138.

**Methyl (E)-3-(2-chloro-5-((E)-3-methoxy-3-oxoprop-1-en-1-yl)phenyl)-2-((2-cyanophenoxy)methyl)acrylate (4t)**

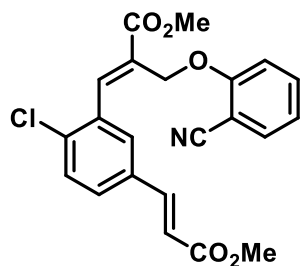

White solid; Yield (67%), M.P (169 °C),  $^1\text{H}$  NMR (400 MHz,  $\text{CDCl}_3$ )  $\delta$  8.16 (s, 1H), 8.11 (d,  $J = 16.0$  Hz, 1H), 7.65 – 7.50 (m, 4H), 7.33 (t,  $J = 7.8$  Hz, 1H), 7.04 (dd,  $J = 8.0, 2.2$  Hz, 2H), 6.43 (d,  $J = 16.0$  Hz, 1H), 4.84 (s, 2H), 3.89 (s, 3H), 3.83 (s, 3H);  $^{13}\text{C}$  NMR (100 MHz,  $\text{CDCl}_3$ )  $\delta$  166.86, 166.68, 160.20, 143.34, 140.37, 134.47, 134.34, 133.94, 133.73, 132.25, 128.72, 128.64, 127.38, 121.68, 121.62, 116.40, 113.63, 102.85, 64.42, 52.77, 52.09; HRMS (ESI): calc. for  $[(\text{C}_{22}\text{H}_{18}\text{ClNO}_5)]$  (M+H) 412.0952, measured 412.0961.

**Methyl (E)-2-((2-cyanophenoxy)methyl)-3-(3-((E)-3-ethoxy-3-oxoprop-1-en-1-yl)-4-methylphenyl)acrylate (4u)**

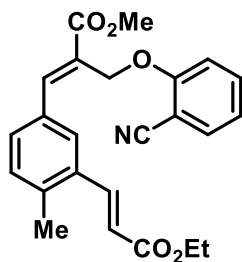

Colorless liquid; Yield (71%),  $^1\text{H}$  NMR (400 MHz,  $\text{CDCl}_3$ )  $\delta$  8.08 (s, 1H), 7.89 (d,  $J = 8$  Hz, 1H), 7.65 – 7.41 (m, 6H), 7.09 – 6.94 (m, 4H), 6.16 (d,  $J = 15.9$  Hz, 1H), 4.95 (s, 2H), 4.23 (q,  $J = 7.1$  Hz, 2H), 3.87 (s, 3H), 2.43 (s, 3H), 1.32 (t,  $J = 7.1$  Hz, 3H).  $^{13}\text{C}$  NMR (100 MHz,  $\text{CDCl}_3$ )  $\delta$  167.45, 167.02, 160.11, 158.74, 146.40, 141.55, 139.80, 134.66, 134.56, 134.16, 134.07, 133.05, 132.50, 131.52, 131.14, 127.81, 126.19, 121.51, 120.91, 120.27, 116.60, 113.17, 102.64, 63.97, 60.75, 52.67, 19.88, 14.45; HRMS (ESI): calc. for  $[(\text{C}_{24}\text{H}_{23}\text{NO}_5)]$  (M+H) 406.1654, measured 406.1663.

**Methyl (*E*)-2-((2-cyanophenoxy)methyl)-3-(4-ethyl-3-((*E*)-3-methoxy-3-oxoprop-1-en-1-yl) phenyl)acrylate (4v)**

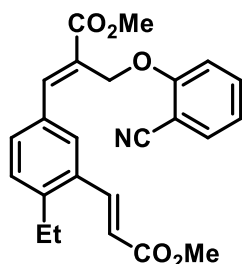

White solid; Yield (69%), M.P (95 °C),  $^1\text{H}$  NMR (400 MHz,  $\text{CDCl}_3$ )  $\delta$  8.08 (s, 1H), 7.93 (d,  $J = 15.9$  Hz, 1H), 7.66 – 7.37 (m, 8H), 7.28 (s, 1H), 7.11 – 6.89 (m, 4H), 6.17 (d,  $J = 15.8$  Hz, 1H), 4.95 (s, 2H), 3.87 (s, 3H), 3.77 (s, 3H), 2.77 (q,  $J = 7.6$  Hz, 2H), 1.20 (t,  $J = 7.6$  Hz, 3H);  $^{13}\text{C}$  NMR (100 MHz,  $\text{CDCl}_3$ )  $\delta$  167.42, 167.33, 160.10, 158.89, 146.32, 145.83, 141.60, 134.53, 134.13, 133.37, 133.08, 132.46, 131.41, 129.95, 128.02, 126.21, 121.46, 120.73, 120.01, 116.54, 116.38, 113.17, 102.66, 63.97, 52.63, 51.84, 26.40, 15.60; HRMS (ESI): calc. for  $[(\text{C}_{24}\text{H}_{23}\text{NO}_5)]$  (M+H) 406.1654, measured 406.1664.

**Methyl (*E*)-2-((2-cyanophenoxy) methyl)-3-(3-((*E*)-3-ethoxy-3-oxoprop-1-en-1-yl)-4-methoxyphenyl)acrylate (4w)**

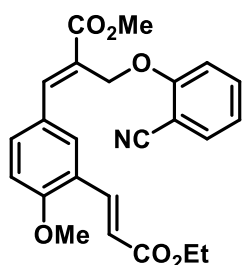

White solid; Yield (81%), M.P (97 °C),  $^1\text{H}$  NMR (400 MHz,  $\text{CDCl}_3$ )  $\delta$  8.01 (s, 1H), 7.87 (d,  $J = 16.2$  Hz, 1H), 7.63 – 7.48 (m, 4H), 7.12 (d,  $J = 8.5$  Hz, 1H), 7.04 (dd,  $J = 11.1, 4.0$  Hz, 1H), 6.94 (d,  $J = 8.5$  Hz, 1H), 6.31 (d,  $J = 16.2$  Hz, 1H), 4.96 (s, 2H), 4.20 (q,  $J = 7.1$  Hz, 2H), 3.88 (s, 3H), 3.84 (s, 3H), 1.29 (t,  $J = 7.1$  Hz, 3H);  $^{13}\text{C}$  NMR (100 MHz,  $\text{CDCl}_3$ )  $\delta$  167.47, 167.13, 160.07, 159.51, 146.13, 138.96, 134.49, 134.02, 133.33, 130.64, 126.79, 124.57,

123.83, 121.47, 119.65, 116.38, 113.29, 111.62, 102.59, 64.02, 60.43, 55.81, 52.47, 14.39; HRMS (ESI): calc. for [(C<sub>24</sub>H<sub>23</sub>NO<sub>6</sub>)] (M+H) 422.1604, measured 422.1594.

**Methyl (E)-2-((2-cyanophenoxy) methyl)-3-(7-((E)-3-methoxy-3-oxoprop-1-en-1-yl) benzo[d][1,3]dioxol-5-yl)acrylate (4x)**

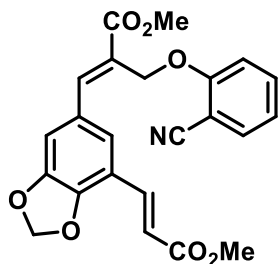

Brown solid; Yield (82%), M.P (115 °C), <sup>1</sup>H NMR (400 MHz, CDCl<sub>3</sub>) δ 7.96 (s, 1H), 7.68 – 7.45 (m, 4H), 7.26 – 6.98 (m, 5H), 6.55 (d, *J* = 16.1 Hz, 1H), 6.10 (s, 2H), 4.98 (s, 2H), 3.85 (s, 3H), 3.77 (s, 3H); <sup>13</sup>C NMR (100 MHz, CDCl<sub>3</sub>) δ 167.41, 167.38, 160.11, 148.89, 148.15, 145.93, 138.41, 134.48, 134.05, 128.51, 125.79, 125.30, 121.57, 121.48, 117.34, 116.40, 113.46, 110.48, 102.77, 102.46, 63.90, 52.59, 51.87; HRMS (ESI): calc. for [(C<sub>23</sub>H<sub>19</sub>NO<sub>7</sub>)] (M+H) 422.1240, measured 422.1243.

**Methyl (E)-2-((2-cyanophenoxy) methyl)-3-(7-((E)-3-ethoxy-3-oxoprop-1-en-1-yl) benzo[d][1,3]dioxol-5-yl)acrylate (4y)**

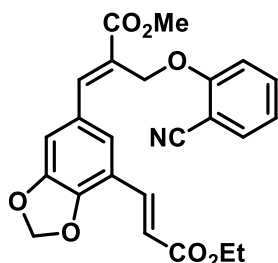

White r solid; Yield (79%), M.P (87 °C), <sup>1</sup>H NMR (400 MHz, CDCl<sub>3</sub>) δ 7.96 (s, 1H), 7.55- 7.49 (m, 3H), 7.14 – 7.02 (m, 4H), 6.54 (d, *J* = 16.1 Hz, 1H), 6.10 (s, 2H), 4.98 (s, 2H), 4.23 (q, *J* = 7.2 Hz, 2H), 3.84 (s, 3H), 1.31 (t, *J* = 9.4, Hz, 3H); <sup>13</sup>C NMR (100 MHz, CDCl<sub>3</sub>) δ 167.40, 166.93, 160.08, 148.86, 148.11, 145.96, 138.12, 134.47, 134.03, 128.47, 125.80, 125.23, 121.95, 121.55, 117.39, 116.38, 113.42, 110.41, 102.73, 102.44, 63.87, 60.67, 52.58, 14.39; HRMS (ESI): calc. for [(C<sub>24</sub>H<sub>21</sub>NO<sub>7</sub>)] (M+H) 436.1396, measured 436.1420.

**Methyl (E)-3-(7-((E)-3-(tert-butoxy)-3-oxoprop-1-en-1-yl) benzo[d][1,3]dioxol-5-yl)-2-((2-cyanophenoxy)methyl)acrylate (4z)**



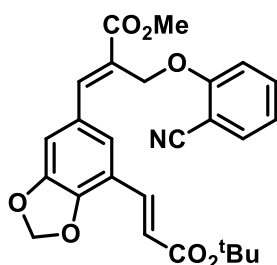

White solid; Yield (78%), M.P (114 °C),  $^1\text{H}$  NMR (400 MHz,  $\text{CDCl}_3$ )  $\delta$  7.98 (s, 1H), 7.62 – 7.51 (m, 2H), 7.44 (d,  $J = 16.1$  Hz, 1H), 7.15 – 7.03 (m, 4H), 6.50 (d,  $J = 16.1$  Hz, 1H), 6.11 (s, 2H), 4.99 (s, 2H), 3.86 (s, 3H), 1.51 (s, 9H);  $^{13}\text{C}$  NMR (100 MHz,  $\text{CDCl}_3$ )  $\delta$  167.46, 166.26, 160.13, 148.85, 148.03, 146.10, 137.13, 134.48, 134.05, 128.46, 125.88, 125.14, 123.94, 121.54, 117.62, 113.41, 110.20, 102.76, 102.39, 80.77, 63.87, 52.60, 28.29; HRMS (ESI): calc. for  $[(\text{C}_{26}\text{H}_{26}\text{NO}_7)]$  (M+Na) 486.1529, measured 486.1513.

**Methyl (E)-2-((2-cyanophenoxy)methyl)-3-(4-fluoro-3-((E)-3-methoxy-3-oxoprop-1-en-1-yl)phenyl)acrylate (4aa)**

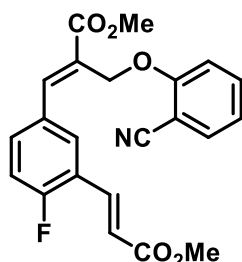

White solid; Yield (68%), M.P (137 °C),  $^1\text{H}$  NMR (400 MHz,  $\text{CDCl}_3$ )  $\delta$  7.75 (d,  $J = 16.2$  Hz, 1H), 7.68 (dd,  $J = 6.9, 2.1$  Hz, 1H), 7.65 – 7.46 (m, 6H), 7.21 – 7.02 (m, 6H), 6.39 (d,  $J = 16.2$  Hz, 1H), 4.94 (s, 2H), 3.88 (s, H), 3.79 (s, 3H);  $^{13}\text{C}$  NMR (100 MHz,  $\text{CDCl}_3$ )  $\delta$  167.38, 167.11, 167.00, 160.69, 160.30, 160.01, 145.80, 145.07, 136.57, 134.56, 134.50, 134.14, 134.02, 133.18, 133.09, 132.05, 131.97, 130.91, 130.52, 126.98, 126.05, 123.09, 121.74, 121.62, 121.47, 117.21, 116.98, 116.45, 116.36, 116.28, 116.06, 113.64, 113.38, 102.91, 102.82, 96.25, 64.15, 63.86, 52.74, 52.63, 51.98; HRMS (ESI): calc. for  $[(\text{C}_{22}\text{H}_{18}\text{FNO}_5)]$  (M+H) 396.1247, measured 396.1259.

**Methyl (E)-3-(4-chloro-3-((E)-3-methoxy-3-oxoprop-1-en-1-yl)phenyl)-2-((2-cyanophenoxy)methyl)acrylate (4ab)**

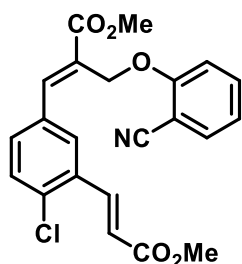

White solid; Yield (67%), M.P (117 °C)  $^1\text{H}$  NMR (400 MHz,  $\text{CDCl}_3$ )  $\delta$  8.05 (s, 1H), 8.01 (d,  $J = 16.1$  Hz, 1H), 7.72 (s, 1H), 7.61 – 7.44 (m, 5H), 7.09 – 7.04 (m, 2H), 7.01 – 6.92 (m, 2H), 6.24 (d,  $J = 16.0$  Hz, 1H), 4.92 (s, 2H), 3.88 (s, 3H), 3.78 (s, 3H);  $^{13}\text{C}$  NMR (100 MHz,  $\text{CDCl}_3$ )  $\delta$  167.08, 166.83, 159.92, 158.75, 145.05, 139.98, 136.53, 134.68, 134.64, 134.18, 133.38, 133.30, 133.06, 131.98, 130.84, 128.78, 127.52, 121.74, 121.38, 120.92, 116.62, 113.20, 102.66, 99.88, 63.75, 52.82, 52.05. HRMS (ESI): calc. for  $[(\text{C}_{22}\text{H}_{18}\text{ClNO}_5)]$  (M+H) 412.0952, measured 412.0962.

**Methyl (E)-3-(4-chloro-3-((E)-3-ethoxy-3-oxoprop-1-en-1-yl) phenyl)-2-((2-cyanophenoxy) methyl) acrylate (4ac)**

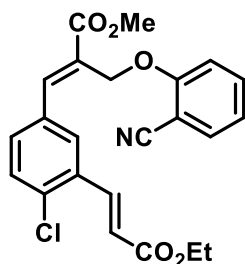

White solid; Yield (70%), M.P(123 °C),  $^1\text{H}$  NMR (400 MHz,  $\text{CDCl}_3$ )  $\delta$  8.05 (s, 1H), 8.00 (d,  $J = 16.0$  Hz, 1H), 7.73 (d,  $J = 1.2$  Hz, 1H), 7.61 – 7.47 (m, 4H), 7.10 – 7.05 (m, 2H), 6.23 (d,  $J = 16.0$  Hz, 1H), 4.92 (s, 2H), 4.24 (q,  $J = 7.1$  Hz, 2H), 3.88 (s, 3H), 1.33 (t,  $J = 7.1$  Hz, 3H);  $^{13}\text{C}$  NMR (100 MHz,  $\text{CDCl}_3$ )  $\delta$  166.95, 166.24, 159.89, 144.99, 139.57, 136.45, 134.55, 134.16, 133.36, 133.35, 131.86, 130.80, 128.75, 127.48, 121.86, 121.71, 116.28, 113.16, 102.71, 63.72, 60.82, 52.75, 14.41; HRMS (ESI): calc. for  $[(\text{C}_{23}\text{H}_{20}\text{ClNO}_5)]$  (M+H) 426.1108, measured 426.1096.

**Methyl (E)-3-(4-chloro-3-((E)-2-(phenylsulfonyl) vinyl) phenyl)-2-((2-cyanophenoxy) methyl) acrylate (4ad)**

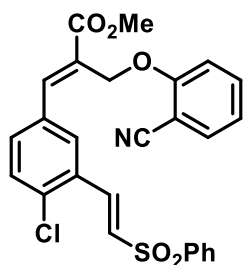

White solid; Yield (54%), M.P(110 °C),  $^1\text{H}$  NMR (400 MHz,  $\text{CDCl}_3$ )  $\delta$  8.03 (s, 1H), 7.99 (s, 1H), 7.91 – 7.84 (m, 1H), 7.71 – 7.42 (m, 4H), 7.13 – 6.99 (m, 1H), 6.79 (dd,  $J = 15.4, 1.7$  Hz, 1H), 6.46 (d,  $J = 16.5$  Hz, 1H), 6.04 (d,  $J = 9.8$  Hz, 1H), 4.87 (s, 2H), 3.85 (s, 3H).  $^{13}\text{C}$  NMR (100 MHz,  $\text{CDCl}_3$ )  $\delta$  166.78, 159.77, 144.56, 140.14, 137.53, 136.79, 134.61, 134.18, 133.73, 133.56, 132.72, 131.35, 131.01, 129.60, 129.50, 129.12, 128.10, 127.98, 127.87,

121.86, 116.35, 113.14, 102.52, 63.55, 52.76. HRMS (ESI): calc. for [(C<sub>26</sub>H<sub>20</sub>ClNO<sub>5</sub>S)] (M+H) 494.0829, measured 494.0911.

**Methyl (E)-3-(4-bromo-3-((E)-3-methoxy-3-oxoprop-1-en-1-yl)phenyl)-2-((2-cyanophenoxy)methyl) acrylate (4ae)**

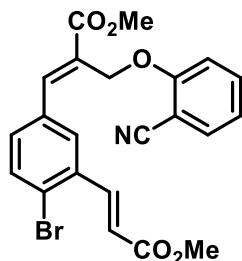

White solid; Yield (43%), M.P (152 °C), <sup>1</sup>H NMR (400 MHz, CDCl<sub>3</sub>) δ 8.02 (s, 1H), 7.96 (d, *J* = 16.0 Hz, 1H), 7.67 (dd, *J* = 13.1, 5.2 Hz, 2H), 7.61 – 7.50 (m, 2H), 7.39 (dd, *J* = 8.3, 2.0 Hz, 1H), 7.09 – 7.06 (m, 2H), 6.19 (d, *J* = 16.0 Hz, 1H), 4.91 (s, 2H), 3.87 (s, 3H), 3.77 (s, 3H). <sup>13</sup>C NMR (100 MHz, CDCl<sub>3</sub>) δ 166.93, 166.55, 159.88, 144.97, 142.39, 135.15, 134.55, 134.14, 134.08, 133.98, 131.97, 128.78, 127.61, 126.91, 121.70, 121.57, 116.28, 113.18, 102.73, 63.73, 52.75, 51.96. HRMS (ESI): calc. for [(C<sub>22</sub>H<sub>18</sub>BrNO<sub>5</sub>)] (M+H) 456.0447, measured 456.0408.

**Dimethyl 3,3'-(4-((E)-2-((2-cyanophenoxy)methyl)-3-methoxy-3-oxoprop-1-en-1-yl)-1,2-phenylene)(2E,2'E) diacrylate (4ae')**

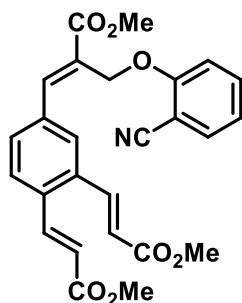

White solid; Yield (27%), M.P(183 °C), <sup>1</sup>H NMR (400 MHz, CDCl<sub>3</sub>) δ 8.08 – 8.00 (m, 3H), 7.67 (s, 2H), 7.63 – 7.51 (m, 2H), 7.27 (s, 1H), 7.10 – 7.03 (m, 2H), 6.18 (d, *J* = 15.9 Hz, 2H), 4.91 (s, 2H), 3.89 (s, 3H), 3.79 (s, 6H). <sup>13</sup>C NMR (100 MHz, CDCl<sub>3</sub>) δ 166.74, 166.41, 159.57, 144.49, 142.78, 136.87, 134.62, 134.32, 134.03, 129.60, 128.73, 128.27, 122.48, 121.73, 116.18, 112.72, 102.59, 63.40, 52.87, 52.08. HRMS (ESI): calc. for [(C<sub>26</sub>H<sub>23</sub>NO<sub>7</sub>)] (M+H) 462.1553, measured 462.1574.

**Methyl (E)-3-(2-bromo-5-((E)-3-methoxy-3-oxoprop-1-en-1-yl)phenyl)-2-((2-cyanophenoxy)methyl)acrylate (4af)**

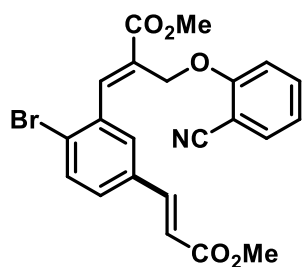

White solid; Yield (38%), M.P (146 °C),  $^1\text{H}$  NMR (400 MHz,  $\text{CDCl}_3$ )  $\delta$  8.09 (d,  $J = 16.9$  Hz, 1H), 7.6 – 7.48 (m, 4H), 7.38 (t,  $J = 7.7$  Hz, 1H), 7.04 (dd,  $J = 11.1, 4.5$  Hz, 2H), 6.39 (d,  $J = 15.9$  Hz, 1H), 4.83 (s, 2H), 3.90 (s, 3H), 3.83 (s, 3H).  $^{13}\text{C}$  NMR (100 MHz,  $\text{CDCl}_3$ )  $\delta$  166.78, 166.67, 160.20, 145.56, 143.08, 136.42, 135.70, 134.47, 133.95, 132.17, 128.60, 128.34, 128.05, 126.40, 121.82, 121.66, 113.60, 102.84, 64.39, 52.79, 52.11. HRMS (ESI): calc. for  $[(\text{C}_{22}\text{H}_{18}\text{BrNO}_5)]$  (M+H) 456.0447, measured 456.0417.

**Dimethyl 3,3'-(2-((*E*)-2-((2-cyanophenoxy)methyl)-3-methoxy-3-oxoprop-1-en-1-yl)-1,4-phenylene)(2*E*,2'*E*)-diacrylate.**

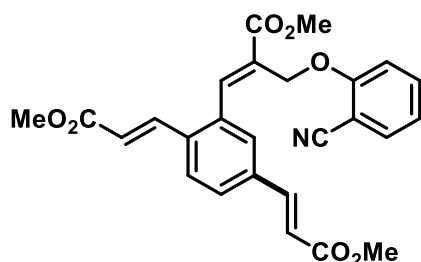

White solid; Yield (23%), M.P (162 °C),  $^1\text{H}$  NMR (400 MHz,  $\text{CDCl}_3$ )  $\delta$  8.09 (s, 1H), 8.06 (d,  $J = 15.9$  Hz, 1H), 7.70 – 7.47 (m, 6H), 7.05 – 6.97 (m, 2H), 6.41 (d,  $J = 15.9$  Hz, 1H), 6.33 (d,  $J = 16.0$  Hz, 1H), 4.84 (s, 2H), 3.91 (s, 3H), 3.84 (s, 3H), 3.78 (s, 3H).  $^{13}\text{C}$  NMR (100 MHz,  $\text{CDCl}_3$ )  $\delta$  166.80, 166.52, 166.42, 159.81, 144.76, 142.47, 142.18, 137.11, 136.46, 134.49, 134.38, 134.09, 130.22, 129.05, 127.90, 127.61, 122.60, 121.69, 120.39, 116.27, 113.06, 102.67, 77.48, 77.16, 76.84, 63.95, 52.89, 52.20, 52.01. HRMS (ESI): calc. for  $[(\text{C}_{26}\text{H}_{23}\text{NO}_7)]$  (M+Na) 484.1372, measured 484.1366.

**Ethyl (*E*)-2-((2-cyanophenoxy) methyl)-3-(3-((*E*)-3-oxo-1-phenylprop-1-en-1-yl)phenyl) acrylate (5a)**

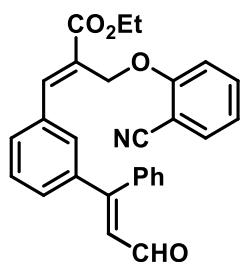

Brown gummy liquid; Yield (63%), (*E/Z* = 82/18), <sup>1</sup>H NMR (400 MHz, CDCl<sub>3</sub>) δ 9.46 (d, *J* = 7.9 Hz, 1H), 8.02 (s, 1H), 7.65 – 7.28 (m, 6H), 7.22 (dd, *J* = 7.7, 1.7 Hz, 8H), 7.12 – 6.98 (m, 5H), 6.50 (d, *J* = 7.9 Hz, 1H), 4.87 (s, 2H), 4.30 (q, *J* = 7.1 Hz, 3H), 1.33 (t, *J* = 7.1 Hz, 4H). <sup>13</sup>C NMR (100 MHz, CDCl<sub>3</sub>) δ 193.39, 166.65, 161.52, 160.15, 145.28, 140.59, 136.24, 134.85, 134.41, 134.10, 131.69, 130.79, 130.67, 129.98, 129.75, 129.71, 129.37, 128.82, 128.66, 128.52, 127.93, 127.49, 121.48, 116.58, 113.12, 102.73, 77.48, 77.16, 76.85, 63.80, 61.70, 14.36. HRMS (ESI): calc. for [(C<sub>28</sub>H<sub>23</sub>NO<sub>4</sub>)] (M+H) 438.1705, measured 438.1709.

**Butyl (*E*)-2-((2-cyanophenoxy)methyl)-3-(3-((*E*)-3-oxo-1-phenylprop-1-en-1-yl)phenyl)acrylate (5b)**

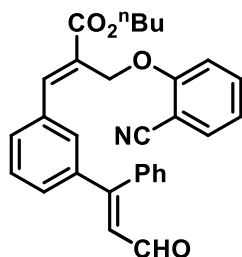

Yellow liquid; yield (68%), (*E/Z* = 79/21), <sup>1</sup>H NMR (400 MHz, CDCl<sub>3</sub>) δ 9.46 (d, *J* = 7.9 Hz, 1H), 8.03 (s, 1H), 7.42 (m, 12H), 7.10 – 6.97 (m, 3H), 6.50 (d, *J* = 7.9 Hz, 1H), 4.87 (s, 2H), 4.25 (t, *J* = 6.5 Hz, 3H), 1.73 – 1.61 (m, 3H), 1.44 – 1.34 (m, 3H), 0.92 (t, *J* = 7.4 Hz, 4H); <sup>13</sup>C NMR (100 MHz, CDCl<sub>3</sub>) δ 193.41, 166.69, 161.58, 160.11, 145.27, 140.55, 136.20, 134.82, 134.44, 134.39, 134.07, 131.71, 130.77, 130.63, 129.94, 129.73, 129.69, 129.34, 128.79, 128.63, 128.49, 127.88, 127.47, 121.44, 116.24, 113.01, 102.65, 65.53, 63.79, 30.72, 19.28, 13.81. HRMS (ESI): calc. for [(C<sub>30</sub>H<sub>27</sub>NO<sub>4</sub>)] (M+H) 466.2018, measured 466.2032.

**Methyl (*E*)-2-((2-cyanophenoxy)methyl)-3-(7-((*Z*)-3-oxo-1-phenylprop-1-en-1-yl)benzo[d][1,3]dioxol-5-yl)acrylate (5c)**

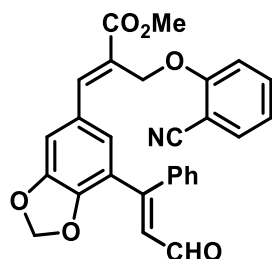

Brown solid; Yield (71%), M.P (99 °C), (*E/Z* = 75/25), <sup>1</sup>H NMR (400 MHz, CDCl<sub>3</sub>) δ 7.82 (s, 1H), 7.59 – 7.47 (m, 4H), 7.42 – 7.28 (m, 7H), 7.22 (dd, *J* = 6.2, 3.2 Hz, 3H), 7.11 (d, *J* = 1.2 Hz, 1H), 7.05 (dd, *J* = 13.2, 5.7 Hz, 2H), 6.99 (d, *J* = 8.5 Hz, 1H), 6.88 (dd, *J* = 8.7, 4.4 Hz, 1H), 6.66 (d, *J* = 0.9 Hz, 1H), 6.11 (s, 2H), 4.85 (s, 2H), 3.79 (s, 3H); <sup>13</sup>C NMR (100 MHz, CDCl<sub>3</sub>) δ 193.94, 167.26, 160.05, 155.84, 148.91, 147.94, 145.46, 135.35, 134.42, 134.32, 133.94, 130.71, 130.31, 130.21, 129.49, 129.01, 128.85, 128.49, 128.42, 128.36,

128.18, 128.04, 126.37, 125.09, 121.67, 121.37, 116.22, 113.10, 110.92, 102.67, 102.28, 63.63, 52.50, 29.75; HRMS (ESI): calc. for [(C<sub>28</sub>H<sub>21</sub>NO<sub>6</sub>)] (M+H) 468.1447, measured 468.1446.

**Methyl (*E*)-2-((2-cyanophenoxy)methyl)-3-(2-methoxy-5-((*Z*)-3-oxo-1-phenylprop-1-en-1-yl)phenyl)acrylate (5d)**

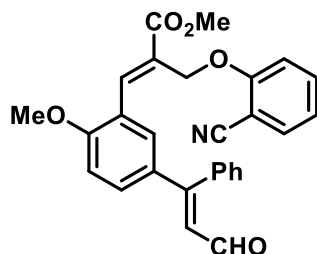

Yellow solid; Yield (68%), M.P (165 °C), (*E/Z* = 84/16), <sup>1</sup>H NMR (400 MHz, CDCl<sub>3</sub>) δ 9.32 (d, *J* = 7.9 Hz, 1H), 8.16 (s, 1H), 7.59 – 7.31 (m, 5H), 7.24 – 6.91 (m, 9H), 6.86 (d, *J* = 8.5 Hz, 1H), 6.34 (d, *J* = 7.9 Hz, 1H), 4.78 (s, 2H), 3.92 (s, 3H), 3.83 (s, 3H); <sup>13</sup>C NMR (100 MHz, CDCl<sub>3</sub>) δ 193.30, 167.05, 161.34, 160.02, 159.76, 141.16, 136.41, 134.23, 134.19, 132.32, 131.70, 131.06, 130.42, 129.47, 128.67, 128.29, 126.86, 126.32, 123.72, 121.24, 112.56, 110.91, 102.60, 64.02, 56.04, 52.53. HRMS (ESI): calc. for [(C<sub>28</sub>H<sub>23</sub>NO<sub>5</sub>)] (M+H) 454.1654, measured 454.1683.

**Methyl (*E*)-2-((2-cyanophenoxy) methyl)-3-(5-((*E*)-3-methoxy-3-oxo-1-phenylprop-1-en-1-yl)-2-methylphenyl) acrylate (5e)**

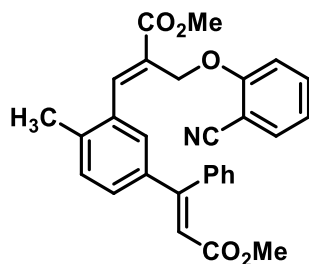

White solid; Yield (69%), M.P (92°C), <sup>1</sup>H NMR (400 MHz, CDCl<sub>3</sub>) δ 8.01 (s, 1H), 7.49 – 7.35 (m, 2H), 7.20 – 7.12 (m, 6H), 7.01 – 6.88 (m, 3H), 6.73 (d, *J* = 8.5 Hz, 1H), 6.11 (s, 1H), 4.65 (s, 2H), 3.78 (s, 3H), 3.47 (s, 3H), 2.26 (s, 3H); <sup>13</sup>C NMR (100 MHz, CDCl<sub>3</sub>) δ 166.87, 166.26, 160.03, 156.23, 144.42, 138.95, 138.89, 138.46, 134.20, 133.97, 133.71, 130.55, 129.25, 128.89, 128.81, 128.25, 127.91, 127.73, 121.17, 116.78, 116.16, 112.64, 102.64, 63.74, 52.55, 51.27, 19.92; HRMS (ESI): calc. for [(C<sub>29</sub>H<sub>25</sub>NO<sub>5</sub>)] (M+H) 468.1811, measured 468.1814.

**Methyl (*E*)-3-(4-chloro-3-((*E*)-3-methoxy-3-oxo-1-phenylprop-1-en-1-yl) phenyl) -2-((2-cyanophenoxy)methyl)acrylate (5f)**

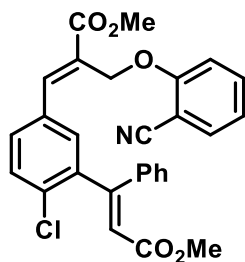

Yellow solid; Yield (62%), M.P (117 °C),  $^1\text{H NMR}$  (400 MHz,  $\text{CDCl}_3$ )  $\delta$  8.01 (s, 1H), 7.57 – 7.41 (m, 5H), 7.36 (d,  $J = 2.1$  Hz, 1H), 7.26 – 7.22 (m, 3H), 7.15 (dd,  $J = 7.9, 1.7$  Hz, 2H), 7.04– 7.00 (m, 2H), 6.03 (s, 1H), 4.87 (s, 2H), 3.85 (s, 3H), 3.63 (s, 3H);  $^{13}\text{C NMR}$  (100 MHz,  $\text{CDCl}_3$ )  $\delta$  166.97, 166.07, 159.93, 153.17, 144.87, 141.24, 137.56, 134.58, 134.46, 134.35, 133.99, 132.92, 132.13, 130.88, 130.62, 128.92, 128.74, 128.71, 127.82, 127.40, 127.24, 121.69, 121.55, 116.20, 113.15, 102.67, 63.74, 52.68, 51.55; HRMS (ESI): calc. for  $[(\text{C}_{28}\text{H}_{22}\text{ClNO}_5)]$  (M+H) 488.1265, measured 488.1181.

**Dimethyl 2-(3-((*E*)-2-((2-cyanophenoxy) methyl)-3-ethoxy-3-oxoprop-1-en-1-yl)phenyl) maleate (6a)**

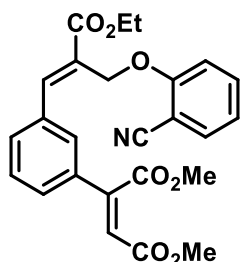

White solid; Yield (77%), M.P.( 107 °C),  $^1\text{H NMR}$  (400 MHz,  $\text{CDCl}_3$ )  $\delta$  8.09 (s, 1H), 7.49 - (m, 6H), 7.08 (d,  $J = 8.4$  Hz, 1H), 7.03 (d,  $J = 8$  Hz, Hz, 1H), 7.00 (s, 1H), 4.97 (s, 2H), 4.32 (q,  $J = 7.1$  Hz, 2H), 3.74 (s, 3H), 3.57 (s, 3H), 1.34 (t,  $J = 7.1$  Hz, 3H).  $^{13}\text{C NMR}$  (100 MHz,  $\text{CDCl}_3$ )  $\delta$  166.87, 166.41, 165.30, 160.42, 145.92, 143.92, 134.39, 134.29, 133.98, 133.90, 130.35, 130.15, 129.73, 129.13, 128.40, 127.32, 121.33, 116.42, 113.66, 102.76, 64.14, 61.57, 53.12, 52.02, 14.37. HRMS (ESI): calc. for  $[(\text{C}_{25}\text{H}_{23}\text{NO}_7)]$  (M+Na) 472.1372, measured 472.1402.

**Dibutyl 2-(3-((*E*)-2-((2-cyanophenoxy) methyl)-3-ethoxy-3-oxoprop-1-en-1-yl)phenyl) maleate (6b)**

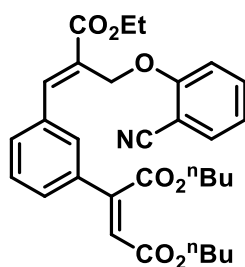

White solid; Yield (80%), M.P.( 131 °C),  $^1\text{H}$  NMR (400 MHz,  $\text{CDCl}_3$ )  $\delta$  8.08 (s, 1H), 7.61 – 7.35 (m, 7H), 7.09 (d,  $J = 8.5$  Hz, 1H), 7.05 – 6.97 (m, 3H), 4.98 (s, 2H), 4.32 (q,  $J = 7.1$  Hz, 3H), 4.15 (dd,  $J = 7.6, 5.6$  Hz, 3H), 3.96 (t,  $J = 6.6$  Hz, 3H), 1.66 – 1.57 (m, 2H), 1.43 – 1.14 (m, 9H), 0.90 (t,  $J = 7.4$  Hz, 3H), 0.83 (t,  $J = 7.2$  Hz, 3H).  $^{13}\text{C}$  NMR (100 MHz,  $\text{CDCl}_3$ )  $\delta$  166.82, 166.01, 165.22, 160.41, 145.79, 143.46, 134.71, 134.26, 133.87, 133.85, 130.42, 130.21, 129.67, 129.49, 129.37, 128.33, 127.28, 121.28, 116.37, 113.64, 102.76, 65.97, 65.00, 64.95, 64.13, 61.51, 30.52, 30.39, 19.17, 19.03, 14.34, 13.73, 13.70. HRMS (ESI): calc. for  $[(\text{C}_{31}\text{H}_{35}\text{NO}_7)]$  (M+H) 534.2492, measured 534.2523.

**Dimethyl 2-(3-((*E*)-3-butoxy-2-((2-cyanophenoxy) methyl)-3-oxoprop-1-en-1-yl)phenyl) maleate (6c)**

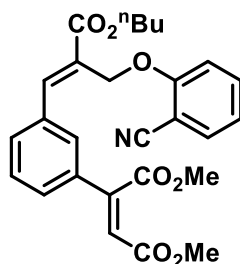

Colorless liquid; Yield (76%),  $^1\text{H}$  NMR (400 MHz,  $\text{CDCl}_3$ )  $\delta$  8.08 (s, 1H), 7.60 – 7.36 (m, 5H), 7.25 (d,  $J = 9.2$  Hz, 1H), 7.08 (d,  $J = 8.5$  Hz, 1H), 7.03 (d,  $J = \text{Hz}$ , 1H), 6.99 (s, 1H), 4.97 (s, 2H), 4.26 (t,  $J = 8$  Hz, 2H), 3.74 (s, 3H), 3.57 (s, 3H), 1.72 – 1.38 (m, 4H), 0.93 (t,  $J = 7.4$  Hz, 3H).  $^{13}\text{C}$  NMR (100 MHz,  $\text{CDCl}_3$ )  $\delta$  166.43, 165.33, 160.44, 145.96, 143.95, 134.41, 134.31, 133.92, 130.35, 130.17, 129.76, 129.15, 128.42, 127.35, 121.32, 116.40, 113.61, 102.76, 65.46, 64.18, 53.13, 52.03, 30.80, 19.34, 13.86, 1.15. HRMS (ESI): calc. for  $[(\text{C}_{27}\text{H}_{27}\text{NO}_7)]$  (M+H) 478.1866, measured 478.1872.

**Dimethyl 2-(3-((*E*)-2-((2-cyanophenoxy)methyl)-3-methoxy-3-oxoprop-1-en-1-yl)-4-methylphenyl) maleate (6d)**



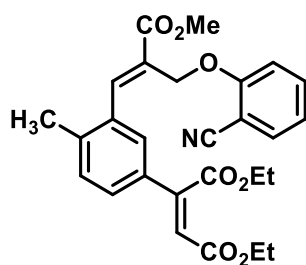

Colorless liquid; Yield (83%),  $^1\text{H}$  NMR (400 MHz,  $\text{CDCl}_3$ )  $\delta$  8.13 (s, 1H), 7.57 – 7.35 (m, 4H), 7.20 (dd,  $J = 13.6, 7.7$  Hz, 2H), 7.13 (dd,  $J = 7.8, 1.5$  Hz, 1H), 6.96 (dt,  $J = 7.3, 3.4$  Hz, 3H), 6.90 (s, 1H), 4.90 (s, 2H), 4.11 (q,  $J = 7.1$  Hz, 2H), 3.95 (dd,  $J = 14.3, 7.1$  Hz, 2H), 3.86 (s, 4H), 2.32 (s, 3H), 1.21 (t,  $J = 7.1$  Hz, 3H), 1.08 (t,  $J = 7.1$  Hz, 3H).  $^{13}\text{C}$  NMR (100 MHz,  $\text{CDCl}_3$ )  $\delta$  167.14, 166.02, 164.93, 160.38, 144.98, 144.15, 137.63, 135.26, 134.37, 134.08, 133.89, 133.68, 132.94, 131.77, 130.06, 129.97, 129.72, 128.61, 127.84, 121.03, 116.35, 113.56, 113.33, 102.59, 64.07, 62.03, 60.85, 52.53, 19.98, 14.15, 14.02. HRMS (ESI): calc. for  $[(\text{C}_{27}\text{H}_{27}\text{NO}_7)]$  (M+H) 478.1866, measured 478.1830.

**Dimethyl 2-(3-((*E*)-2-((2-cyanophenoxy) methyl)-3-methoxy-3-oxoprop-1-en-1-yl)-4-methoxyphenyl) maleate (6e)**

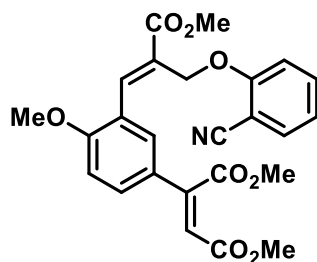

Colorless liquid; Yield (85%),  $^1\text{H}$  NMR (400 MHz,  $\text{CDCl}_3$ )  $\delta$  8.23 (s, 1H), 7.55 – 7.40 (m, 1H), 7.29 – 7.23 (m, 3H), 7.08 (d,  $J = 8.4$  Hz, 1H), 6.98 (td,  $J = 7.6, 0.8$  Hz, 1H), 6.93 – 6.85 (m, 2H), 4.95 (s, 2H), 3.89 (s, 3H), 3.85 (s, 3H), 3.66 (s, 3H), 3.52 (s, 3H).  $^{13}\text{C}$  NMR (100 MHz,  $\text{CDCl}_3$ )  $\delta$  167.36, 166.65, 165.37, 160.50, 158.13, 144.02, 142.35, 134.12, 133.78, 132.26, 131.89, 128.00, 126.76, 125.85, 122.82, 121.07, 116.39, 113.63, 109.84, 102.62, 64.49, 55.73, 52.97, 52.45, 51.86. HRMS (ESI): calc. for  $[(\text{C}_{25}\text{H}_{23}\text{NO}_8)]$  (M+Na) 488.1321, measured 488.1346.

**Diethyl 2-(3-((*E*)-2-((2-cyanophenoxy) methyl)-3-methoxy-3-oxoprop-1-en-1-yl)-4-methoxyphenyl) maleate (6f)**

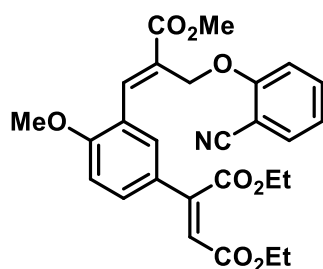

Colorless liquid; Yield (89%),  $^1\text{H}$  NMR (400 MHz,  $\text{CDCl}_3$ )  $\delta$  8.22 (s, 1H), 7.52 (dd,  $J = 7.7$ , 1.5 Hz, 1H), 7.45 (dd,  $J = 12.5$ , 5.2 Hz, 1H), 7.40 (d,  $J = 1.9$  Hz, 1H), 7.29 – 7.21 (m,  $\text{CDCl}_3$  merged 3H), 7.06 (d,  $J = 8.5$  Hz, 1H), 6.97 (t,  $J = 7.5$  Hz, 1H), 6.90 (d,  $J = 8.6$  Hz, 1H), 6.87 (s, 1H), 4.95 (s, 2H), 4.09 (q,  $J = 7.1$  Hz, 2H), 3.96 (q,  $J = 7.1$  Hz, 2H), 3.88 (s, 3H), 3.85 (s, 3H), 1.21 (t,  $J = 7.1$  Hz, 3H), 1.10 (t,  $J = 7.1$  Hz, 3H);  $^{13}\text{C}$  NMR (100 MHz,  $\text{CDCl}_3$ )  $\delta$  167.35, 166.20, 165.07, 160.50, 158.05, 143.82, 142.16, 134.09, 133.68, 132.31, 131.90, 128.14, 126.76, 126.05, 122.68, 120.98, 116.36, 113.64, 109.77, 102.58, 61.97, 60.81, 55.71, 52.40, 14.14, 14.05; HRMS (ESI): calc. for  $[(\text{C}_{27}\text{H}_{27}\text{NO}_8)]$  (M+H) 494.1815, measured 494.1813.

**Dibutyl 2-(3-((*E*)-2-((2-cyanophenoxy)methyl)-3-methoxy-3-oxoprop-1-en-1-yl)-4-methoxyphenyl)maleate (6g)**

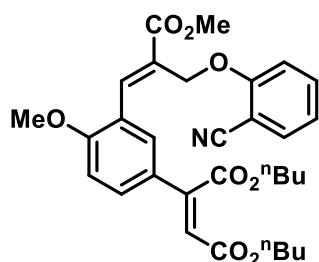

Colorless liquid; Yield (87%),  $^1\text{H}$  NMR (400 MHz,  $\text{CDCl}_3$ )  $\delta$  8.21 (s, 1H), 7.55 – 7.37 (m, 3H), 7.25 (dd,  $J = 7.9$ , 2.7 Hz, 1H), 7.06 (d,  $J = 8.5$  Hz, 1H), 6.97 (t,  $J = 7.6$  Hz, 1H), 6.89 (d,  $J = 8.0$  Hz, 1H), 6.87 (s, 1H), 4.96 (s, 2H), 4.03 (t,  $J = 6.7$  Hz, 2H), 3.92 (d,  $J = 6.6$  Hz, 2H), 3.88 (s, 3H), 3.85 (s, 3H), 1.58 (dd,  $J = 14.4$ , 7.3 Hz, 2H), 1.43 (dd,  $J = 14.7$ , 6.9 Hz, 2H), 1.31 (dd,  $J = 15.0$ , 7.5 Hz, 2H), 1.23 – 1.16 (m, 2H), 0.89 (t,  $J = 7.4$  Hz, 3H), 0.83 (t,  $J = 7.4$  Hz, 3H);  $^{13}\text{C}$  NMR (100 MHz,  $\text{CDCl}_3$ )  $\delta$  167.37, 166.30, 165.30, 160.56, 158.07, 143.66, 142.11, 134.09, 133.72, 132.29, 131.94, 128.22, 126.84, 126.21, 122.73, 121.00, 116.40, 113.70, 109.79, 102.65, 65.85, 64.80, 64.53, 55.74, 52.43, 30.55, 30.51, 19.20, 19.10, 13.79, 13.75; HRMS (ESI): calc. for  $[(\text{C}_{31}\text{H}_{35}\text{NO}_8)]$  (M+H) 550.2441, measured 550.2472.

**Diethyl 2-(3-((*E*)-2-((2-cyanophenoxy)methyl)-3-ethoxy-3-oxoprop-1-en-1-yl)-4-methoxyphenyl) maleate (6h)**

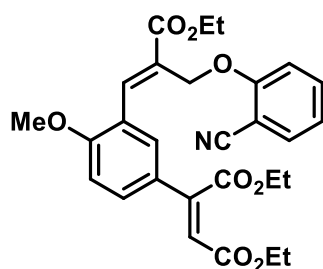

Yellow solid; Yield (83%), M.P (107 °C),  $^1\text{H}$  NMR (400 MHz,  $\text{CDCl}_3$ )  $\delta$  8.21 (s, 1H), 7.55 – 7.38 (m, 3H), 7.30 – 7.23 (m,  $\text{CDCl}_3$  merged 2H), 7.07 (d,  $J = 8.5$  Hz, 1H), 6.98 (td,  $J = 7.6$ , 0.6 Hz, 1H), 6.94 – 6.87 (m, 2H), 4.97 (s, 2H), 4.31 (q,  $J = 7.1$  Hz, 2H), 4.11 (q,  $J = 7.1$  Hz, 2H), 3.98 (q,  $J = 7.1$  Hz, 2H), 3.89 (s, 3H), 1.34 (t,  $J = 7.1$  Hz, 3H), 1.23 (t,  $J = 7.1$  Hz, 3H), 1.11 (t,  $J = 7.1$  Hz, 3H).  $^{13}\text{C}$  NMR (100 MHz,  $\text{CDCl}_3$ )  $\delta$  166.84, 166.20, 165.07, 160.54, 158.01, 143.82, 141.81, 134.07, 133.66, 132.21, 131.90, 128.11, 127.12, 126.03, 122.76, 120.91, 116.36, 113.60, 109.75, 102.52, 64.50, 61.95, 61.32, 60.79, 55.69, 14.34, 14.13, 14.03. HRMS (ESI): calc. for  $[(\text{C}_{28}\text{H}_{29}\text{NO}_8)]$  (M+H) 508.1971, measured 508.1957.

**Dimethyl 2-(4-chloro-3-((*E*)-2-((2-cyanophenoxy)methyl)-3-methoxy-3-oxoprop-1-en-1-yl)phenyl)maleate (6i)**

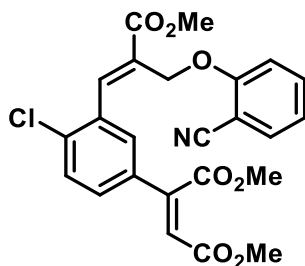

Colorless liquid; Yield (69%),  $^1\text{H}$  NMR (400 MHz,  $\text{CDCl}_3$ )  $\delta$  8.18 (s, 1H), 7.64 (dd,  $J = 7.7$ , 1.0 Hz, 1H), 7.59 – 7.41 (m, 5H), 7.33 (t,  $J = 7.7$  Hz, 1H), 7.19 (ddd,  $J = 10.3$ , 7.9, 1.7 Hz, 2H), 7.13 (s, 1H), 7.08 – 6.97 (m, 3H), 6.95 (s, 1H), 4.88 (s, 2H), 3.88 (s, 4H), 3.80 (s, 3H), 3.62 (s, 3H).  $^{13}\text{C}$  NMR (100 MHz,  $\text{CDCl}_3$ )  $\delta$  166.78, 165.90, 165.57, 164.90, 164.71, 160.24, 143.37, 143.22, 142.62, 134.58, 134.48, 134.18, 133.92, 133.75, 133.22, 132.79, 132.72, 132.37, 131.81, 131.42, 131.16, 131.02, 130.38, 129.13, 128.70, 128.45, 126.82, 121.56, 121.29, 116.45, 116.30, 113.62, 102.78, 102.60, 64.38, 64.08, 53.30, 53.10, 52.70, 52.20, 51.95. HRMS (ESI): calc. for  $[(\text{C}_{24}\text{H}_{20}\text{ClNO}_7)]$  (M+H) 470.1007, measured 470.1012.

**Dimethyl 2-(2-chloro-5-((*E*)-2-((2-cyanophenoxy)methyl)-3-methoxy-3-oxoprop-1-en-1-yl)phenyl)maleate (6j)**

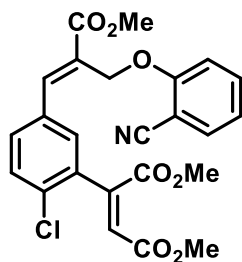

Yellow liquid; Yield (72%),  $^1\text{H NMR}$  (400 MHz,  $\text{CDCl}_3$ )  $\delta$  8.05 (s, 1H), 7.58 – 7.36 (m, 5H), 7.21 – 6.92 (m, 3H), 4.93 (s, 2H), 3.85 (s, 3H), 3.74 (s, 3H), 3.56 (s, 3H);  $^{13}\text{C NMR}$  (100 MHz,  $\text{CDCl}_3$ )  $\delta$  167.06, 165.32, 164.49, 160.12, 145.26, 142.39, 134.40, 134.29, 133.98, 133.85, 132.52, 131.77, 130.73, 130.30, 129.61, 127.30, 121.50, 116.27, 113.61, 102.72, 63.97, 53.18, 52.60, 52.06; HRMS (ESI): calc. for  $[(\text{C}_{24}\text{H}_{20}\text{ClNO}_7)]$  (M+H) 470.1007, measured 470.0998.

**Dimethyl 2-(5-((E)-2-((2-cyanophenoxy) methyl)-3-methoxy-3-oxoprop-1-en-1-yl) -2-methylphenyl) maleate (6k)**

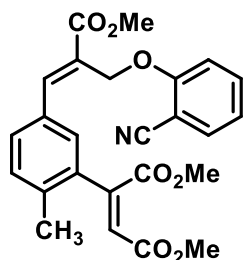

Colourless liquid; Yield (64%),  $^1\text{H NMR}$  (400 MHz,  $\text{CDCl}_3$ )  $\delta$  8.07 (s, 1H), 7.58 – 7.42 (m, 3H), 7.30 – 7.16 (m, 1H), 7.09 – 6.95 (m, 4H), 4.95 (s, 2H), 3.86 (s, 3H), 3.74 (s, 3H), 3.56 (s, 3H), 2.17 (s, 3H);  $^{13}\text{C NMR}$  (100 MHz,  $\text{CDCl}_3$ )  $\delta$  167.59, 166.24, 164.96, 160.35, 158.66, 146.71, 144.48, 138.20, 134.68, 134.61, 134.32, 133.95, 133.92, 133.01, 131.55, 130.41, 130.16, 129.77, 129.68, 125.96, 121.36, 120.95, 116.60, 113.62, 102.76, 64.28, 53.16, 52.56, 52.04, 29.83; HRMS (ESI): calc. for  $[(\text{C}_{25}\text{H}_{23}\text{NO}_7)]$  (M+H) 450.1553, measured 450.1548.

**Dimethyl 2-(5-((E)-2-((2-cyanophenoxy) methyl)-3-methoxy-3-oxoprop-1-en-1-yl)-2-ethylphenyl) maleate (6l)**

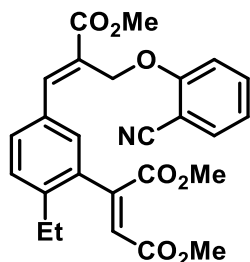

Colorless gummy liquid; Yield (73%),  $^1\text{H NMR}$  (400 MHz,  $\text{CDCl}_3$ )  $\delta$  8.08 (s, 1H), 7.59 – 7.45 (m, 3H), 7.31 (d,  $J = 8.0$  Hz, 1H), 7.20 (d,  $J = 1.8$  Hz, 1H), 7.09 – 7.00 (m, 3H), 4.95 (d,

$J = 21.2$  Hz, 2H), 3.85 (s, 3H), 3.72 (s, 3H), 3.54 (s, 3H), 2.51 – 2.41 (m, 2H), 1.11 (t,  $J = 7.6$  Hz, 3H).  $^{13}\text{C}$  NMR (100 MHz,  $\text{CDCl}_3$ )  $\delta$  167.52, 166.42, 164.89, 160.32, 146.69, 144.54, 143.86, 134.26, 134.02, 133.93, 131.49, 130.36, 129.93, 129.76, 128.55, 125.94, 121.32, 116.40, 113.57, 102.75, 64.26, 53.13, 52.52, 51.97, 26.38, 14.44. HRMS (ESI): calc. for  $[(\text{C}_{26}\text{H}_{25}\text{NO}_7)]$  (M+H) 464.1700, measured 464.1696.

**Diethyl 2-(5-((*E*)-2-((2-cyanophenoxy) methyl)-3-methoxy-3-oxoprop-1-en-1-yl)-2-methoxyphenyl) maleate (6m)**

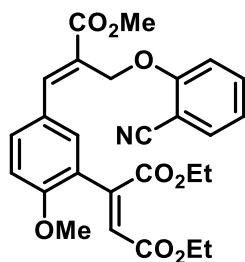

Colorless liquid; Yield (73%),  $^1\text{H}$  NMR (400 MHz,  $\text{CDCl}_3$ )  $\delta$  8.03 (s, 1H), 7.64 – 7.45 (m, 3H), 7.32 (d,  $J = 2.1$  Hz, 1H), 7.13 (d,  $J = 8.5$  Hz, 1H), 7.01 (t,  $J = 7.4$  Hz, 1H), 6.93 (t,  $J = 4.3$  Hz, 2H), 5.00 (s, 2H), 4.19 (q,  $J = 7.1$  Hz, 2H), 4.00 (q,  $J = 7.1$  Hz, 2H), 3.83 (s, 3H), 3.78 (s, 3H), 1.23 (t,  $J = 7.1$  Hz, 3H), 1.08 (t,  $J = 7.1$  Hz, 3H);  $^{13}\text{C}$  NMR (100 MHz,  $\text{CDCl}_3$ )  $\delta$  167.69, 166.08, 164.85, 160.39, 158.29, 146.44, 141.64, 134.30, 133.84, 132.91, 132.22, 129.31, 126.24, 124.40, 124.03, 121.26, 116.42, 113.70, 110.87, 102.72, 64.30, 61.83, 60.79, 55.82, 52.41, 14.16, 13.99; HRMS (ESI): calc. for  $[(\text{C}_{27}\text{H}_{27}\text{NO}_8)]$  (M+H) 494.1815, measured 494.1746.

**Dimethyl 2-(6-((*E*)-2-((2-cyanophenoxy) methyl)-3-methoxy-3-oxoprop-1-en-1-yl)benzo[d][1,3]dioxol-4-yl) maleate (6n)**

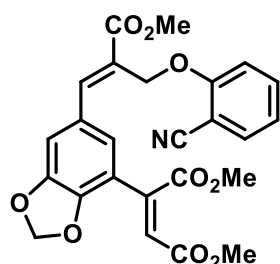

Yellow liquid; Yield (79%),  $^1\text{H}$  NMR (400 MHz,  $\text{CDCl}_3$ )  $\delta$  7.99 (s, 1H), 7.57 – 7.50 (m, 2H), 7.15 (d,  $J = 9.0$  Hz, 1H), 7.06 – 6.96 (m, 4H), 5.99 (s, 2H), 5.00 (s, 2H), 3.84 (s, 3H), 3.76 (s, 3H), 3.64 (s, 3H);  $^{13}\text{C}$  NMR (100 MHz,  $\text{CDCl}_3$ )  $\delta$  167.56, 165.66, 164.86, 160.30, 148.05, 147.16, 146.45, 138.14, 134.32, 133.89, 130.49, 127.68, 126.32, 124.95, 121.33, 116.39, 115.60, 113.61, 109.80, 102.71, 101.98, 64.06, 53.18, 52.50, 52.13; HRMS (ESI): calc. for  $[(\text{C}_{25}\text{H}_{21}\text{NO}_9)]$  (M+Na) 502.1114, measured 502.1102.

**Diethyl 2-(6-((*E*)-2-((2-cyanophenoxy) methyl)-3-methoxy-3-oxoprop-1-en-1-yl)benzo[d][1,3]dioxol-4-yl)maleate (6o)**

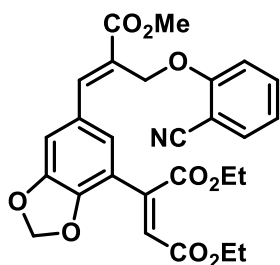

White color solid; Yield (83%), M.P (83 °C), <sup>1</sup>H NMR (400 MHz, CDCl<sub>3</sub>) δ 7.98 (s, 1H), 7.59 – 7.46 (m, 2H), 7.13 (d, *J* = 8.5 Hz, 1H), 7.03 (td, *J* = 12.0, 4.7 Hz, 3H), 6.95 (d, *J* = 0.9 Hz, 1H), 6.23 (s, 1H), 5.98 (s, 2H), 5.00 (s, 2H), 4.23 (dd, *J* = 16.7, 7.1 Hz, 2H), 4.07 (q, *J* = 7.1 Hz, 2H), 3.84 (s, 3H), 1.29 (t, *J* = 7.2 Hz, 3H), 1.15 (t, *J* = 7.1 Hz, 3H); <sup>13</sup>C NMR (100 MHz, CDCl<sub>3</sub>) δ 167.60, 165.21, 164.61, 160.35, 148.04, 147.19, 146.42, 138.02, 134.33, 133.90, 130.78, 129.93, 127.63, 126.54, 124.95, 121.32, 116.40, 115.94, 113.66, 109.68, 102.78, 101.91, 64.10, 62.26, 61.13, 52.51, 14.19, 14.07; HRMS (ESI): calc. for [(C<sub>27</sub>H<sub>25</sub>NO<sub>9</sub>)] (M+H) 508.1608, measured 508.1616.

**Dibutyl 2-(6-((*E*)-2-((2-cyanophenoxy) methyl)-3-methoxy-3-oxoprop-1-en-1-yl)benzo[d][1,3]dioxol-4-yl) maleate (6p)**

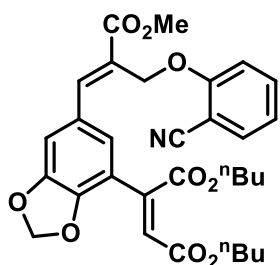

Yellow Color solid; Yield (80%), M.P (106 °C), <sup>1</sup>H NMR (400 MHz, CDCl<sub>3</sub>) δ 7.99 (s, 1H), 7.57 – 7.50 (m, 2H), 7.14 (d, *J* = 8.5 Hz, 1H), 7.08 – 6.95 (m, 4H), 5.98 (s, 2H), 5.00 (s, 2H), 4.15 (t, *J* = 6.6 Hz, 2H), 4.02 (t, *J* = 6.6 Hz, 2H), 3.85 (s, 3H), 1.64-1.21(m, 8H), 0.92 (t, *J* = 7.1 Hz, 3H), 0.86 (t, *J* = 7.4 Hz, 3H). <sup>13</sup>C NMR (100 MHz, CDCl<sub>3</sub>) δ 167.58, 165.28, 164.77, 160.34, 148.04, 147.14, 146.40, 137.89, 134.32, 133.90, 130.83, 127.64, 126.56, 124.92, 121.32, 116.39, 116.02, 113.63, 109.61, 102.76, 101.93, 66.11, 65.08, 64.08, 52.51, 30.54, 30.50, 19.18, 19.10, 13.75. HRMS (ESI): calc. for [(C<sub>31</sub>H<sub>33</sub>NO<sub>9</sub>)] (M+H) 564.2234, measured 564.2266.

**Dimethyl 2-(5-((*E*)-2-((2-cyanophenoxy) methyl)-3-methoxy-3-oxoprop-1-en-1-yl)-2-fluorophenyl) maleate (6q)**

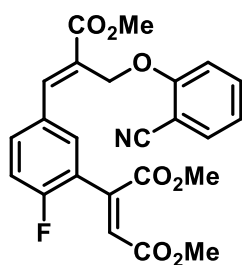

Yellow liquid; Yield (71%),  $^1\text{H}$  NMR (400 MHz,  $\text{CDCl}_3$ )  $\delta$  8.06 (s, 1H), 7.59 – 7.47 (m, 3H), 7.42 (dd,  $J = 6.8, 2.2$  Hz, 1H), 7.16 – 7.07 (m, 3H), 7.03 (td,  $J = 7.6, 0.6$  Hz, 1H), 4.96 (s, 2H), 3.85 (s, 3H), 3.74 (s, 3H), 3.60 (s, 3H);  $^{13}\text{C}$  NMR (100 MHz,  $\text{CDCl}_3$ )  $\delta$  167.27, 165.52, 164.67, 160.26, 159.17, 145.45, 138.46, 134.33, 133.89, 132.85, 132.81, 132.22, 132.13, 130.93, 129.97, 129.93, 126.63, 122.55, 122.38, 121.48, 116.35, 116.09, 115.87, 113.69, 64.04, 53.23, 52.61, 52.13; HRMS (ESI): calc. for  $[(\text{C}_{24}\text{H}_{20}\text{FNO}_7)]$  (M+H) 454.1302, measured 454.1311.

**Dibutyl 2-(5-((*E*)-2-((2-cyanophenoxy)methyl)-3-methoxy-3-oxoprop-1-en-1-yl)-2-fluorophenyl) maleate (6r)**

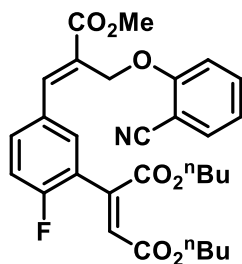

Yellow solid; Yield (70%), M.P (117 °C),  $^1\text{H}$  NMR (400 MHz,  $\text{CDCl}_3$ )  $\delta$  8.05 (s, 1H), 7.59 – 7.46 (m, 3H), 7.39 (dd,  $J = 6.8, 2.1$  Hz, 1H), 7.19 – 6.97 (m, 4H), 4.95 (s, 2H), 4.14 (t,  $J = 6.6$  Hz, 2H), 3.98 (t,  $J = 6.6$  Hz, 2H), 3.85 (s, 3H), 1.60 (dd,  $J = 14.4, 7.3$  Hz, 2H), 1.45 (dt,  $J = 14.6, 6.7$  Hz, 2H), 1.31 (dd,  $J = 15.0, 7.5$  Hz, 2H), 1.22 (dd,  $J = 15.2, 7.6$  Hz, 2H), 0.87 (dt,  $J = 17.6, 7.4$  Hz, 6H).  $^{13}\text{C}$  NMR (100 MHz,  $\text{CDCl}_3$ )  $\delta$  167.26, 165.15, 164.52, 161.73, 160.27, 159.22, 145.38, 138.21, 134.33, 133.87, 132.94, 132.90, 131.99, 131.90, 131.21, 129.88, 129.85, 126.59, 122.92, 122.75, 121.45, 116.34, 116.02, 115.80, 113.68, 102.79, 66.15, 65.10, 64.04, 52.60, 30.48, 30.42, 19.12, 19.06, 13.73. HRMS (ESI): calc. for  $[(\text{C}_{30}\text{H}_{32}\text{FNO}_7)]$  (M+H) 538.2241, measured 538.2232.

**Methyl (*E*)-2-((2-cyanophenoxy)methyl)-3-(5-((*E*)-3-ethoxy-3-oxoprop-1-en-1-yl)furan-2-yl)acrylate (8a)**

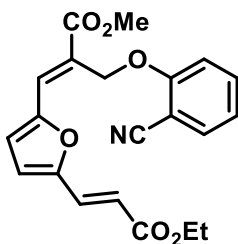

Yellow solid; yield (87%), M.P ( 87°C), <sup>1</sup>H NMR (400 MHz, CDCl<sub>3</sub>) δ 7.69 (s, 1H), 7.69 – 7.53 (m, 2H), 7.30 (s, 1H), 7.21 (d, *J* = 8.4 Hz, 1H), 7.03 (t, *J* = 7.5 Hz, 1H), 6.90 (d, *J* = 3.5 Hz, 1H), 6.70 (d, *J* = 3.5 Hz, 1H), 5.89 (d, *J* = 15.8 Hz, 1H), 5.28 (s, 2H), 4.19 (q, *J* = 7.1 Hz, 2H), 3.87 (s, 3H), 1.30 (t, *J* = 7.1 Hz, 3H); <sup>13</sup>C NMR (100 MHz, CDCl<sub>3</sub>) δ 167.26, 166.44, 160.84, 153.90, 151.84, 134.60, 134.11, 130.66, 129.88, 123.47, 121.36, 120.81, 118.48, 116.93, 116.26, 113.09, 102.48, 63.98, 60.72, 52.69, 14.39; HRMS (ESI): calc. for [(C<sub>21</sub>H<sub>19</sub>NO<sub>6</sub>)] (M+H) 382.1291, measured 382.1303.

**Methyl (*E*)-2-((2-cyanophenoxy)methyl)-3-(5-((*E*)-3-oxo-3-phenoxyprop-1-en-1-yl)furan-2-yl)acrylate (8b)**

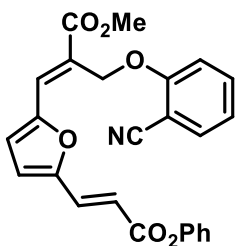

Yellow solid; Yield (85%), M.P (70 °C), <sup>1</sup>H NMR (400 MHz, CDCl<sub>3</sub>) δ 7.71 (s, 1H), 7.62 – 7.50 (m, 2H), 7.46 – 7.37 (m, 3H), 7.23 (d, *J* = 8.3 Hz, 2H), 7.09 (d, *J* = 7.7 Hz, 2H), 7.01 (t, *J* = 7.6 Hz, 1H), 6.92 (d, *J* = 3.6 Hz, 1H), 6.76 (d, *J* = 3.6 Hz, 1H), 6.03 (d, *J* = 15.7 Hz, 1H), 5.30 (s, 2H), 3.88 (s, 3H); <sup>13</sup>C NMR (100 MHz, CDCl<sub>3</sub>) δ 167.18, 164.84, 160.82, 153.57, 152.26, 150.70, 134.69, 134.13, 131.45, 130.58, 129.56, 125.97, 123.84, 121.55, 121.42, 120.90, 117.84, 117.23, 116.28, 113.00, 102.35, 63.93, 52.74; HRMS (ESI): calc. for [(C<sub>25</sub>H<sub>19</sub>NO<sub>6</sub>)] (M+H) 430.1291, measured 430.1282.

**Methyl (*E*)-2-((2-cyanophenoxy)methyl)-3-(5-((*E*)-3-((7,7-dimethylbicyclo[2.2.1]heptan-2-yl)oxy)-3-oxoprop-1-en-1-yl)furan-2-yl)acrylate (8c)**

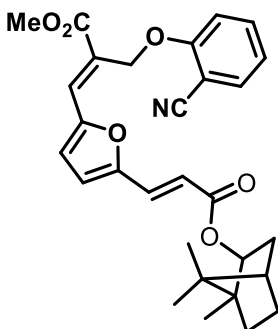



Yellow solid; Yield (92%), M.P (114 °C),  $^1\text{H}$  NMR (400 MHz,  $\text{CDCl}_3$ )  $\delta$  7.68 (s, 1H), 7.61 – 7.46 (m, 2H), 7.27 – 7.15 (m, 2H), 7.01 (t,  $J = 7.5$  Hz, 1H), 6.90 (d,  $J = 3.5$  Hz, 1H), 6.69 (d,  $J = 3.5$  Hz, 1H), 5.95 (d,  $J = 15.8$  Hz, 1H), 5.26 (s, 2H), 4.73 (dd,  $J = 7.5, 2.9$  Hz, 1H), 3.85 (s, 3H), 1.84 – 1.50 (m, 6H), 1.19 – 1.05 (d,  $J = 3.5$  Hz, 2H), 0.98 (s, 3H), 0.84 (s, 3H), 0.83 (s, 3H).  $^{13}\text{C}$  NMR (100 MHz,  $\text{CDCl}_3$ )  $\delta$  167.20, 165.93, 160.72, 153.86, 151.76, 134.58, 134.04, 130.67, 129.58, 123.36, 121.37, 120.74, 118.93, 116.91, 116.26, 112.98, 102.43, 81.42, 63.93, 52.67, 49.01, 47.04, 45.12, 38.83, 33.79, 27.13, 20.22, 20.17, 11.57; HRMS (ESI): calc. for  $[(\text{C}_{29}\text{H}_{31}\text{NO}_6)]$  (M+H) 490.2230, measured 490.2229.

**Methyl (*E*)-2-((2-cyanophenoxy) methyl)-3-(5-((*E*)-3-((2-ethylhexyl) oxy)-3-oxoprop-1-en-1-yl)furan-2-yl) acrylate (8d)**

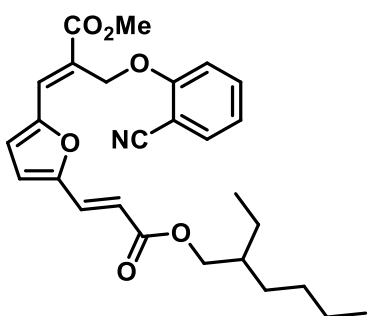

White solid; Yield (96%), M.P. (91 °C),  $^1\text{H}$  NMR (400 MHz,  $\text{CDCl}_3$ )  $\delta$  7.68 (s, 1H), 7.61 – 7.47 (m, 2H), 7.30 – 7.21 (m,  $\text{CDCl}_3$  merged 2H), 7.20 (d,  $J = 8.5$  Hz, 1H), 7.01 (t,  $J = 7.6$  Hz, 1H), 6.90 (d,  $J = 3.6$  Hz, 1H), 6.69 (d,  $J = 3.6$  Hz, 1H), 5.92 (d,  $J = 15.8$  Hz, 1H), 5.27 (s, 2H), 4.04 (t,  $J = 5.6$  Hz, 2H), 3.85 (s, 3H), 1.43 – 1.18 (m, 4H), 0.90 (t,  $J = 7.4$  Hz, 10H);  $^{13}\text{C}$  NMR (100 MHz,  $\text{CDCl}_3$ )  $\delta$  167.18, 166.60, 160.74, 153.84, 151.79, 134.52, 134.05, 130.63, 129.82, 123.37, 121.29, 120.78, 118.37, 116.98, 116.23, 112.99, 102.42, 67.13, 63.91, 52.65, 38.87, 30.43, 29.01, 23.81, 23.07, 14.16, 11.07; HRMS (ESI): calc. for  $[(\text{C}_{27}\text{H}_{31}\text{NO}_6)]$  (M+H) 466.2230, measured 466.2210.

**Methyl (*E*)-2-((2-cyanophenoxy) methyl)-3-(5-((*Z*)-3-oxo-1-phenylprop-1-en-1-yl)furan-2-yl) acrylate (8e)**

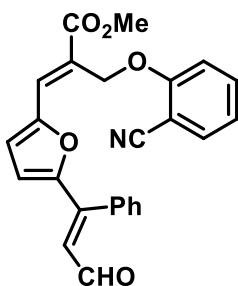

Yellow solid; Yield (88%), M.P (146 °C), (*E/Z* = 86/14),  $^1\text{H}$  NMR (400 MHz,  $\text{CDCl}_3$ )  $\delta$  9.34 (d,  $J = 8.2$  Hz, 1H), 7.75 (s, 1H), 7.56 – 7.28 (m, 9H), 7.20 (d,  $J = 8.4$  Hz, 1H), 7.03 – 6.85

(m, 6H), 6.90 (d,  $J = 3.7$  Hz, 1H), 6.46 (d,  $J = 3.7$  Hz, 1H), 6.30 (d,  $J = 8.2$  Hz, 1H), 5.30 (s, 2H), 3.88 (s, 3H).  $^{13}\text{C}$  NMR (100 MHz,  $\text{CDCl}_3$ )  $\delta$  193.02, 167.24, 160.85, 158.76, 155.93, 152.84, 148.29, 135.00, 134.70, 133.99, 133.05, 130.54, 130.30, 129.96, 128.68, 124.39, 124.04, 121.53, 121.00, 120.92, 119.06, 116.66, 113.17, 99.85, 52.86. HRMS (ESI): calc. for  $[(\text{C}_{25}\text{H}_{20}\text{NO}_5)]$  (M+H) 414.1341, measured 414.1354.

**Methyl (*E*)-2-((2-cyanophenoxy)methyl)-3-(5-((*E*)-3-methoxy-3-oxo-1-phenylprop-1-en-1-yl)furan-2-yl)acrylate (8f)**

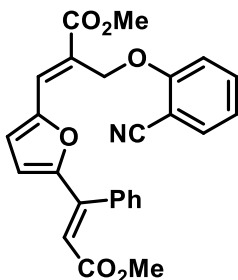

Brown red solid; Yield (82%), M.P (187 °C),  $^1\text{H}$  NMR (400 MHz,  $\text{CDCl}_3$ )  $\delta$  7.70 (s, 1H), 7.61 – 7.48 (m, 3H), 7.44 – 7.34 (m, 3H), 7.4 – 7.19 (m, 2H), 7.01 (td,  $J = 7.6, 0.8$  Hz, 1H), 6.83 (d,  $J = 3.7$  Hz, 1H), 6.25 – 6.14 (m, 1H), 6.15 (s, 1H), 5.29 (s, 2H), 3.87 (s, 3H), 3.50 (s, 3H);  $^{13}\text{C}$  NMR (100 MHz,  $\text{CDCl}_3$ )  $\delta$  167.26, 165.84, 160.79, 156.84, 151.64, 143.90, 135.30, 134.59, 134.11, 130.80, 128.74, 128.65, 128.08, 123.21, 121.07, 120.77, 117.38, 116.35, 114.53, 112.96, 102.36, 63.86, 52.69, 51.26; HRMS (ESI): calc. for  $[(\text{C}_{26}\text{H}_{21}\text{NO}_6)]$  (M+H) 444.1447, measured 444.1465.

**Ethyl (*E*)-3-(5-((*E*)-2-((2-cyanophenoxy)methyl)-3-methoxy-3-oxoprop-1-en-1-yl)furan-2-yl)-3-phenylacrylate (8g)**

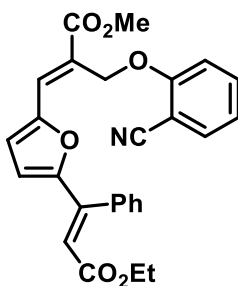

Yellow solid; Yield (77%), M.P(162 °C),  $^1\text{H}$  NMR (400 MHz,  $\text{CDCl}_3$ )  $\delta$  7.70 (s, 1H), 7.62 – 7.50 (m, 2H), 7.41 – 7.33 (m, 3H), 7.24 – 7.18 (m, 3H), 7.04 – 6.96 (m, 1H), 6.83 (d,  $J = 3.7$  Hz, 1H), 6.20 (d,  $J = 3.7$  Hz, 1H), 6.15 (s, 1H), 5.29 (s, 2H), 3.94 (q,  $J = 7.1$  Hz, 2H), 3.87 (s, 3H), 1.05 (t,  $J = 7.1$  Hz, 3H);  $^{13}\text{C}$  NMR (100 MHz,  $\text{CDCl}_3$ )  $\delta$  167.28, 165.55, 160.84, 156.93, 151.63, 143.43, 135.63, 134.61, 134.10, 130.82, 128.79, 128.56, 128.07, 123.19, 121.19,

120.76, 117.24, 116.36, 115.29, 113.02, 102.46, 63.93, 60.11, 52.69, 14.11. HRMS (ESI): calc. for [(C<sub>27</sub>H<sub>23</sub>NO<sub>6</sub>)] (M+H) 458.1604, measured 458.1623.

**Methyl (*E*)-3-(5-((*E*)-3-(3-(acryloyloxy)phenoxy)-3-oxoprop-1-en-1-yl)furan-2-yl)-2-((2-cyanophenoxy)methyl)acrylate (8h)**

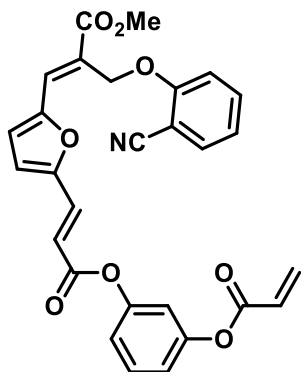

White solid; Yield (66%), M.P (174 °C), <sup>1</sup>H NMR (400 MHz, CDCl<sub>3</sub>) δ 7.71 (s, 1H), 7.65 – 7.51 (m, 1H), 7.48 – 7.31 (m, 2H), 7.22 (d, *J* = 8.5 Hz, 2H), 7.09 – 6.95 (m, 4H), 6.93 (t, *J* = 3.0 Hz, 1H), 6.77 (d, *J* = 3.6 Hz, 1H), 6.61 (dd, *J* = 17.3, 1.2 Hz, 1H), 6.31 (dd, *J* = 17.3, 10.4 Hz, 1H), 6.07 – 5.91 (m, 2H), 5.29 (s, 2H), 3.88 (s, 3H); <sup>13</sup>C NMR (100 MHz, CDCl<sub>3</sub>) δ 167.17, 164.41, 164.26, 160.82, 153.49, 152.37, 151.15, 134.71, 134.18, 133.13, 131.75, 130.57, 129.89, 127.81, 123.97, 121.47, 120.90, 119.09, 119.05, 118.09, 118.05, 116.86, 116.28, 115.47, 112.98, 102.38, 63.93, 52.76; HRMS (ESI): calc. for [(C<sub>28</sub>H<sub>21</sub>NO<sub>8</sub>)] (M+H) 500.1345, measured 500.1365.

**Methyl (*E*)-2-((2-cyanophenoxy)methyl)-3-(5-((*E*)-3-methoxy-3-oxoprop-1-en-1-yl)thiophen-2-yl)acrylate (8i)**

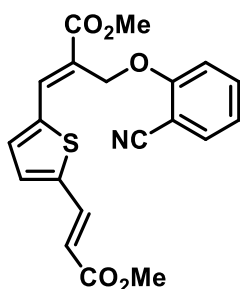

Yellow solid; Yield (91%), M.P (124 °C), <sup>1</sup>H NMR (400 MHz, CDCl<sub>3</sub>) δ 8.06 (s, 1H), 7.68 (d, *J* = 15.8 Hz, 1H), 7.62 – 7.52 (m, 2H), 7.37 (d, *J* = 3.9 Hz, 1H), 7.24 (d, *J* = 3.9 Hz, 1H), 7.18 (dd, *J* = 9.0, 0.7 Hz, 1H), 7.06 (d, *J* = 0.7 Hz, 1H), 6.22 (d, *J* = 15.8 Hz, 1H), 5.15 (s, 2H), 3.85 (s, 3H), 3.77 (s, 3H); <sup>13</sup>C NMR (100 MHz, CDCl<sub>3</sub>) δ 167.15, 166.88, 160.16, 144.91, 139.10, 137.92, 136.36, 134.71, 134.51, 134.13, 131.20, 123.78, 121.53, 118.79, 116.38, 113.17, 102.66, 63.54, 52.71, 51.96; HRMS (ESI): calc. for [(C<sub>20</sub>H<sub>17</sub>NO<sub>5</sub>S)] (M+H) 384.0906, measured 384.0870.

**Methyl (*E*)-2-((2-cyanophenoxy)methyl)-3-(5-((*E*)-3-ethoxy-3-oxoprop-1-en-1-yl)thiophen-2-yl)acrylate (8j)**

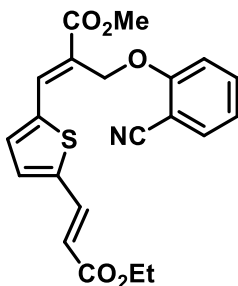

Yellow solid; Yield (90%), M.P (130 °C), <sup>1</sup>H NMR (400 MHz, CDCl<sub>3</sub>) δ 8.06 (s, 1H), 7.67 (d, *J* = 15.7 Hz, 1H), 7.57 (td, *J* = 6.3, 3.1 Hz, 2H), 7.37 (d, *J* = 3.9 Hz, 1H), 7.21 (dd, *J* = 21.6, 6.4 Hz, 2H), 7.06 (t, *J* = 7.6 Hz, 1H), 6.21 (d, *J* = 15.8 Hz, 1H), 5.15 (s, 2H), 4.23 (q, *J* = 7.1 Hz, 2H), 3.85 (s, 3H), 1.30 (t, *J* = 7.1 Hz, 3H). <sup>13</sup>C NMR (100 MHz, CDCl<sub>3</sub>) δ 167.20, 166.48, 160.17, 145.01, 139.03, 137.97, 136.13, 134.72, 134.53, 134.16, 131.14, 123.69, 121.52, 119.28, 116.41, 113.11, 102.64, 63.50, 60.87, 52.74, 14.39. HRMS (ESI): calc. for [(C<sub>21</sub>H<sub>19</sub>NO<sub>5</sub>S)] (M+H) 398.1062, measured 398.1052.

**Methyl (*E*)-2-((2-cyanophenoxy)methyl)-3-(5-((*E*)-3-oxo-3-(((1*R*,2*R*,4*R*)-1,7,7-trimethylbicyclo[2.2.1]heptan-2-yl)oxy)prop-1-en-1-yl)thiophen-2-yl)acrylate (8k)**

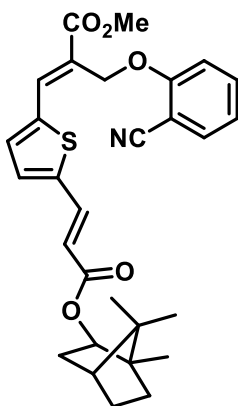

Yellow solid; Yield (91%), M.P (152 °C), <sup>1</sup>H NMR (400 MHz, CDCl<sub>3</sub>) δ 8.06 (s, 1H), 7.65 – 7.50 (m, 2H), 7.37 (d, *J* = 3.9 Hz, 1H), 7.21 (dd, *J* = 17.0, 6.2 Hz, 1H), 7.06 (t, *J* = 7.6 Hz, 1H), 6.16 (d, *J* = 15.7 Hz, 1H), 5.16 (s, 2H), 4.76 (dd, *J* = 7.3, 4.0 Hz, 1H), 3.86 (s, 3H), 1.90 – 1.65 (m, 6H), 1.63 – 1.51 (m, 2H), 1.02 (s, 3H), 0.86 (s, 3H), 0.85 (s, 3H). <sup>13</sup>C NMR (100 MHz, CDCl<sub>3</sub>) δ 167.19, 165.98, 160.19, 145.11, 138.91, 137.94, 135.72, 134.68, 134.49, 134.12, 131.07, 123.70, 121.51, 119.93, 116.38, 113.23, 102.70, 81.51, 63.57, 52.72, 49.03, 47.09, 45.15, 38.90, 33.82, 27.15, 20.24, 20.12, 11.61. HRMS (ESI): calc. for [(C<sub>29</sub>H<sub>31</sub>NO<sub>5</sub>S)] (M+H) 506.2001, measured 506.1960.

**Methyl 2-(((*E*)-3-(3-(((*E*)-2-((2-cyanophenoxy)methyl)-3-methoxy-3-oxoprop-1-en-1-yl)phenyl)acryloyl)oxy)benzoate (3s)**

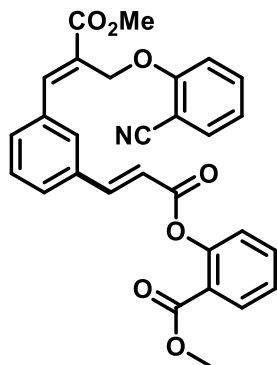

Yellow liquid; Yield (65%),  $^1\text{H}$  NMR (400 MHz,  $\text{CDCl}_3$ )  $\delta$  8.10 (s, 1H), 8.03 (dd,  $J = 7.9$ , 1.4 Hz, 1H), 7.83 (d,  $J = 16.0$  Hz, 1H), 7.69 (s, 1H), 7.62 – 7.45 (m, 6H), 7.33 (t,  $J = 7.6$  Hz, 1H), 7.16 (d,  $J = 8.1$  Hz, 1H), 7.09 (d,  $J = 8.4$  Hz, 1H), 7.02 (t,  $J = 7.6$  Hz, 1H), 6.58 (d,  $J = 16.0$  Hz, 1H), 4.96 (s, 2H), 3.88 (s, 3H), 3.81 (s, 3H).  $^{13}\text{C}$  NMR (100 MHz,  $\text{CDCl}_3$ )  $\delta$  167.11, 165.17, 165.12, 160.07, 150.57, 145.81, 145.75, 135.07, 134.86, 134.47, 134.08, 133.95, 131.89, 131.67, 129.63, 129.54, 129.37, 127.35, 126.16, 123.91, 123.52, 121.63, 118.18, 116.35, 113.37, 102.77, 63.95, 52.66, 52.34. HRMS (ESI): calc. for  $[(\text{C}_{29}\text{H}_{23}\text{NO}_7)]$  (M+H) 498.1553, measured 498.1518.

**Methyl (*E*)-3-(3-(((*E*)-3-(2-cinnamoylphenoxy)-3-oxoprop-1-en-1-yl)phenyl)-2-((2-cyanophenoxy)methyl)acrylate (3t)**

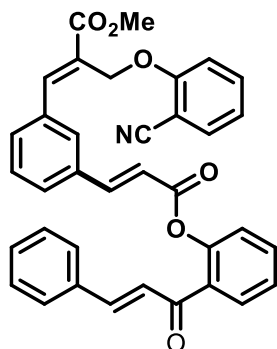

Yellow liquid; Yield (58%),  $^1\text{H}$  NMR (400 MHz,  $\text{CDCl}_3$ )  $\delta$  8.05 (s, 1H), 7.74 – 7.70 (m, 2H), 7.59 – 7.51 (m, 10H), 7.43 – 7.31 (m, 5H), 7.16 (d,  $J = 16.0$  Hz, 2H), 7.10 – 6.99 (m, 3H), 6.43 (d,  $J = 16.0$  Hz, 1H), 4.92 (s, 2H), 3.88 (s, 3H).  $^{13}\text{C}$  NMR (100 MHz,  $\text{CDCl}_3$ )  $\delta$  191.77, 167.12, 164.82, 160.06, 148.77, 146.25, 145.71, 145.42, 134.98, 134.64, 134.61, 134.49, 134.08, 132.62, 132.54, 131.67, 130.74, 130.03, 129.70, 129.56, 129.50, 129.33, 129.03, 128.56, 128.28, 127.34, 126.22, 125.71, 123.53, 121.67, 117.88, 116.37, 113.38, 102.77, 63.92, 52.68. HRMS (ESI): calc. for  $[(\text{C}_{36}\text{H}_{27}\text{NO}_6)]$  (M+H) 570.1917, measured 570.1875.

**Methyl (E)-3-(3-((E)-3-(4-acetamidophenoxy)-3-oxoprop-1-en-1-yl)phenyl)-2-((2-cyanophenoxy)methyl)acrylate (3u)**

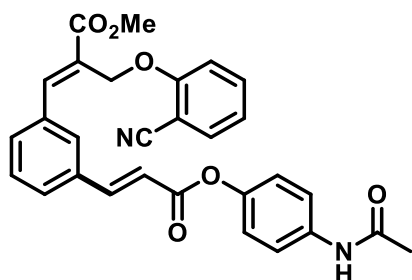

White solid, Yield (60%), M.P (121 °C) ,  $^1\text{H}$  NMR (400 MHz,  $\text{CDCl}_3$ )  $\delta$  8.11 (s, 1H), 7.80 (t,  $J = 11.2$  Hz, 1H), 7.70 (s, NH), 7.63 – 7.43 (m, 7H), 7.13 – 7.01 (m, 4H), 6.49 (d,  $J = 12.0$  Hz, 1H), 4.96 (s, 2H), 3.88 (s, 3H), 2.14 (s, 3H).  $^{13}\text{C}$  NMR (100 MHz,  $\text{CDCl}_3$ )  $\delta$  168.89, 167.15, 165.42, 160.03, 146.76, 145.86, 145.74, 135.95, 135.06, 134.76, 134.59, 134.09, 131.76, 129.65, 129.14, 127.26, 121.93, 121.67, 121.00, 118.26, 116.44, 113.29, 102.58, 63.90, 52.69, 24.44. HRMS (ESI): calc. for  $[(\text{C}_{29}\text{H}_{24}\text{N}_2\text{O}_6)]$  (M+H) 497.1713, measured 497.1743.

**Methyl (E)-2-((2-cyanophenoxy)methyl)-3-(3-((E)-3-(((8R,9S,13S,14S)-13-methyl-17-oxo-7,8,9,11,12,13,14,15,16,17-decahydro-6H-cyclopenta[a]phenanthren-3-yl)oxy)-3-oxoprop-1-en-1-yl)phenyl)acrylate (3v)**

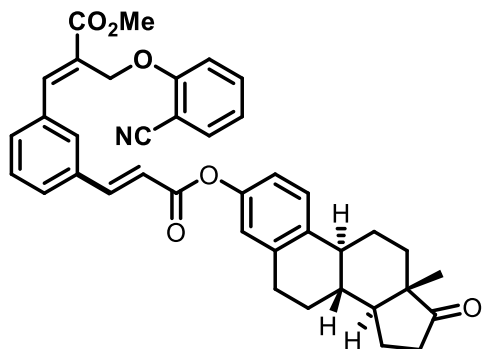

Colourless liquid, Yield (54%),  $^1\text{H}$  NMR (400 MHz,  $\text{CDCl}_3$ )  $\delta$  8.11 (s, 1H), 7.78 (d,  $J = 16.0$  Hz, 1H), 7.70 (s, 1H), 7.61 – 7.44 (m, 5H), 7.32 (d,  $J = 8.4$  Hz, 1H), 7.10 (d,  $J = 8.4$  Hz, 1H), 7.04 (td,  $J = 7.6, 0.7$  Hz, 1H), 6.94 – 6.86 (m, 2H), 6.49 (d,  $J = 16.0$  Hz, 1H), 4.96 (s, 2H), 3.89 (s, 3H), 3.06 – 2.76 (m, 3H), 2.63 – 2.29 (m, 4H), 2.21 – 1.96 (m, 3H), 1.75 – 1.44 (m, 7H), 0.92 (s, 3H).  $^{13}\text{C}$  NMR (100 MHz,  $\text{CDCl}_3$ )  $\delta$  167.14, 165.45, 160.08, 148.70, 145.84, 145.47, 138.15, 137.53, 135.13, 134.91, 134.50, 134.15, 131.69, 129.67, 129.60, 129.14, 127.37, 126.55, 121.70, 121.66, 118.86, 118.54, 116.37, 113.36, 102.81, 63.97, 52.70, 50.55, 48.08, 44.29, 38.13, 35.99, 31.67, 29.55, 26.47, 25.88, 21.71, 13.96. HRMS (ESI): calc. for  $[(\text{C}_{39}\text{H}_{37}\text{NO}_6)]$  (M+H) 616.2699, measured 616.2704

**Methyl (E)-2-((2-cyanophenoxy)methyl)-3-(3-((E)-3-(2-isopropyl-5-methylphenoxy)-3-oxoprop-1-en-1-yl)phenyl)acrylate (3w)**

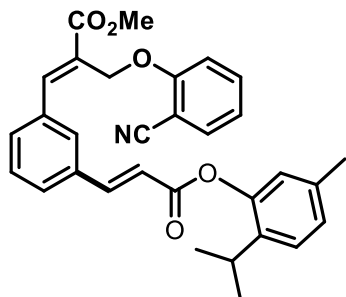

Yellow liquid, Yield (69%),  $^1\text{H}$  NMR (400 MHz,  $\text{CDCl}_3$ )  $\delta$  8.13 (s, 1H), 7.81 (d,  $J = 16.0$  Hz, 1H), 7.72 (s, 1H), 7.60 – 7.48 (m, 5H), 7.23 (d,  $J = 7.9$  Hz, 1H), 7.11 (d,  $J = 8.4$  Hz, 1H), 7.06 – 7.03 (m, 1H), 6.86 (d,  $J = 1.0$  Hz, 1H), 6.56 (d,  $J = 16.0$  Hz, 1H), 4.97 (s, 2H), 3.89 (s, 3H), 3.04 – 2.96 (m, 1H), 2.33 (s, 3H), 1.20 (d,  $J = 6.9$  Hz, 6H).  $^{13}\text{C}$  NMR (100 MHz,  $\text{CDCl}_3$ )  $\delta$  167.12, 165.50, 160.02, 147.91, 145.83, 145.51, 137.19, 136.67, 135.06, 134.82, 134.48, 134.07, 131.67, 129.64, 129.14, 127.28, 126.55, 122.78, 121.61, 120.38, 118.34, 116.33, 113.26, 102.66, 63.88, 52.67, 27.17, 23.16, 20.94. HRMS (ESI): calc. for  $[(\text{C}_{31}\text{H}_{29}\text{NO}_5)]$  (M+H) 496.2124, measured 496.2123.

**Methyl (E)-3-(3-((E)-3-(benzo[d][1,3]dioxol-5-yloxy)-3-oxoprop-1-en-1-yl)phenyl)-2-((2-cyanophenoxy)methyl)acrylate (3x)**

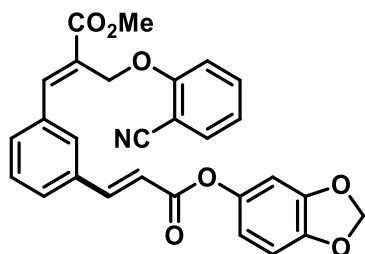

Brown liquid, Yield (51%),  $^1\text{H}$  NMR (400 MHz,  $\text{CDCl}_3$ )  $\delta$  8.10 (s, 1H), 7.77 (d,  $J = 16.0$  Hz, 1H), 7.69 (s, 1H), 7.59 – 7.46 (m, 5H), 7.10 – 7.01 (m, 2H), 6.79 (d,  $J = 8.4$  Hz, 1H), 6.65 (d,  $J = 2.3$  Hz, 1H), 6.58 (dd,  $J = 8.4, 2.3$  Hz, 1H), 6.46 (d,  $J = 16.0$  Hz, 1H), 5.98 (s, 2H), 4.95 (s, 2H), 3.88 (s, 3H).  $^{13}\text{C}$  NMR (100 MHz,  $\text{CDCl}_3$ )  $\delta$  167.10, 165.41, 160.02, 148.08, 145.80, 145.61, 145.43, 145.06, 135.08, 134.79, 134.49, 134.10, 131.71, 129.63, 129.59, 129.11, 127.31, 121.62, 118.23, 116.35, 113.99, 113.31, 108.07, 103.82, 102.71, 101.80, 63.91, 52.67. HRMS (ESI): calc. for  $[(\text{C}_{28}\text{H}_{21}\text{NO}_7)]$  (M+H) 484.1396, measured 484.1385.

**Methyl (E)-2-((2-cyanophenoxy) methyl)-3-(3-(1,4-dioxo-1,4-dihydronaphthalen-2-yl)phenyl)acrylate (10a)**

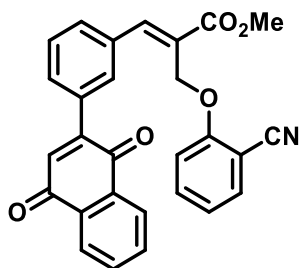

Yellow solid, Yield (77%), M.P (75 °C),  $^1\text{H}$  NMR (400 MHz,  $\text{CDCl}_3$ )  $\delta$  8.13 (s, 1H), 8.09 – 8.07 (m, 1H), 8.00 – 7.95 (m, 1H), 7.76 – 7.73 (m, 3H), 7.62-7.49 (m, 6H), 7.17 (d,  $J = 8.5$  Hz, 1H), 7.04 – 6.98 (m, 2H), 5.03 (s, 1H), 3.88 (s, 3H).  $^{13}\text{C}$  NMR (100 MHz,  $\text{CDCl}_3$ )  $\delta$  184.90, 184.12, 167.19, 160.23, 147.29, 145.92, 135.50, 134.42, 134.40, 134.01, 133.95, 133.88, 132.30, 132.08, 131.17, 130.88, 130.52, 129.11, 127.23, 127.03, 126.09, 121.37, 116.37, 113.50, 102.64, 63.92, 52.63. HRMS (ESI): calc. for  $[(\text{C}_{28}\text{H}_{19}\text{NO}_5)]$  (M+H) 450.1341, measured 450.1363.

**Methyl (*E*)-2-((2-cyanophenoxy) methyl)-3-(5-(1,4-dioxo-1,4-dihydronaphthalen-2-yl)-2-methylphenyl) acrylate (10b)**

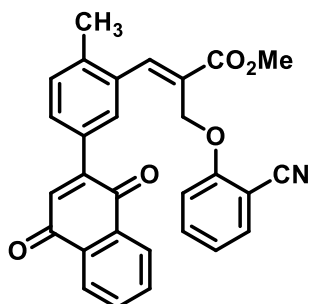

Yellow solid, Yield (74%), M.P (94 °C),  $^1\text{H}$  NMR (400 MHz,  $\text{CDCl}_3$ )  $\delta$  8.18 (s, 1H), 8.09 – 8.06 (m, 1H), 7.91 – 7.88 (m, 1H), 7.76 – 7.70 (m, 2H), 7.62 (d,  $J = 1.3$  Hz, 1H), 7.53 – 7.44 (m, 3H), 7.33 (d,  $J = 7.9$  Hz, 1H), 7.08 (d,  $J = 8.5$  Hz, 1H), 6.97 (t,  $J = 7.6$  Hz, 1H), 6.91 (s, 1H), 5.00 (s, 2H), 3.90 (s, 3H), 2.39 (s, 3H).  $^{13}\text{C}$  NMR (100 MHz,  $\text{CDCl}_3$ ):  $\delta$  184.97, 184.24, 167.04, 160.30, 147.35, 144.60, 139.52, 134.87, 134.31, 133.91, 133.86, 133.83, 133.64, 132.40, 132.16, 131.31, 130.63, 130.56, 130.25, 128.06, 126.98, 126.04, 121.13, 116.35, 113.24, 102.55, 63.91, 52.64, 20.08. HRMS (ESI): calc. for  $[(\text{C}_{29}\text{H}_{21}\text{NO}_5)]$  (M+H) 464.1498, measured 464.1487.

**Methyl (*E*)-2-((2-cyanophenoxy)methyl)-3-(5-(1,4-dioxo-1,4-dihydronaphthalen-2-yl)-2-methoxyphenyl)acrylate (10c)**



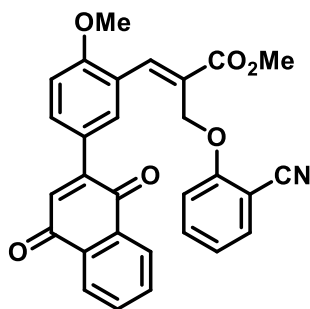

Yellow liquid, Yield (80%),  $^1\text{H}$  NMR (400 MHz,  $\text{CDCl}_3$ )  $\delta$  8.27 (s, 1H), 8.09 – 8.04 (m, 1H), 7.86 – 7.83 (m, 1H), 7.79 – 7.67 (m, 3H), 7.61 (dd,  $J = 8.6, 2.3$  Hz, 1H), 7.57 – 7.47 (m, 3H), 7.17 (d,  $J = 8.4$  Hz, 1H), 7.05 – 6.97 (m, 2H), 6.89 (s, 1H), 5.06 (s, 2H), 3.94 (s, 3H), 3.88 (s, 3H).  $^{13}\text{C}$  NMR (100 MHz,  $\text{CDCl}_3$ )  $\delta$  184.97, 184.51, 167.31, 160.44, 159.44, 146.96, 141.77, 134.35, 134.13, 133.91, 133.87, 133.71, 132.59, 132.55, 132.34, 132.28, 127.09, 126.99, 126.03, 125.86, 123.60, 121.13, 116.40, 113.40, 110.76, 102.65, 64.32, 56.00, 52.55. HRMS (ESI): calc. for  $[(\text{C}_{29}\text{H}_{29}\text{NO}_6)]$  (M+H) 480.1447, measured 480.1437.

**Methyl (*E*)-2-((2-cyanophenoxy)methyl)-3-(5-(1,4-dioxo-1,4-dihydronaphthalen-2-yl)-2-fluorophenyl)acrylate (10d)**

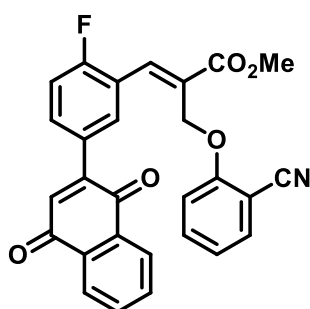

Yellow solid, Yield (66%), M.P (104 °C),  $^1\text{H}$  NMR (400 MHz,  $\text{CDCl}_3$ )  $\delta$  8.16 (s, 1H), 8.07 – 8.04 (m, 1H), 7.85 – 7.70 (m, 5H), 7.98- 7.46 (m, 4H), 7.46 (dd,  $J = 7.7, 1.6$  Hz, 1H), 7.23 – 6.99 (m, 5H), 6.93 (s, 1H), 5.07 (s, 2H), 3.89 (s, 3H).  $^{13}\text{C}$  NMR (100 MHz,  $\text{CDCl}_3$ )  $\delta$  184.70, 183.98, 166.70, 162.88, 160.07, 146.25, 138.22, 135.22, 134.40, 134.00, 133.85, 133.80, 132.61, 132.18, 132.05, 129.82, 128.98, 126.94, 126.06, 122.50, 122.36, 121.33, 116.22, 115.92, 113.34, 102.49, 63.87, 52.72. HRMS (ESI): calc. for  $[(\text{C}_{28}\text{H}_{18}\text{FNO}_5)]$  (M+H) 468.1247, measured 468.1241.

**Methyl (*E*)-3-(2-chloro-5-(1,4-dioxo-1,4-dihydronaphthalen-2-yl)phenyl)-2-((2-cyanophenoxy)methyl)acrylate (10e)**

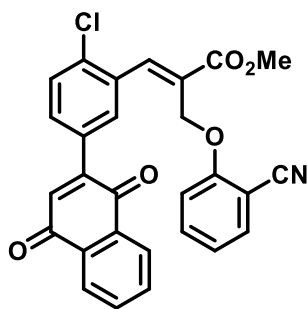

Yellow solid, Yield (69%), M.P (96 °C),  $^1\text{H}$  NMR (400 MHz,  $\text{CDCl}_3$ )  $\delta$  8.21 (s, 1H), 8.07 (dd,  $J = 7.4, 1.5$  Hz, 1H), 7.87 – 7.68 (m, 4H), 7.55 – 7.45 (m, 5H), 7.15 (d,  $J = 8.5$  Hz, 1H), 7.00 (t,  $J = 7.6$  Hz, 1H), 6.92 (s, 1H), 5.01 (s, 2H), 3.90 (s, 3H).  $^{13}\text{C}$  NMR (100 MHz,  $\text{CDCl}_3$ )  $\delta$  184.71, 183.84, 166.71, 160.15, 146.34, 142.57, 136.20, 135.47, 134.43, 134.08, 133.95, 132.92, 132.37, 132.25, 131.40, 129.92, 128.94, 127.30, 127.01, 126.16, 121.32, 116.30, 113.32, 102.53, 63.89, 52.80, 29.81. HRMS (ESI): calc. for  $[(\text{C}_{28}\text{H}_{18}\text{ClNO}_5)]$  (M+H) 484.0952, measured 484.0961.

**Methyl (*E*)-2-((2-cyanophenoxy)methyl)-3-(3-(1,4-dioxo-1,4-dihydronaphthalen-2-yl)-4-methoxyphenyl)acrylate (10f)**

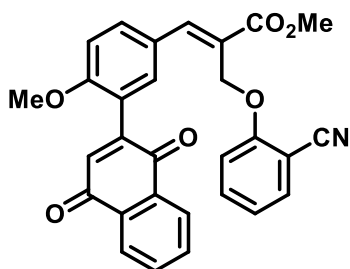

Yellow solid, Yield (72%), M.P (67 °C),  $^1\text{H}$  NMR (400 MHz,  $\text{CDCl}_3$ )  $\delta$  8.11 – 8.06 (m, 2H), 8.03 – 7.99 (m, 1H), 7.79 – 7.65 (m, 4H), 7.55 – 7.45 (m, 4H), 7.19 (d,  $J = 8.5$  Hz, 1H), 7.05 – 6.99 (m, 2H), 6.97 (d,  $J = 1.9$  Hz, 2H), 5.03 (s, 2H), 3.85 (s, 3H), 3.81 (s, 3H).  $^{13}\text{C}$  NMR (100 MHz,  $\text{CDCl}_3$ )  $\delta$  185.09, 183.47, 167.58, 160.24, 158.75, 146.66, 146.19, 137.20, 134.44, 133.86, 133.81, 133.78, 133.22, 132.80, 132.42, 132.15, 126.99, 126.73, 126.13, 124.76, 123.55, 121.36, 116.40, 113.64, 111.63, 102.65, 64.21, 56.04, 52.51. HRMS (ESI): calc. for  $[(\text{C}_{29}\text{H}_{21}\text{NO}_5)]$  (M+H) 480.1447, measured 480.1472.

**Methyl (*E*)-2-((2-cyanophenoxy) methyl)-3-(3-(1,4-dioxo-1,4-dihydronaphthalen-2-yl)-4-isopropylphenyl)acrylate (10g)**

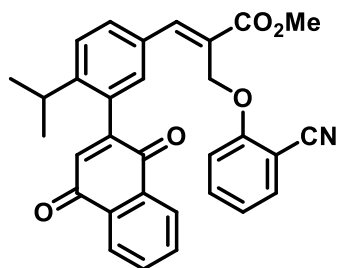

Yellow liquid, Yield (68%),  $^1\text{H}$  NMR (400 MHz,  $\text{CDCl}_3$ )  $\delta$  8.14 – 8.11 (m, 1H), 8.08 (s, 1H), 8.06 – 8.03 (m, 1H), 7.79 – 7.76 (m, 3H), 7.59 – 5.39 (m, 5H), 7.30 (d,  $J = 1.8$  Hz, 1H), 7.11 (d,  $J = 8$  Hz, 1H), 6.93 – 6.89 (m, 1H), 6.85 (s, 1H), 4.97 (s, 2H), 3.85 (s, 3H), 2.74 (dt,  $J = 13.3, 6.7$  Hz, 1H), 1.18 (d,  $J = 5.6$  Hz, 6H).  $^{13}\text{C}$  NMR (100 MHz,  $\text{CDCl}_3$ )  $\delta$  184.85, 184.35, 167.38, 160.13, 149.89, 149.40, 146.27, 137.15, 134.85, 134.39, 134.06, 133.99, 133.80, 133.13, 132.24, 132.08, 131.82, 130.99, 130.60, 127.11, 126.40, 126.31, 126.27, 121.35, 116.28, 113.52, 102.62, 64.20, 55.40, 52.57, 31.48. HRMS (ESI): calc. for  $[(\text{C}_{31}\text{H}_{25}\text{NO}_5)]$  (M+H) 492.1811, measured 492.1838.

**Methyl (E)-3-(4-chloro-3-(1,4-dioxo-1,4-dihydronaphthalen-2-yl)phenyl)-2-((2-cyanophenoxy)methyl)acrylate (10h)**

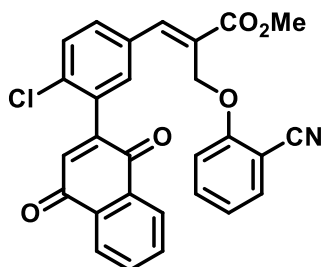

Yellow solid, Yield (66%), M.P (72 °C),  $^1\text{H}$  NMR (400 MHz,  $\text{CDCl}_3$ )  $\delta$  8.25 – 7.99 (m, 4H), 7.80 – 7.72 (m, 3H), 7.65 – 7.40 (m, 5H), 7.15 (d,  $J = 8.5$  Hz, 1H), 7.01 – 6.96 (m, 1H), 6.94 (s, 1H), 4.96 (s, 2H), 3.86 (s, 3H), 3.75 (s, 3H).  $^{13}\text{C}$  NMR (100 MHz,  $\text{CDCl}_3$ )  $\delta$  184.65, 183.05, 166.98, 160.01, 146.98, 144.91, 137.78, 137.65, 135.99, 134.92, 134.48, 134.12, 133.83, 133.53, 133.00, 132.13, 132.04, 131.60, 131.13, 130.44, 129.68, 127.69, 127.11, 126.32, 121.75, 121.60, 116.25, 113.63, 102.69, 63.95, 52.71. HRMS (ESI): calc. for  $[(\text{C}_{28}\text{H}_{18}\text{ClNO}_5)]$  (M+H) 484.0952, measured 484.0948.

**Methyl (E)-3-(4-bromo-3-(1,4-dioxo-1,4-dihydronaphthalen-2-yl)phenyl)-2-((2-cyanophenoxy)methyl)acrylate (10i)**

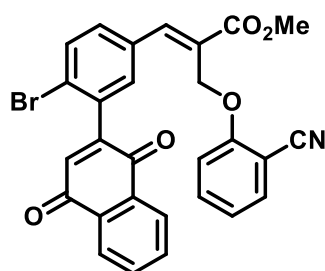

Yellow solid, Yield (69%), M.P (71 °C),  $^1\text{H}$  NMR (400 MHz,  $\text{CDCl}_3$ )  $\delta$  8.13 – 7.99 (m, 4H), 7.79 – 7.68 (m, 4H), 7.59 – 7.38 (m, 8H), 7.15 – 7.02 (m, 3H), 6.98 – 6.93 (m, 2H), 6.91 (s, 1H), 4.95 (s, 2H), 4.92 (s, 1H), 3.86 (s, 3H). 3.85 (s, 1H).  $^{13}\text{C}$  NMR (100 MHz,  $\text{CDCl}_3$ )  $\delta$  184.66, 182.99, 167.14, 166.95, 160.22, 160.02, 148.53, 145.49, 144.89, 138.76, 137.56, 135.76, 134.80, 134.45, 134.09, 134.06, 134.02, 133.94, 133.80, 133.61, 133.58, 133.13, 132.17, 132.08, 131.78, 131.54, 131.29, 127.86, 127.11, 126.97, 126.49, 126.32, 124.62, 124.51, 121.63, 116.33, 116.19, 113.71, 102.93, 102.77, 64.02, 52.68. HRMS (ESI): calc. for  $[(\text{C}_{28}\text{H}_{18}\text{BrNO}_5)]$  (M+H) 528.0447, measured 528.0438.

**Ethyl** (E)-2-((2-cyanophenoxy)methyl)-3-(3-(1,4-dioxo-1,4-dihydronaphthalen-2-yl)phenyl) acrylate (10j)

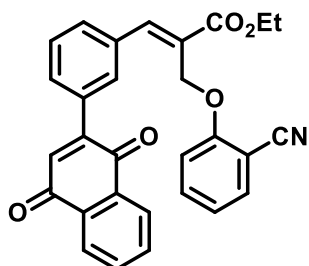

Yellow solid, Yield (73%), M.P (124 °C),  $^1\text{H}$  NMR (400 MHz,  $\text{CDCl}_3$ )  $\delta$  8.13 (s, 1H), 8.11 – 8.07 (m, 1H), 8.02 – 7.98 (m, 1H), 7.79 – 7.73 (m, 3H), 7.64 – 7.50 (m, 5H), 7.17 (d,  $J = 8.4$  Hz, 1H), 7.03 – 6.99 (m, 2H), 5.04 (s, 2H), 4.34 (q,  $J = 7.1$  Hz, 2H), 1.36 (t,  $J = 7.1$  Hz, 3H).  $^{13}\text{C}$  NMR (100 MHz,  $\text{CDCl}_3$ )  $\delta$  184.96, 184.21, 166.75, 160.36, 147.41, 145.54, 135.58, 134.58, 134.40, 134.03, 134.00, 133.98, 133.91, 132.41, 132.18, 131.18, 130.91, 130.48, 129.13, 127.70, 127.09, 126.15, 121.38, 116.39, 113.63, 102.78, 64.04, 61.65, 14.39. HRMS (ESI): calc. for  $[(\text{C}_{29}\text{H}_{21}\text{NO}_5)]$  (M+H) 464.1498, measured 464.1499.

**Butyl** (E)-2-((2-cyanophenoxy)methyl)-3-(3-(1,4-dioxo-1,4-dihydronaphthalen-2-yl)phenyl)acrylate (10k)

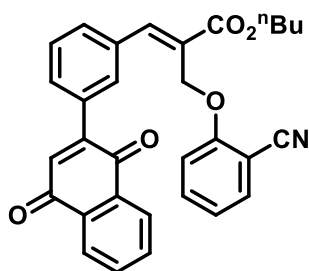

Yellow solid, Yield (72%), M.P (99 °C),  $^1\text{H}$  NMR (400 MHz,  $\text{CDCl}_3$ )  $\delta$  8.46 (s, 1H), 8.45 – 8.41 (m, 1H), 8.36 – 8.32 (m, 1H), 8.12 – 8.06 (m, 3H), 7.97 (d,  $J = 7.8$  Hz, 1H), 7.92 – 7.84 (m, 4H), 7.51 (d,  $J = 8.4$  Hz, 1H), 7.40 – 7.33 (m, 2H), 5.37 (s, 2H), 4.62 (t,  $J = 6.6$  Hz, 2H), 2.10 – 2.00 (m, 2H), 1.77 (dd,  $J = 15.0, 7.5$  Hz, 2H), 1.29 (t,  $J = 7.4$  Hz, 3H).  $^{13}\text{C}$  NMR (100 MHz,  $\text{CDCl}_3$ )  $\delta$  184.97, 184.20, 166.81, 160.32, 147.39, 145.57, 135.56, 134.54, 134.42, 133.96, 133.91, 132.36, 132.14, 131.18, 130.91, 130.47, 129.12, 127.63, 127.08, 126.14, 121.34, 116.40, 113.49, 102.66, 65.52, 63.99, 30.78, 19.34, 13.86. HRMS (ESI): calc. for  $[(\text{C}_{31}\text{H}_{25}\text{NO}_5)]$  (M+H) 492.1811, measured 492.1837.

**Ethyl** (*E*)-3-(4-chloro-3-(1,4-dioxo-1,4-dihydronaphthalen-2-yl)phenyl)-2-((2-cyanophenoxy)methyl)acrylate (**10l**)

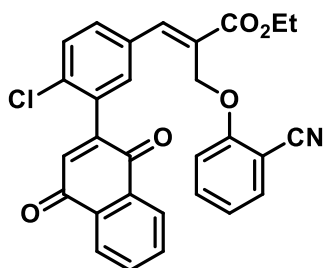

Yellow solid, Yield (68%), M.P (123 °C),  $^1\text{H}$  NMR (400 MHz,  $\text{CDCl}_3$ )  $\delta$  8.12 (d,  $J = 6.7$  Hz, 1H), 8.05 (d,  $J = 10.0$  Hz, 2H), 7.83 – 7.74 (m, 2H), 7.57 – 7.51 (m, 4H), 7.45 (d,  $J = 7.6$  Hz, 1H), 7.16 (d,  $J = 8.5$  Hz, 1H), 6.98 (d,  $J = 7.9$  Hz, 1H), 6.96 (s, 1H), 4.97 (s, 2H), 4.33 (q,  $J = 7.1$  Hz, 2H), 1.35 (t,  $J = 7.1$  Hz, 3H).  $^{13}\text{C}$  NMR (100 MHz,  $\text{CDCl}_3$ )  $\delta$  184.72, 183.11, 166.55, 160.14, 147.08, 144.58, 137.84, 134.89, 134.48, 134.14, 134.10, 133.86, 133.57, 133.15, 132.18, 132.11, 132.08, 131.62, 130.47, 128.08, 127.16, 126.38, 121.60, 116.30, 113.72, 102.78, 64.02, 61.78, 14.38. HRMS (ESI): calc. for  $[(\text{C}_{29}\text{H}_{20}\text{ClNO}_5)]$  (M+K) 536.0667, measured 536.0606.

**Methyl** (*E*)-2-((2-cyanophenoxy)methyl)-3-(2',5'-dioxo-2',5'-dihydro-[1,1'-biphenyl]-3-yl)acrylate (**10m**)

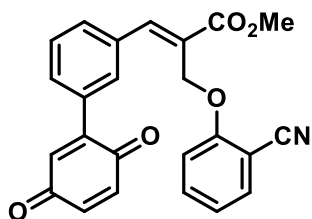

Yellow solid, Yield (66%), M.P (99 °C),  $^1\text{H}$  NMR (400 MHz,  $\text{CDCl}_3$ )  $\delta$  8.10 (s, 1H), 7.65 (s, 1H), 7.59 – 7.48 (m, 5H), 7.15 (d,  $J = 8.3$  Hz, 1H), 7.03 (t,  $J = 7.6$  Hz, 1H), 6.79 (s, 3H), 5.01 (s, 2H), 3.87 (s, 3H).  $^{13}\text{C}$  NMR (100 MHz,  $\text{CDCl}_3$ )  $\delta$  187.36, 186.36, 167.22, 160.25, 145.79, 145.28, 137.03, 136.39, 134.57, 134.45, 133.91, 133.37, 133.09, 131.30, 130.59, 130.43, 129.16, 127.40, 121.54, 116.37, 113.67, 102.81, 64.03, 52.64. HRMS (ESI): calc. for  $[(\text{C}_{24}\text{H}_{17}\text{NO}_5)]$  (M+H) 400.1185, measured 400.1173.

**Ethyl (E)-2-((2-cyanophenoxy)methyl)-3-(2',5'-dioxo-2',5'-dihydro-[1,1'-biphenyl]-3-yl)acrylate (10n)**

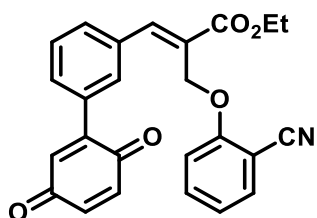

Yellow liquid, Yield (64%),  $^1\text{H}$  NMR (400 MHz,  $\text{CDCl}_3$ )  $\delta$  8.10 (s, 1H), 7.66 (s, 1H), 7.61 – 7.48 (m, 5H), 7.16 (d,  $J = 8.4$  Hz, 1H), 7.03 (t,  $J = 7.6$  Hz, 1H), 6.80 (d,  $J = 1.0$  Hz, 3H), 5.01 (s, 2H), 4.33 (q,  $J = 7.1$  Hz, 2H), 1.35 (t,  $J = 7.1$  Hz, 3H).  $^{13}\text{C}$  NMR (100 MHz,  $\text{CDCl}_3$ )  $\delta$  187.42, 186.41, 166.75, 160.29, 145.47, 145.30, 137.05, 136.40, 134.64, 134.45, 133.90, 133.32, 133.09, 131.30, 130.60, 130.37, 129.16, 127.68, 121.49, 116.42, 113.64, 102.73, 64.00, 61.68, 14.37. HRMS (ESI): calc. for  $[(\text{C}_{25}\text{H}_{19}\text{NO}_5)]$  (M+H) 414.1341, measured 414.1331.

**Methyl (E)-2-((2-cyanophenoxy)methyl)-3-(4-methyl-2',5'-dioxo-2',5'-dihydro-[1,1'-biphenyl]-3-yl)acrylate (10o)**

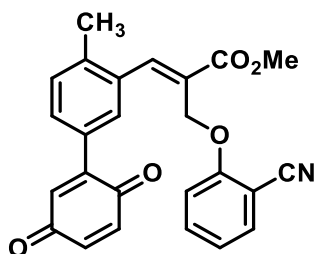

Yellow liquid, Yield (71%),  $^1\text{H}$  NMR (400 MHz,  $\text{CDCl}_3$ )  $\delta$  8.10 (s, 1H), 7.48 - 7.42 (m, 3H), 7.33 (d,  $J = 7.9$  Hz, 1H), 7.26 – 7.22 (m, 1H), 7.02 – 6.93 (m, 2H), 6.70 (d,  $J = 3.5$  Hz, 2H), 6.63 (s, 1H), 4.90 (s, 2H), 3.84 (s, 3H), 2.31 (s, 3H).  $^{13}\text{C}$  NMR (100 MHz,  $\text{CDCl}_3$ )  $\delta$  187.42,

186.50, 167.00, 160.21, 145.26, 144.53, 139.56, 136.97, 136.32, 134.34, 133.88, 133.79, 132.42, 130.68, 130.57, 130.22, 130.18, 128.11, 121.33, 116.35, 113.27, 102.59, 63.94, 52.62, 20.02. HRMS (ESI): calc. for [(C<sub>25</sub>H<sub>19</sub>NO<sub>5</sub>)] (M+H) 414.1341, measured 414.1331.

**Methyl (E)-2-((2-cyanophenoxy)methyl)-3-(6-methyl-2',5'-dioxo-2',5'-dihydro-[1,1'-biphenyl]-3-yl)acrylate (10p)**

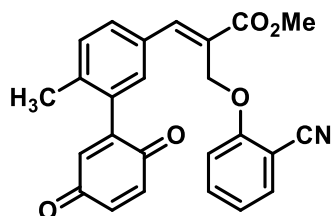

Yellow liquid, Yield (75%), <sup>1</sup>H NMR (400 MHz, CDCl<sub>3</sub>) δ 8.06 (s, 1H), 7.54 – 7.29 (m, 5H), 7.14 (d, *J* = 8.9 Hz, 1H), 7.01 (t, *J* = 7.5 Hz, 1H), 6.80 (d, *J* = 2.2 Hz, 2H), 6.63 (d, *J* = 1.8 Hz, 1H), 4.96 (s, 2H), 3.85 (s, 3H), 2.18 (s, 3H). <sup>13</sup>C NMR (100 MHz, CDCl<sub>3</sub>) δ 187.40, 186.03, 167.34, 160.17, 147.38, 146.15, 138.51, 136.80, 136.46, 134.83, 134.47, 133.85, 133.68, 131.99, 131.05, 130.79, 130.71, 126.42, 121.52, 113.70, 102.70, 64.17, 52.56, 20.35. HRMS (ESI): calc. for [(C<sub>25</sub>H<sub>19</sub>NO<sub>5</sub>)] (M+H) 414.1341, measured 414.1331.

**Methyl (E)-2-((2-cyanophenoxy)methyl)-3-(6-fluoro-2',5'-dioxo-2',5'-dihydro-[1,1'-biphenyl]-3-yl)acrylate (10q)**

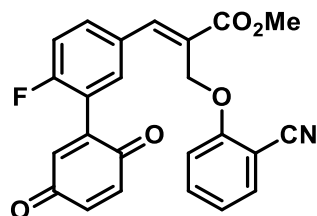

Yellow solid, Yield (61%), M.P (128 °C), <sup>1</sup>H NMR (400 MHz, CDCl<sub>3</sub>) δ 8.05 (s, 1H), 7.61 – 7.52 (m, 4H), 7.23 – 7.18 (m, 2H), 7.06 – 7.02 (m, 1H), 6.82 (d, *J* = 4.1 Hz, 3H), 4.99 (s, 2H), 3.87 (s, 3H). <sup>13</sup>C NMR (100 MHz, CDCl<sub>3</sub>) δ 187.02, 185.01, 167.15, 162.07, 160.14, 159.53, 144.97, 141.43, 136.90, 136.46, 135.51, 135.48, 134.54, 133.87, 133.40, 133.31, 133.02, 132.99, 130.62, 130.58, 127.07, 121.70, 121.53, 121.38, 116.96, 116.74, 116.37, 113.78, 102.79, 63.96, 52.70. HRMS (ESI): calc. for [(C<sub>24</sub>H<sub>16</sub>FNO<sub>5</sub>)] (M+H) 418.1091, measured 418.1078.

**Methyl (E)-2-((2-cyanophenoxy)methyl)-3-(6-bromo-2',5'-dioxo-2',5'-dihydro-[1,1'-biphenyl]-3-yl)acrylate (10r)**

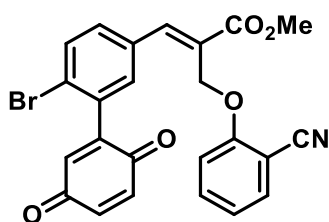

Yellow liquid, Yield (55%),  $^1\text{H}$  NMR (400 MHz,  $\text{CDCl}_3$ )  $\delta$  8.03 (s, 1H), 7.70 (d,  $J = 8.7$  Hz, 1H), 7.53 (d,  $J = 7.9$  Hz, 2H), 7.44 (d,  $J = 7.3$  Hz, 2H), 7.16 (d,  $J = 8.3$  Hz, 1H), 7.04 (t,  $J = 7.6$  Hz, 1H), 6.83 (s, 2H), 6.71 (s, 1H), 4.94 (s, 2H), 3.88 (s, 3H).  $^{13}\text{C}$  NMR (100 MHz,  $\text{CDCl}_3$ )  $\delta$  187.16, 185.02, 167.02, 160.06, 146.67, 144.97, 136.81, 136.63, 135.25, 135.18, 134.58, 133.92, 133.70, 133.65, 131.78, 127.88, 124.64, 121.79, 116.32, 113.79, 102.82, 96.26, 64.00, 52.79. HRMS (ESI): calc. for  $[(\text{C}_{24}\text{H}_{16}\text{BrNO}_5)]$  (M+H) 478.0290, measured 478.0280.

**Ethyl** (*E*)-3-(6-chloro-2',5'-dioxo-2',5'-dihydro-[1,1'-biphenyl]-3-yl)-2-((2-cyanophenoxy)methyl)acrylate (10s)

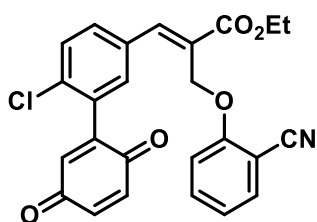

Yellow solid, Yield (65%), M.P (99 °C),  $^1\text{H}$  NMR (400 MHz,  $\text{CDCl}_3$ )  $\delta$  8.03 (s, 1H), 7.55 – 7.47 (m, 6H), 7.39-7.34 (m, 1H), 7.17 (d,  $J = 8.5$  Hz, 1H), 7.03 (t,  $J = 7.5$  Hz, 1H), 6.82 (s, 2H), 6.74 (s, 1H), 4.95 (s, 2H), 4.32 (q,  $J = 7.0$  Hz, 2H), 1.34 (t,  $J = 7.1$  Hz, 3H).  $^{13}\text{C}$  NMR (100 MHz,  $\text{CDCl}_3$ )  $\delta$  187.11, 185.04, 166.52, 160.10, 145.11, 144.51, 136.80, 136.54, 135.46, 134.79, 134.53, 133.85, 133.16, 132.92, 131.96, 131.79, 130.42, 128.06, 121.71, 116.32, 113.79, 102.74, 63.96, 61.78, 14.35. HRMS (ESI): calc. for  $[(\text{C}_{25}\text{H}_{18}\text{ClNO}_5)]$  (M+H) 448.0952, measured 448.1014.

**Methyl** (*E*)-3-(6'-(tert-butyl)-2',5'-dioxo-2',5'-dihydro-[1,1'-biphenyl]-3-yl)-2-((2-cyanophenoxy)methyl)acrylate (10t)

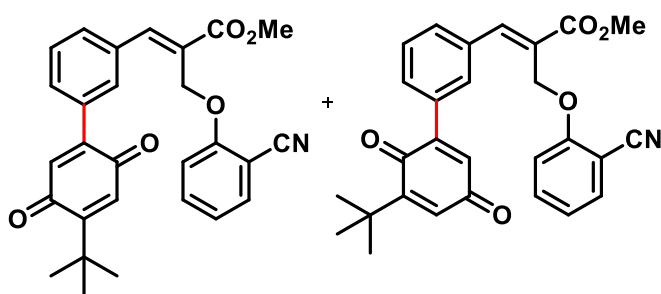



Yellow liquid, Yield (65%), (a:b = 76:24),  $^1\text{H}$  NMR (400 MHz,  $\text{CDCl}_3$ )  $\delta$  8.10 (s, 1H), 7.59 – 7.42 (m, 8H), 7.15 – 7.13 (m, 1H), 7.04– 7.00 (m, 1H), 6.70 (d,  $J = 2.6$  Hz, 1H), 6.62 (d,  $J = 2.6$  Hz, 1H), 5.01 (s, 1H), 3.86 (s, 3H), 1.22 (s, 9H).  $^{13}\text{C}$  NMR (100 MHz,  $\text{CDCl}_3$ )  $\delta$  188.07, 186.49, 167.19, 160.29, 156.27, 147.01, 145.72, 134.43, 134.33, 134.10, 133.93, 131.98, 131.64, 130.96, 130.70, 130.52, 129.01, 127.29, 121.44, 116.36, 113.45, 102.63, 64.03, 52.61, 35.64, 29.31. HRMS (ESI): calc. for  $[(\text{C}_{28}\text{H}_{25}\text{NO}_5)]$  (M+H) 456.1811, measured 456.1814.

**Methyl (E)-2-((2-cyanophenoxy)methyl)-3-(6'-methyl-2',5'-dioxo-2',5'-dihydro-[1,1'-biphenyl]-3-yl)acrylate (10u)**

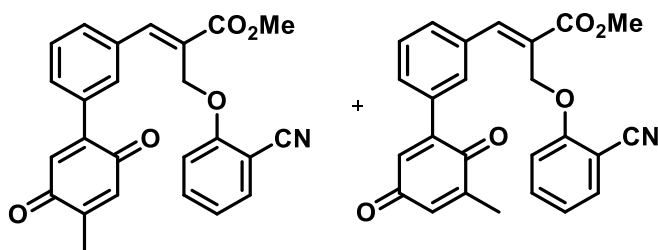

Yellow liquid, Yield (68%), (a:b = 54:46),  $^1\text{H}$  NMR (400 MHz,  $\text{CDCl}_3$ )  $\delta$  8.11 (s, 1H), 8.10 (s, 1H), 7.65 – 7.46 (m, 15H), 7.20 – 7.12 (m, 2H), 7.05 – 7.01 (m, 3H), 6.77 (s, 1H), 6.72 (d,  $J = 2.6$  Hz, 1H), 6.64 – 6.62 (m, 2H), 5.01 (s, 2H), 5.0 (s, 2H), 3.87 (s, 6H), 2.08 (d,  $J = 1.5$  Hz, 3H), 2.01 (d,  $J = 1.5$  Hz, 3H).  $^{13}\text{C}$  NMR (100 MHz,  $\text{CDCl}_3$ )  $\delta$  187.89, 187.40, 186.80, 186.61, 167.24, 160.27, 160.22, 146.19, 145.96, 145.88, 145.45, 145.11, 134.49, 134.45, 134.38, 133.93, 133.88, 133.75, 133.71, 133.33, 133.09, 131.14, 130.68, 130.63, 130.51, 130.32, 129.10, 127.27, 127.22, 121.48, 121.44, 116.43, 113.57, 113.53, 102.72, 102.66, 63.94, 52.65, 16.33, 15.58. HRMS (ESI): calc. for  $[(\text{C}_{25}\text{H}_{19}\text{NO}_5)]$  (M+H) 414.1341, measured 414.1328.

**Methyl (E)-3-(6'-(tert-butyl)-6-methyl-2',5'-dioxo-2',5'-dihydro-[1,1'-biphenyl]-3-yl)-2-((2-cyanophenoxy)methyl)acrylate (10v)**

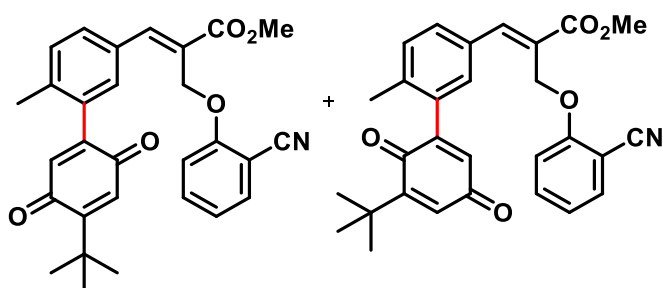

Yellow liquid, Yield (55%), (a:b = 51:49),  $^1\text{H}$  NMR (400 MHz,  $\text{CDCl}_3$ )  $\delta$  8.07 (s, 2H), 7.53 – 7.46 (m, 8H), 7.30 (d,  $J = 9.6$  Hz, 5H), 7.11 (d,  $J = 8.6$  Hz, 2H), 7.02 (t,  $J = 7.6$  Hz, 2H), 6.64 (d,  $J = 2.6$  Hz, 1H), 6.60 (s, 1H), 6.55 (d,  $J = 2.6$  Hz, 1H), 6.53 (s, 1H), 4.96 (d,  $J = 1.8$

Hz, 4H), 3.86 (s, 7H), 2.20 (s, 3H), 2.16 (s, 3H), 1.32 (s, 8H), 1.27 (s, 9H).  $^{13}\text{C}$  NMR (100 MHz,  $\text{CDCl}_3$ )  $\delta$  188.19, 187.59, 187.12, 186.39, 167.40, 167.37, 160.18, 156.41, 156.04, 149.29, 146.29, 146.19, 145.80, 139.54, 138.70, 138.46, 136.81, 134.63, 134.46, 134.25, 133.95, 133.89, 133.41, 133.32, 132.00, 131.93, 131.77, 131.56, 131.05, 130.96, 130.84, 130.63, 130.45, 129.47, 126.34, 126.25, 123.31, 121.51, 119.20, 116.36, 113.55, 113.51, 102.69, 102.65, 64.18, 52.61, 35.64, 35.30, 29.29, 29.26, 20.48. HRMS (ESI): calc. for  $[(\text{C}_{29}\text{H}_{27}\text{NO}_5)]$  (M+H) 470.1967, measured 470.1988.

**Methyl (E)-2-((2-cyanophenoxy)methyl)-3-(3-(1-methyl-2,5-dioxo-2,5-dihydro-1H-pyrrol-3-yl)phenyl)acrylate (12a)**

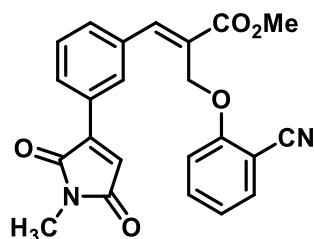

Pale yellow solid, Yield (62%), M.P (132 °C),  $^1\text{H}$  NMR (400 MHz,  $\text{CDCl}_3$ )  $\delta$  8.09 (s, 1H), 8.02 (s, 1H), 7.92 (d,  $J = 7.8$  Hz, 1H), 7.64 – 7.48 (m, 4H), 7.11 (d,  $J = 8.4$  Hz, 1H), 7.07 – 7.03 (m, 1H), 6.62 (s, 1H), 4.98 (s, 2H), 3.87 (s, 3H), 3.03 (s, 3H).  $^{13}\text{C}$  NMR (100 MHz,  $\text{CDCl}_3$ )  $\delta$  170.55, 170.17, 167.13, 160.15, 145.53, 143.27, 134.99, 134.46, 134.00, 132.18, 129.80, 129.67, 129.60, 129.42, 127.48, 124.91, 121.60, 116.41, 113.42, 102.78, 63.84, 52.70, 23.98. HRMS (ESI): calc. for  $[(\text{C}_{23}\text{H}_{18}\text{N}_2\text{O}_5)]$  (M+H) 403.1294, measured 403.1281.

**Methyl (E)-2-((2-cyanophenoxy)methyl)-3-(3-(1-ethyl-2,5-dioxo-2,5-dihydro-1H-pyrrol-3-yl)phenyl)acrylate (12b)**

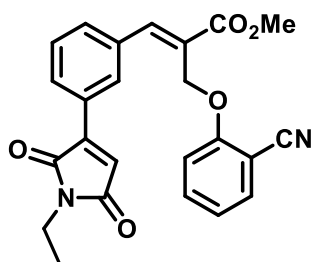

Pale yellow solid, Yield (60%), M.P (134 °C),  $^1\text{H}$  NMR (400 MHz,  $\text{CDCl}_3$ )  $\delta$  8.09 (s, 1H), 8.03 (s, 1H), 7.91 (d,  $J = 7.7$  Hz, 1H), 7.62-48 (m, 4H), 7.15 – 7.00 (m, 2H), 6.60 (s, 1H), 4.98 (s, 2H), 3.87 (s, 3H), 3.57 (q,  $J = 6.9$  Hz, 2H), 1.18 (t,  $J = 7.0$  Hz, 3H).  $^{13}\text{C}$  NMR (100 MHz,  $\text{CDCl}_3$ )  $\delta$  170.32, 169.98, 167.11, 160.13, 145.53, 143.02, 134.93, 134.44, 133.96, 132.13, 129.79, 129.68, 129.55, 129.45, 127.40, 124.88, 121.55, 116.39, 113.37, 102.72, 63.78, 52.67, 33.04, 13.97. HRMS (ESI): calc. for  $[(\text{C}_{24}\text{H}_{21}\text{N}_2\text{O}_5)]$  (M+H) 417.1450, measured 417.1457.

**Methyl (E)-2-((2-cyanophenoxy)methyl)-3-(3-(2,5-dioxo-1-phenyl-2,5-dihydro-1H-pyrrol-3-yl)phenyl)acrylate (12c)**

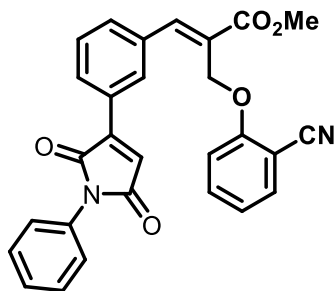

Yellow solid, Yield (64%), M.P (131 °C), <sup>1</sup>H NMR (400 MHz, CDCl<sub>3</sub>) δ 8.12 (d, *J* = 5.3 Hz, 2H), 7.97 (d, *J* = 7.8 Hz, 1H), 7.65 (d, *J* = 7.8 Hz, 1H), 7.56 – 7.44 (m, 5H), 7.39 – 7.32 (m, 3H), 7.13 (d, *J* = 8.4 Hz, 1H), 7.05 – 7.01 (m, 1H), 6.78 (s, 1H), 5.01 (s, 2H), 3.88 (s, 3H). <sup>13</sup>C NMR (100 MHz, CDCl<sub>3</sub>) δ 169.23, 168.89, 167.13, 160.15, 145.45, 143.07, 135.03, 134.45, 133.97, 132.55, 131.50, 129.99, 129.92, 129.67, 129.26, 129.15, 127.97, 127.51, 126.22, 125.04, 121.56, 116.46, 113.40, 102.76, 63.78, 52.71. HRMS (ESI): calc. for [(C<sub>28</sub>H<sub>20</sub>N<sub>2</sub>O<sub>5</sub>)] (M+H) 465.1450, measured 465.1450.

**Methyl (E)-3-(3-(1-benzyl-2,5-dioxo-2,5-dihydro-1H-pyrrol-3-yl)phenyl)-2-((2-cyanophenoxy)methyl)acrylate (12d)**

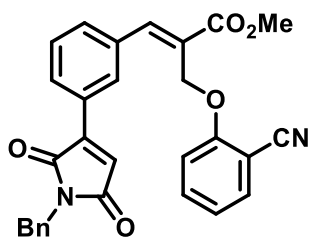

Yellow solid, Yield (67%), M.P (137 °C), <sup>1</sup>H NMR (400 MHz, CDCl<sub>3</sub>) δ 8.09 (s, 1H), 8.04 (s, 1H), 7.90 (d, *J* = 7.9 Hz, 1H), 7.62 – 7.49 (m, 4H), 7.32 – 7.27 (m, 5H), 7.10 (d, *J* = 8.5 Hz, 1H), 7.04 – 7.01 (m, 1H), 6.63 (s, 1H), 4.98 (s, 2H), 4.67 (s, 2H), 3.87 (s, 3H). <sup>13</sup>C NMR (100 MHz, CDCl<sub>3</sub>) δ 170.12, 169.69, 167.08, 160.13, 145.45, 143.03, 136.31, 134.94, 134.40, 133.94, 132.21, 129.77, 129.68, 129.54, 129.32, 128.75, 128.56, 127.92, 127.44, 124.81, 121.52, 116.38, 113.34, 102.68, 63.77, 52.66, 41.67. HRMS (ESI): calc. for [(C<sub>29</sub>H<sub>22</sub>N<sub>2</sub>O<sub>5</sub>)] (M+H) 479.1607, measured 479.1603.

**Methyl (E)-2-((2-cyanophenoxy)methyl)-3-(3-(2,5-dioxo-1-phenethyl-2,5-dihydro-1H-pyrrol-3-yl)phenyl)acrylate (12e)**

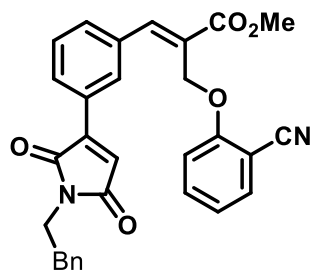

Yellow solid, Yield (70%), M.P (113 °C),  $^1\text{H}$  NMR (400 MHz,  $\text{CDCl}_3$ )  $\delta$  8.11 (s, 1H), 8.03 (s, 1H), 7.89 (d,  $J = 7.9$  Hz, 1H), 7.64 – 7.49 (m, 4H), 7.34 – 7.27 (m, 2H), 7.25 – 7.19 (m, 3H), 7.12 (d,  $J = 8.4$  Hz, 1H), 7.07 – 7.03 (m, 1H), 6.59 (s, 1H), 5.00 (s, 2H), 3.89 (s, 3H), 3.79 – 3.73 (m, 2H), 2.92 – 2.86 (m, 2H).  $^{13}\text{C}$  NMR (100 MHz,  $\text{CDCl}_3$ )  $\delta$  170.28, 169.87, 167.14, 160.19, 145.54, 142.99, 138.04, 134.99, 134.45, 134.01, 132.23, 129.80, 129.72, 129.59, 129.42, 128.93, 128.69, 127.46, 126.78, 124.81, 121.59, 116.42, 113.40, 102.80, 63.82, 52.71, 39.42, 34.64. HRMS (ESI): calc. for  $[(\text{C}_{30}\text{H}_{24}\text{N}_2\text{O}_5)]$  (M+H) 493.1763, measured 493.1753.

**Methyl (E)-2-((2-cyanophenoxy)methyl)-3-(3-(1-(3,4-dimethoxyphenethyl)-2,5-dioxo-2,5-dihydro-1H-pyrrol-3-yl)phenyl)acrylate (12f)**

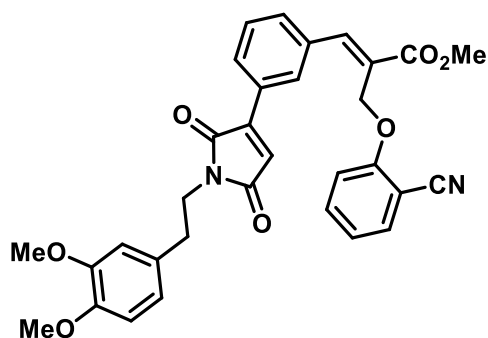

Yellow solid, Yield (54%), M.P (114 °C),  $^1\text{H}$  NMR (400 MHz,  $\text{CDCl}_3$ )  $\delta$  8.10 (s, 1H), 8.03 (s, 1H), 7.90 (d,  $J = 7.9$  Hz, 1H), 7.64 – 7.49 (m, 4H), 7.13 (d,  $J = 8.4$  Hz, 1H), 7.06 (dd,  $J = 7.6$ , 0.8 Hz, 1H), 6.77 (dd,  $J = 14.7$ , 5.1 Hz, 2H), 6.73 (s, 1H), 6.59 (s, 1H). 5.00 (s, 2H), 3.89 (s, 3H), 3.86 (s, 3H), 3.85 (s, 3H), 3.76 (t,  $J = 4$  Hz, 2H), 2.85 (t,  $J = 8$  Hz, 2H).  $^{13}\text{C}$  NMR (100 MHz,  $\text{CDCl}_3$ )  $\delta$  170.35, 169.93, 167.14, 160.22, 149.09, 147.93, 145.52, 143.04, 135.05, 134.44, 134.01, 132.23, 130.56, 129.80, 129.72, 129.62, 129.44, 127.56, 124.84, 121.62, 120.99, 116.41, 113.50, 112.14, 111.48, 102.89, 63.89, 56.03, 52.70, 39.50, 34.18. HRMS (ESI): calc. for  $[(\text{C}_{32}\text{H}_{28}\text{N}_2\text{O}_7)]$  (M+H) 553.1975, measured 553.1892.

**Methyl (E)-2-((2-cyanophenoxy)methyl)-3-(3-(2,5-dioxo-1-(o-tolyl)-2,5-dihydro-1H-pyrrol-3-yl)phenyl)acrylate (12g)**

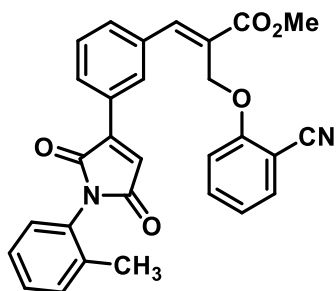

Yellow gummy liquid, Yield (67%),  $^1\text{H}$  NMR (400 MHz,  $\text{CDCl}_3$ )  $\delta$  8.13 (s, 1H), 8.11 (s, 1H), 7.99 (d,  $J = 7.9$  Hz, 1H), 7.65 (d,  $J = 7.8$  Hz, 1H), 7.56 – 7.52 (m, 4H), 7.33 (d,  $J = 1.4$  Hz, 2H), 7.13 – 7.11 (m, 2H), 7.02 (t,  $J = 7.6$  Hz, 1H), 6.80 (s, 1H), 5.02 (s, 2H), 3.88 (s, 3H), 2.16 (s, 3H).  $^{13}\text{C}$  NMR (100 MHz,  $\text{CDCl}_3$ )  $\delta$  167.95, 167.59, 165.73, 158.73, 144.02, 141.91, 135.28, 133.65, 133.02, 132.55, 131.09, 129.80, 128.95, 128.58, 128.49, 128.26, 128.06, 127.94, 127.43, 126.16, 125.51, 123.72, 120.19, 115.01, 112.05, 101.38, 62.41, 51.29, 16.68. HRMS (ESI): calc. for  $[(\text{C}_{29}\text{H}_{22}\text{N}_2\text{O}_5)]$  (M+H) 479.1607, measured 479.1557.

**Methyl (E)-2-((2-cyanophenoxy)methyl)-3-(3-(1-(2,4-dimethylphenyl)-2,5-dioxo-2,5-dihydro-1H-pyrrol-3-yl)phenyl)acrylate (12h)**

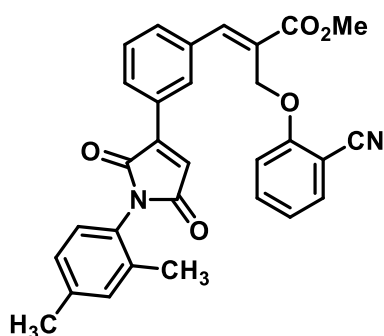

Yellow solid, Yield (75%), M.P ( 131 °C),  $^1\text{H}$  NMR (400 MHz,  $\text{CDCl}_3$ )  $\delta$  8.11 (s, 2H), 7.99 (d,  $J = 7.8$  Hz, 1H), 7.66 – 7.64 (m, 1H), 7.56 – 7.49 (m, 3H), 7.14 – 7.00 (m, 5H), 6.79 (s, 1H), 5.01 (s, 2H), 3.88 (s, 3H), 2.36 (s, 3H), 2.12 (s, 3H).  $^{13}\text{C}$  NMR (100 MHz,  $\text{CDCl}_3$ )  $\delta$  169.53, 169.18, 167.13, 162.85, 145.43, 143.90, 139.48, 136.30, 135.05, 134.43, 133.98, 132.42, 131.94, 130.00, 129.88, 129.66, 129.42, 128.57, 127.67, 127.65, 127.59, 125.12, 121.61, 118.53, 113.49, 102.82, 63.85, 52.69, 21.27, 17.98. HRMS (ESI): calc. for  $[(\text{C}_{30}\text{H}_{24}\text{N}_2\text{O}_5)]$  (M+H) 493.1763, measured 493.1753.

**Methyl (E)-3-(3-(1-(4-chlorophenyl)-2,5-dioxo-2,5-dihydro-1H-pyrrol-3-yl)phenyl)-2-((2-cyanophenoxy)methyl)acrylate (12i)**

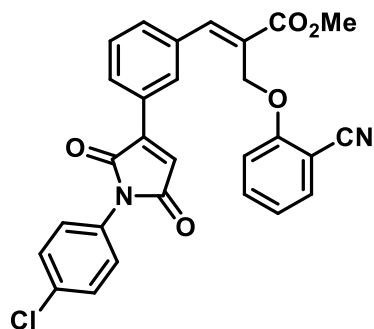

Yellow solid, Yield (68%), M.P (164 °C),  $^1\text{H}$  NMR (400 MHz,  $\text{CDCl}_3$ )  $\delta$  8.15 (s, 1H), 8.12 (s, 1H), 7.95 (d,  $J = 7.9$  Hz, 1H), 7.66 (d,  $J = 7.7$  Hz, 1H), 7.57 – 7.51 (m, 3H), 7.43 (d,  $J = 8.8$  Hz, 2H), 7.30 (d,  $J = 8.8$  Hz, 2H), 7.14 (d,  $J = 8.4$  Hz, 1H), 7.06 – 7.02 (m, 1H), 6.79 (s, 1H), 5.02 (s, 2H), 3.89 (s, 3H).  $^{13}\text{C}$  NMR (100 MHz,  $\text{CDCl}_3$ )  $\delta$  168.97, 168.58, 167.14, 160.19, 145.45, 143.29, 135.11, 134.48, 133.99, 133.63, 132.75, 130.08, 130.00, 129.94, 129.72, 129.35, 129.13, 127.58, 127.29, 125.07, 121.59, 116.48, 113.45, 102.80, 63.79, 52.76. HRMS (ESI): calc. for  $[(\text{C}_{28}\text{H}_{19}\text{ClN}_2\text{O}_5)]$  (M+H) 499.1061, measured 499.1032.

**Methyl (E)-2-((2-cyanophenoxy)methyl)-3-(3-(1-(naphthalen-1-yl)-2,5-dioxo-2,5-dihydro-1H-pyrrol-3-yl)phenyl)acrylate (12j)**

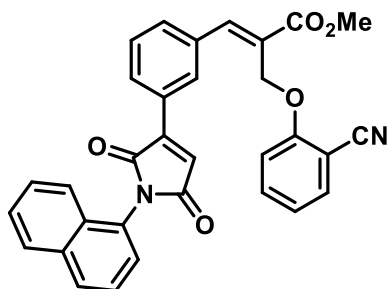

Yellow liquid, Yield (72%),  $^1\text{H}$  NMR (400 MHz,  $\text{CDCl}_3$ )  $\delta$  8.18 (s, 1H), 8.12 (s, 1H), 8.02 (d,  $J = 7.9$  Hz, 1H), 7.97 – 7.92 (m, 2H), 7.67 (d,  $J = 7.8$  Hz, 1H), 7.58 – 7.53 (m, 5H), 7.46 (d,  $J = 8$  Hz, 2H), 7.38 (dd,  $J = 7.3, 1.0$  Hz, 1H), 7.12 (s, 1H), 6.95 (t,  $J = 7.6$  Hz, 1H), 6.90 (s, 1H), 5.02 (s, 2H), 3.88 (s, 3H).  $^{13}\text{C}$  NMR (100 MHz,  $\text{CDCl}_3$ )  $\delta$  169.81, 169.43, 167.17, 160.14, 145.44, 143.47, 135.08, 134.54, 134.41, 133.92, 132.63, 130.50, 130.08, 130.00, 129.98, 129.70, 129.34, 128.66, 127.96, 127.57, 127.10, 126.66, 125.46, 125.20, 122.52, 121.55, 116.12, 113.43, 102.72, 63.80, 52.71. HRMS (ESI): calc. for  $[(\text{C}_{32}\text{H}_{22}\text{N}_2\text{O}_5)]$  (M+H) 515.1607, measured 515.15583.

**Ethyl (E)-2-((2-cyanophenoxy)methyl)-3-(3-(1-methyl-2,5-dioxo-2,5-dihydro-1H-pyrrol-3-yl)phenyl)acrylate (12k)**

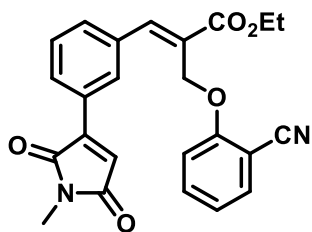

Light yellow solid, Yield (59%), M.P (138 °C),  $^1\text{H}$  NMR (400 MHz,  $\text{CDCl}_3$ )  $\delta$  8.09 (s, 1H), 8.03 (s, 1H), 7.92 (d,  $J = 7.9$  Hz, 1H), 7.63 (d,  $J = 7.8$  Hz, 1H), 7.59 – 7.48 (m, 3H), 7.12 (d,  $J = 8.5$  Hz, 1H), 7.04 (t,  $J = 7.6$  Hz, 1H), 6.64 (s, 1H), 4.99 (s, 2H), 4.33 (q,  $J = 7.1$  Hz, 2H), 3.03 (s, 3H), 1.36 (t,  $J = 7.1$  Hz, 3H).  $^{13}\text{C}$  NMR (100 MHz,  $\text{CDCl}_3$ )  $\delta$  170.58, 170.20, 166.65, 160.21, 145.16, 143.30, 135.08, 134.44, 133.98, 132.18, 129.72, 129.67, 129.58, 129.39, 127.82, 124.90, 121.56, 116.43, 113.46, 102.76, 63.86, 61.72, 23.99, 14.37. HRMS (ESI): calc. for  $[(\text{C}_{24}\text{H}_{20}\text{N}_2\text{O}_5)]$  (M+H) 417.1450, measured 417.1441.

**Methyl (E)-2-((2-cyanophenoxy)methyl)-3-(2-methoxy-5-(1-methyl-2,5-dioxo-2,5-dihydro-1H-pyrrol-3-yl)phenyl)acrylate (12l)**

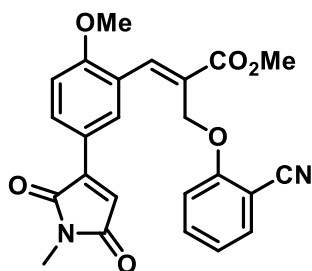

Yellow solid, Yield (78%), M.P ( 176 °C),  $^1\text{H}$  NMR (400 MHz,  $\text{CDCl}_3$ )  $\delta$  8.14 (s, 1H), 8.00 (dd,  $J = 8.7, 2.2$  Hz, 1H), 7.88 (d,  $J = 1.6$  Hz, 1H), 7.51 (dd,  $J = 7.6, 1.6$  Hz, 1H), 7.50 – 7.40 (m, 1H), 7.00 – 6.91 (m, 3H), 6.26 (s, 1H), 4.90 (s, 2H), 3.86 (s, 3H), 3.81 (s, 3H), 2.91 (s, 3H).  $^{13}\text{C}$  NMR (100 MHz,  $\text{CDCl}_3$ )  $\delta$  170.92, 170.48, 167.13, 160.13, 159.97, 142.92, 141.25, 134.40, 134.05, 132.28, 130.76, 127.25, 124.19, 122.15, 121.63, 121.44, 116.46, 113.06, 111.02, 102.61, 64.16, 56.04, 52.61, 23.85. HRMS (ESI): calc. for  $[(\text{C}_{24}\text{H}_{20}\text{N}_2\text{O}_6)]$  (M+H) 433.1400, measured 433.1386.

**Methyl (E)-3-(5-(1-benzyl-2,5-dioxo-2,5-dihydro-1H-pyrrol-3-yl)-2-bromophenyl)-2-((2-cyanophenoxy)methyl)acrylate (12m)**

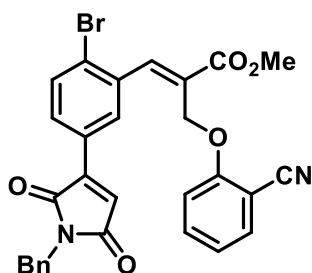

Off white solid, Yield (52%), M.P (175 °C), <sup>1</sup>H NMR (400 MHz, CDCl<sub>3</sub>) δ 8.08 (s, 1H), 8.01 (s, 1H), 7.80 (dd, *J* = 8.4, 1.6 Hz, 1H), 7.70 (d, *J* = 8.4 Hz, 1H), 7.57 – 7.44 (m, 2H), 7.31 – 7.27 (m, 5H), 6.99 (t, *J* = 8.8 Hz, 2H), 6.60 (s, 1H), 4.91 (s, 2H), 4.63 (s, 2H), 3.90 (s, 3H). <sup>13</sup>C NMR (100 MHz, CDCl<sub>3</sub>) δ 169.89, 169.48, 166.55, 159.97, 144.06, 142.17, 136.27, 135.57, 134.40, 133.99, 133.63, 130.69, 130.62, 128.97, 128.81, 128.69, 128.40, 128.01, 127.33, 125.18, 121.55, 116.40, 113.06, 102.62, 63.84, 52.87, 41.78. HRMS (ESI): calc. for [(C<sub>24</sub>H<sub>20</sub>N<sub>2</sub>O<sub>6</sub>)] (M+H) 433.1400, measured 433.1386.

**Methyl (*E*)-2-((2-cyanophenoxy)methyl)-3-(4-methyl-3-(1-methyl-2,5-dioxo-2,5-dihydro-1H-pyrrol-3-yl)phenyl)acrylate (12n)**

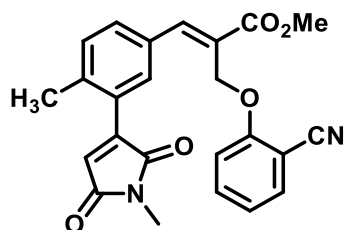

White solid, Yield (68%), M.P (140 °C), <sup>1</sup>H NMR (400 MHz, CDCl<sub>3</sub>) δ 8.06 (s, 1H), 7.67 (d, *J* = 1.3 Hz, 1H), 7.55 – 7.49 (m, 3H), 7.34 (d, *J* = 8.0 Hz, 1H), 7.17 (d, *J* = 9.0 Hz, 1H), 7.03 (t, *J* = 7.6 Hz, 1H), 6.55 (s, 1H), 5.02 (s, 2H), 3.87 (s, 3H), 3.01 (s, 3H), 2.38 (s, 3H). <sup>13</sup>C NMR (100 MHz, CDCl<sub>3</sub>) δ 170.64, 170.44, 167.39, 160.31, 145.78, 144.68, 139.44, 134.43, 133.82, 132.09, 131.68, 131.62, 131.56, 128.80, 128.74, 126.57, 121.42, 116.45, 113.73, 102.75, 64.01, 52.63, 24.12, 20.94. HRMS (ESI): calc. for [(C<sub>24</sub>H<sub>20</sub>N<sub>2</sub>O<sub>5</sub>)] (M+H) 417.1450, measured 417.1406.

**Methyl (*E*)-2-((2-cyanophenoxy)methyl)-3-(4-isopropyl-3-(1-methyl-2,5-dioxo-2,5-dihydro-1H-pyrrol-3-yl)phenyl)acrylate (12o)**

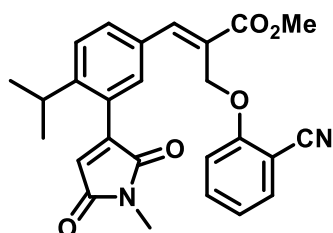

Yellow liquid, Yield (51%), <sup>1</sup>H NMR (400 MHz, CDCl<sub>3</sub>) δ 8.06 (s, 1H), 7.58 – 7.45 (m, 5H), 7.18 (dd, *J* = 9.1, 0.8 Hz, 1H), 7.05 – 7.01 (m, 1H), 6.50 (s, 1H), 5.01 (s, 2H), 3.87 (s, 3H), 3.02 (s, 3H), 2.97 (dt, *J* = 13.8, 6.9 Hz, 1H), 1.23 (d, *J* = 6.8 Hz, 6H). <sup>13</sup>C NMR (100 MHz, CDCl<sub>3</sub>) δ 170.83, 170.35, 167.39, 160.28, 150.16, 145.86, 145.72, 134.44, 133.85, 131.87, 131.85, 131.30, 129.04, 127.85, 126.82, 126.55, 121.44, 116.42, 113.73, 102.75, 64.07,



52.63, 30.69, 24.21, 24.14. HRMS (ESI): calc. for [(C<sub>26</sub>H<sub>24</sub>N<sub>2</sub>O<sub>5</sub>)] (M+H) 445.1763, measured 445.1693.

**Methyl (*E*)-2-((2-cyanophenoxy)methyl)-3-(4-fluoro-3-(1-methyl-2,5-dioxo-2,5-dihydro-1H-pyrrol-3-yl)phenyl)acrylate (12p)**

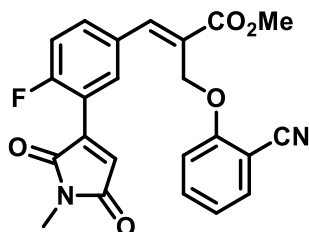

Pale yellow solid, Yield (49%), M.P (154 °C), <sup>1</sup>H NMR (400 MHz, CDCl<sub>3</sub>) δ 8.47 (d, *J* = 6.6 Hz, 2H), 8.05 (s, 1H), 7.61 – 7.48 (m, 3H), 7.20 (d, *J* = 8.5 Hz, 1H), 7.03 – 6.99 (m, 1H), 6.98 (d, *J* = 2.8 Hz, 2H), 5.15 (s, 2H), 3.89 (s, 3H), 3.02 (s, 3H). <sup>13</sup>C NMR (100 MHz, CDCl<sub>3</sub>) δ 170.06, 170.03, 167.02, 160.18, 143.44, 136.28, 134.73, 134.70, 134.37, 133.66, 131.00, 130.96, 129.94, 129.82, 128.03, 121.38, 118.51, 118.38, 116.47, 113.56, 102.78, 63.31, 52.84, 24.12. HRMS (ESI): calc. for [(C<sub>23</sub>H<sub>18</sub>FN<sub>2</sub>O<sub>5</sub>)] (M+Na) 443.1019, measured 443.1000.

**Methyl (*E*)-3-(4-chloro-3-(1-methyl-2,5-dioxo-2,5-dihydro-1H-pyrrol-3-yl)phenyl)-2-((2-cyanophenoxy)methyl)acrylate (12q)**

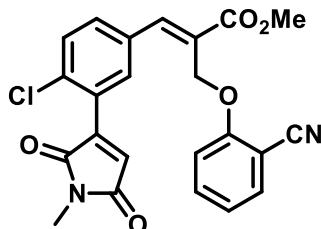

Yellow solid, Yield (54%), M.P (119 °C), <sup>1</sup>H NMR (400 MHz, CDCl<sub>3</sub>) δ 8.03 (s, 1H), 7.90 – 7.87 (m, 1H), 7.58 – 7.52 (m, 4H), 7.21 – 7.18 (m, 1H), 7.06 – 7.02 (m, 1H), 6.96 (s, 1H), 5.03 (s, 2H), 3.88 (s, 3H), 3.01 (s, 3H). <sup>13</sup>C NMR (100 MHz, CDCl<sub>3</sub>) δ 170.22, 170.17, 133.03, 127.70, 167.07, 160.21, 144.43, 141.06, 135.58, 134.48, 133.78, 132.93, 132.34, 131.17, 130.39, 127.82, 121.59, 116.42, 113.79, 102.80, 63.76, 52.79, 24.18. HRMS (ESI): calc. for [(C<sub>23</sub>H<sub>17</sub>ClN<sub>2</sub>O<sub>5</sub>)] (M+H) 437.0904, measured 437.0893.

**Methyl (*E*)-2-((2-cyanophenoxy)methyl)-3-(3-(1,1-dioxido-2,3-dihydrothiophen-3-yl)phenyl)acrylate (13a)**

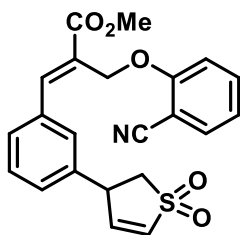

Yellow liquid; Yield (77%),  $^1\text{H}$  NMR (400 MHz,  $\text{CDCl}_3$ )  $\delta$  8.05 (s, 1H), 7.60 – 7.52 (m, 2H), 7.46 – 7.40 (m, 2H), 7.30 – 7.27 (m, 1H), 7.16 (d,  $J = 8.5$  Hz, 1H), 7.06 (td,  $J = 7.6, 0.8$  Hz, 1H), 6.71 (dd,  $J = 6.6, 3.0$  Hz, 1H), 6.63 (dd,  $J = 6.6, 2.3$  Hz, 1H), 4.98 (s, 2H), 4.63 – 4.29 (m, 1H), 3.87 (s, 3H), 3.66 (dd,  $J = 13.9, 8.9$  Hz, 1H), 3.10 (dd,  $J = 13.9, 4.4$  Hz, 1H).  $^{13}\text{C}$  NMR (100 MHz,  $\text{CDCl}_3$ )  $\delta$  167.22, 160.17, 145.87, 141.48, 139.90, 135.34, 134.62, 133.92, 132.13, 130.01, 129.89, 128.75, 128.56, 127.05, 121.65, 116.50, 113.65, 102.60, 63.89, 55.74, 52.69, 44.67. HRMS (ESI): calc. for  $[(\text{C}_{22}\text{H}_{19}\text{NO}_5\text{S})]$  (M+H) 410.1062, measured 410.1063.

**Ethyl** (*E*)-2-((2-cyanophenoxy)methyl)-3-(3-(1,1-dioxido-2,3-dihydrothiophen-3-yl)phenyl)acrylate (13b)

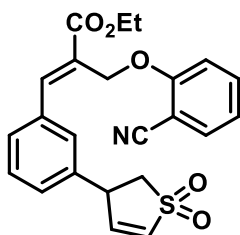

White solid, Yield (74%), M.P (151 °C),  $^1\text{H}$  NMR (400 MHz,  $\text{CDCl}_3$ )  $\delta$  8.05 (s, 1H), 7.59 – 7.51 (m, 3H), 7.48 – 7.41 (m, 2H), 7.31 – 7.27 (m, 1H), 7.18 (d,  $J = 8.4$  Hz, 1H), 7.08 – 7.04 (m, 1H), 6.72 (dd,  $J = 6.6, 3.0$  Hz, 1H), 6.65 (dd,  $J = 6.6, 2.3$  Hz, 1H), 4.99 (s, 2H), 4.44 – 4.37 (m, 1H), 4.33 (q,  $J = 7.1$  Hz, 2H), 3.67 (dd,  $J = 13.9, 8.9$  Hz, 1H), 3.12 (dd,  $J = 13.9, 4.4$  Hz, 1H), 1.36 (t,  $J = 7.1$  Hz, 3H).  $^{13}\text{C}$  NMR (100 MHz,  $\text{CDCl}_3$ )  $\delta$  166.71, 160.22, 145.48, 141.53, 139.86, 135.40, 134.58, 133.88, 132.08, 131.50, 129.96, 129.83, 128.65, 128.53, 127.38, 121.59, 116.50, 113.67, 102.57, 63.91, 61.68, 55.73, 44.66, 14.33. HRMS (ESI): calc. for  $[(\text{C}_{23}\text{H}_{21}\text{NO}_5\text{S})]$  (M+H) 424.1219, measured 424.1220.

**Methyl** (*E*)-2-((2-cyanophenoxy)methyl)-3-(5-(1,1-dioxido-2,3-dihydrothiophen-3-yl)-2-methoxyphenyl)acrylate (13c)

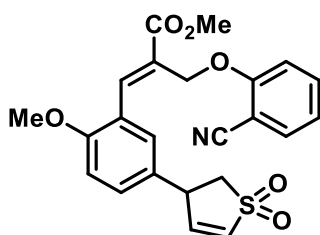

White solid, Yield (81%), M.P (165 °C), <sup>1</sup>H NMR (400 MHz, CDCl<sub>3</sub>) δ 8.20 (s, 1H), 7.56-7.51 (m, 2H), 7.48 (s, 1H), 7.24 (dd, *J* = 8.6, 2.3 Hz, 1H), 7.16 (d, *J* = 8.4 Hz, 1H), 7.04 (t, *J* = 7.6 Hz, 1H), 6.90 (d, *J* = 8.6 Hz, 1H), 6.64 (dd, *J* = 6.6, 3.0 Hz, 1H), 6.54 (dd, *J* = 6.6, 1.2 Hz, 1H), 4.95 (s, 2H), 4.33 (dd, *J* = 4.7, 2.4 Hz, 1H), 3.86 (s, 3H), 3.84 (s, 3H), 3.56 (dd, *J* = 13.8, 8.8 Hz, 1H), 2.98 (dd, *J* = 13.8, 4.2 Hz, 1H). <sup>13</sup>C NMR (100 MHz, CDCl<sub>3</sub>) δ 167.31, 160.30, 157.70, 141.98, 141.89, 134.64, 133.88, 131.78, 131.41, 130.13, 129.82, 126.68, 124.12, 121.59, 116.63, 113.73, 111.59, 102.50, 64.53, 55.92, 52.58, 43.94. HRMS (ESI): calc. for [(C<sub>23</sub>H<sub>21</sub>NO<sub>6</sub>S)] (M+H) 440.1168, measured 440.1138.

**Ethyl (E)-3-(4-chloro-3-(1,1-dioxido-2,3-dihydrothiophen-3-yl)phenyl)-2-((2-cyanophenoxy)methyl)acrylate (13d)**

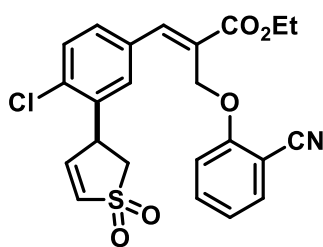

White color solid; Yield (73%), M.P (160 °C), <sup>1</sup>H NMR (400 MHz, CDCl<sub>3</sub>) δ 7.87 (s, 1H), 7.47 (dd, *J* = 12.6, 4.4 Hz, 2H), 7.37 (q, *J* = 8.4 Hz, 2H), 7.29 (s, 1H), 7.05 (s, 1H), 6.97 (t, *J* = 7.6 Hz, 1H), 6.66 (dd, *J* = 6.7, 3.2 Hz, 1H), 6.38 – 6.31 (m, 1H), 4.87 (dd, *J* = 62.5, 10.5 Hz, 2H), 4.73 – 4.65 (m, 1H), 4.22 (q, *J* = 7.1 Hz, 2H), 3.63 (dd, *J* = 13.3, 8.4 Hz, 1H), 2.93 (dd, *J* = 13.8, 4.0 Hz, 1H), 1.25 (t, *J* = 7.1 Hz, 3H). <sup>13</sup>C NMR (100 MHz, CDCl<sub>3</sub>) δ 166.54, 160.12, 143.97, 139.91, 137.38, 135.25, 134.75, 134.07, 133.90, 133.56, 131.31, 130.61, 129.06, 127.74, 121.64, 116.45, 113.59, 102.44, 63.51, 61.83, 54.48, 41.41, 14.38. HRMS (ESI): calc. for [(C<sub>23</sub>H<sub>20</sub>ClNO<sub>5</sub>S)] (M+H) 458.0829, measured 458.0831.

**Methyl (E)-3-(3-acetoxyphenyl)-2-((2-cyanophenoxy)methyl) acrylate (14a)**

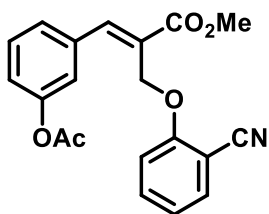

Colourless liquid, Yield (58%), <sup>1</sup>H NMR (400 MHz, CDCl<sub>3</sub>) δ 8.07 (s, 1H), 7.60 – 7.50 (m, 2H), 7.44 – 7.30 (m, 3H), 7.13 – 7.11 (m, 2H), 7.06 – 7.02 (m, 1H), 4.96 (s, 2H), 3.87 (s, 3H), 2.26 (s, 3H). <sup>13</sup>C NMR (100 MHz, CDCl<sub>3</sub>) δ 169.50, 167.23, 160.30, 150.94, 145.72, 135.64, 134.48, 133.86, 129.96, 127.36, 127.17, 123.06, 123.02, 121.52, 116.45, 113.78, 102.85,

64.11, 52.66, 21.18. HRMS (ESI): calc. for [(C<sub>20</sub>H<sub>17</sub>NO<sub>5</sub>)] (M+H) 352.1185, measured 352.1218.

**Ethyl (*E*)-3-(3-acetoxyphenyl)-2-((2-cyanophenoxy)methyl)acrylate (14b)**

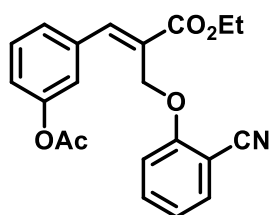

Colourless liquid, Yield (56%), <sup>1</sup>H NMR (400 MHz, CDCl<sub>3</sub>) δ 8.05 (s, 1H), 7.58 – 7.32 (m, 7H), 7.43 – 7.37 (m, 2H), 7.33 (d, *J* = 8.8 Hz, 2H), 7.16 – 7.01 (m, 3H), 4.96 (s, 2H), 4.32 (q, *J* = 7.1 Hz, 2H), 2.25 (s, 3H), 1.35 (t, *J* = 7.1 Hz, 3H). <sup>13</sup>C NMR (100 MHz, CDCl<sub>3</sub>) δ 169.49, 166.76, 160.39, 150.97, 145.33, 135.75, 134.44, 133.85, 131.14, 129.93, 129.77, 128.96, 127.73, 127.16, 123.02, 122.97, 122.20, 121.49, 116.44, 113.86, 102.89, 64.16, 61.65, 21.16, 14.36. HRMS (ESI): calc. for [(C<sub>21</sub>H<sub>19</sub>NO<sub>5</sub>)] (M+H) 366.1341, measured 366.1331.

**Methyl (*E*)-3-(5-acetoxy-2-methoxyphenyl)-2-((2-cyanophenoxy)methyl) acrylate (14c)**

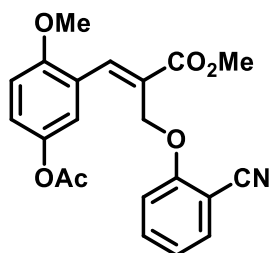

Colourless liquid, Yield (62%), <sup>1</sup>H NMR (400 MHz, CDCl<sub>3</sub>) δ 8.20 (s, 1H), 7.56 – 7.49 (m, 2H), 7.34 (d, *J* = 2.7 Hz, 1H), 7.14 (d, *J* = 8.5 Hz, 1H), 7.09 – 7.00 (m, 2H), 6.88 (d, *J* = 8.9 Hz, 1H), 4.93 (s, 2H), 3.86 (s, 3H), 3.86 (s, 3H), 2.18 (s, 3H). <sup>13</sup>C NMR (100 MHz, CDCl<sub>3</sub>) δ 169.94, 167.31, 160.43, 155.58, 144.00, 141.95, 134.43, 133.70, 131.26, 127.05, 124.10, 122.14, 121.36, 116.50, 115.52, 113.94, 111.09, 105.72, 102.80, 64.60, 56.06, 52.52, 21.01. HRMS (ESI): calc. for [(C<sub>21</sub>H<sub>19</sub>NO<sub>6</sub>)] (M+H) 382.1291, measured 382.1271.

**Methyl (*E*)-3-(5-acetoxy-2-methylphenyl)-2-((2-cyanophenoxy)methyl) acrylate (14d)**

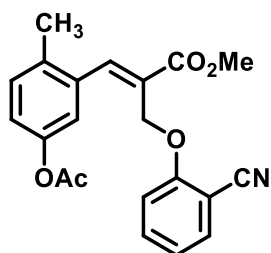

Colorless liquid, Yield (59%), <sup>1</sup>H NMR (400 MHz, CDCl<sub>3</sub>) δ 8.11 (s, 1H), 7.55 (d, *J* = 7.6 Hz, 1H), 7.49 (t, *J* = 8.0 Hz, 1H), 7.22 (d, *J* = 8.8 Hz, 2H), 7.04 – 6.98 (m, 3H), 4.87 (s, 2H),

3.88 (s, 3H), 2.30 (s, 3H), 2.19 (s, 3H).  $^{13}\text{C}$  NMR (100 MHz,  $\text{CDCl}_3$ )  $\delta$  169.72, 167.06, 160.34, 148.75, 144.71, 134.79, 134.50, 134.41, 133.74, 131.21, 128.09, 122.73, 122.63, 121.38, 116.49, 113.71, 102.76, 64.14, 52.64, 21.08, 19.53, HRMS (ESI): calc. for  $[(\text{C}_{21}\text{H}_{19}\text{NO}_6)]$  (M+H) 366.1338, measured 366.1348.

**Methyl (*E*)-3-(3-acetoxy-4-methylphenyl)-2-((2-cyanophenoxy)methyl) acrylate (14e)**

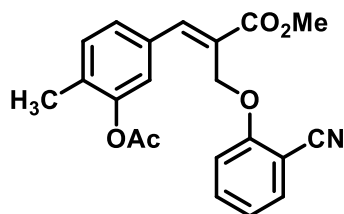

Colourless liquid, Yield (60%),  $^1\text{H}$  NMR (400 MHz,  $\text{CDCl}_3$ )  $\delta$  8.04 (s, 1H), 7.58 – 7.51 (m, 3H), 7.29 – 7.28 (m, 2H), 7.14 (d,  $J$  = 8.5 Hz, 1H), 7.05 – 7.01 (m, 1H), 4.96 (s, 2H), 3.86 (s, 3H), 2.26 (s, 3H), 2.20 (s, 3H).  $^{13}\text{C}$  NMR (100 MHz,  $\text{CDCl}_3$ )  $\delta$  169.25, 167.40, 160.36, 149.58, 145.97, 134.47, 133.83, 133.22, 132.52, 131.63, 127.52, 126.51, 123.46, 121.47, 116.45, 113.89, 102.88, 64.25, 52.56, 20.84, 16.28. HRMS (ESI): calc. for  $[(\text{C}_{21}\text{H}_{19}\text{NO}_5)]$  (M+H) 366.1341, measured 366.1331.

**Methyl (*E*)-3-(3-acetoxy-4-fluorophenyl)-2-((2-cyanophenoxy)methyl) acrylate (14f)**

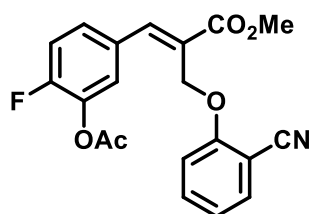

Colourless liquid, Yield (56%),  $^1\text{H}$  NMR (400 MHz,  $\text{CDCl}_3$ )  $\delta$  8.01 (s, 1H), 7.58 – 7.52 (m, 2H), 7.43 – 7.37 (m, 2H), 7.22 – 7.14 (m, 2H), 7.07 – 7.03 (m, 1H), 4.94 (s, 2H), 3.86 (s, 3H), 2.30 (s, 3H).  $^{13}\text{C}$  NMR (100 MHz,  $\text{CDCl}_3$ )  $\delta$  168.41, 167.18, 160.24, 156.32, 153.79, 144.98, 138.49, 138.36, 134.53, 133.87, 131.03, 130.99, 128.92, 128.84, 127.05, 125.57, 121.69, 117.45, 117.26, 116.41, 113.92, 102.94, 64.10, 52.69, 20.58. HRMS (ESI): calc. for  $[(\text{C}_{20}\text{H}_{16}\text{FNO}_5)]$  (M+H) 370.1097, measured 370.1082.

**Methyl (*E*)-2-((2-cyanophenoxy)methyl)-3-(3-cyanophenyl)acrylate (15a)**

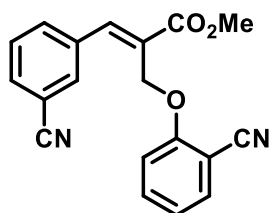

Colourless liquid; Yield (45%),  $^1\text{H}$  NMR (400 MHz,  $\text{CDCl}_3$ )  $\delta$  7.96 (s, 1H), 7.66 (d,  $J$  = 8 Hz, 1H), 7.66 (t,  $J$  = 1.6 Hz, 1H), 7.62-6.59 (m, 1H), 7.53 – 7.45 (m, 3H), 7.04-6.98 (m, 1H), 4.86

(s, 2H), 3.82 (s, 3H).  $^{13}\text{C}$  NMR (100 MHz,  $\text{CDCl}_3$ )  $\delta$  166.73, 160.02, 143.82, 135.55, 134.53, 134.08, 133.73, 133.02, 133.0, 130.00, 128.85, 121.96, 113.66, 113.35, 103.02, 63.86, 52.87. HRMS (ESI): calc. for  $[(\text{C}_{19}\text{H}_{14}\text{N}_2\text{O}_3)]$  (M+H) 319.1083, measured 319.1065.

**Methyl (*E*)-3-(5-cyano-2-methoxyphenyl)-2-((2-cyanophenoxy)methyl)acrylate (15b)**

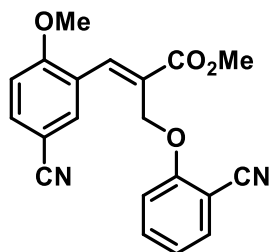

Pale yellow liquid; Yield (51%),  $^1\text{H}$  NMR (400 MHz,  $\text{CDCl}_3$ )  $\delta$  8.06 (s, 1H), 7.68 – 7.65 (m, 2H), 7.58-7.49 (m, 3H), 7.06 – 6.97 (m, 3H), 4.90 (s, 2H), 3.93 (s, 3H), 3.88 (s, 3H).  $^{13}\text{C}$  NMR (100 MHz,  $\text{CDCl}_3$ )  $\delta$  166.71, 160.81, 159.93, 139.72, 135.55, 134.40, 134.08, 133.82, 128.52, 124.79, 121.71, 118.52, 116.19, 113.24, 111.49, 104.44, 102.74, 64.24, 56.21, 52.71. HRMS (ESI): calc. for  $[(\text{C}_{20}\text{H}_{16}\text{N}_2\text{O}_4)]$  (M+H) 349.1188, measured 349.1187.

**Methyl (*E*)-3-(4-cyano-3-methylphenyl)-2-((2-cyanophenoxy)methyl)acrylate (15c)**

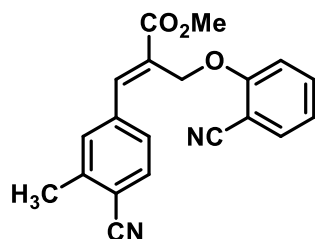

Colourless liquid; Yield (48%),  $^1\text{H}$  NMR (400 MHz,  $\text{CDCl}_3$ )  $\delta$  8.00 (s, 1H), 7.75 – 7.66 (m, 1H), 7.62 – 7.51 (m, 3H), 7.39 (d,  $J = 8.1$  Hz, 1H), 7.12-7.04 (m, 2H), 4.93 (s, 3H), 3.87 (s, 3H), 2.56 (s, 3H).  $^{13}\text{C}$  NMR (100 MHz,  $\text{CDCl}_3$ )  $\delta$  166.92, 161.02, 144.07, 143.63, 134.52, 134.06, 133.68, 133.59, 132.67, 131.12, 128.82, 128.52, 127.89, 121.87, 118.66, 117.47, 116.31, 113.68, 113.66, 102.95, 63.89, 52.79. HRMS (ESI): calc. for  $[(\text{C}_{20}\text{H}_{16}\text{N}_2\text{O}_3)]$  (M+H) 333.1239, measured 333.1253.

**Ethyl (*E*)-3-(3-cyano-4-methylphenyl)-2-((2-cyanophenoxy)methyl)acrylate (15d)**

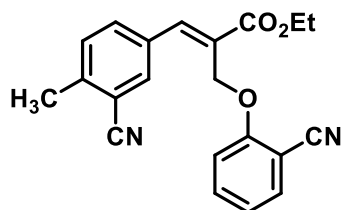

White solid; Yield (49%), M.P. (95 °C)  $^1\text{H}$  NMR (400 MHz,  $\text{CDCl}_3$ )  $\delta$  7.99 (s, 1H), 7.74 (dd,  $J = 8.1, 1.8$  Hz, 1H), 7.69 (d,  $J = 1.6$  Hz, 1H), 7.60 – 7.52 (m, 2H), 7.40 (d,  $J = 8.1$  Hz, 1H),

7.12 (d,  $J = 8.4$  Hz, 1H), 7.09 – 7.03 (m, 1H), 4.94 (s, 2H), 4.33 (q,  $J = 7.1$  Hz, 2H), 2.57 (s, 3H), 1.35 (t,  $J = 7.1$  Hz, 3H).  $^{13}\text{C}$  NMR (100 MHz,  $\text{CDCl}_3$ )  $\delta$  166.44, 160.13, 143.73, 143.56, 134.51, 134.05, 133.69, 133.60, 132.76, 131.11, 128.22, 121.83, 117.51, 113.70, 113.66, 102.96, 63.93, 61.85, 20.58, 14.37. HRMS (ESI): calc. for  $[(\text{C}_{21}\text{H}_{18}\text{N}_2\text{O}_3)]$  (M+H) 347.1396, measured 347.1396.

**Methyl (Z)-2-(bromomethyl)-3-(5-((E)-3-((2-ethylhexyl)oxy)-3-oxoprop-1-en-1-yl)-2-methoxyphenyl)acrylate (16)**

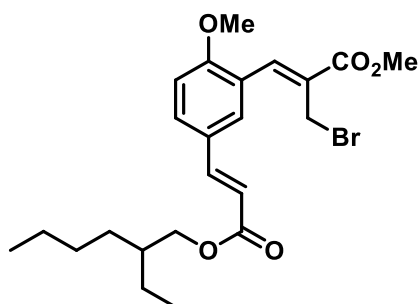

Colourless liquid; Yield (74%),  $^1\text{H}$  NMR (400 MHz,  $\text{CDCl}_3$ )  $\delta$  7.97 (s, 1H), 7.94 (d,  $J = 2.0$  Hz, 1H), 7.66 (d,  $J = 16.0$  Hz, 1H), 7.55 (dd,  $J = 8.6, 2.1$  Hz, 1H), 6.94 (d,  $J = 8.6$  Hz, 1H), 6.42 (d,  $J = 16.0$  Hz, 1H), 4.34 (s, 2H), 4.12 (d,  $J = 5.6$  Hz, 2H), 3.90 (s, 3H), 3.89 (s, 3H), 1.67 – 1.64 (m, 2H), 1.43 – 1.32 (m, 6H), 0.95-0.90 (m, 6H).  $^{13}\text{C}$  NMR (100 MHz,  $\text{CDCl}_3$ )  $\delta$  167.46, 166.59, 159.52, 143.51, 138.28, 131.70, 129.49, 128.95, 127.49, 124.18, 117.34, 111.07, 96.27, 67.19, 55.97, 52.61, 39.02, 30.66, 29.12, 27.06, 24.04, 23.13, 14.20, 11.19. HRMS (ESI): calc. for  $[(\text{C}_{23}\text{H}_{31}\text{BrO}_5)]$  (M+H) 467.1433, measured 467.1460.

**Methyl (E)-3-(5-((E)-3-((2-ethylhexyl)oxy)-3-oxoprop-1-en-1-yl)-2-methoxyphenyl)-2-(piperidin-1-ylmethyl)acrylate (17)**

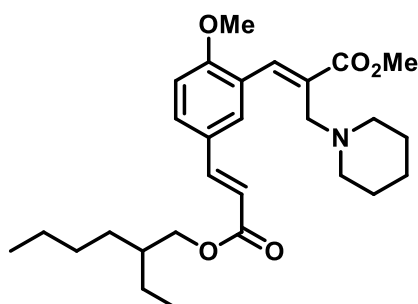

Colourless liquid; Yield (87%),  $^1\text{H}$  NMR (400 MHz,  $\text{CDCl}_3$ )  $\delta$  8.35 (s, 1H), 8.07 (s, 1H), 7.63 (d,  $J = 15.9$  Hz, 1H), 7.48 (dd,  $J = 8.5, 2.1$  Hz, 1H), 6.89 (d,  $J = 8.6$  Hz, 1H), 6.40 (d,  $J = 15.9$  Hz, 1H), 4.26 – 3.99 (m, 2H), 3.88 (s, 3H), 3.8 (s, 3H), 3.39 – 3.35 (m, 2H), 2.49 (s, 4H), 1.68 – 1.57 (m, 5H), 1.47 – 1.25 (m, 9H), 0.91 (t,  $J = 7.3$  Hz, 6H).  $^{13}\text{C}$  NMR (100 MHz,  $\text{CDCl}_3$ )  $\delta$  167.66, 159.31, 144.17, 136.92, 131.72, 127.33, 125.00, 116.67, 110.55, 66.87,

55.90, 53.85, 52.35, 39.04, 30.58, 29.82, 29.12, 25.83, 23.93, 23.12, 14.19, 11.16. HRMS (ESI): calc. for [(C<sub>28</sub>H<sub>41</sub>NO<sub>5</sub>)] (M+H) 458.2906, measured 458.2891.

**Dimethyl 3,3'-(5-(2-((2-cyanophenoxy)methyl)-3-methoxy-3-oxopropyl)-1,3-phenylene) (2E,2'E)-diacrylate (19)**

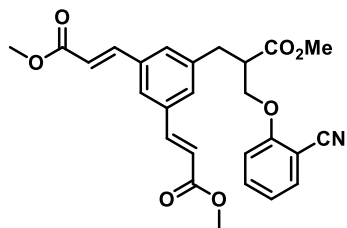

Colorless liquid; Yield (53%), <sup>1</sup>H NMR (400 MHz, CDCl<sub>3</sub>) δ 7.61 (d, *J* = 16.1 Hz, 2H), 7.58 – 7.55 (m, 1H), 7.52 – 7.47 (m, 2H), 7.37 (d, *J* = 1.4 Hz, 2H), 7.03 (td, *J* = 7.6, 0.8 Hz, 1H), 6.91 (d, *J* = 8.3 Hz, 1H), 6.40 (d, *J* = 16.0 Hz, 2H), 4.23 – 4.15 (m, 2H), 3.79 (s, 6H), 3.70 (s, 3H), 3.24 (dd, *J* = 12.7, 5.8 Hz, 1H), 3.19 – 3.10 (m, 2H). <sup>13</sup>C NMR (100 MHz, CDCl<sub>3</sub>) δ 172.72, 167.20, 159.94, 143.76, 139.64, 135.51, 134.51, 133.93, 130.23, 126.35, 121.60, 119.11, 116.18, 112.54, 102.43, 67.84, 52.39, 51.94, 46.52, 33.93, HRMS (ESI): calc. for [(C<sub>26</sub>H<sub>25</sub>NO<sub>7</sub>)] (M+H) 464.1709.1338, measured 464.1711.



## 9. Copies of $^1\text{H}$ and $^{13}\text{C}$ NMR spectra of the products

### Methyl (*E*)-2-((2-cyanophenoxy) methyl)-3-phenylacrylate (3a)

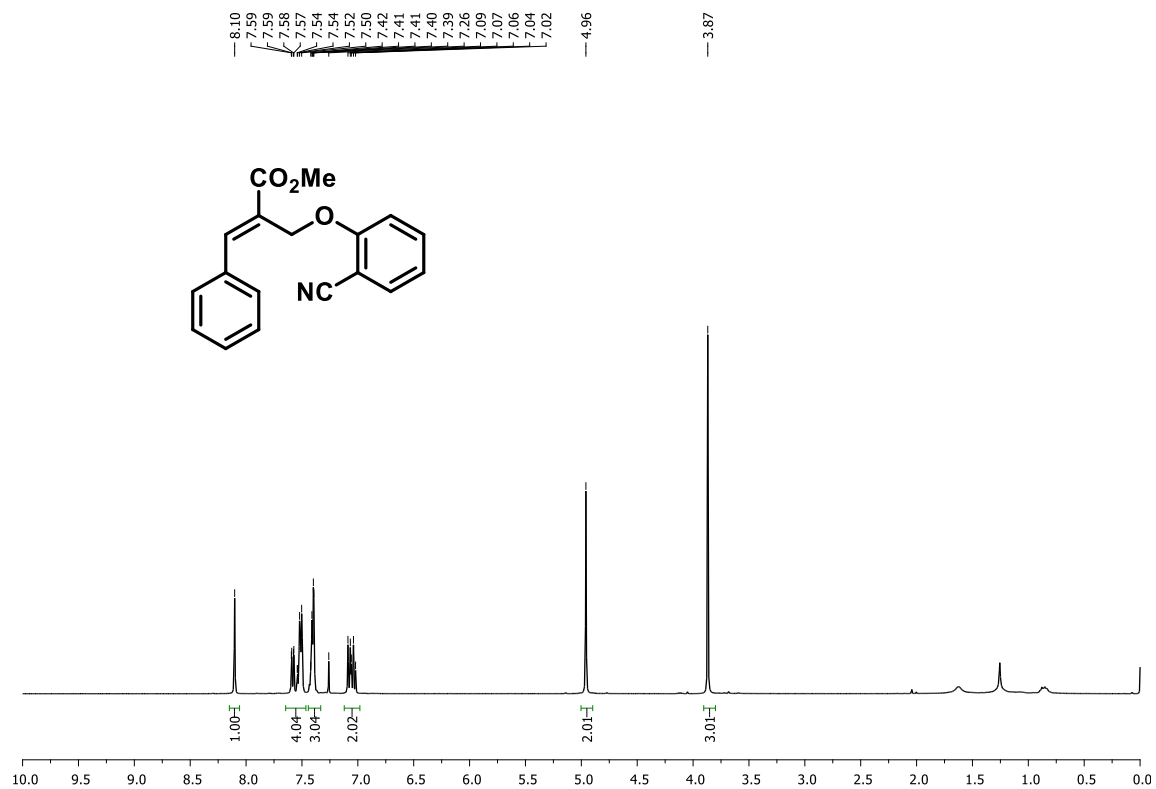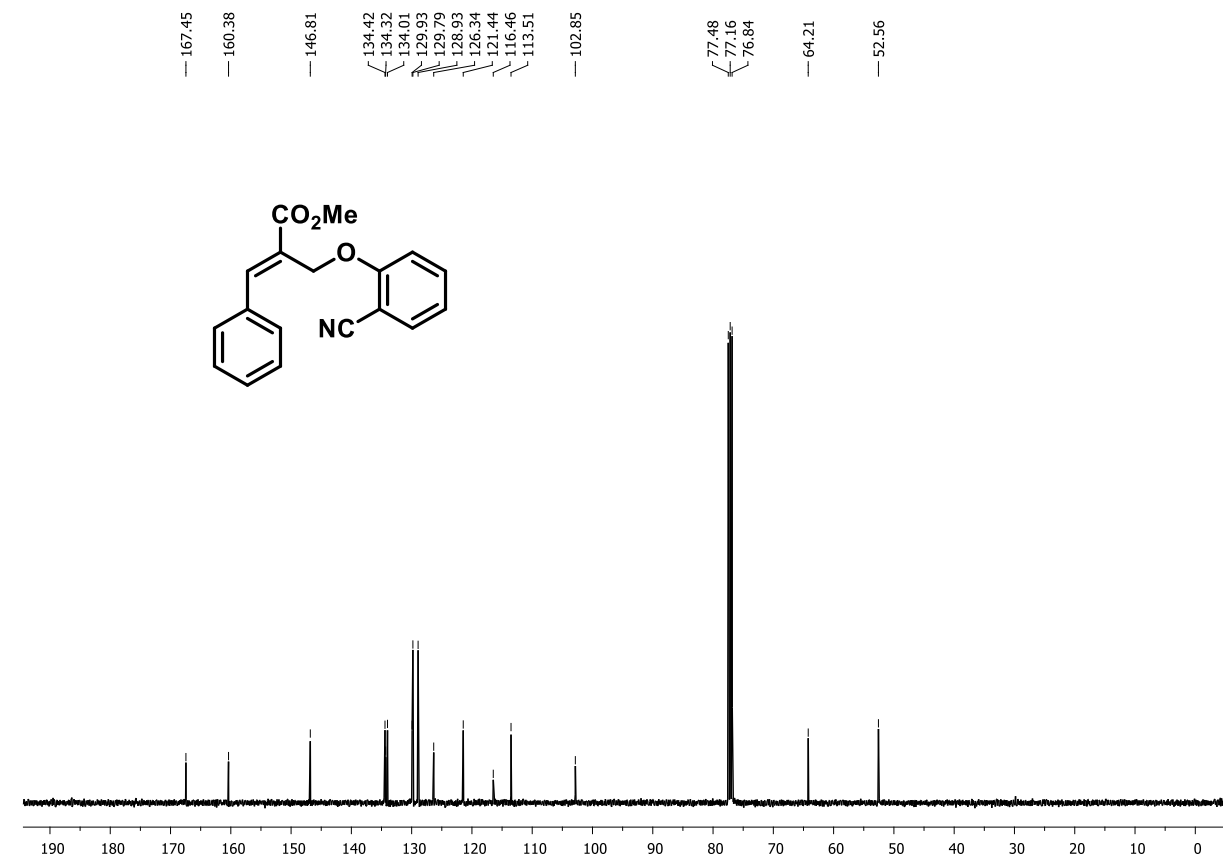

**Ethyl (*E*)-2-((2-cyanophenoxy) methyl)-3-phenylacrylate (1b)**

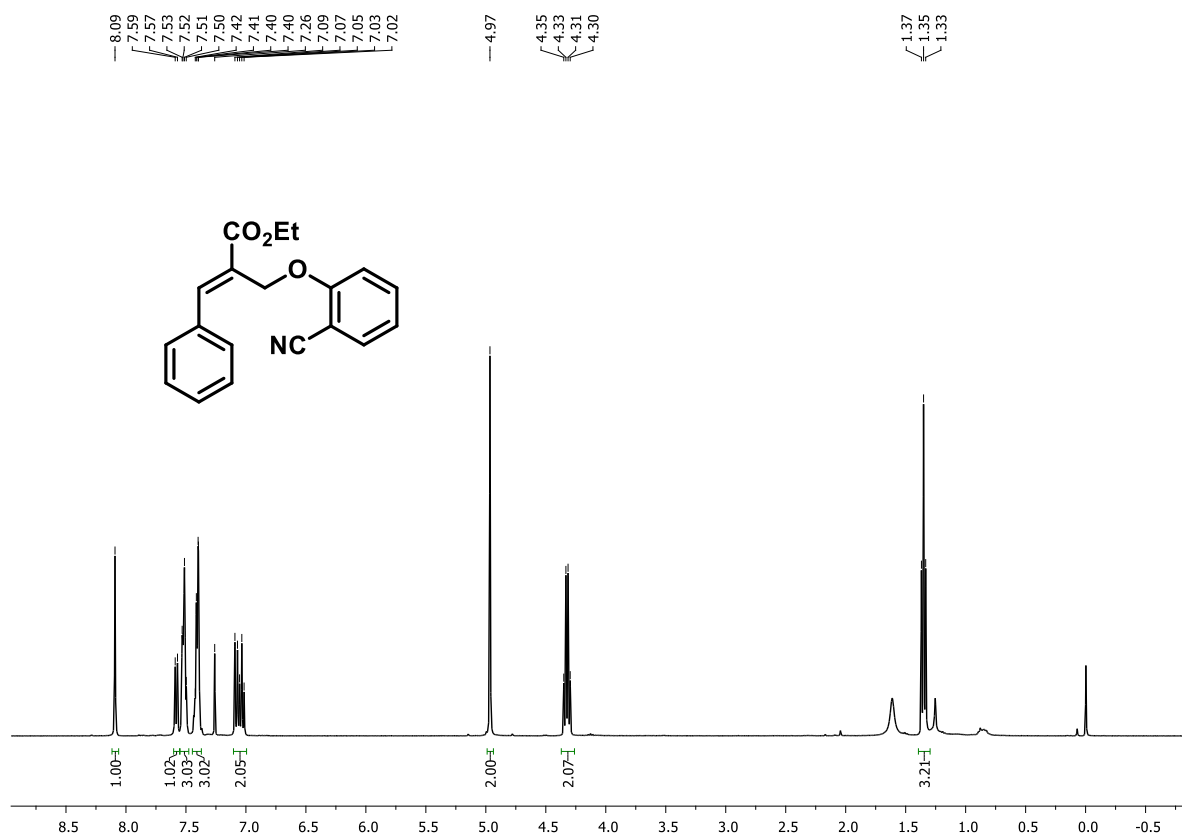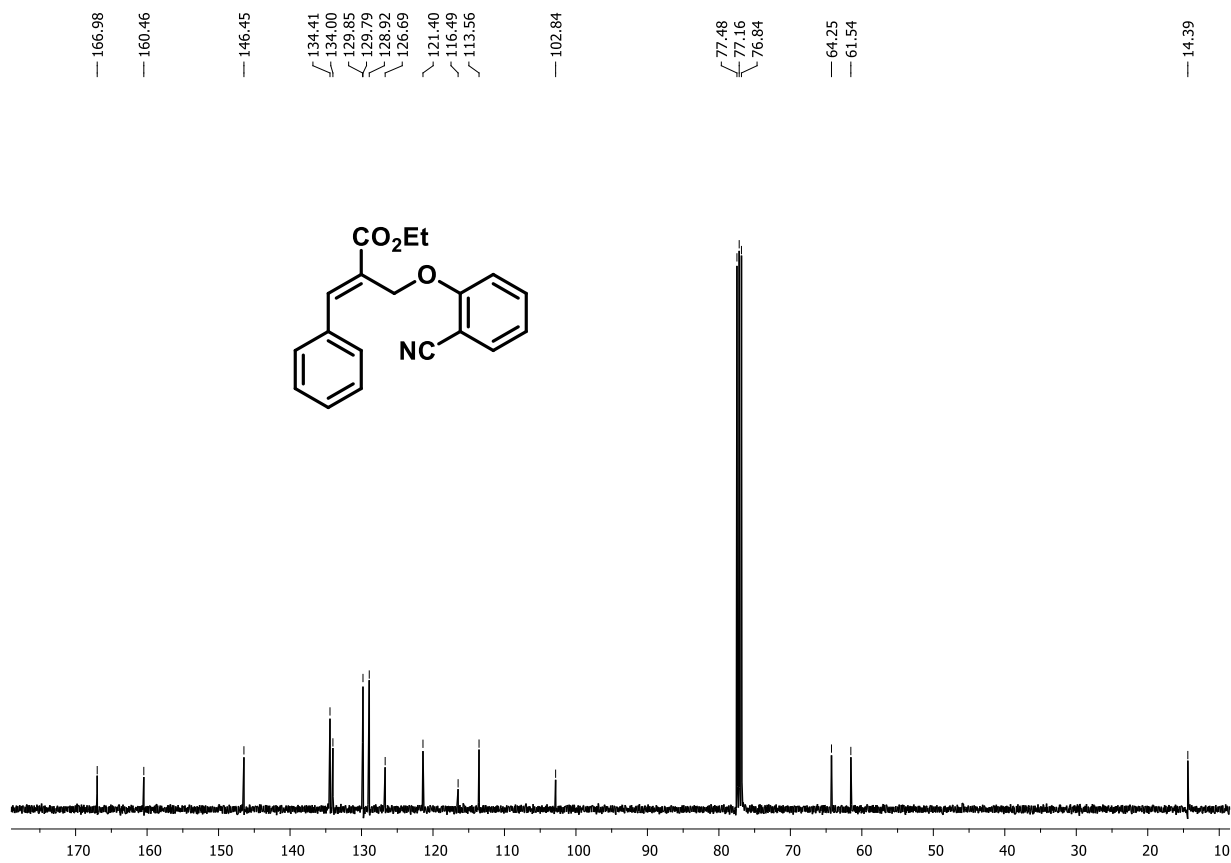

Butyl (*E*)-2-((2-cyanophenoxy) methyl)-3-phenyl acrylate (**1c**)

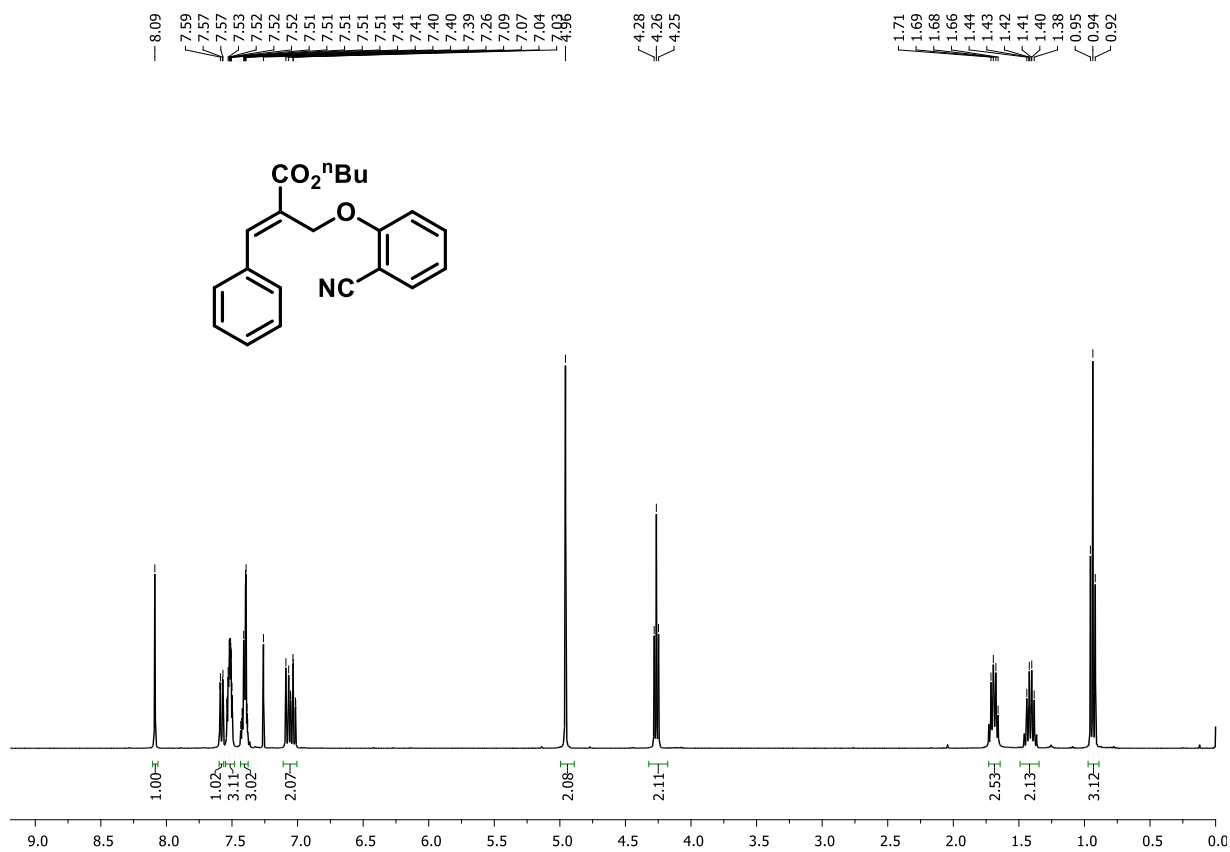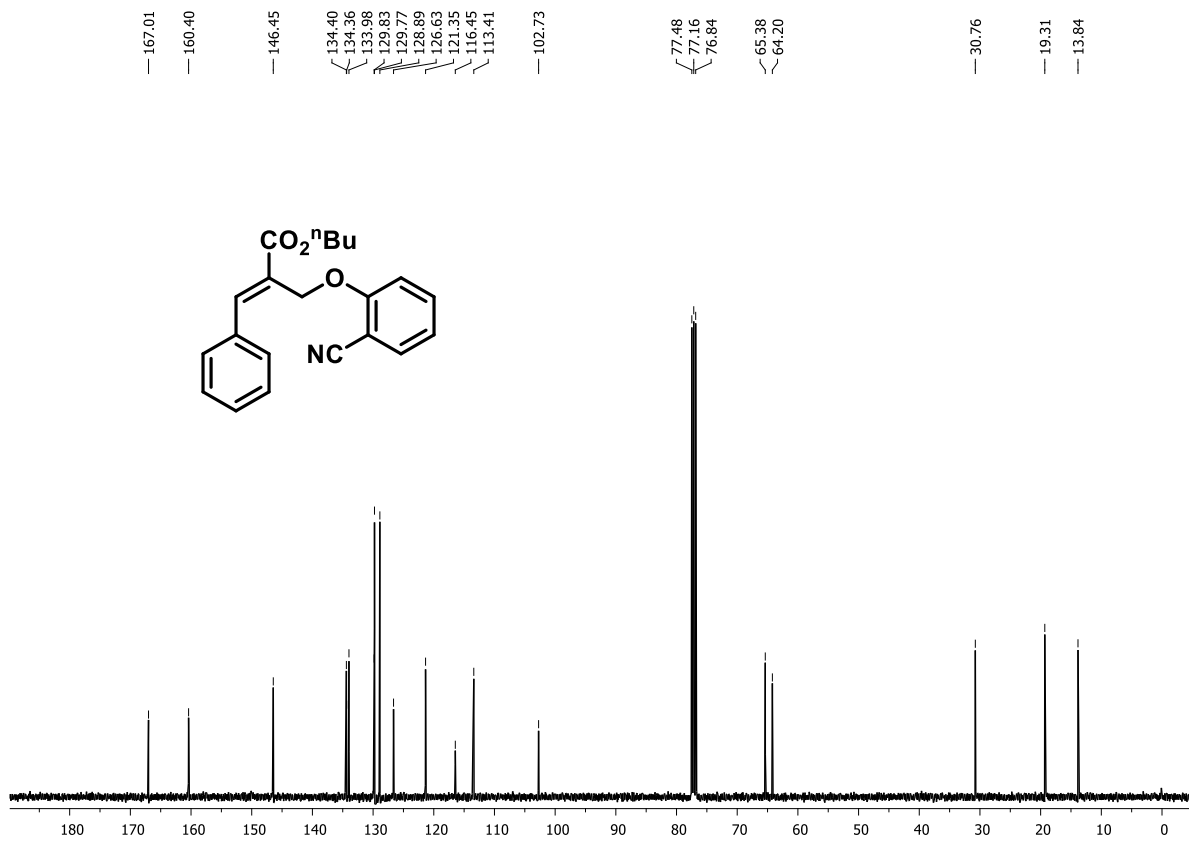

Methyl (*E*)-2-((2-cyanophenoxy) methyl)-3-(*o*-tolyl) acrylate (**1d**)

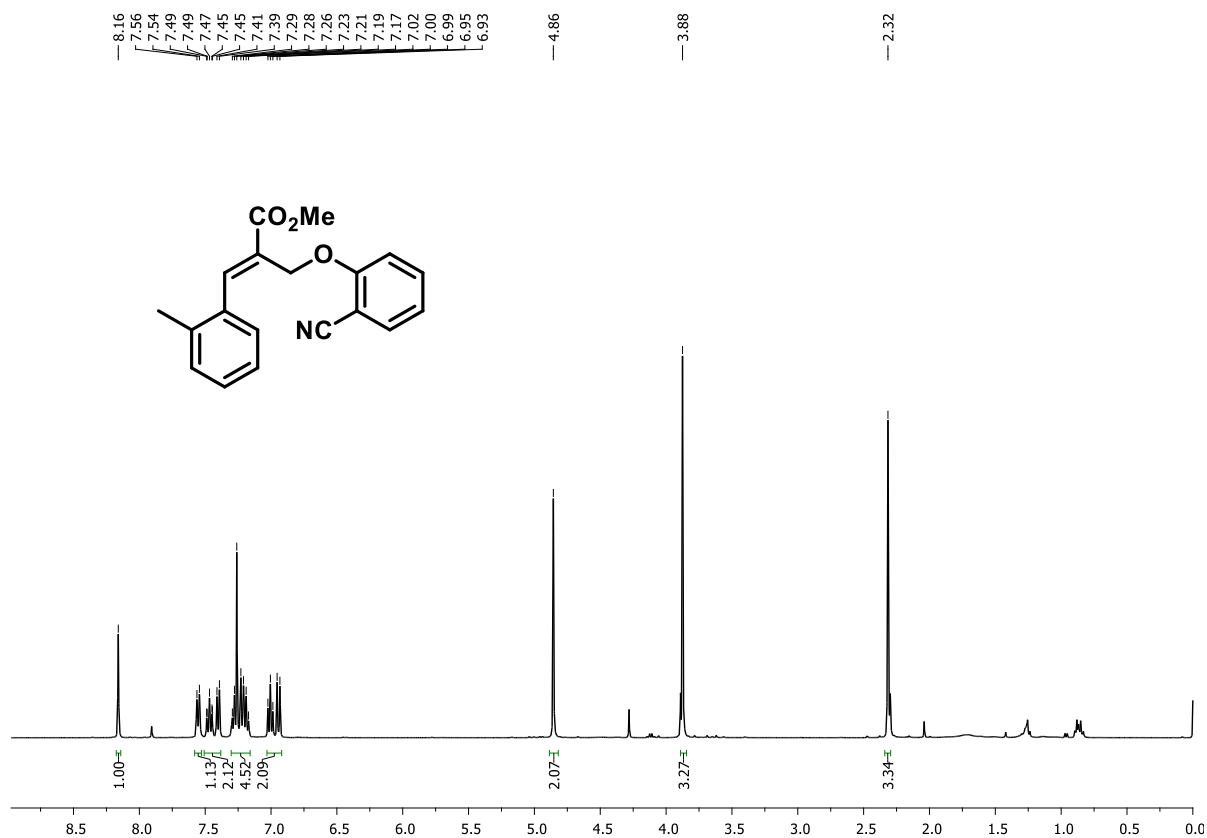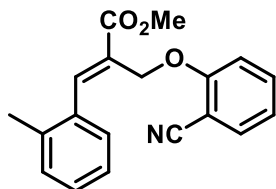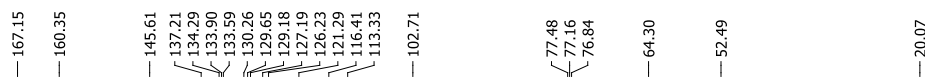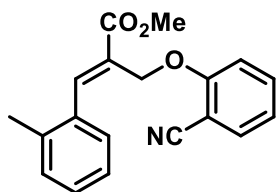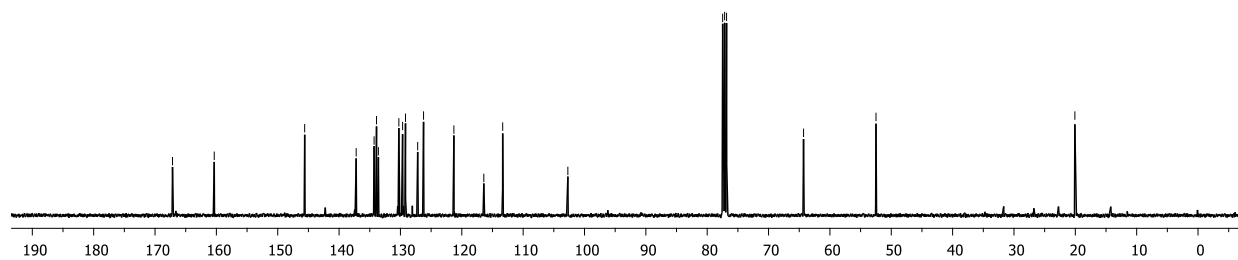

Methyl (*E*)-2-((2-cyanophenoxy) methyl)-3-(2-methoxyphenyl) acrylate (**1e**)

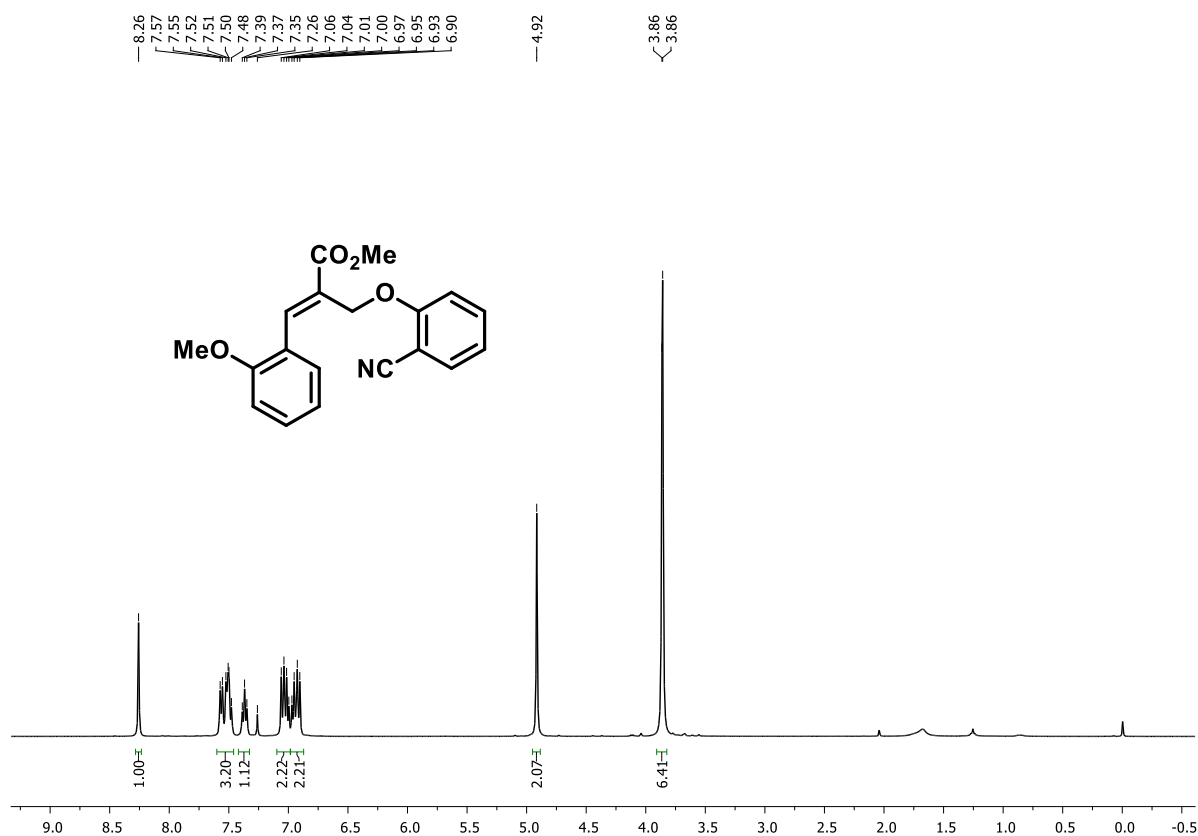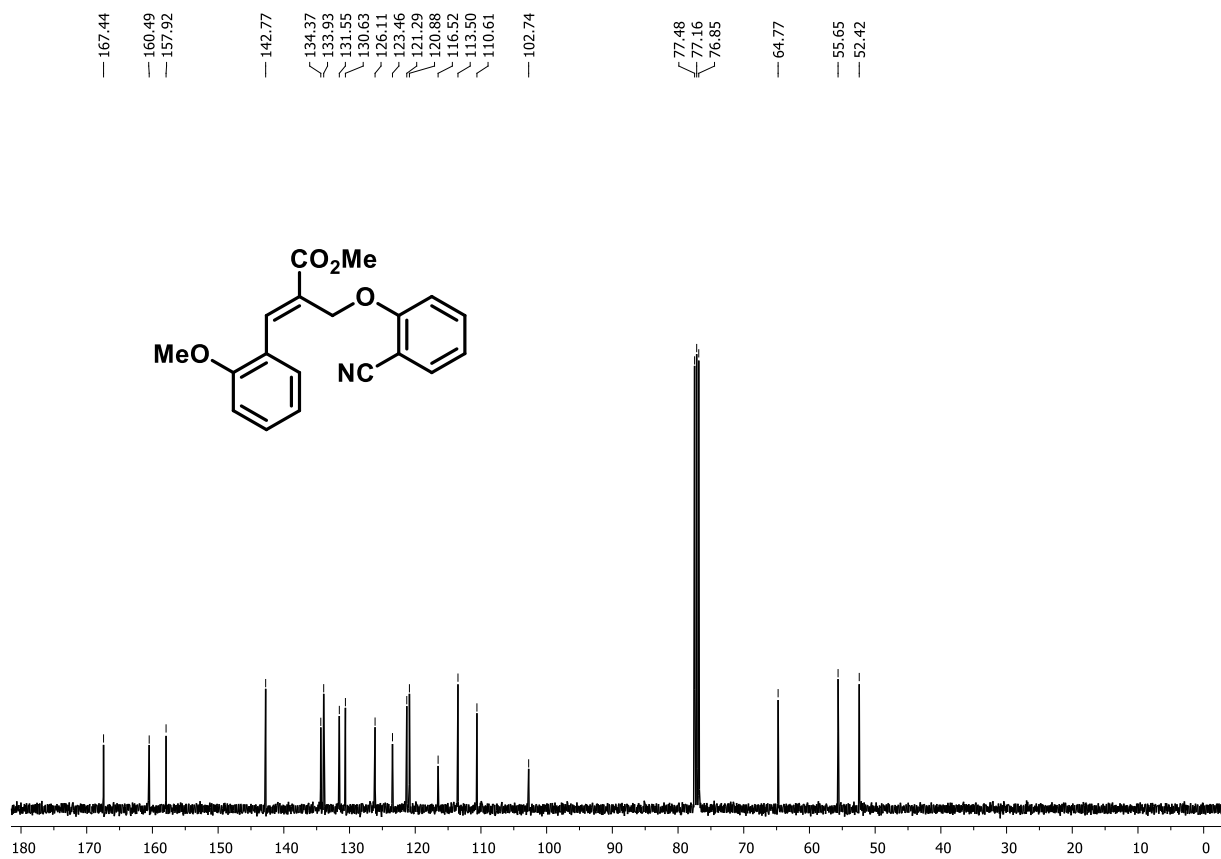

Methyl (*E*)-2-((2-cyanophenoxy) methyl)-3-(2-fluorophenyl) acrylate (**1f**)

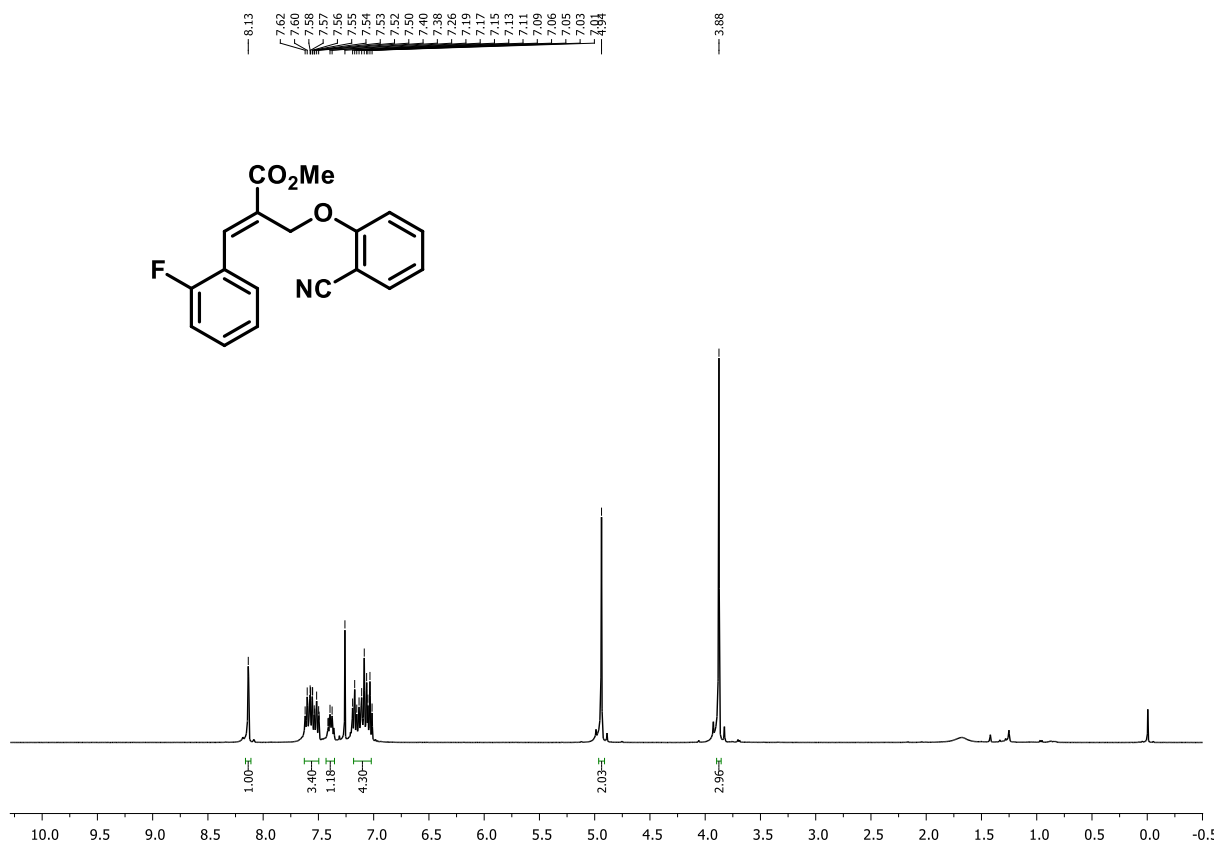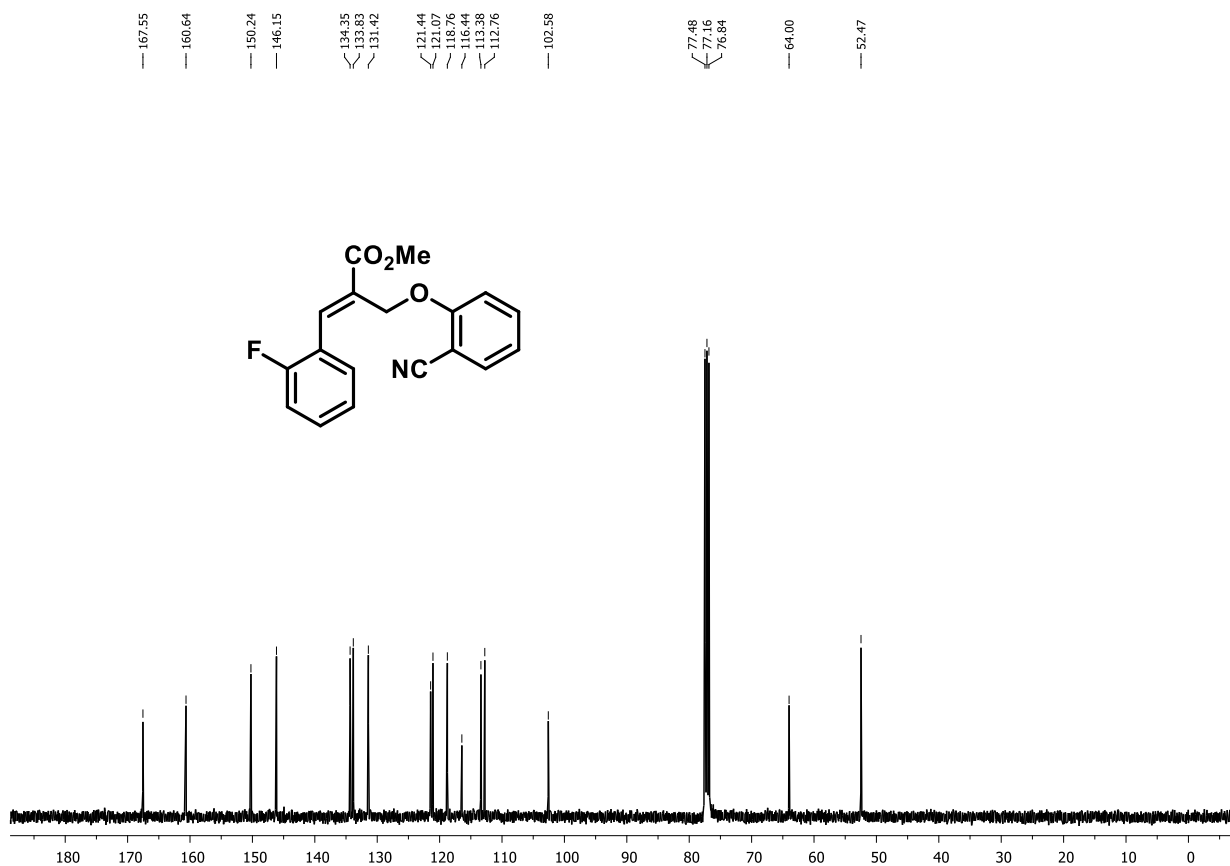

Methyl (*E*)-3-(2-chlorophenyl)-2-((2-cyanophenoxy)methyl)acrylate (1g)

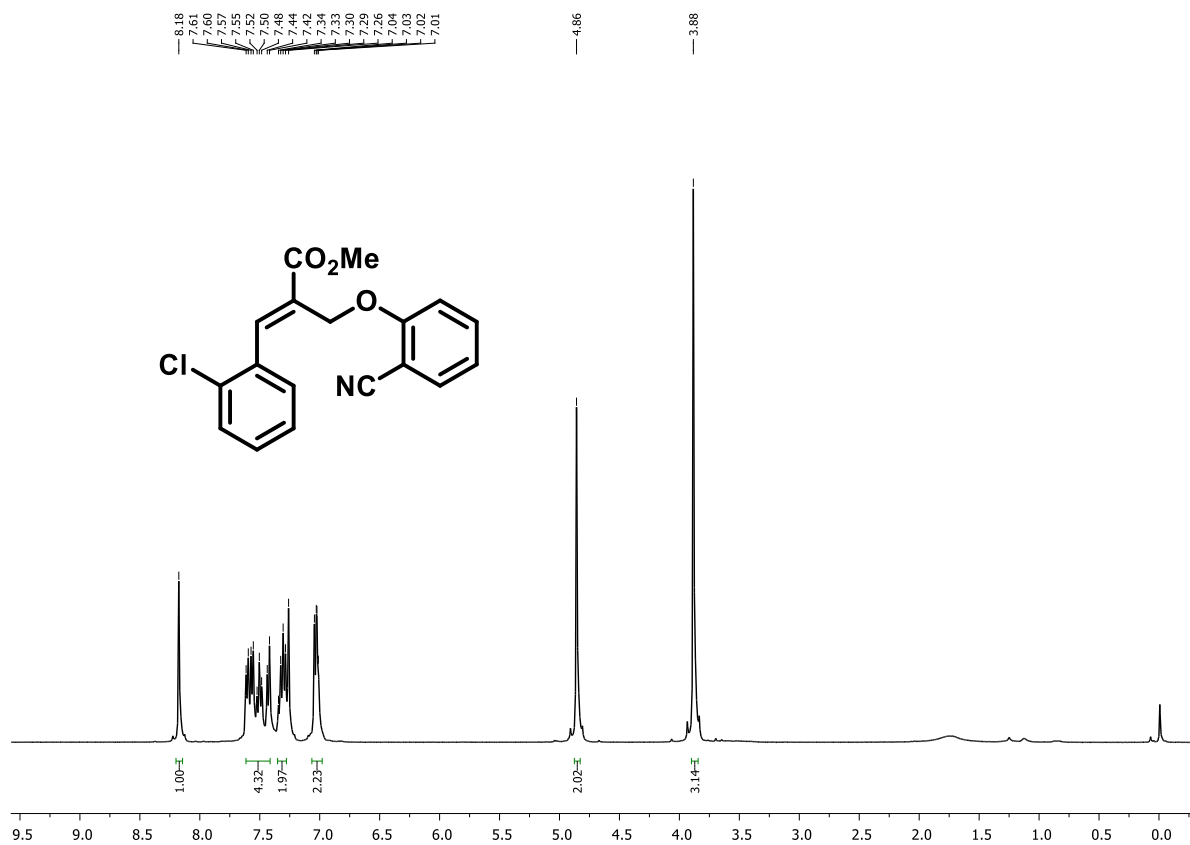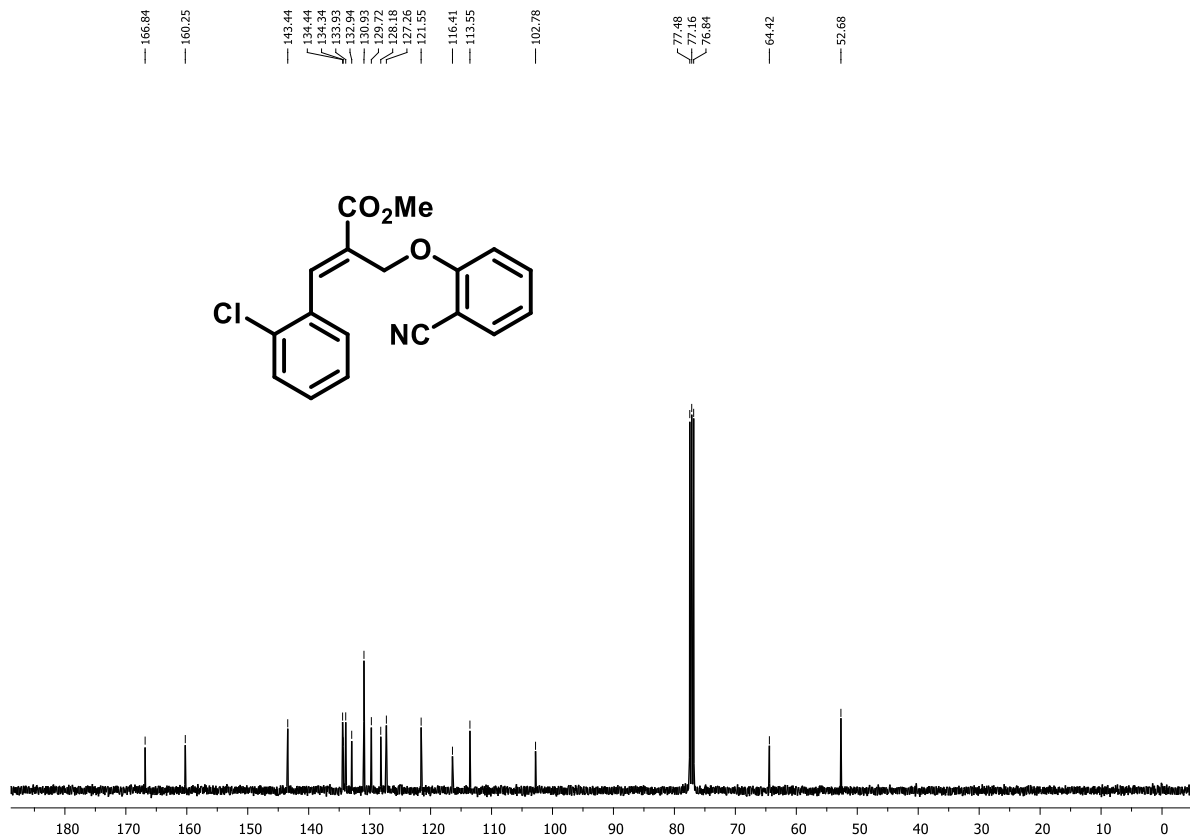

Methyl (*E*)-3-(2-bromophenyl)-2-((2-cyanophenoxy)methyl)acrylate (**1i**)

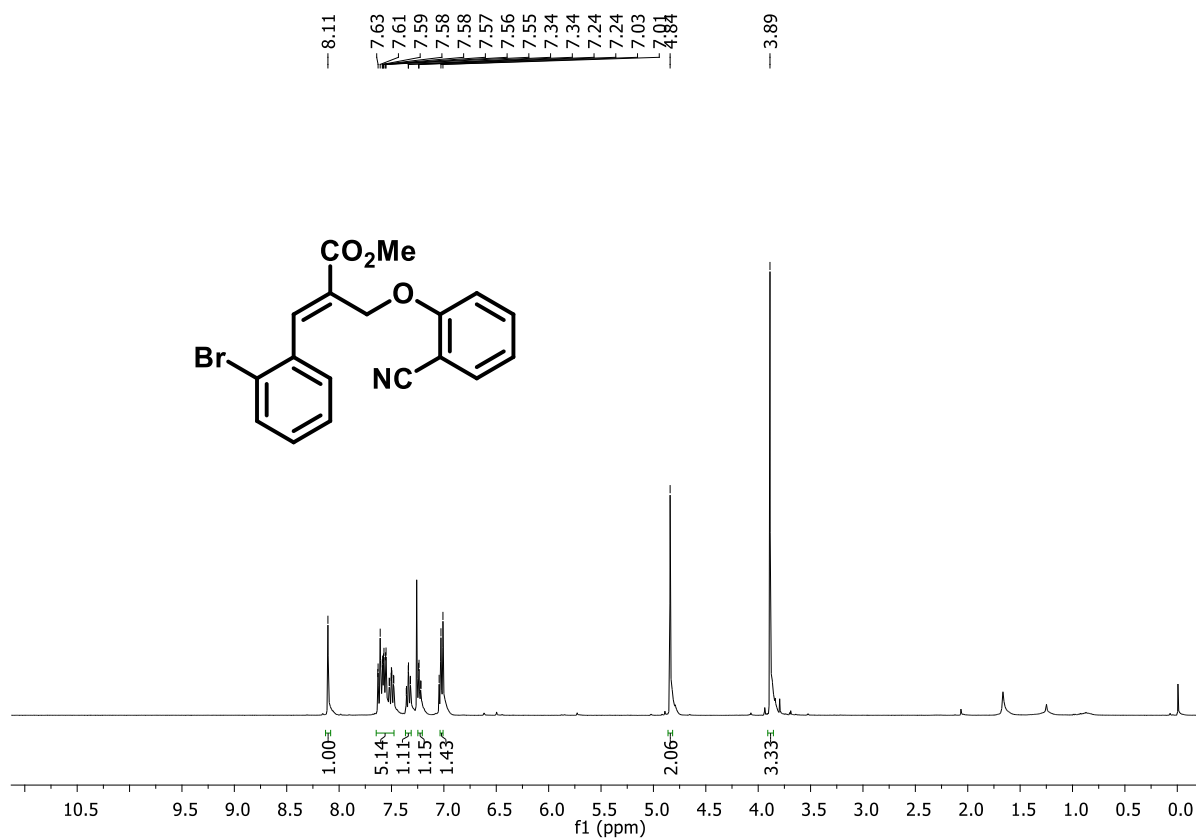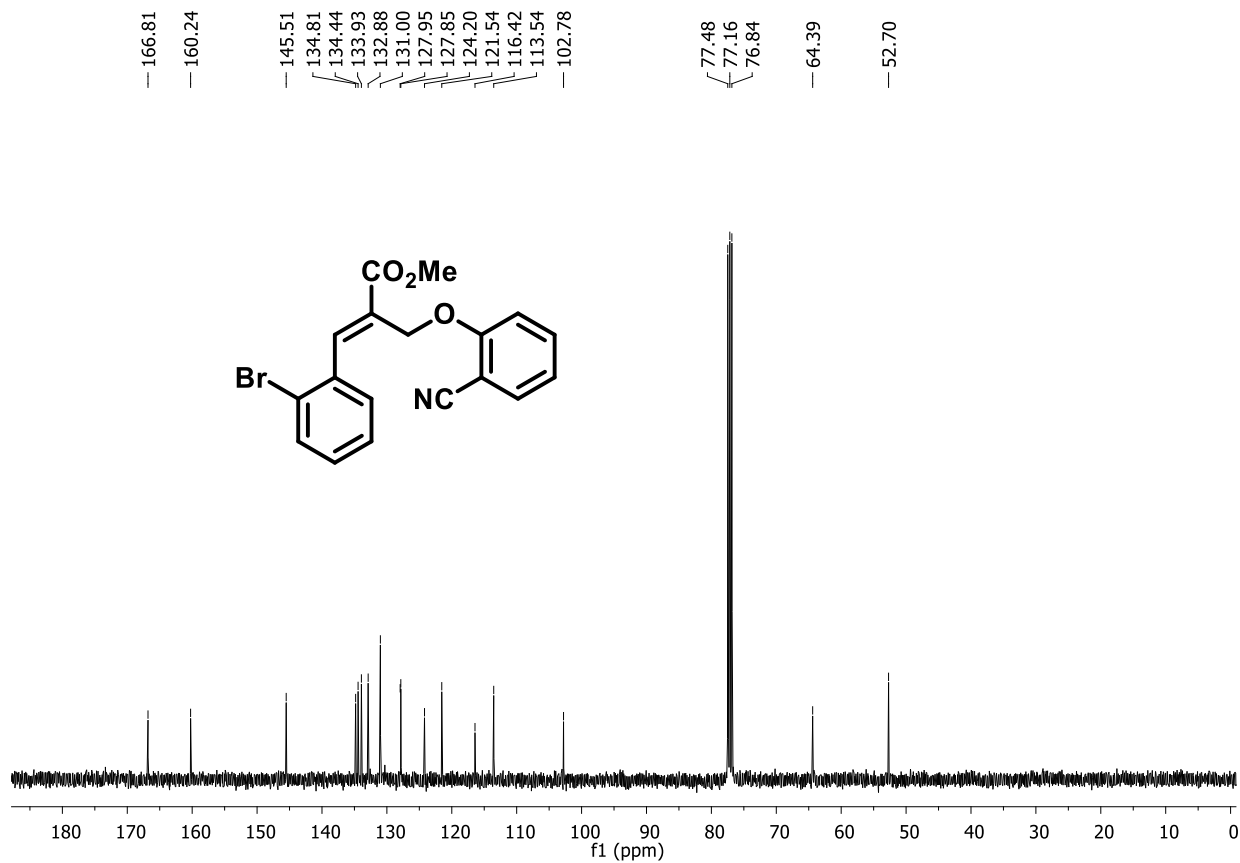



Methyl (*E*)-2-((2-cyanophenoxy) methyl)-3-(*p*-tolyl) acrylate (**1j**)

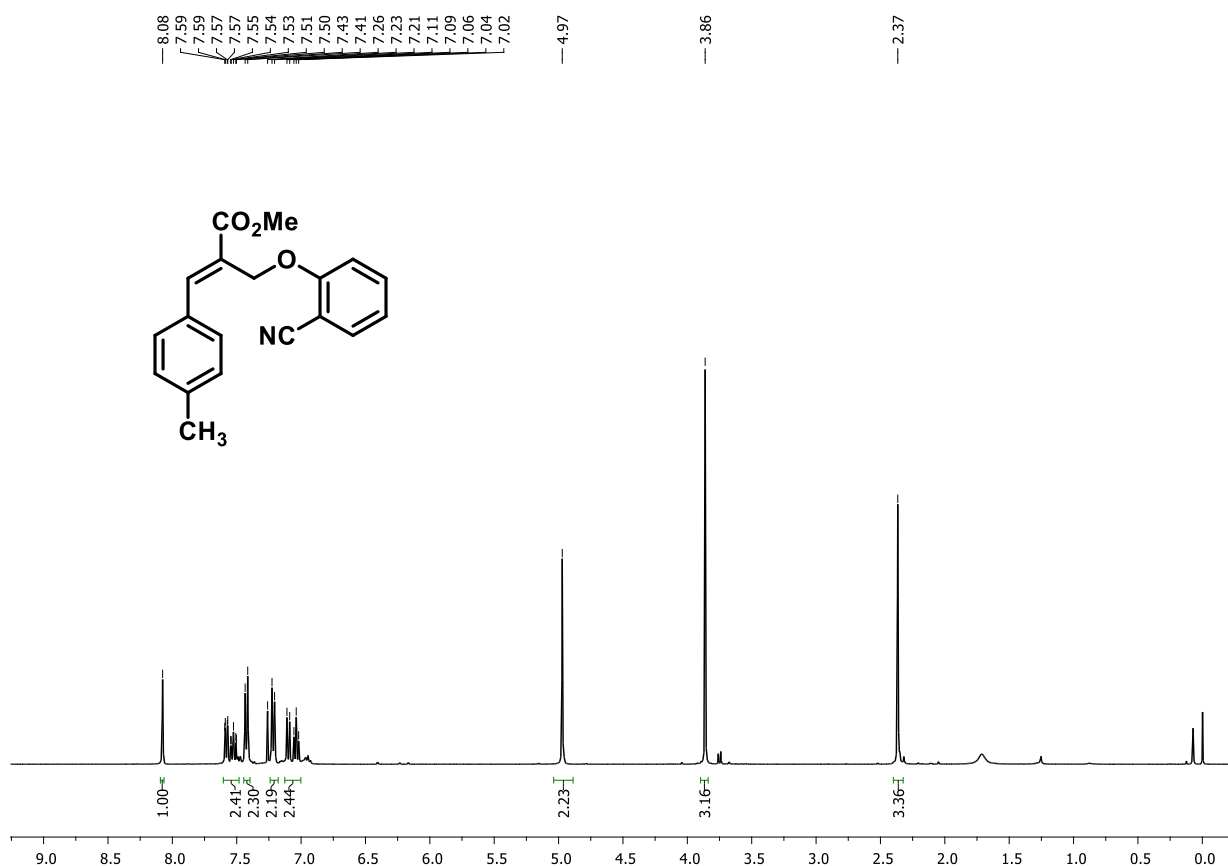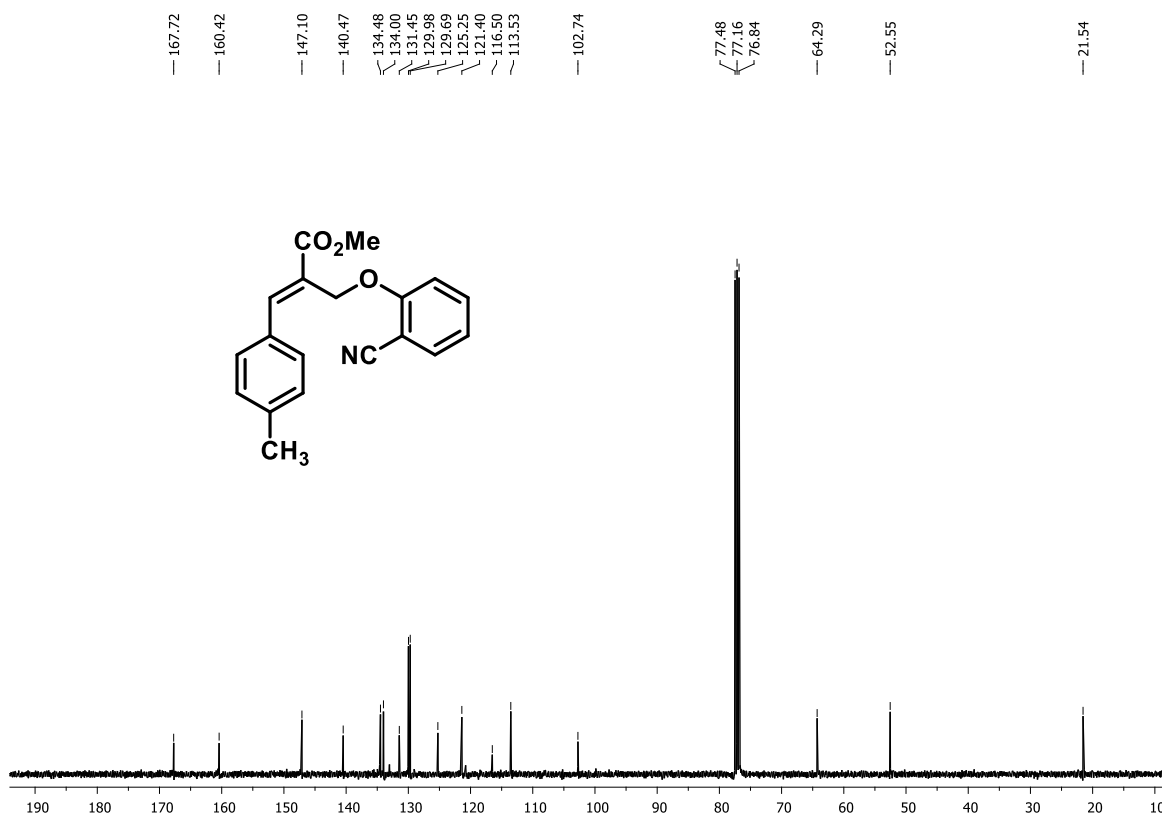

Methyl (*E*)-2-((2-cyanophenoxy) methyl)-3-(4-ethylphenyl) acrylate (1k)

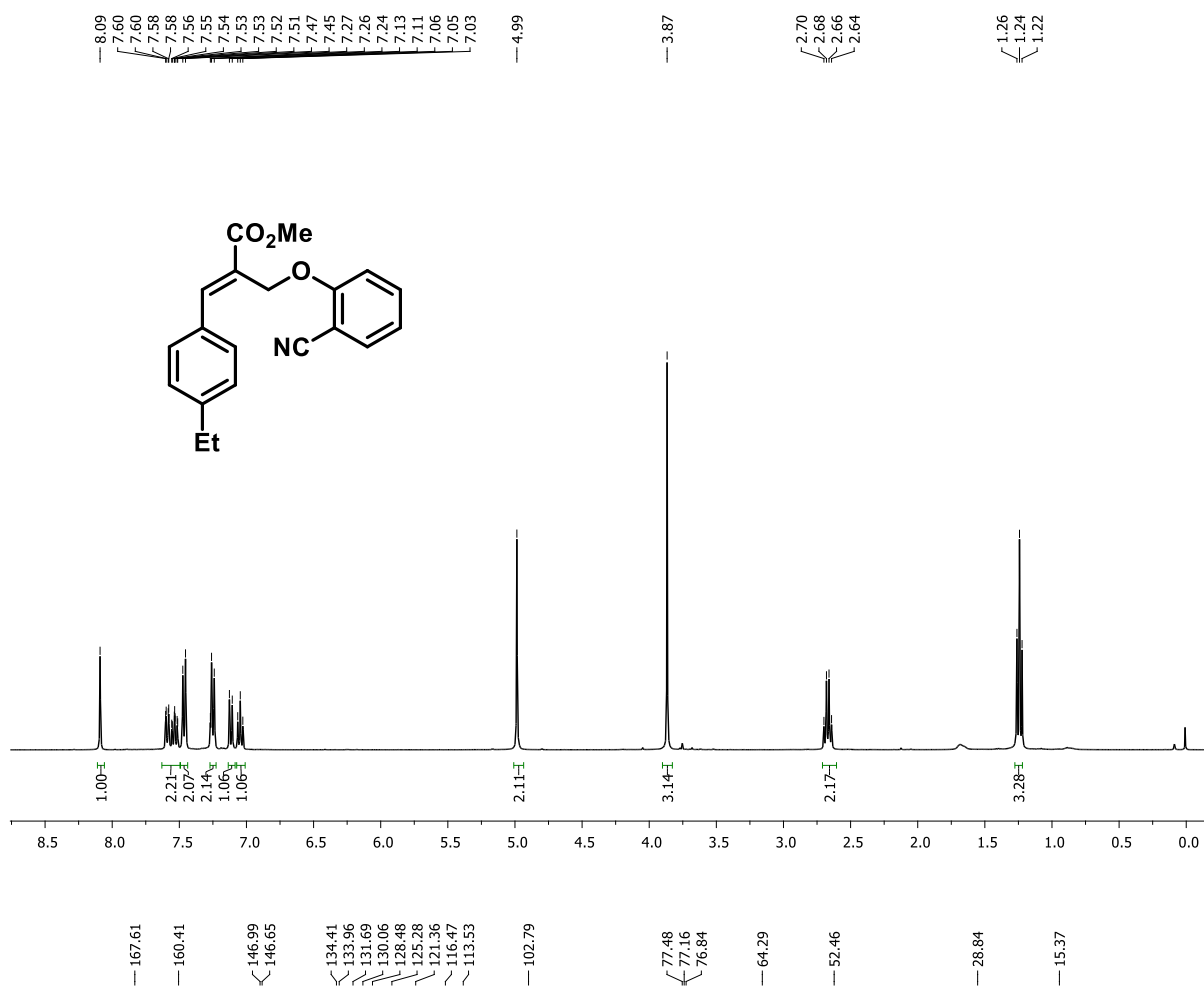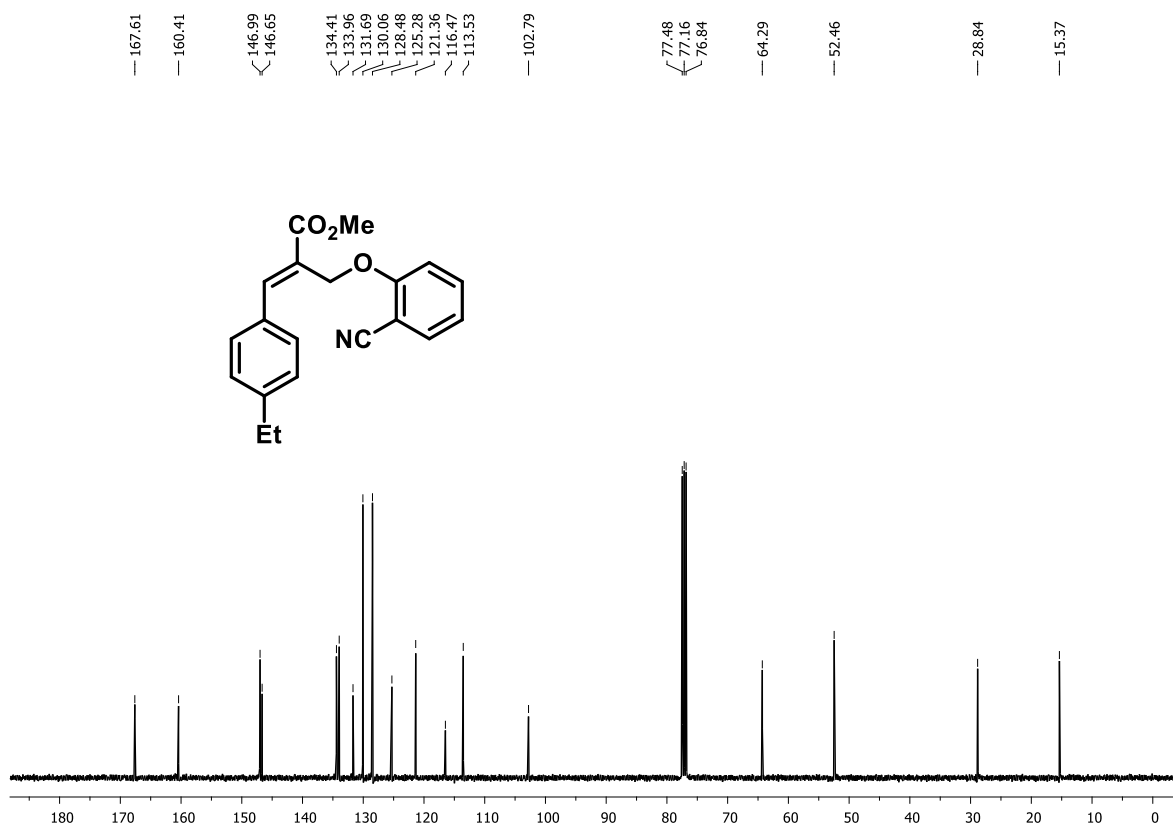

Methyl (*E*)-2-((2-cyanophenoxy) methyl)-3-(4-isopropylphenyl) acrylate (**11**)

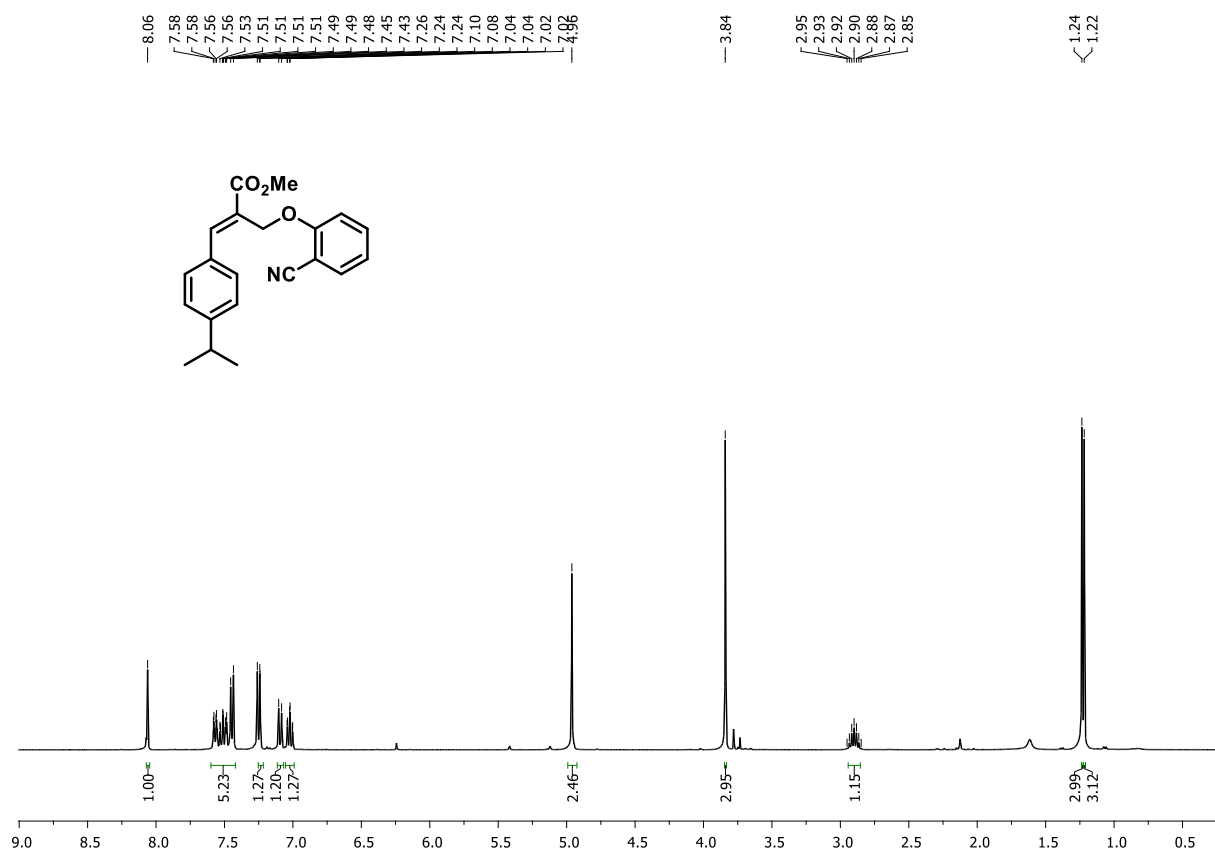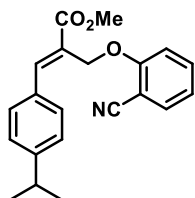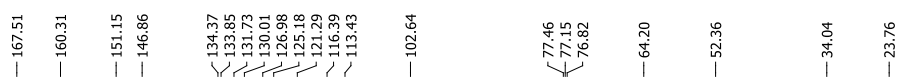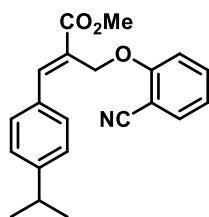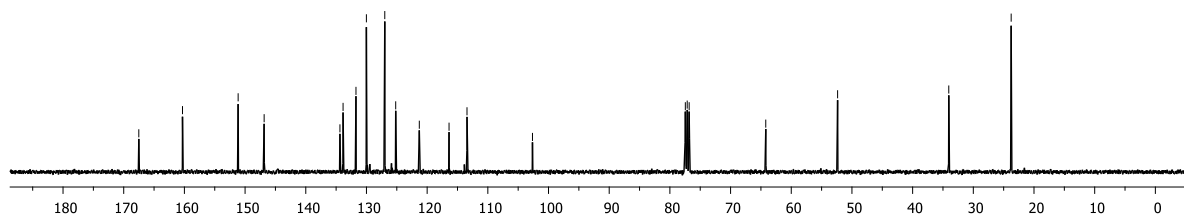

Methyl (*E*)-2-((2-cyanophenoxy) methyl)-3-(4-methoxyphenyl) acrylate (**1m**)

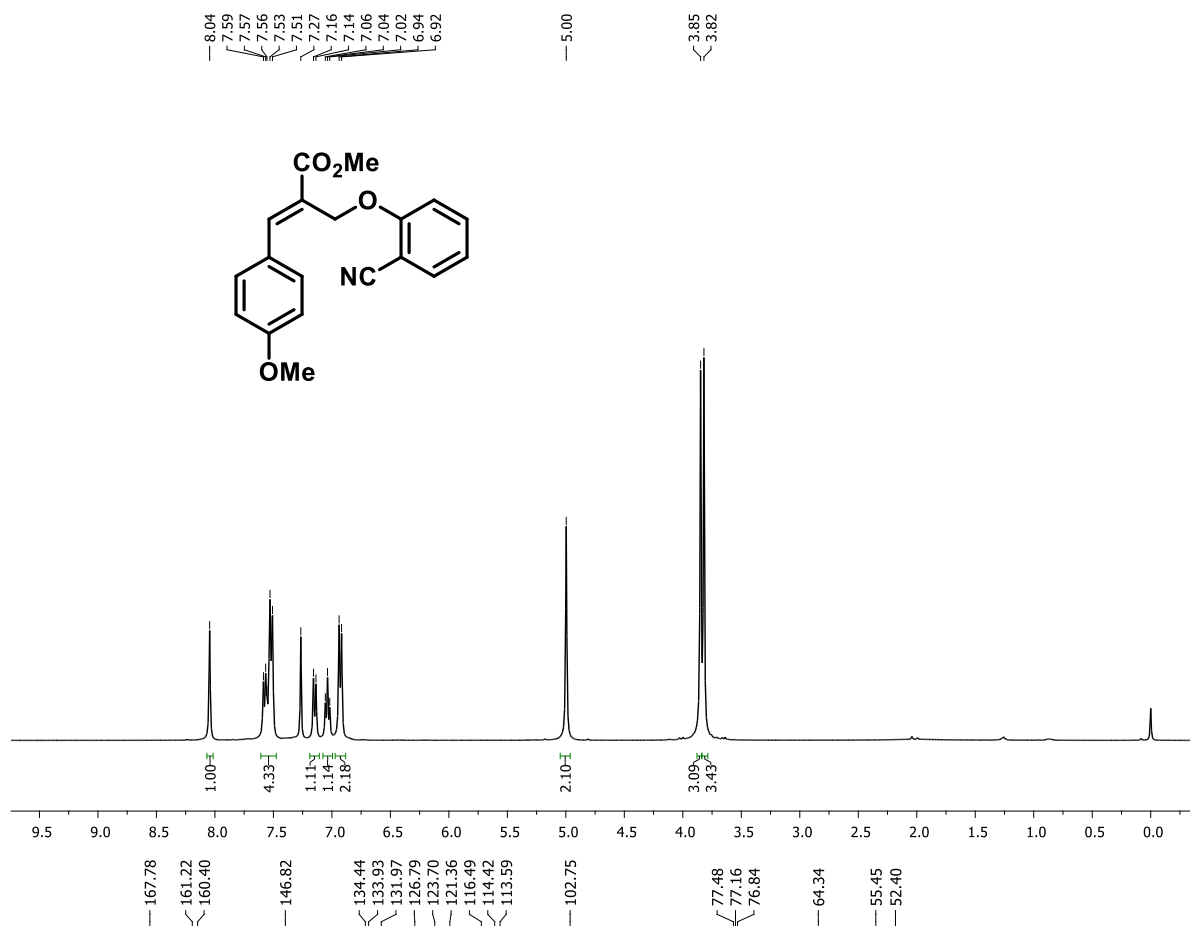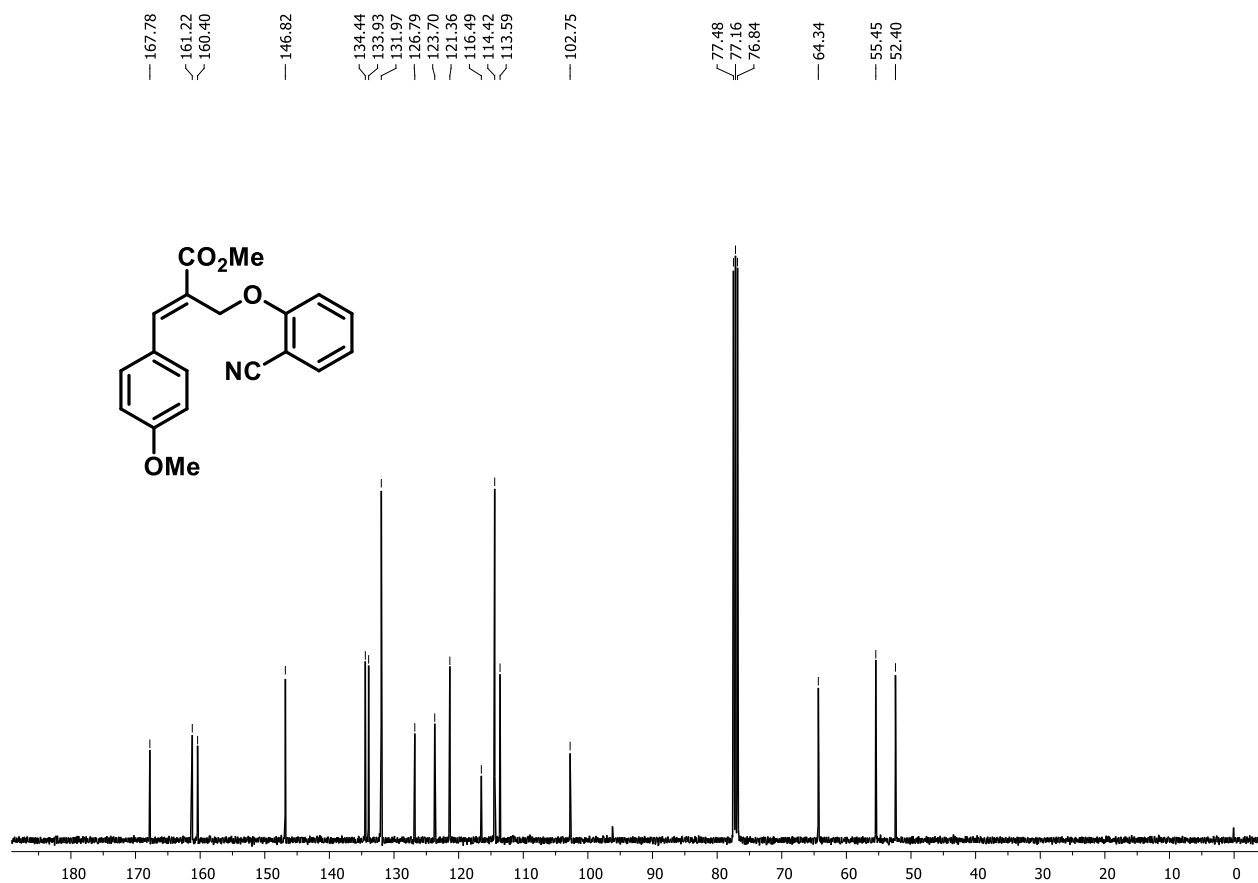

Methyl (*E*)-3-(benzo[d][1,3]dioxol-5-yl)-2-((2-cyanophenoxy) methyl) acrylate (1n)

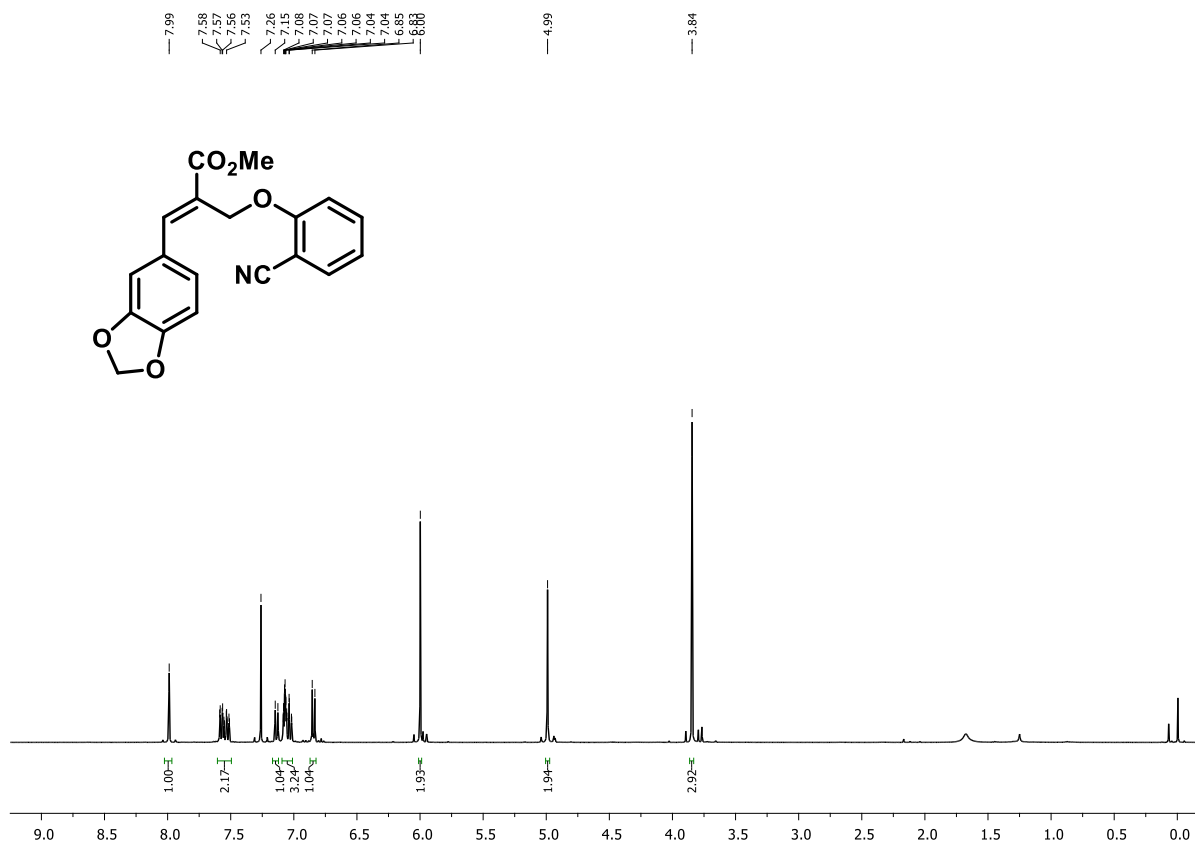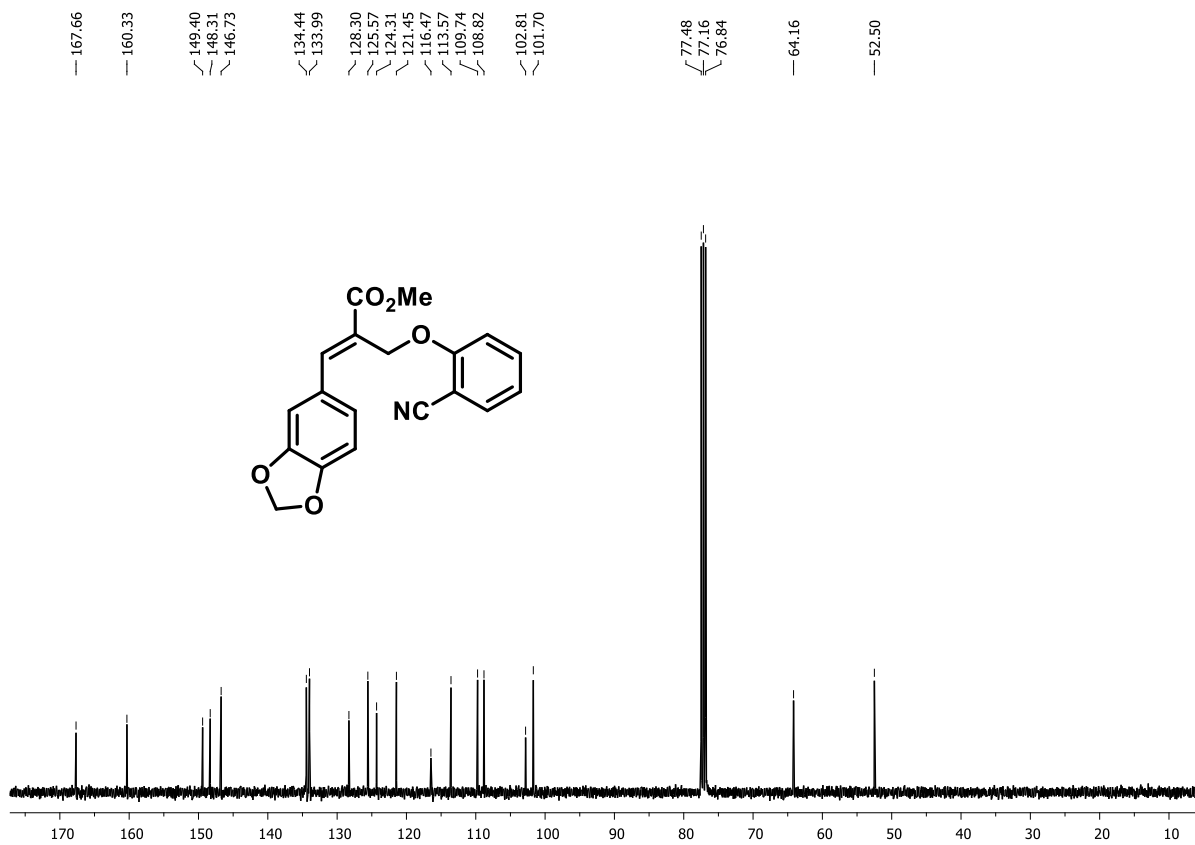

Methyl (*E*)-2-((2-cyanophenoxy) methyl)-3-(4-fluorophenyl) acrylate (**1o**)

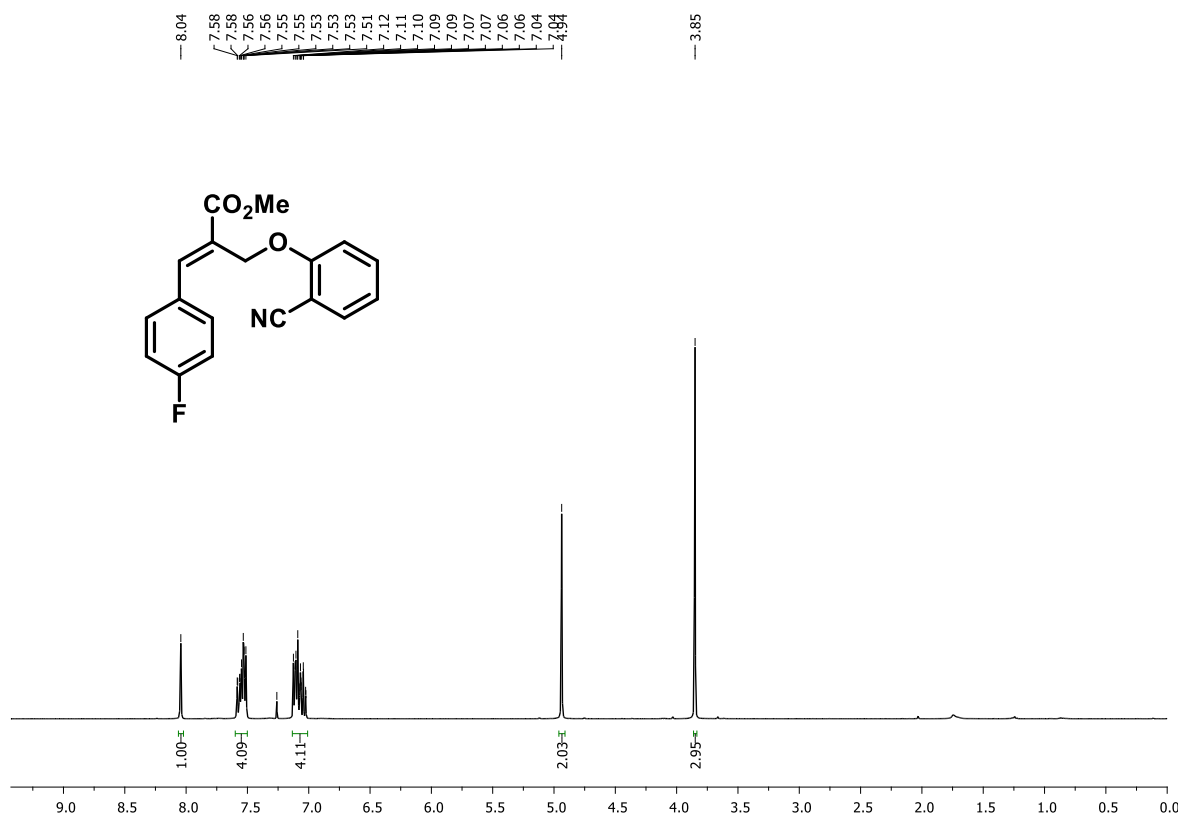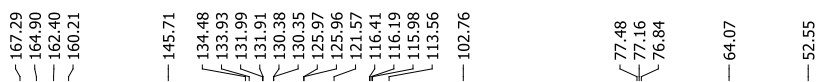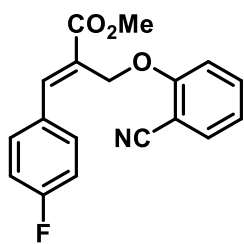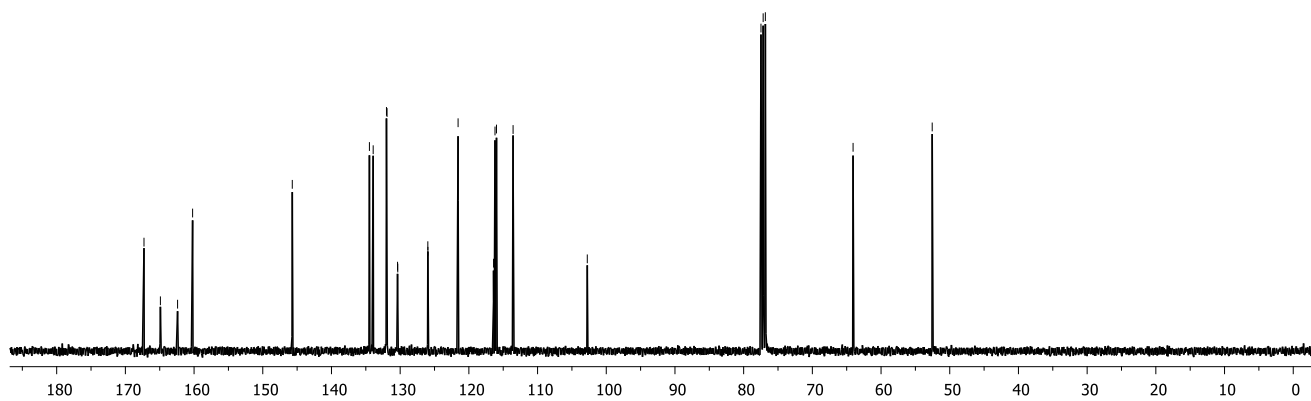

Methyl (*E*)-3-(4-chlorophenyl)-2-((2-cyanophenoxy) methyl) acrylate (1p)

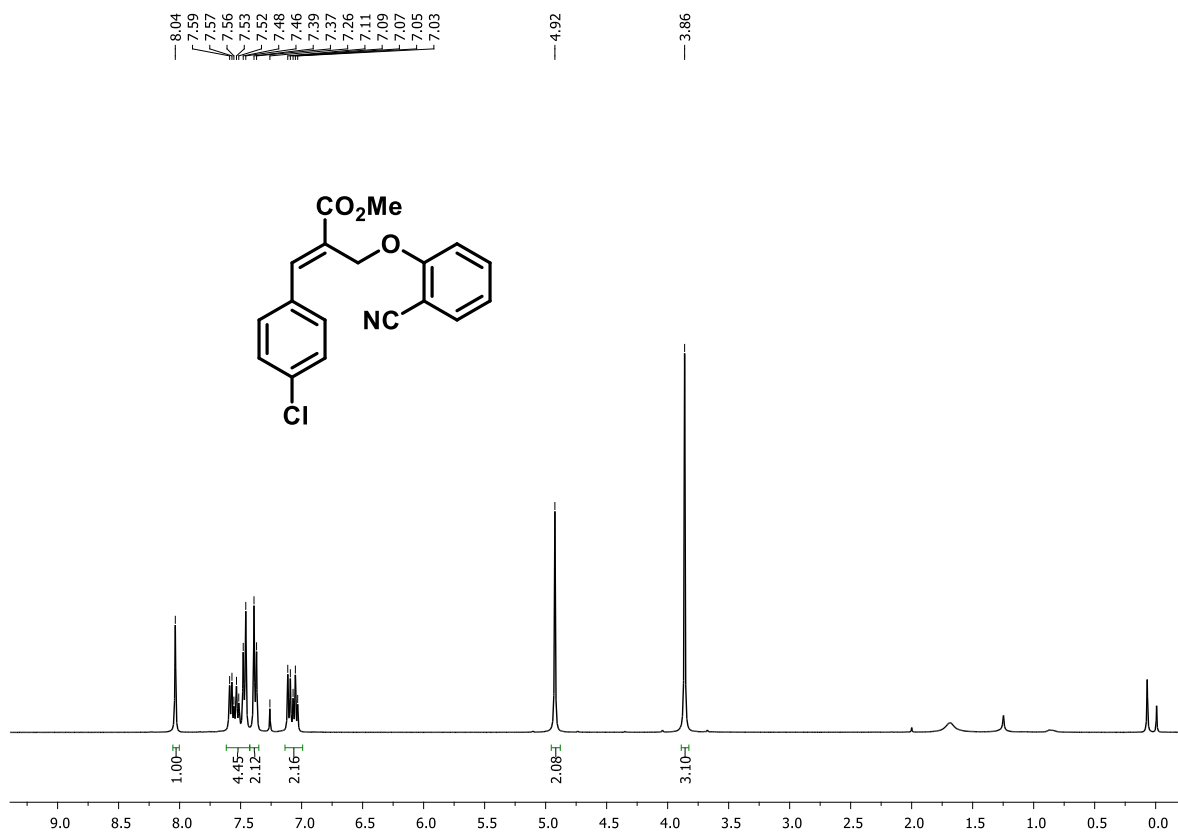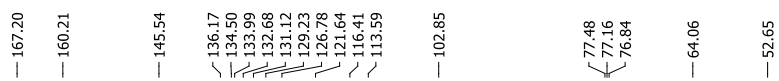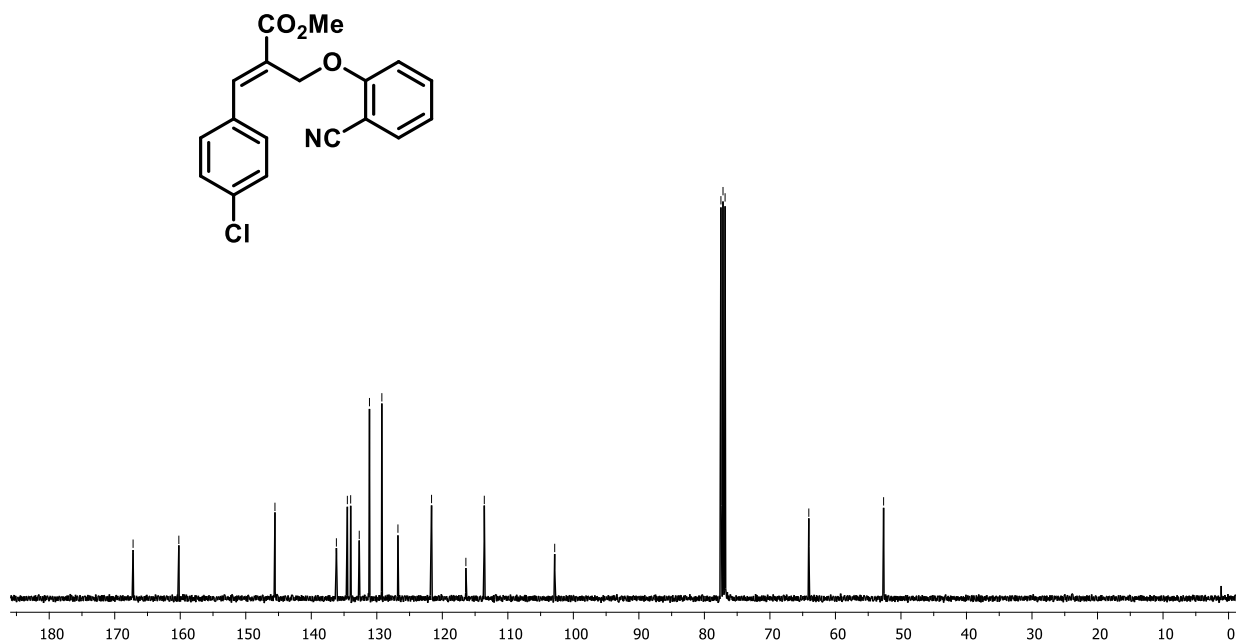

Methyl (*E*)-3-(4-bromophenyl)-2-((2-cyanophenoxy)methyl)acrylate (**1q**):

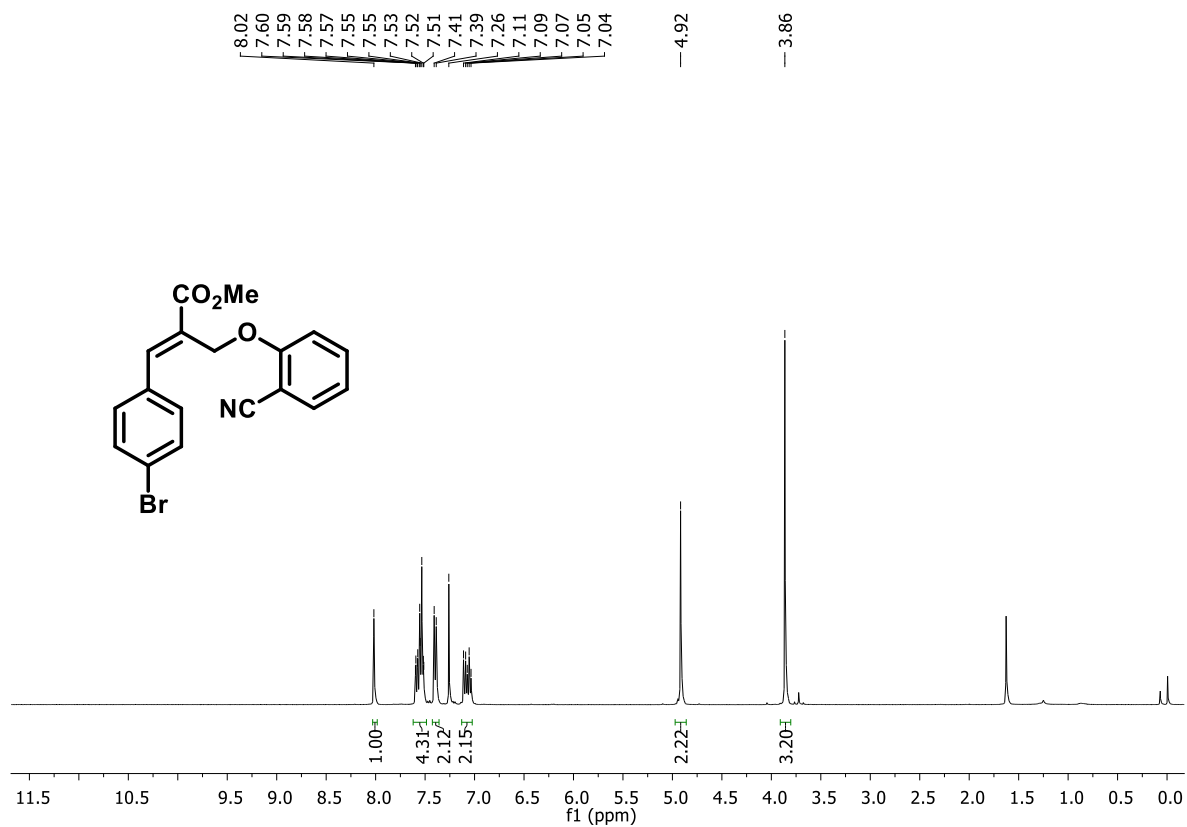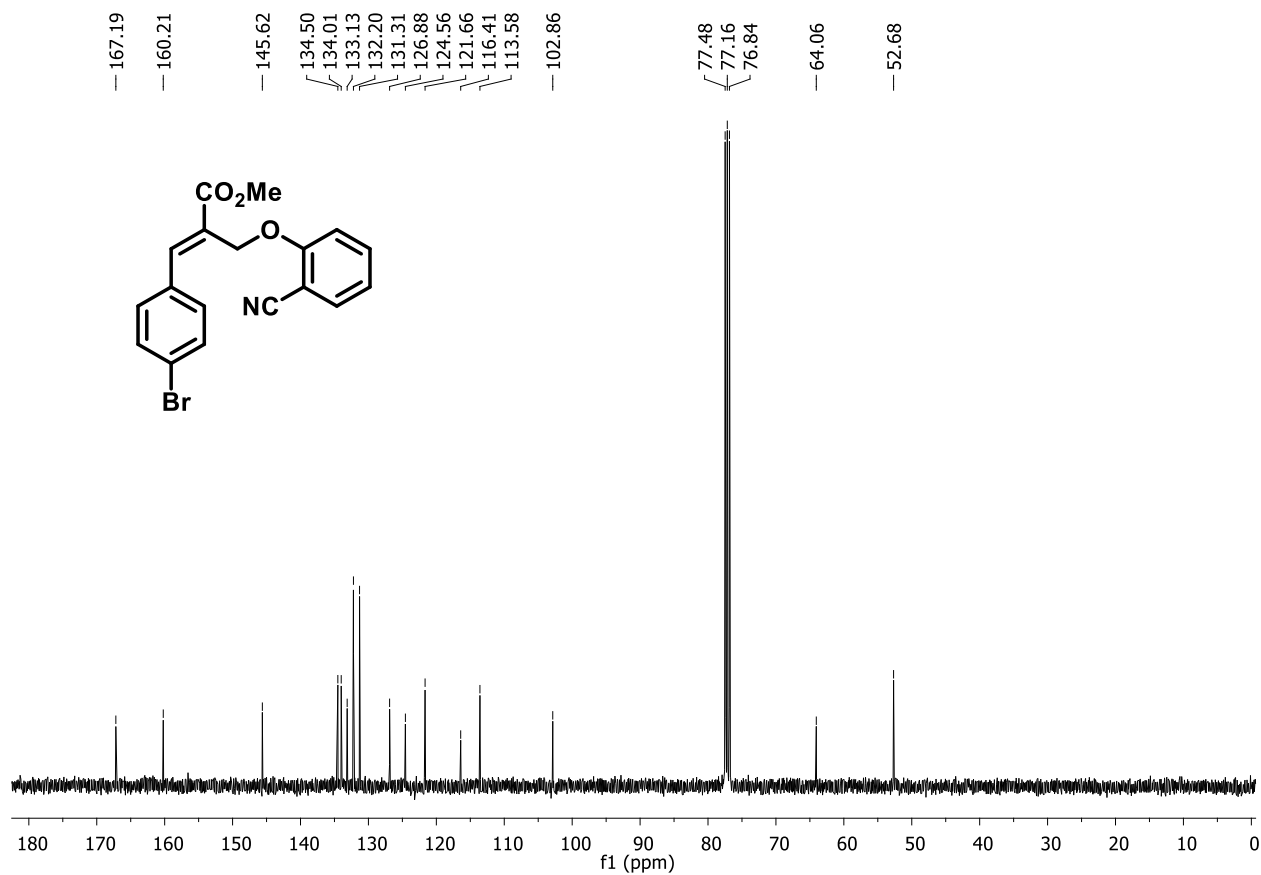



Methyl (*E*)-2-((2-cyanophenoxy) methyl)-3-(furan-2-yl)acrylate (1r)

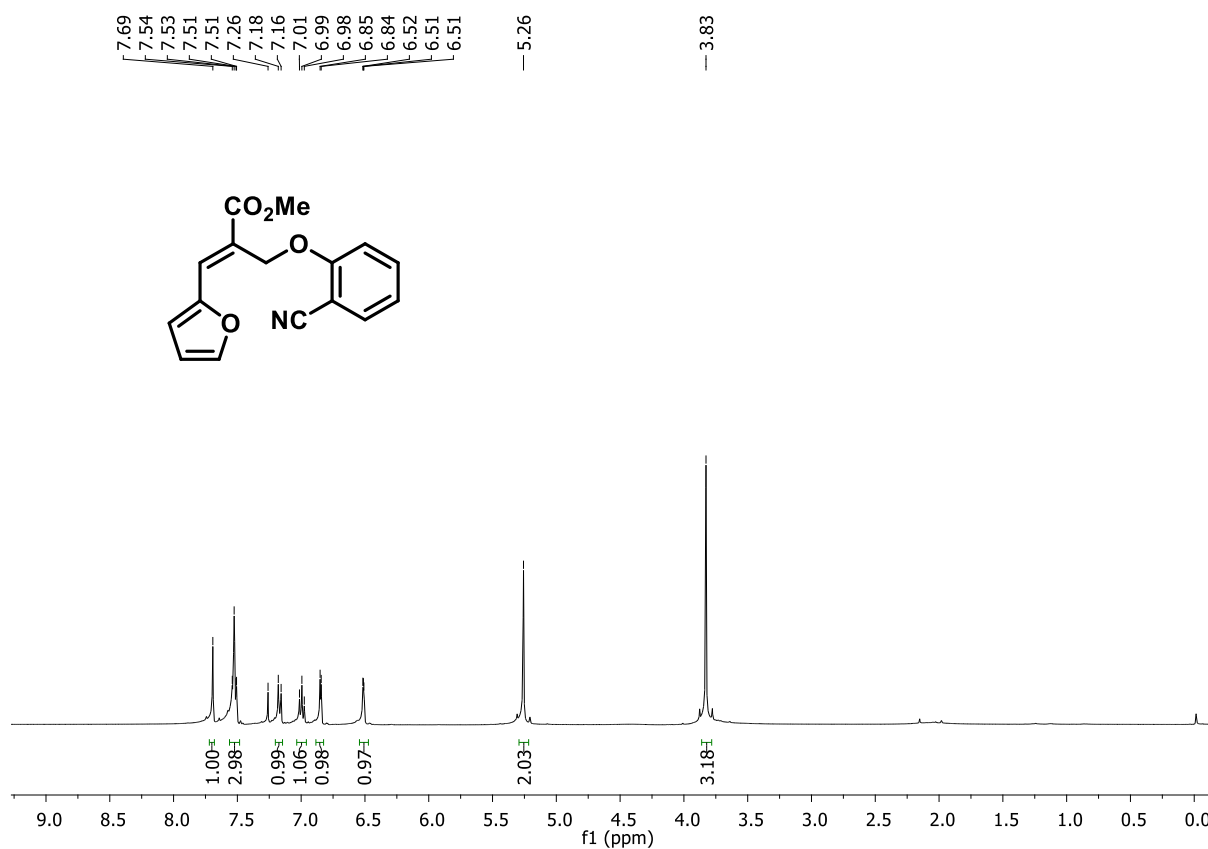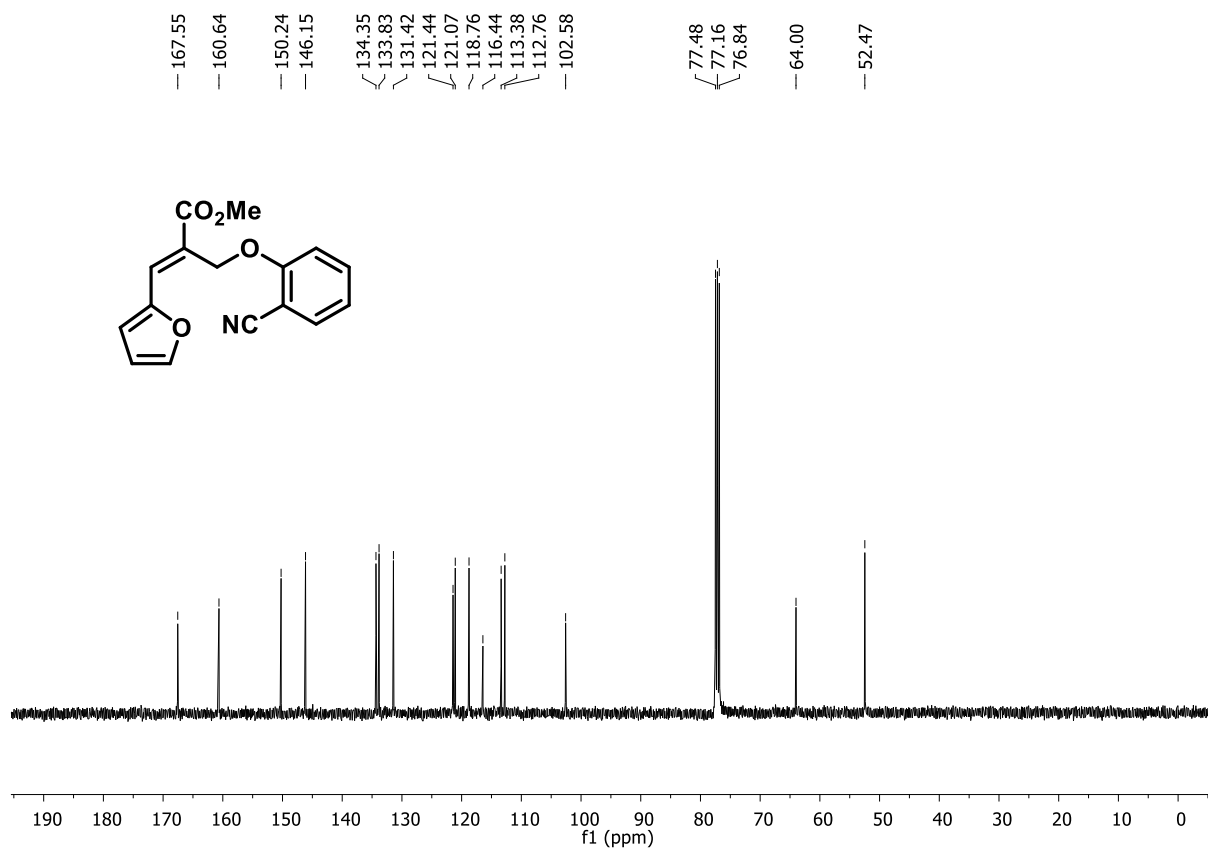

Methyl (*E*)-2-((2-cyanophenoxy) methyl)-3-(thiophen-2-yl) acrylate (**1s**)

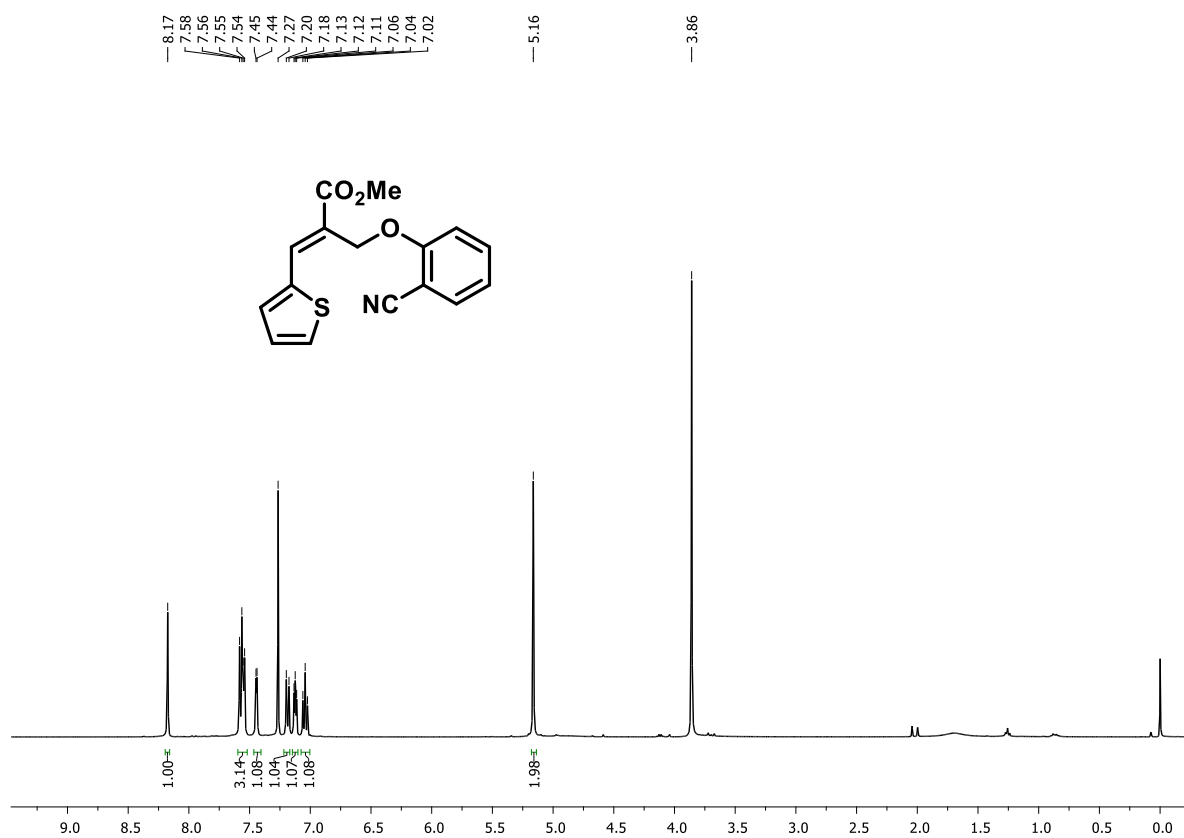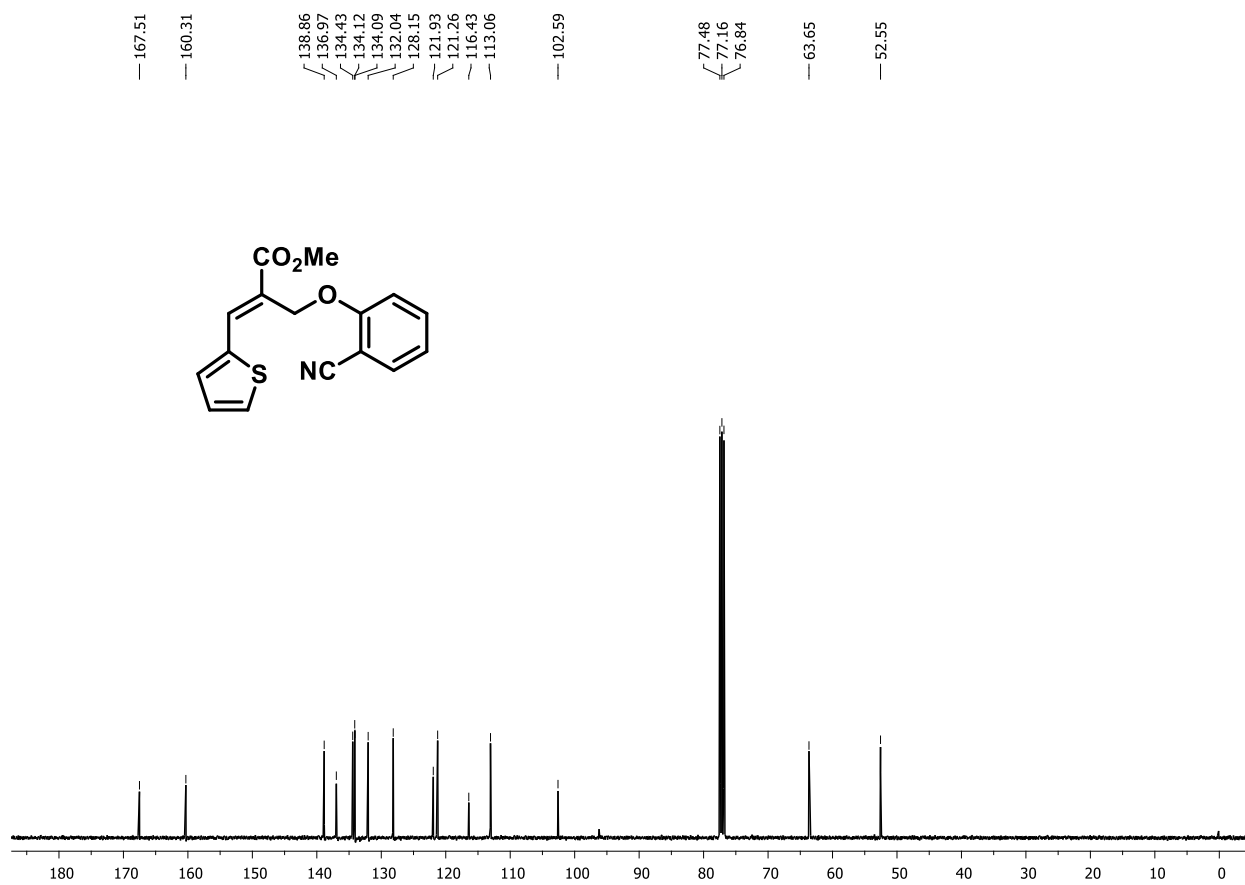

Methyl (E)-2-((2-cyanophenoxy)methyl)-3-(2-nitrophenyl)acrylate (1t)

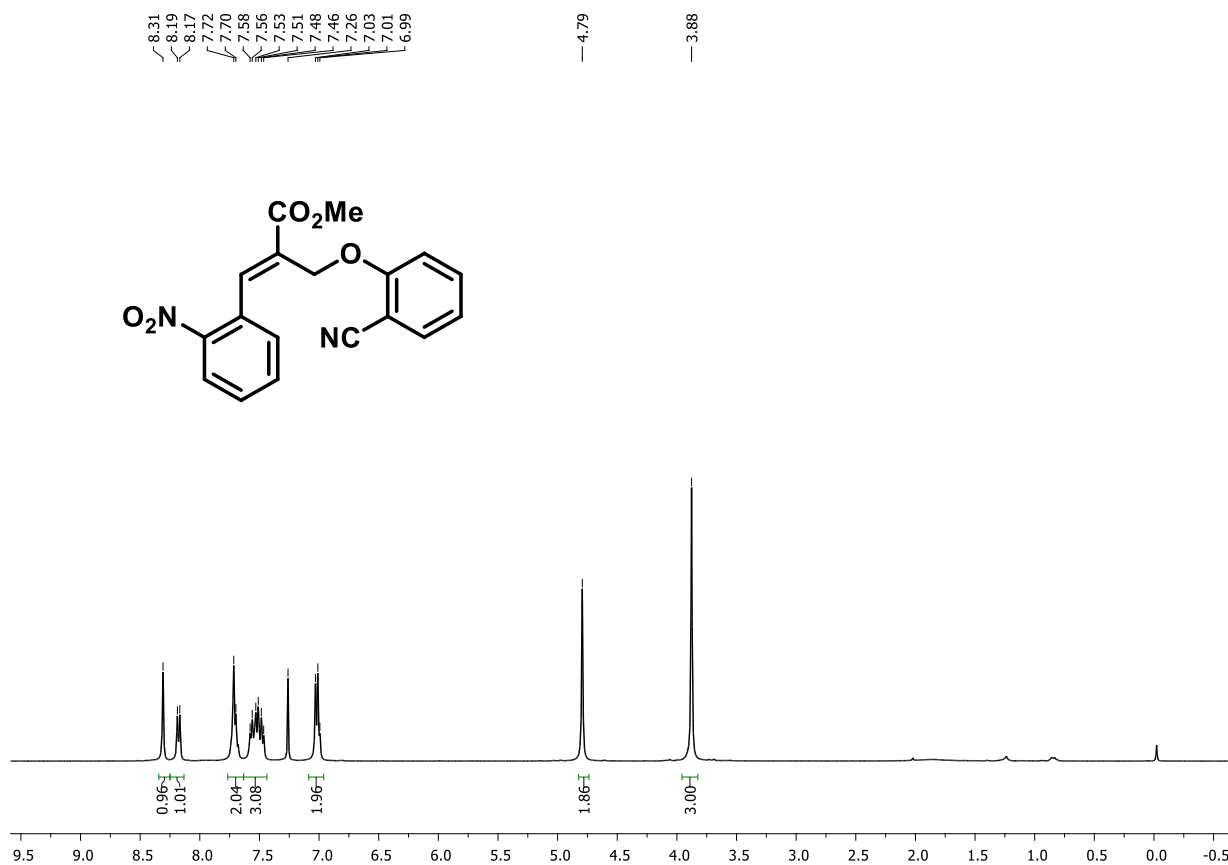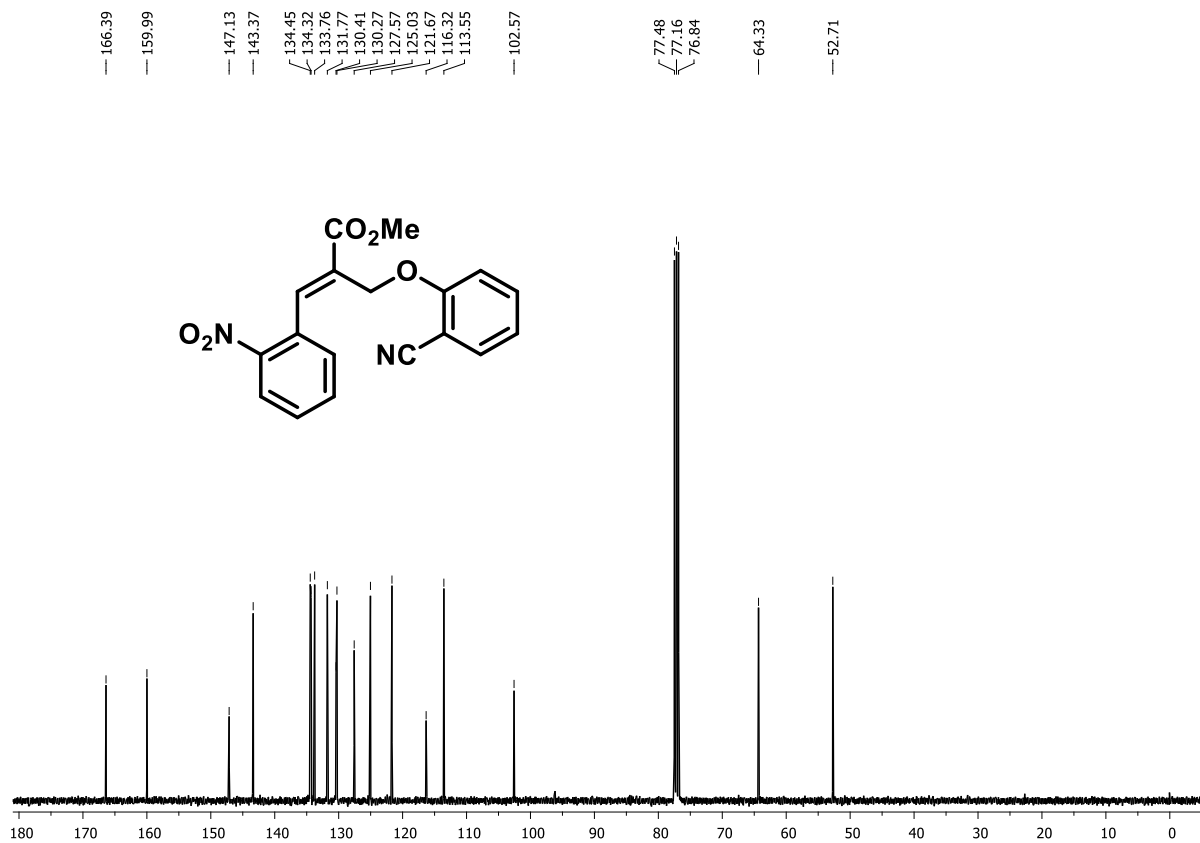

Methyl (*E*)-2-((2-cyanophenoxy) methyl)-3-(3-((*E*)-3-ethoxy-3-oxoprop-1-en-1-yl)phenyl) acrylate (3a)

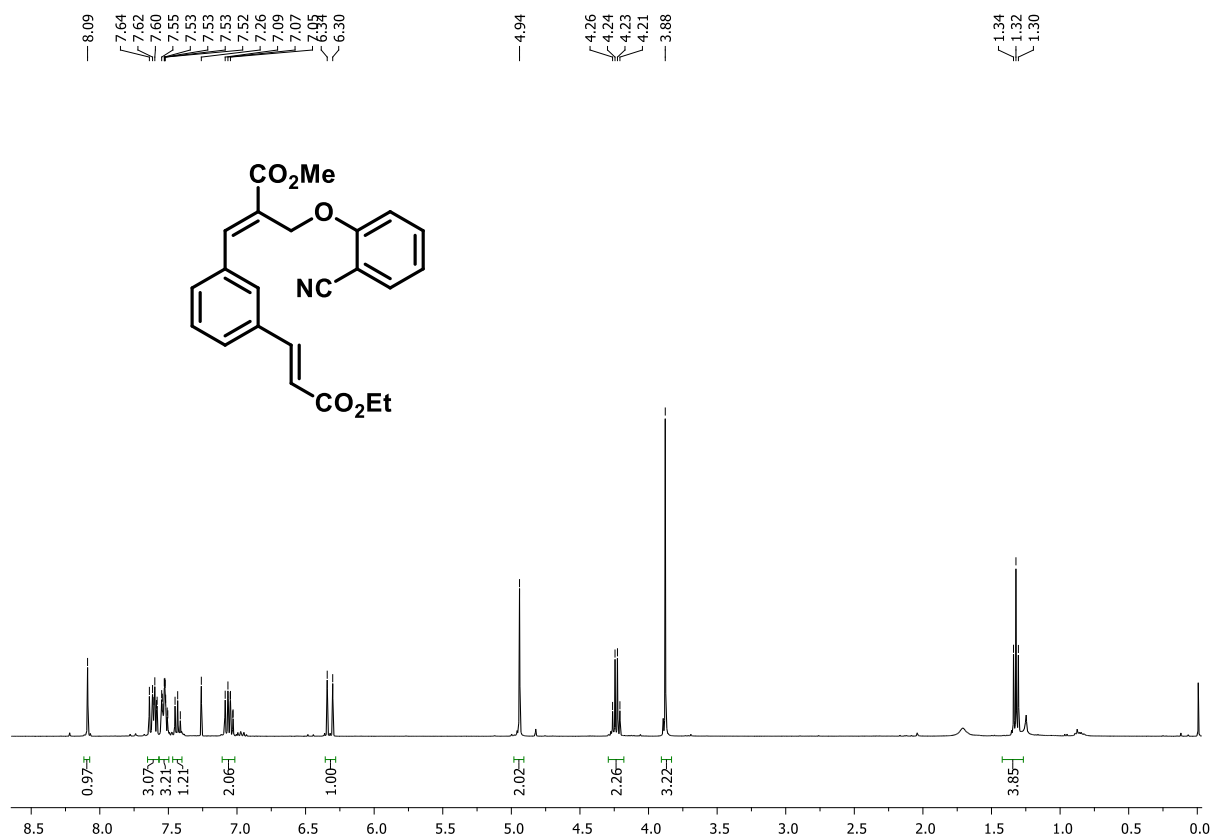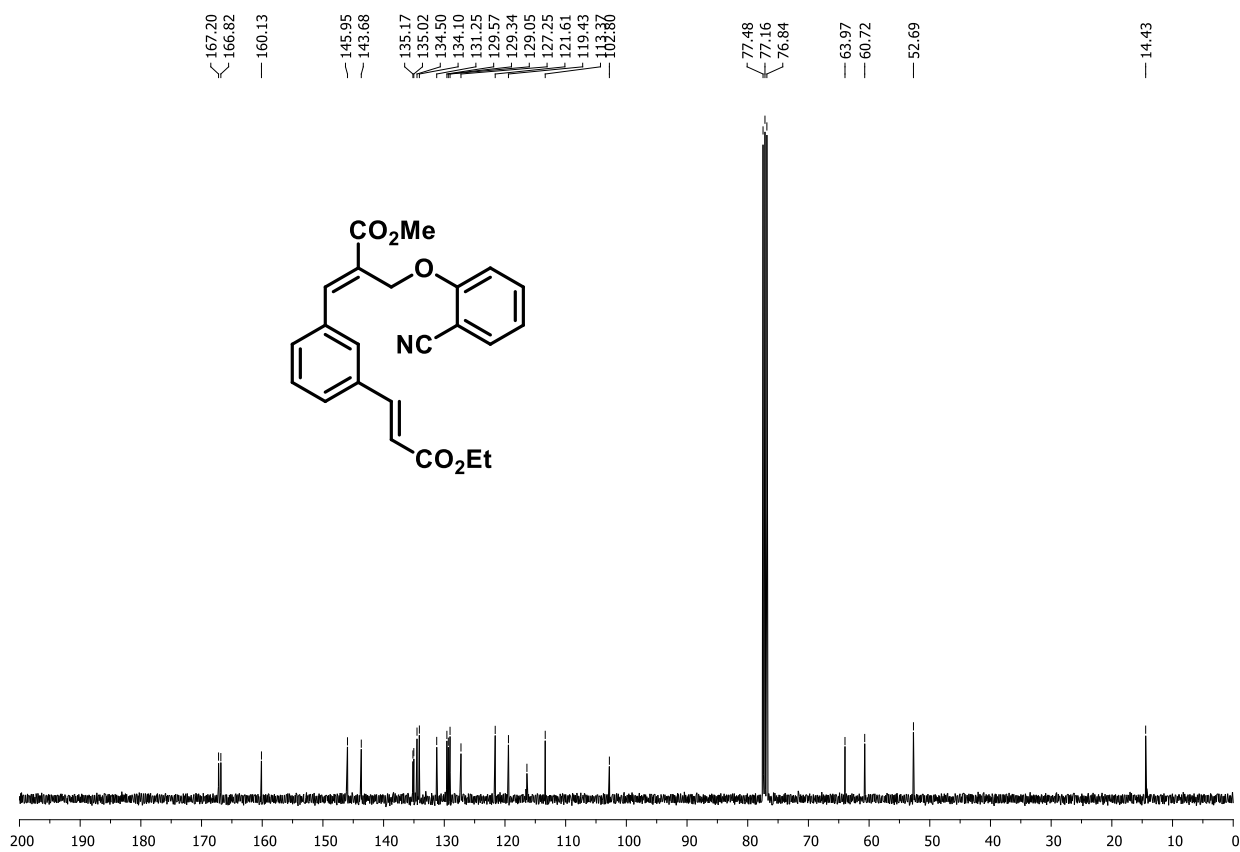

Methyl (*E*)-2-((2-cyanophenoxy)methyl)-3-(3-((*E*)-3-methoxy-3-oxoprop-1-en-1-yl) phenyl) acrylate (3b)

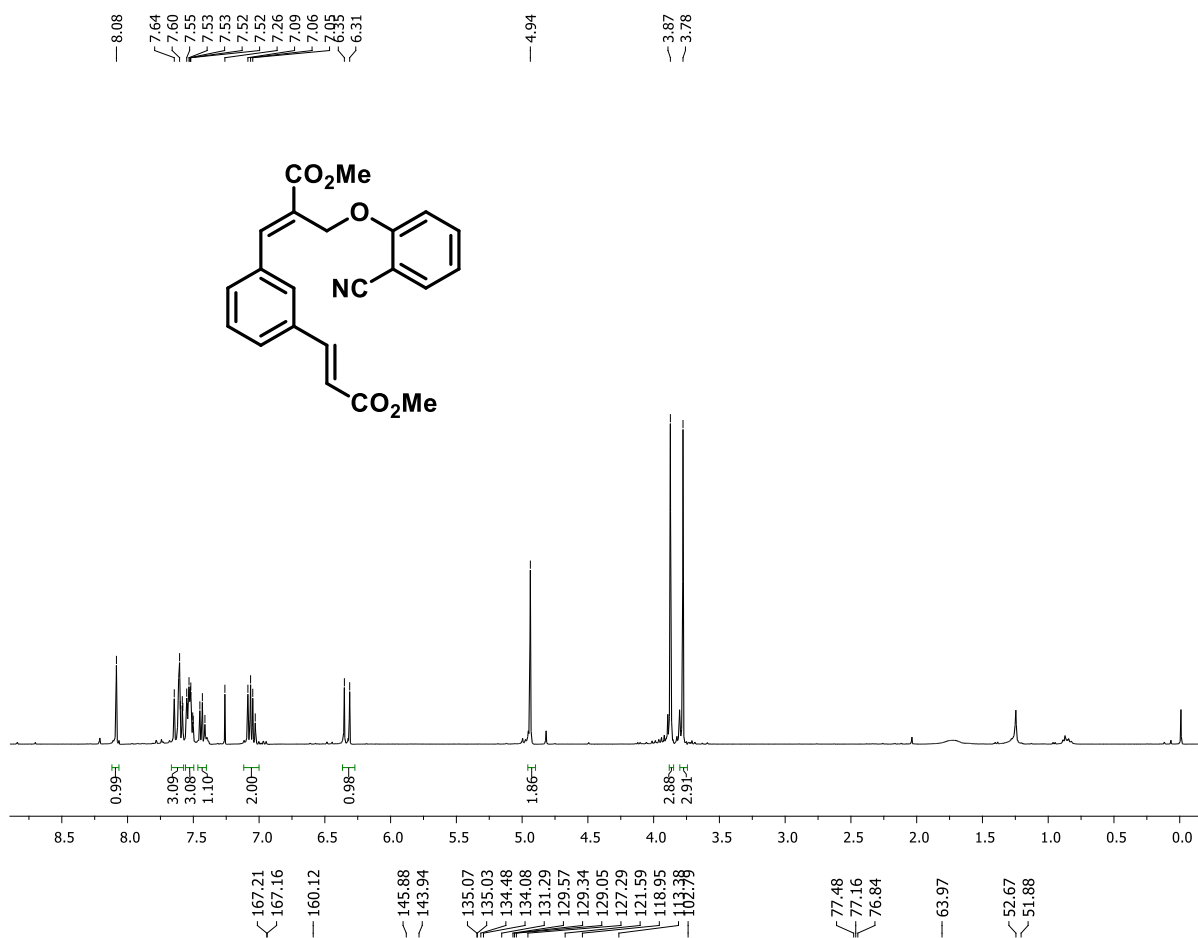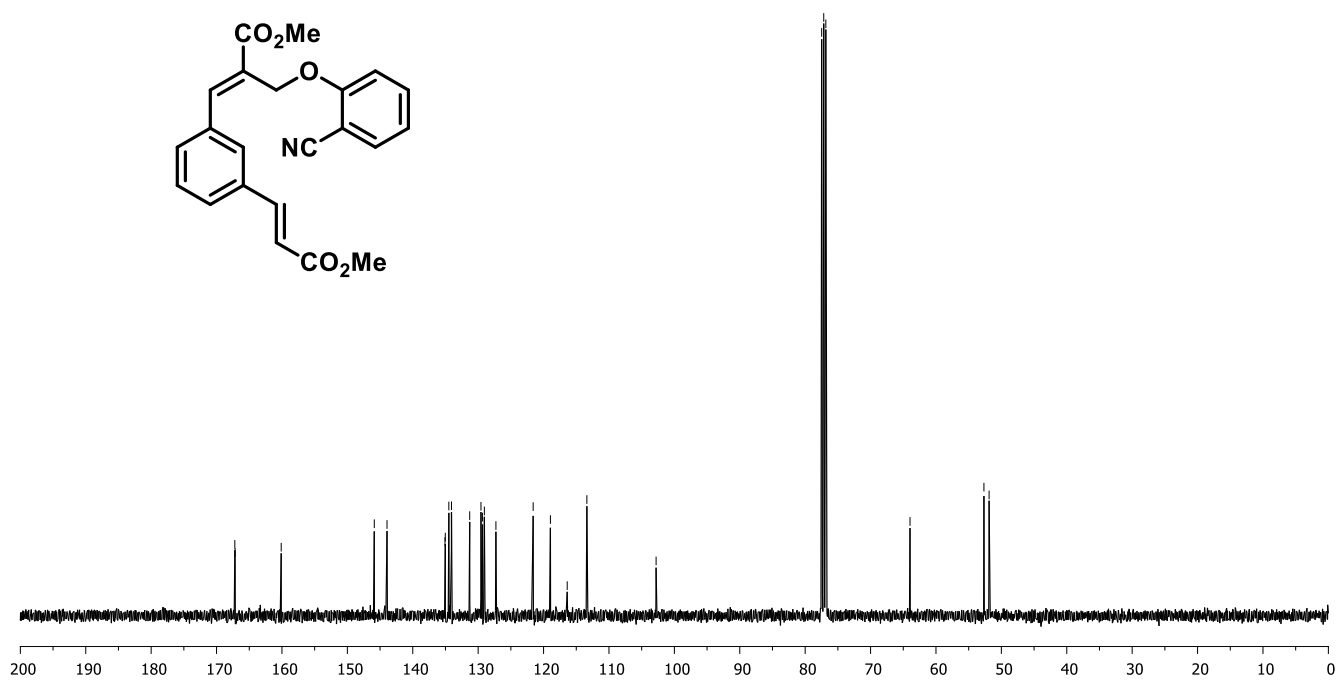

Methyl (*E*)-3-(3-((*E*)-3-butoxy-3-oxoprop-1-en-1-yl)phenyl)-2-((2 cyanophenoxy)methyl) acrylate (3c)

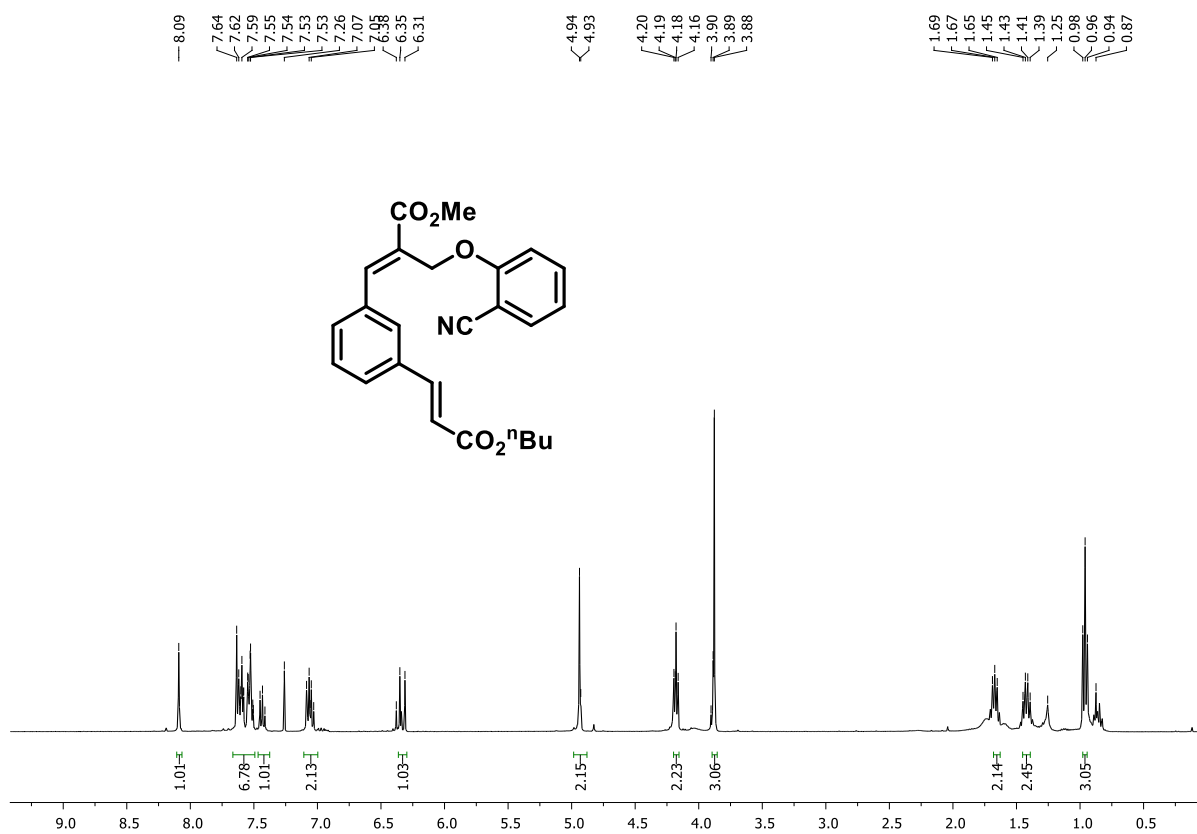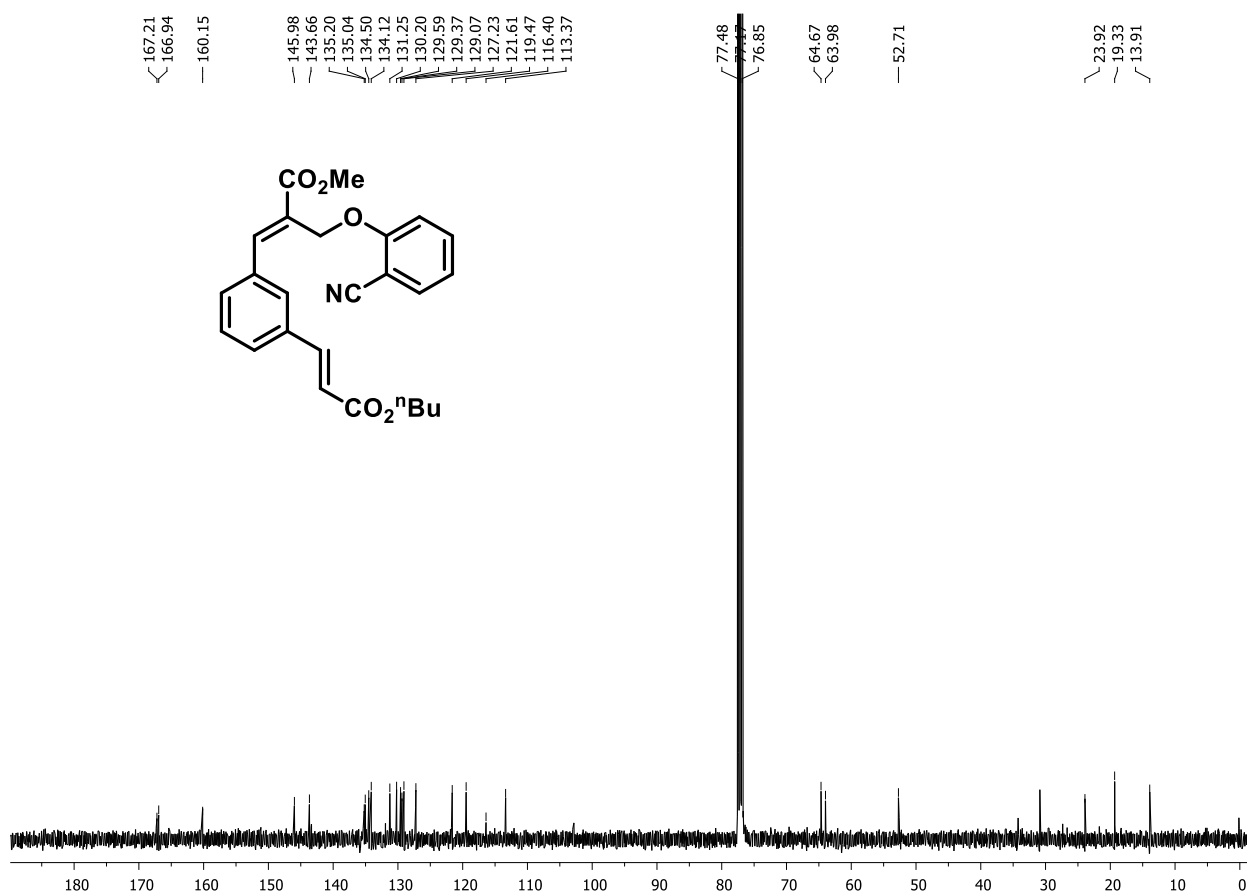

**Methyl (*E*)-3-(3-((*E*)-3-(*tert*-butoxy)-3-oxoprop-1-en-1-yl) phenyl)-2-((2-cyanophenoxy) methyl) acrylate (3d)**

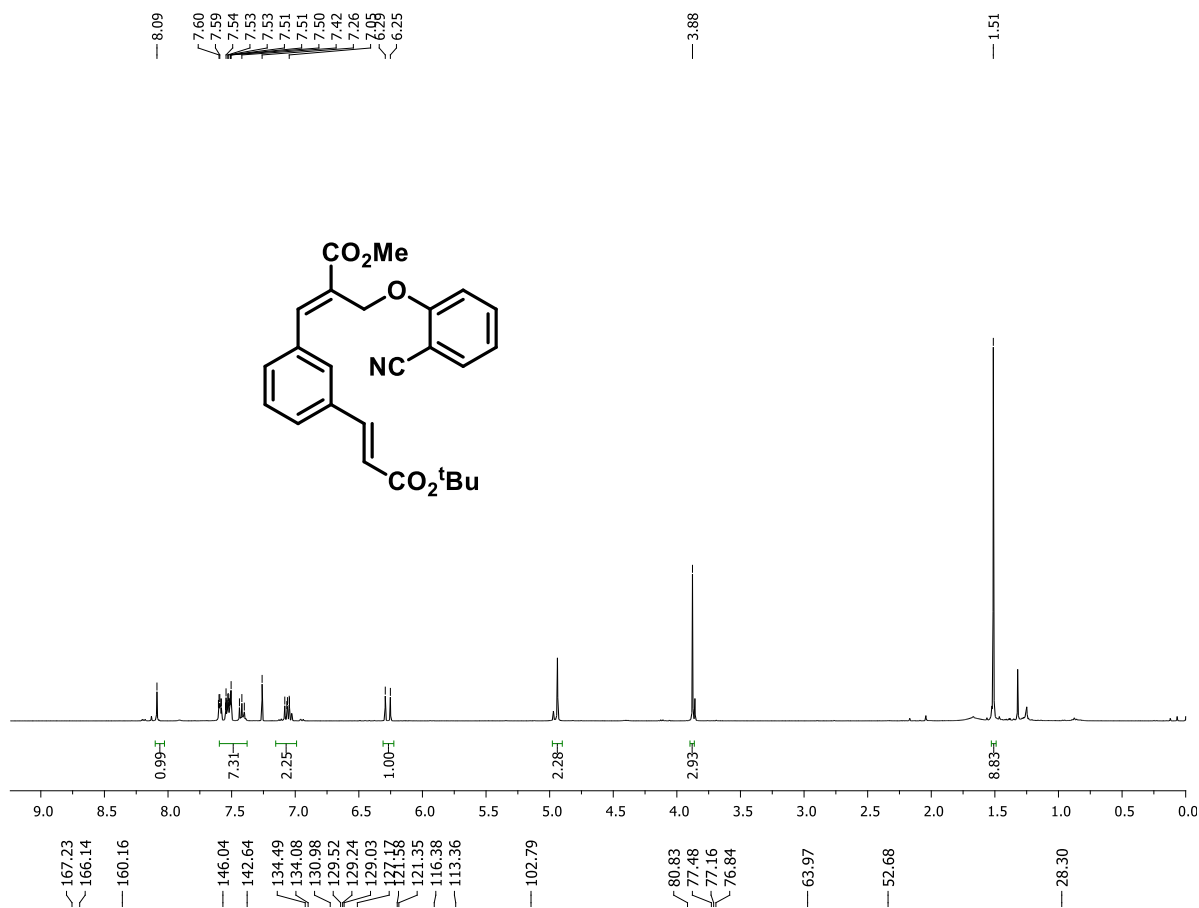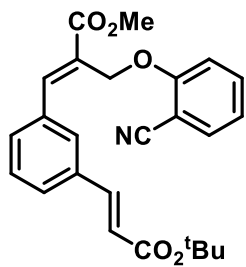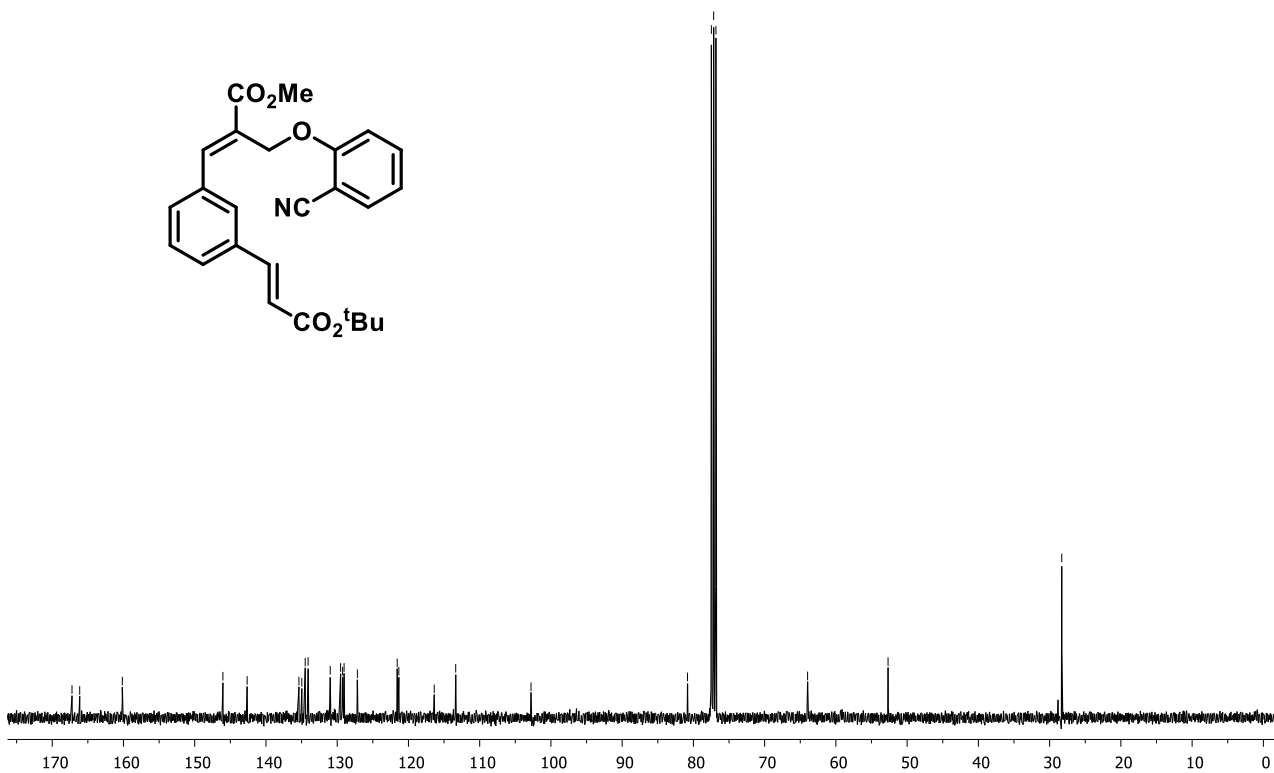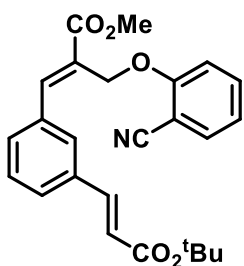

**Methyl (E)-2-((2-cyanophenoxy)methyl)-3-(3-((E)-3-oxo-3-(((1R,2R,4R)-1,7,7-trimethylbicyclo[2.2.1]heptan-2-yl)oxy)prop-1-en-1-yl)phenyl)acrylate (3e)**

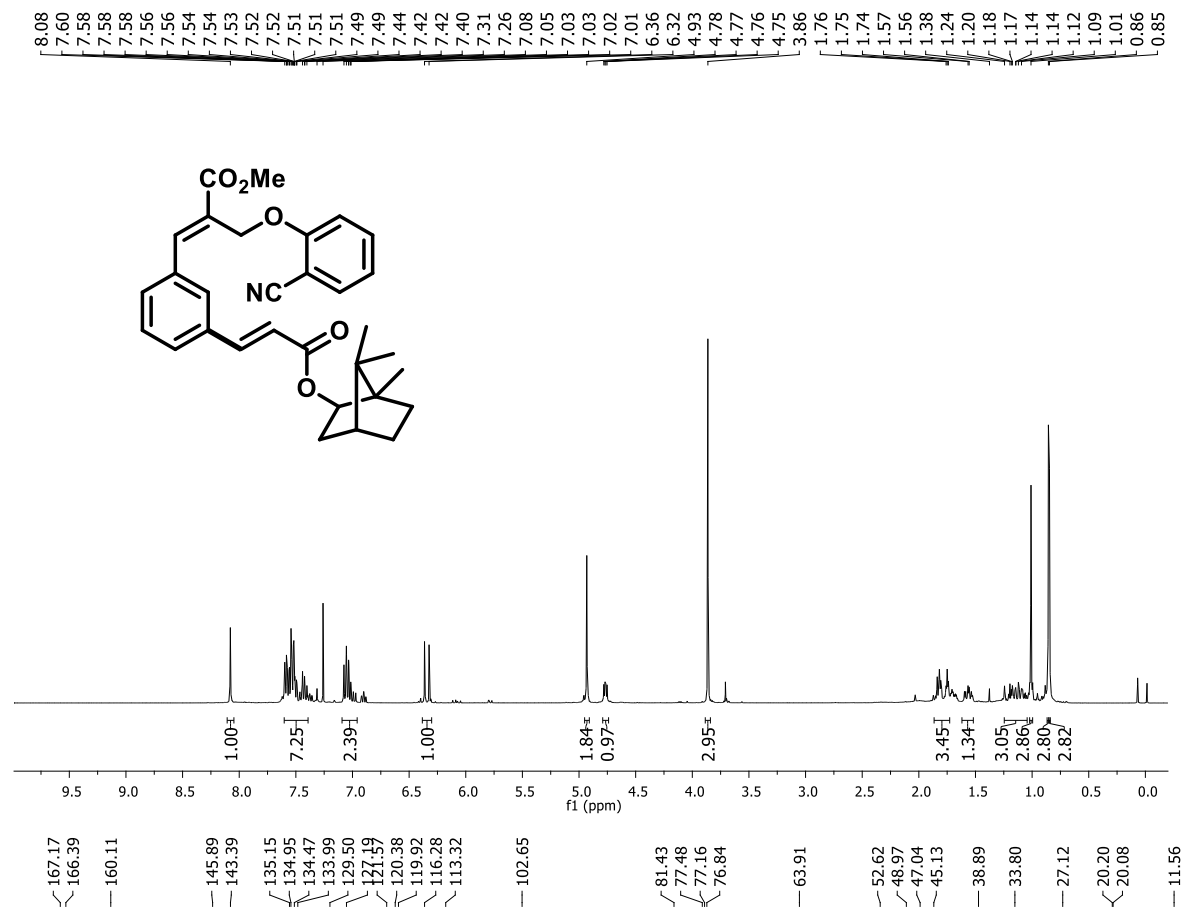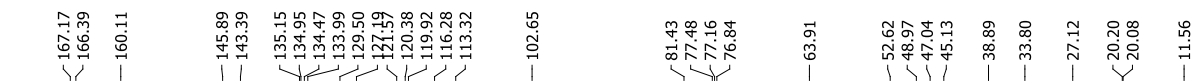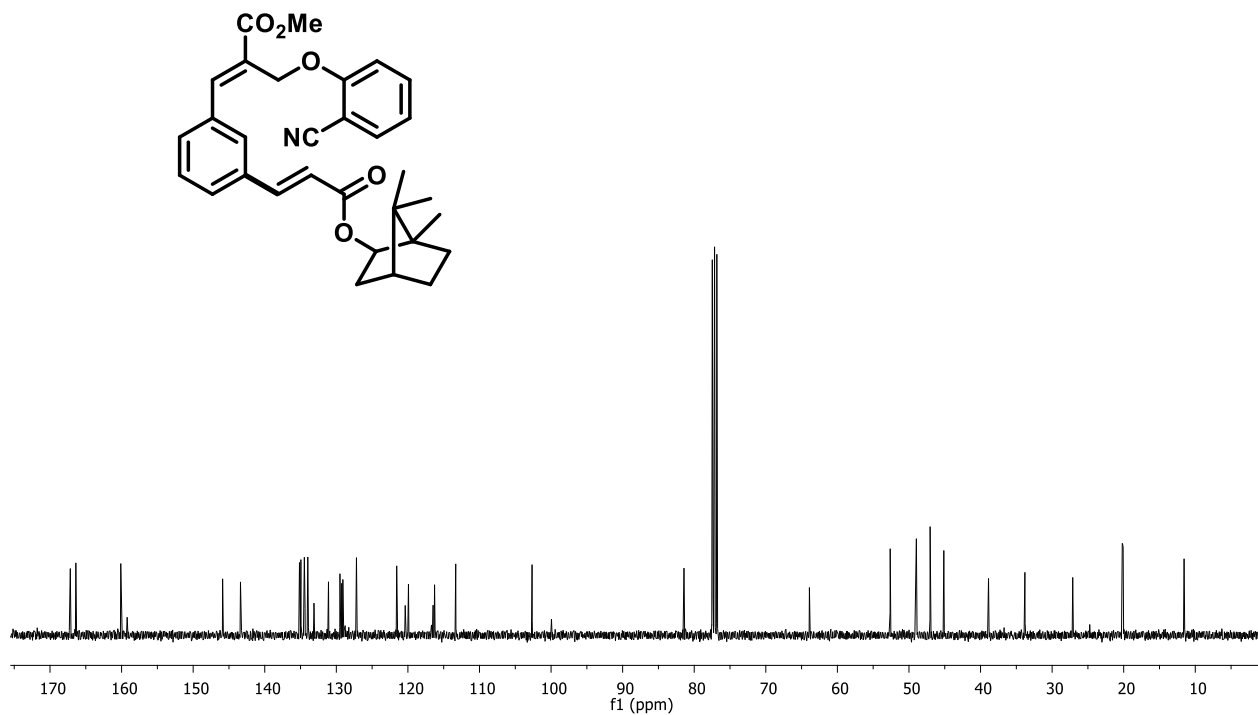



Methyl (*E*)-2-((2-cyanophenoxy) methyl)-3-(3-((*E*)-3-oxo-3-phenoxyprop-1-en-1-yl)phenyl) acrylate (**3f**)

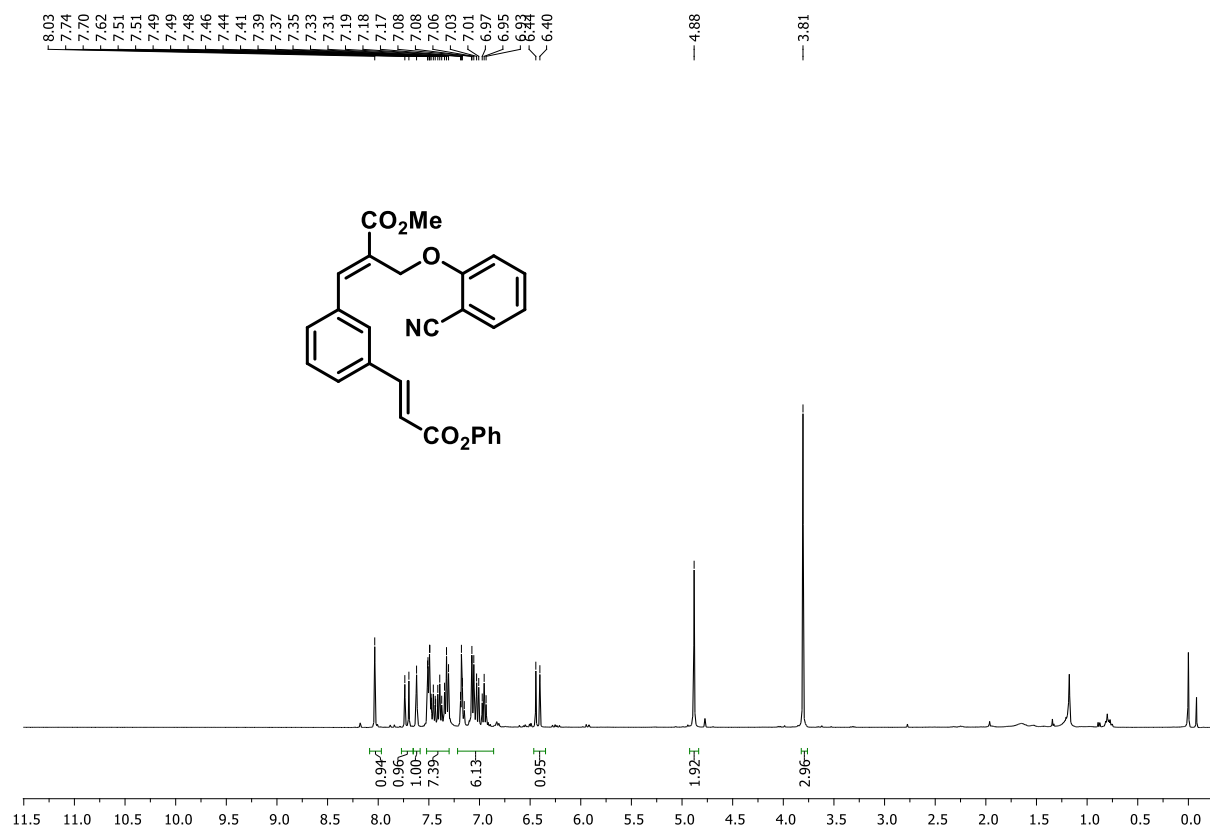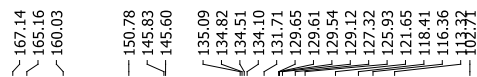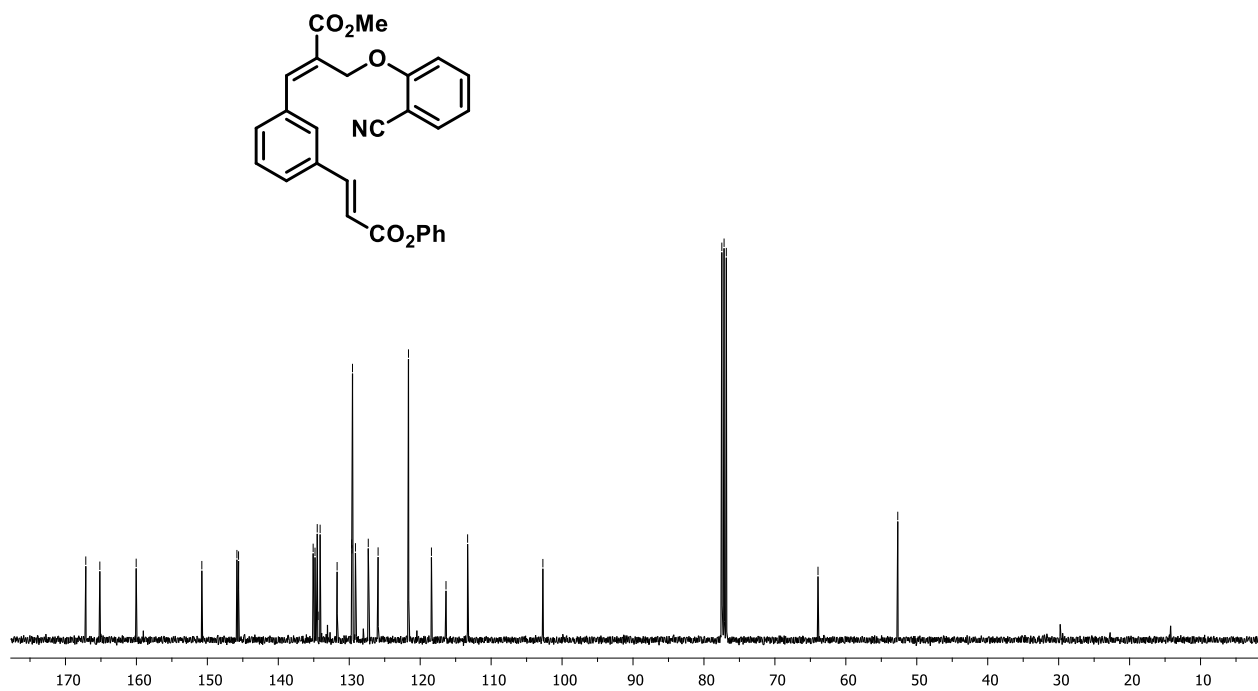

Methyl (*E*)-3-(3-((*E*)-3-(benzyloxy)-3-oxoprop-1-en-1-yl) phenyl)-2- ((2-cyanophenoxy) methyl) acrylate  
(3g)

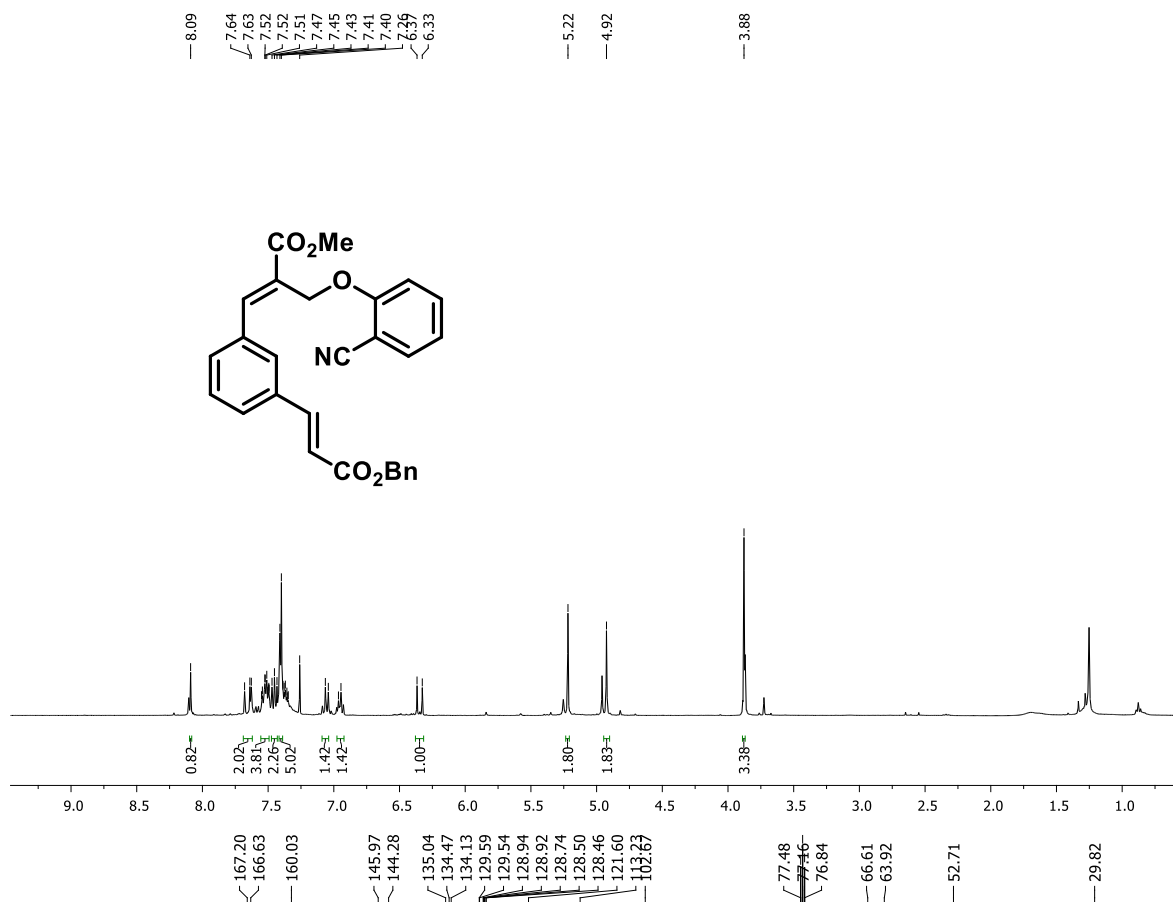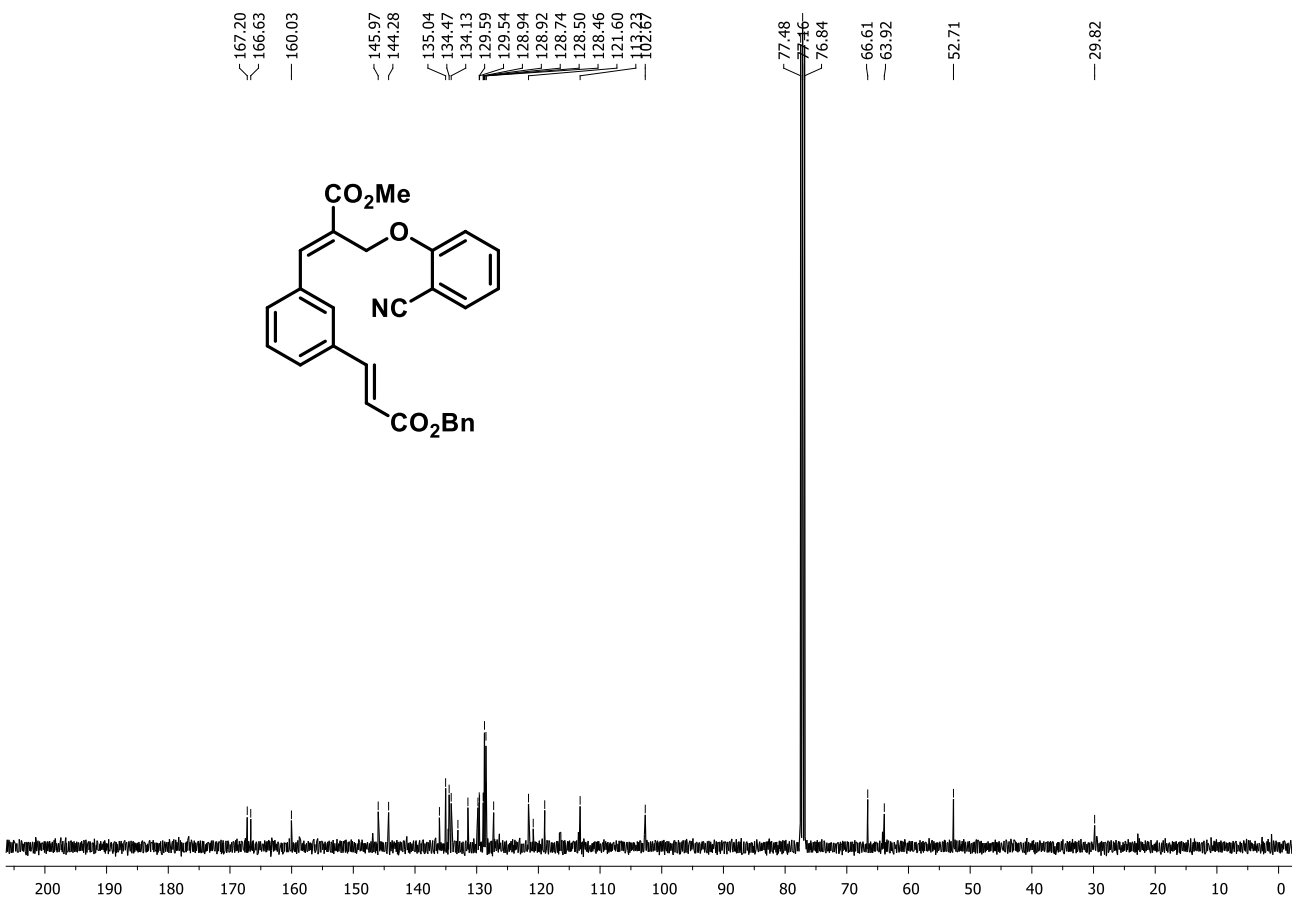

**Methyl (E)-2-((2-cyanophenoxy)methyl)-3-(3-((E)-3-oxo-3-((tetrahydrofuran-2-yl)methoxy)prop-1-en-1-yl)phenyl)acrylate (3h)**

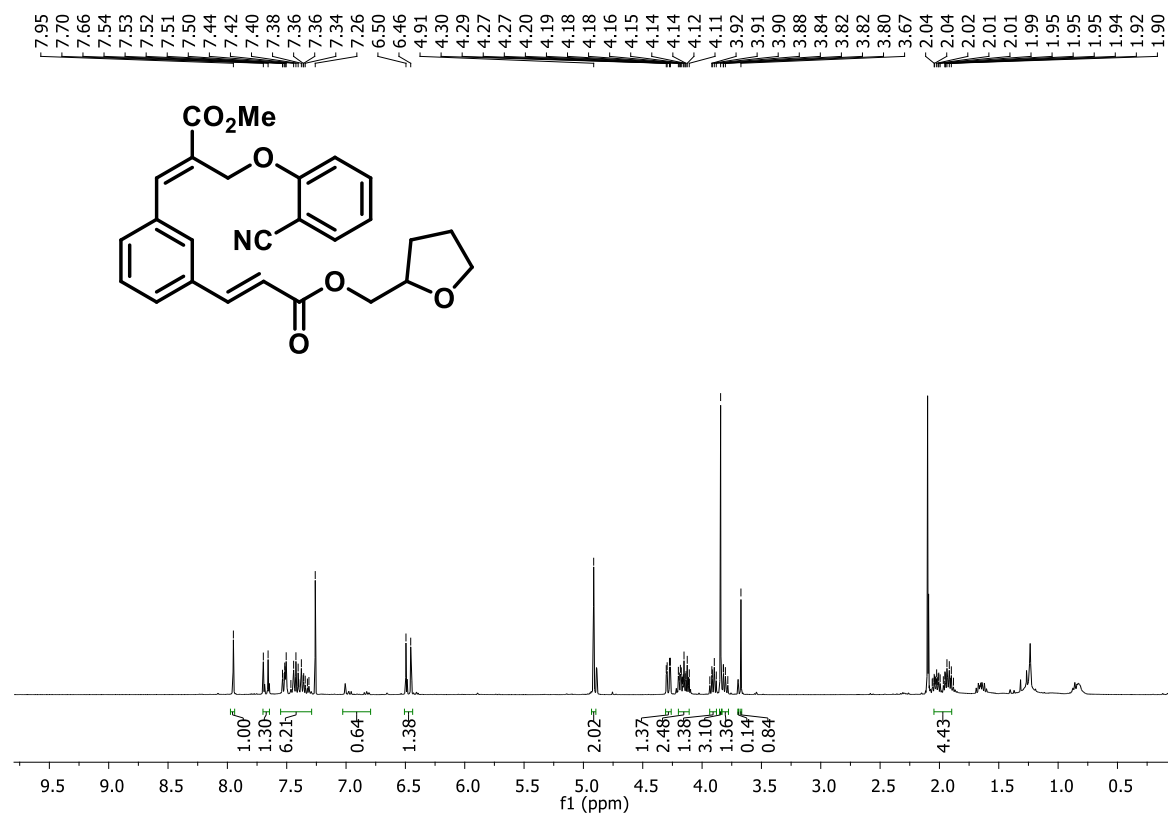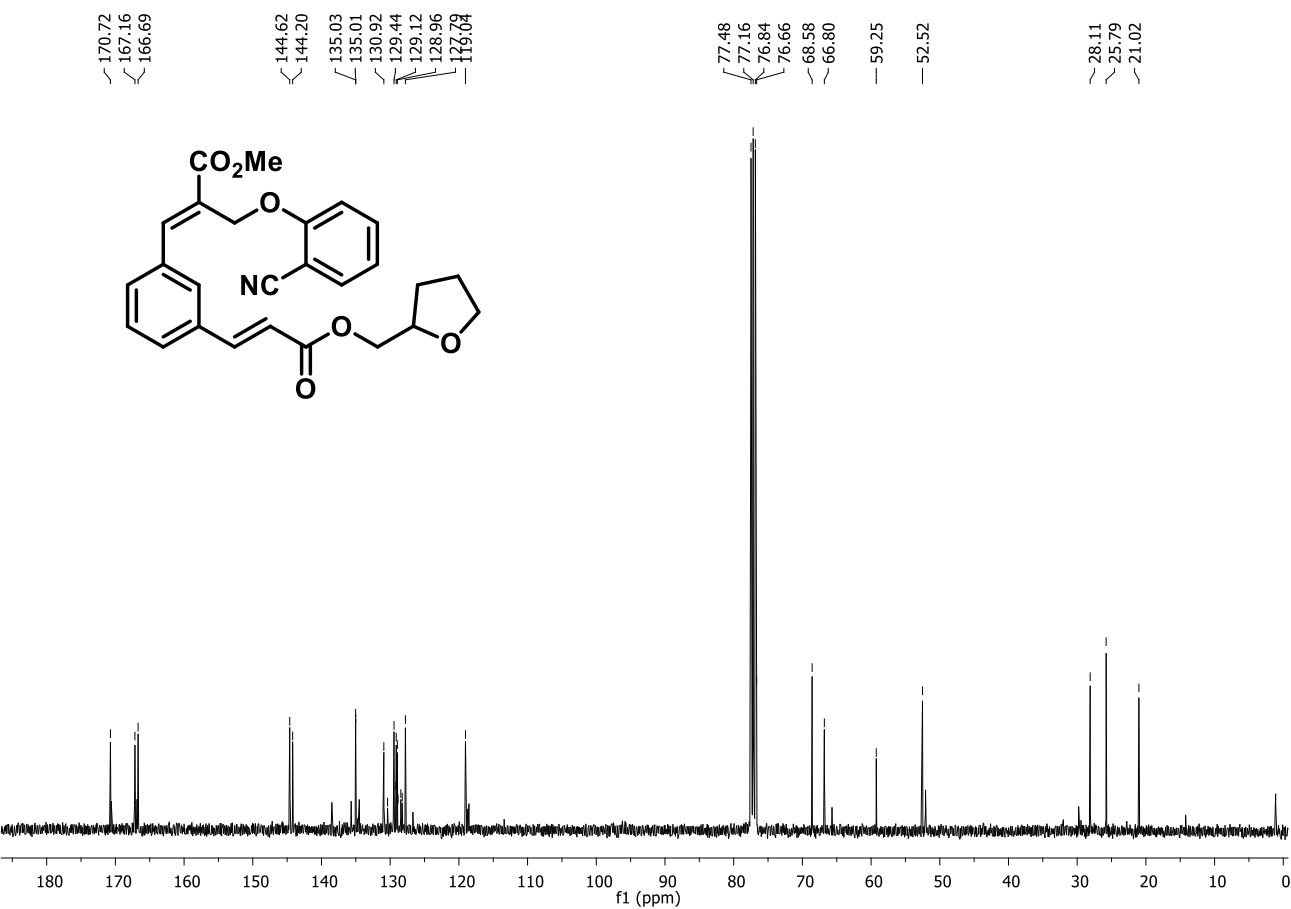

Methyl (*E*)-2-((2-cyanophenoxy) methyl)-3-((*E*)-3-((2-ethylhexyl)oxy)-3-oxoprop-1-en-1-yl) phenyl acrylate (**3i**)

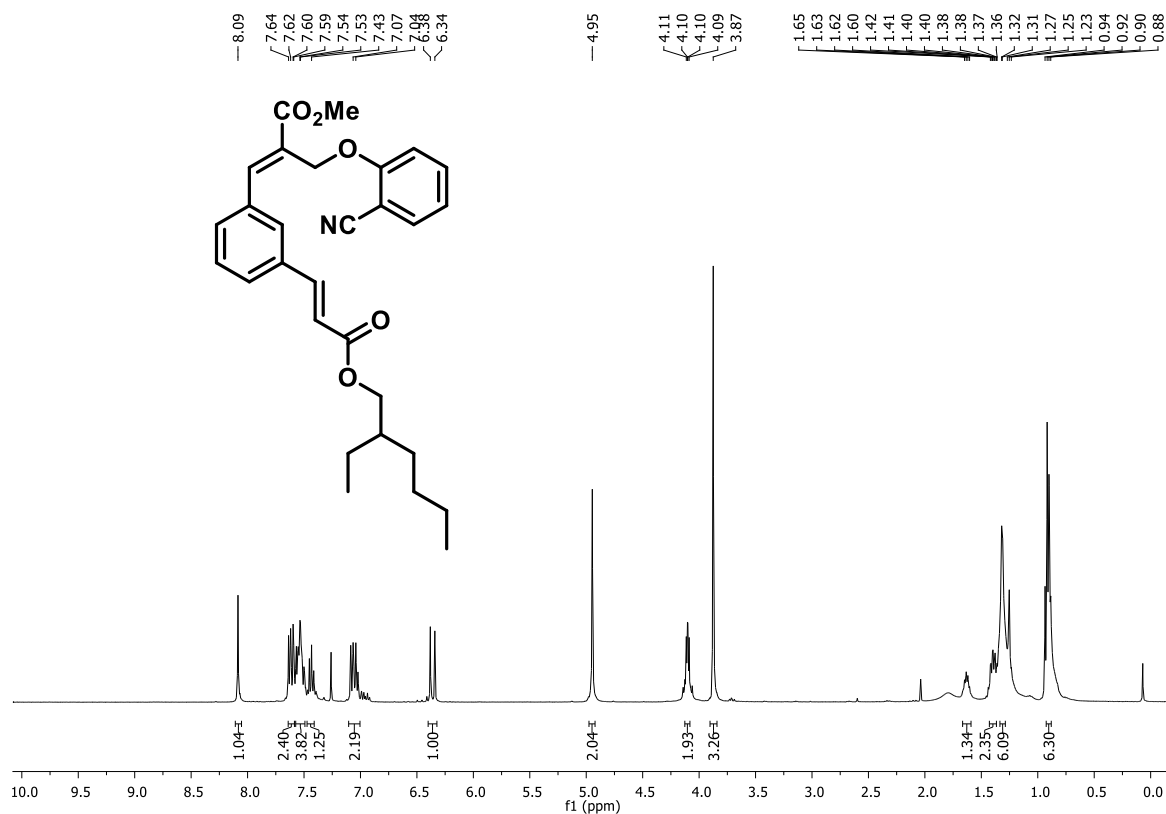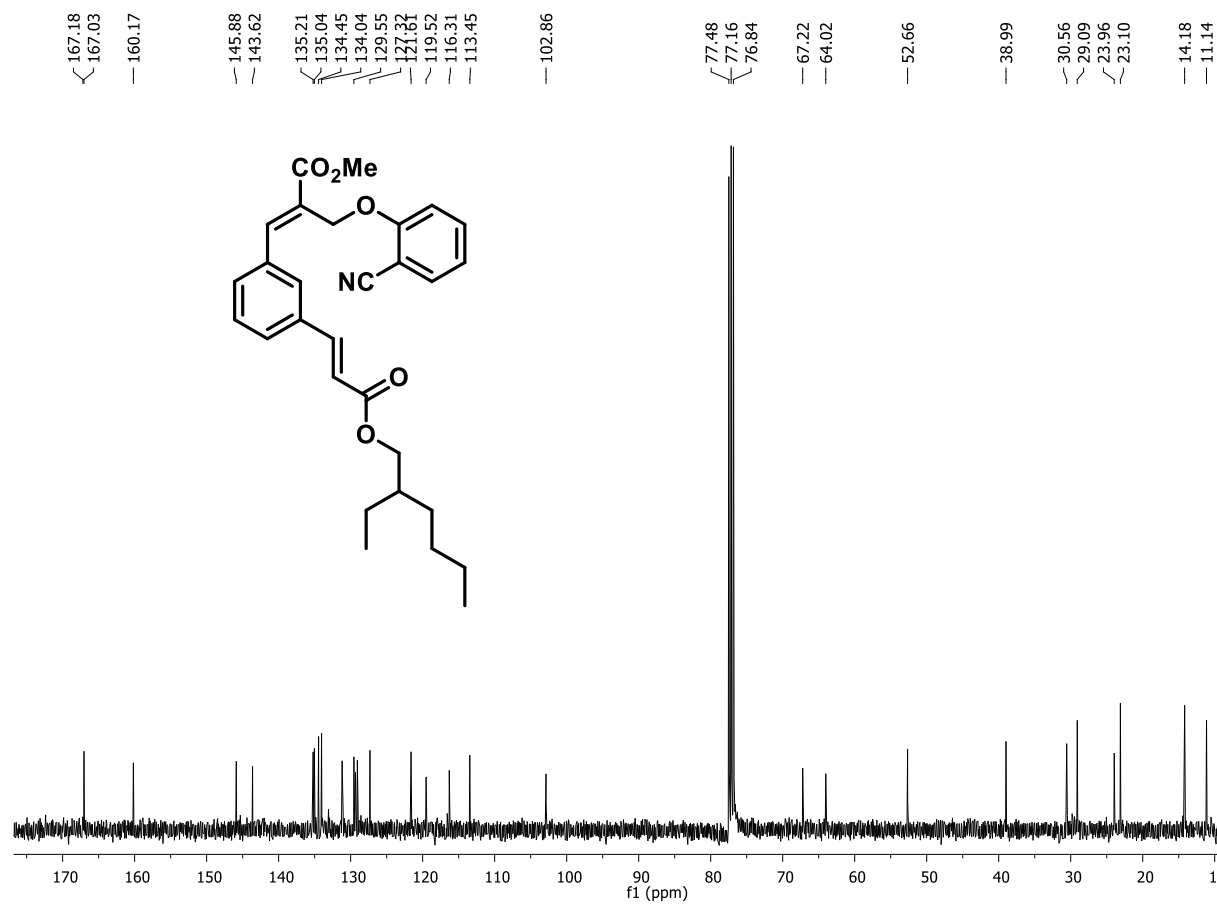

Methyl (E)-3-(3-((E)-3-(3-(acryloyloxy) phenoxy)-3-oxoprop-1-en-1-yl) phenyl)-2-((2-cyanophenoxy) methyl) acrylate (3j)

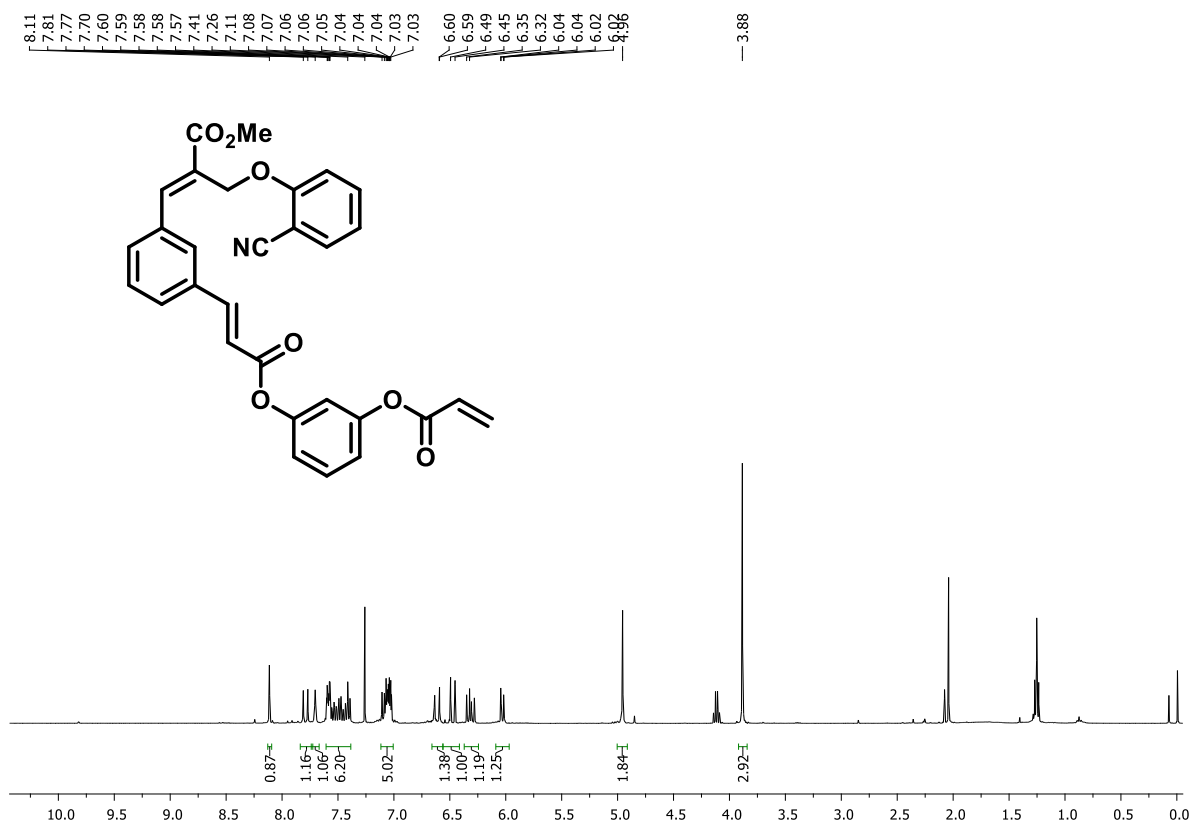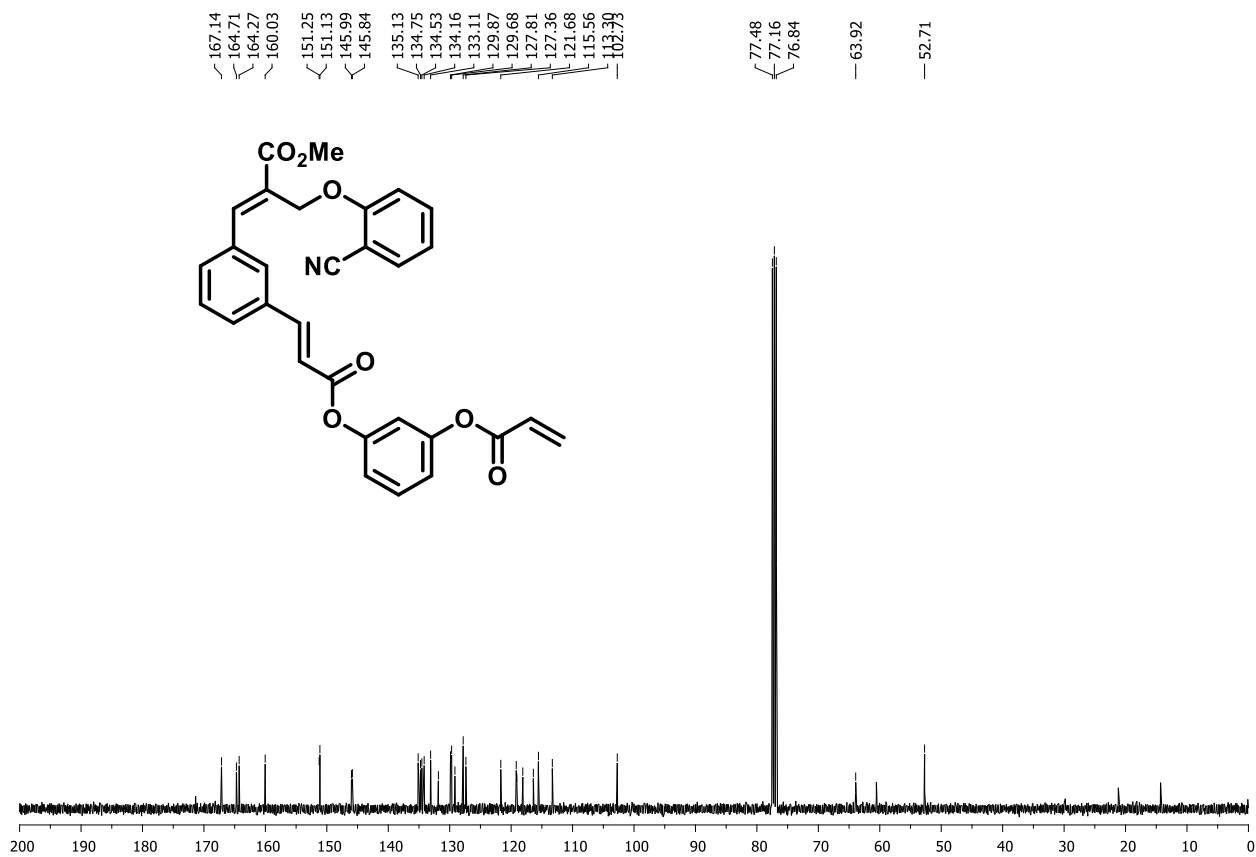

Dimethyl 2-(3-((*E*)-2-((2-cyanophenoxy) methyl)-3-methoxy-3-oxoprop-1-en-1-yl)phenyl) maleate (3k)

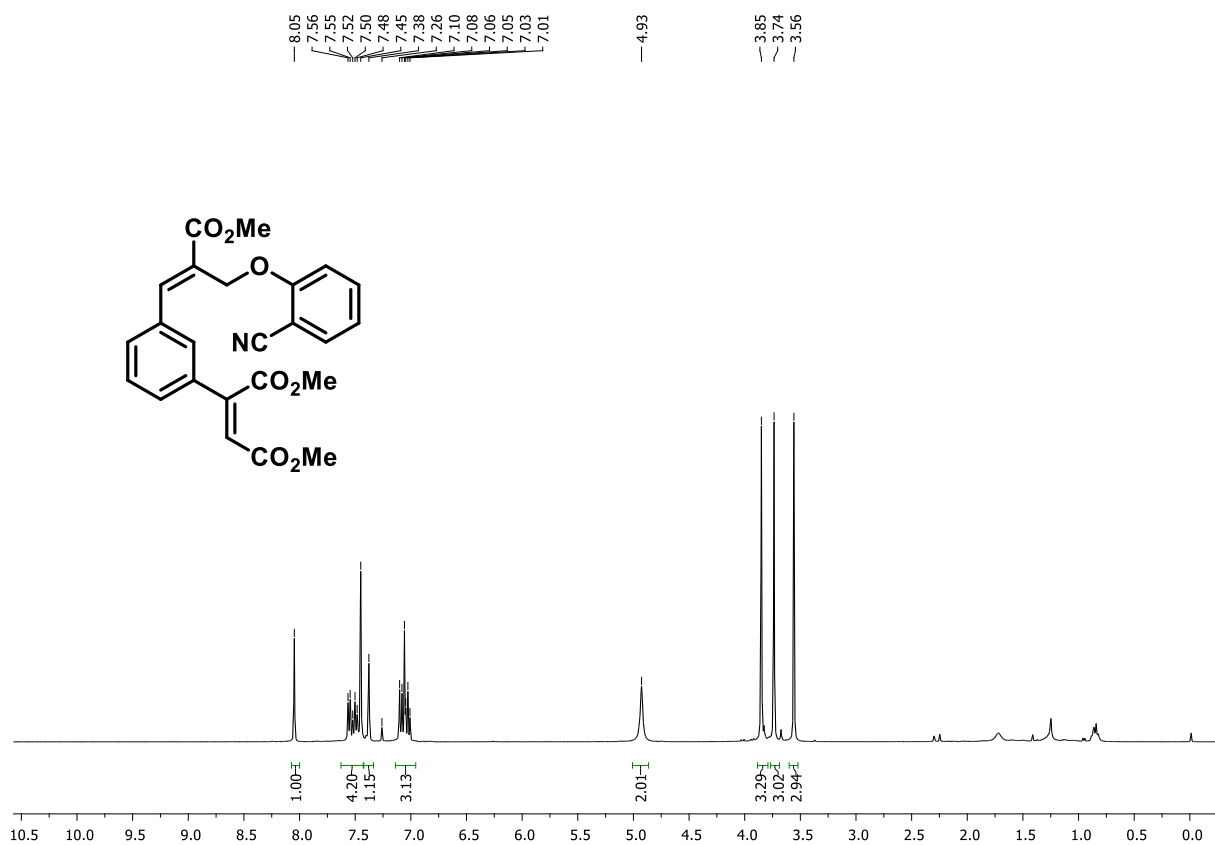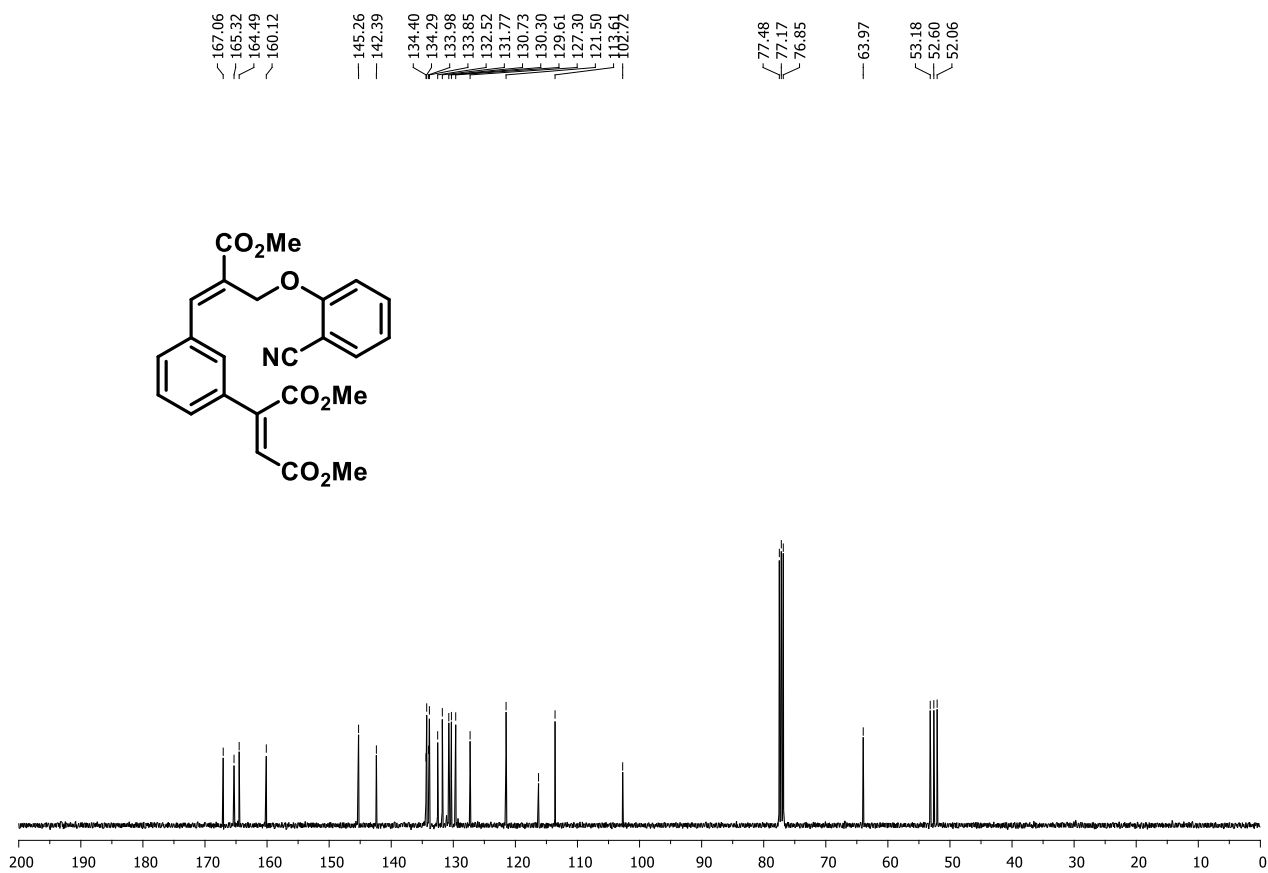

Diethyl 2-(3-((E)-2-((2-cyanophenoxy)methyl)-3-methoxy-3-oxoprop-1-en-1-yl)phenyl) maleate (3l)

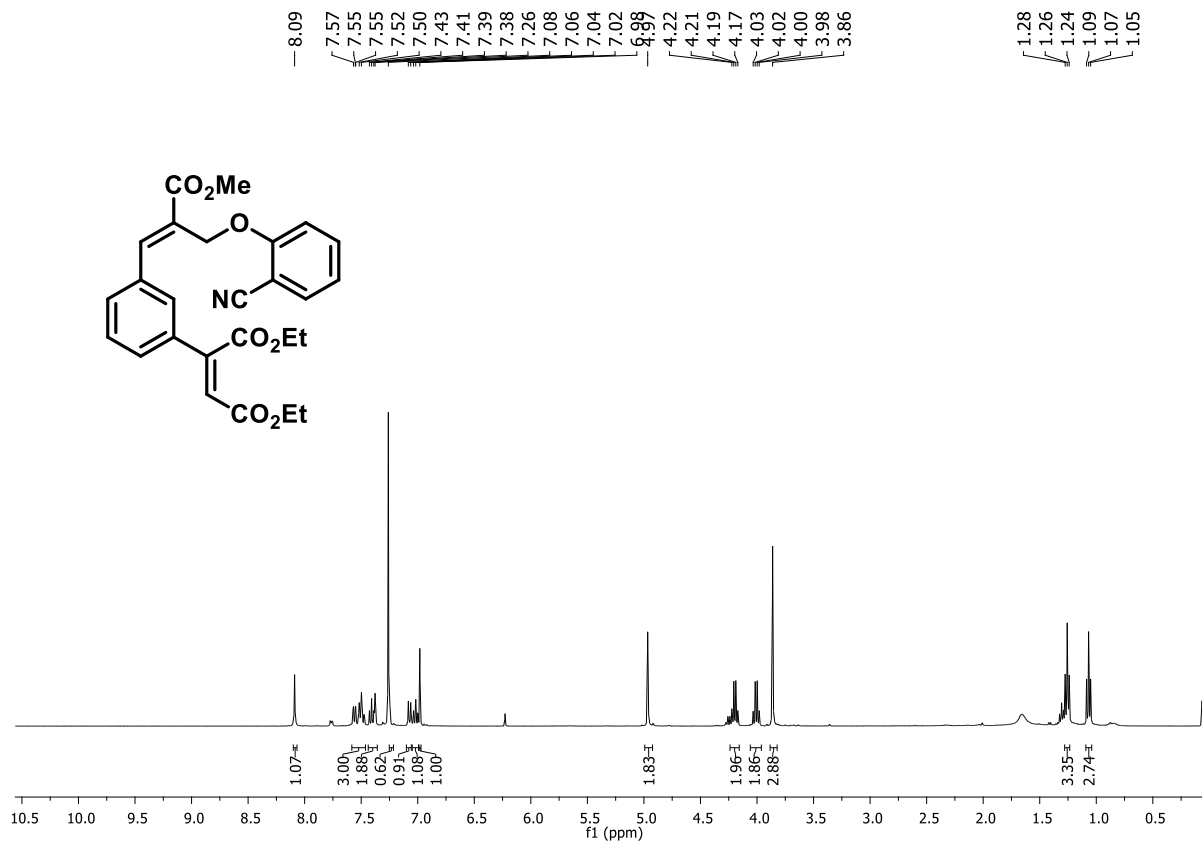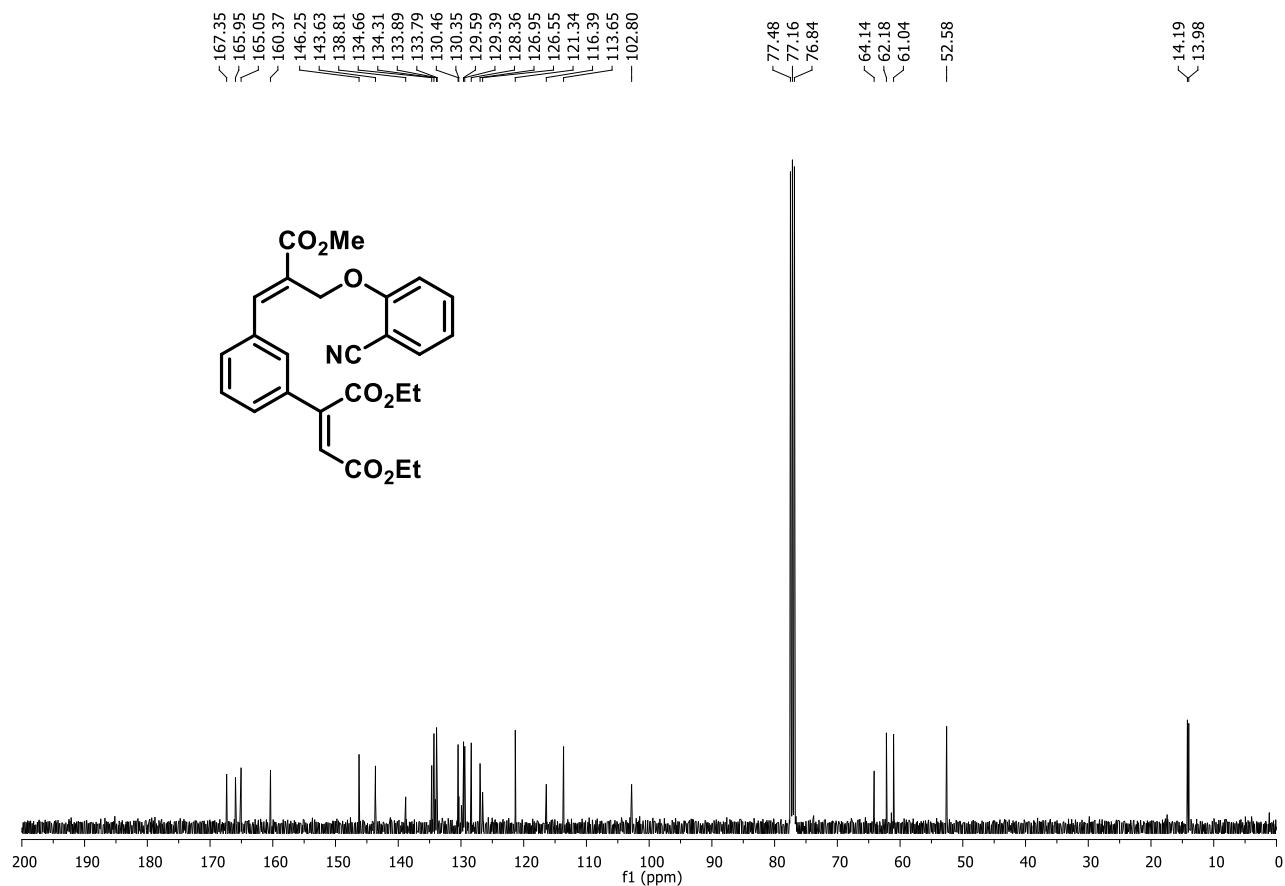

Dibutyl 2-(3-((*E*)-2-((2-cyanophenoxy) methyl)-3-methoxy-3-oxoprop-1-en-1-yl)phenyl) maleate (3m)

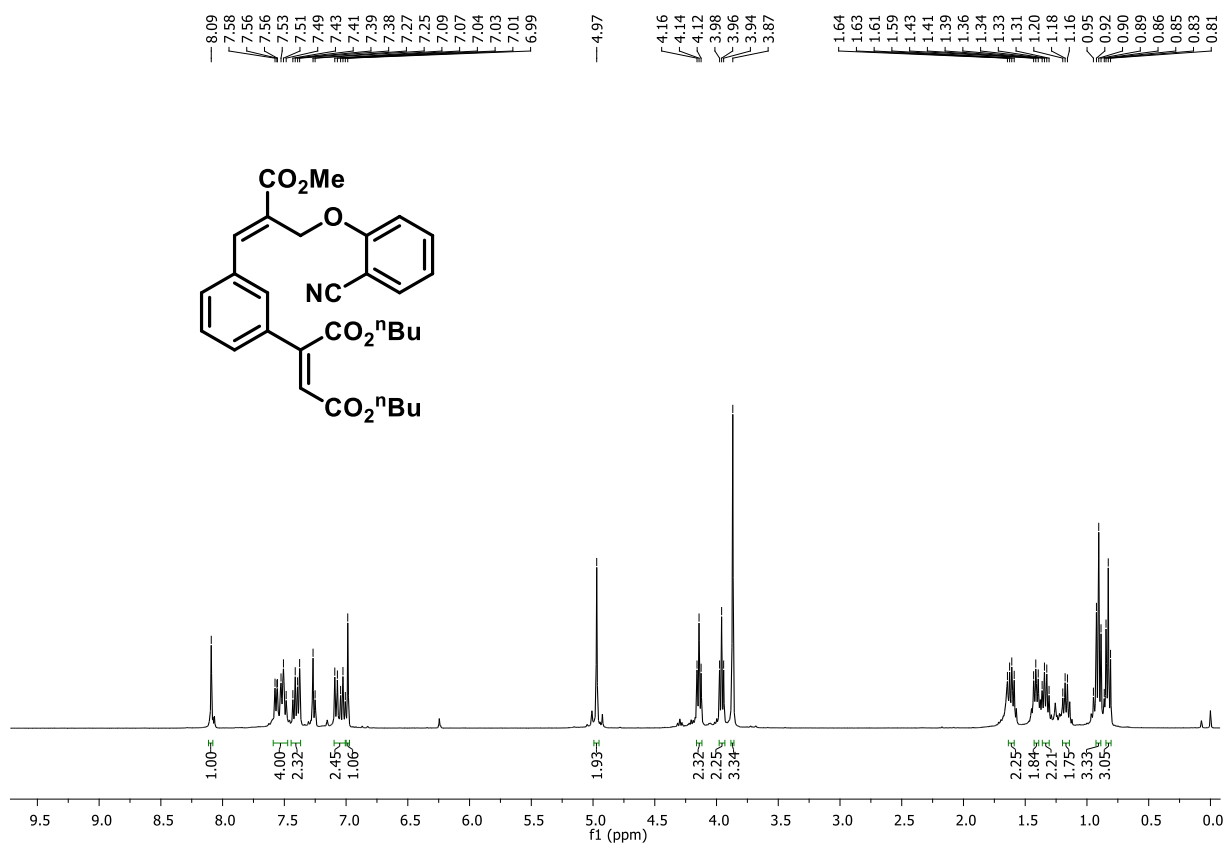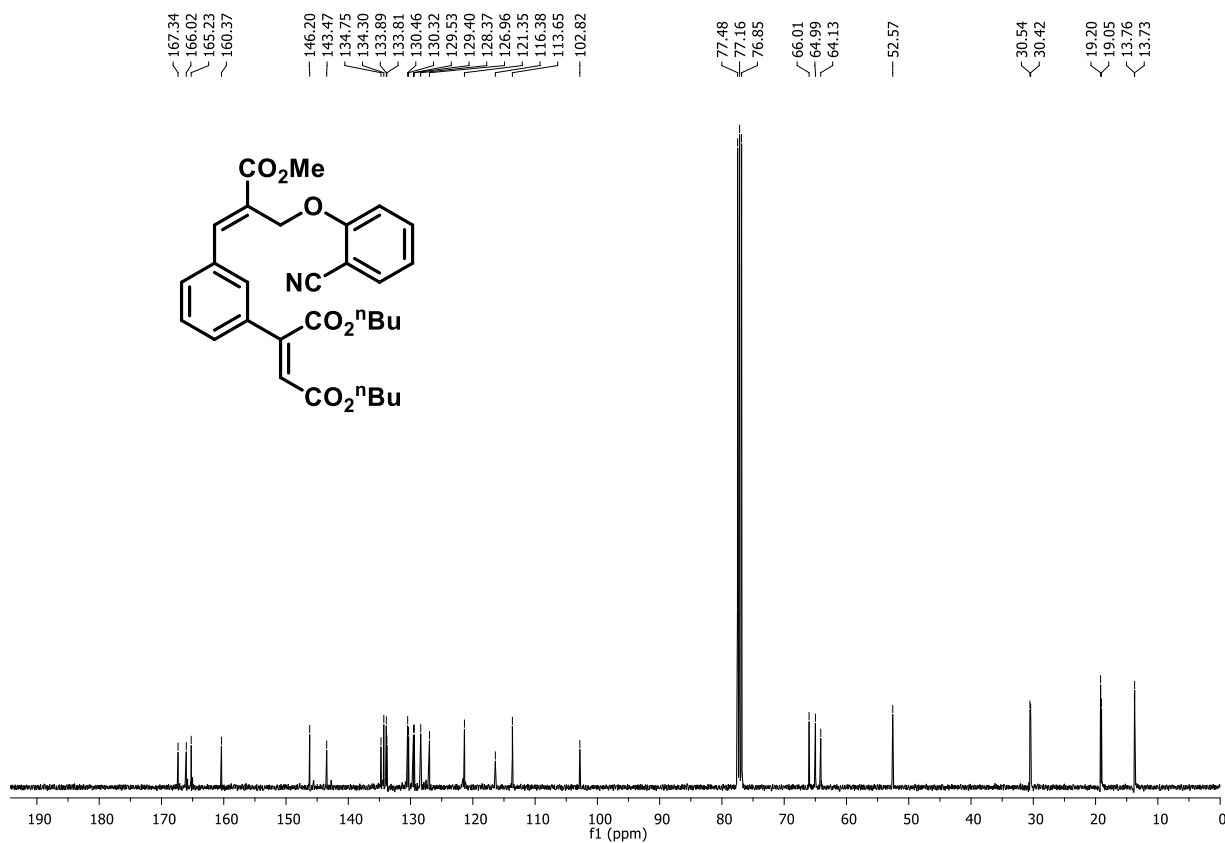



Methyl (*E*)-2-((2-cyanophenoxy) methyl)-3-(3-((*E*)-3-oxo-1-phenylprop-1-en-1-yl) phenyl) acrylate (3n)

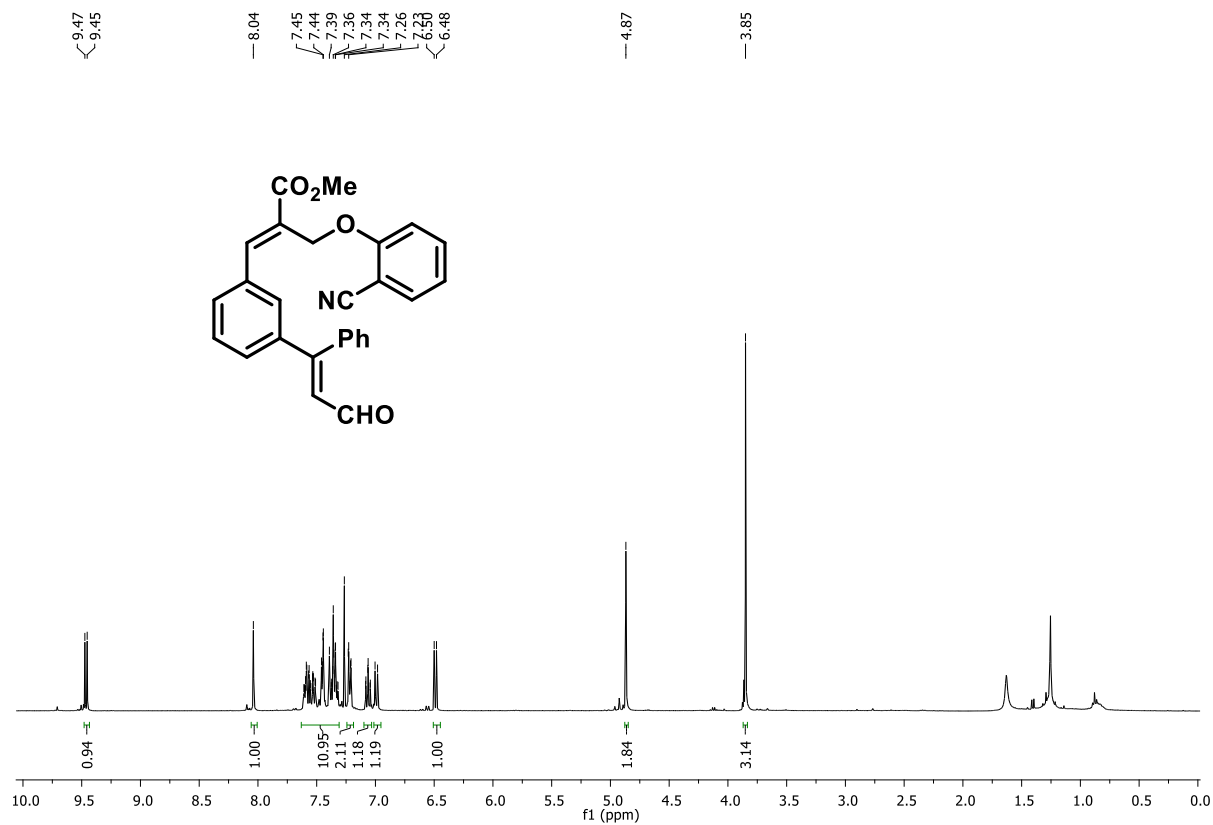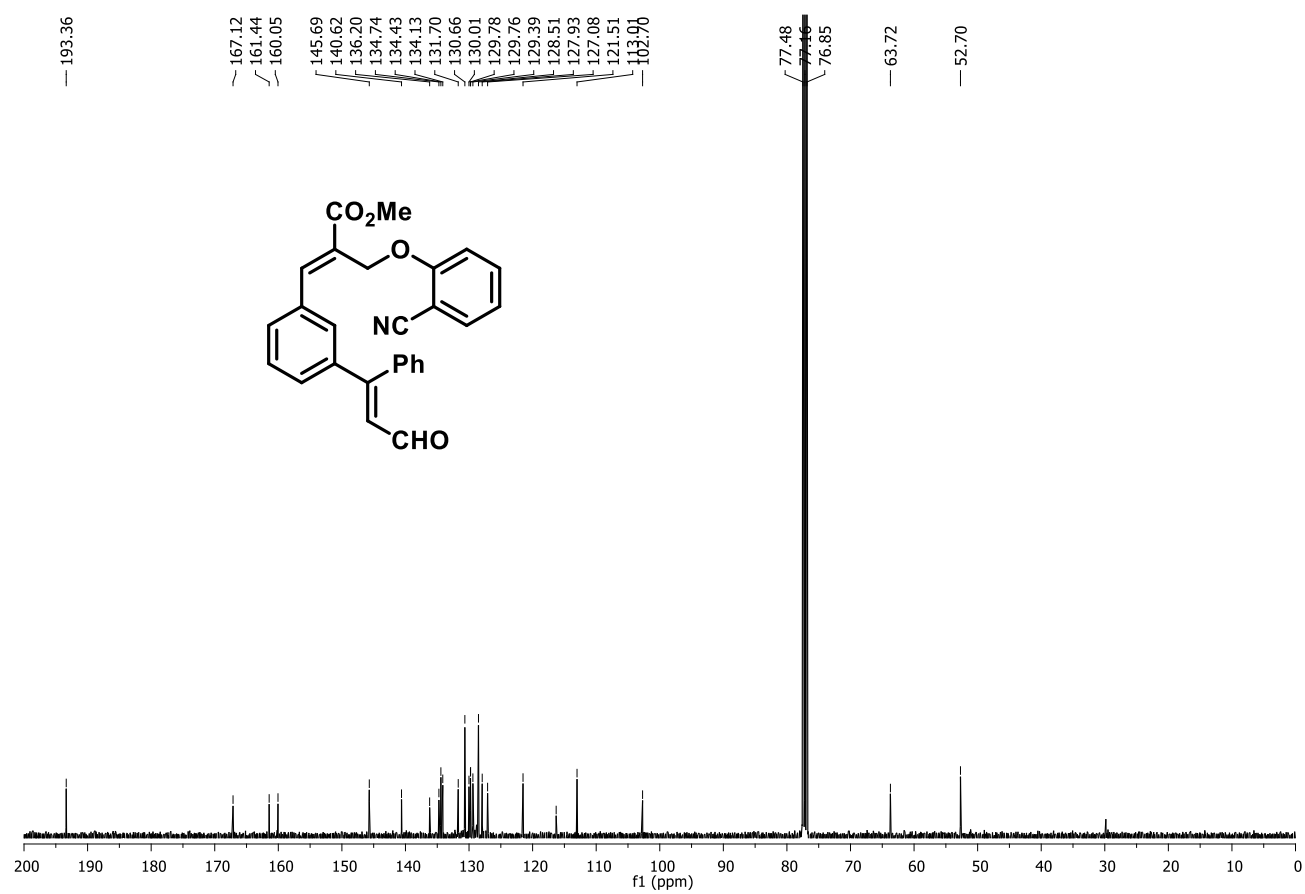

**Methyl (E)-2-((2-cyanophenoxy) methyl)-3-(3-((E)-3-methoxy-3-oxo-1-phenylprop-1-en-1-yl) phenyl) acrylate (3o)**

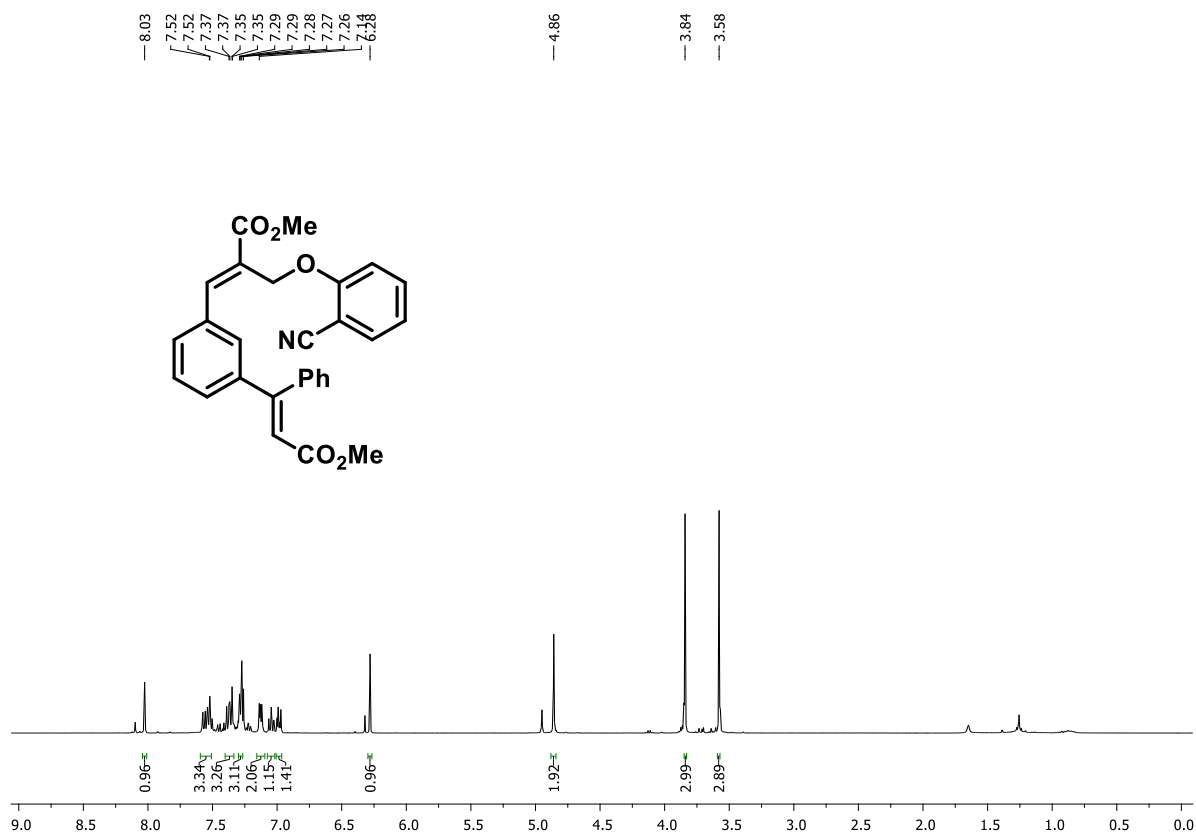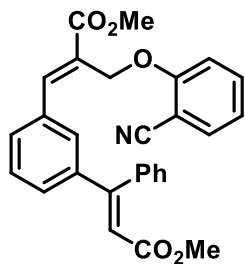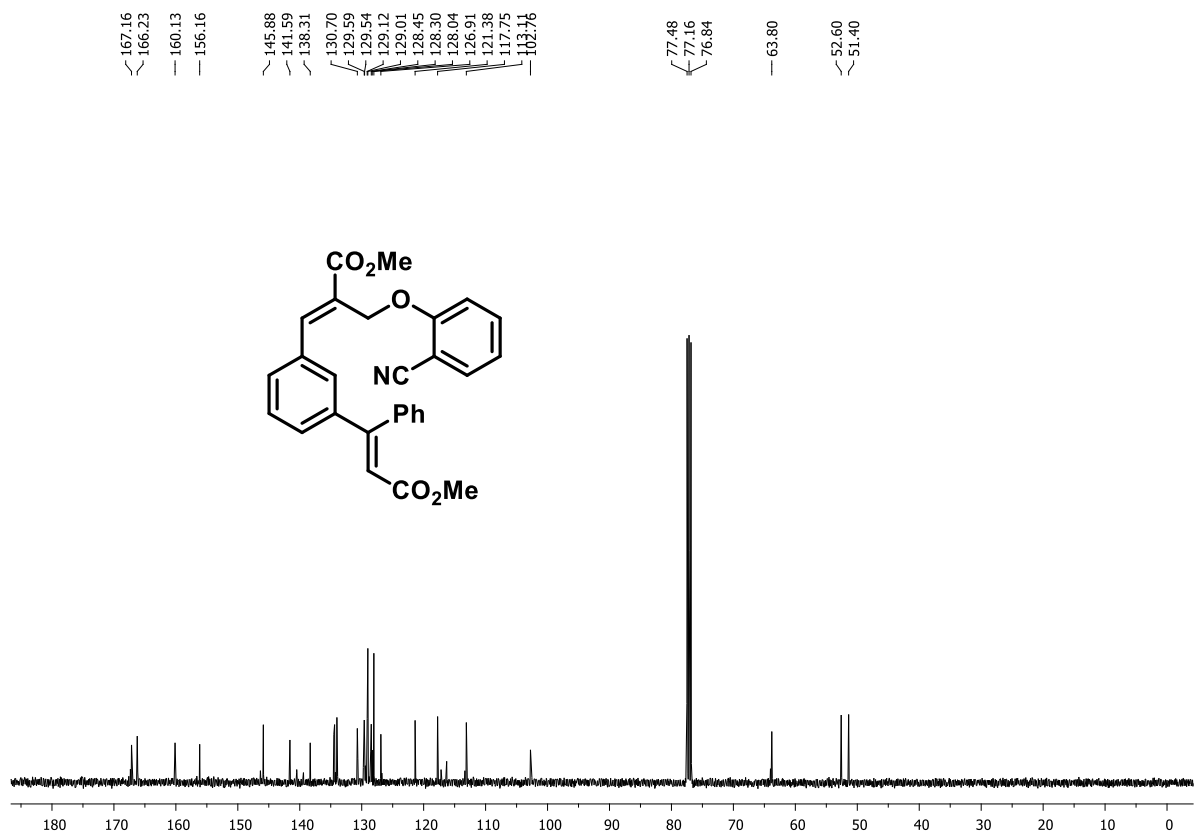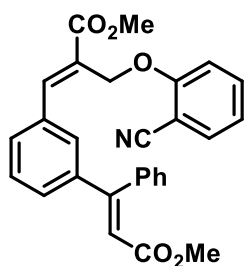

Methyl (*E*)-2-((2-cyanophenoxy)methyl)-3-(3-((*E*)-3-oxo-1-phenylbut-1-en-1-yl) phenyl) acrylate (3p)

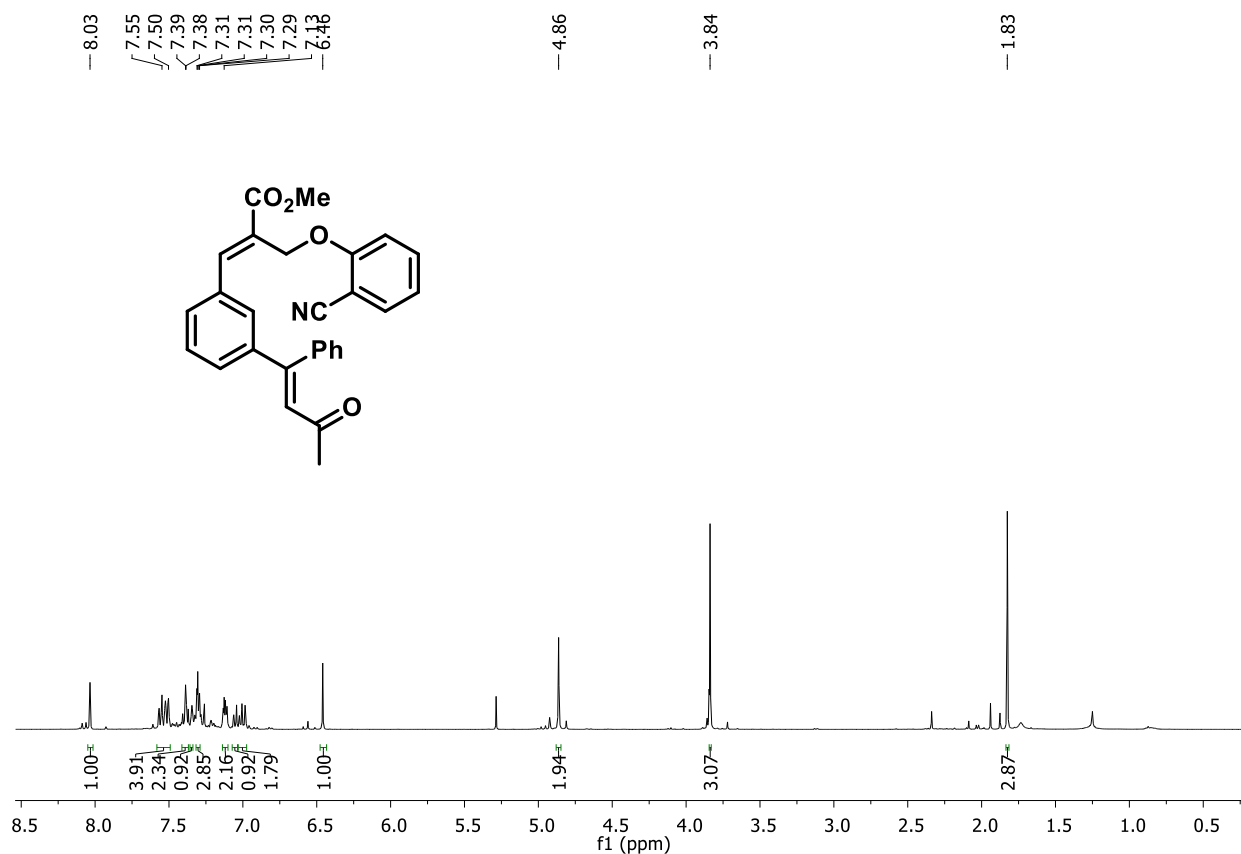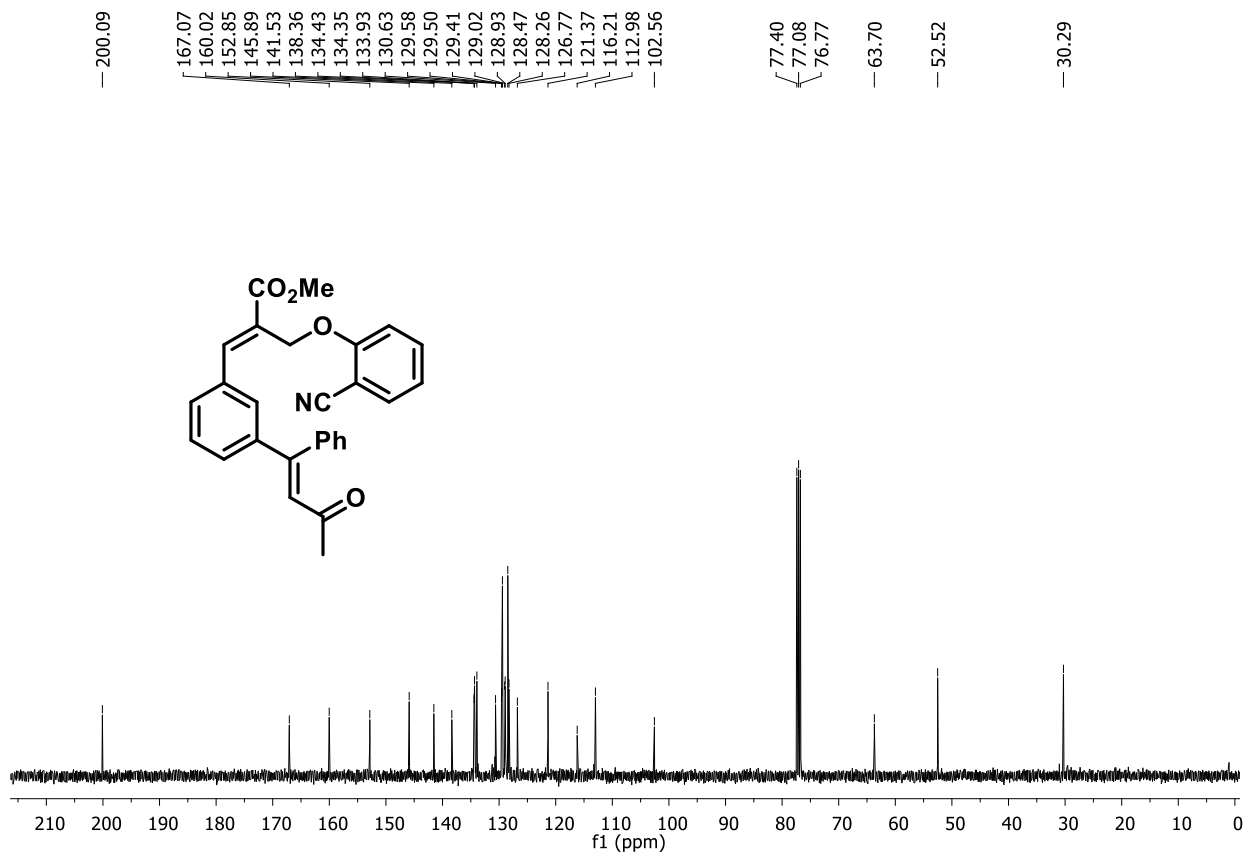

Methyl (*E*)-2-((2-cyanophenoxy) methyl)-3-(3-((*E*)-3-methoxy-3-oxoprop-1-en-1-yl)phenyl) acrylate (3q)

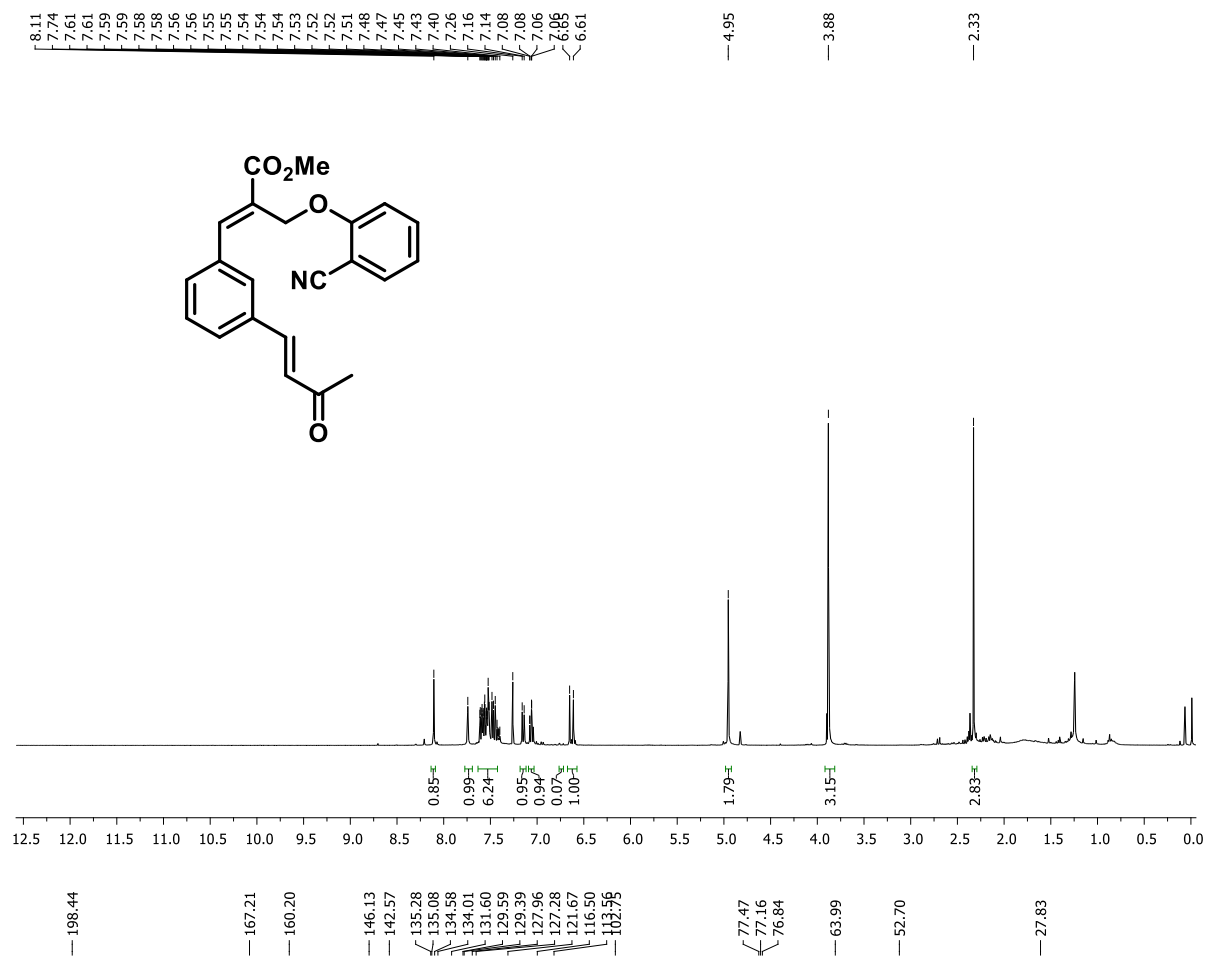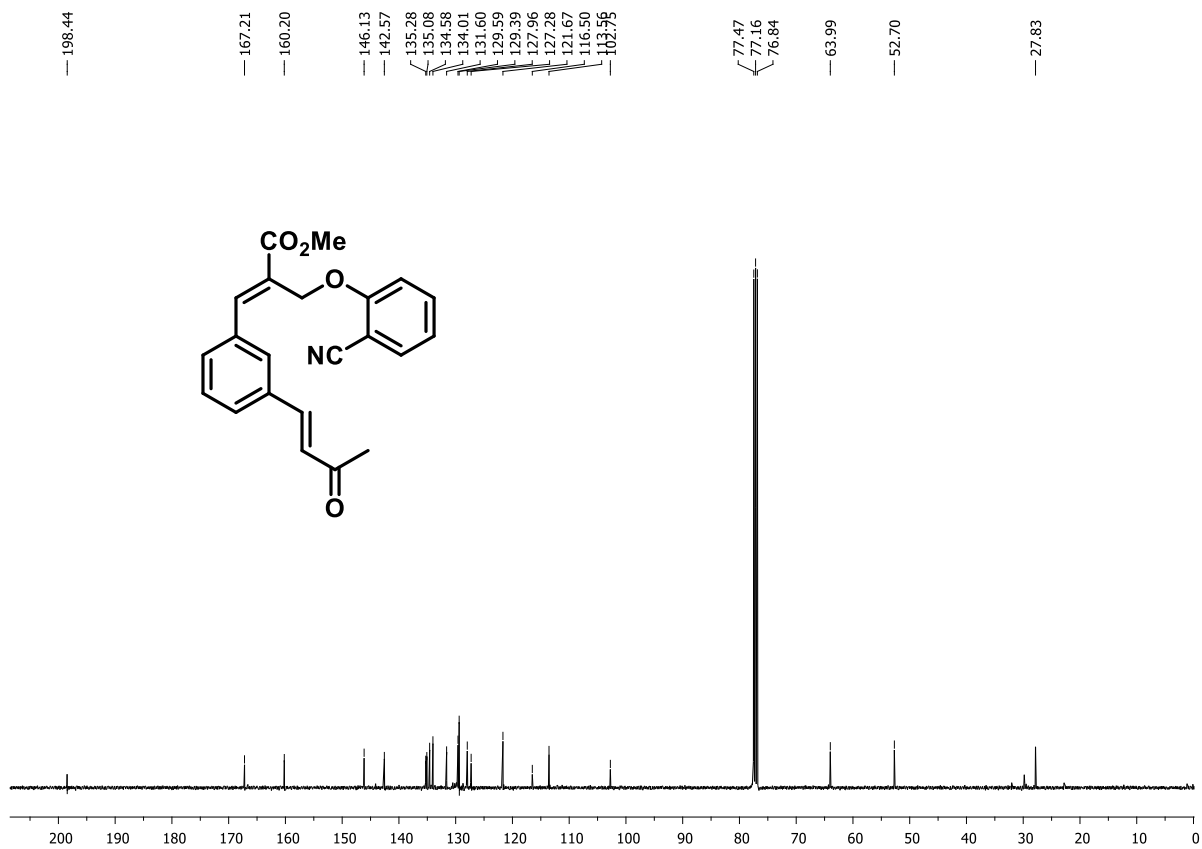

Methyl (*E*)-2-((2-cyanophenoxy)methyl)-3-(3-((*E*)-2-(phenylsulfonyl)vinyl)phenyl)acrylate (**3r**)

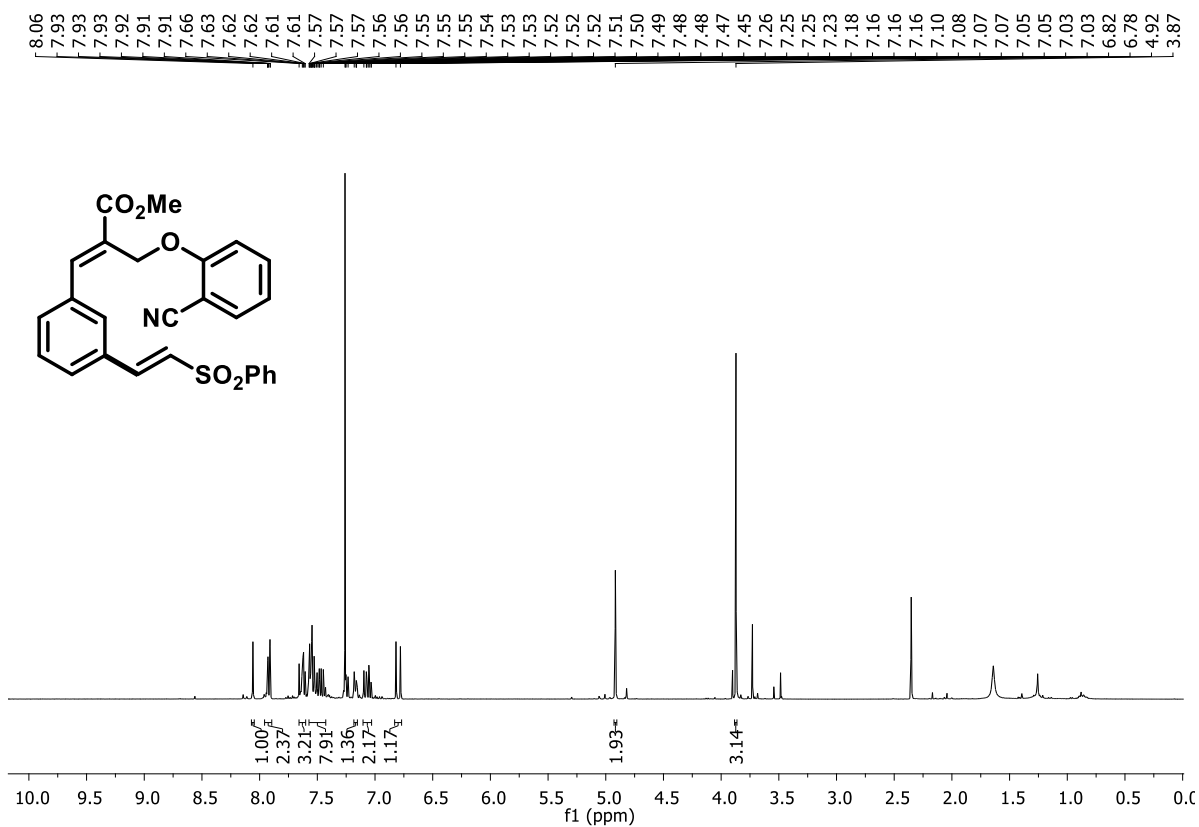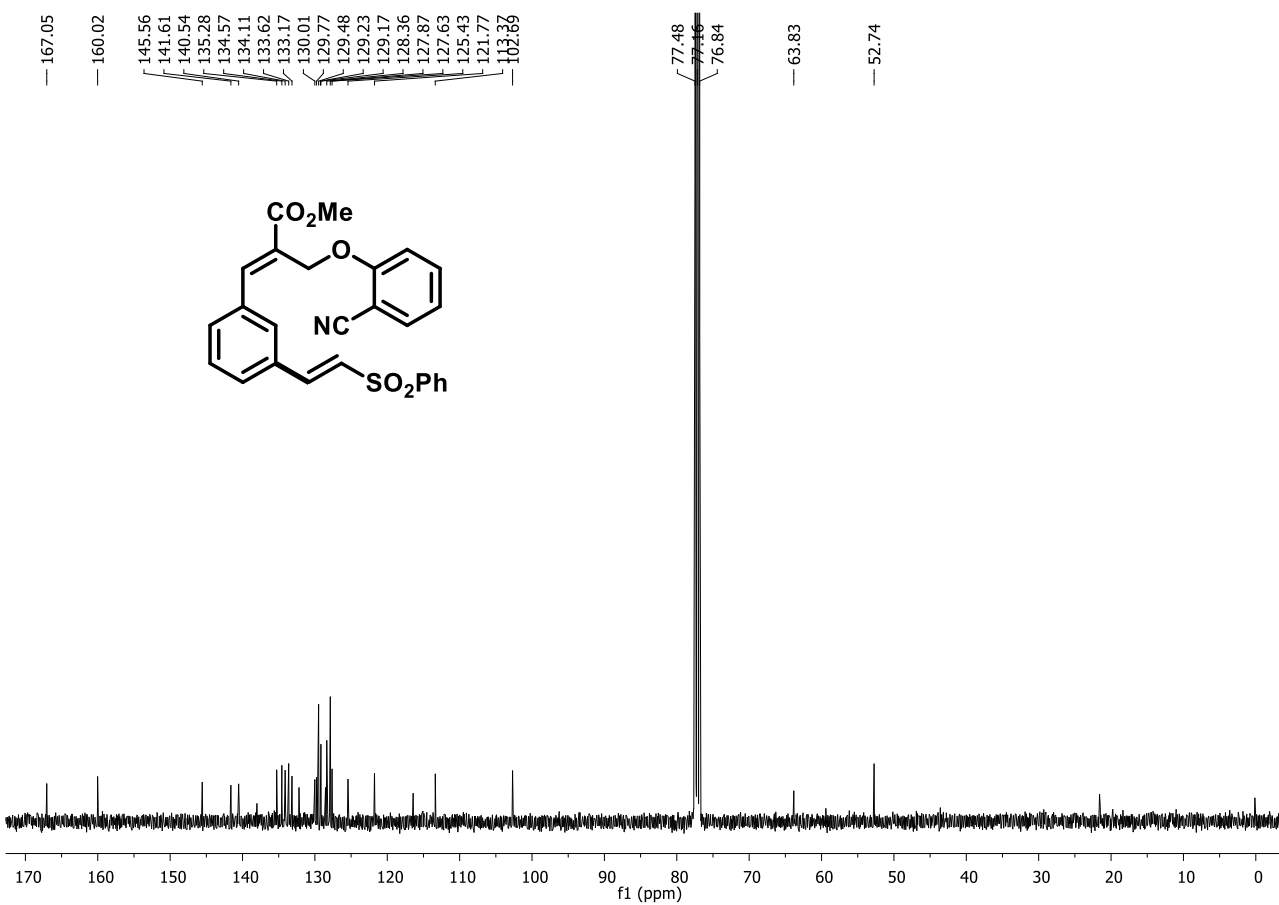

**Ethyl (E)-2-((2-cyanophenoxy) methyl)-3-(3-((E)-3-methoxy-3-oxoprop-1-en-1-yl)phenyl) acrylate (4a)**

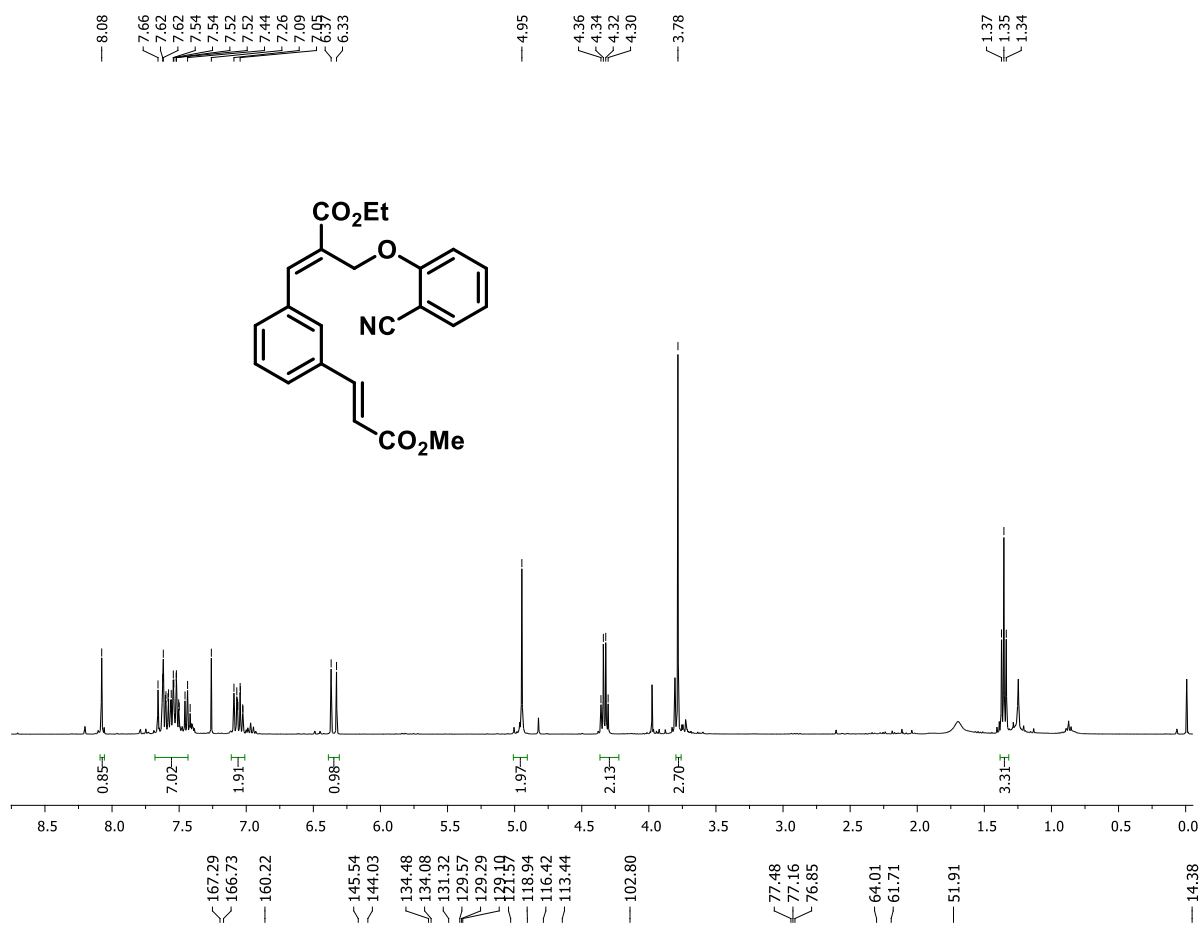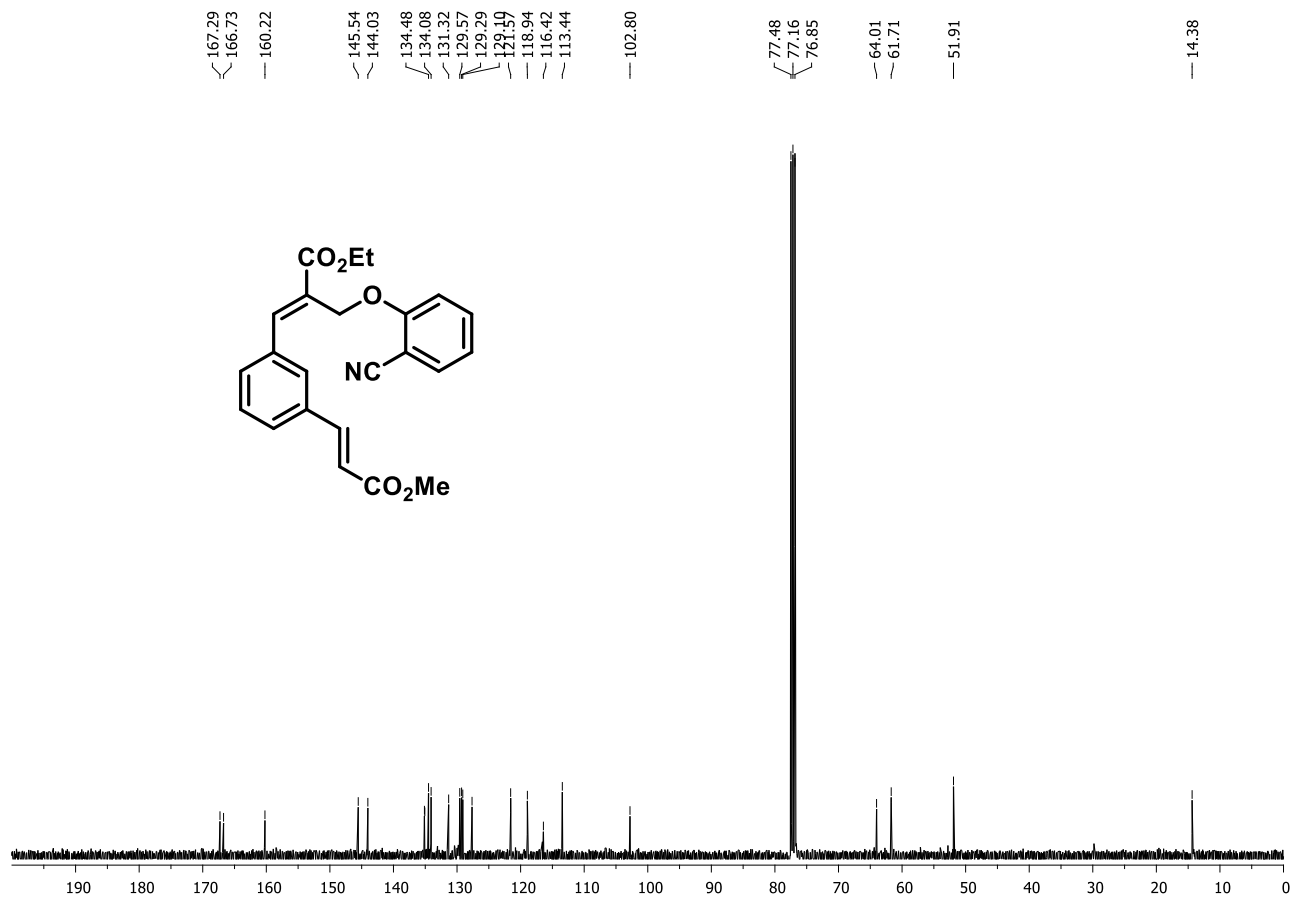

**Ethyl (*E*)-2-((2-cyanophenoxy) methyl)-3-(3-((*E*)-3-ethoxy-3-oxoprop-1-en-1-yl) phenyl) acrylate (4b)**

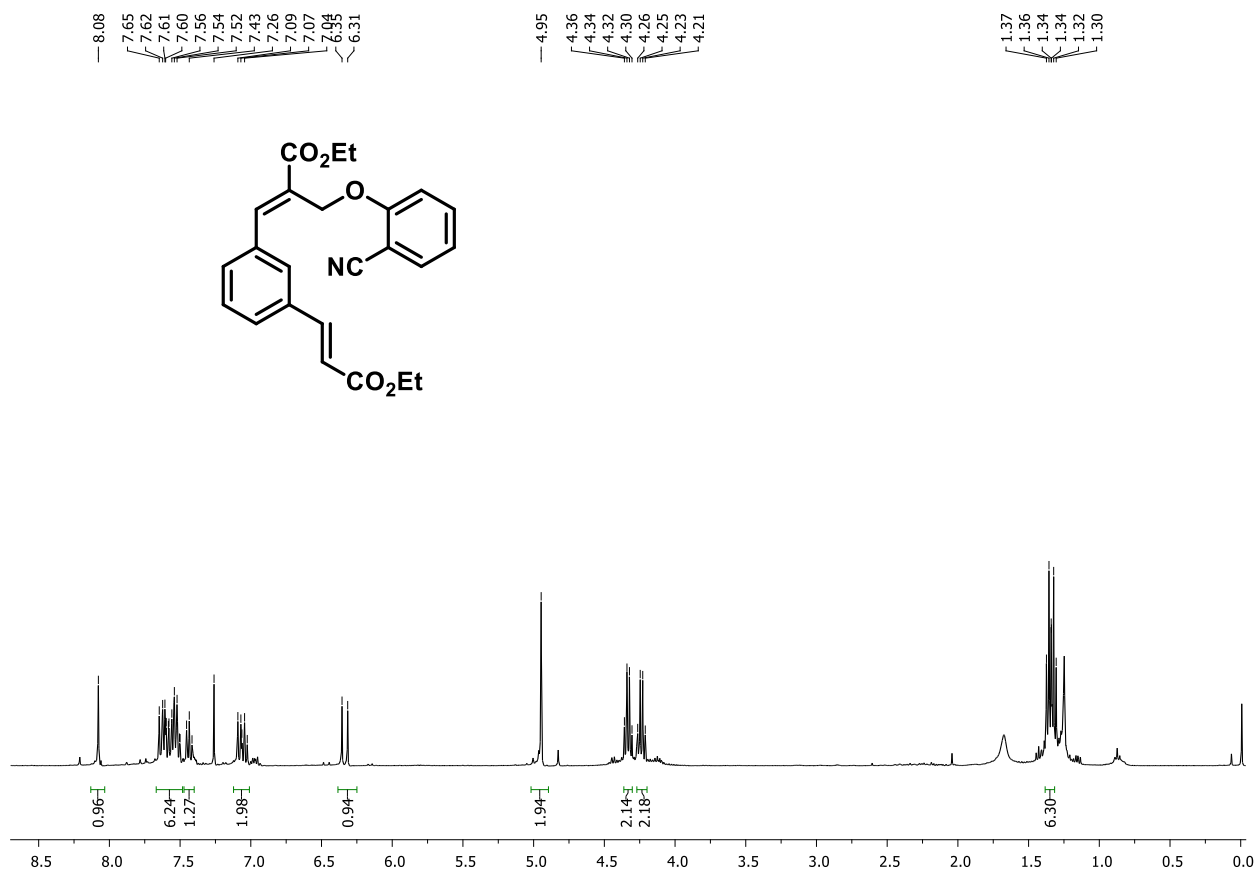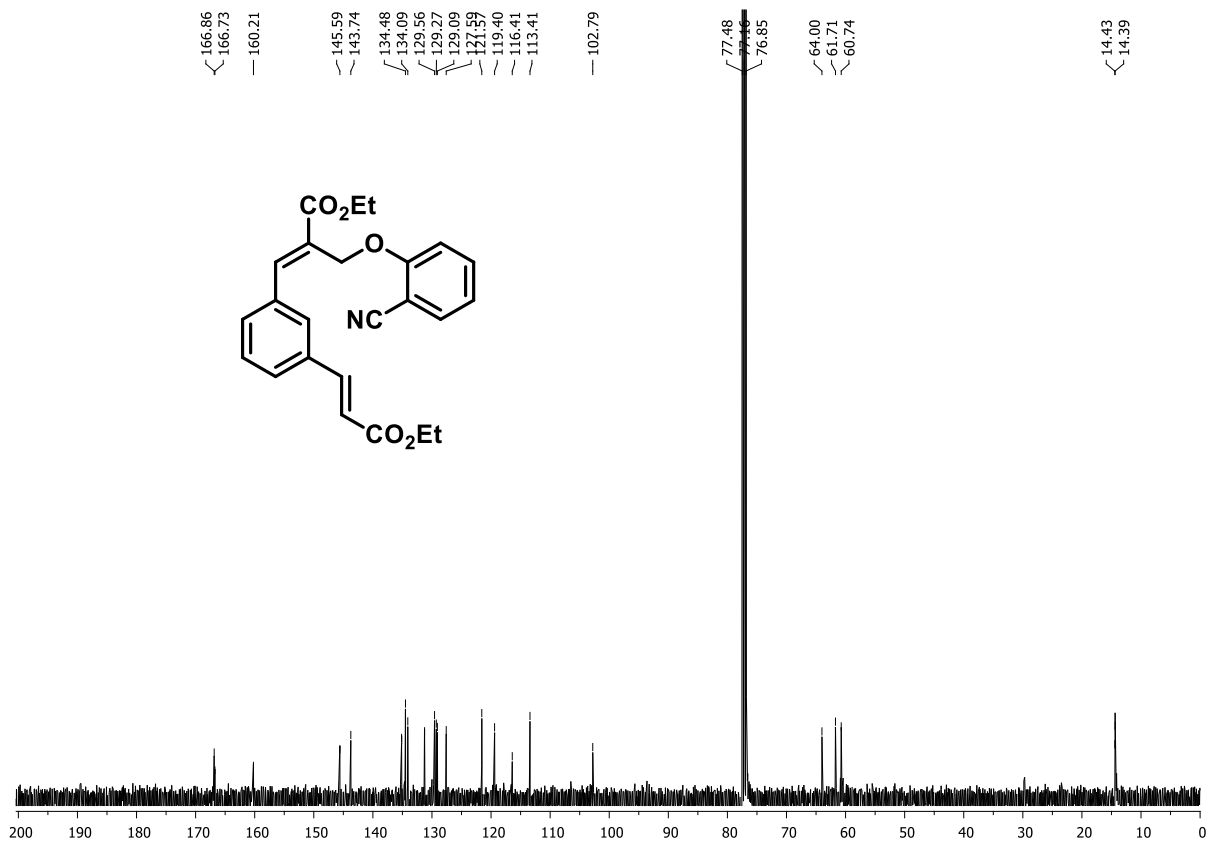

Ethyl (E)-3-(3-((E)-3-(tert-butoxy)-3-oxoprop-1-en-1-yl) phenyl)-2-((2-cyanophenoxy)methyl)acrylate (4c)

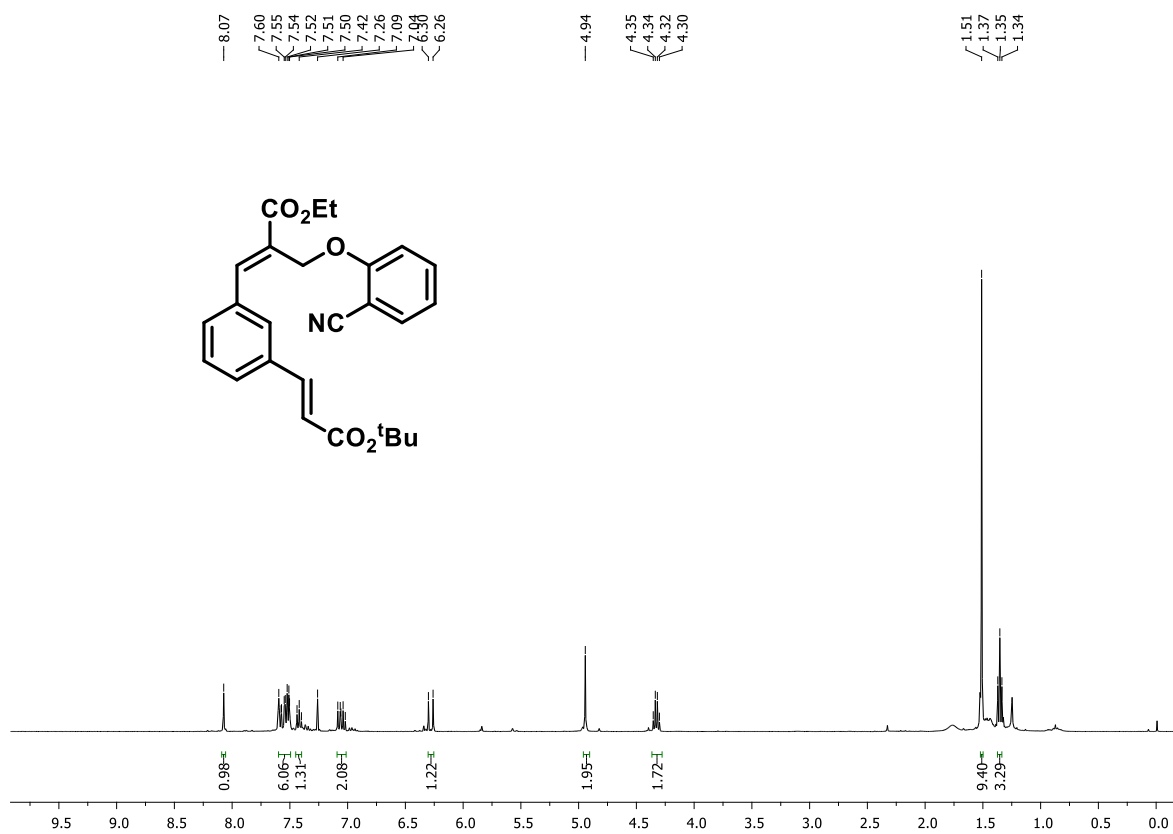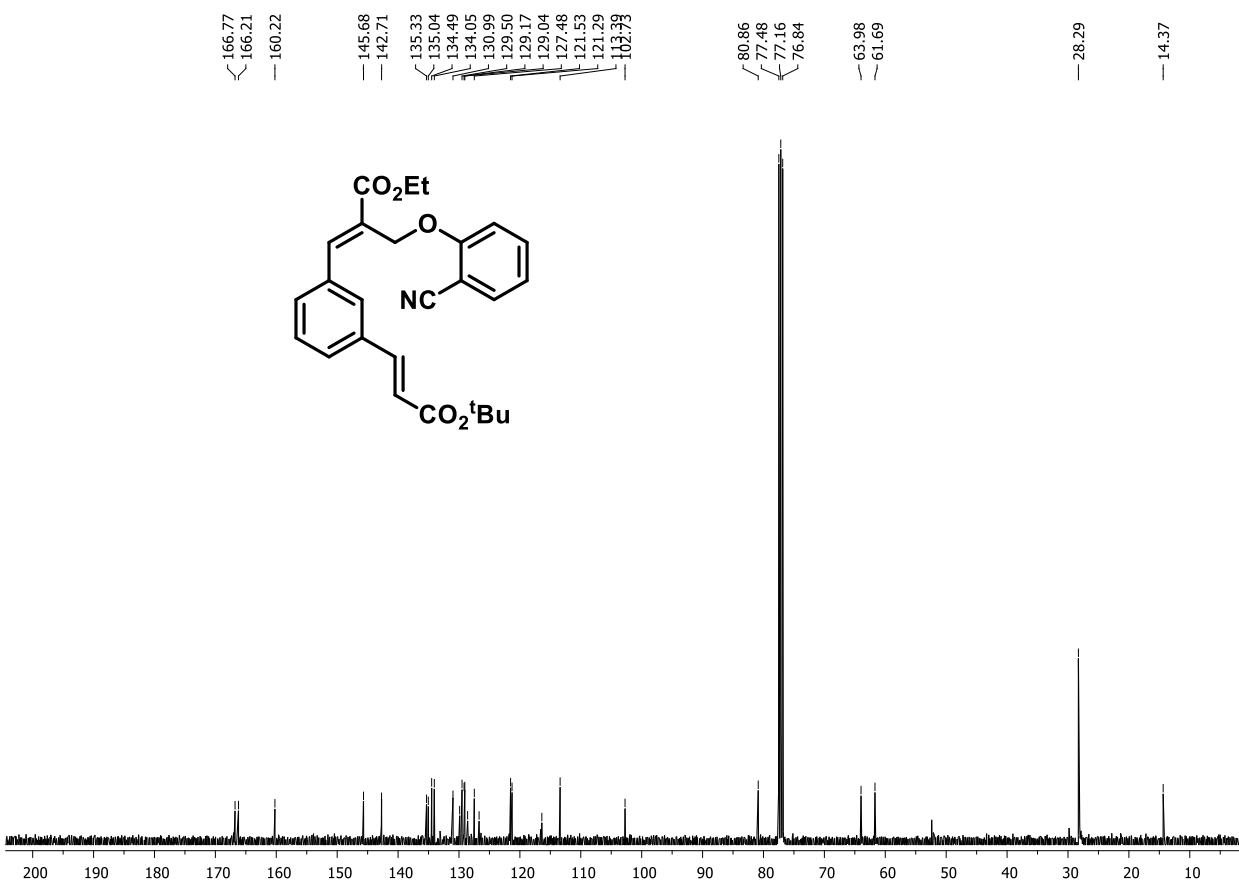



**Butyl (*E*)-2-((2-cyanophenoxy) methyl)-3-(3-((*E*)-3-methoxy-3-oxoprop-1-en-1-yl)phenyl) acrylate (4d)**

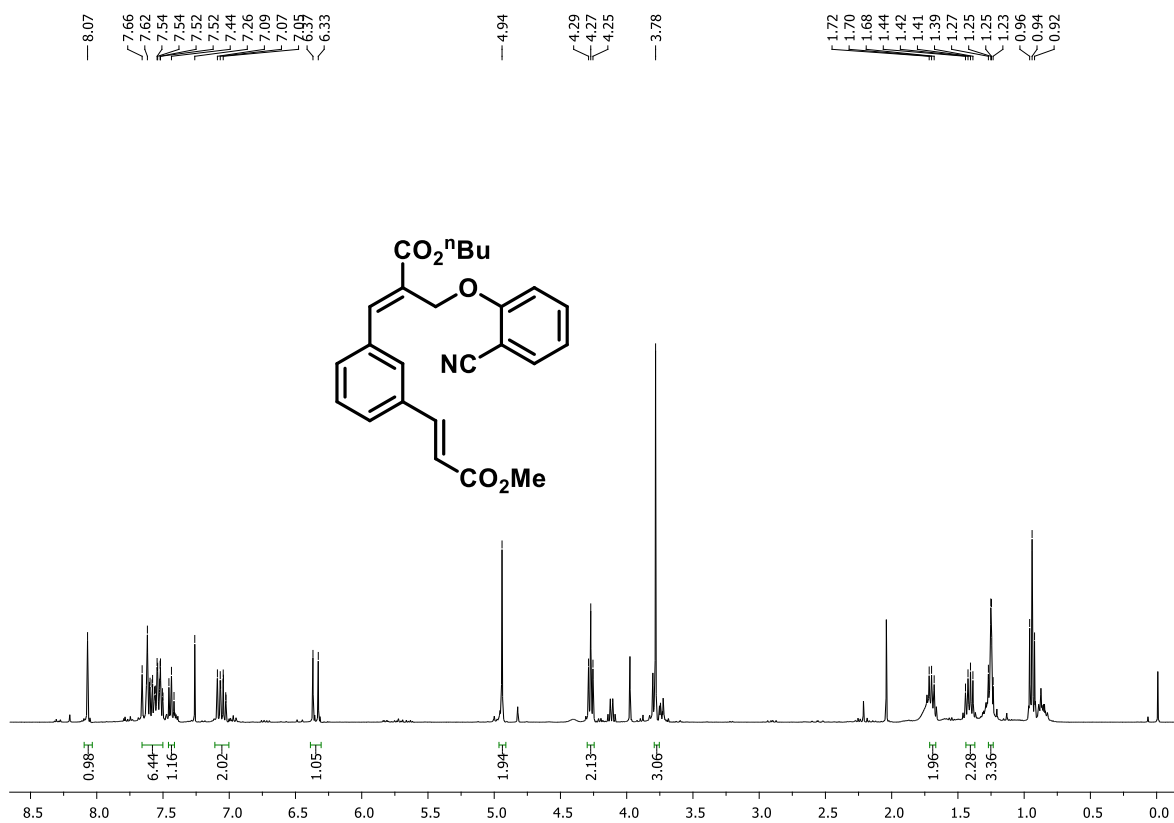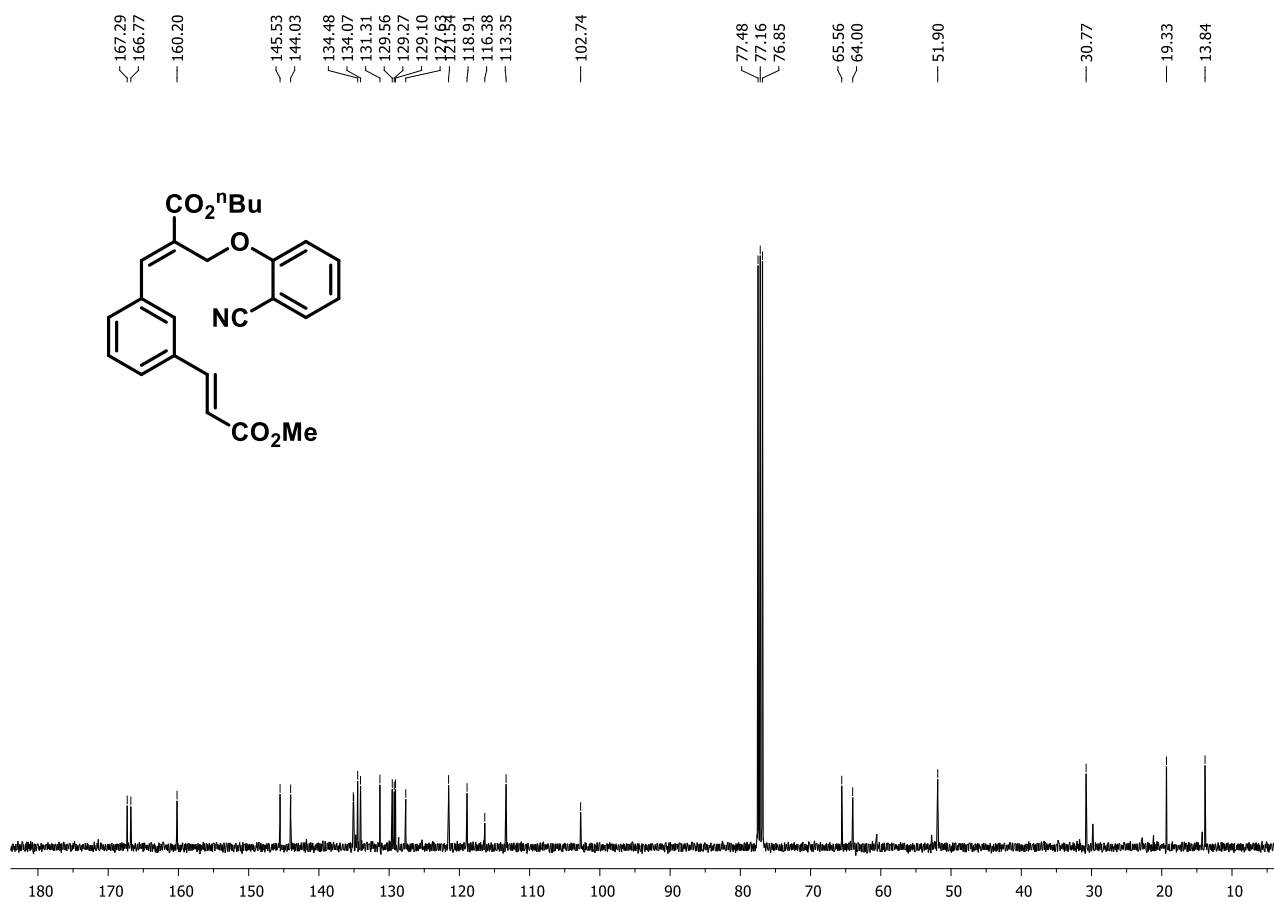

Butyl (E)-2-((2-cyanophenoxy) methyl)-3-(3-((E)-3-ethoxy-3-oxoprop-1-en-1-yl)phenyl) acrylate (4e)

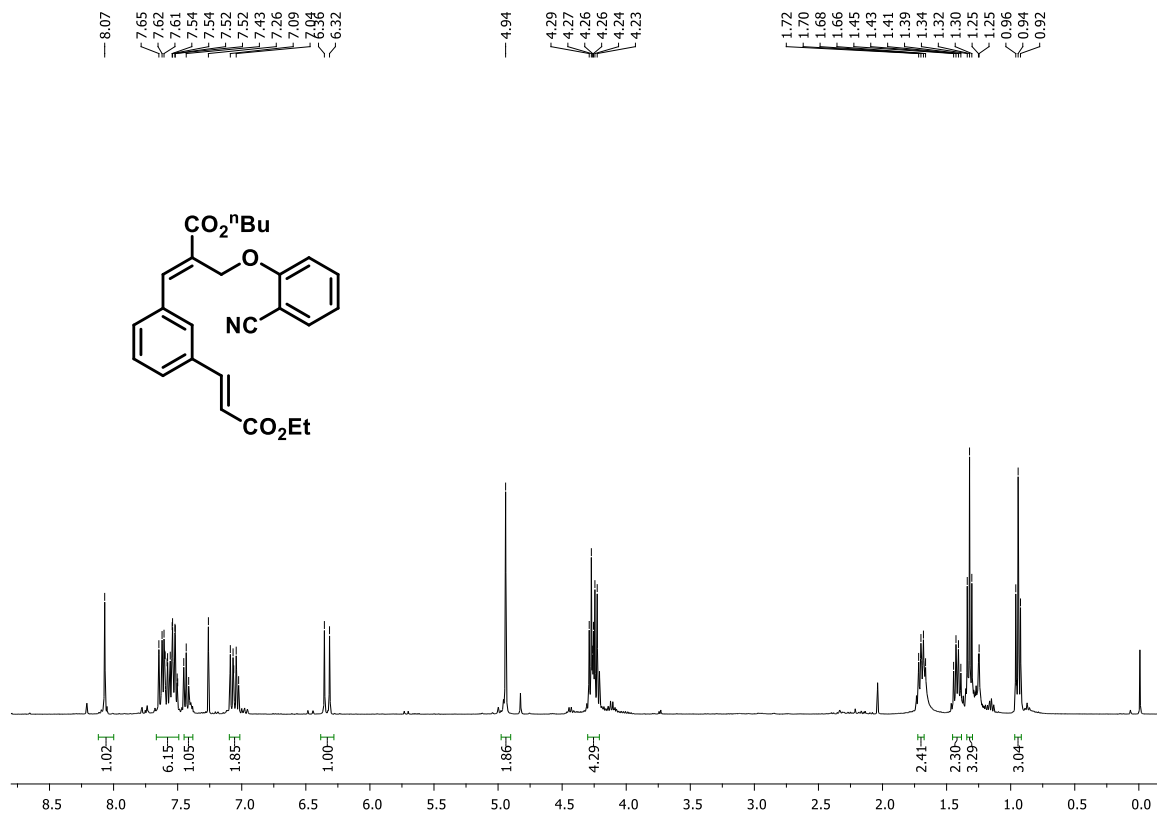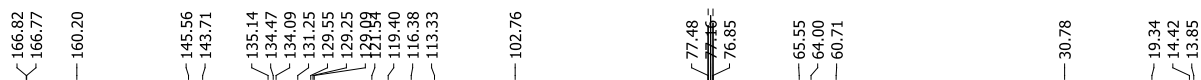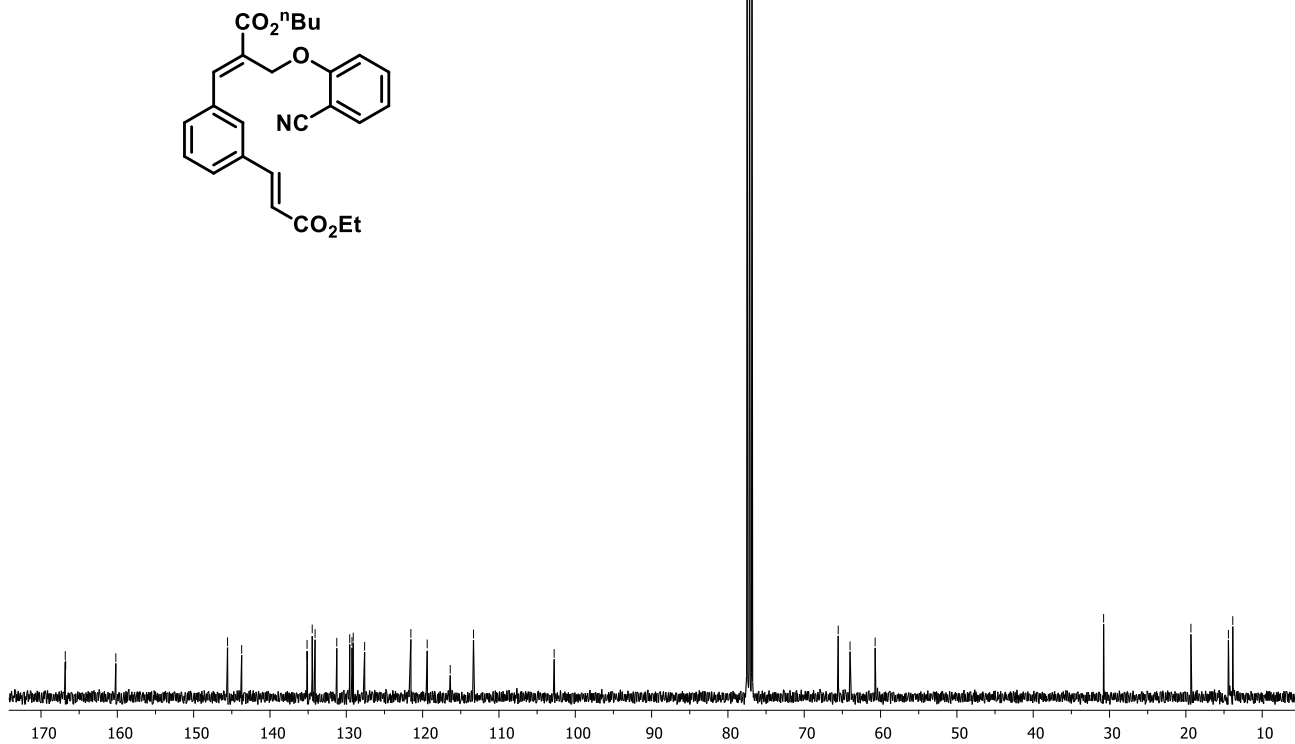

Butyl (E)-3-(3-((E)-3-(tert-butoxy)-3-oxoprop-1-en-1-yl)phenyl)-2-((2-cyanophenoxy)methyl) acrylate (4f)

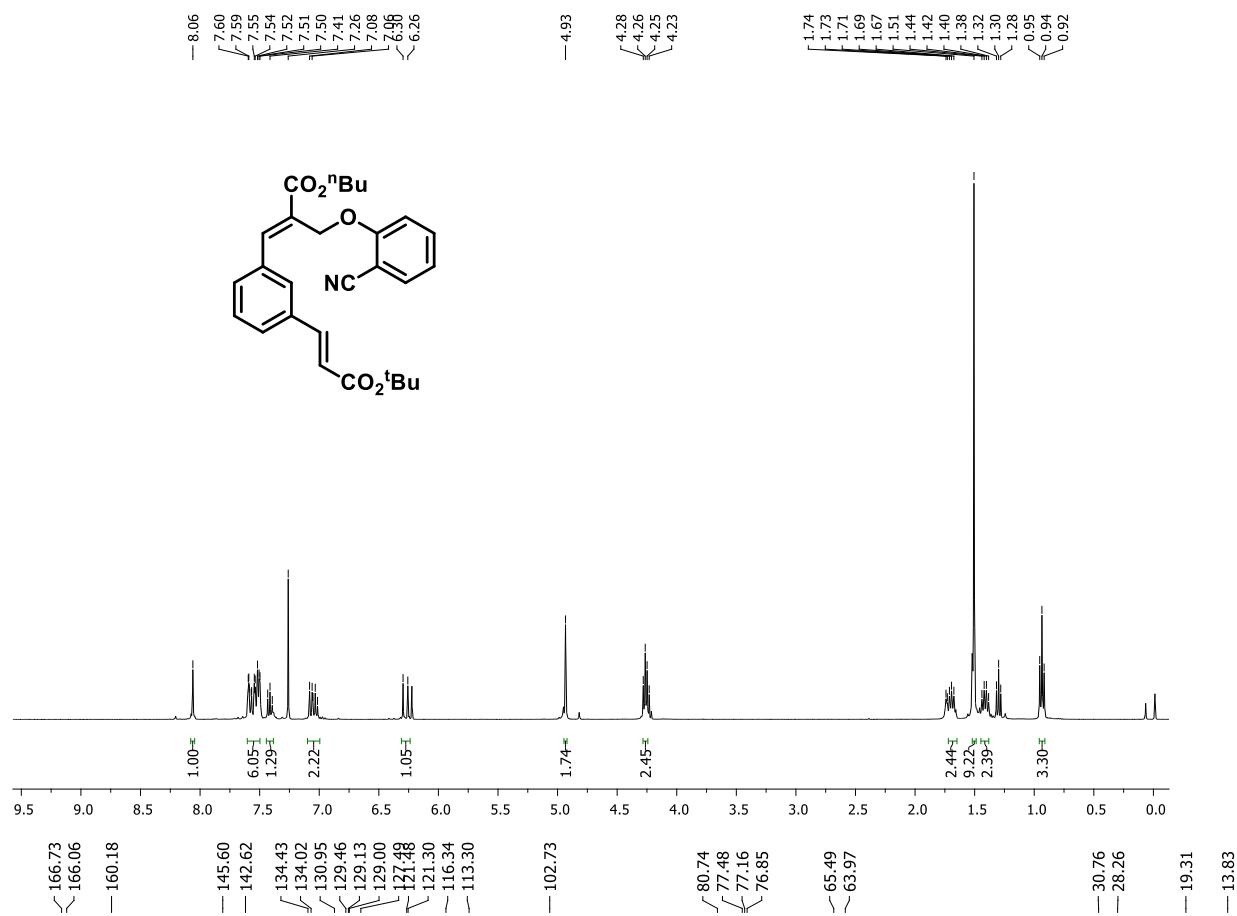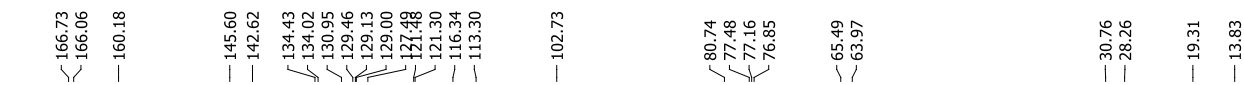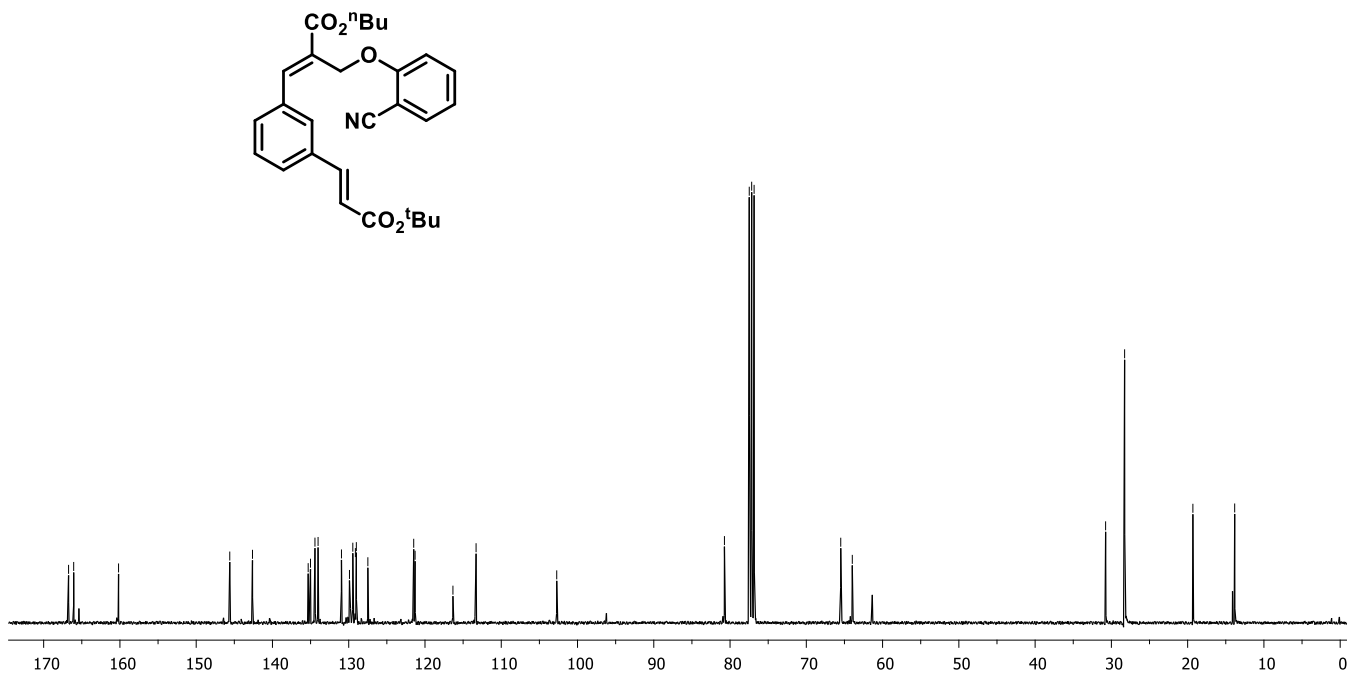

Methyl (*E*)-2-((2-cyanophenoxy)methyl)-3-(5-((*E*)-3-ethoxy-3-oxoprop-1-en-1-yl)-2-methylphenyl)acrylate  
(4g)

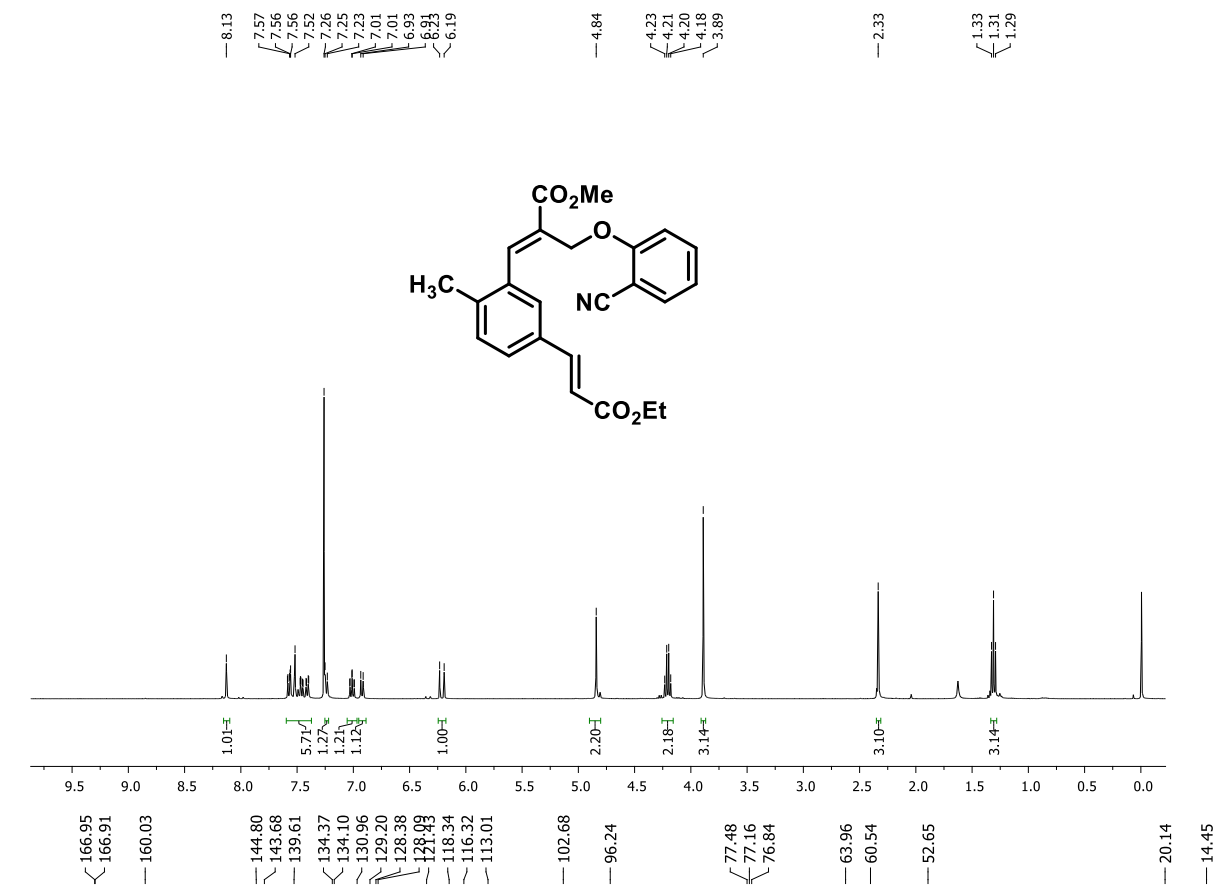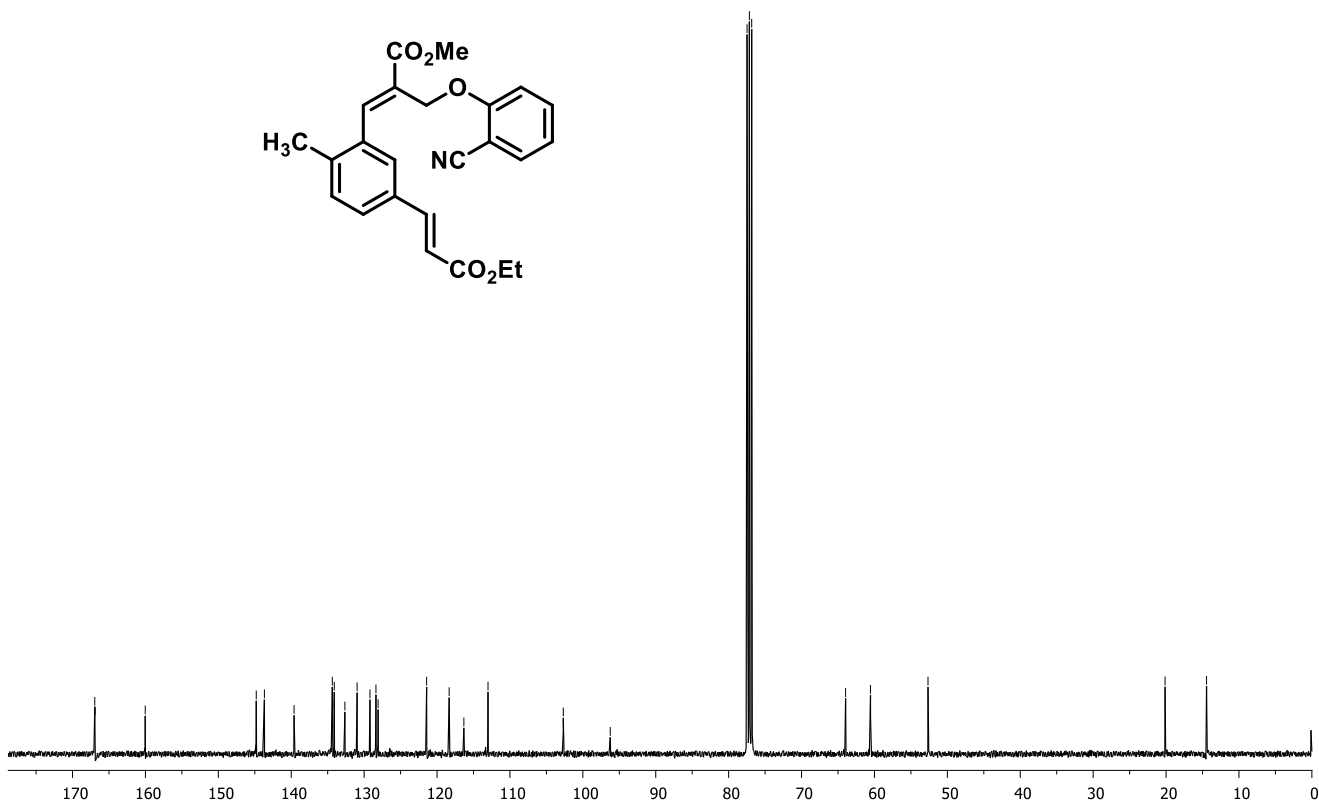

**Methyl (E)-2-((2-cyanophenoxy)methyl)-3-(5-((E)-3-((2-ethylhexyl)oxy)-3-oxoprop-1-en-1-yl)-2-methylphenyl)acrylate (4h)**

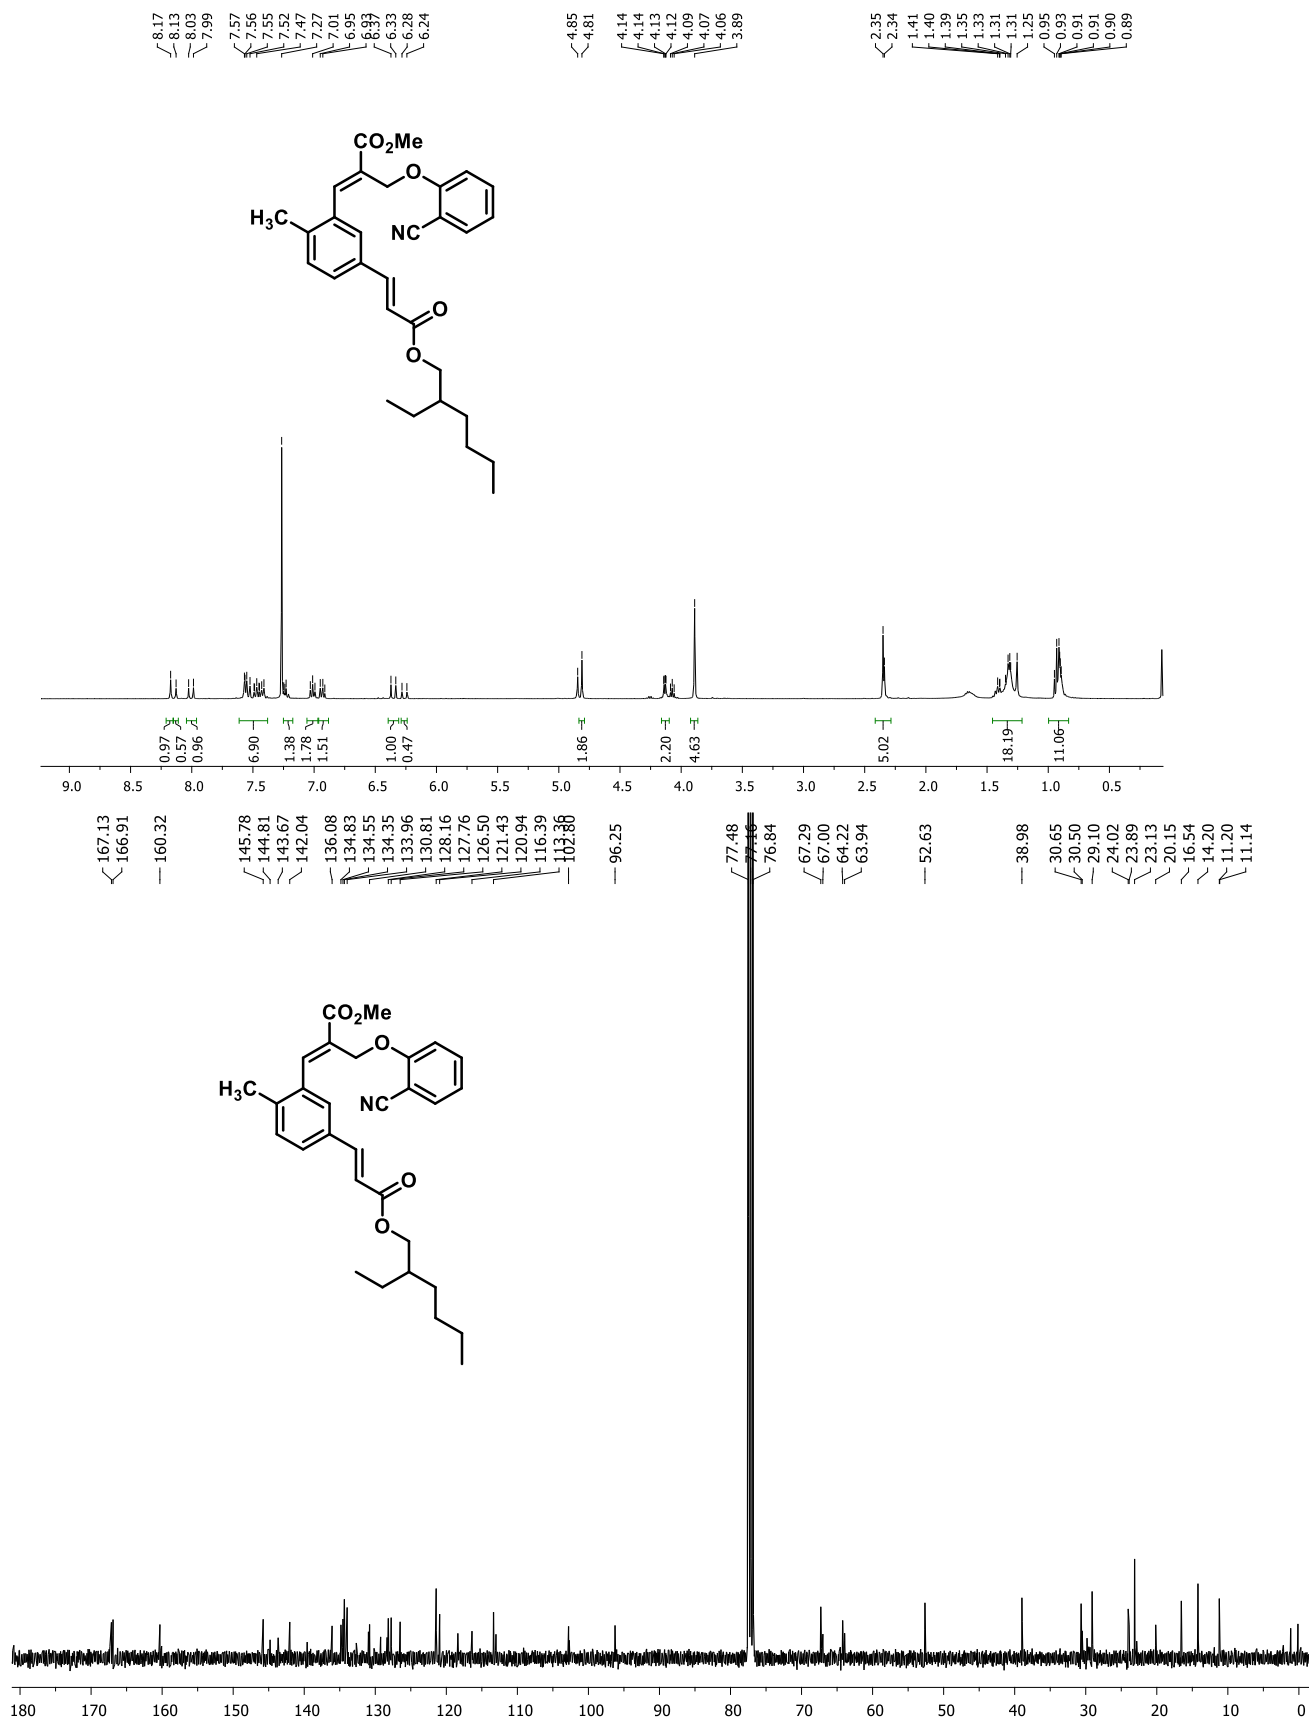

Methyl (E)-2-((2-cyanophenoxy)methyl)-3-(2-methyl-5-((E)-3-oxo-3-(((1R,2R,4R)-1,7,7-trimethylbicyclo[2.2.1]heptan-2-yl)oxy)prop-1-en-1-yl)phenyl)acrylate (4i)

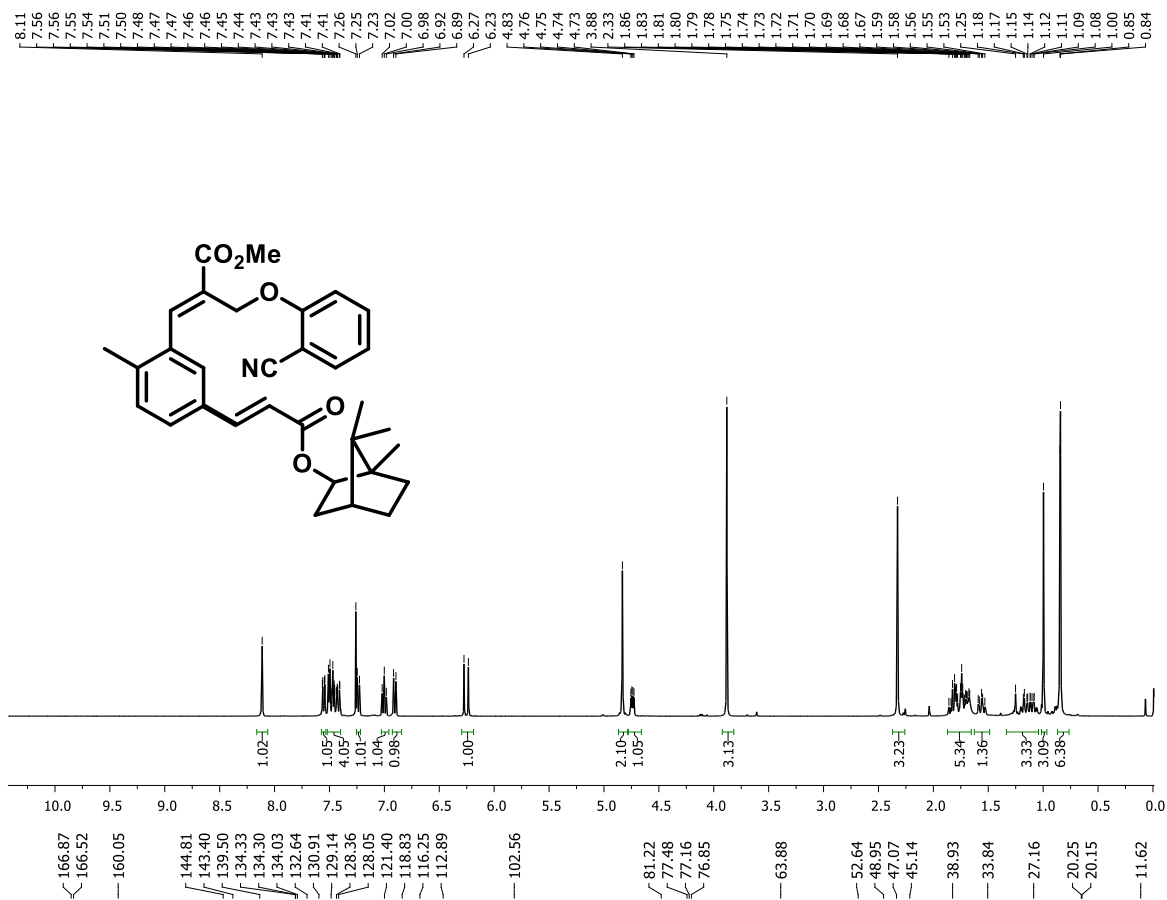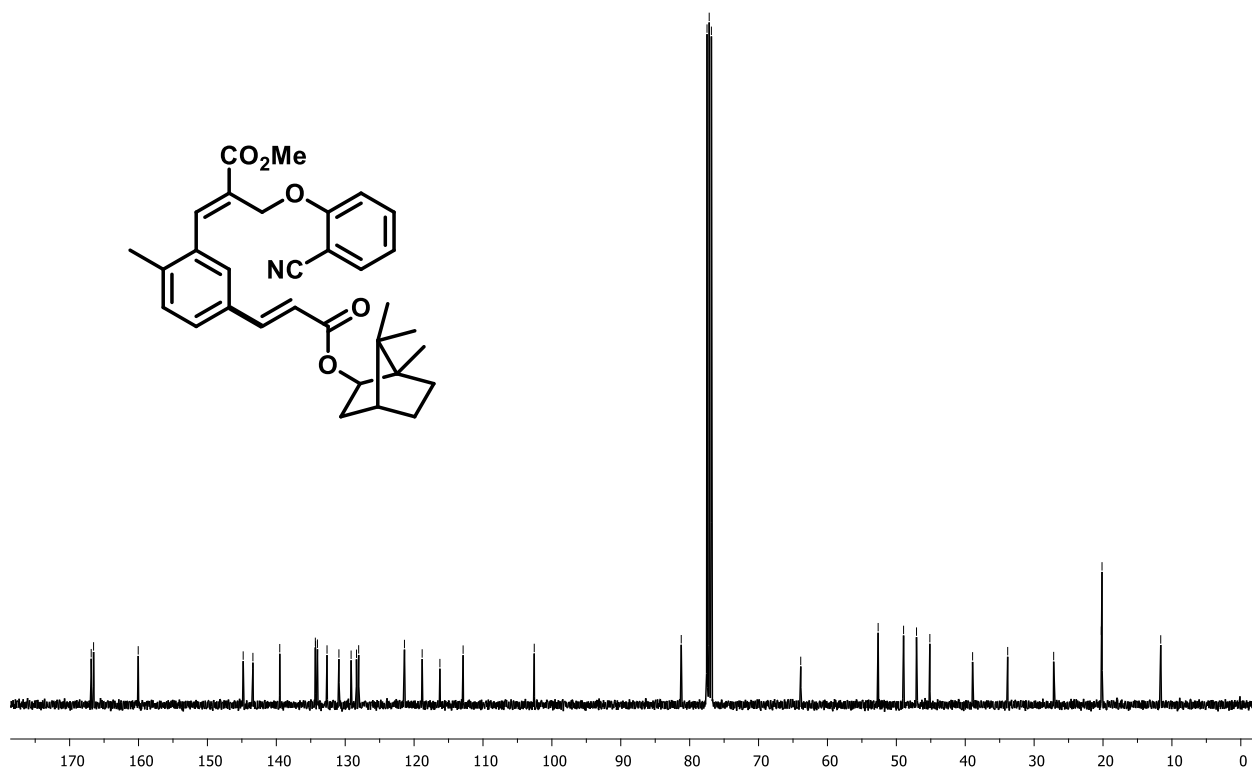

Methyl (*E*)-2-((2-cyanophenoxy)methyl)-3-(2-methyl-5-((*E*)-2-(phenylsulfonyl)vinyl)phenyl) acrylate (**4j**)

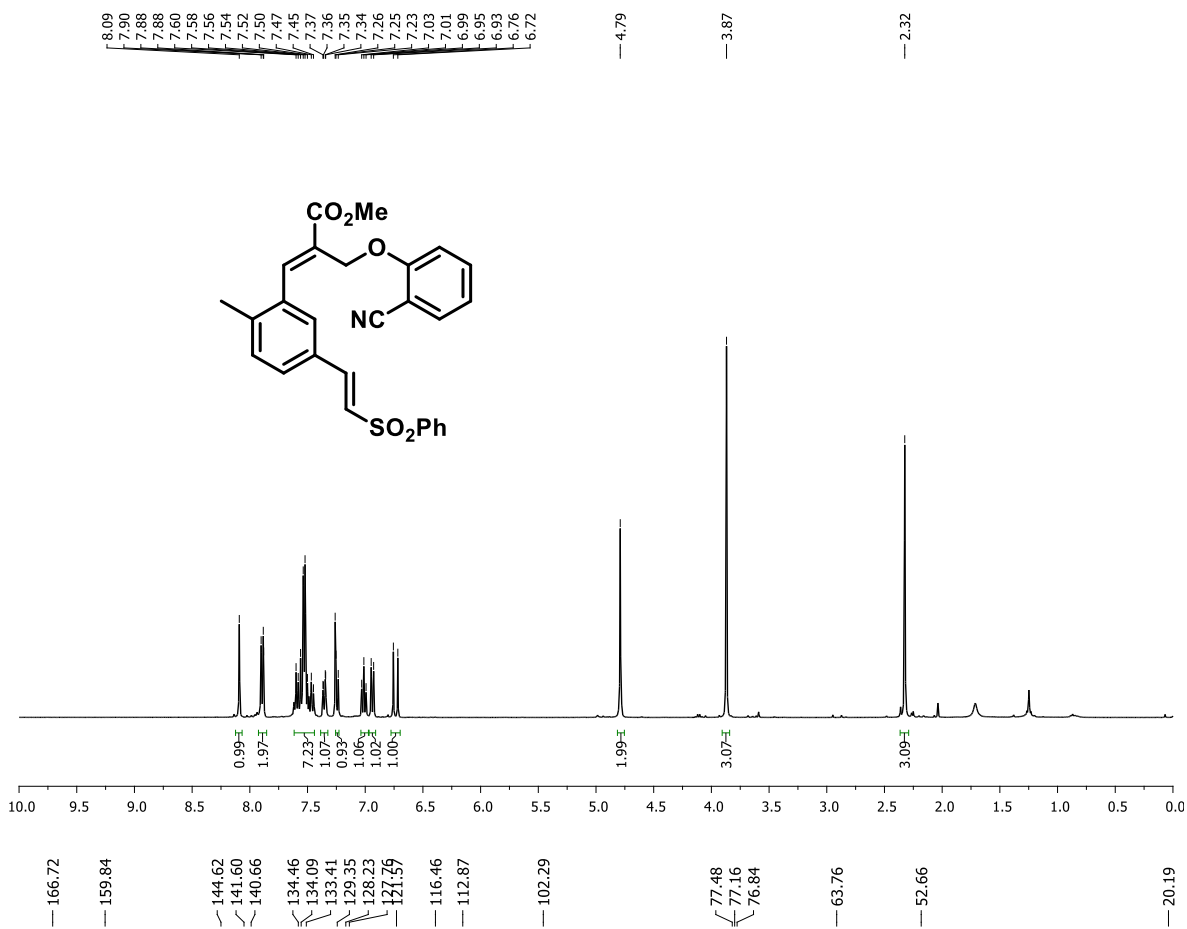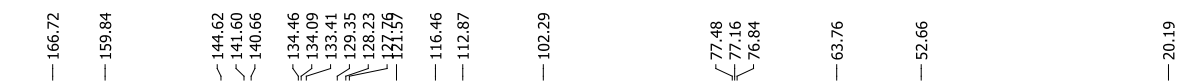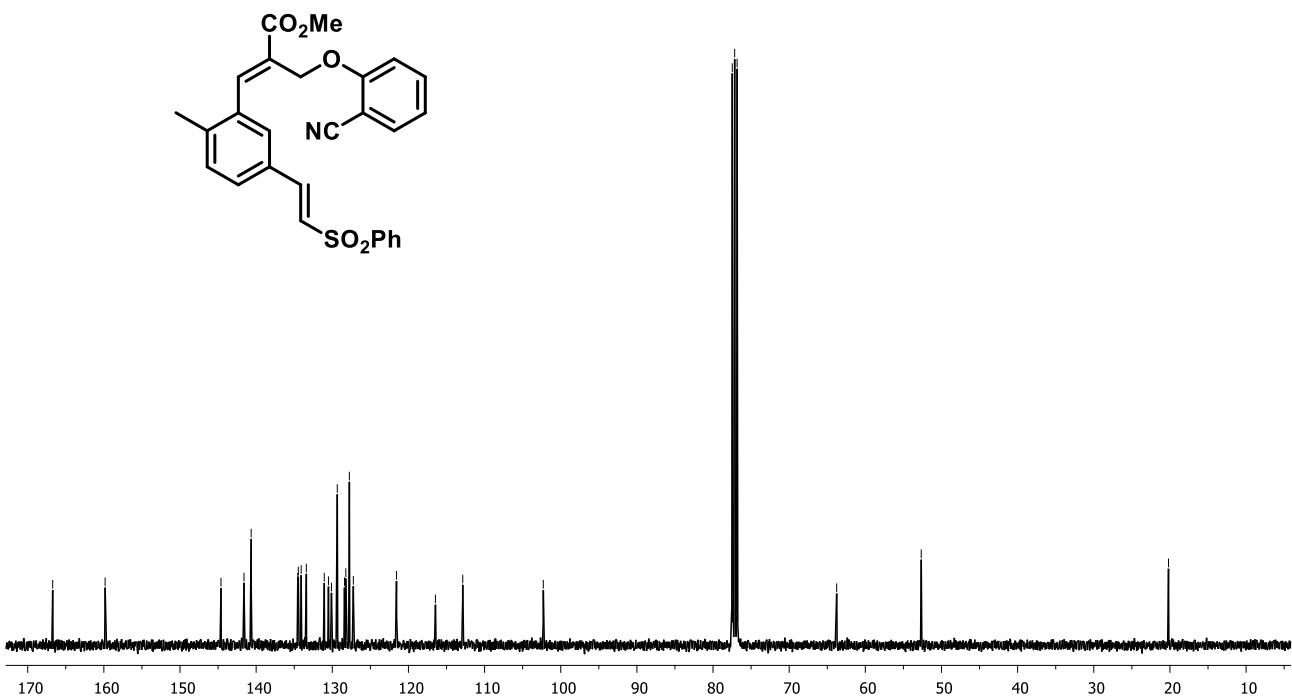

Methyl (E)-2-((2-cyanophenoxy)methyl)-3-(2-methoxy-5-((E)-3-methoxy-3-oxoprop-1-en-1-yl)phenyl)acrylate (4k)

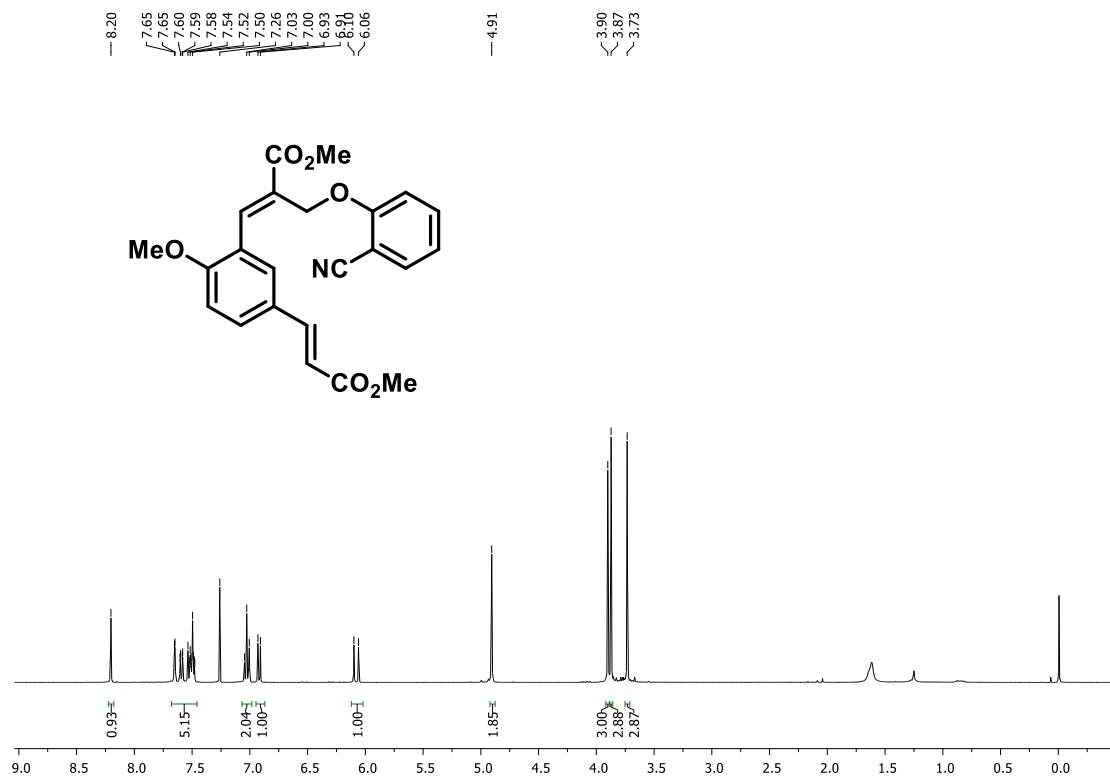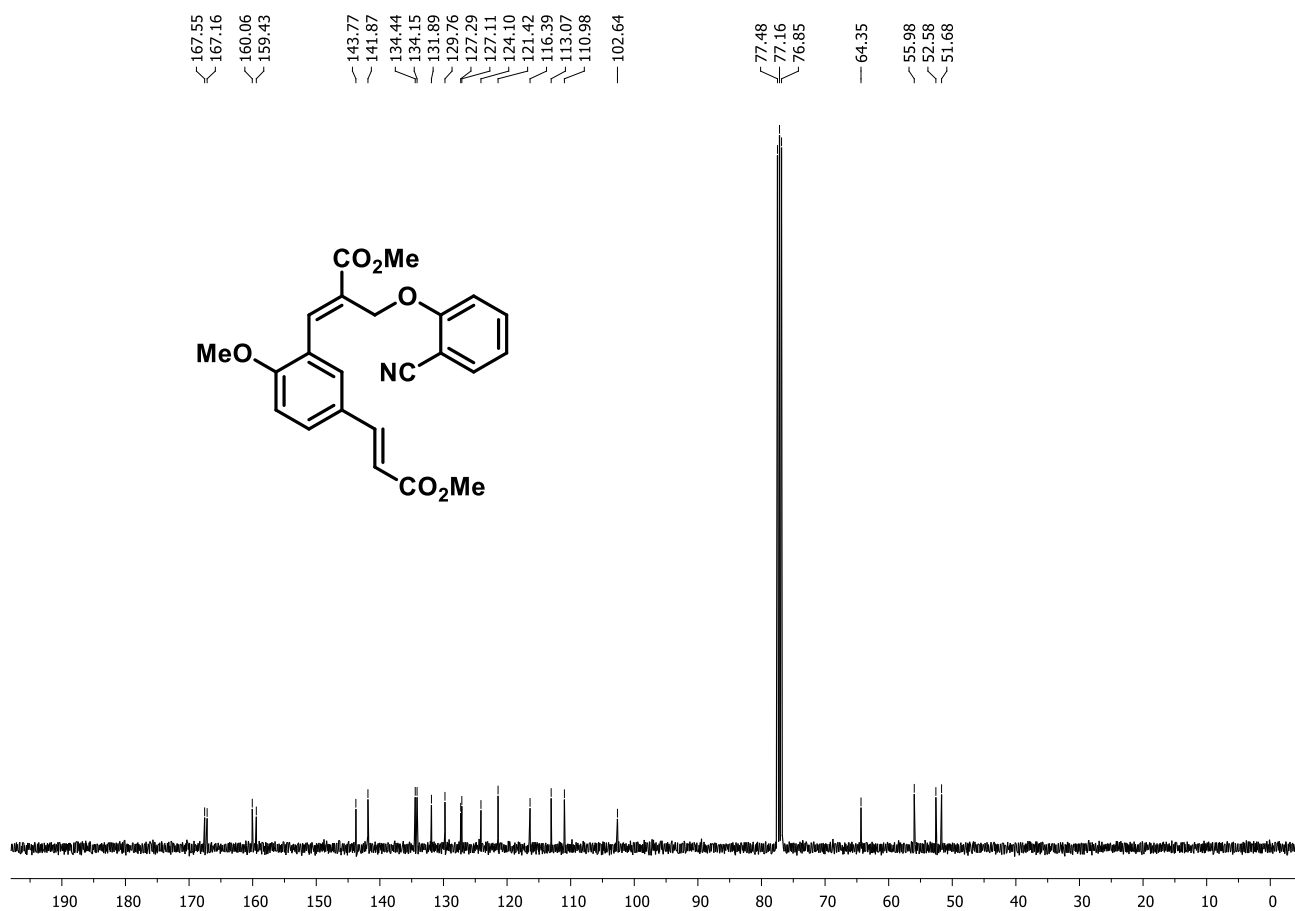



Methyl (*E*)-2-((2-cyanophenoxy) methyl)-3-(5-((*E*)-3-ethoxy-3-oxoprop-1-en-1-yl)-2-methoxyphenyl)acrylate (**4l**)

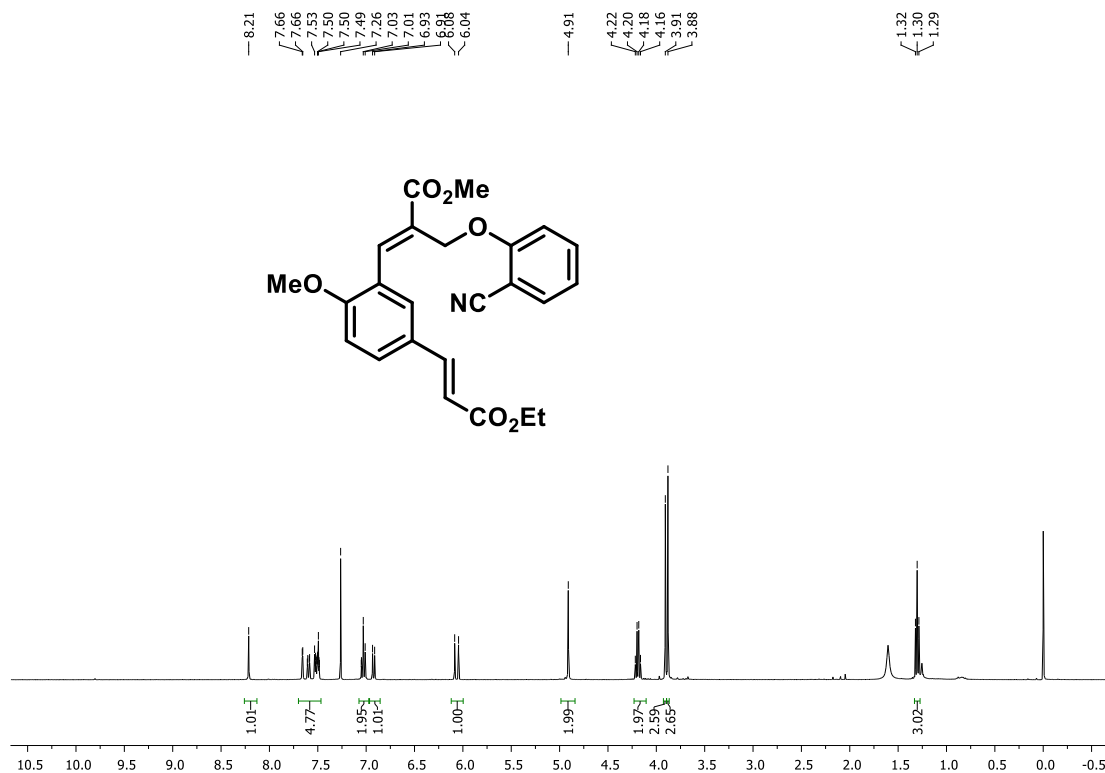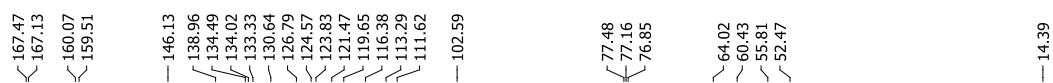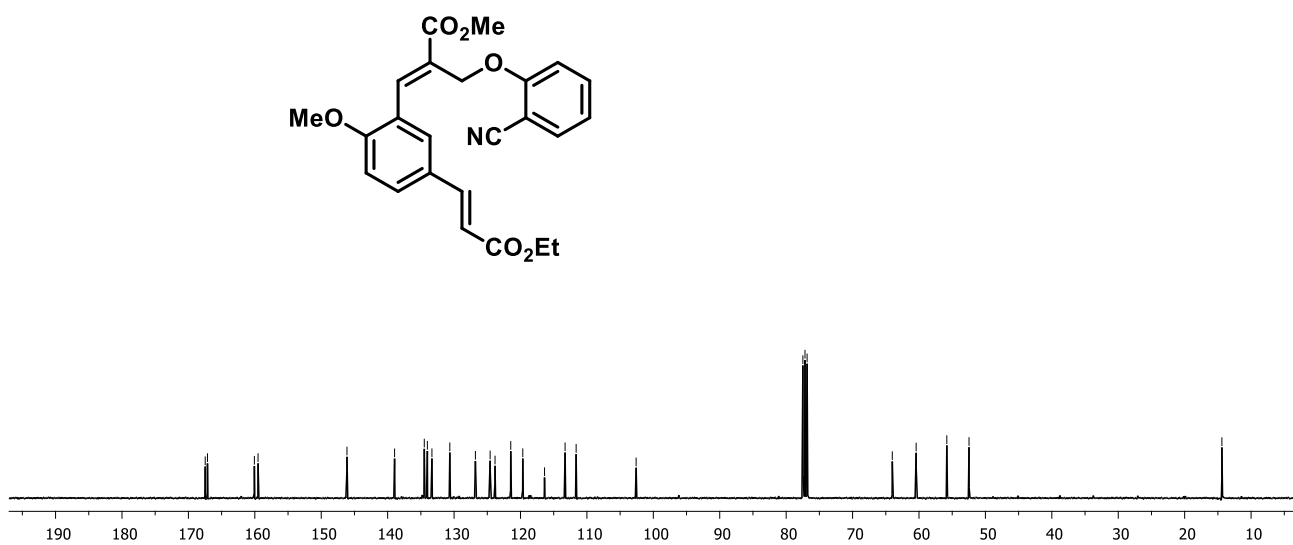

Methyl (*E*)-3-(5-((*E*)-3-(tert-butoxy)-3-oxoprop-1-en-1-yl)-2-methoxyphenyl)-2-((2-cyanophenoxy) methyl) acrylate (4m)

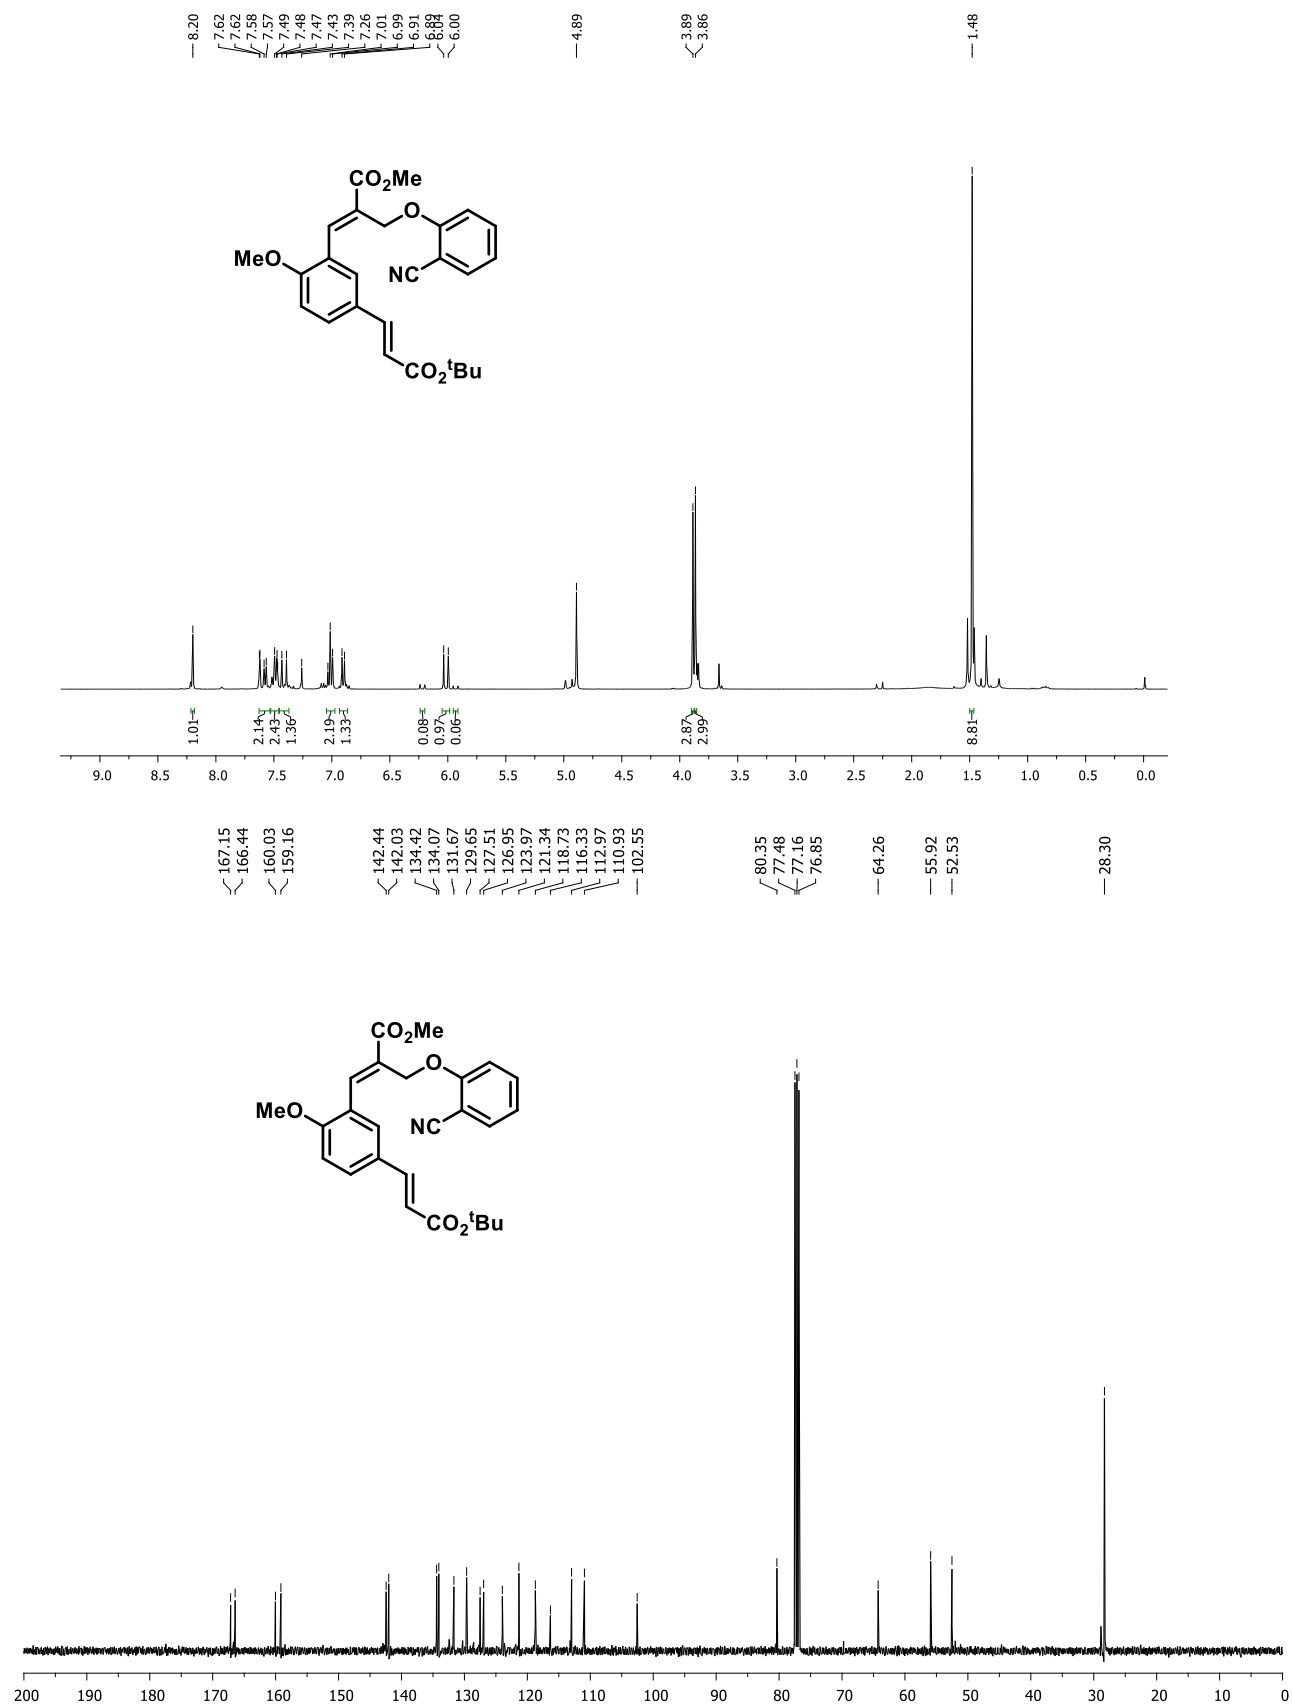

**Methyl (*E*)-2-((2-cyanophenoxy) methyl)-3-(5-((*E*)-3-((7, 7-dimethyl bicyclo [2.2.1] heptan-2-yl)oxy)-3-oxoprop-1-en-1-yl)-2-methoxyphenyl)acrylate (**4n**)**

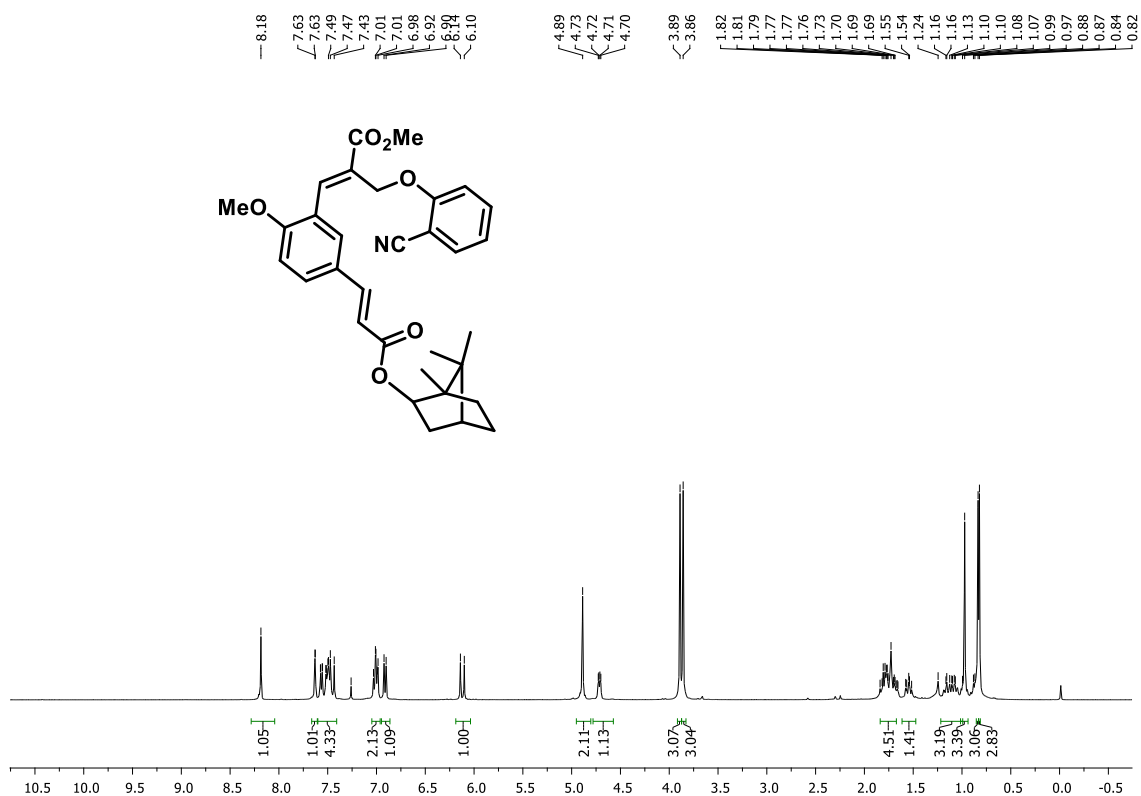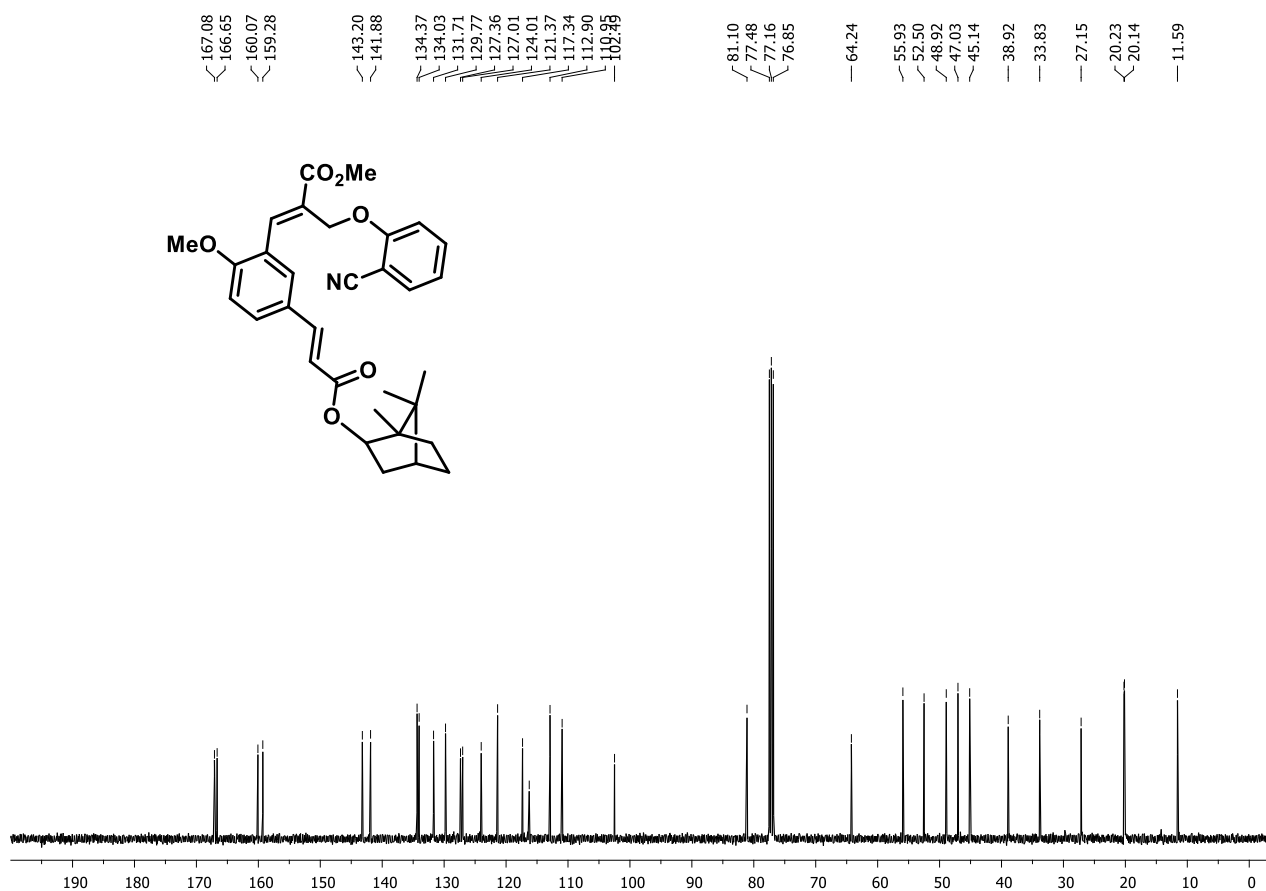

Methyl (E)-2-((2-cyanophenoxy)methyl)-3-(5-((E)-3-((2-ethylhexyl)oxy)-3-oxoprop-1-en-1-yl)-2-methoxyphenyl)acrylate (4o)

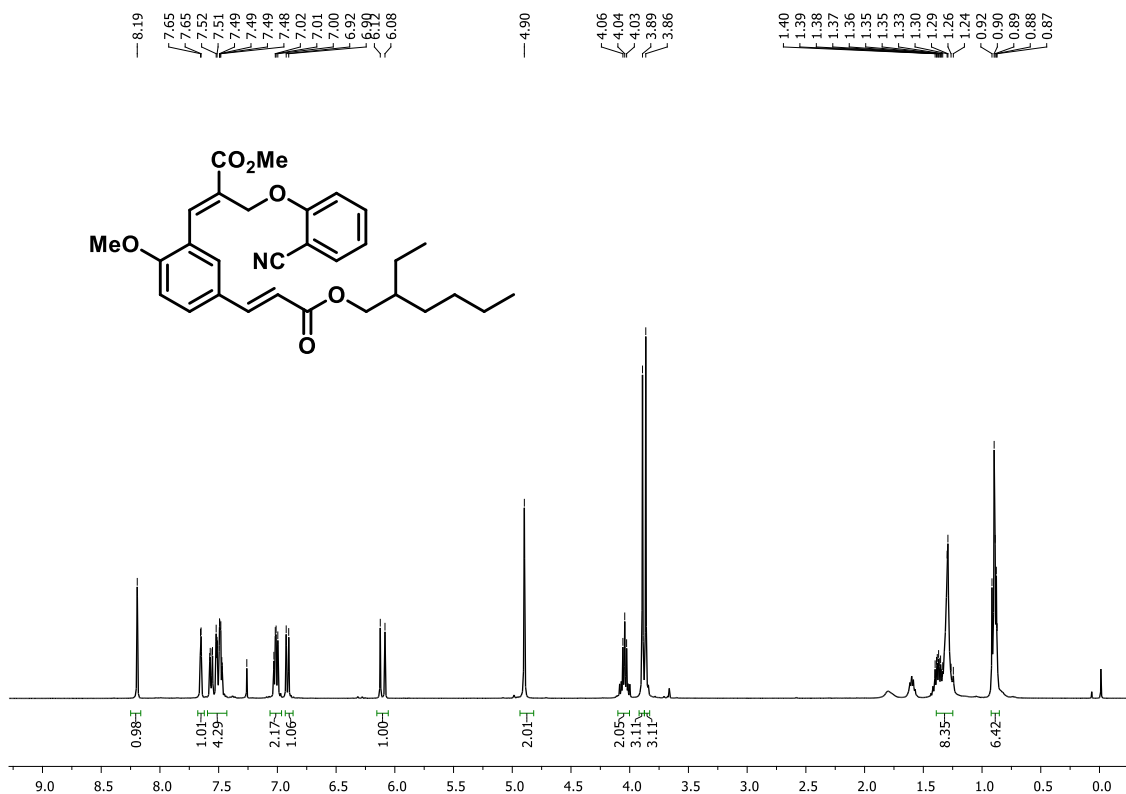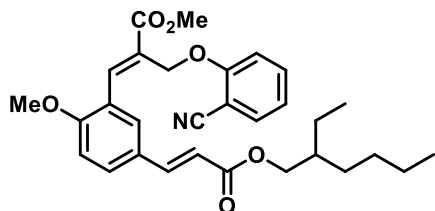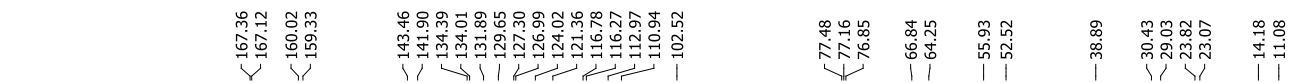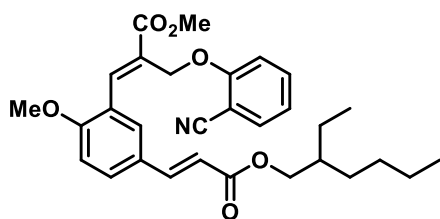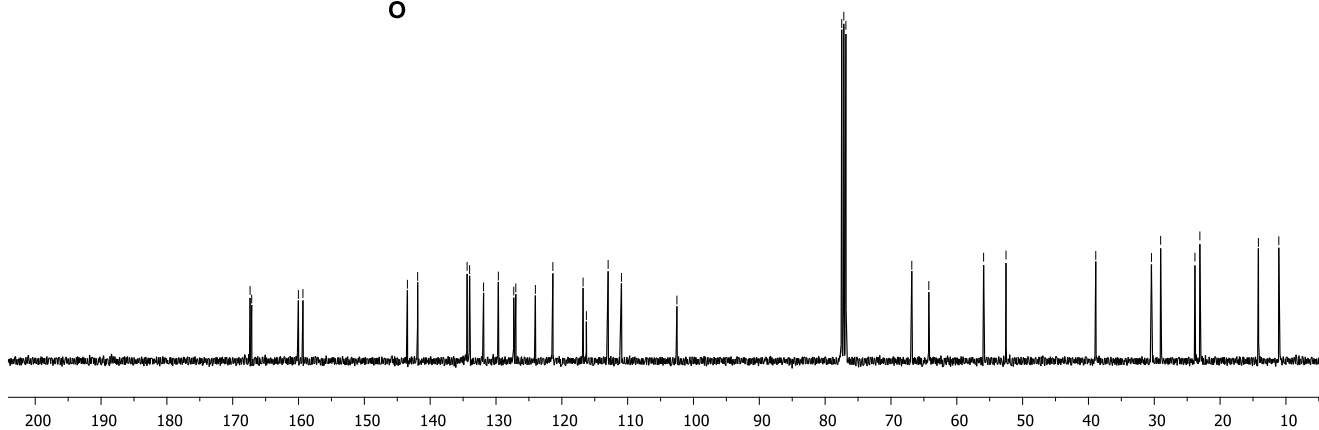

Methyl(*E*)-2-((2-cyanophenoxy)methyl)-3-(2-methoxy-5-((*E*)-2(phenylsulfonyl vinyl)phenyl)acrylate (4p)

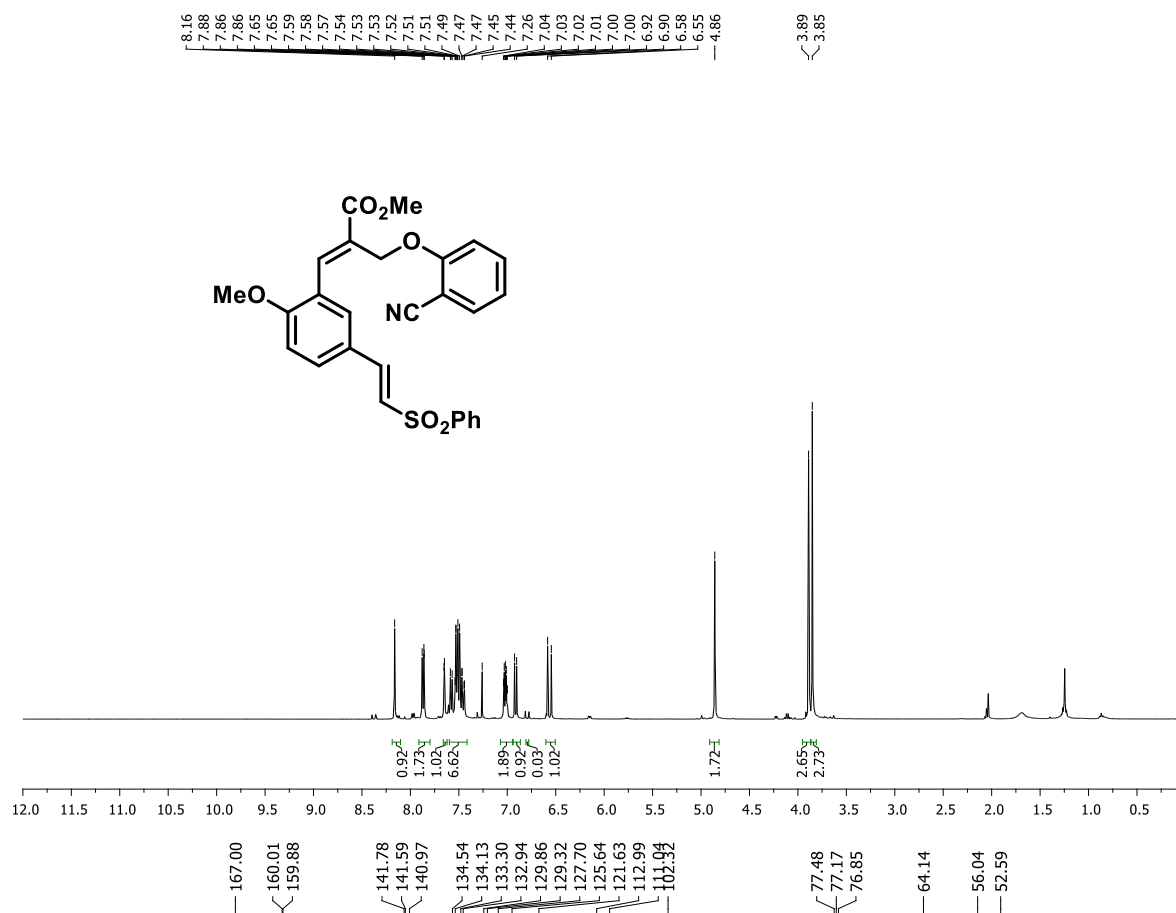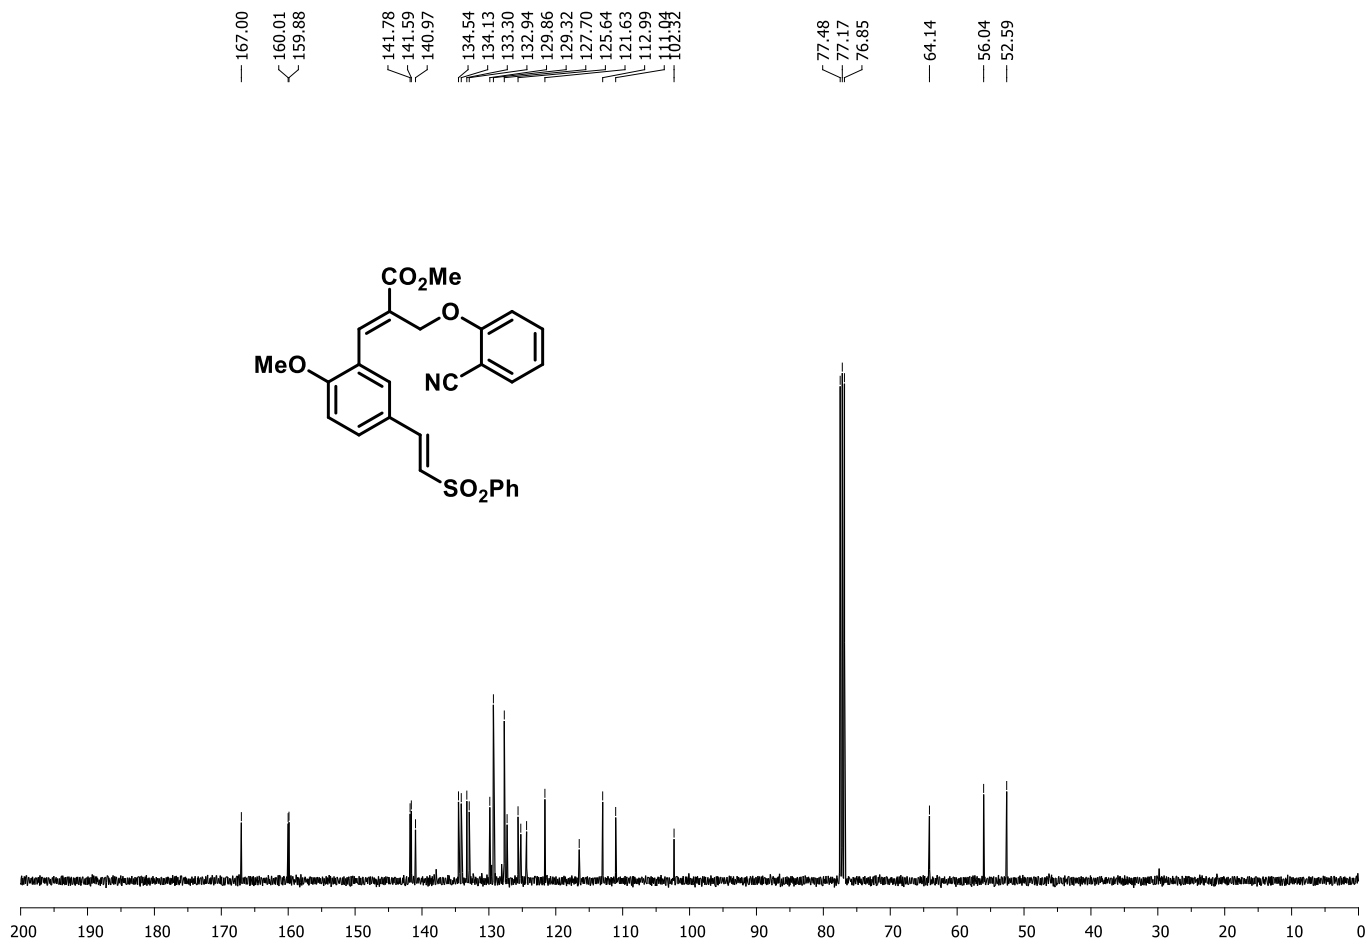

**Ethyl (E)-3-(5-((E)-3-(tert-butoxy)-3-oxoprop-1-en-1-yl)-2-methoxyphenyl)-2-((2-cyanophenoxy) methyl) acrylate (4q)**

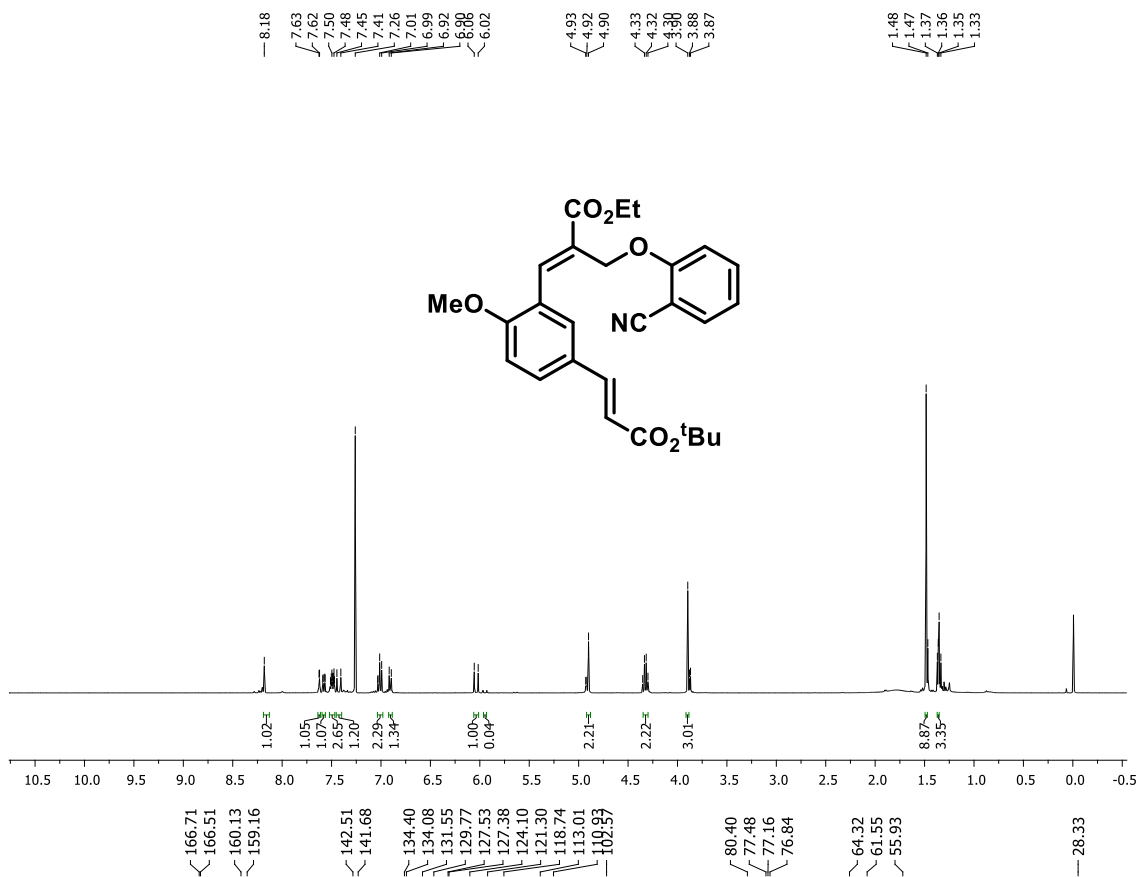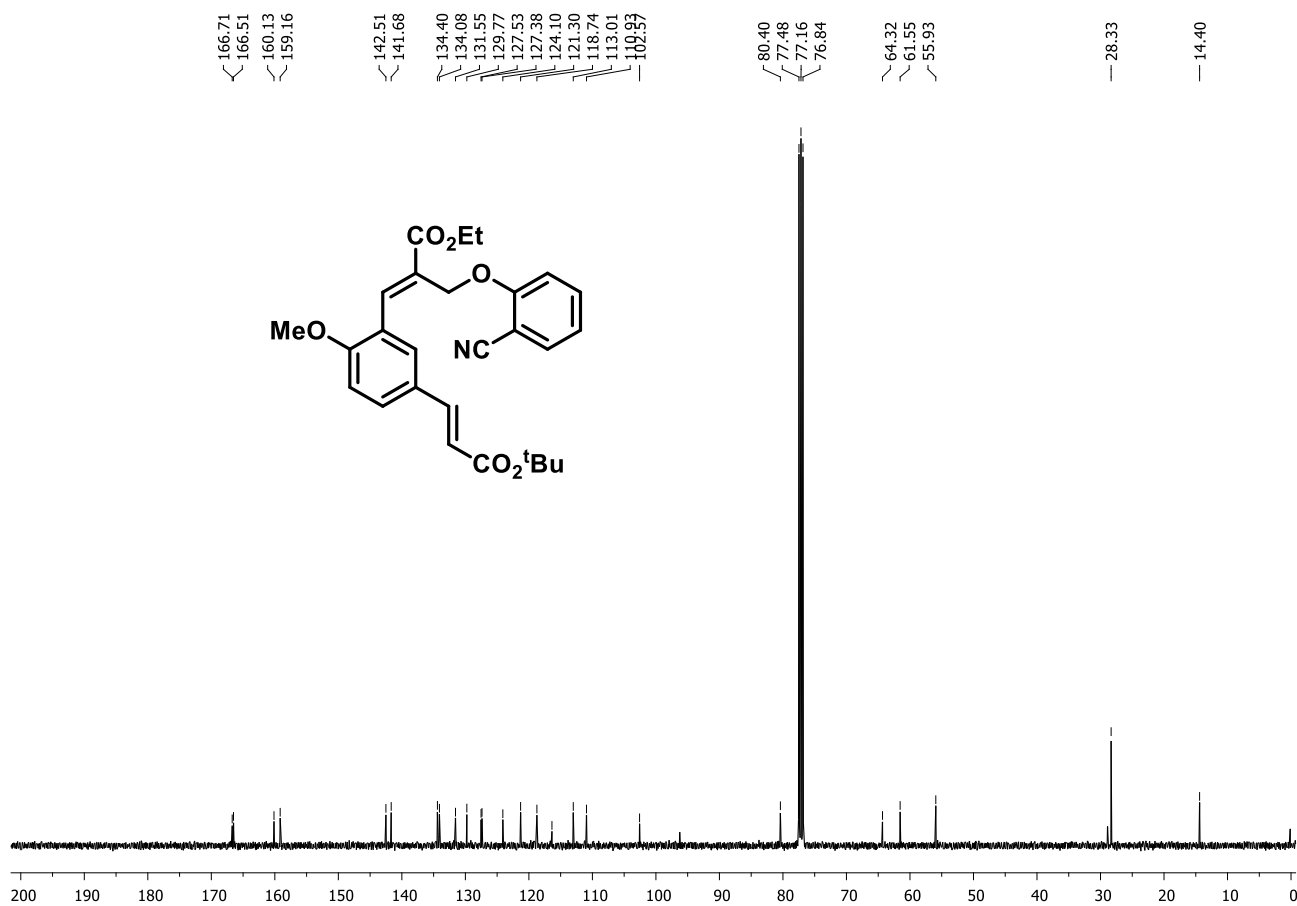

Ethyl(*E*)-2-((2-cyanophenoxy)methyl)-3-(2-methoxy-5-((*E*)-2-(phenylsulfonyl) vinyl)phenyl) acrylate (4r)

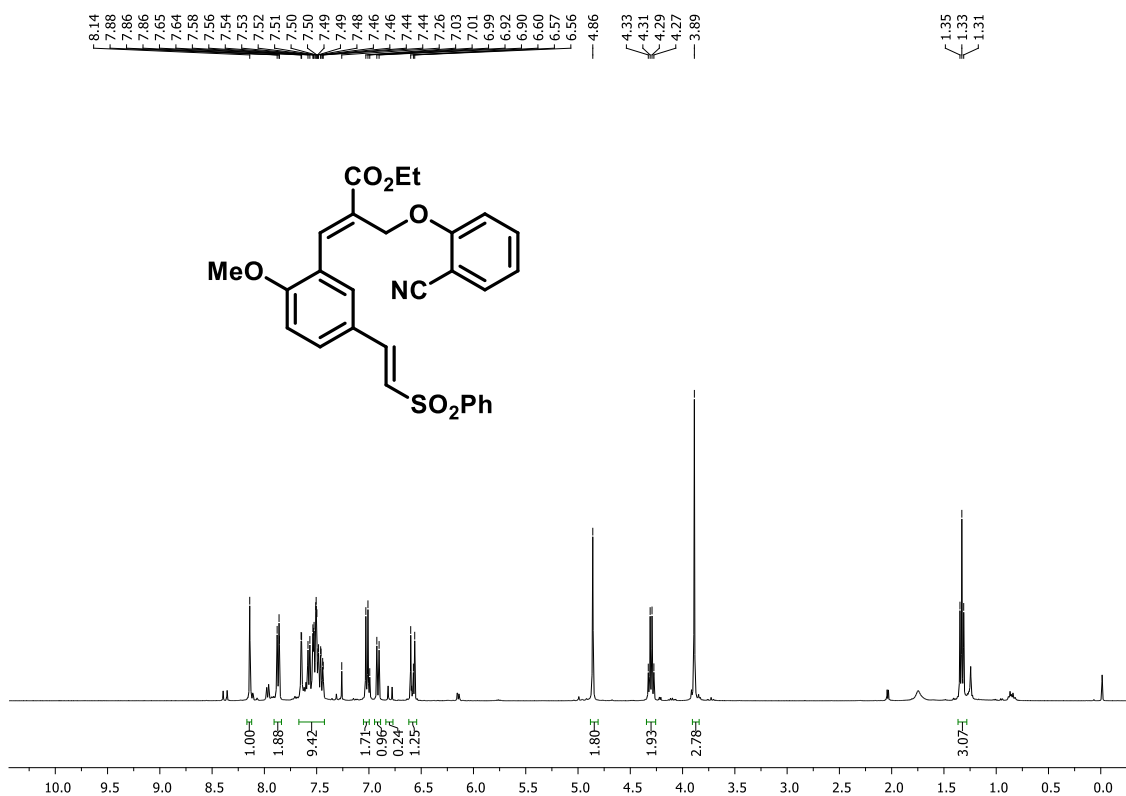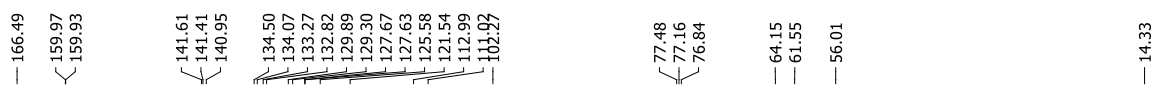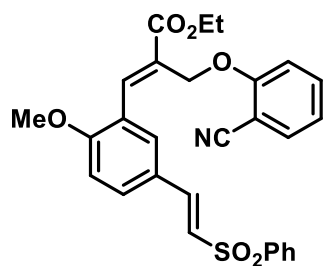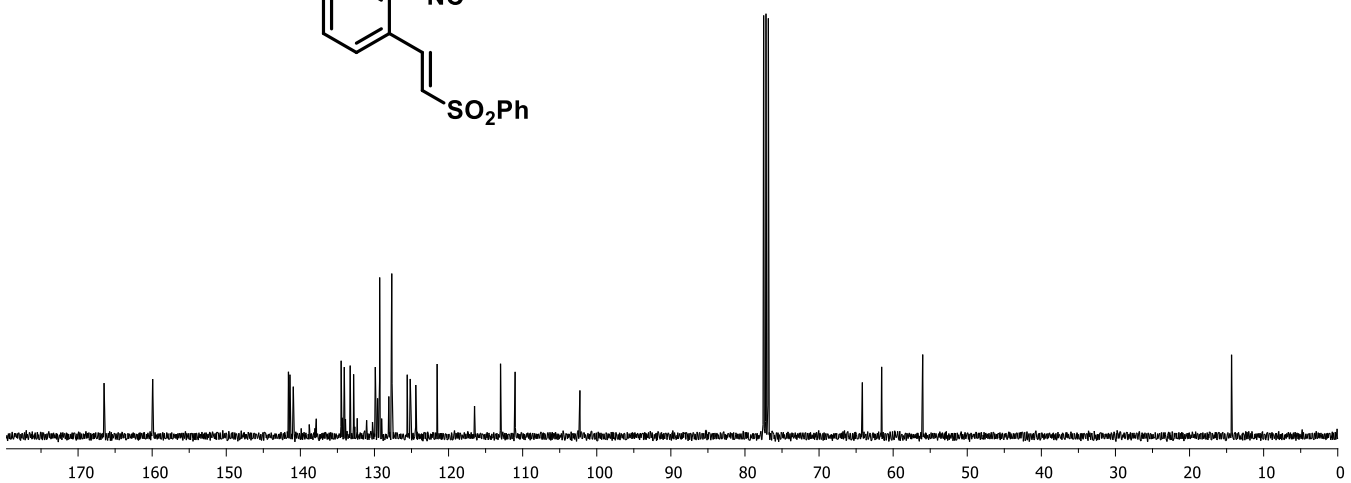

Methyl (*E*)-2-((2-cyanophenoxy)methyl)-3-(2-fluoro-5-((*E*)-2-(phenylsulfonyl)vinyl)phenyl) acrylate (4s)

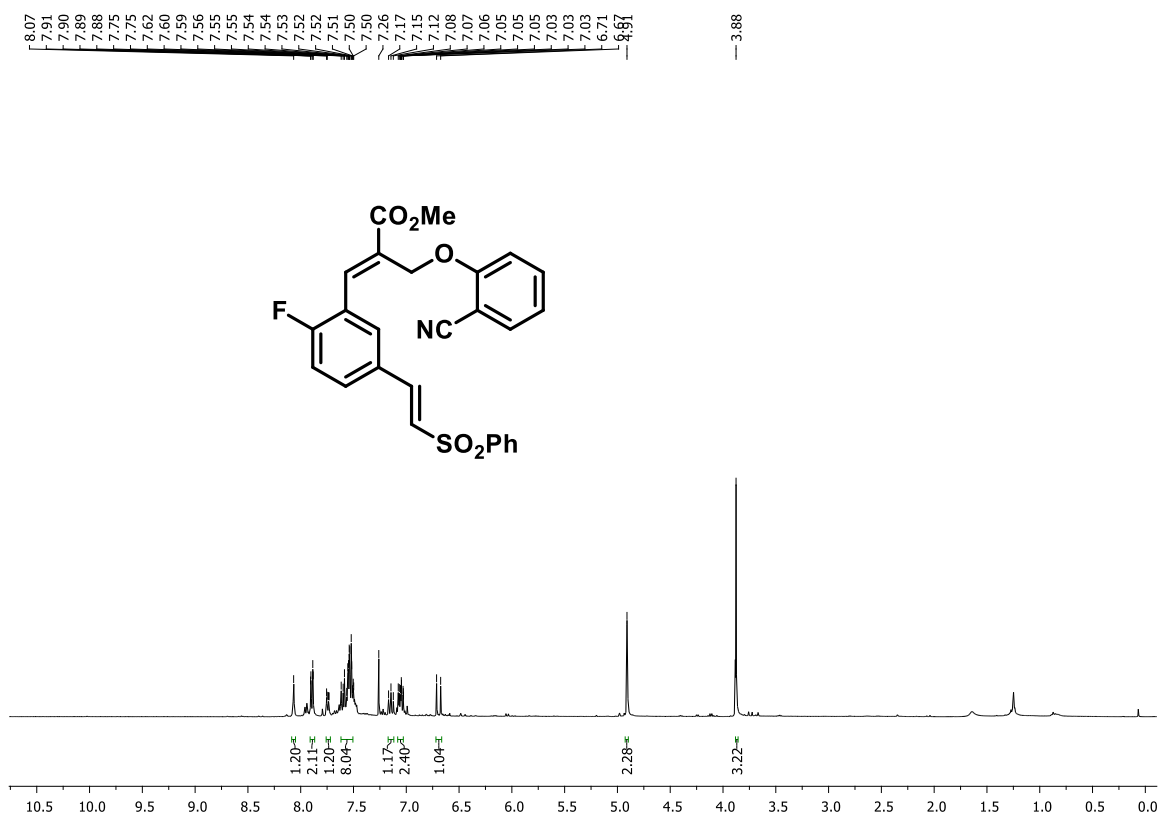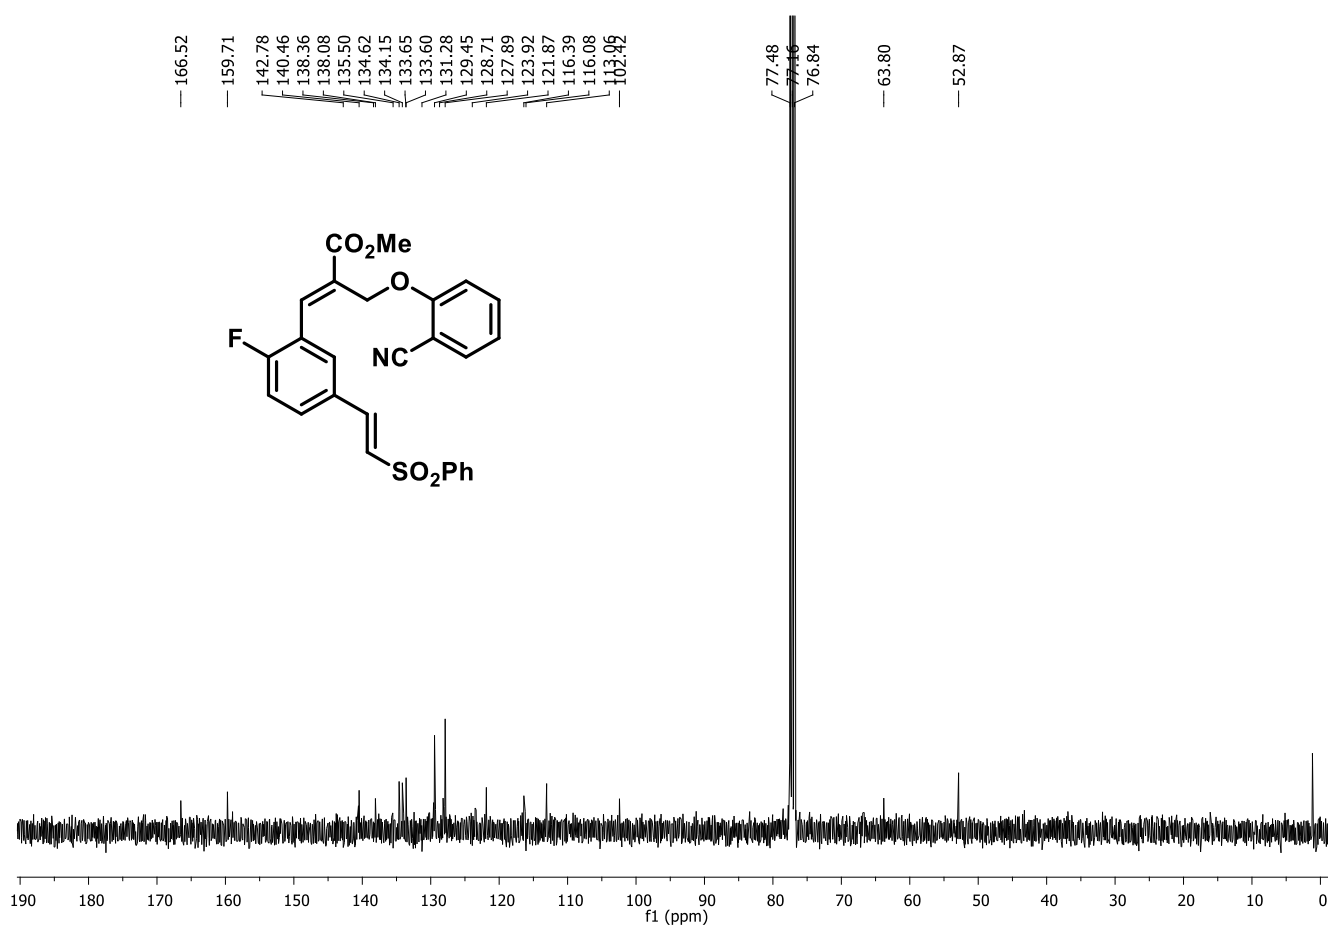



Methyl (*E*)-3-(2-chloro-5-((*E*)-3-methoxy-3-oxoprop-1-en-1-yl) phenyl)-2-((2-cyanophenoxy) methyl) acrylate (**4t**)

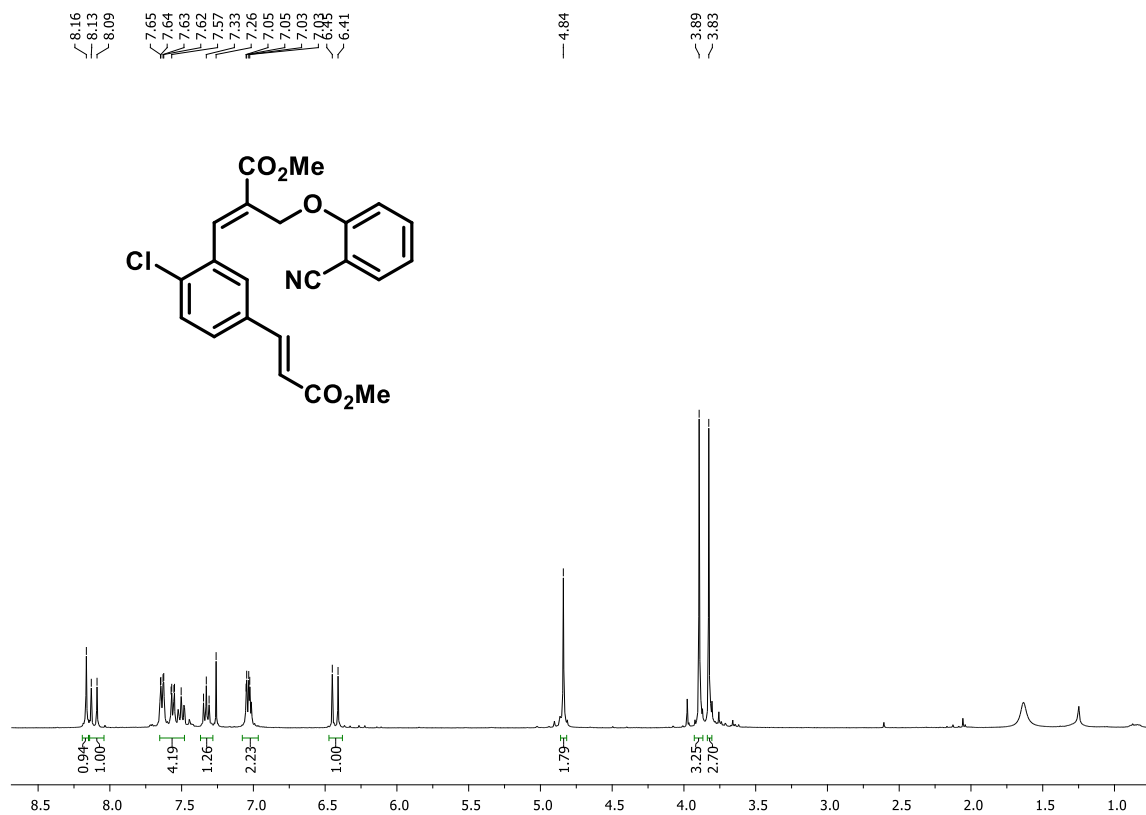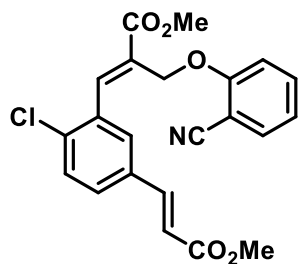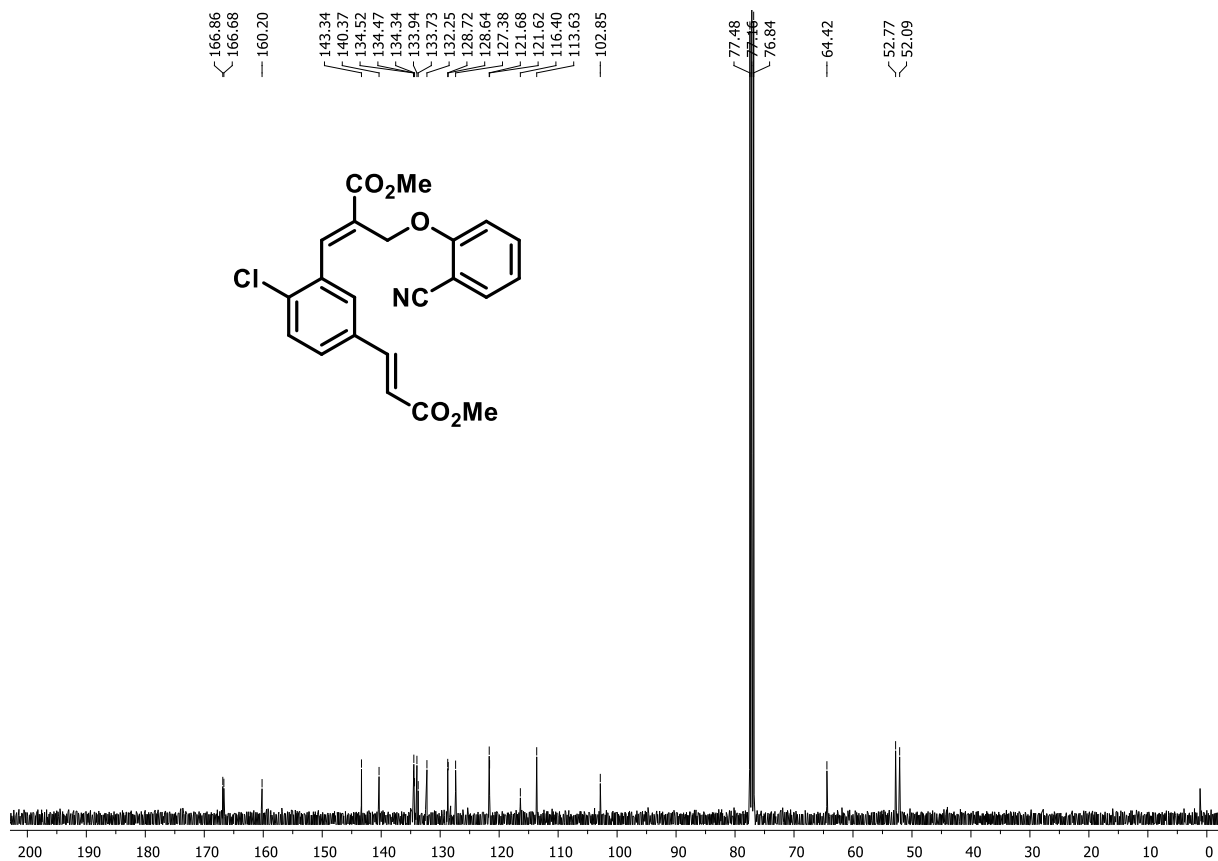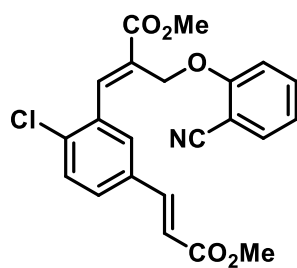

Methyl (E)-2-((2-cyanophenoxy)methyl)-3-(3-((E)-3-ethoxy-3-oxoprop-1-en-1-yl)-4-methylphenyl)acrylate (4u)

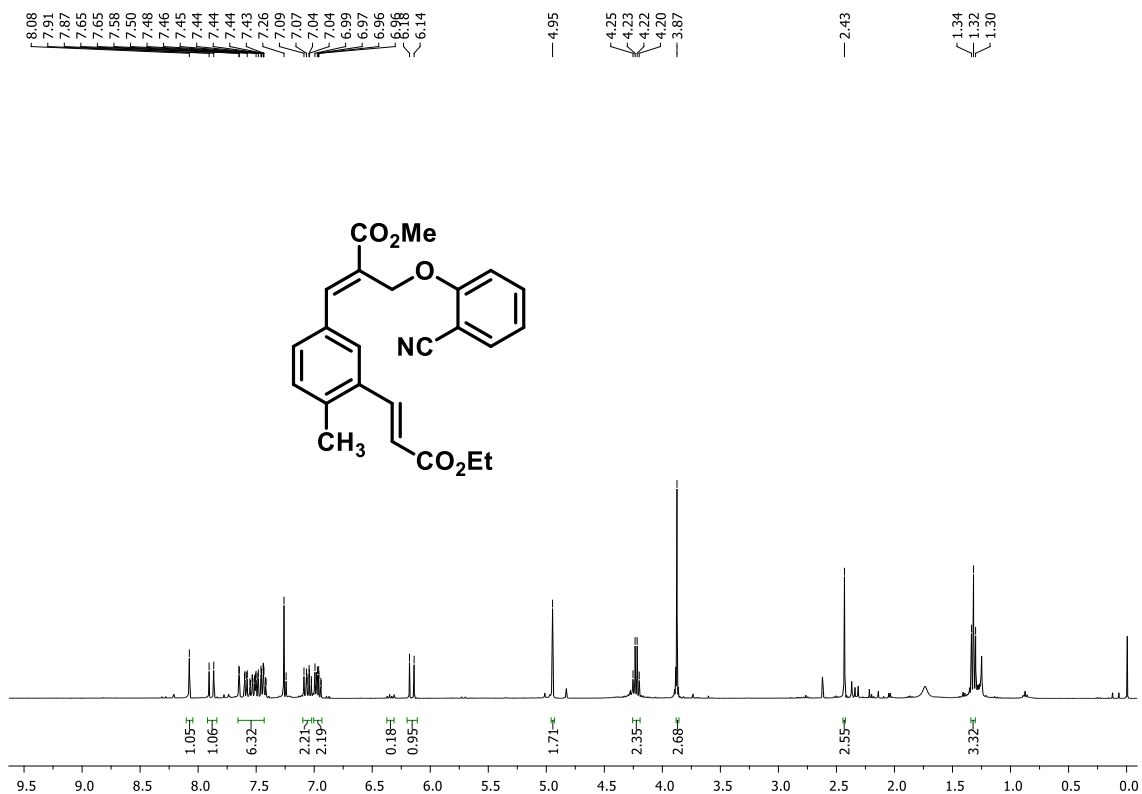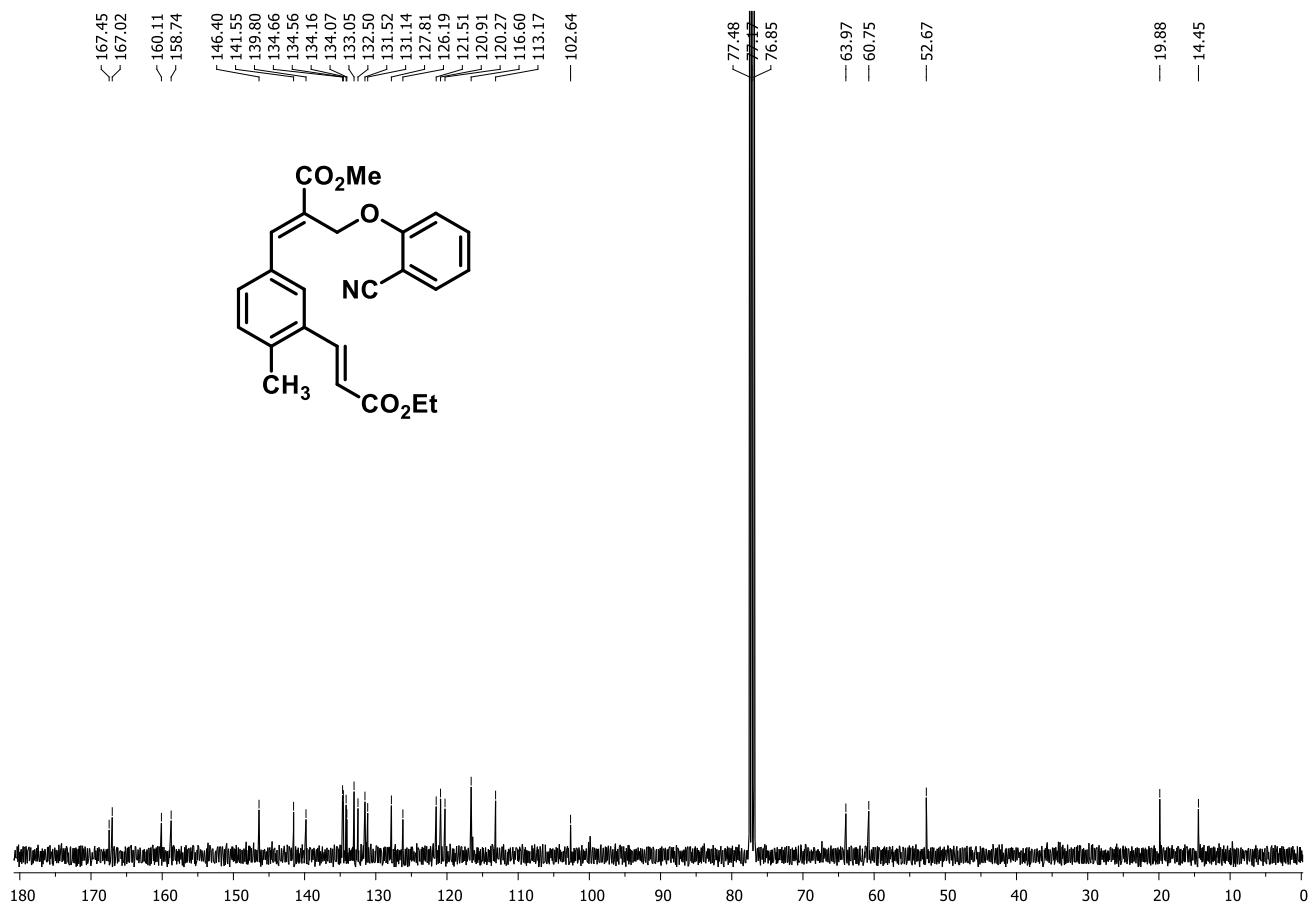

Methyl *(E)*-2-((2-cyanophenoxy)methyl)-3-(4-ethyl-3-((*E*)-3-methoxy-3-oxoprop-1-en-1-yl)phenyl)acrylate (4v)

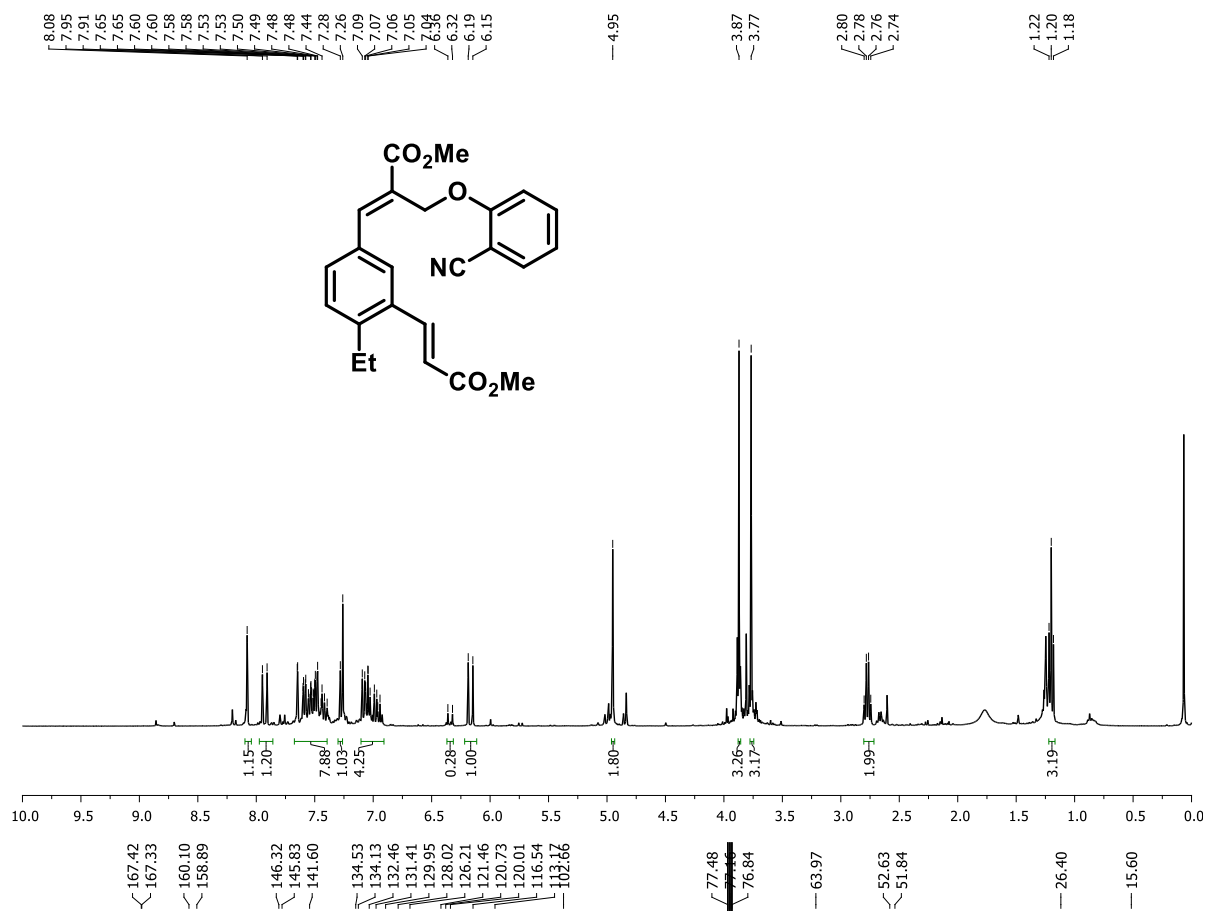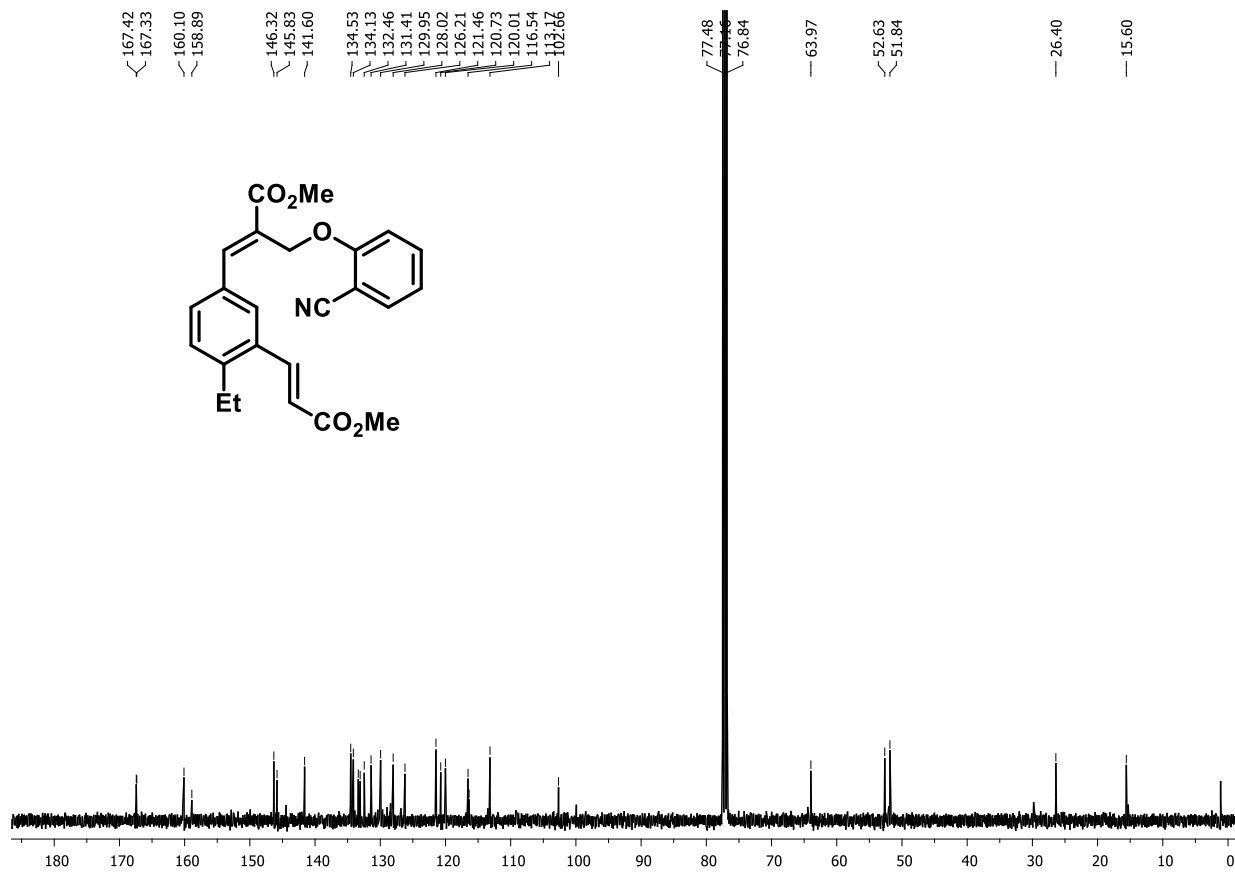

Methyl (*E*)-2-((2-cyanophenoxy)methyl)-3-(3-((*E*)-3-ethoxy-3-oxoprop-1-en-1-yl)-4-methoxyphenyl)acrylate (4w)

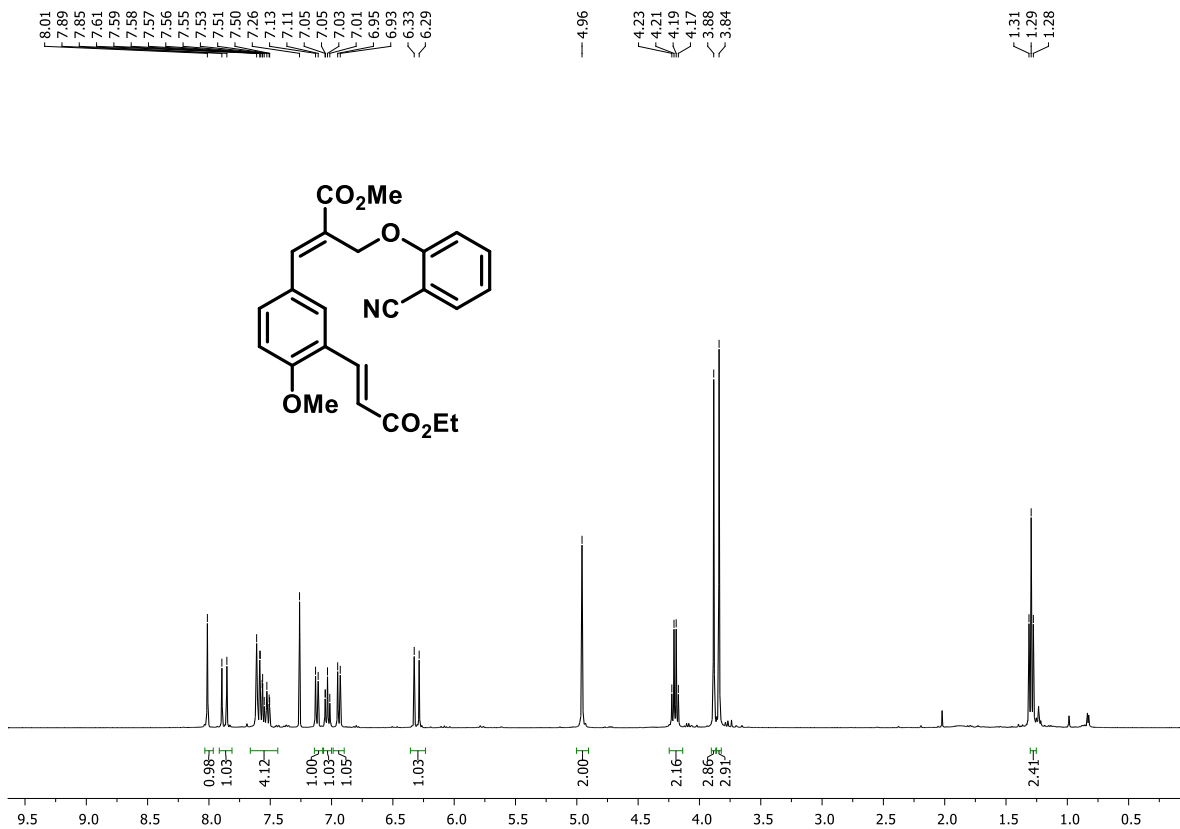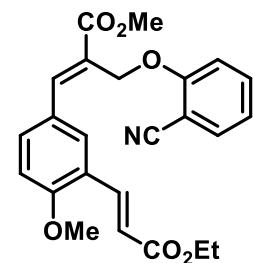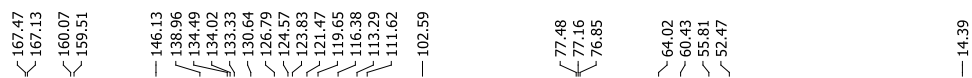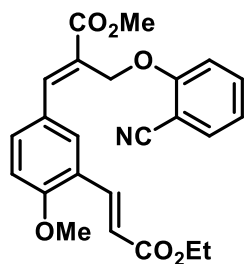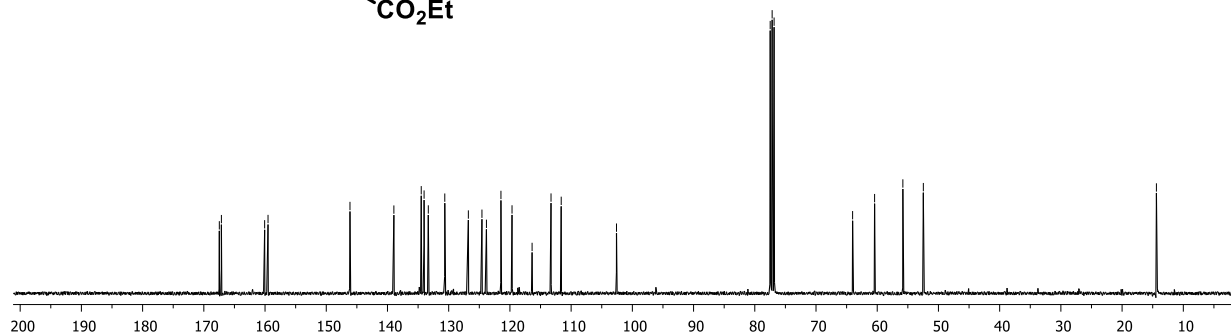

Methyl (*E*)-2-((2-cyanophenoxy) methyl)-3-(7-((*E*)-3-methoxy-3-oxoprop-1-en-1-yl) benzo[d][1,3]dioxol-5-yl)acrylate (4x)

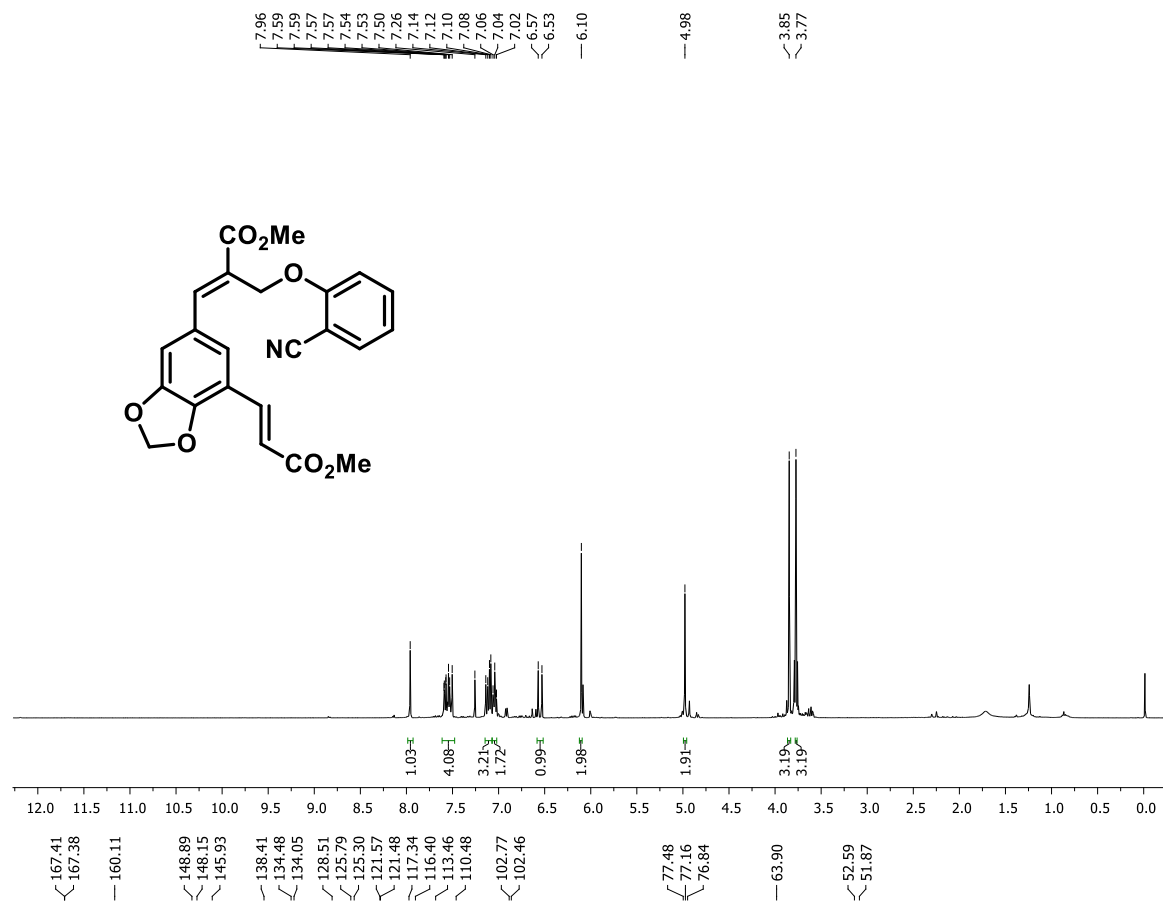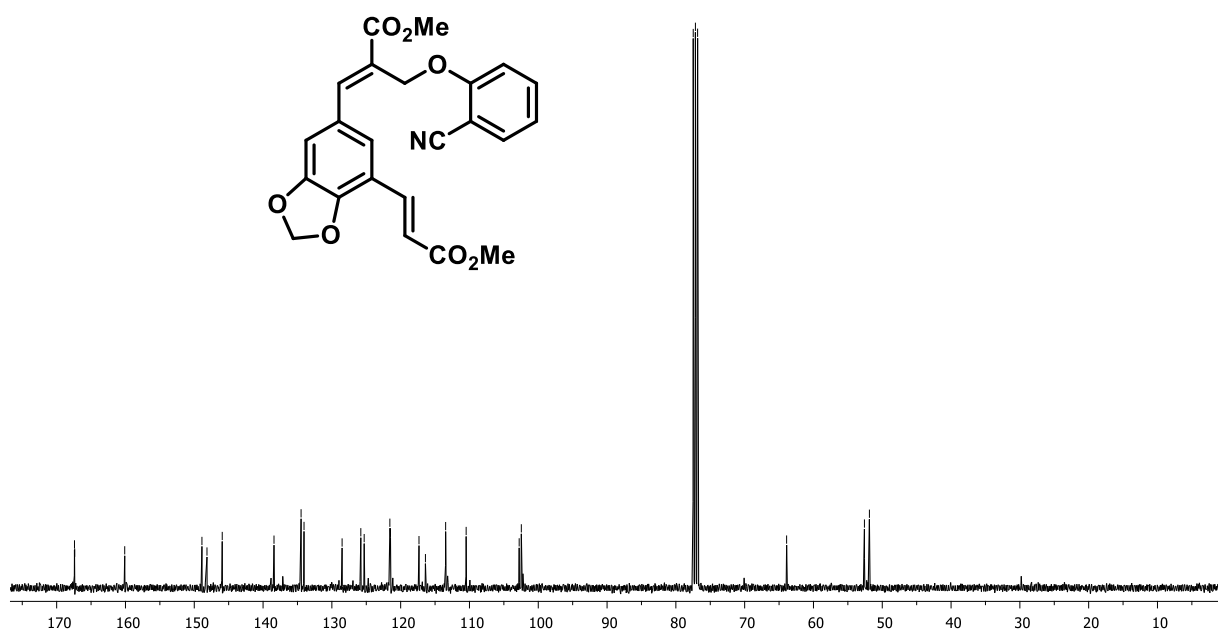

**Methyl (*E*)-2-((2-cyanophenoxy) methyl)-3-(7-((*E*)-3-ethoxy-3-oxoprop-1-en-1-yl) benzo[d][1,3]dioxol-5-yl) acrylate (4y)**

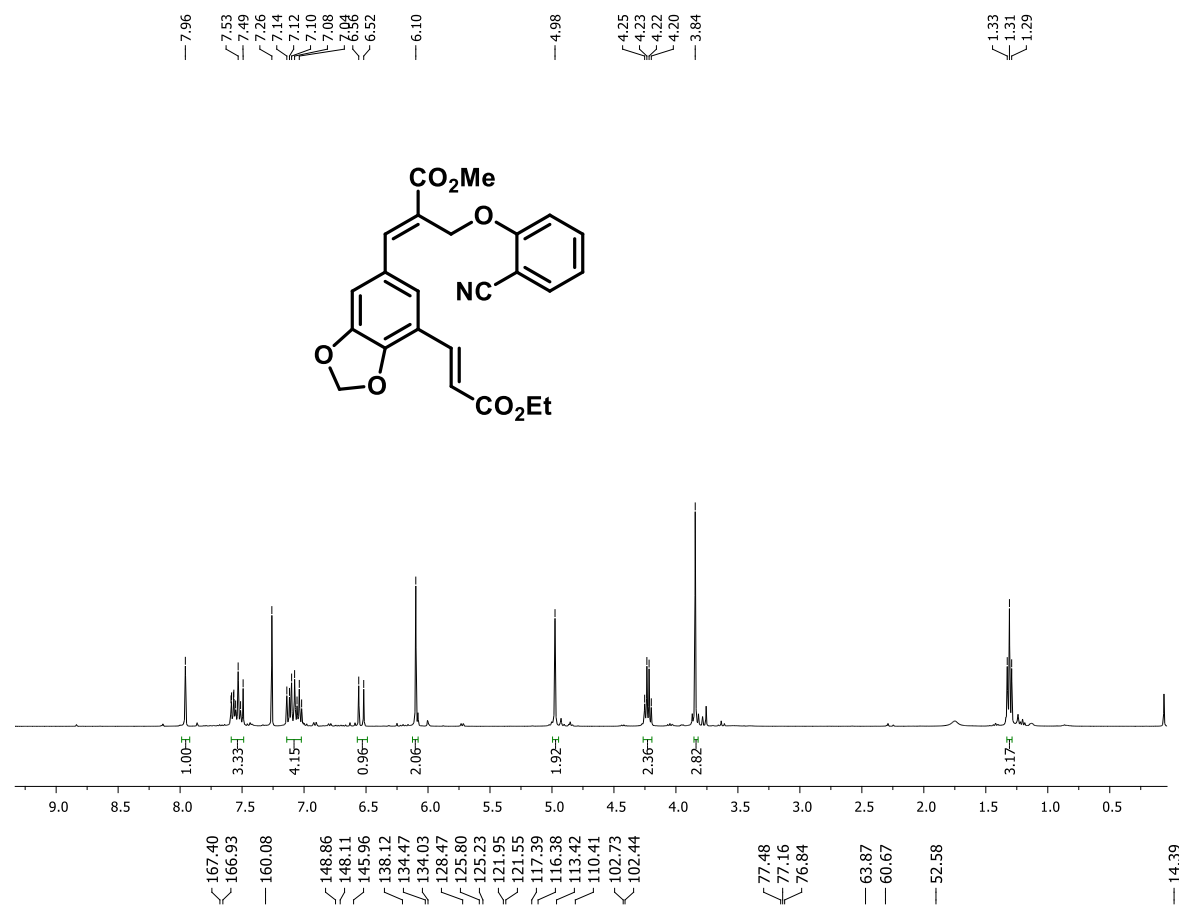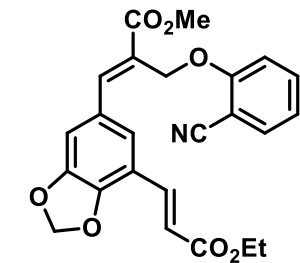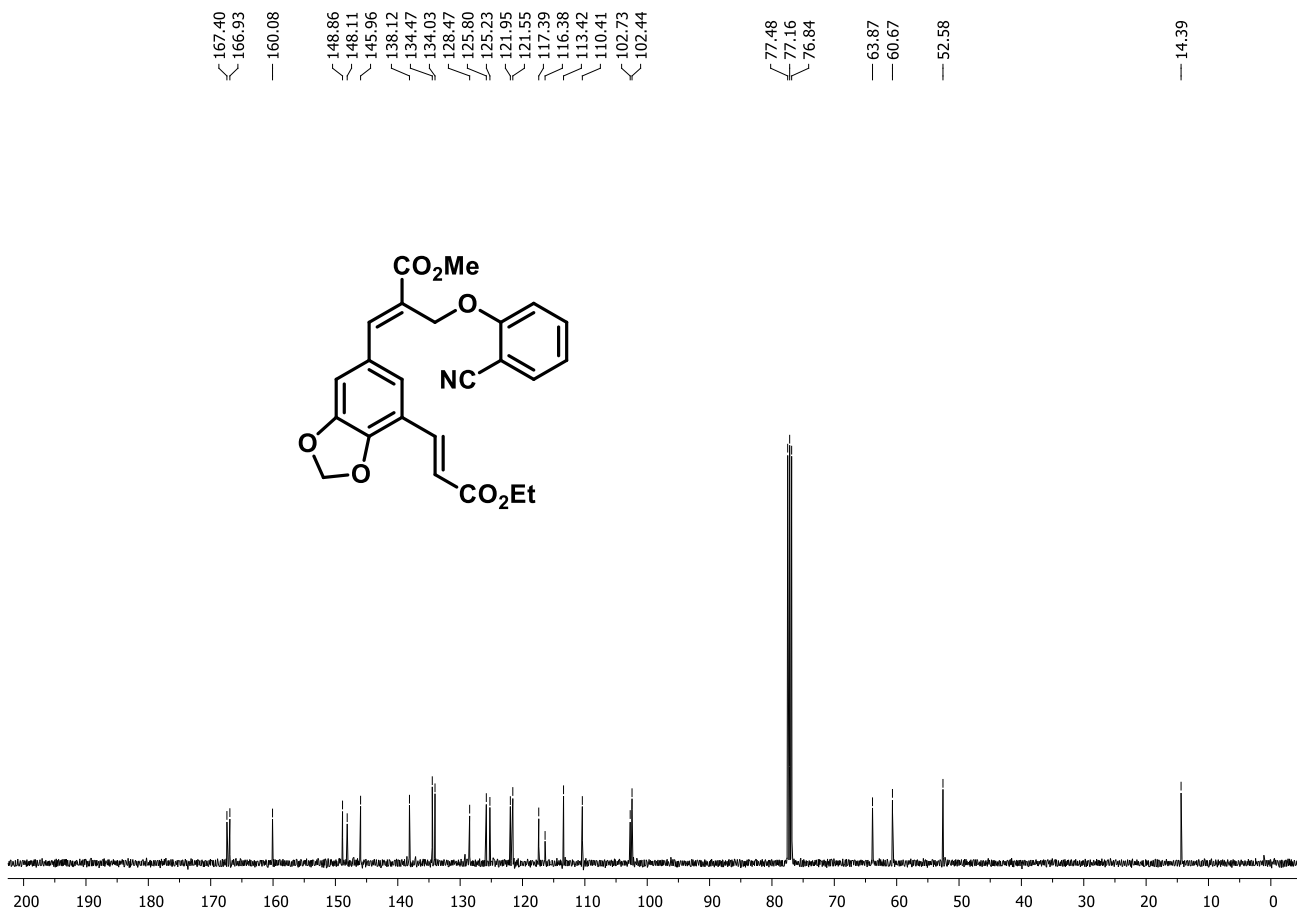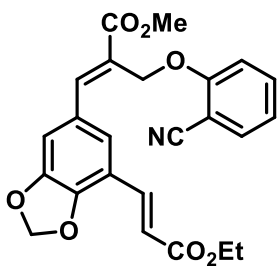

**Methyl (E)-3-(7-((E)-3-(tert-butoxy)-3-oxoprop-1-en-1-yl) benzo[d][1,3]dioxol-5-yl)-2-((2-cyanophenoxy)methyl) acrylate (4z)**

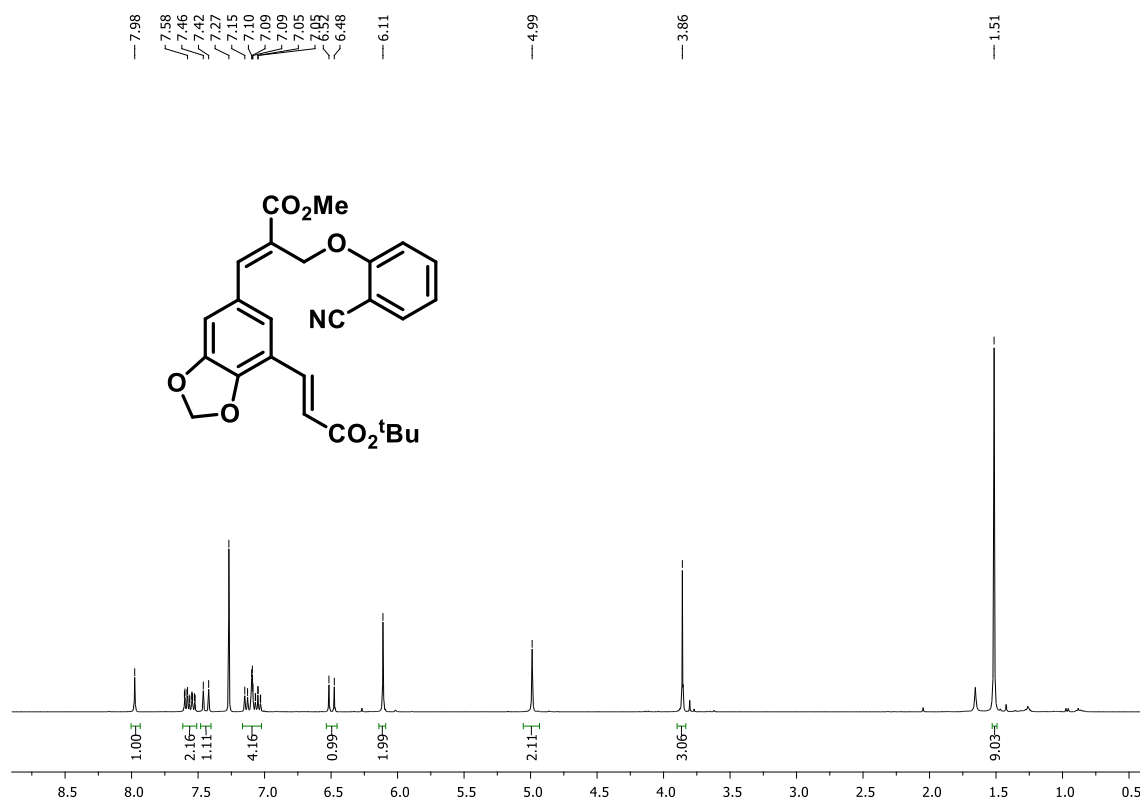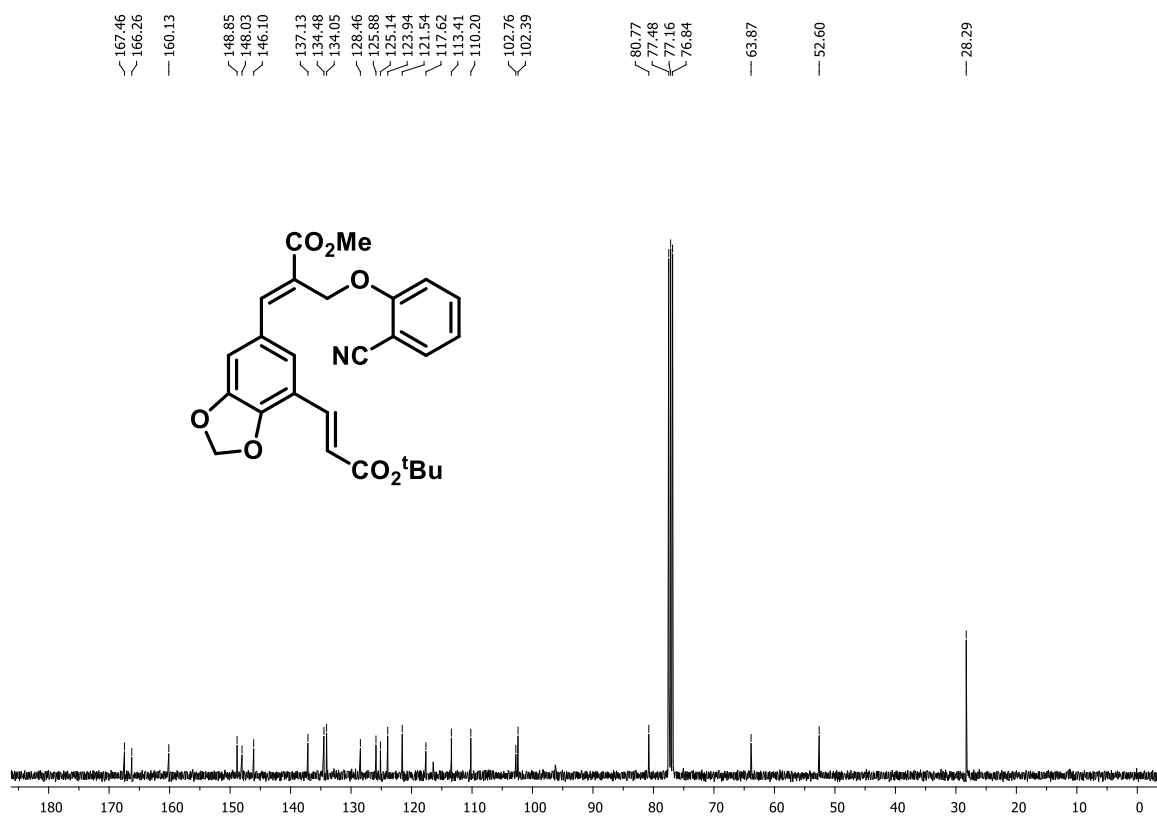

Methyl (E)-2-((2-cyanophenoxy)methyl)-3-(4-fluoro-3-((E)-3-methoxy-3-oxoprop-1-en-1-yl)phenyl)acrylate (4aa)

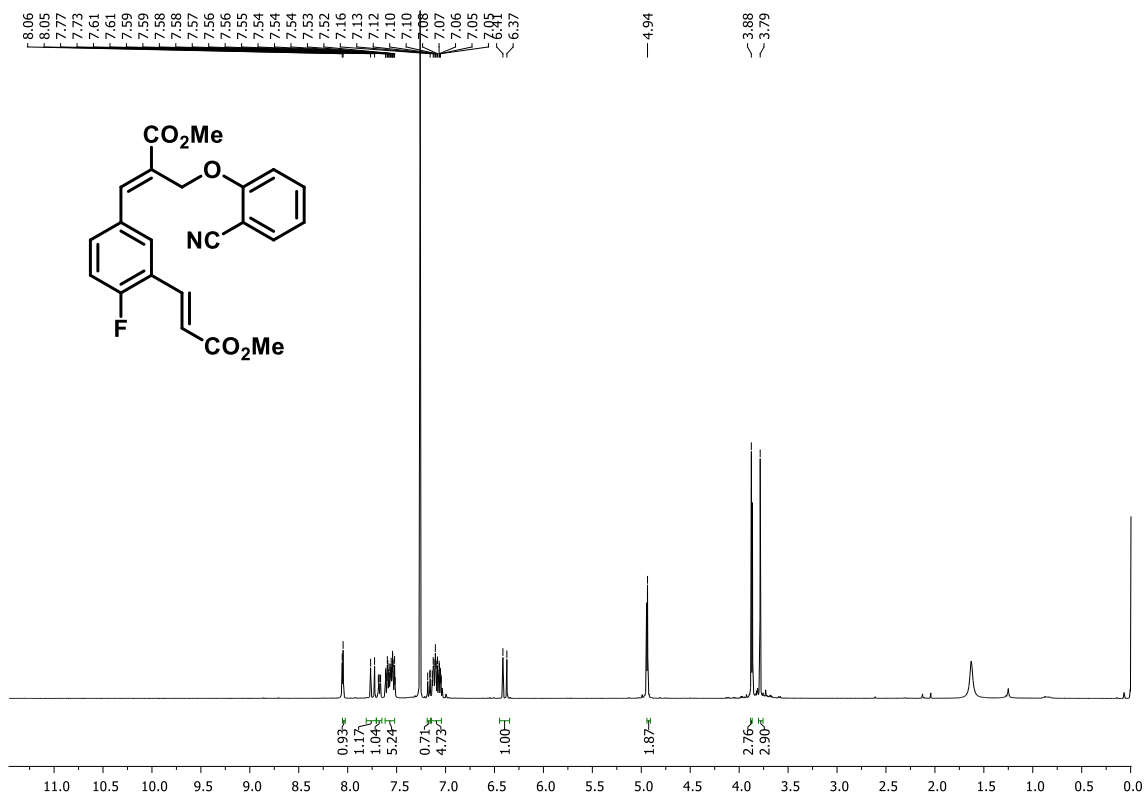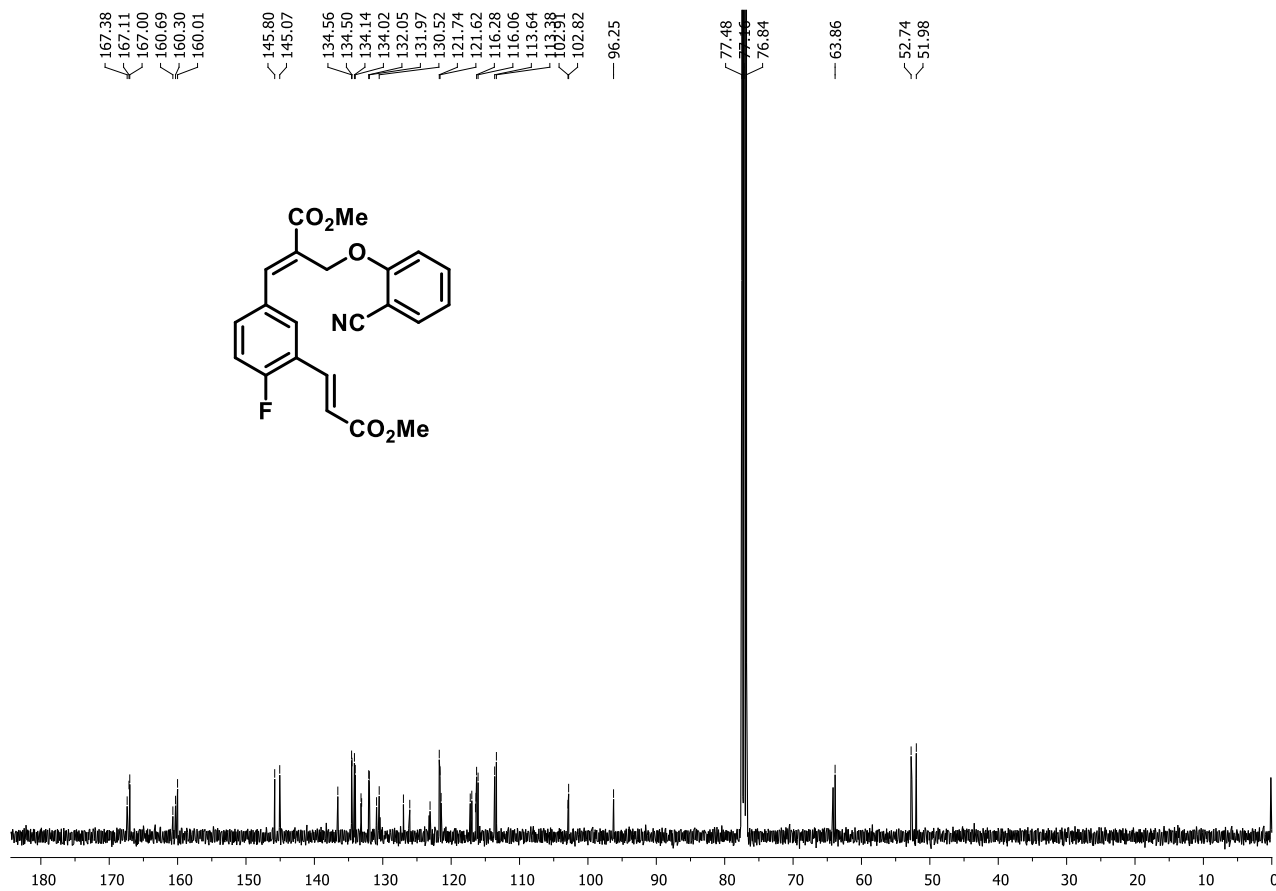



Methyl (*E*)-3-(4-chloro-3-((*E*)-3-methoxy-3-oxoprop-1-en-1-yl)phenyl)-2-((2-cyanophenoxy)methyl)acrylate (4ab)

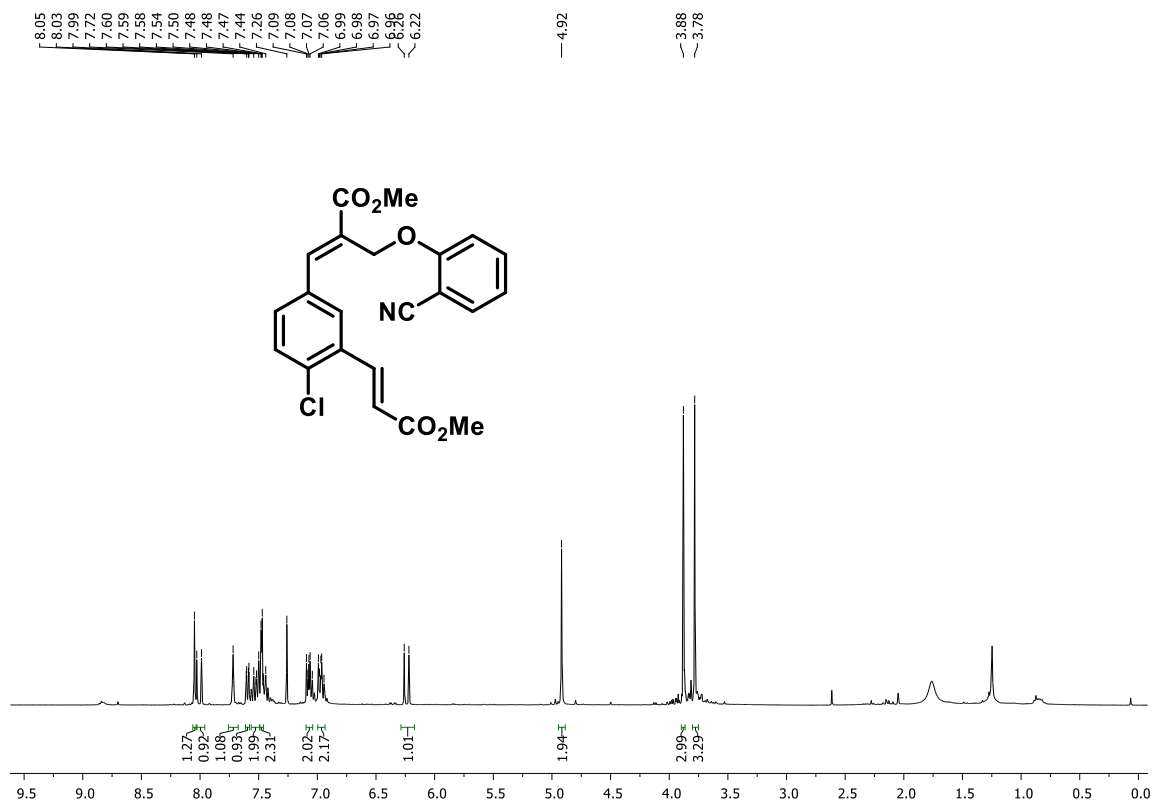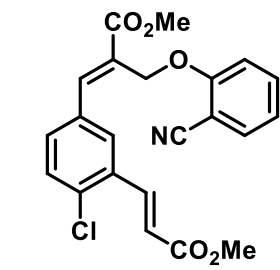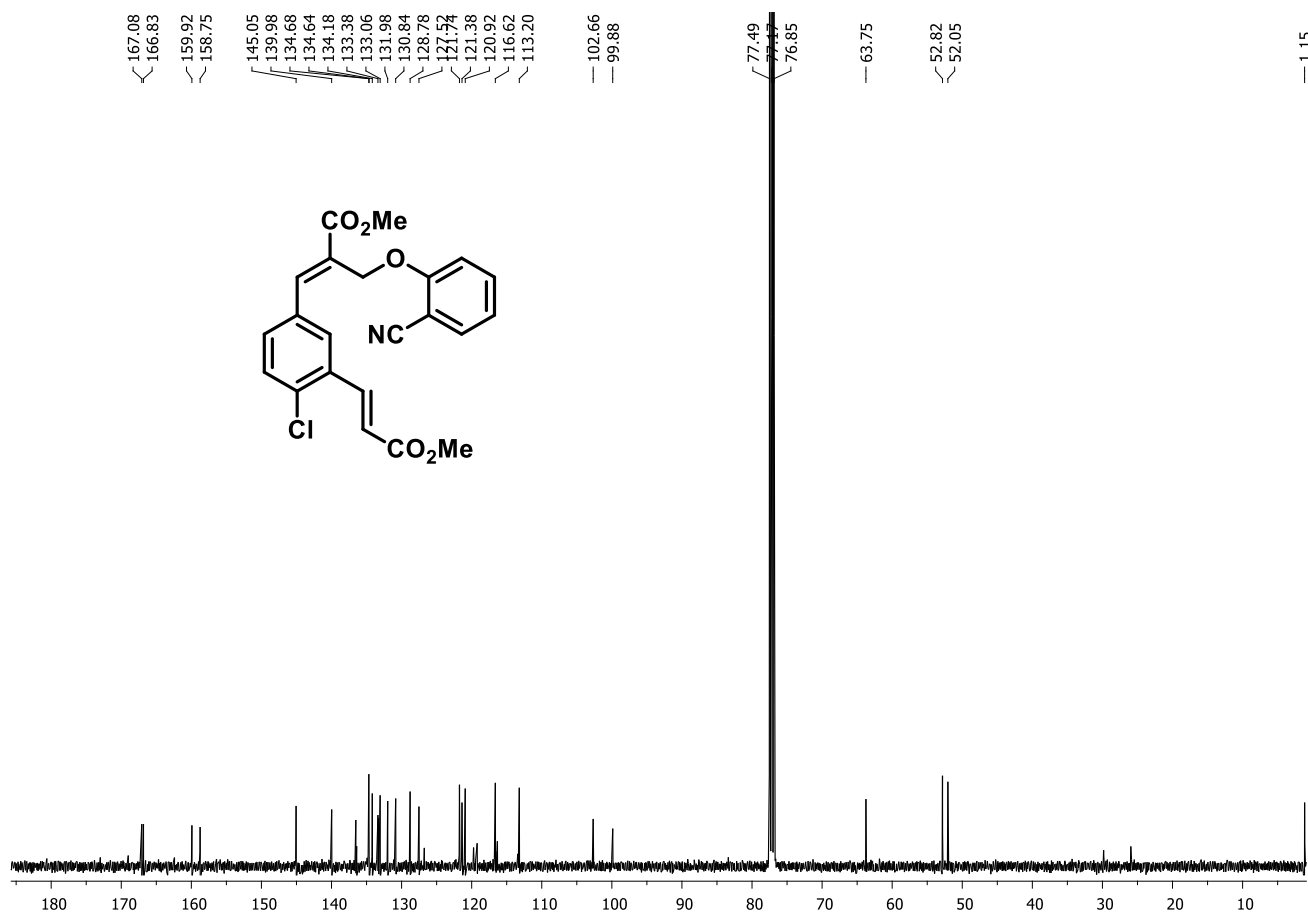

Methyl (*E*)-3-(4-chloro-3-((*E*)-3-ethoxy-3-oxoprop-1-en-1-yl) phenyl)-2-((2-cyanophenoxy) methyl) acrylate (**4ac**)

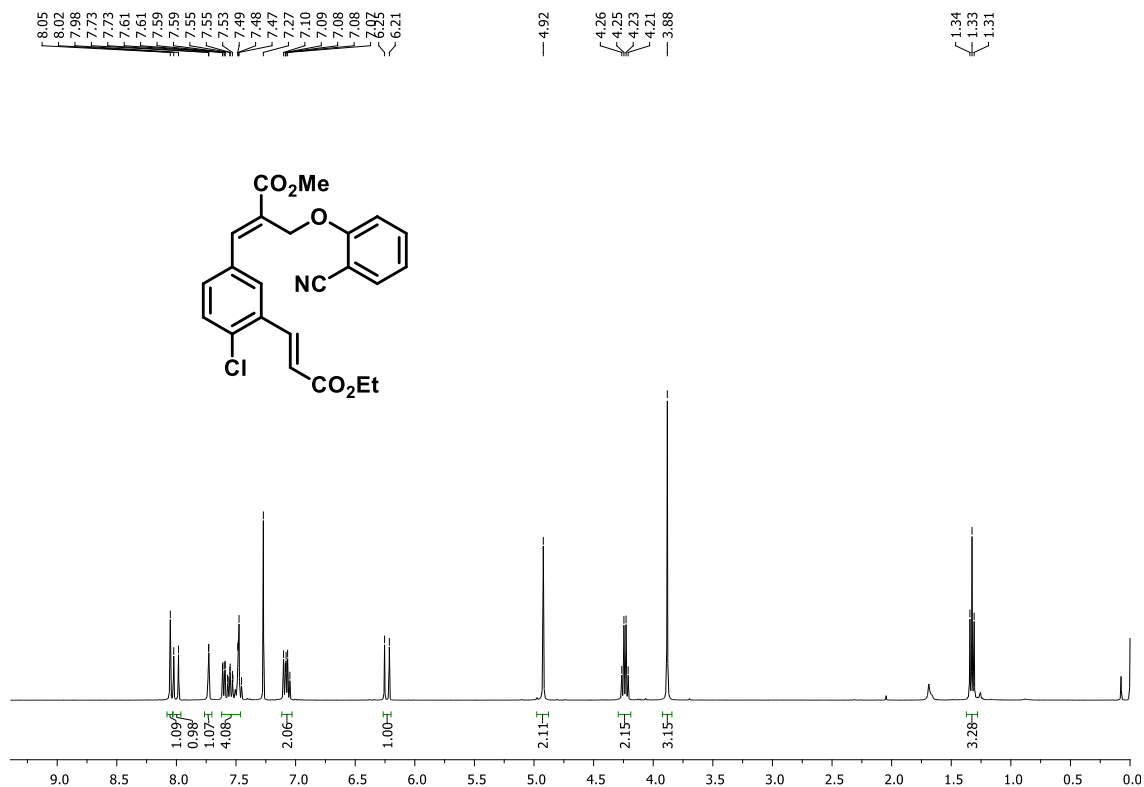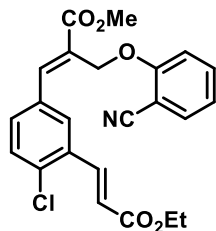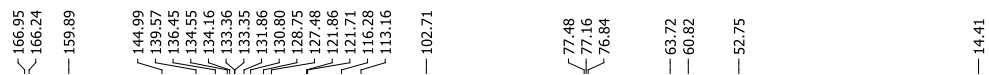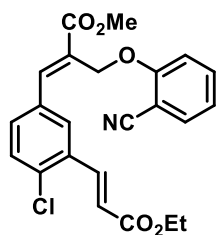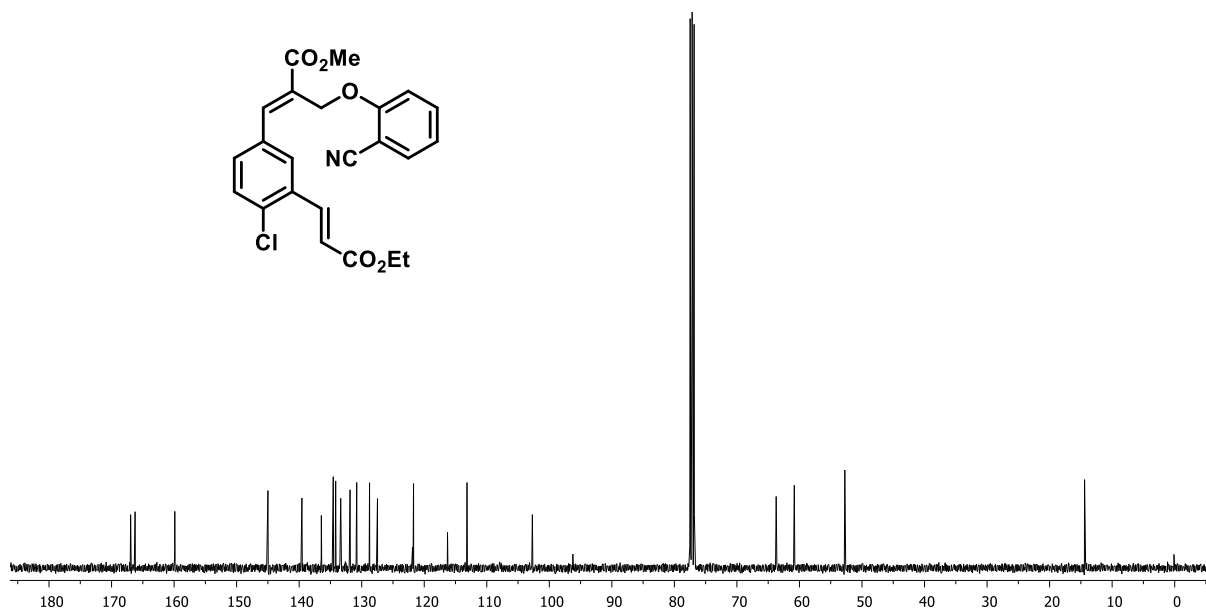

**Methyl (*E*)-3-(4-chloro-3-((*E*)-2-(phenylsulfonyl) vinyl) phenyl)-2-((2-cyanophenoxy) methyl) acrylate (4ad)**

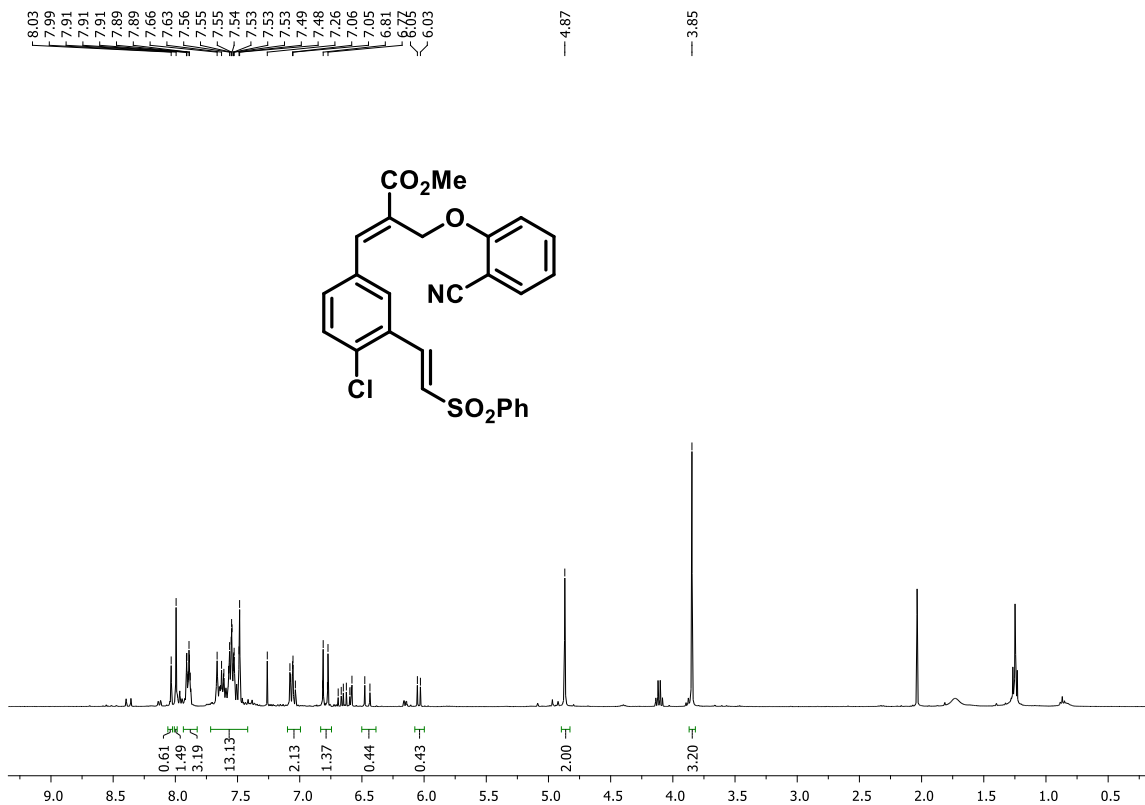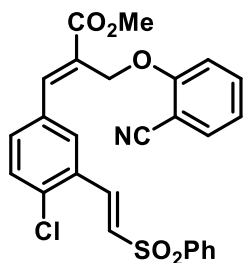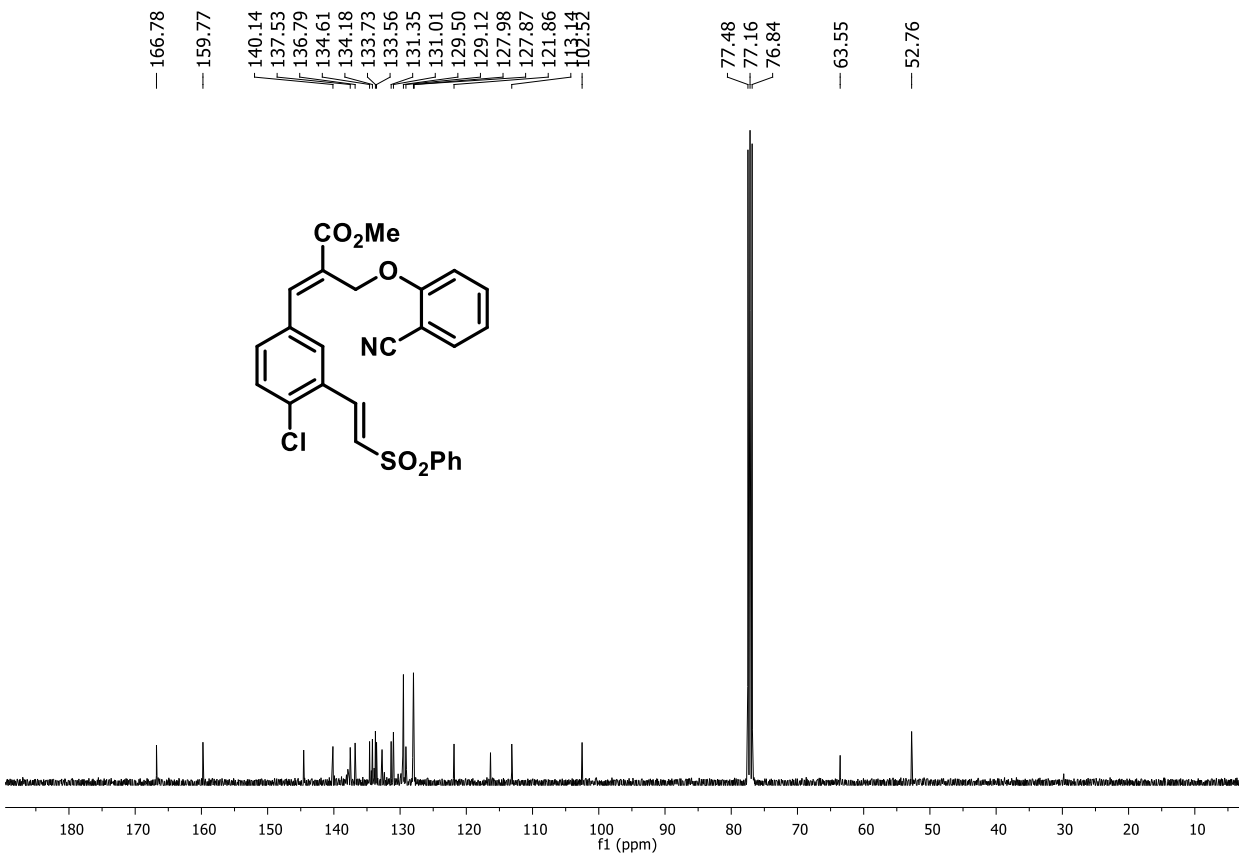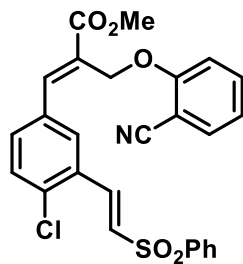

Methyl (E)-3-(4-bromo-3-((E)-3-methoxy-3-oxoprop-1-en-1-yl)phenyl)-2-((2-cyanophenoxy)methyl)acrylate (4ae)

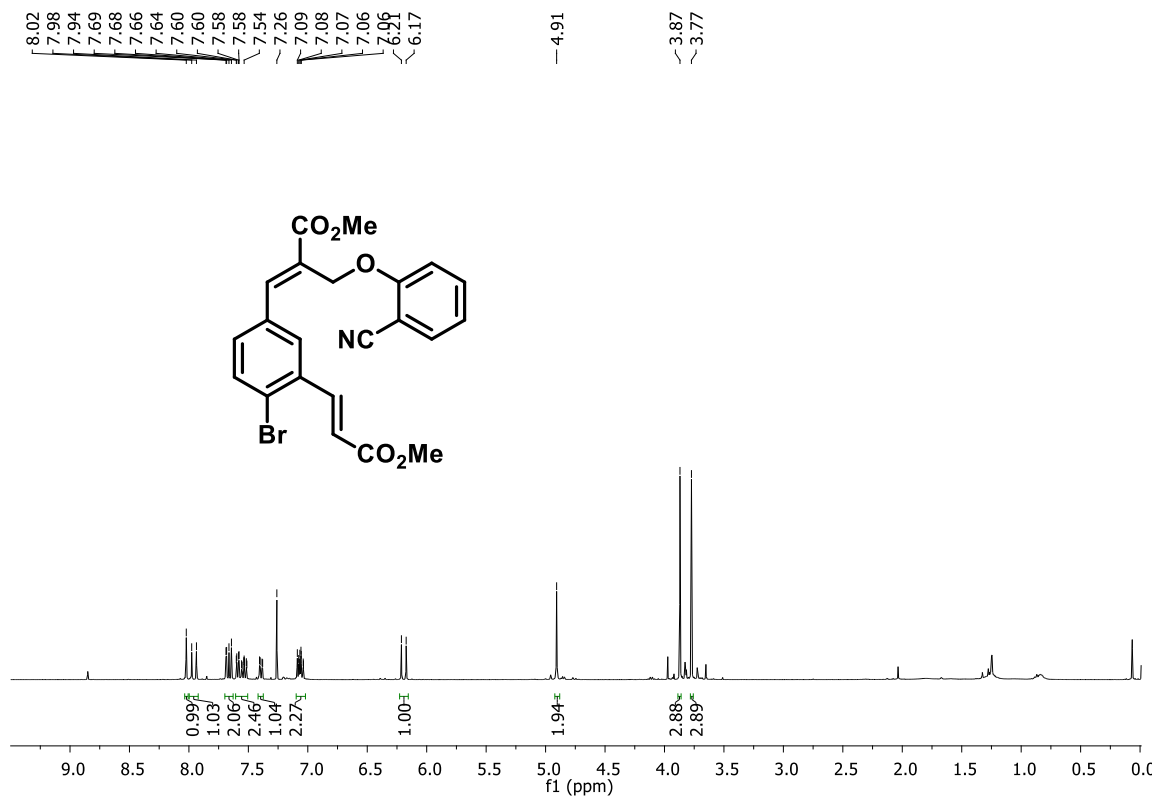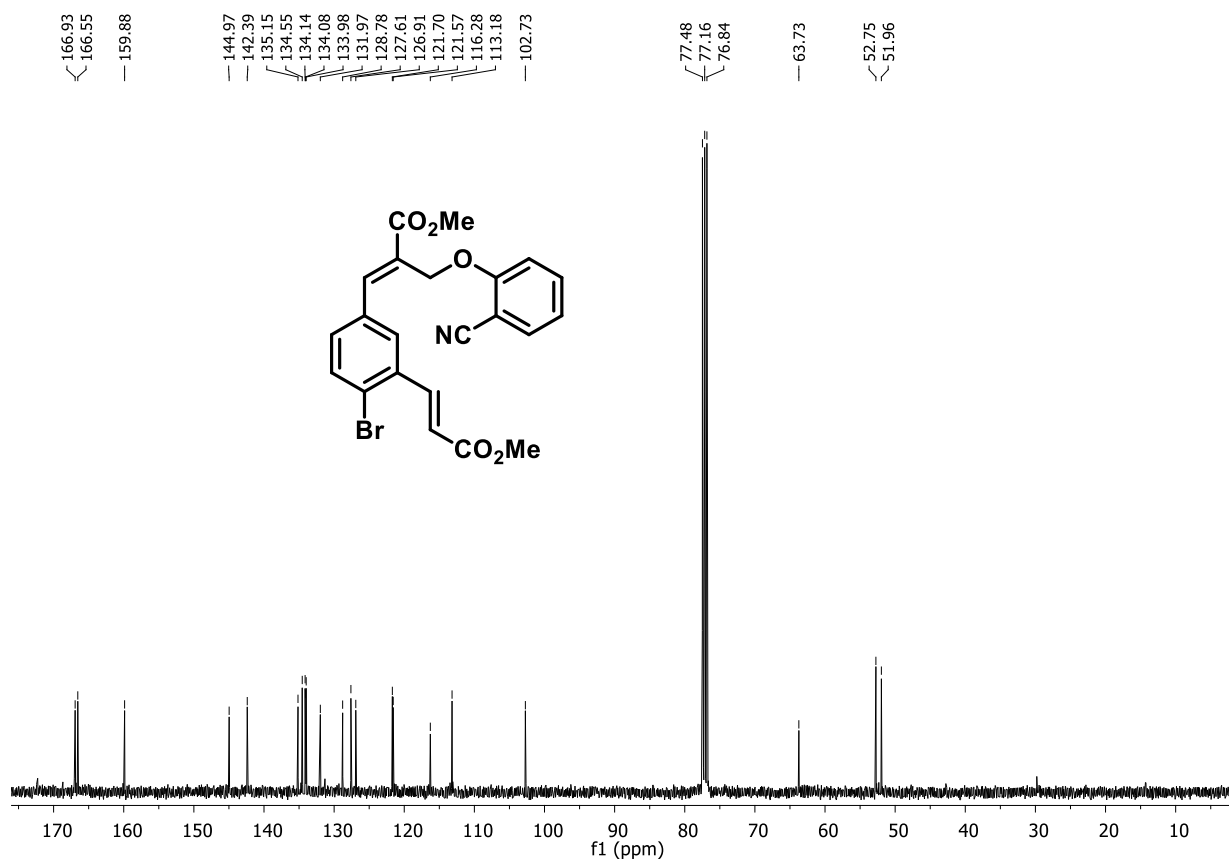

**Dimethyl 3,3'-(4-((E)-2-((2-cyanophenoxy)methyl)-3-methoxy-3-oxoprop-1-en-1-yl)-1,2-phenylene)(2E,2'E) diacrylate (4ae')**

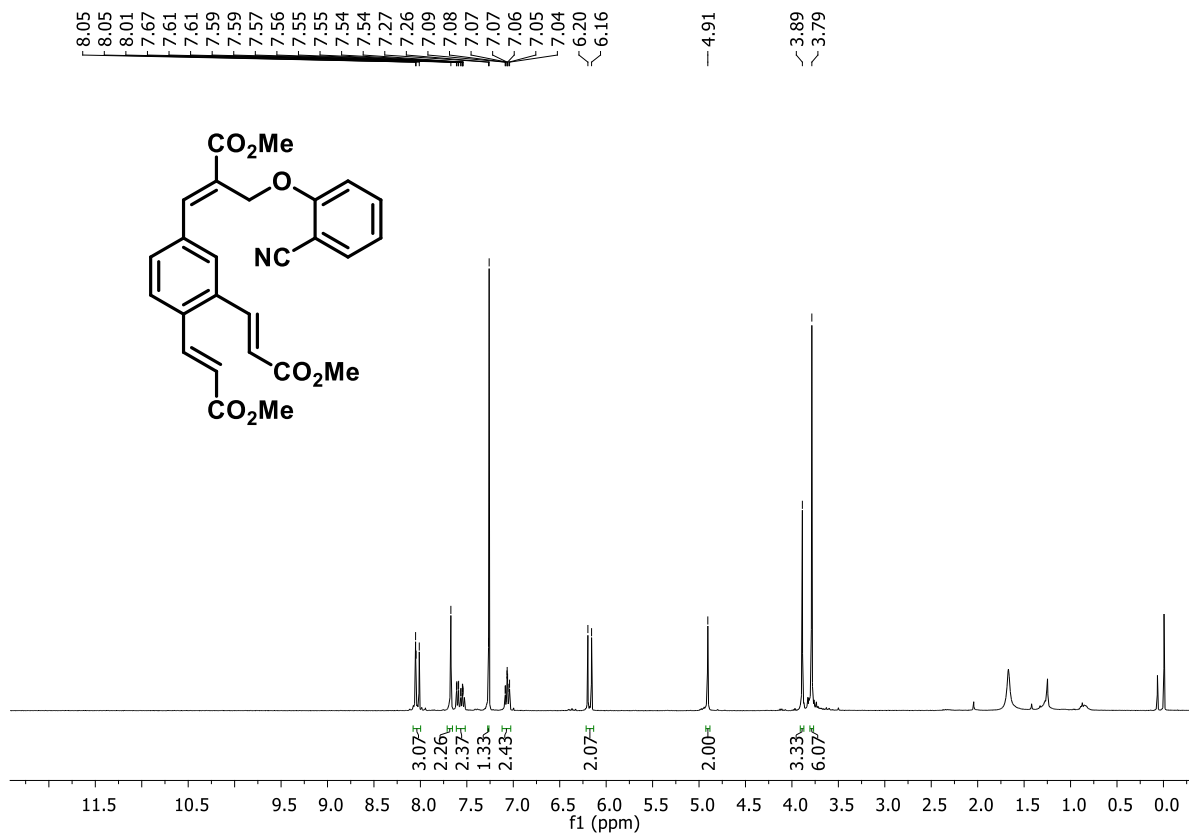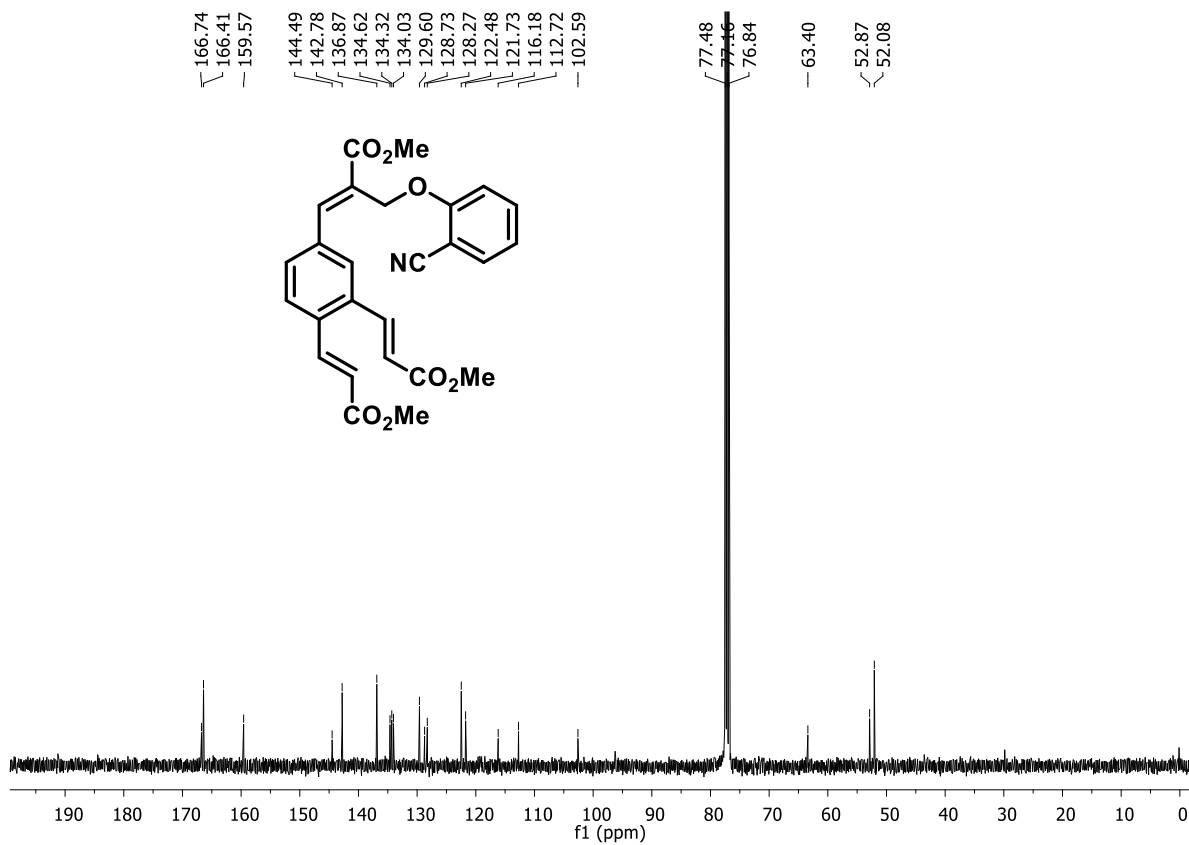

Methyl (E)-3-(2-bromo-5-((E)-3-methoxy-3-oxoprop-1-en-1-yl)phenyl)-2-((2-cyanophenoxy)methyl) acrylate (4af)

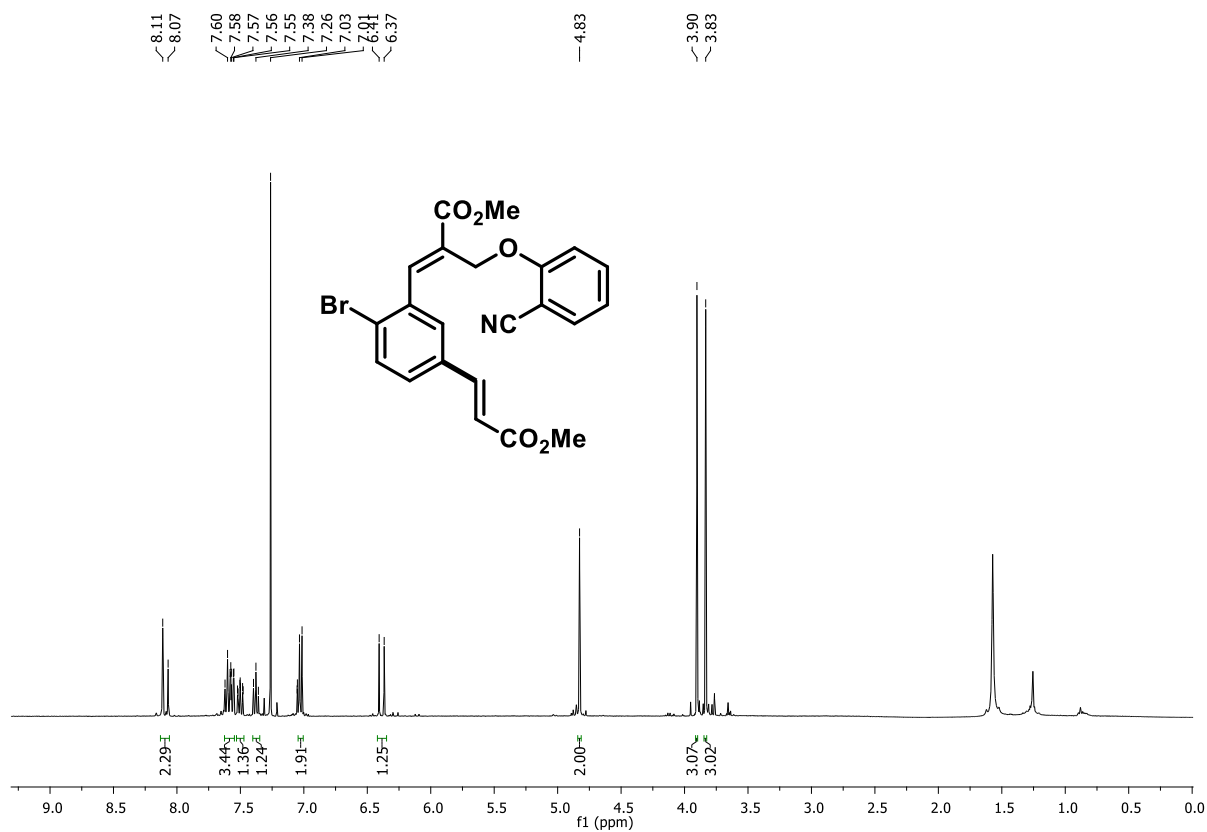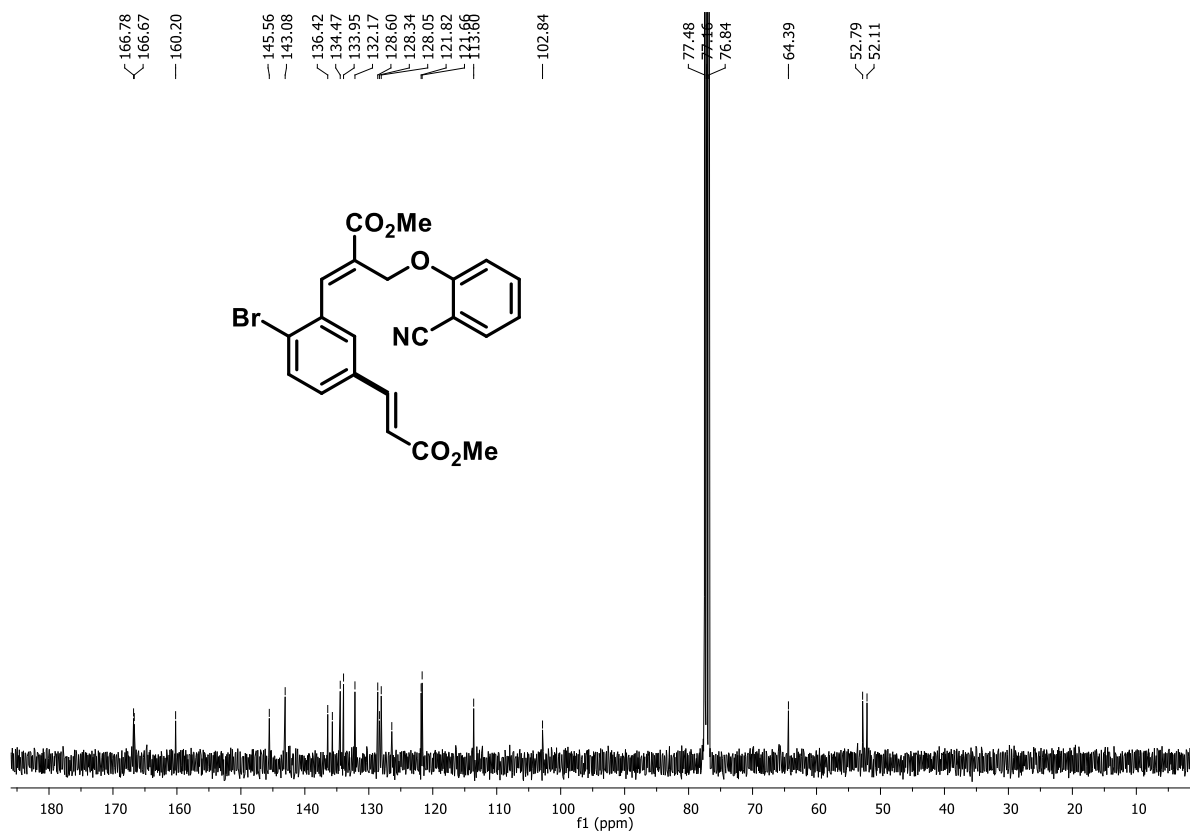

**Dimethyl 3,3'-(2-((E)-2-((2-cyanophenoxy)methyl)-3-methoxy-3-oxoprop-1-en-1-yl)-1,4-phenylene) (2E,2'E)-diacrylate (4af')**

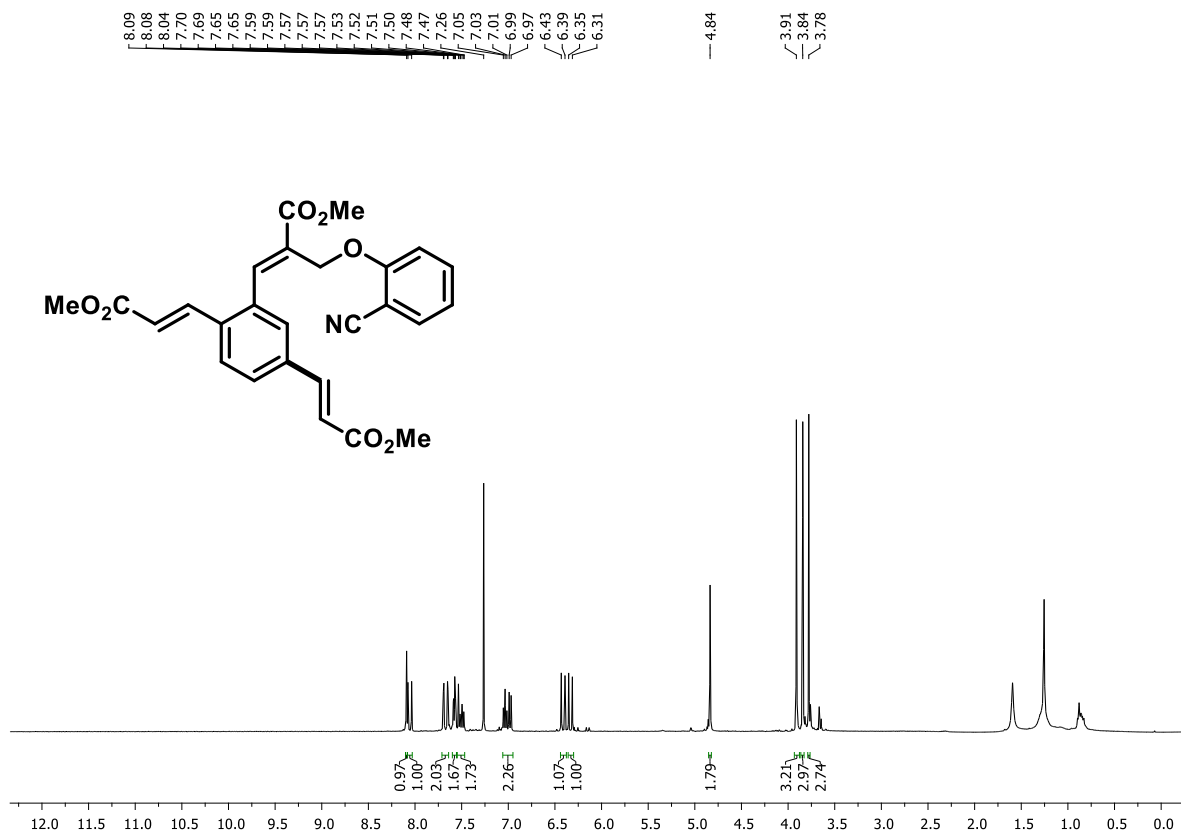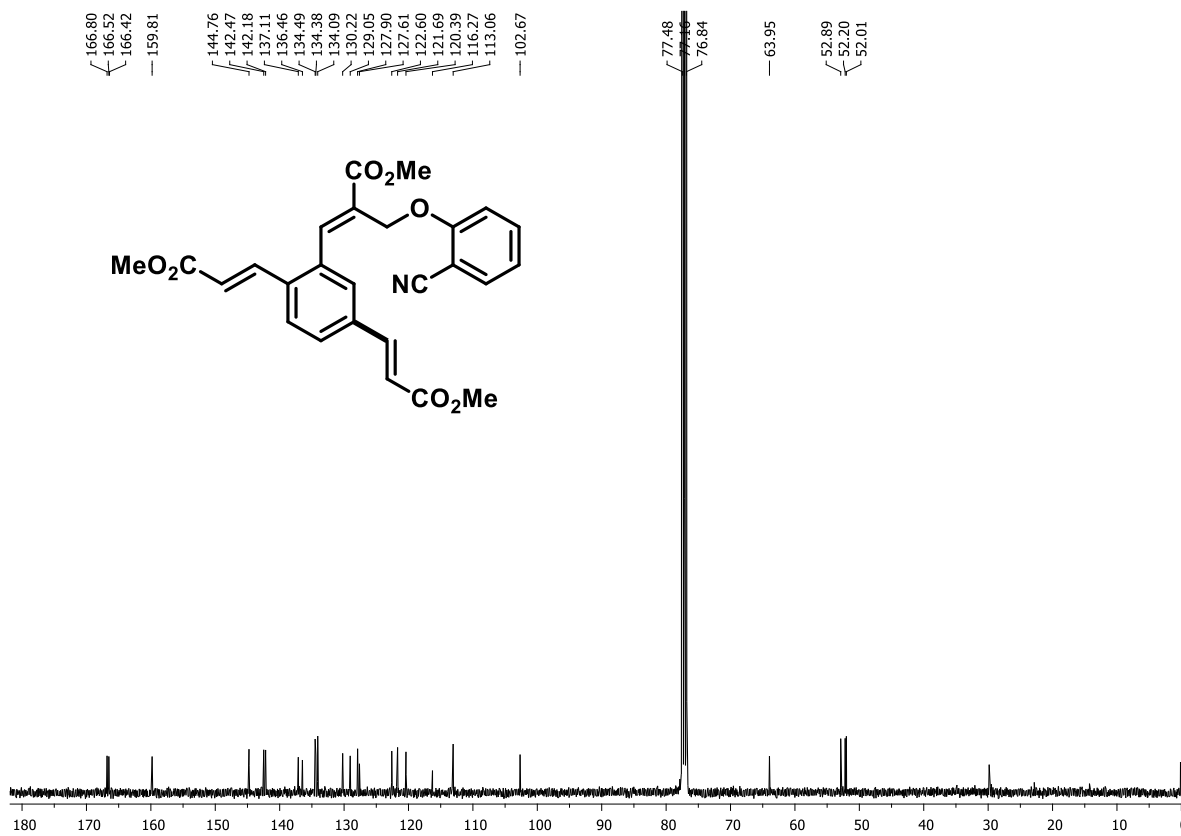

Ethyl (*E*)-2-((2-cyanophenoxy) methyl)-3-(3-((*Z*)-3-oxo-1-phenylprop-1-en-1-yl)phenyl) acrylate (5a)

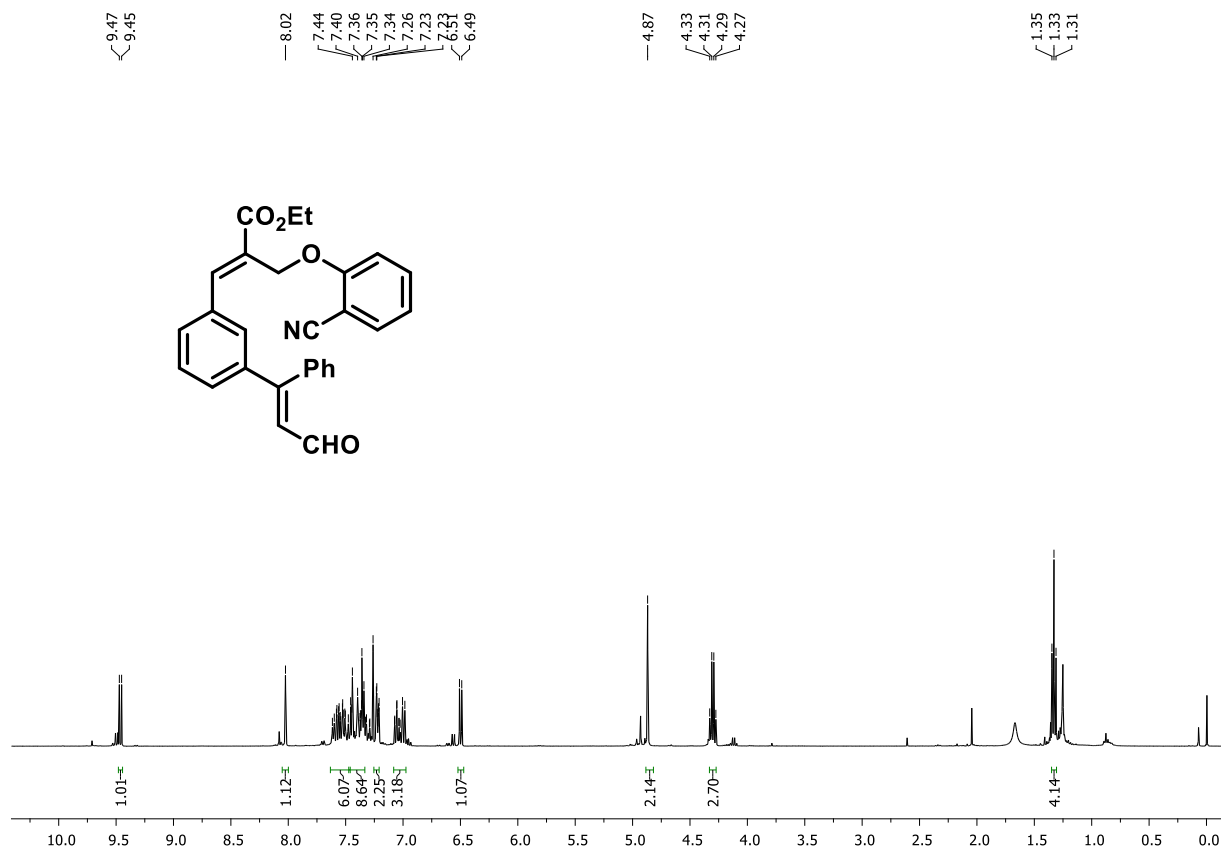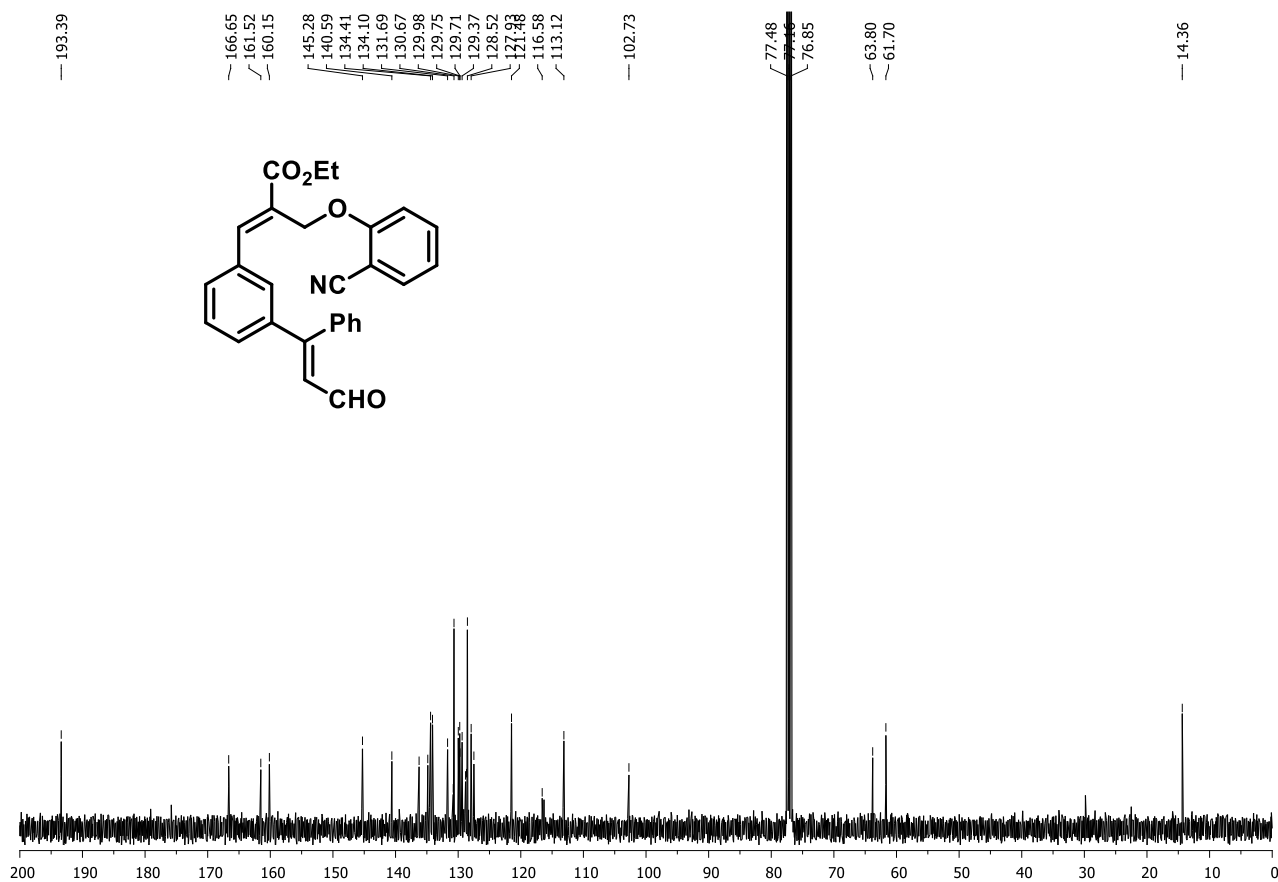



Butyl (*E*)-2-((2-cyanophenoxy)methyl)-3-(3-((*Z*)-3-oxo-1-phenylprop-1-en-1-yl)phenyl) acrylate (5b)

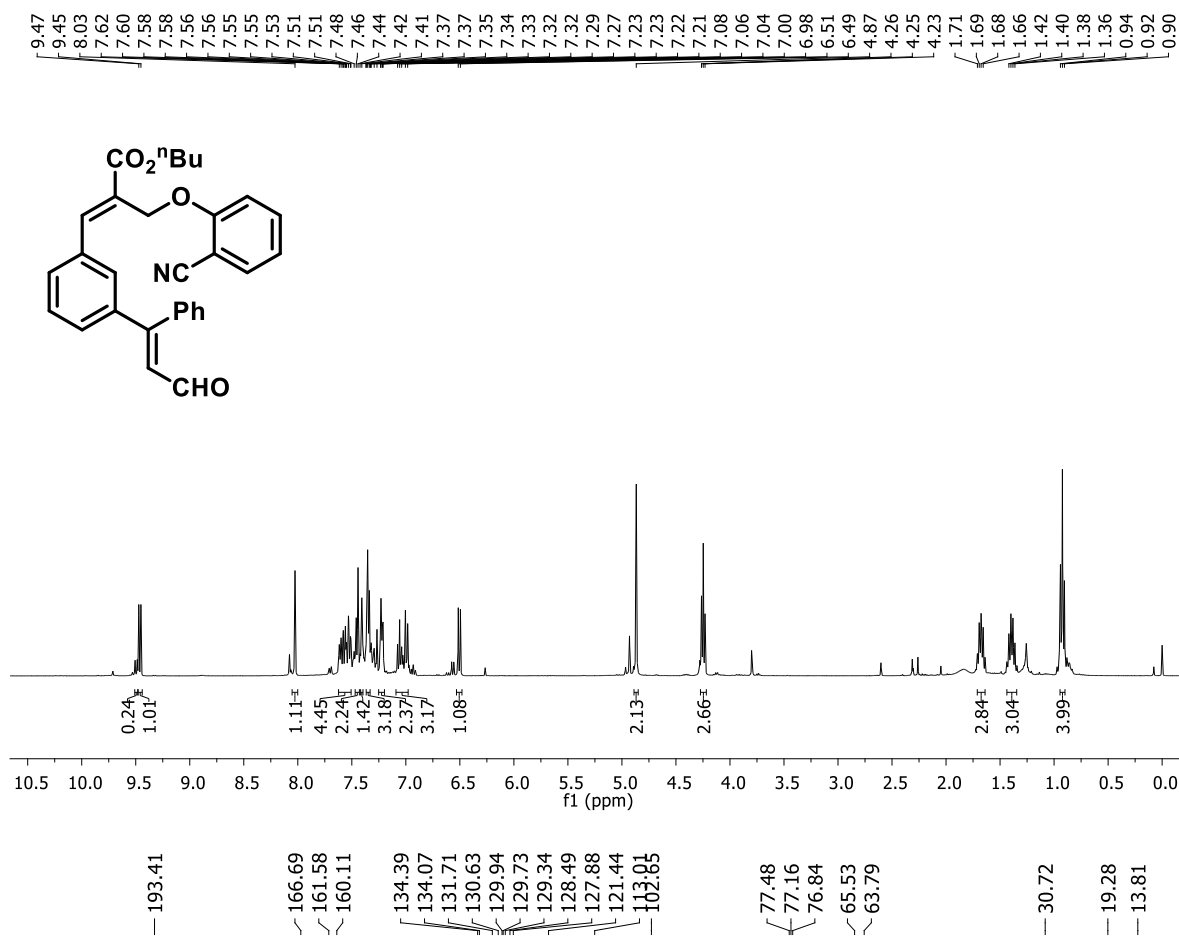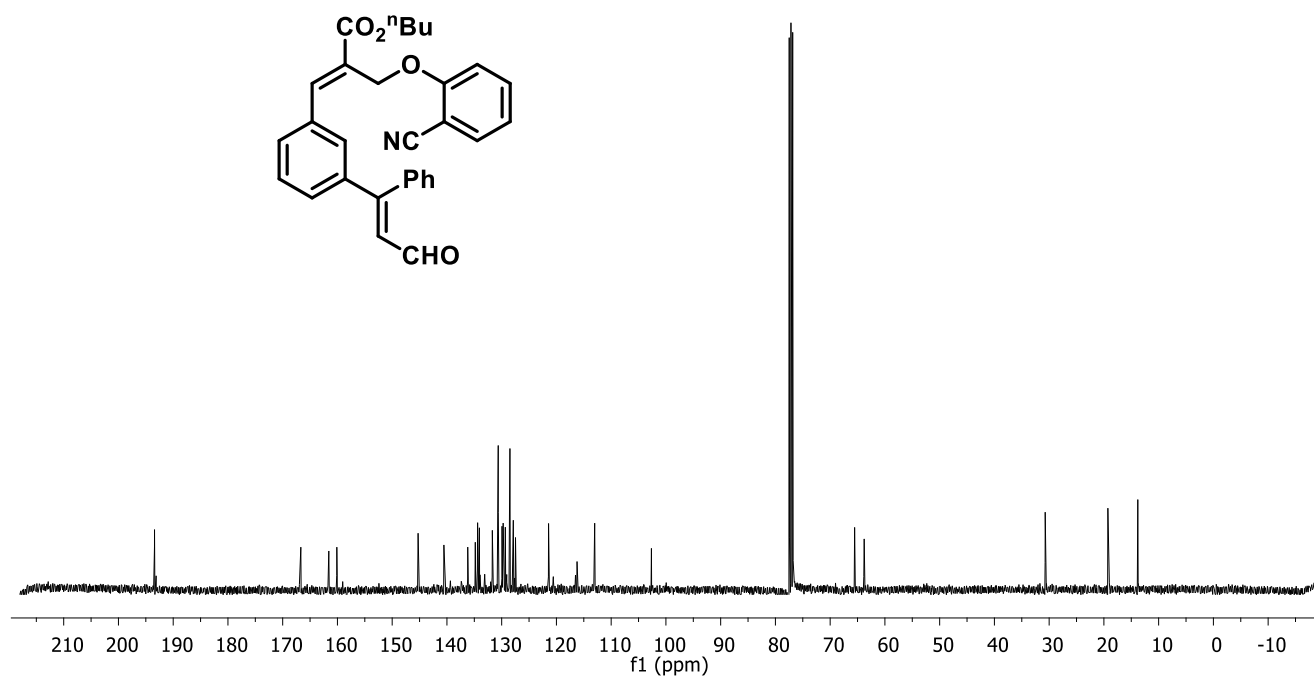

Methyl (*E*)-2-((2-cyanophenoxy) methyl)-3-(7-((*Z*)-3-oxo-1-phenylprop-1-en-1-yl)benzo[d][1,3]dioxol-5-yl)acrylate (**5c**)

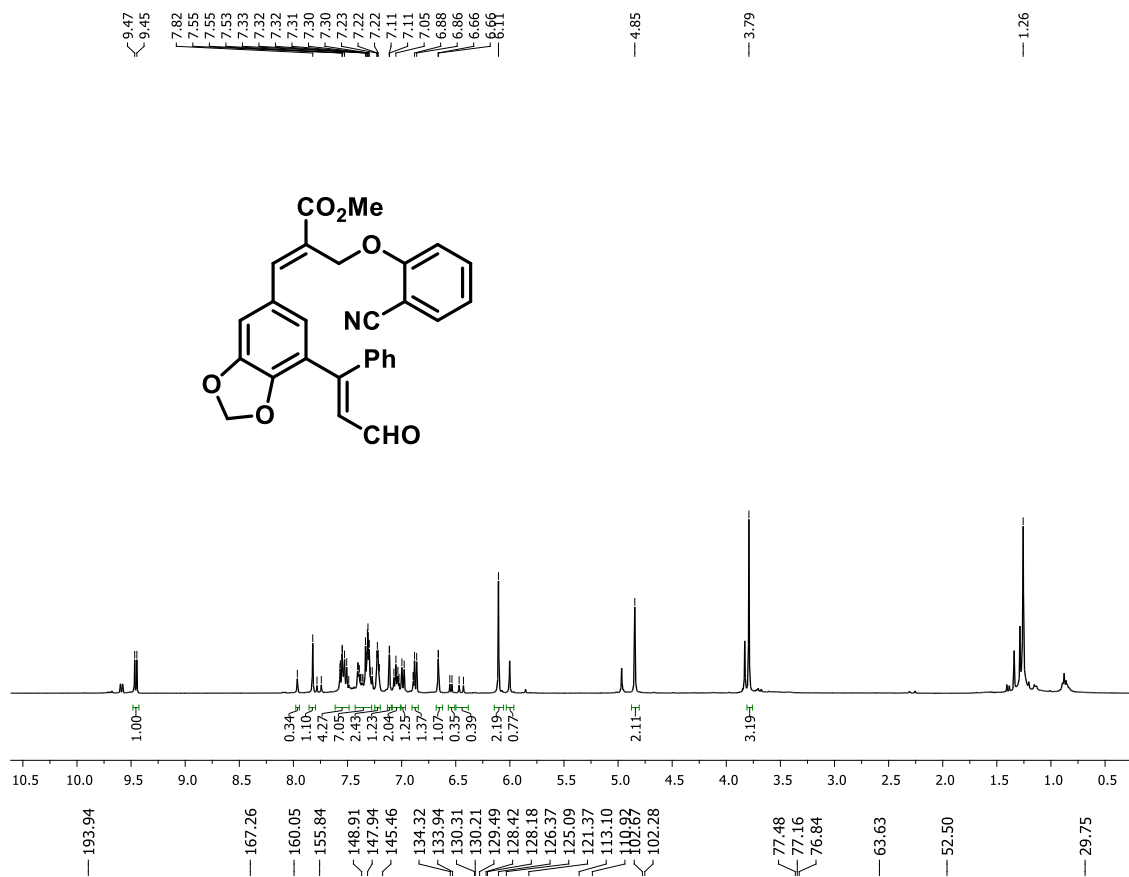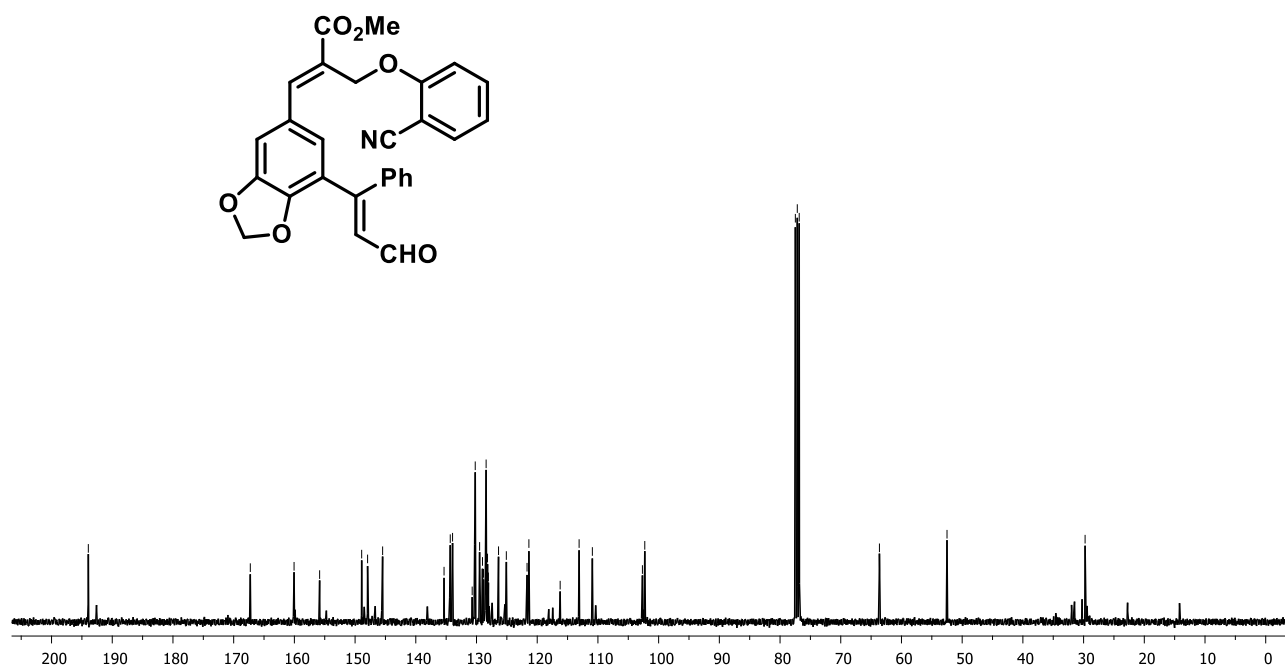

Methyl acrylate (5d) **(E)-2-((2-cyanophenoxy)methyl)-3-(2-methoxy-5-((Z)-3-oxo-1-phenylprop-1-en-1-yl)phenyl)**

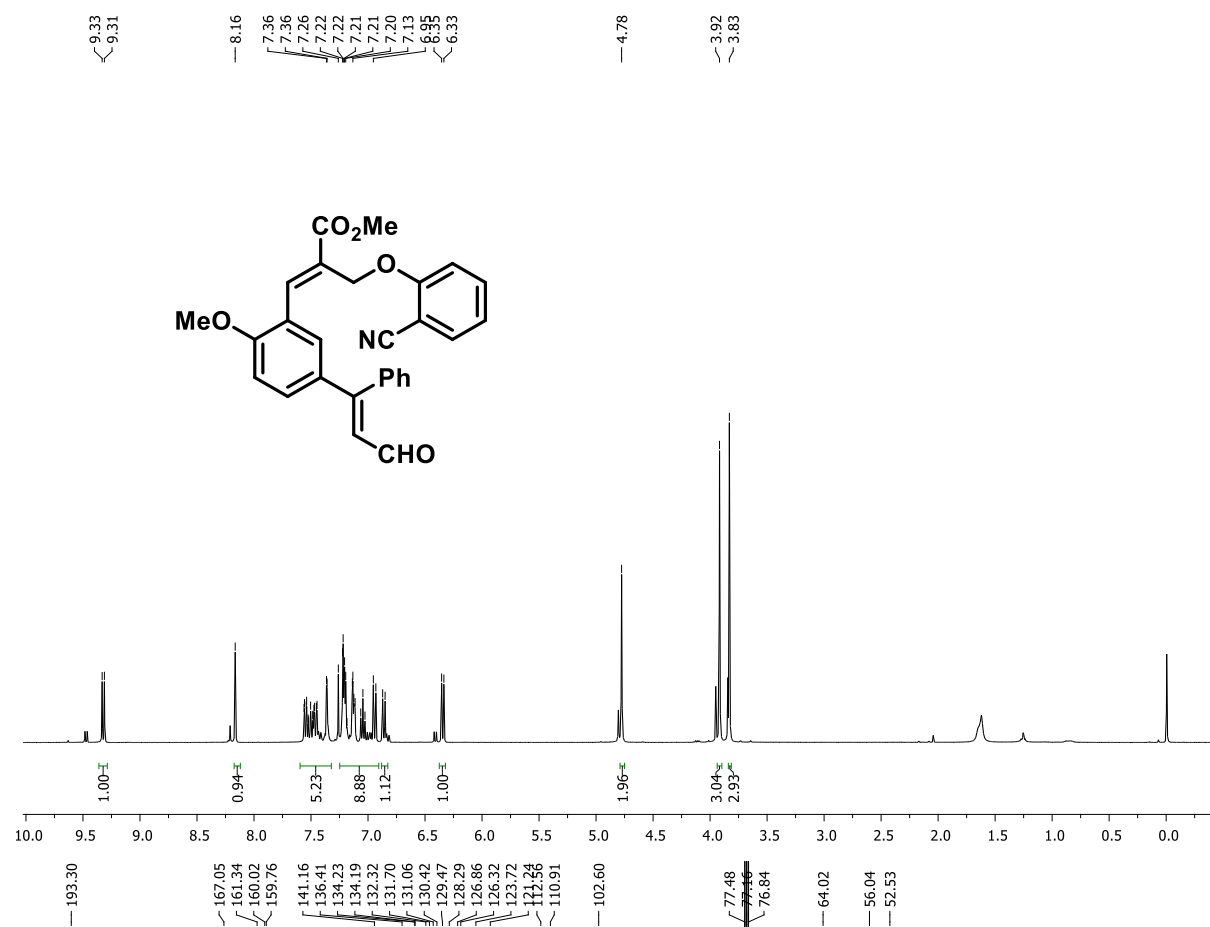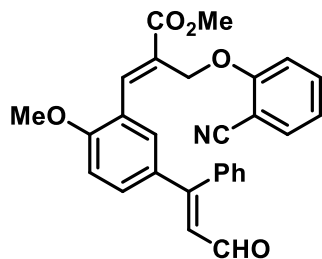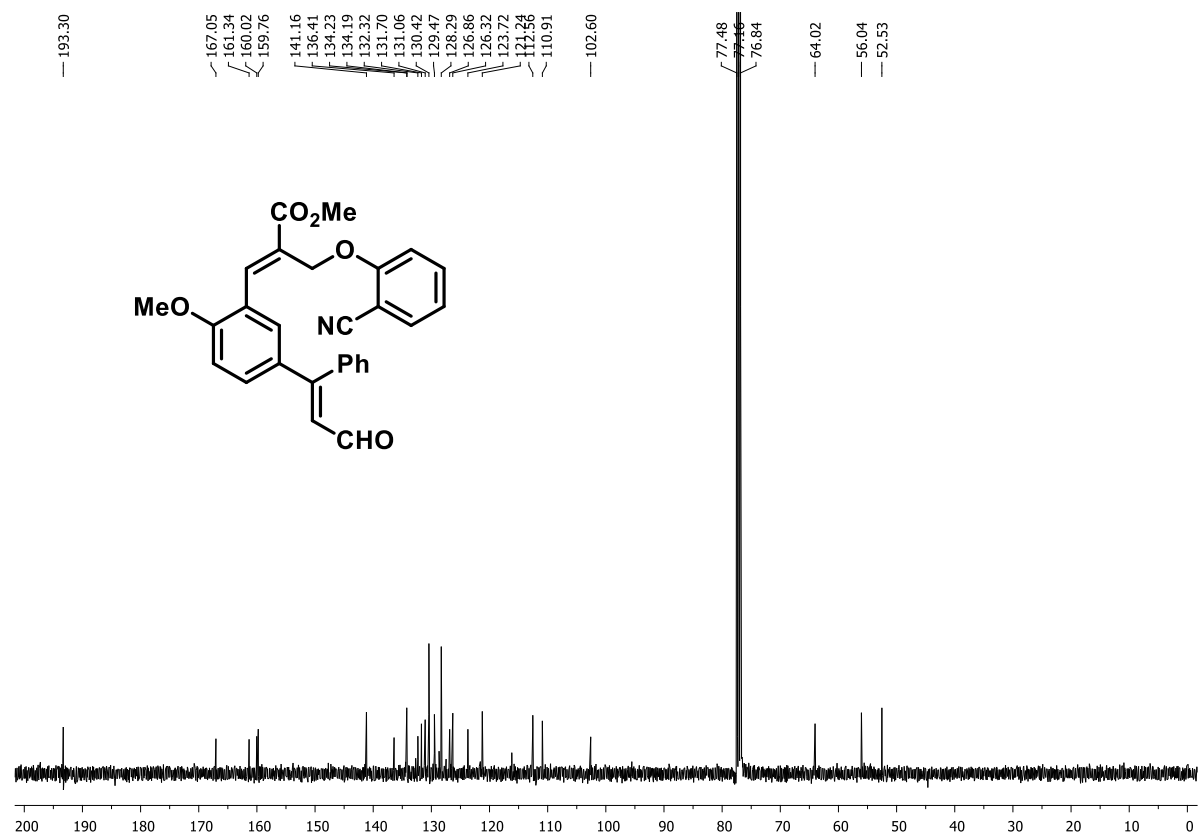

**Methyl (*E*)-2-((2-cyanophenoxy) methyl)-3-(5-((*Z*)-3-methoxy-3-oxo-1-phenylprop-1-en-1-yl)-2-methylphenyl) acrylate (5e)**

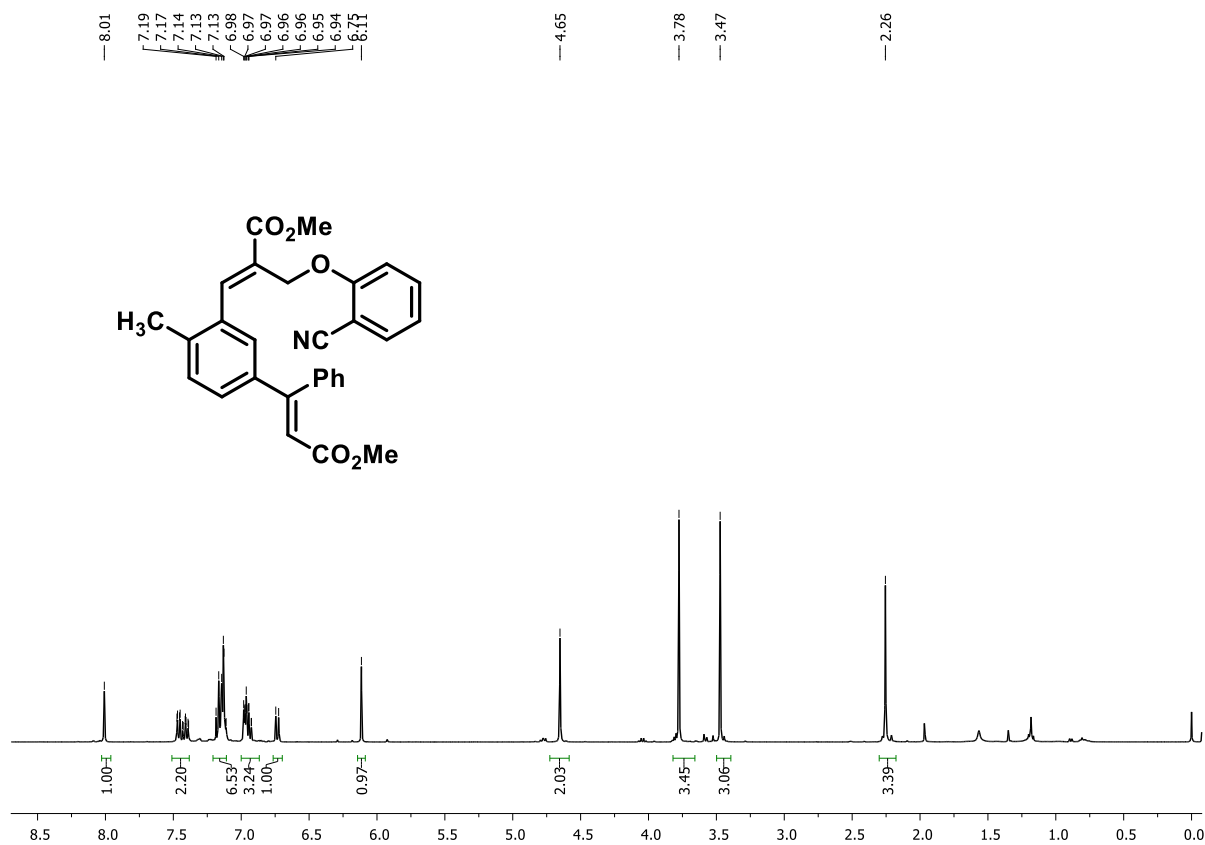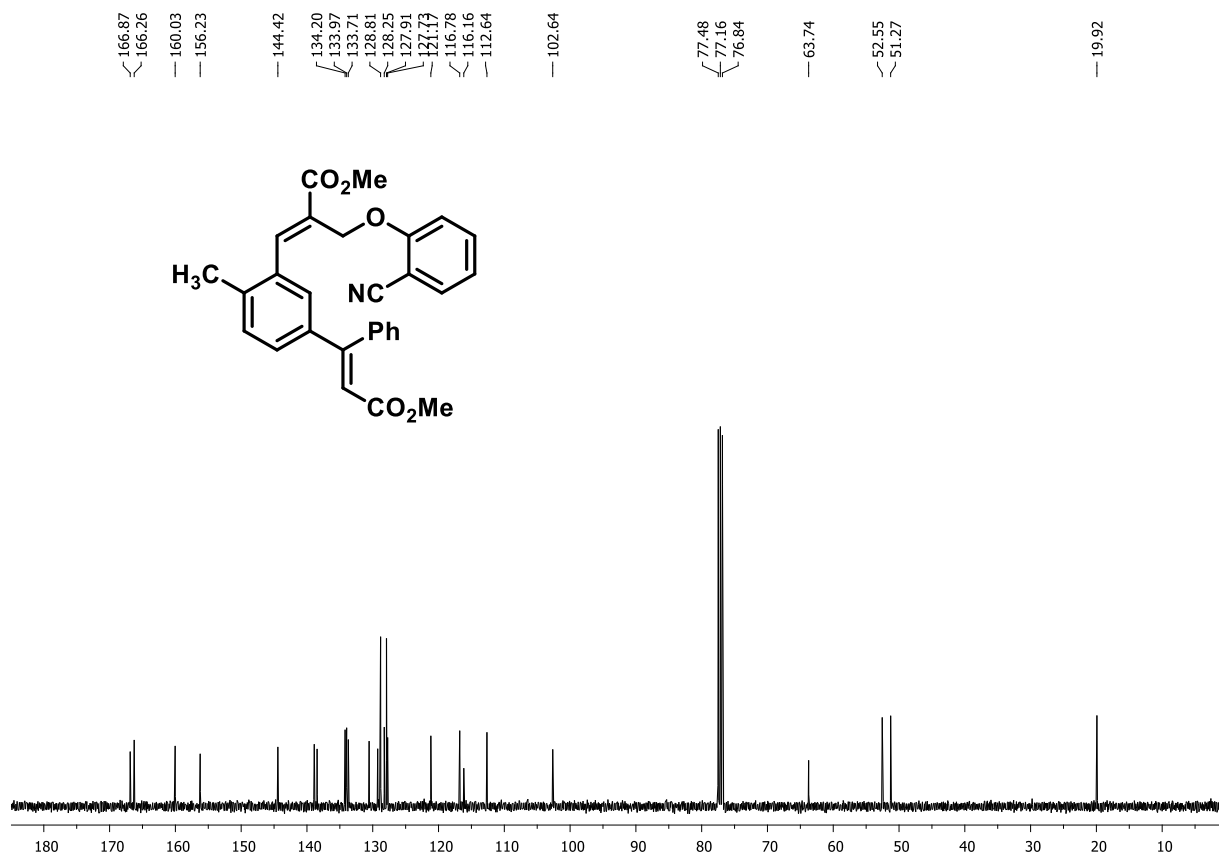

**Methyl (*E*)-3-(4-chloro-3-((*Z*)-3-methoxy-3-oxo-1-phenylprop-1-en-1-yl) phenyl) -2-((2-cyanophenoxy) methyl) acrylate (**5f**)**

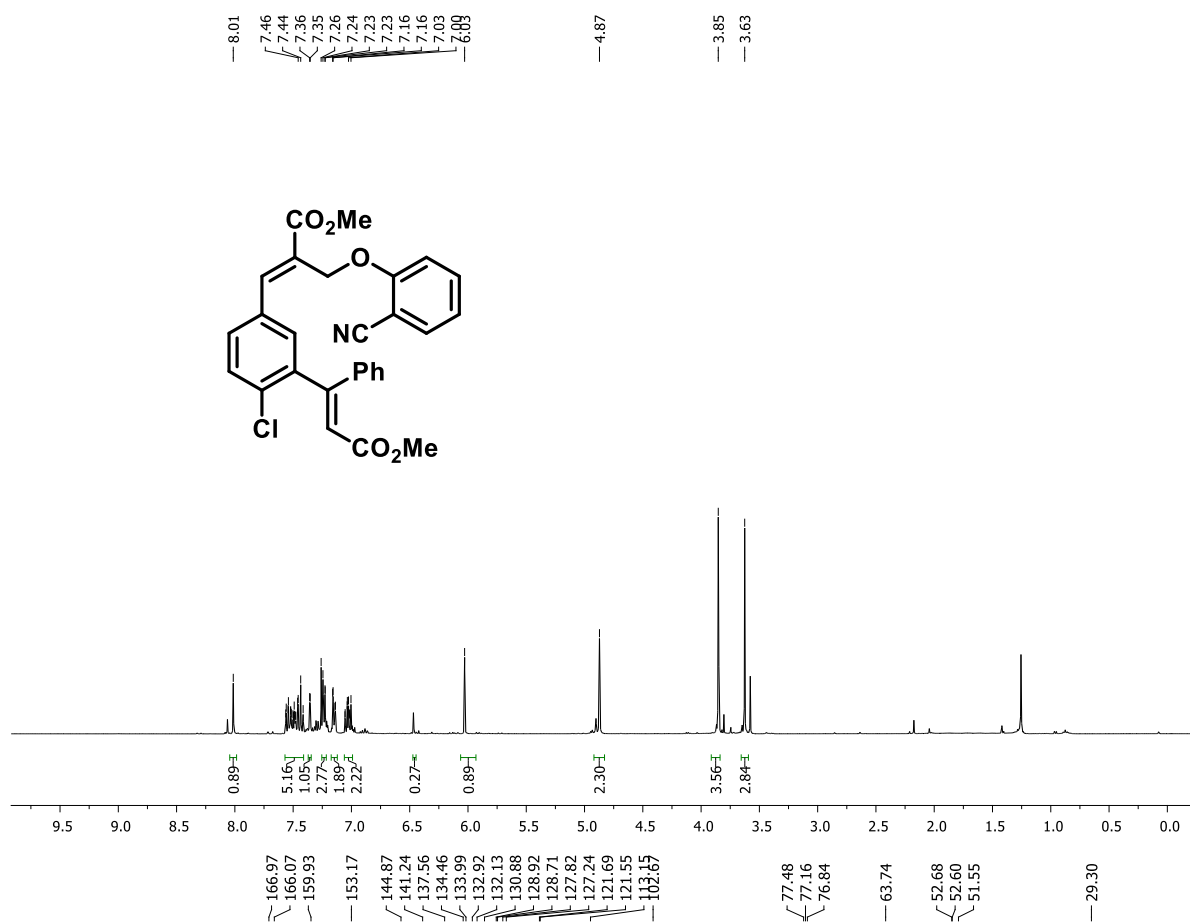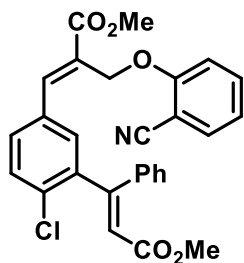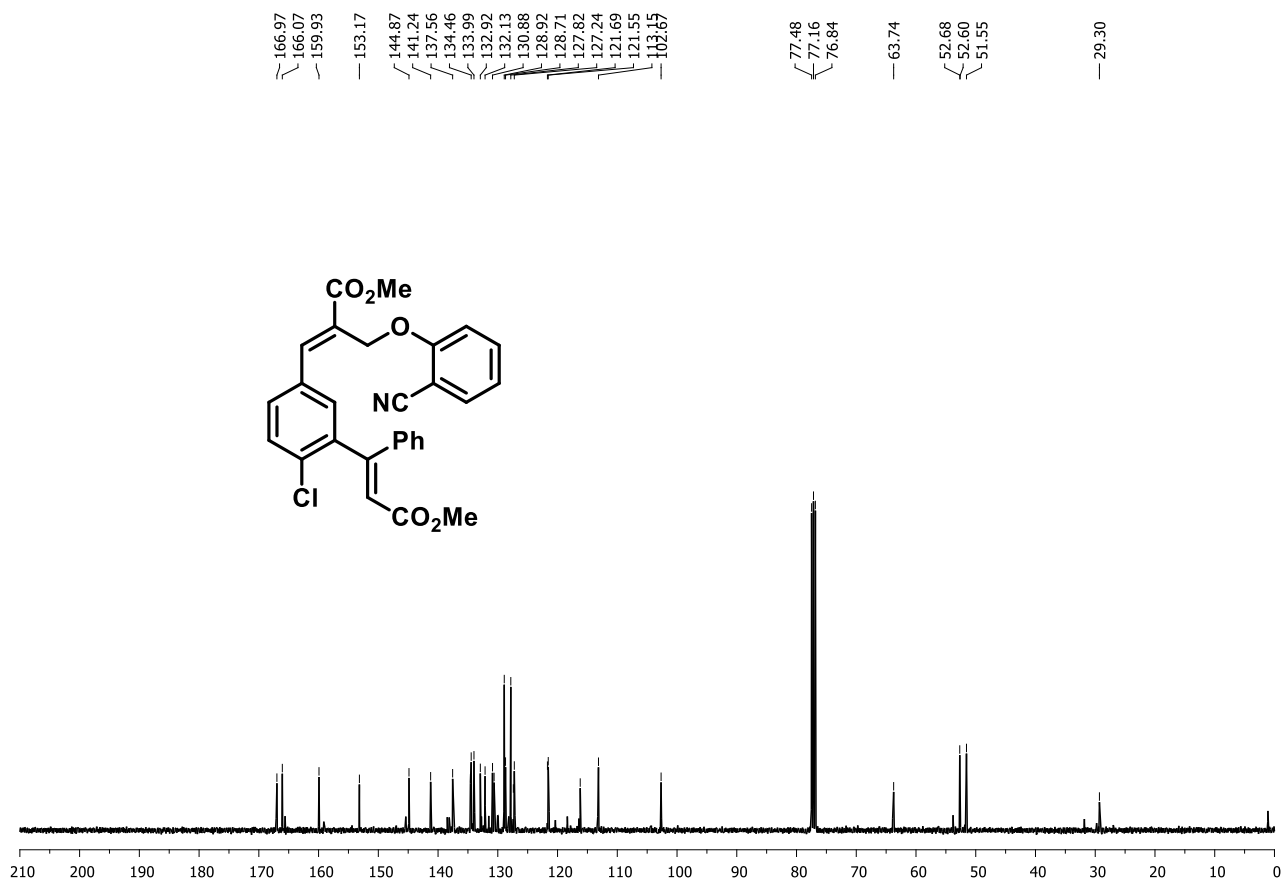

Dimethyl 2-(3-((*E*)-2-((2-cyanophenoxy)methyl)-3-ethoxy-3-oxoprop-1-en-1-yl)phenyl)maleate (6a)

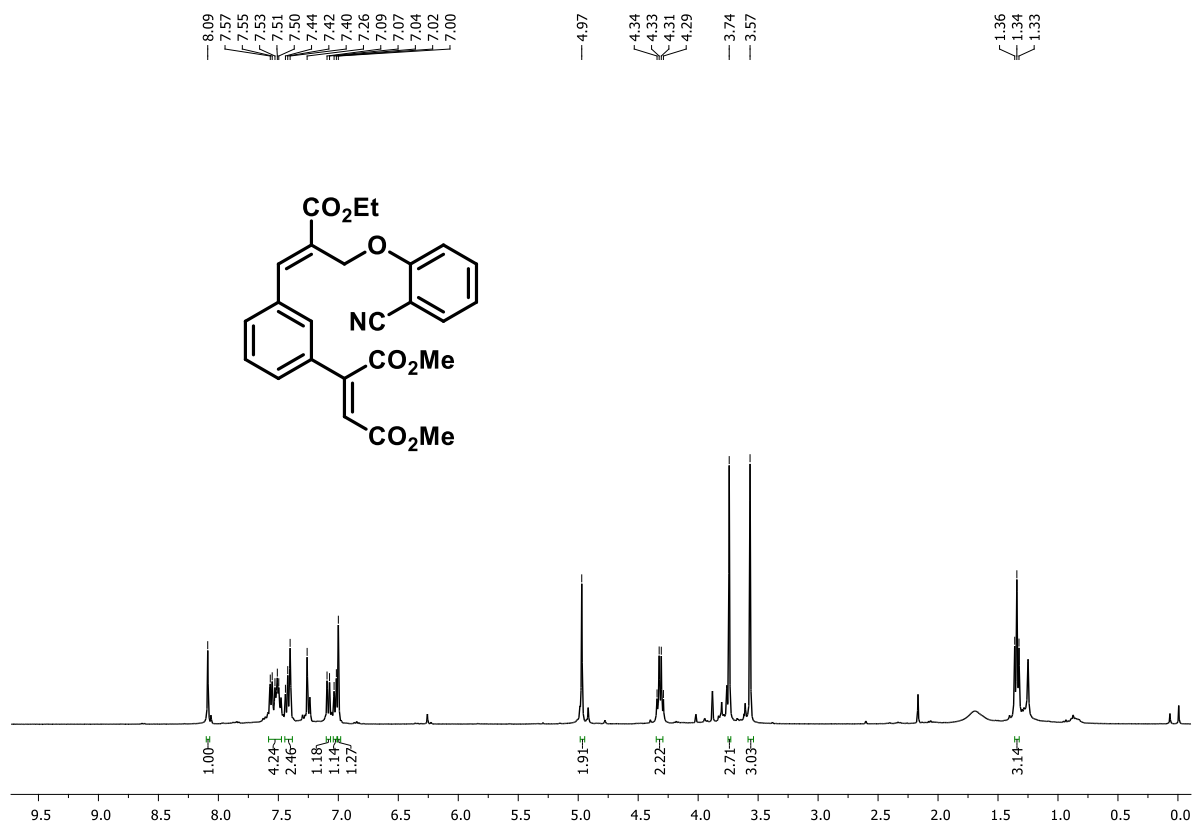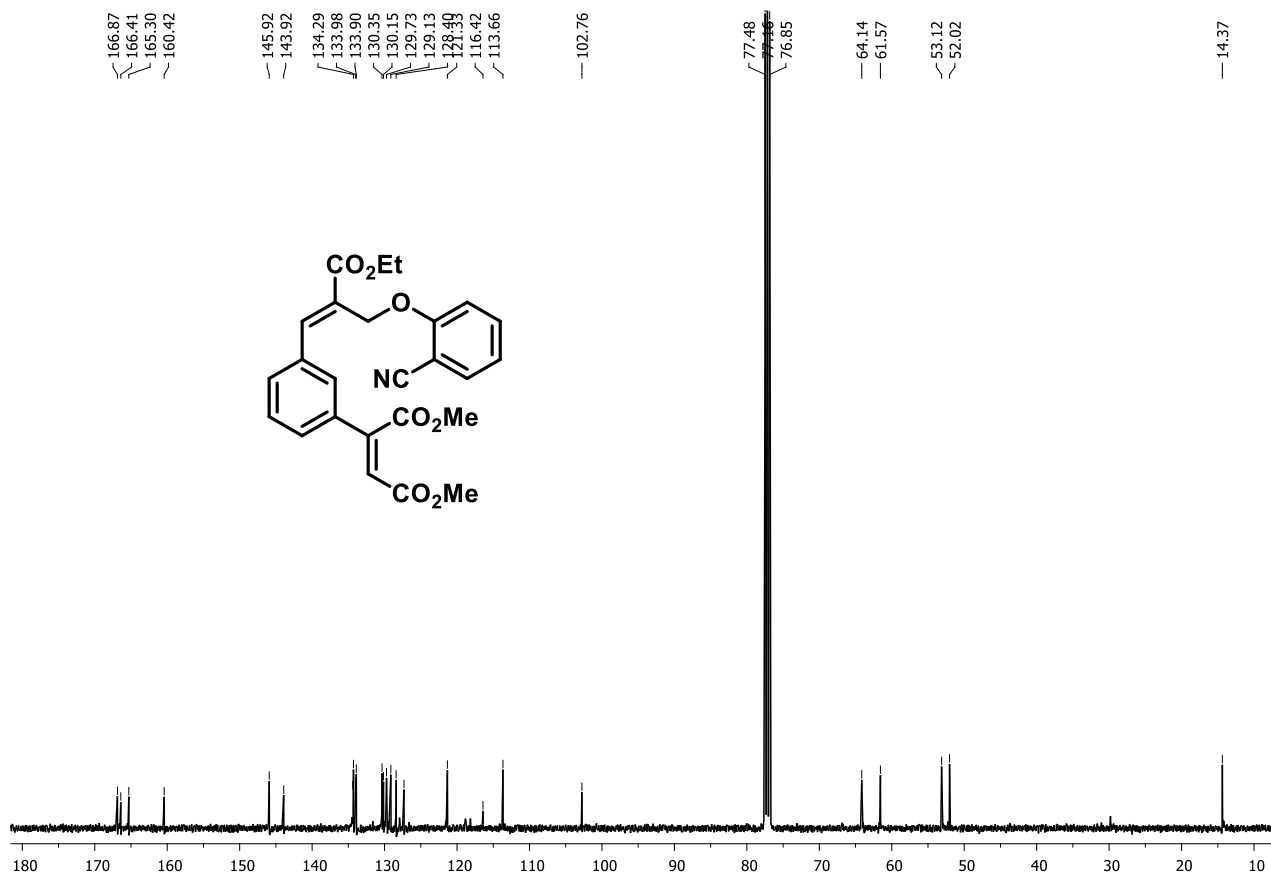

Dibutyl 2-(3-((*E*)-2-((2-cyanophenoxy) methyl)-3-ethoxy-3-oxoprop-1-en-1-yl)phenyl) maleate (6b)

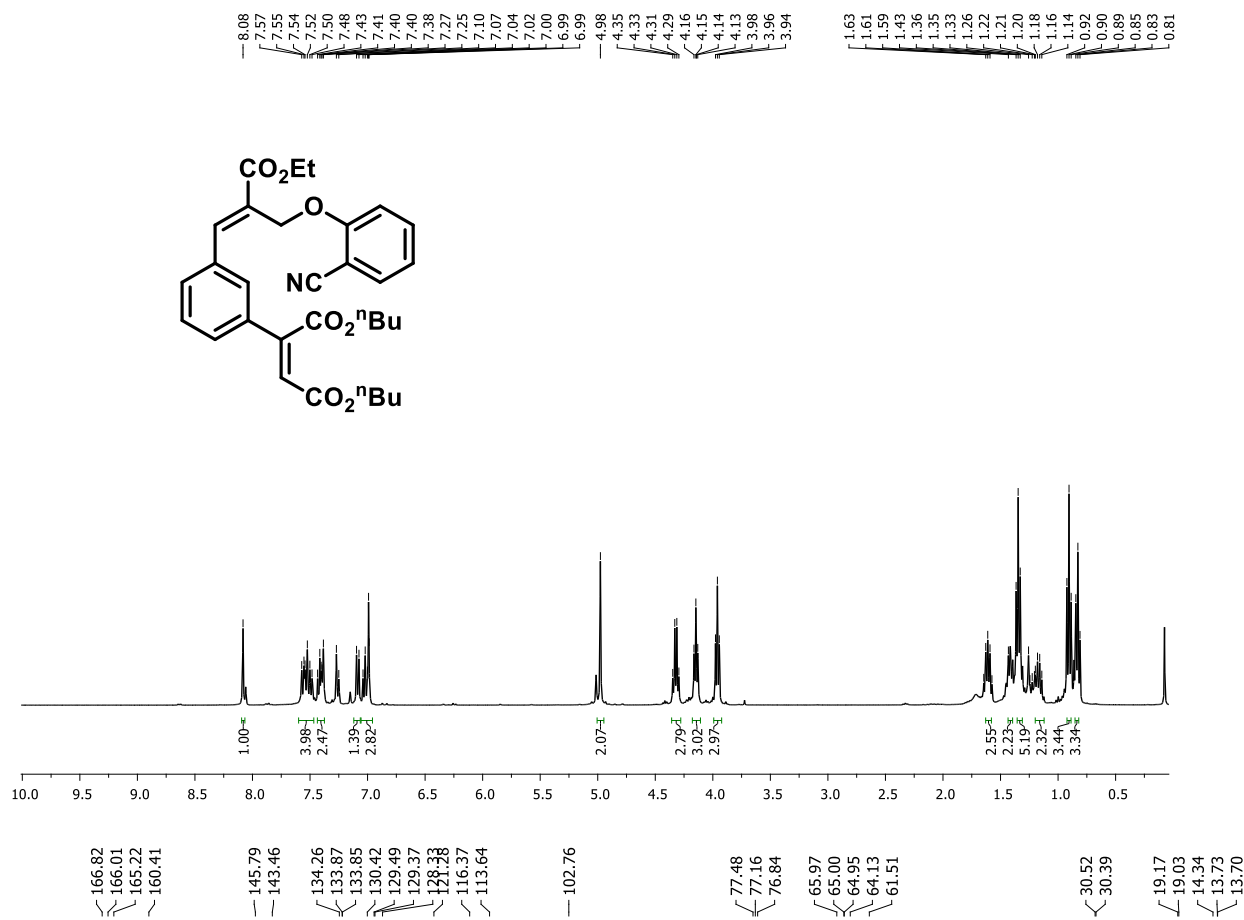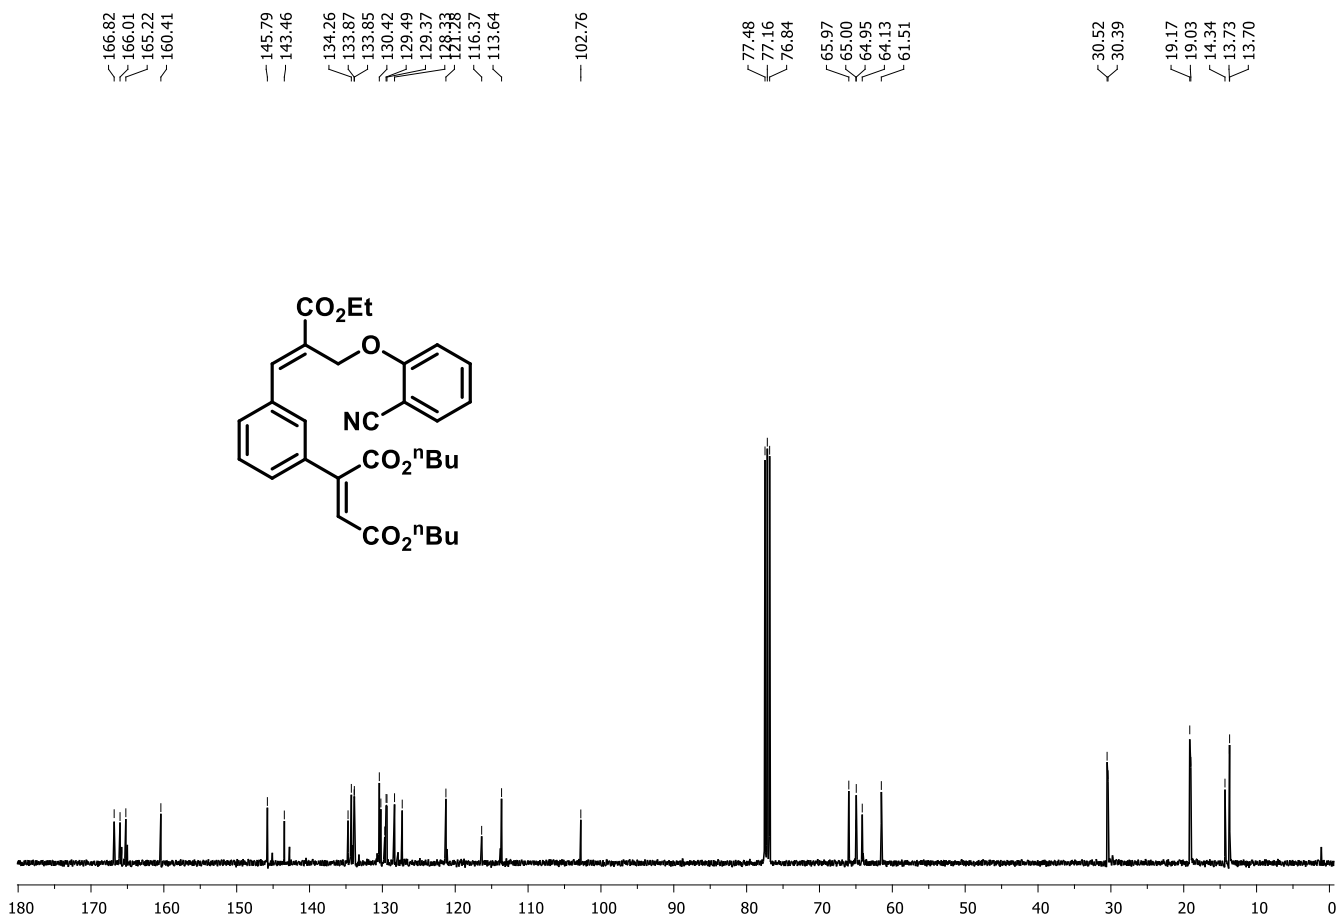

Dimethyl 2-(3-((*E*)-3-butoxy-2-((2-cyanophenoxy)methyl)-3-oxoprop-1-en-1-yl)phenyl) maleate (6c)

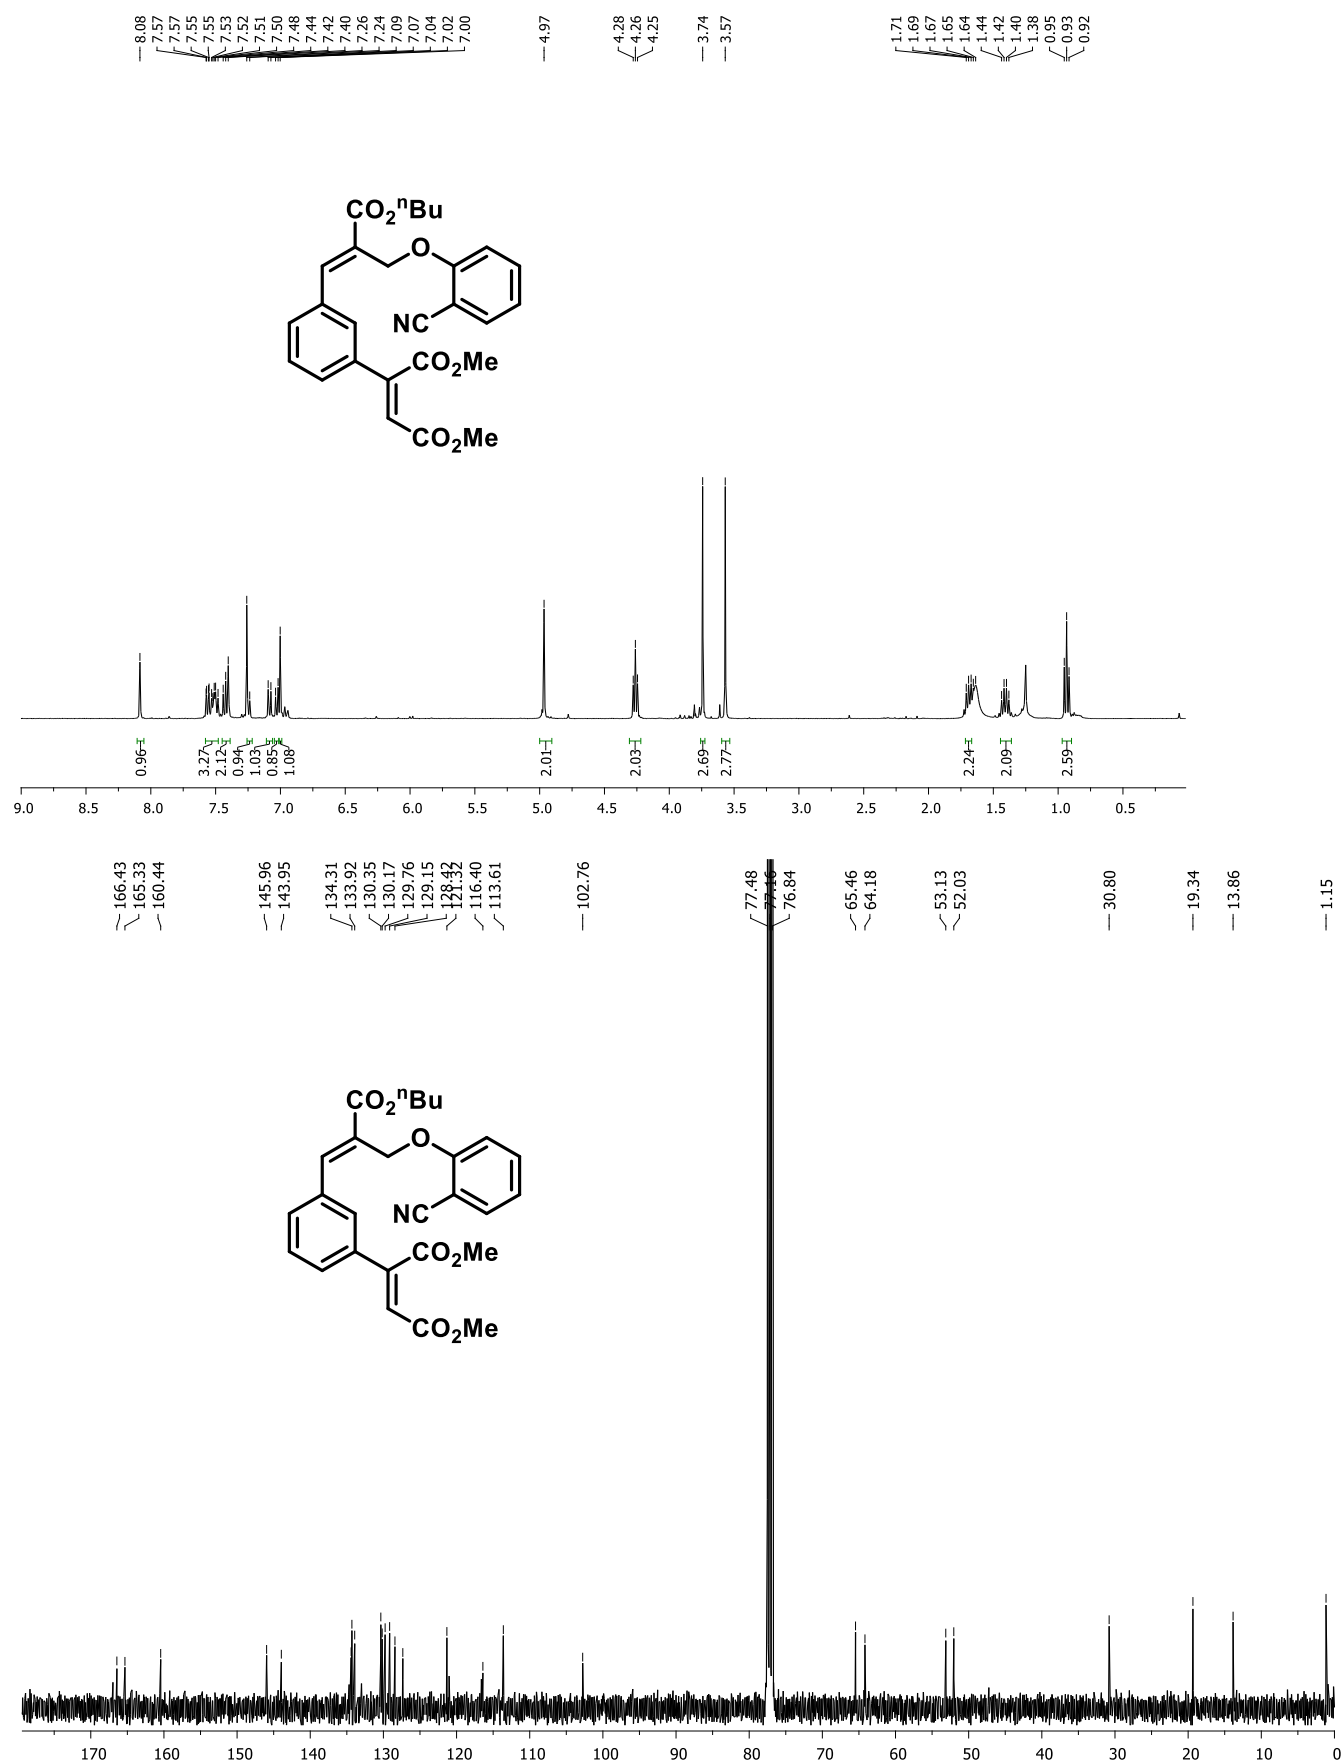



**Diethyl 2-(3-((E)-2-((2-cyanophenoxy)methyl)-3-methoxy-3-oxoprop-1-en-1-yl)-4-methylphenyl)maleate (6d)**

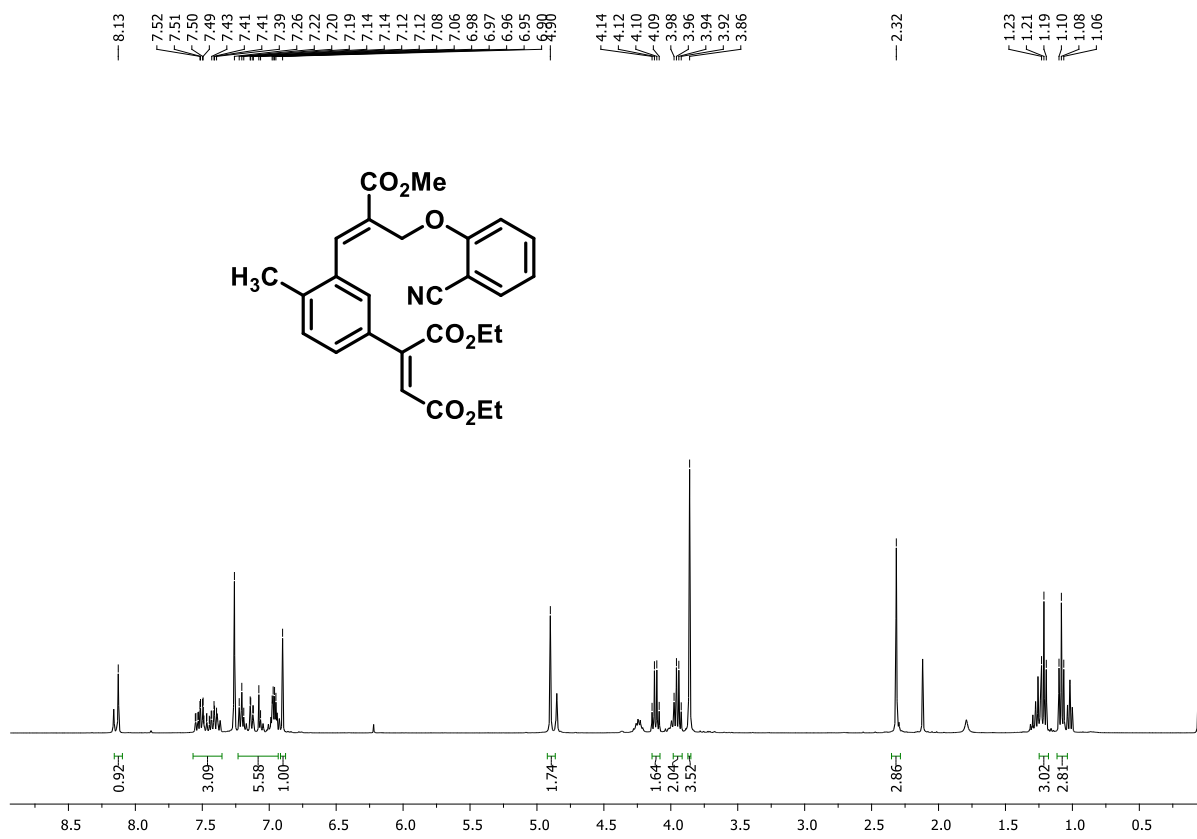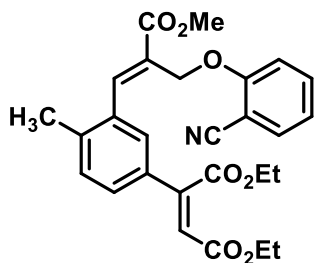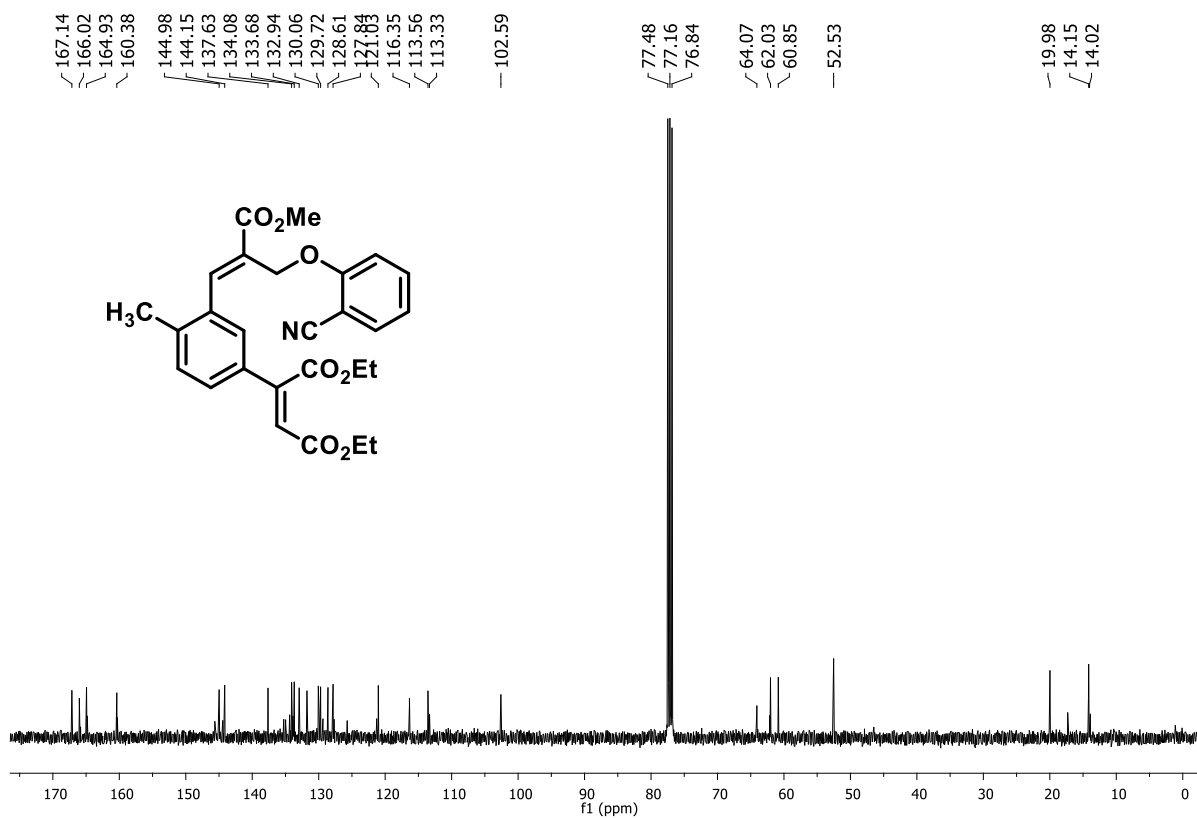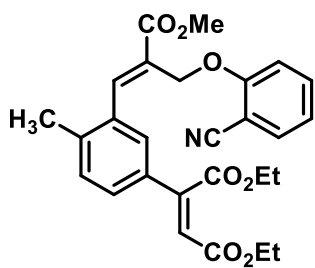

Dimethyl maleate (6e)

2-(3-((E)-2-((2-cyanophenoxy)methyl)-3-methoxy-3-oxoprop-1-en-1-yl)-4-methoxyphenyl)

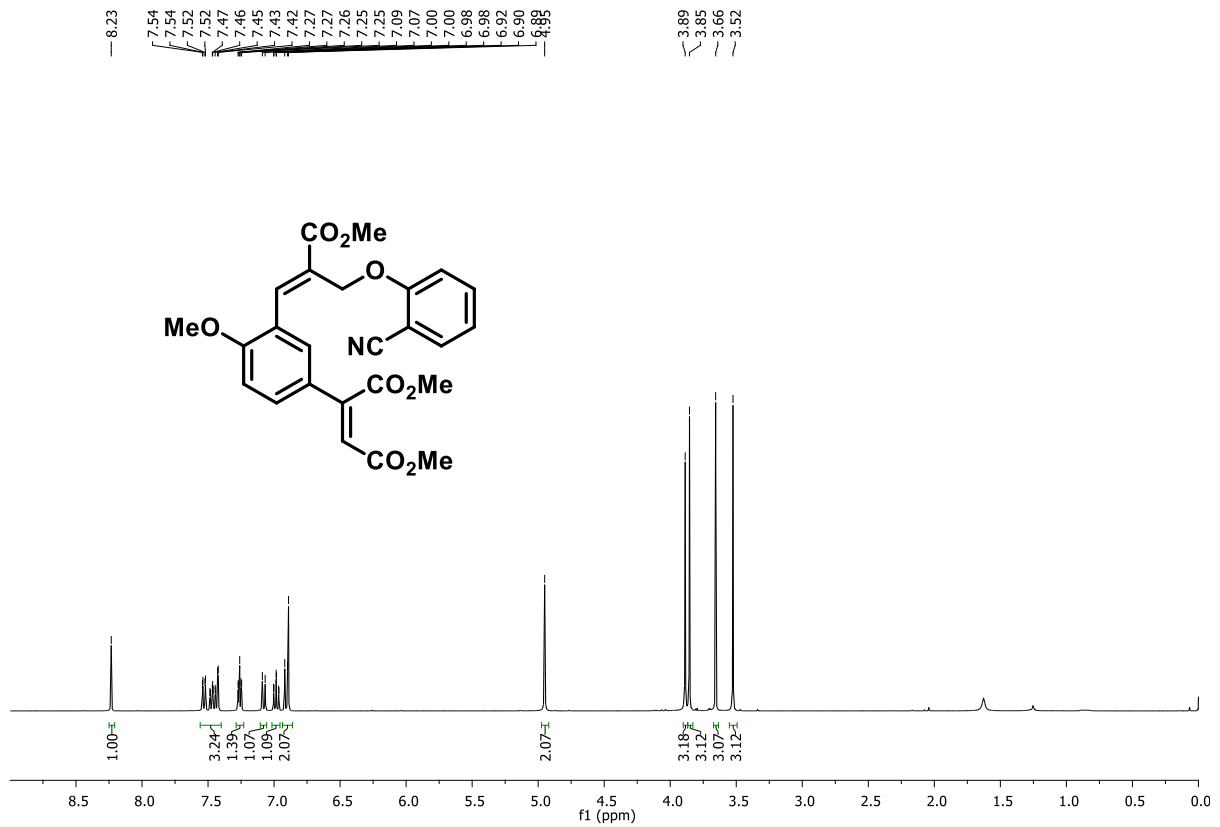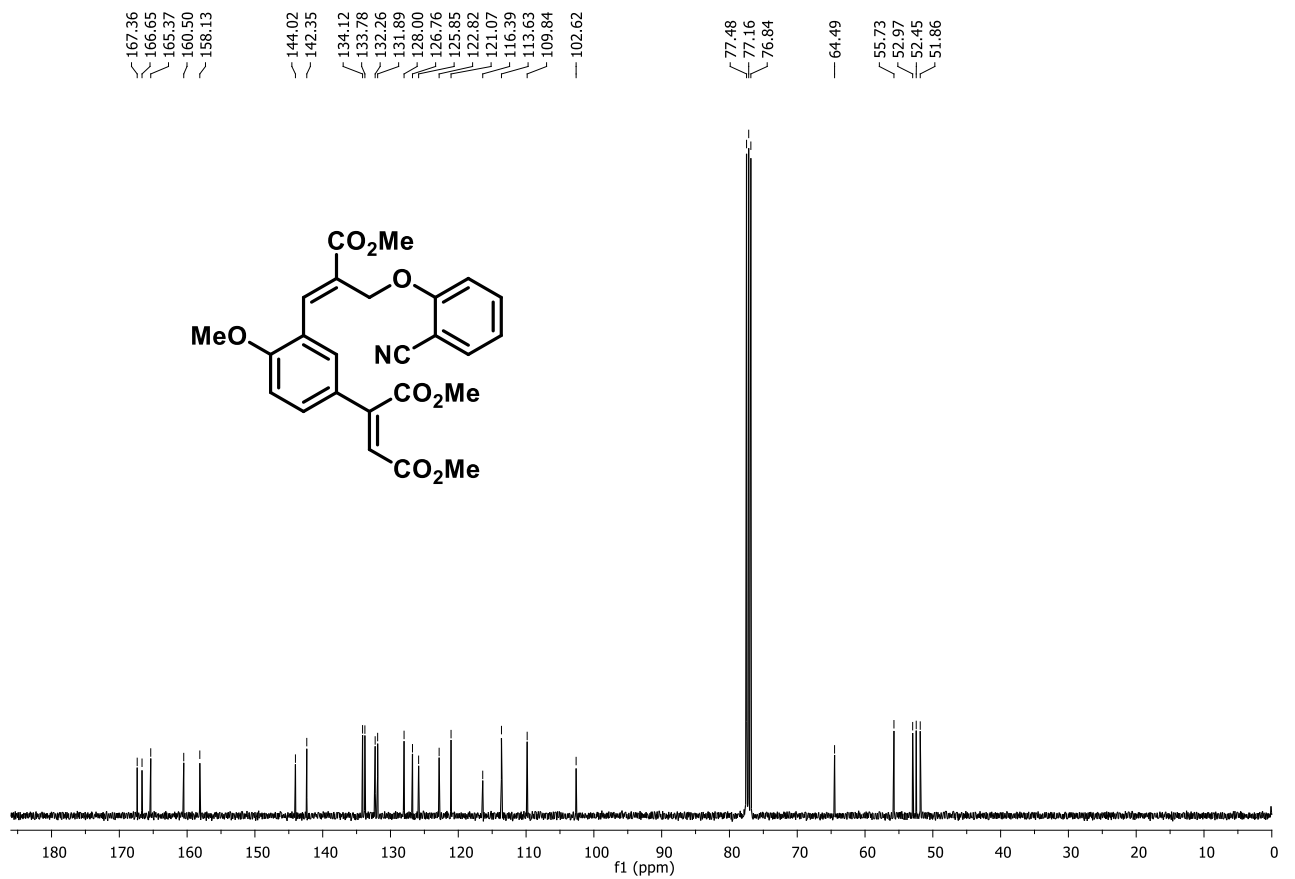

**Diethyl 2-(3-((*E*)-2-((2-cyanophenoxy)methyl)-3-methoxy-3-oxoprop-1-en-1-yl)-4-methoxyphenyl) maleate (6f)**

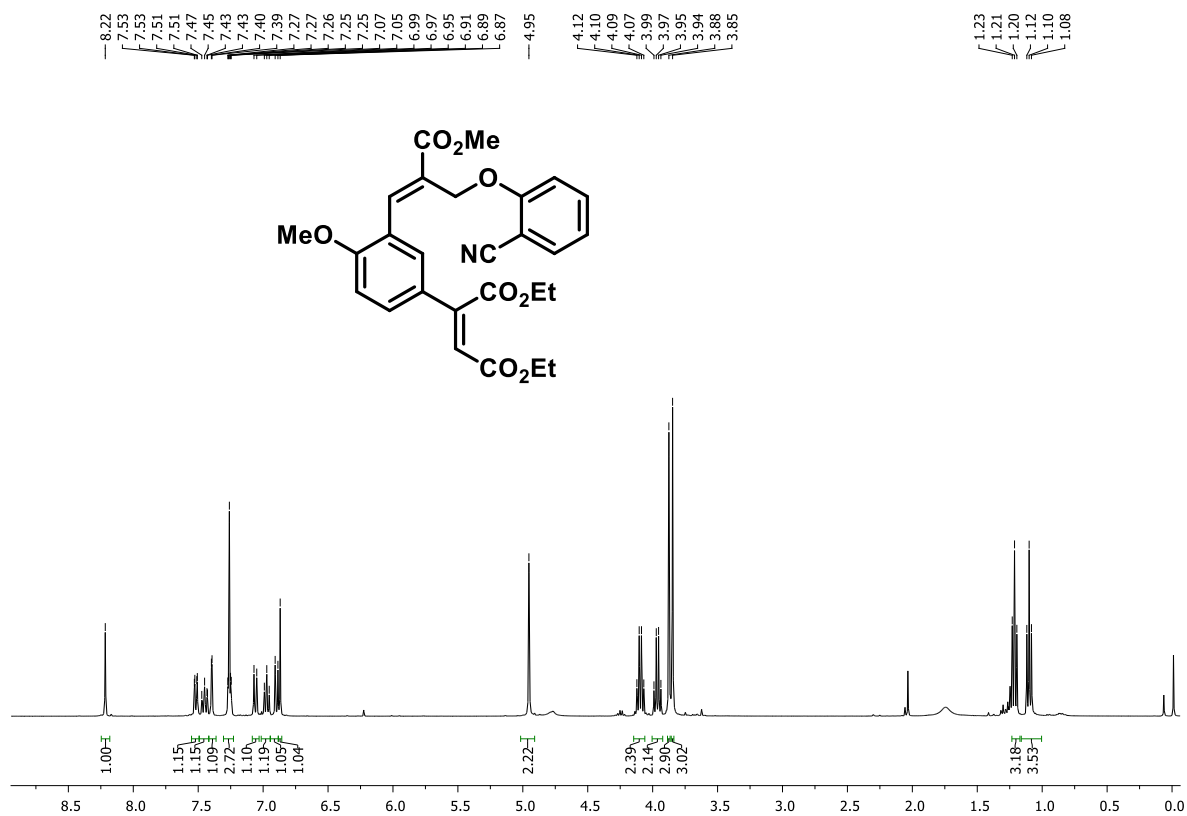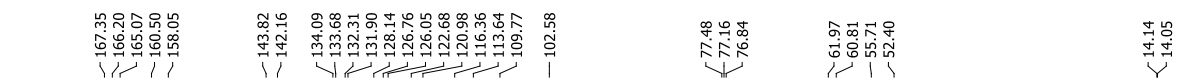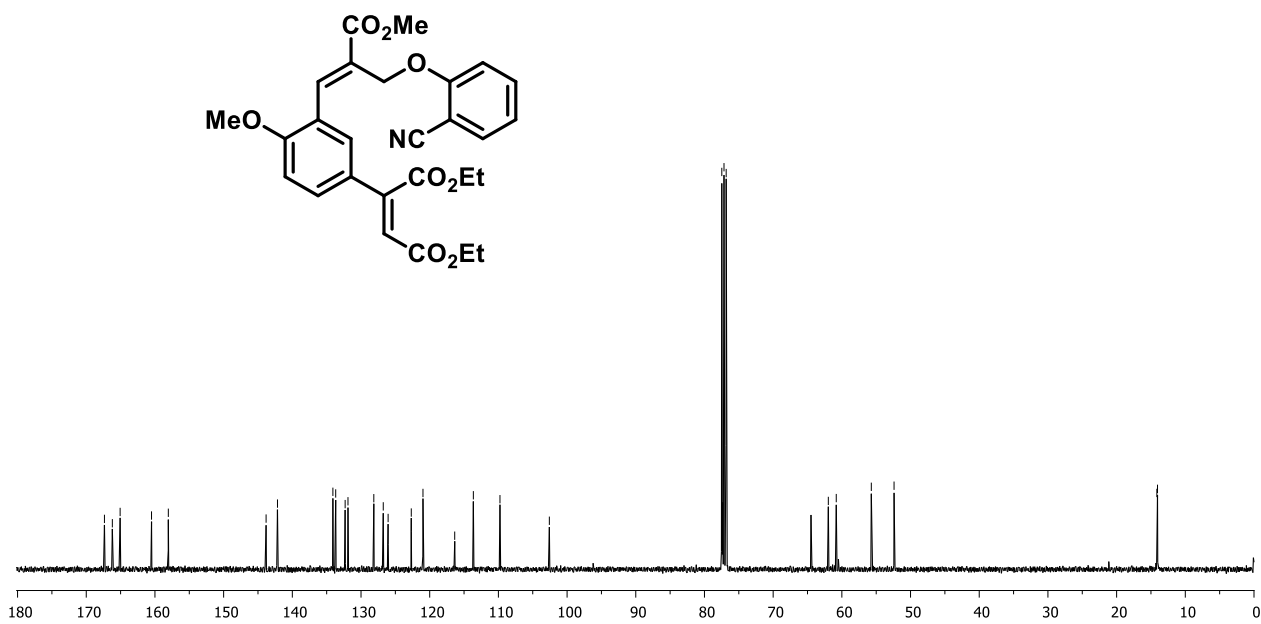

Dibutyl  
maleate (6g)

2-(3-((*E*)-2-((2-cyanophenoxy)methyl)-3-methoxy-3-oxoprop-1-en-1-yl)-4-methoxyphenyl)

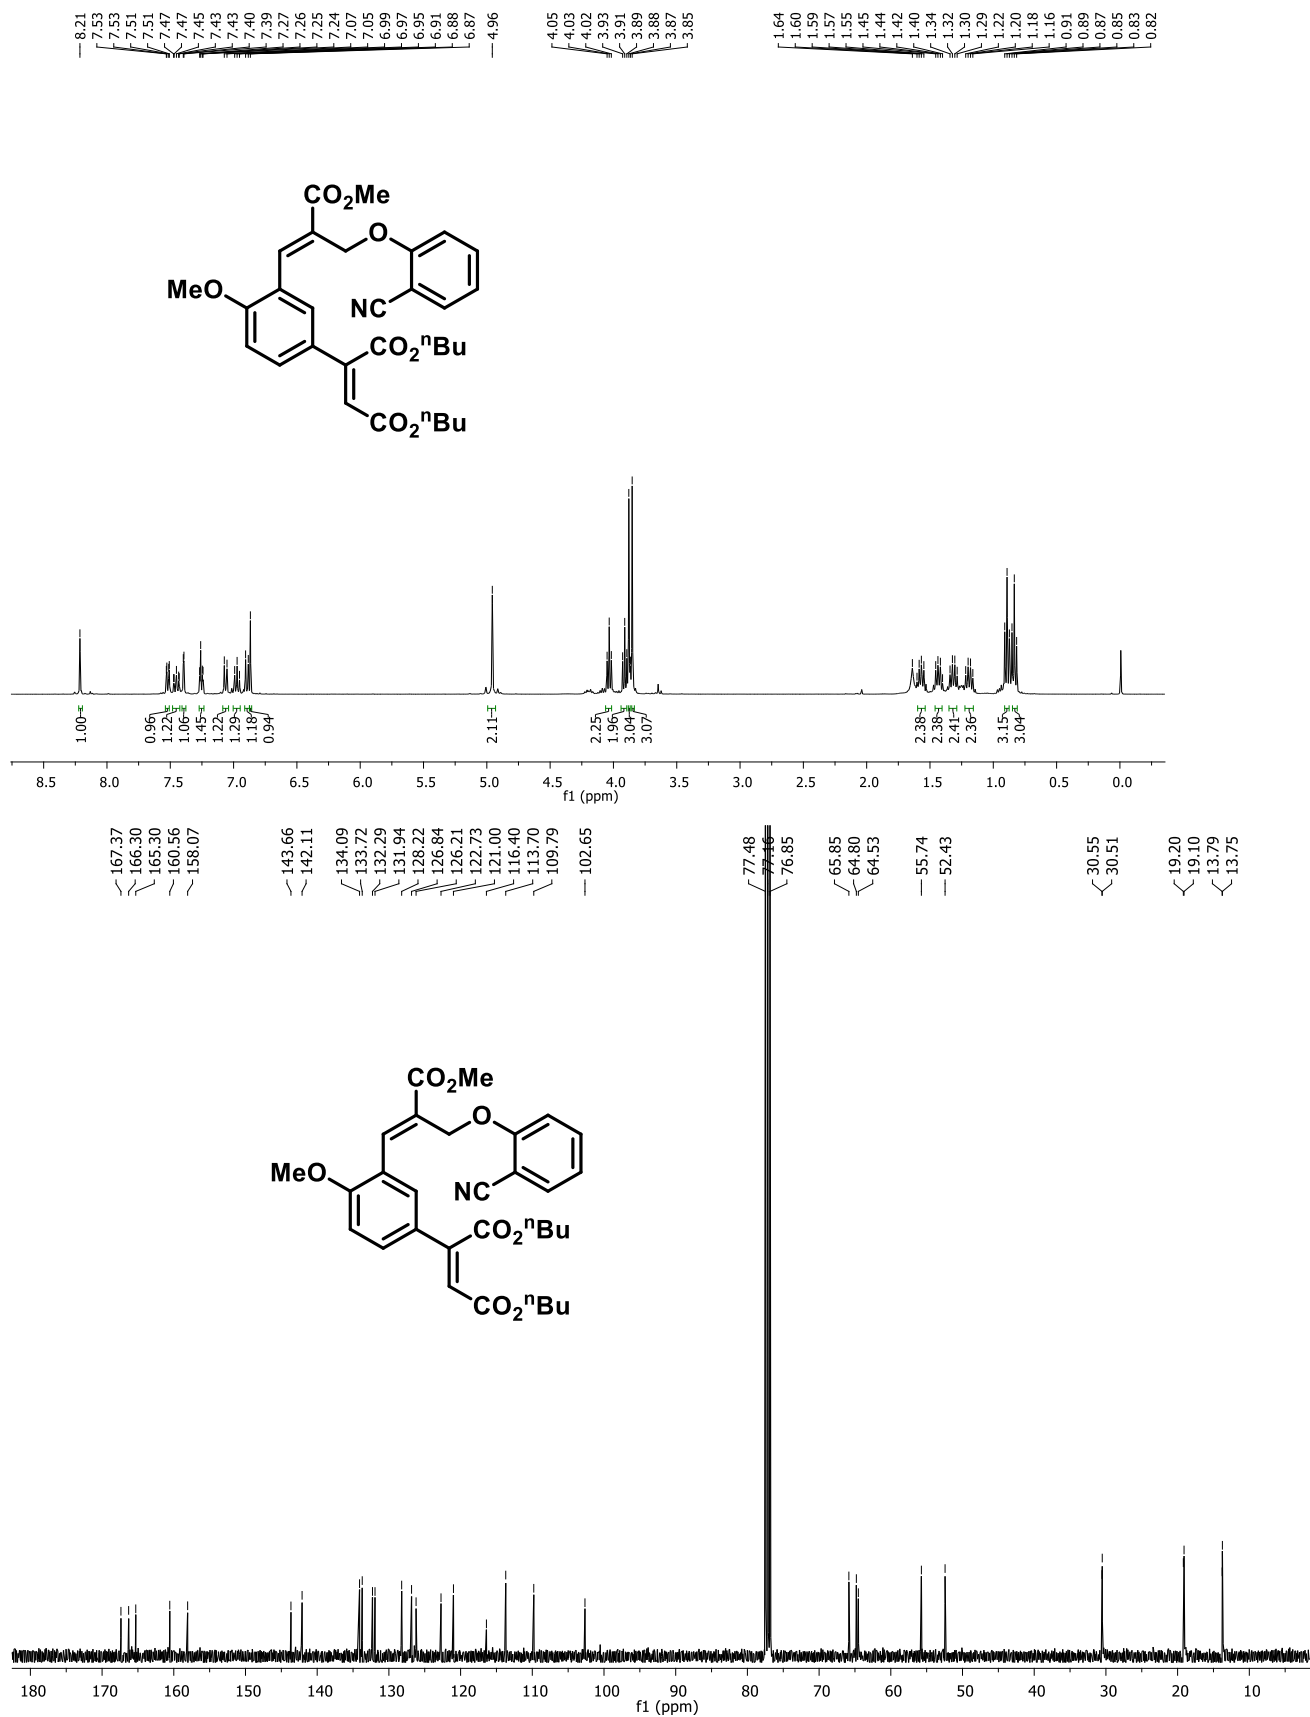

**Diethyl 2-(3-((E)-2-((2-cyanophenoxy)methyl)-3-ethoxy-3-oxoprop-1-en-1-yl)-4-methoxyphenyl)maleate (6h)**

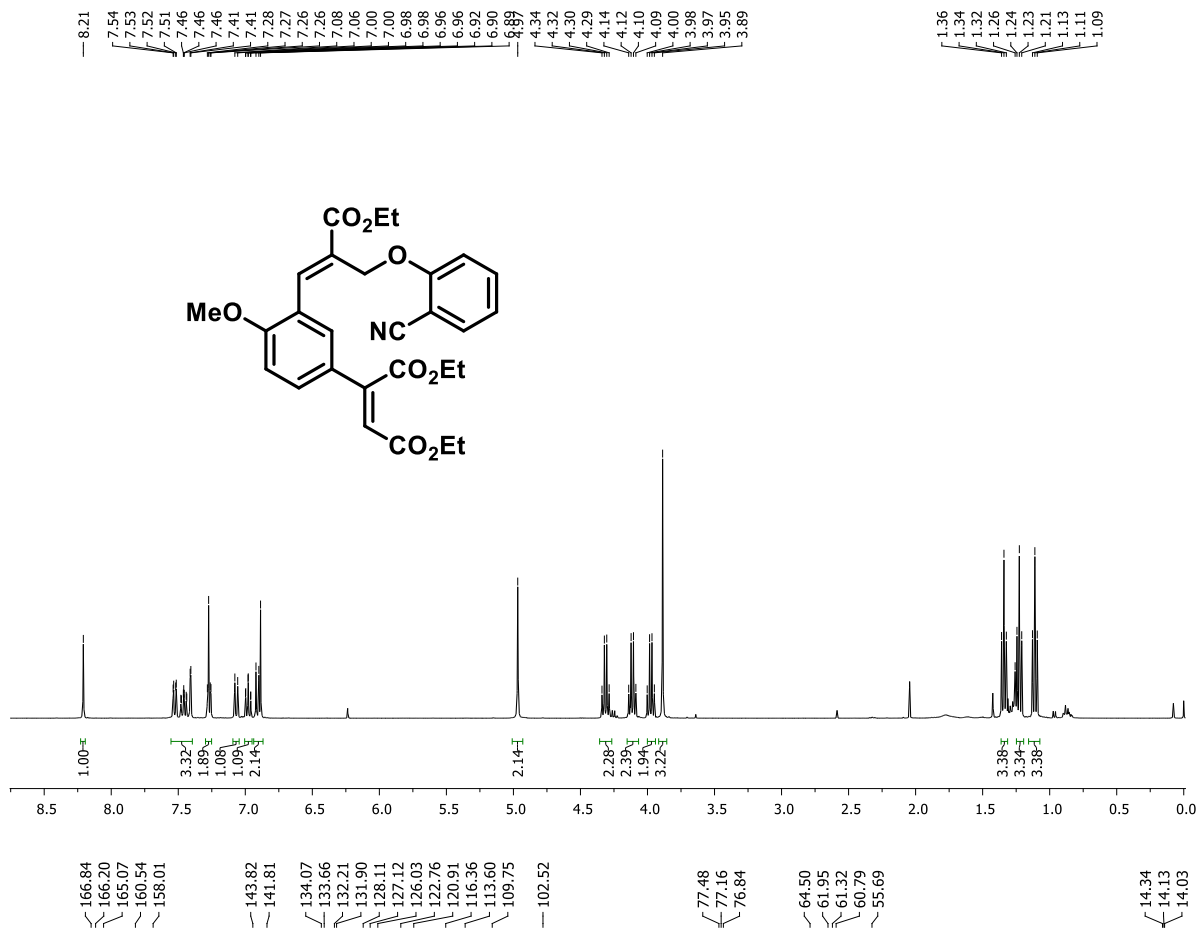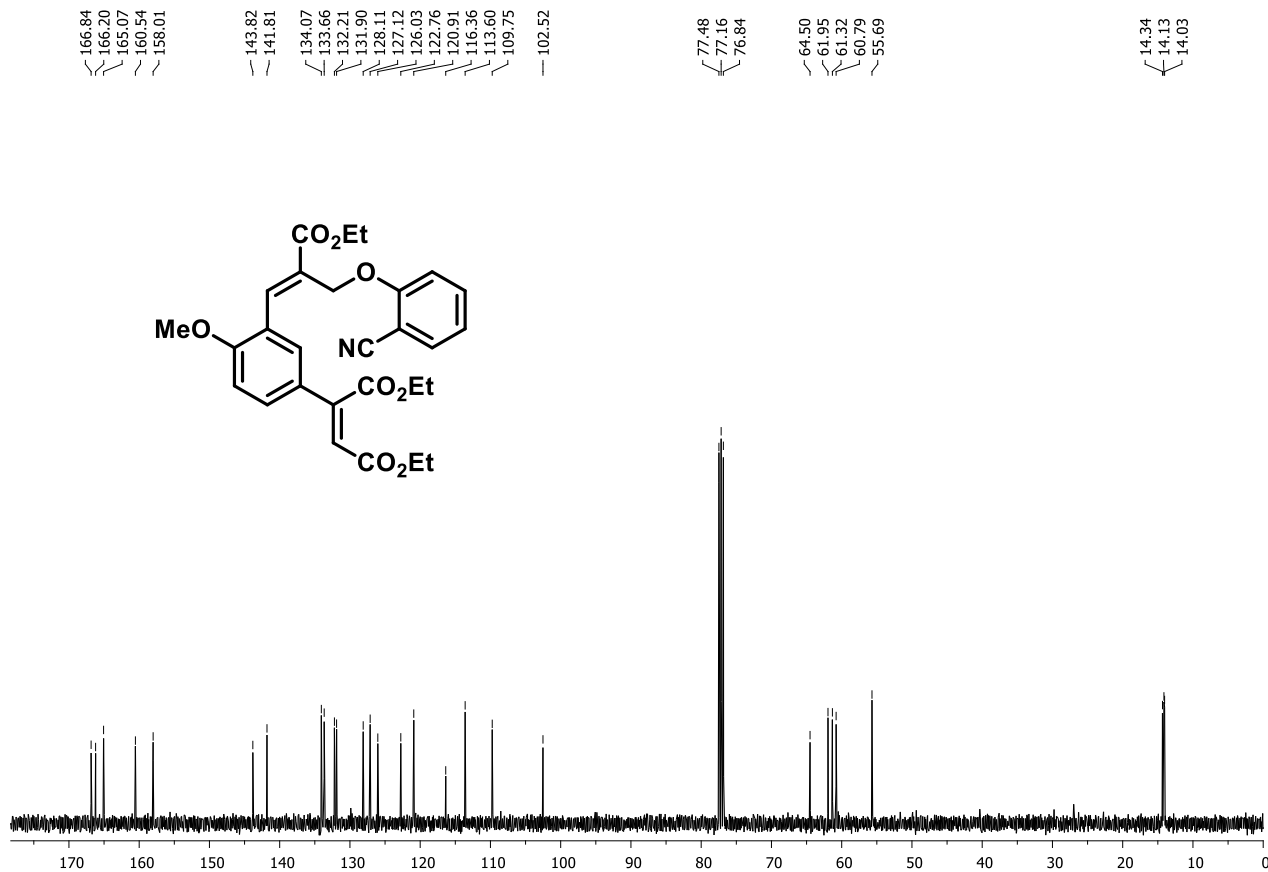

**Dimethyl 2-(4-chloro-3-((E)-2-((2-cyanophenoxy)methyl)-3-methoxy-3-oxoprop-1-en-1-yl)phenyl)maleate (6i)**

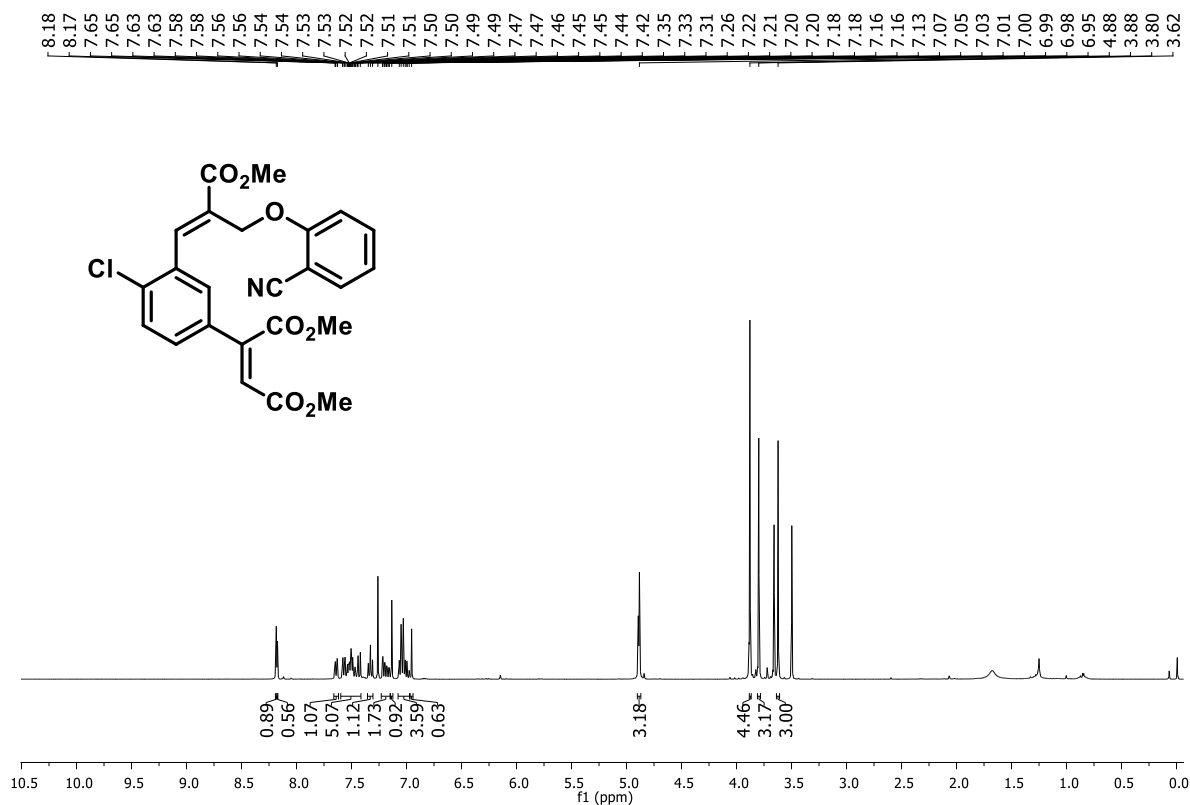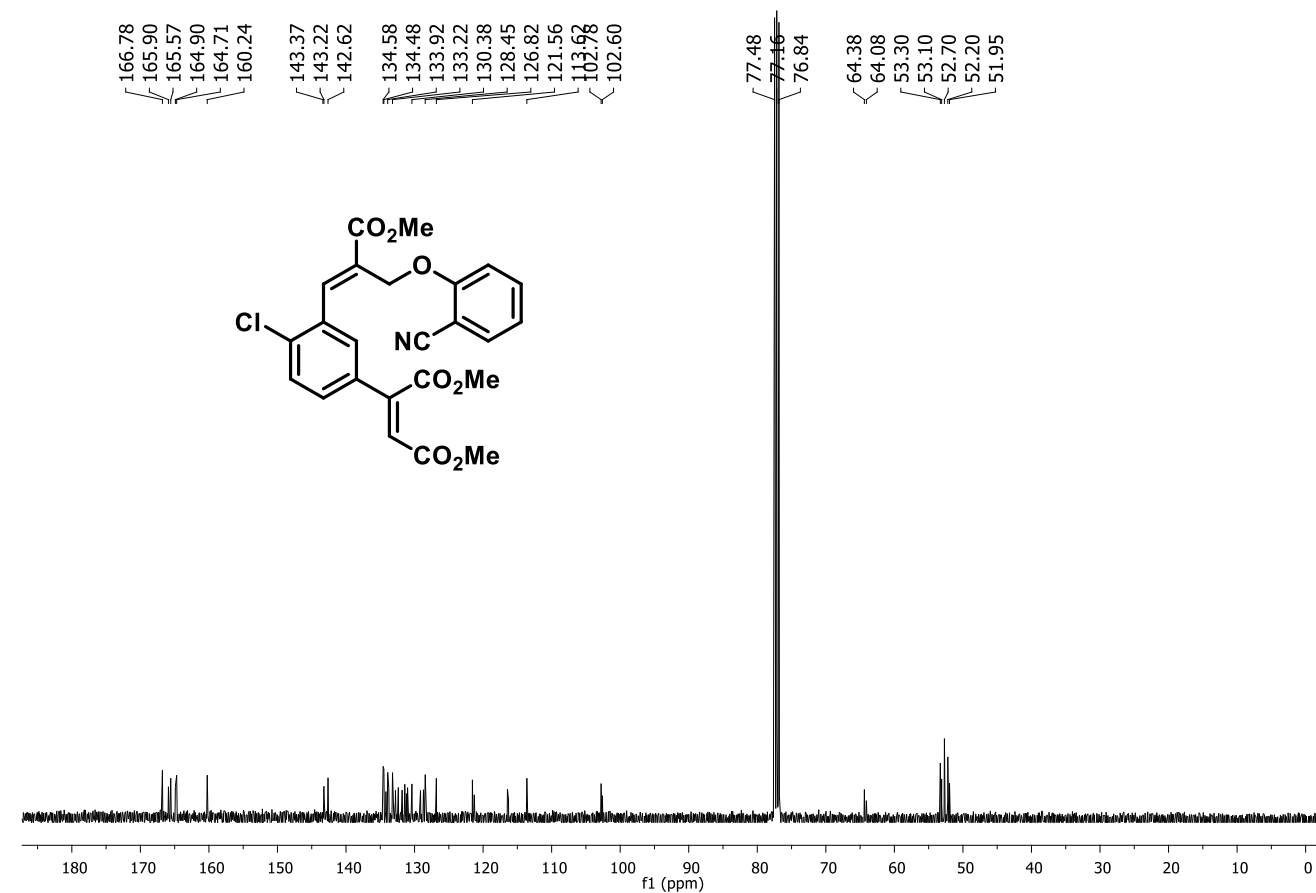

**Dimethyl 2-(2-chloro-5-((*E*)-2-((2-cyanophenoxy)methyl)-3-methoxy-3-oxoprop-1-en-1-yl)phenyl) maleate (6j)**

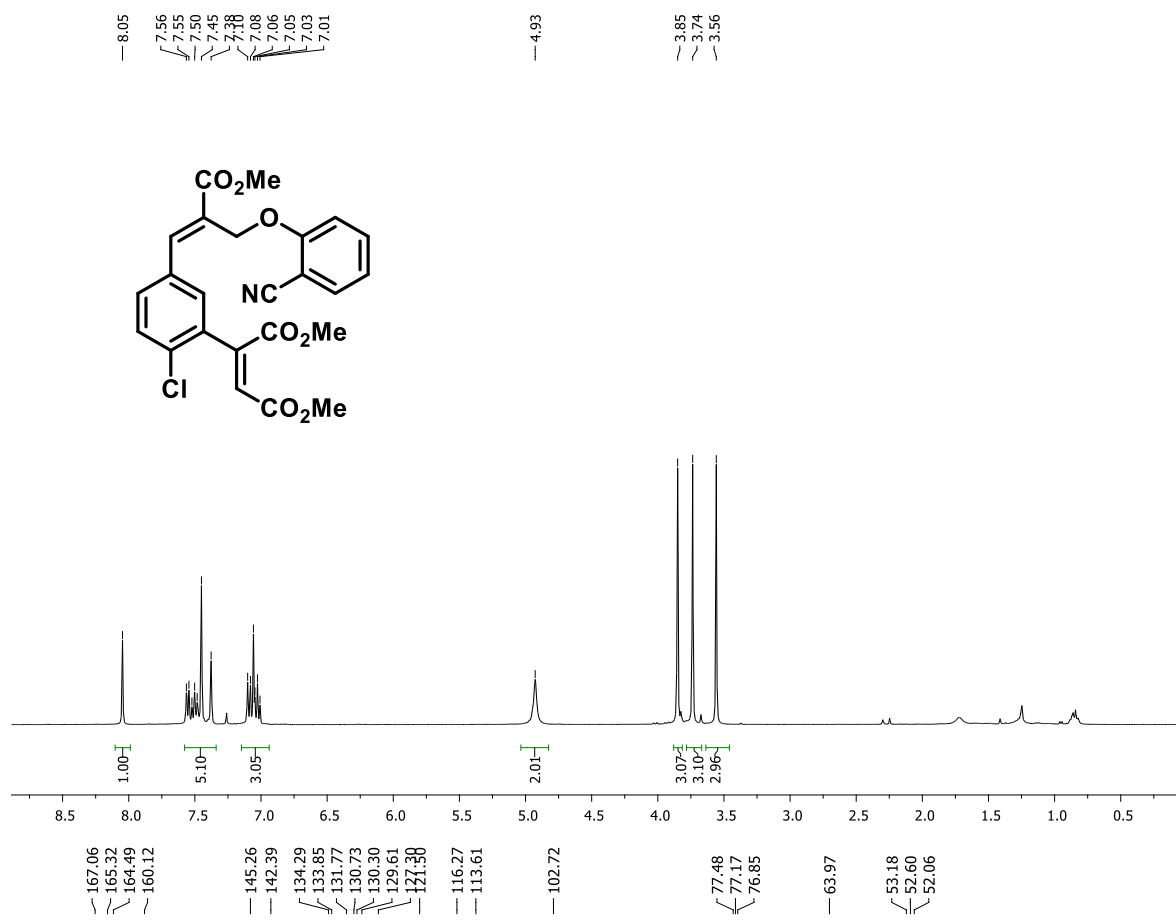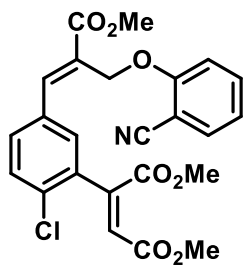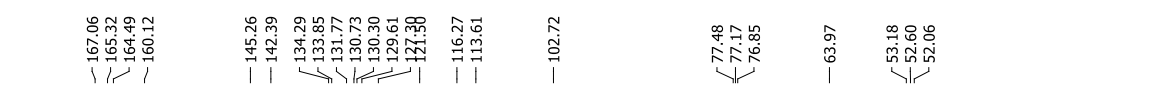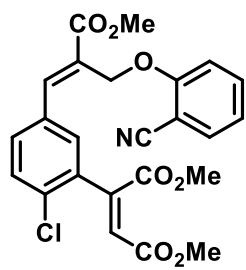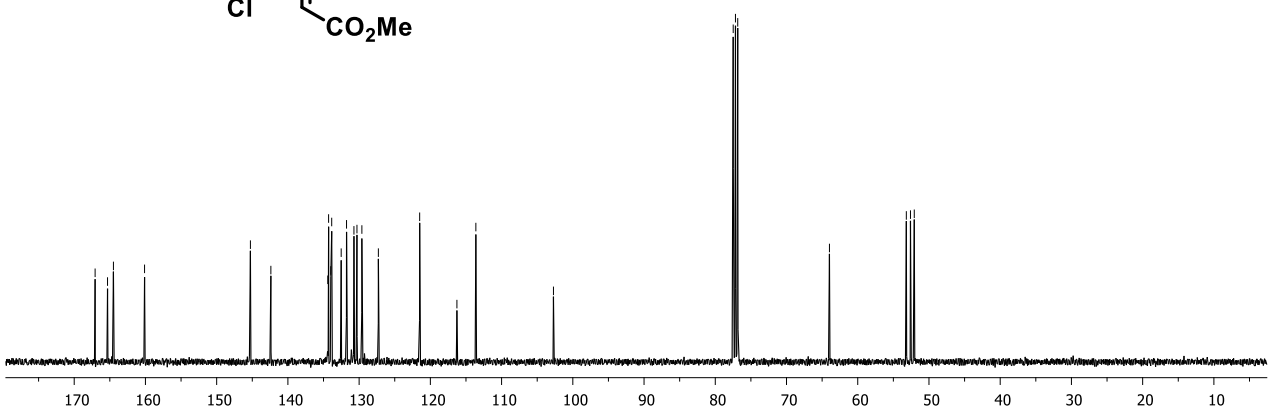

Dimethyl  
maleate (6k)

2-(5-((E)-2-((2-cyanophenoxy)methyl)-3-methoxy-3-oxoprop-1-en-1-yl)-2-methylphenyl)

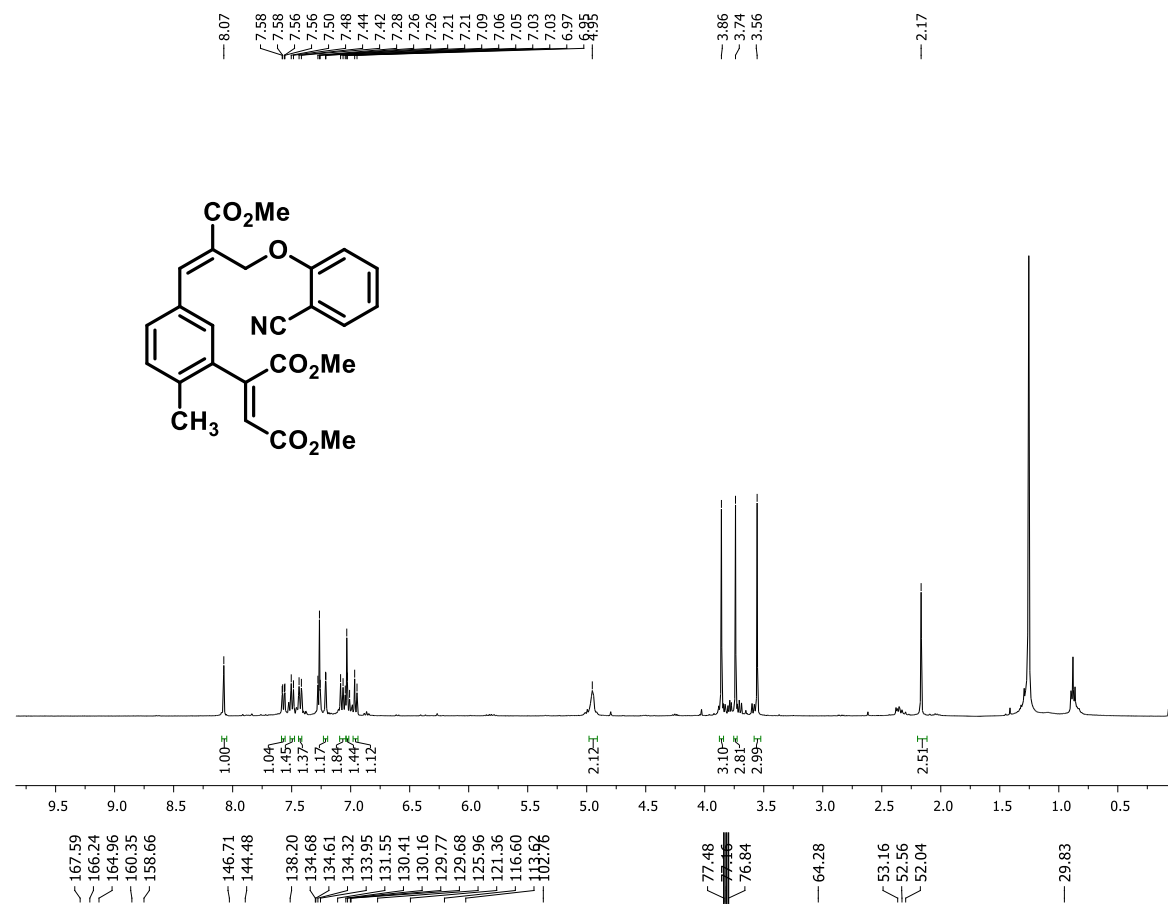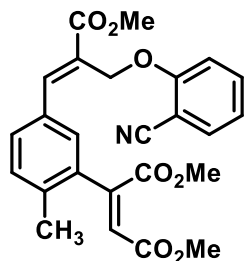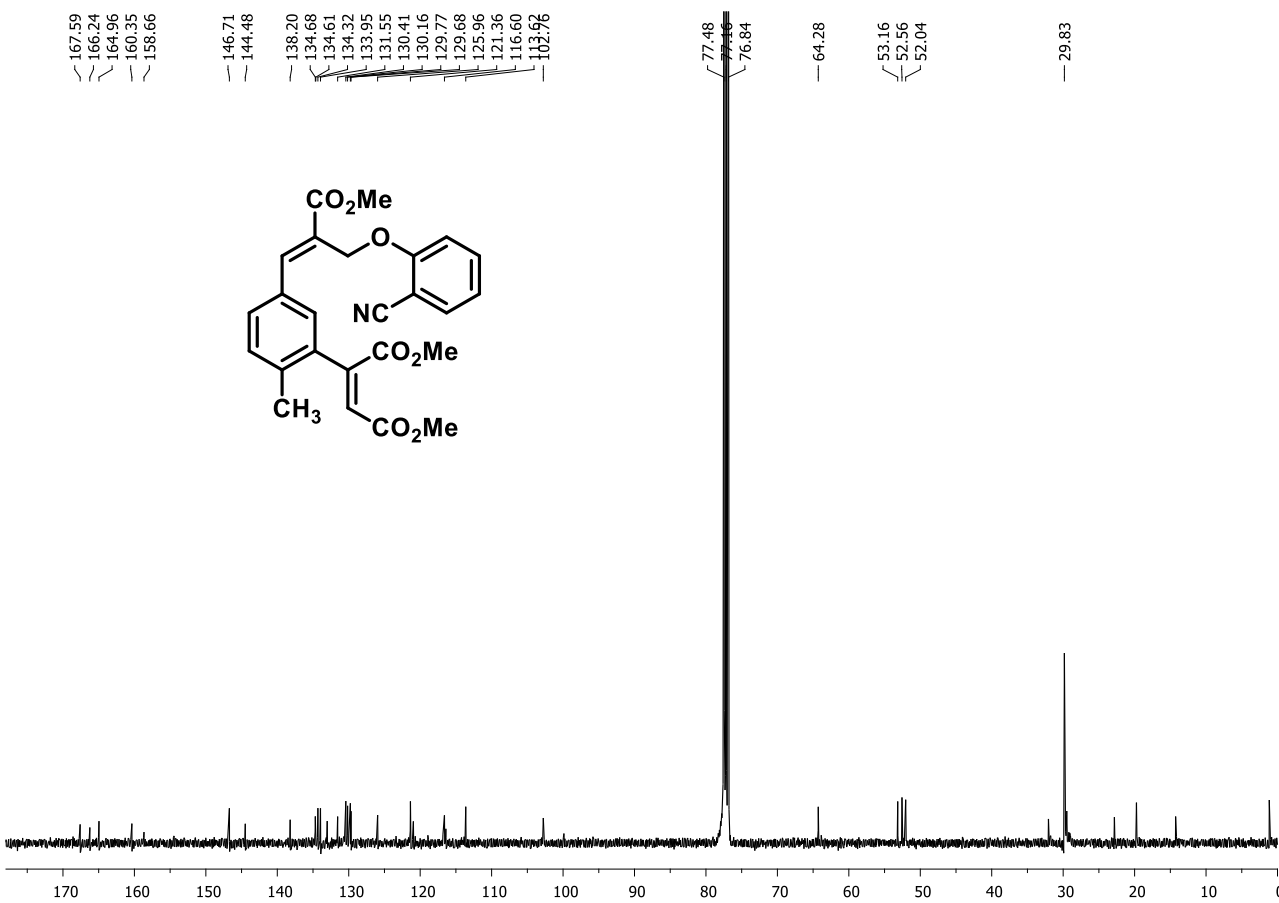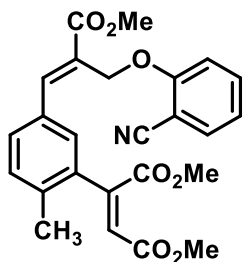



**Dimethyl 2-(5-((E)-2-((2-cyanophenoxy)methyl)-3-methoxy-3-oxoprop-1-en-1-yl)-2-ethylphenyl) maleate (6l)**

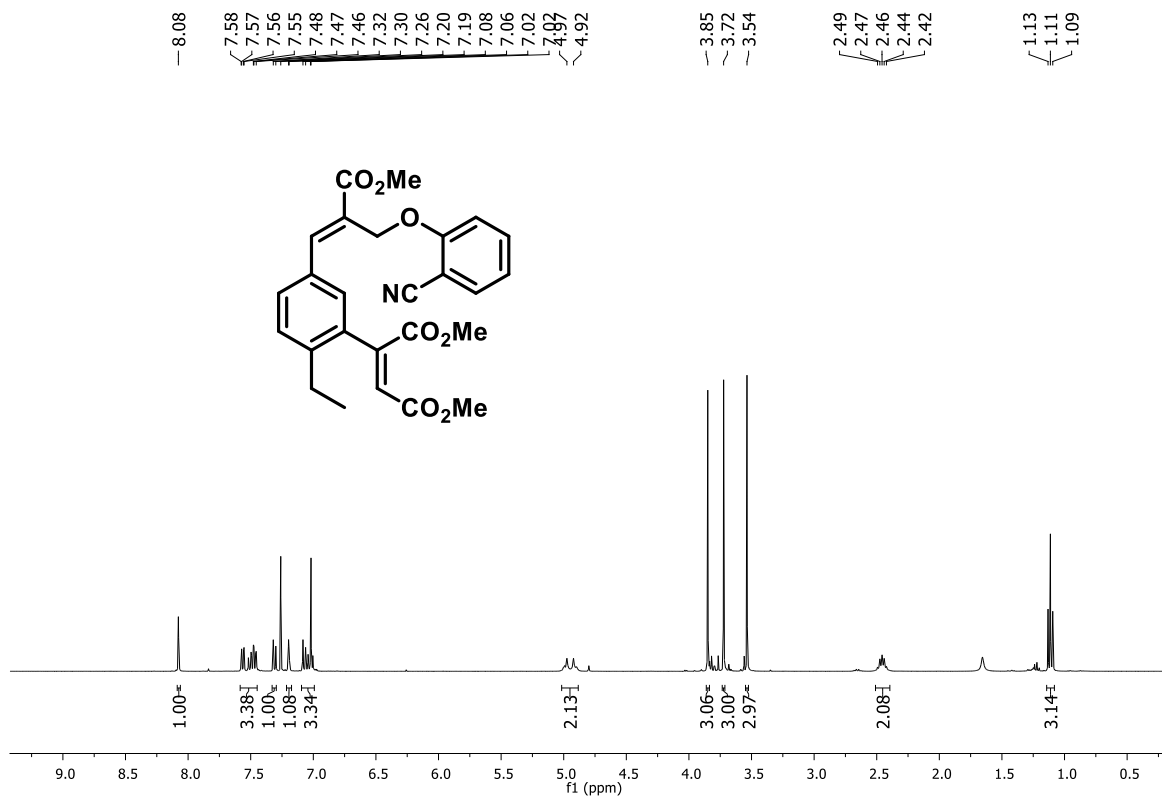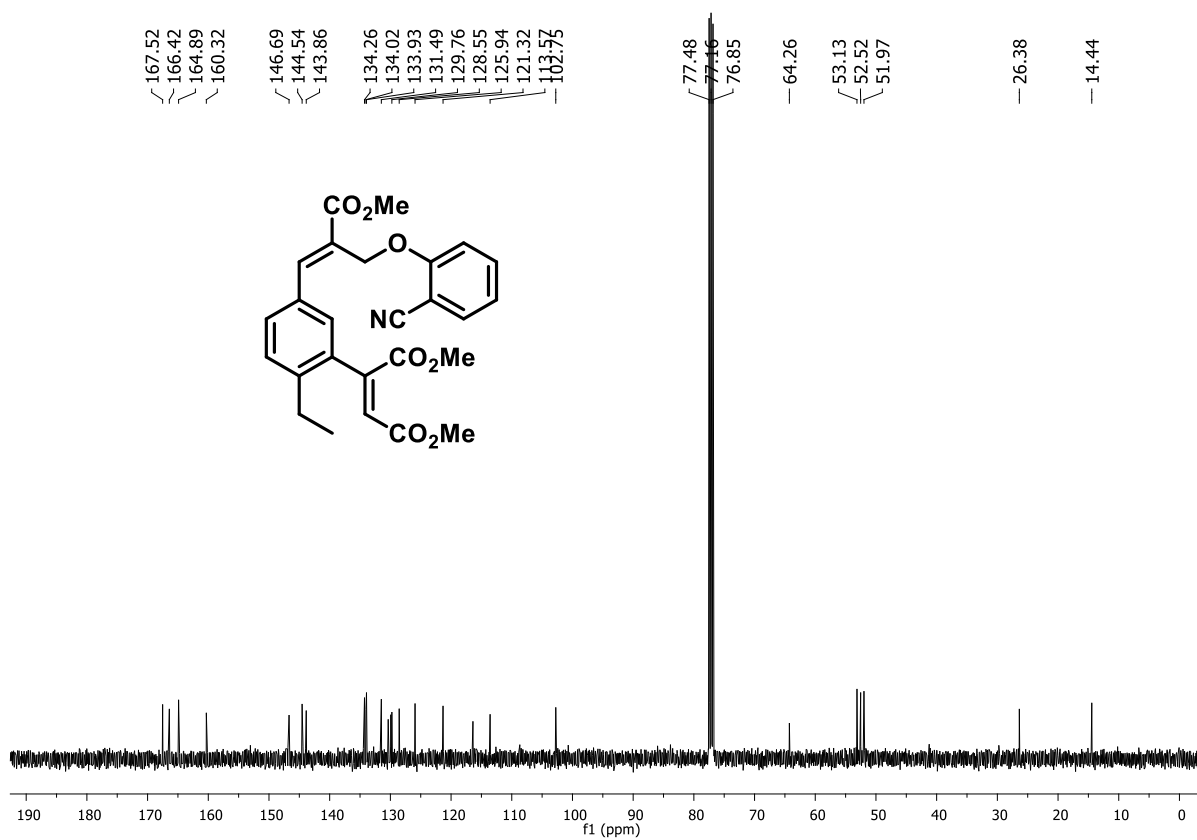

**Diethyl 2-(5-((E)-2-((2-cyanophenoxy)methyl)-3-methoxy-3-oxoprop-1-en-1-yl)-2-methoxyphenyl)maleate (6m)**

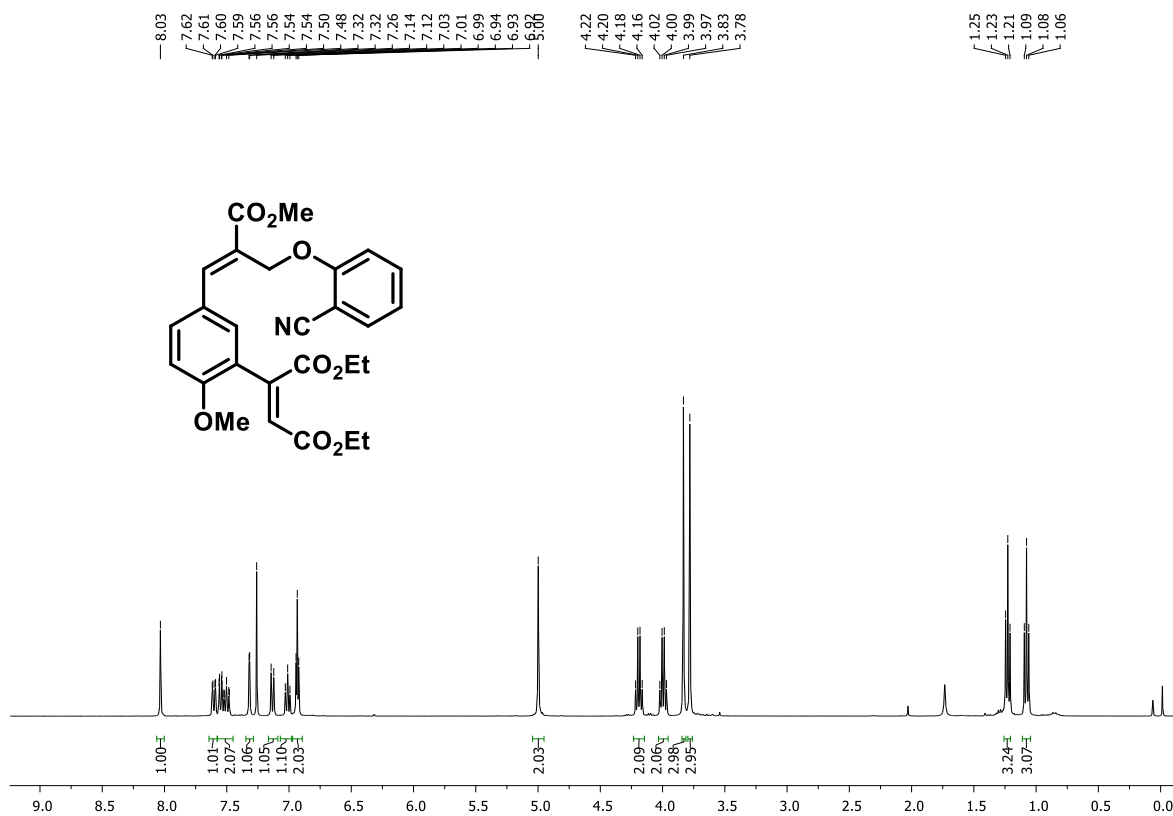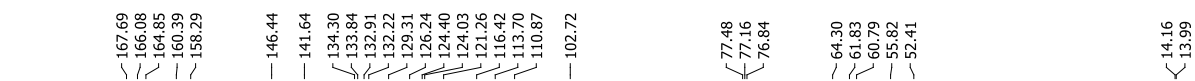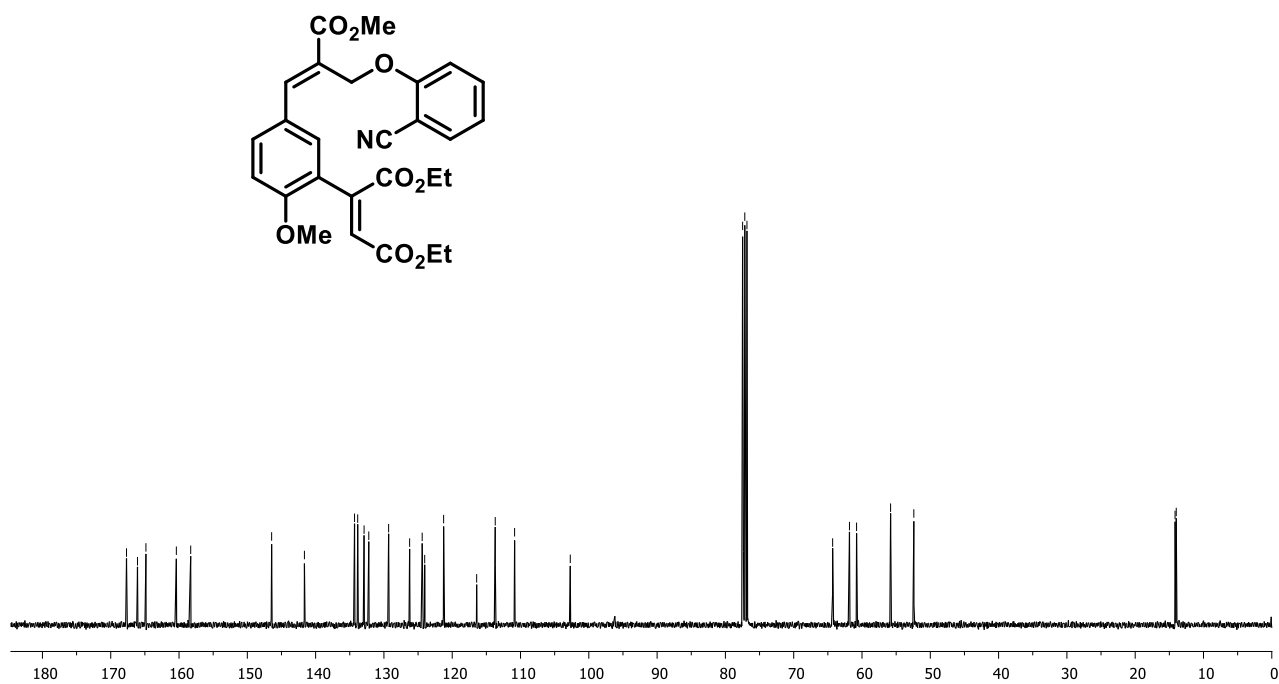

**Dimethyl 2-(6-((*E*)-2-((2-cyanophenoxy)methyl)-3-methoxy-3-oxoprop-1-en-1-yl)benzo[d][1,3]dioxol-4-yl)maleate (6n)**

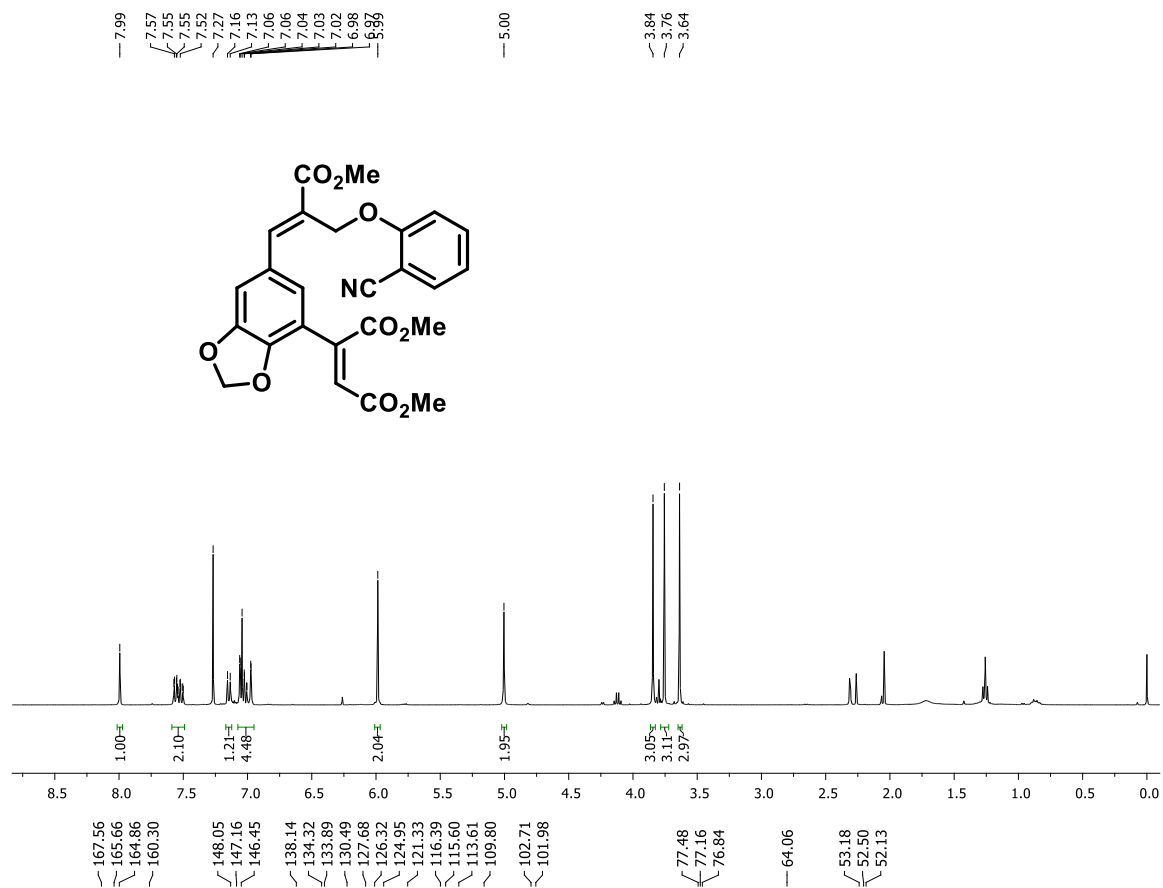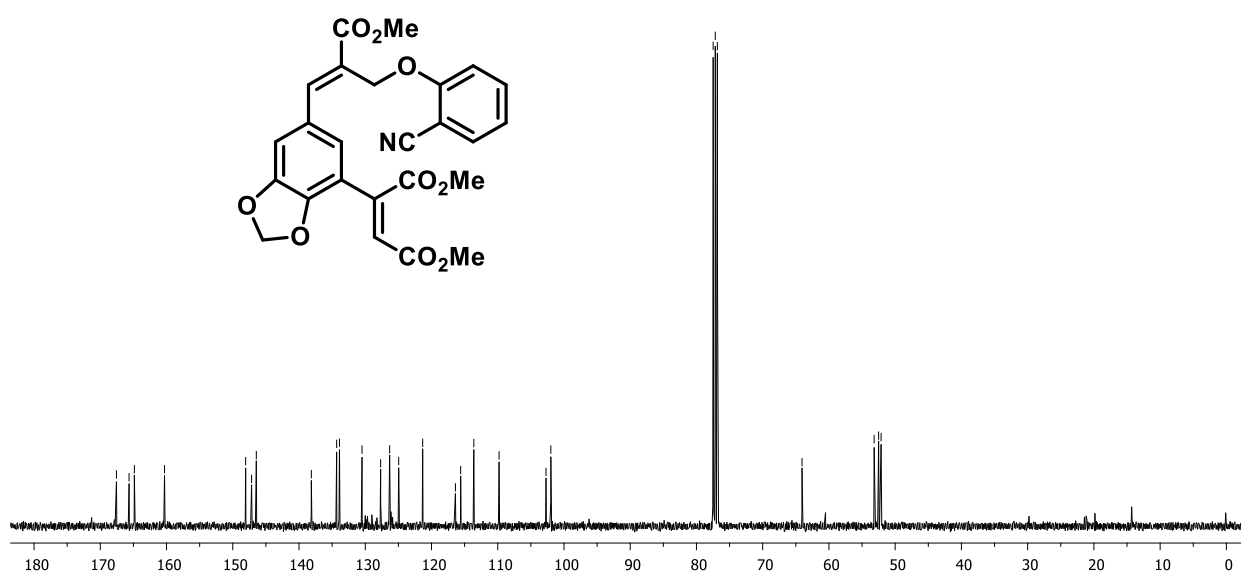

Diethyl 2-(6-((*E*)-2-((2-cyanophenoxy)methyl)-3-methoxy-3-oxoprop-1-en-1-yl)benzo[d][1,3]dioxol-4-yl)maleate (60)

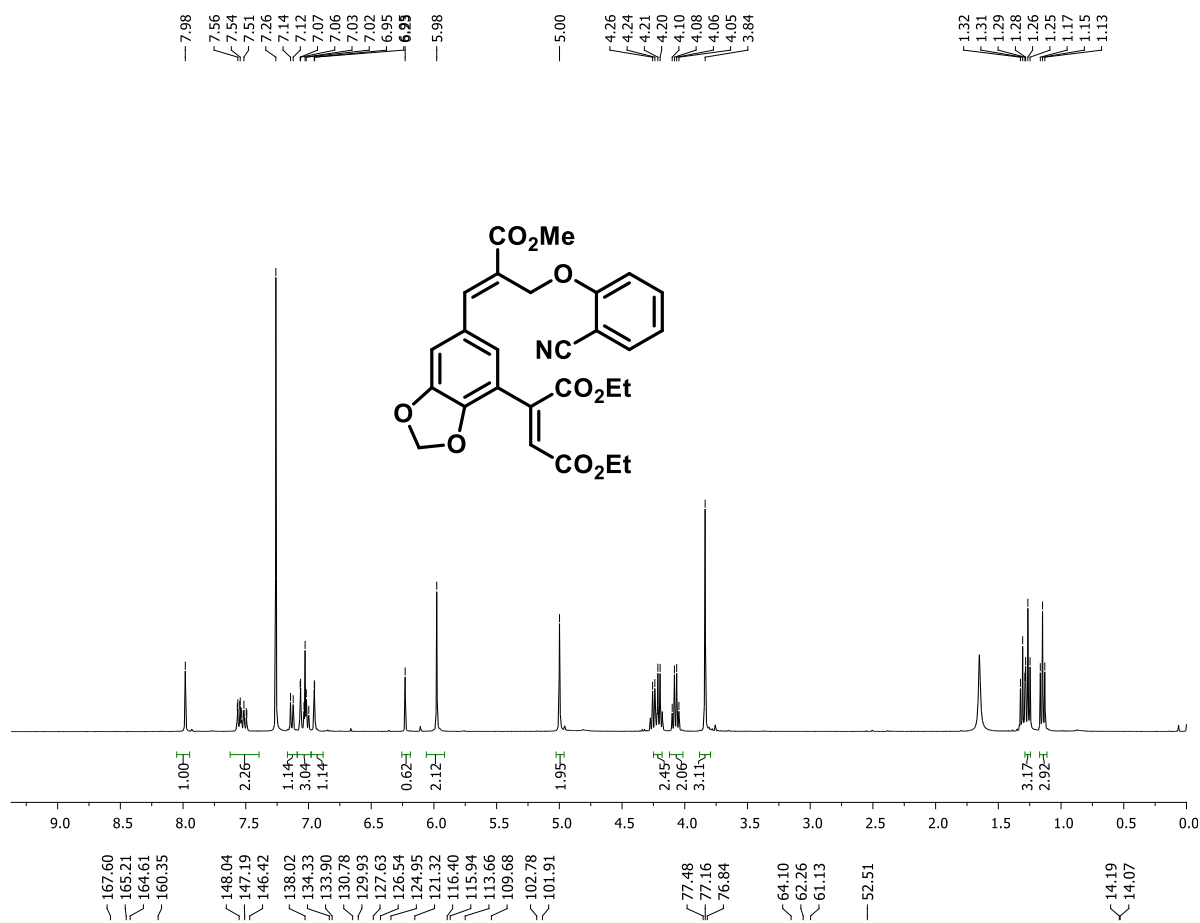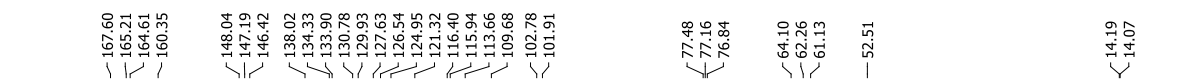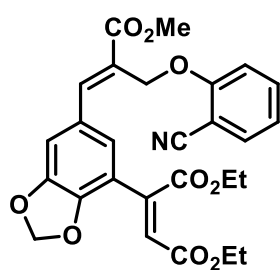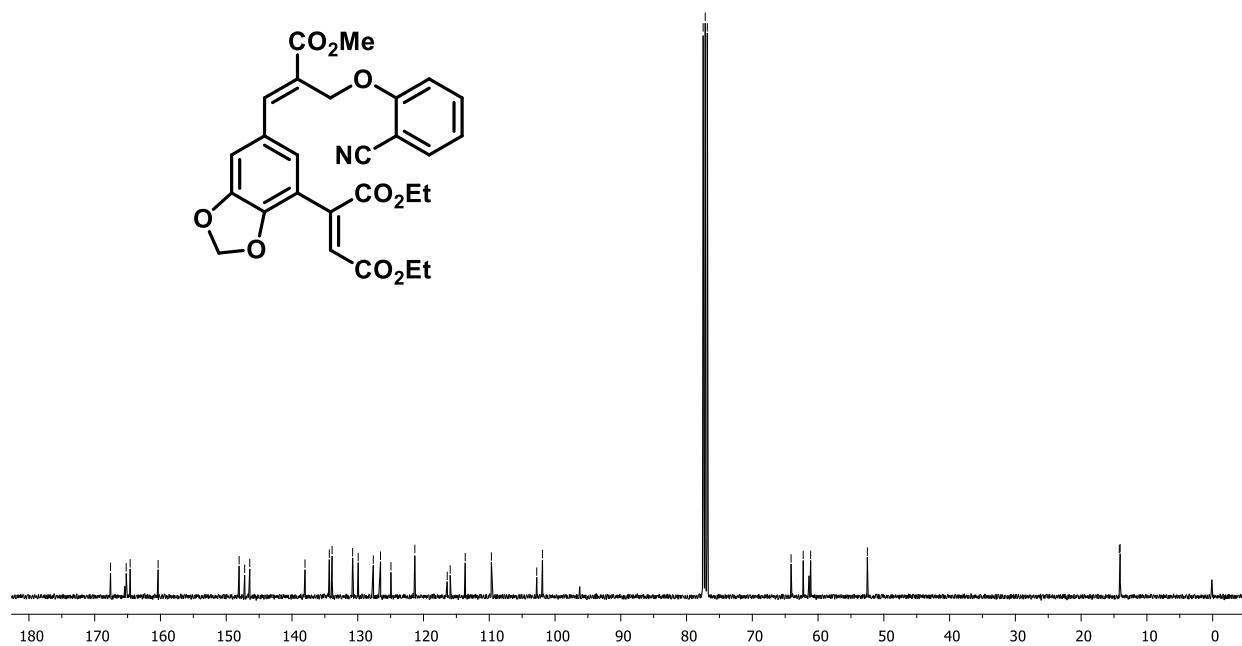

**Dibutyl 2-(6-((*E*)-2-((2-cyanophenoxy)methyl)-3-methoxy-3-oxoprop-1-en-1-yl)benzo[d][1,3]dioxol-4-yl)maleate (6p)**

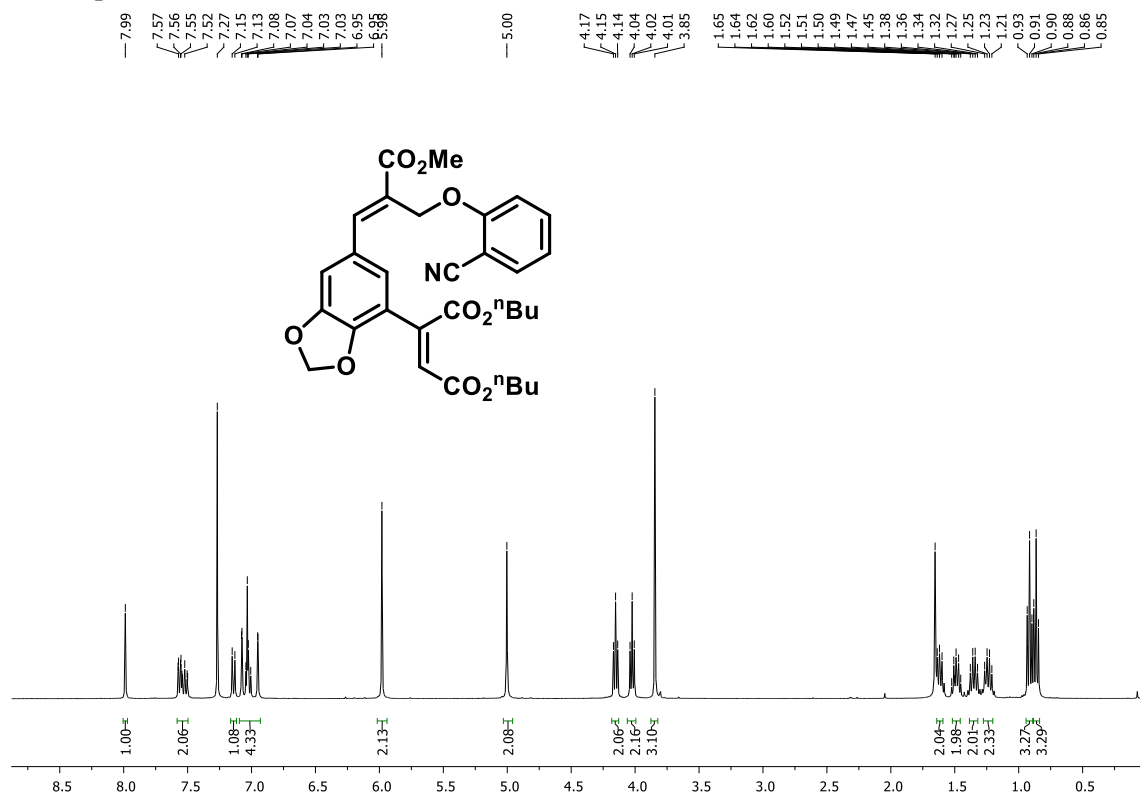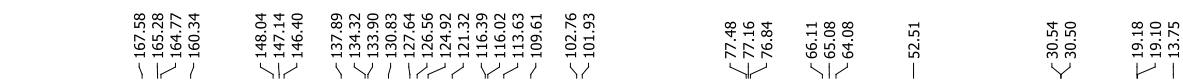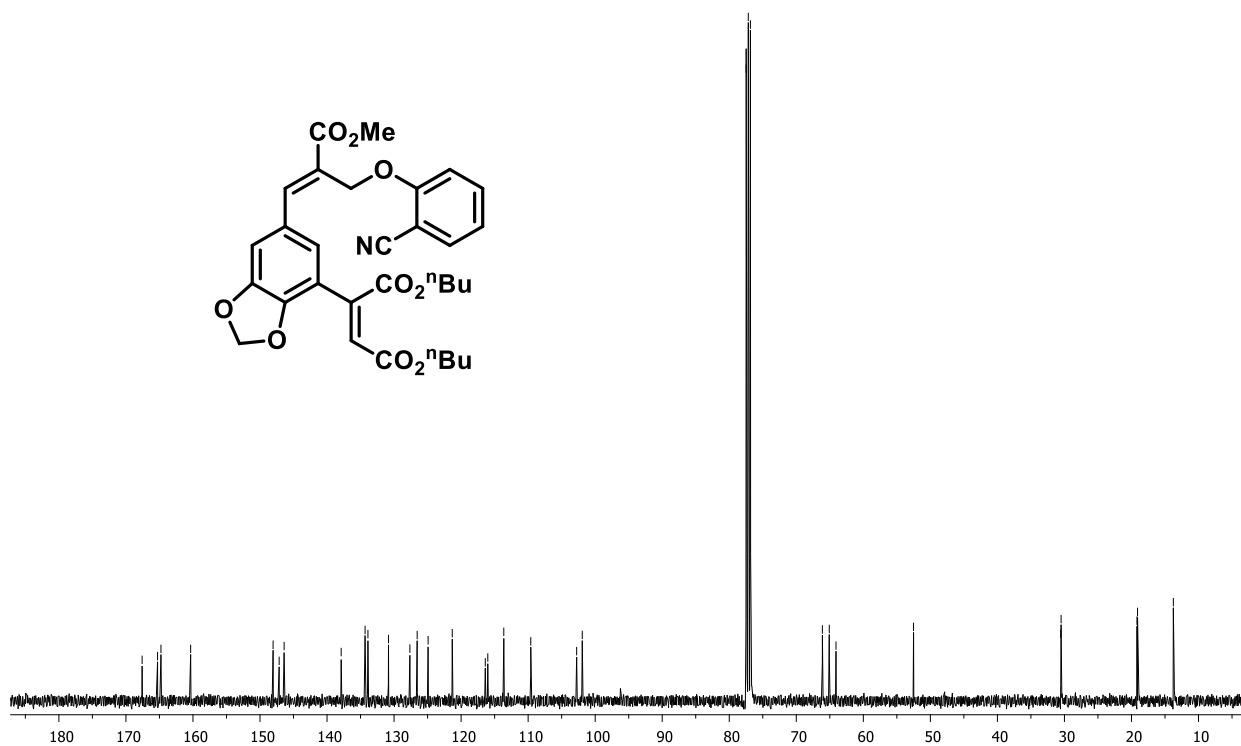

**Dimethyl 2-(5-((*E*)-2-((2-cyanophenoxy)methyl)-3-methoxy-3-oxoprop-1-en-1-yl)-2-fluorophenyl)maleate (6q)**

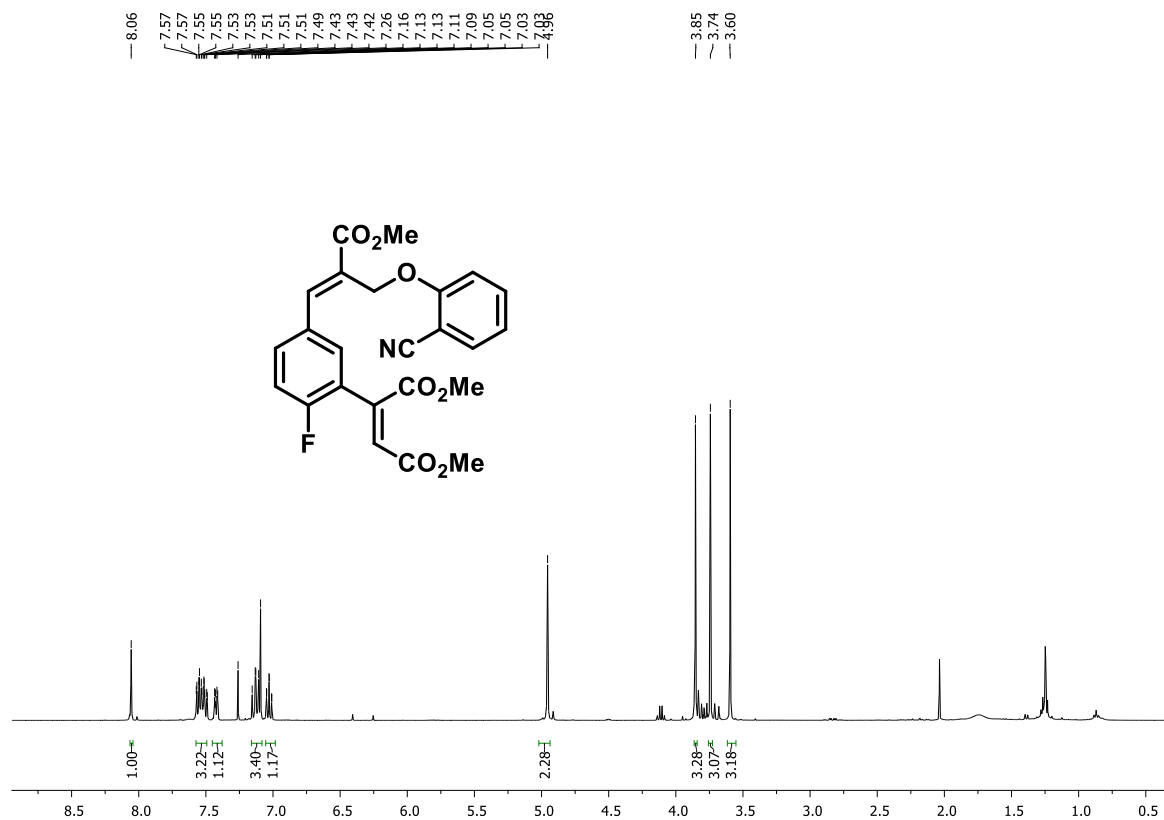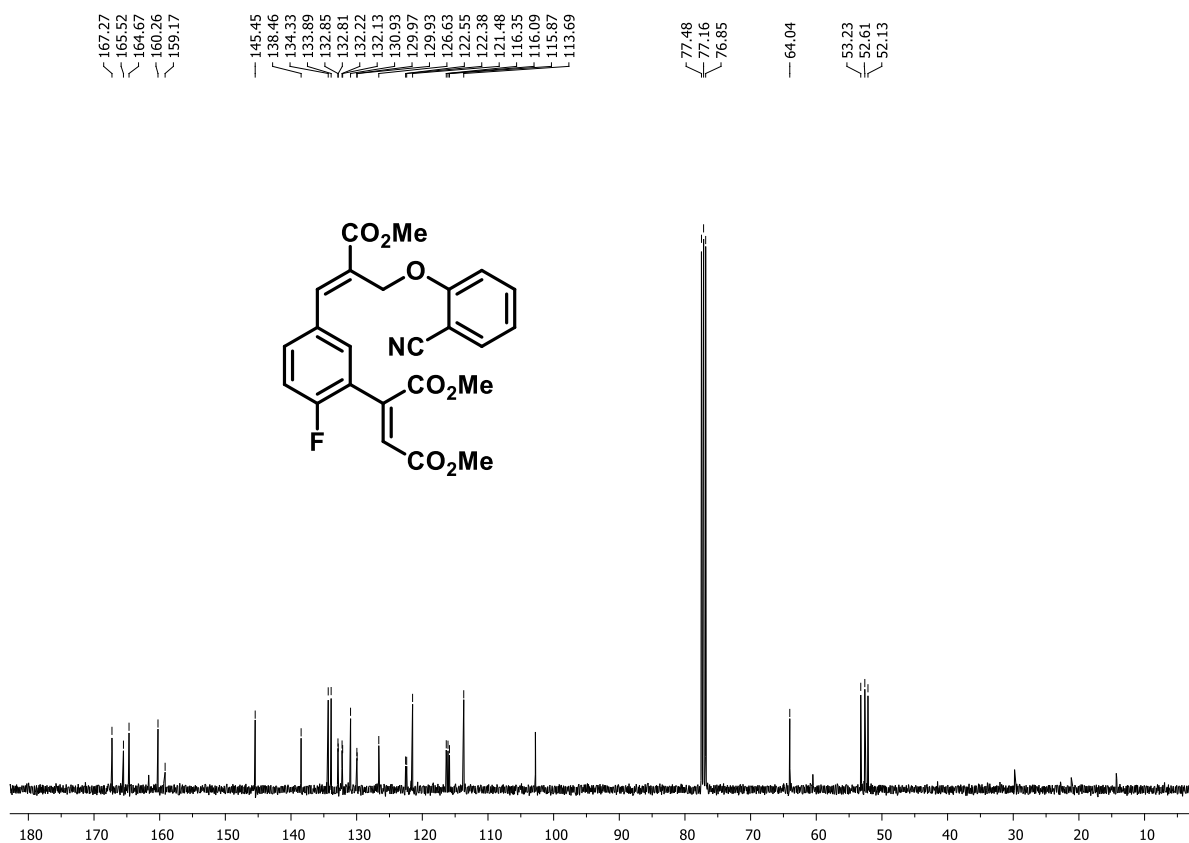

**Dibutyl 2-(5-((E)-2-((2-cyanophenoxy)methyl)-3-methoxy-3-oxoprop-1-en-1-yl)-2-fluorophenyl) maleate (6r)**

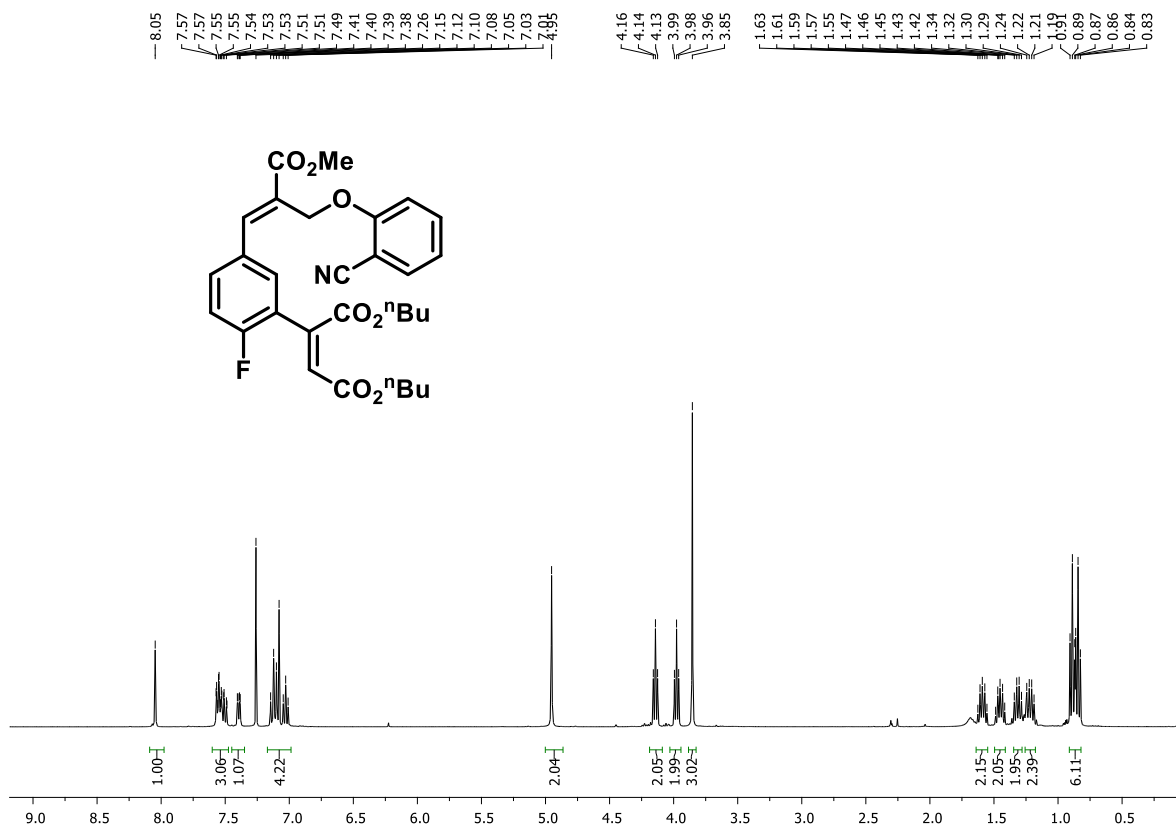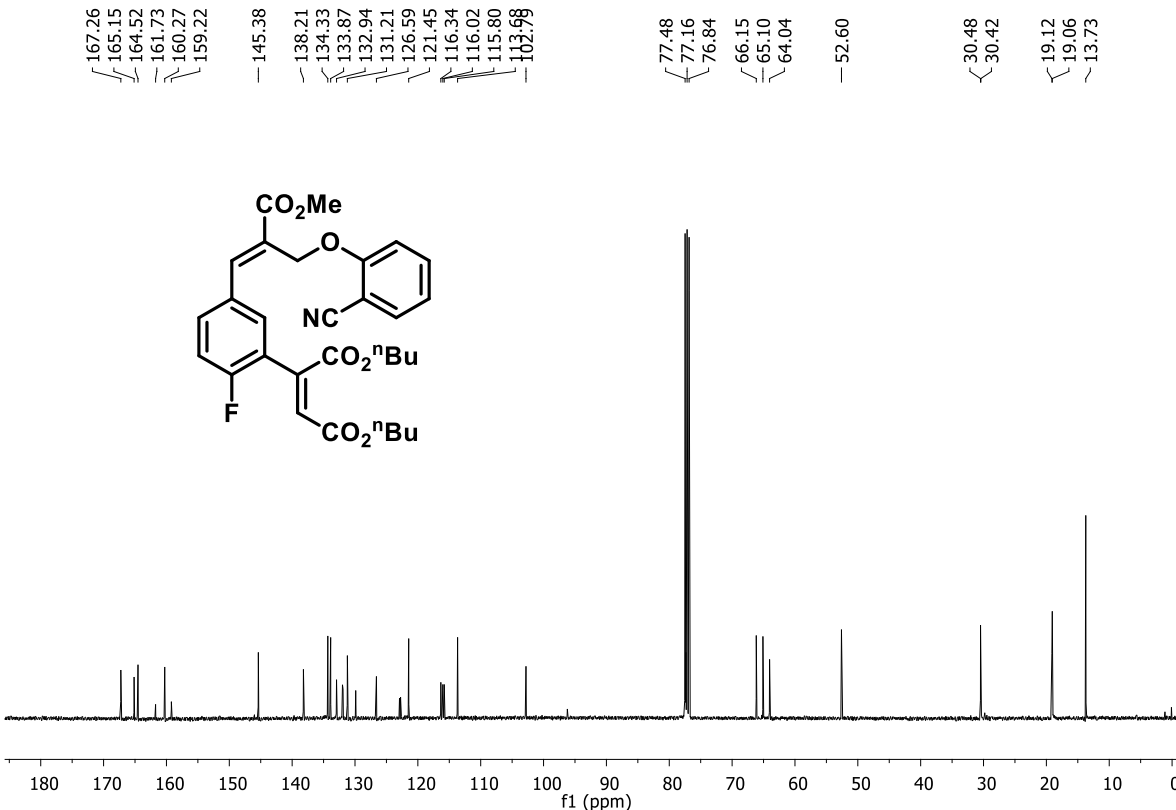

**Methyl (E)-2-((2-cyanophenoxy) methyl)-3-(5-((E)-3-ethoxy-3-oxoprop-1-en-1-yl) furan-2-yl)acrylate (8a)**

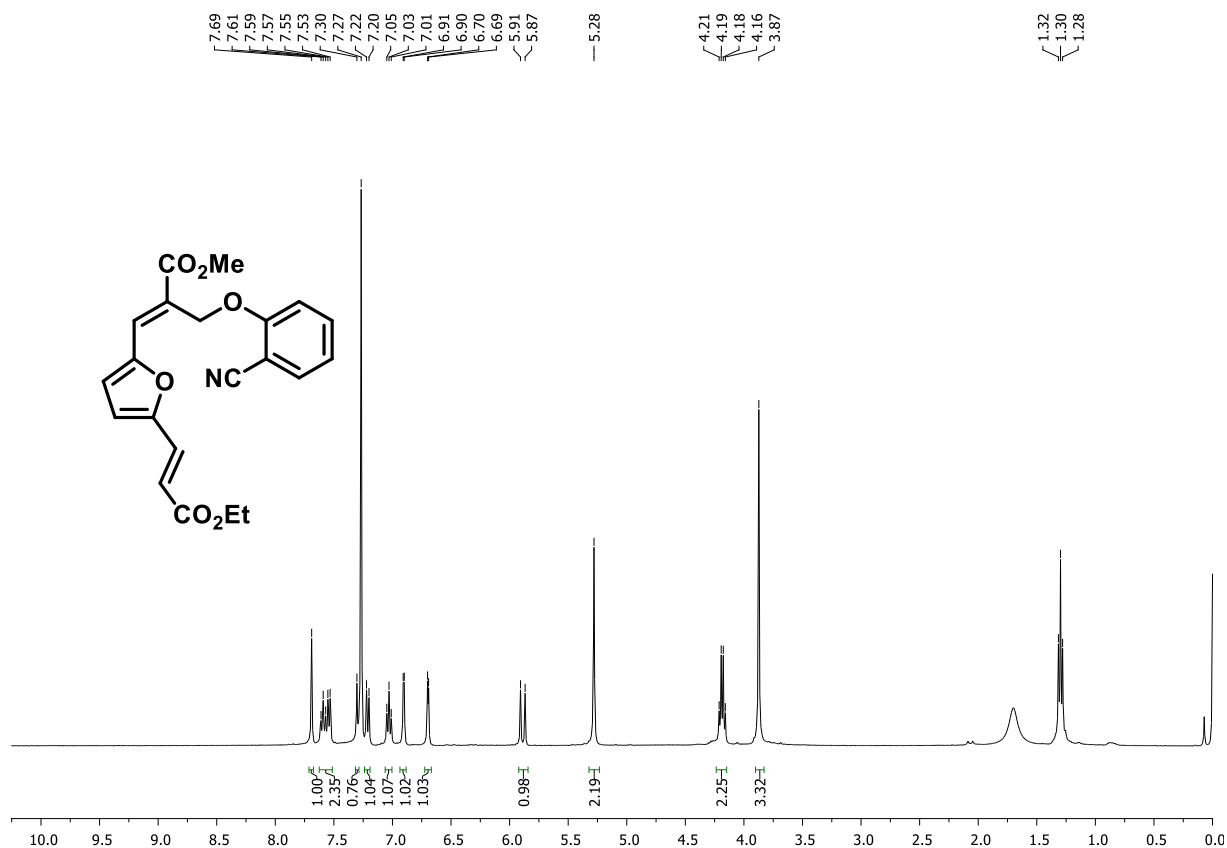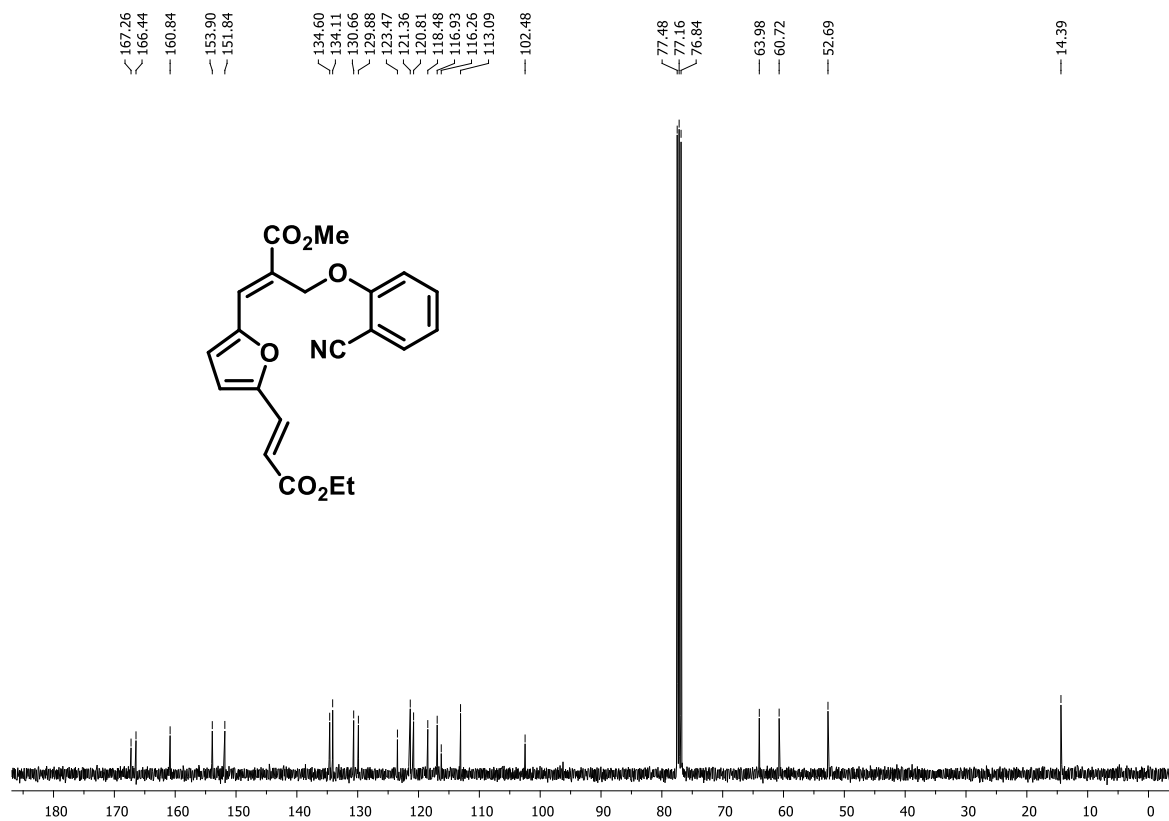



**Methyl (E)-2-((2-cyanophenoxy) methyl)-3-(5-((E)-3-oxo-3-phenoxyprop-1-en-1-yl)furan-2-yl)acrylate (8b)**

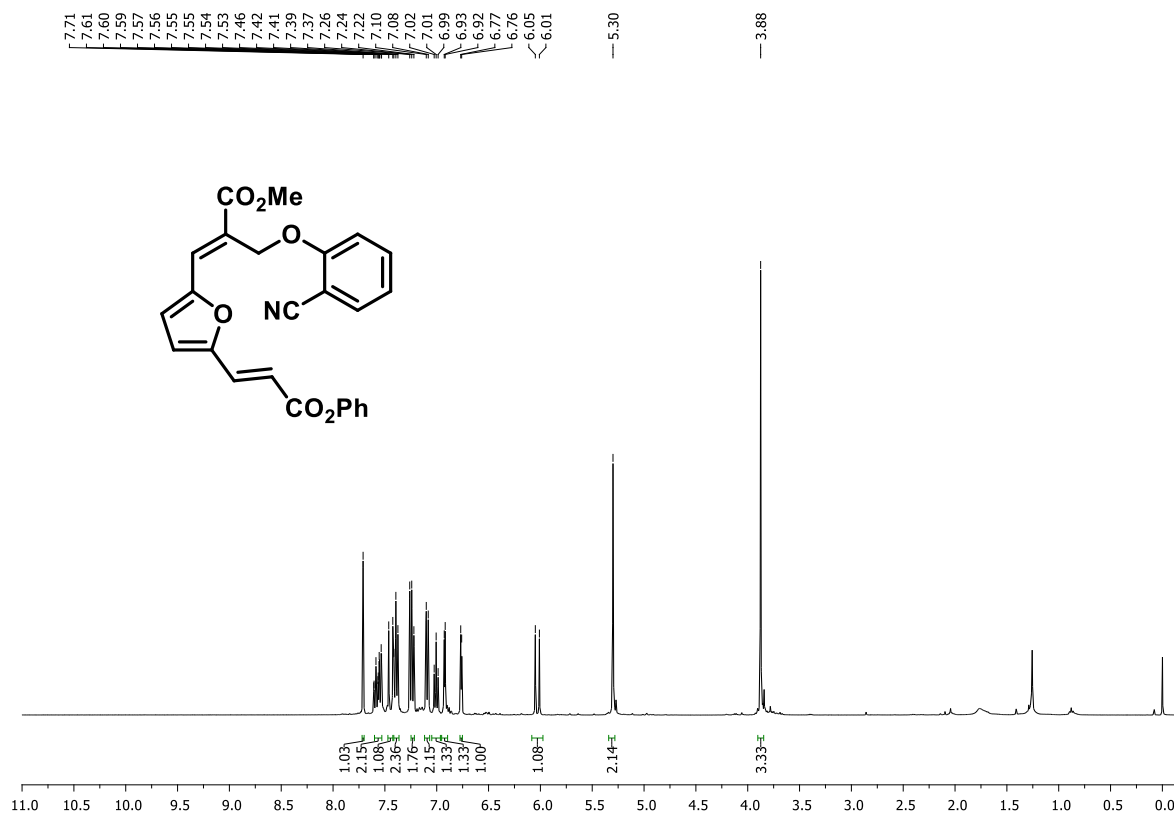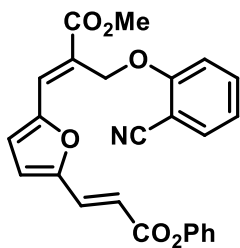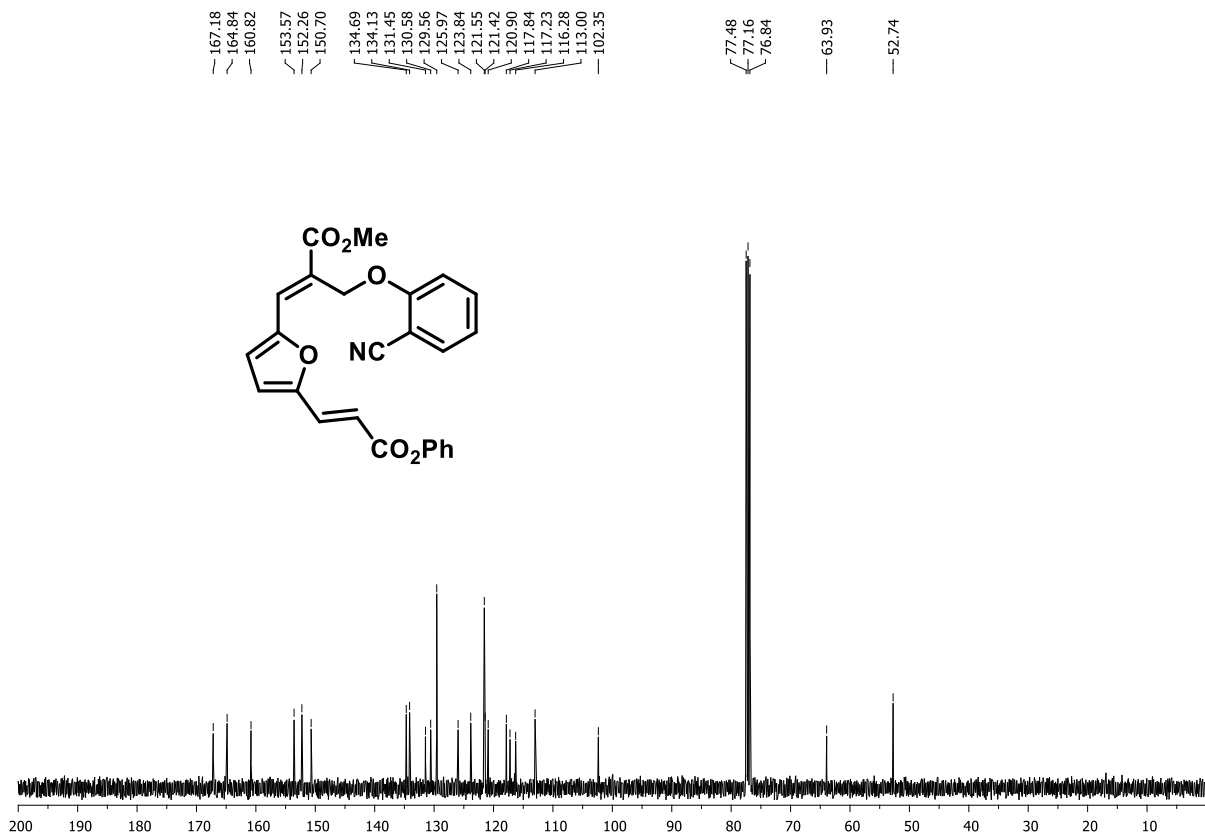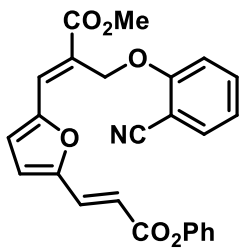

**Methyl (E)-2-((2-cyanophenoxy)methyl)-3-(5-((E)-3-((7,7-dimethylbicyclo [2.2.1] heptan-2-yl)oxy)-3-oxoprop-1-en-1-yl)furan-2-yl)acrylate (8c)**

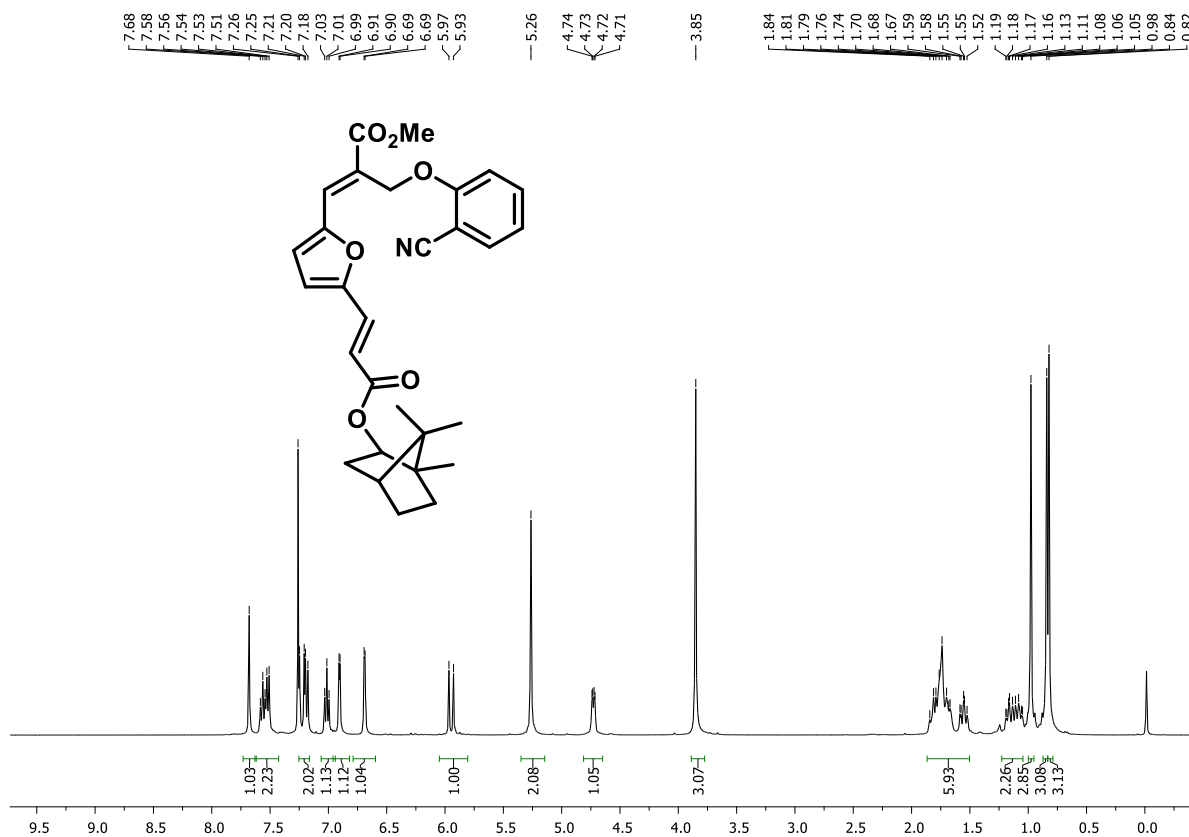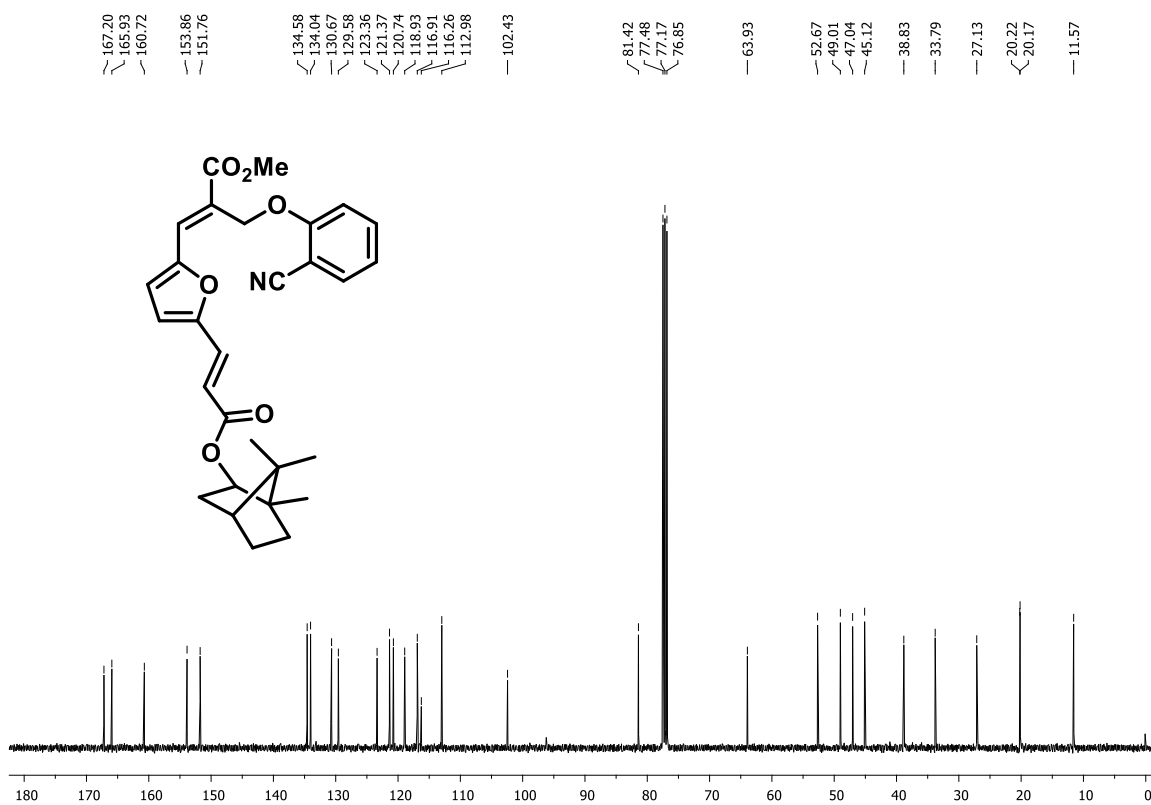

**Methyl (*E*)-2-((2-cyanophenoxy) methyl)-3-(5-((*E*)-3-((2-ethylhexyl) oxy)-3-oxoprop-1-en-1-yl)furan-2-yl)acrylate (8d)**

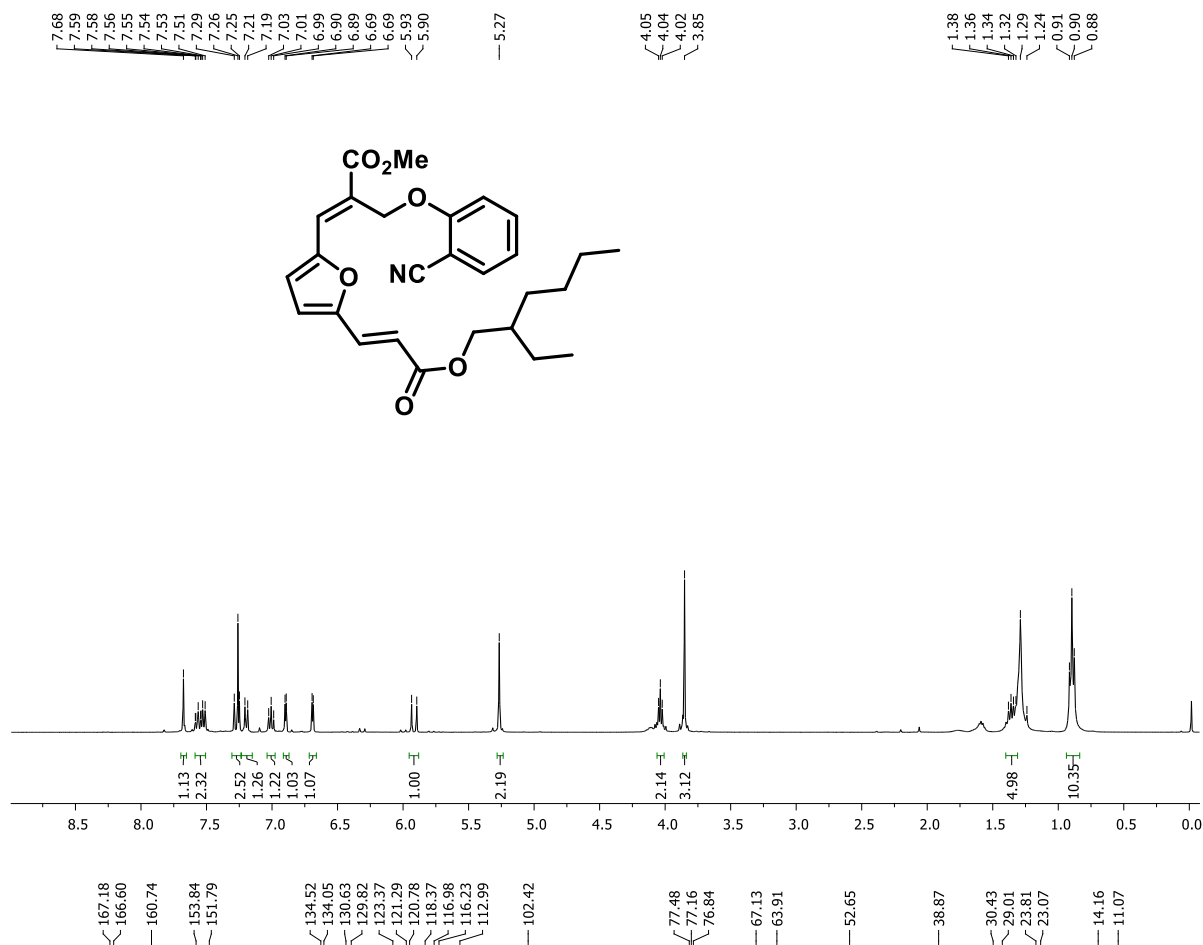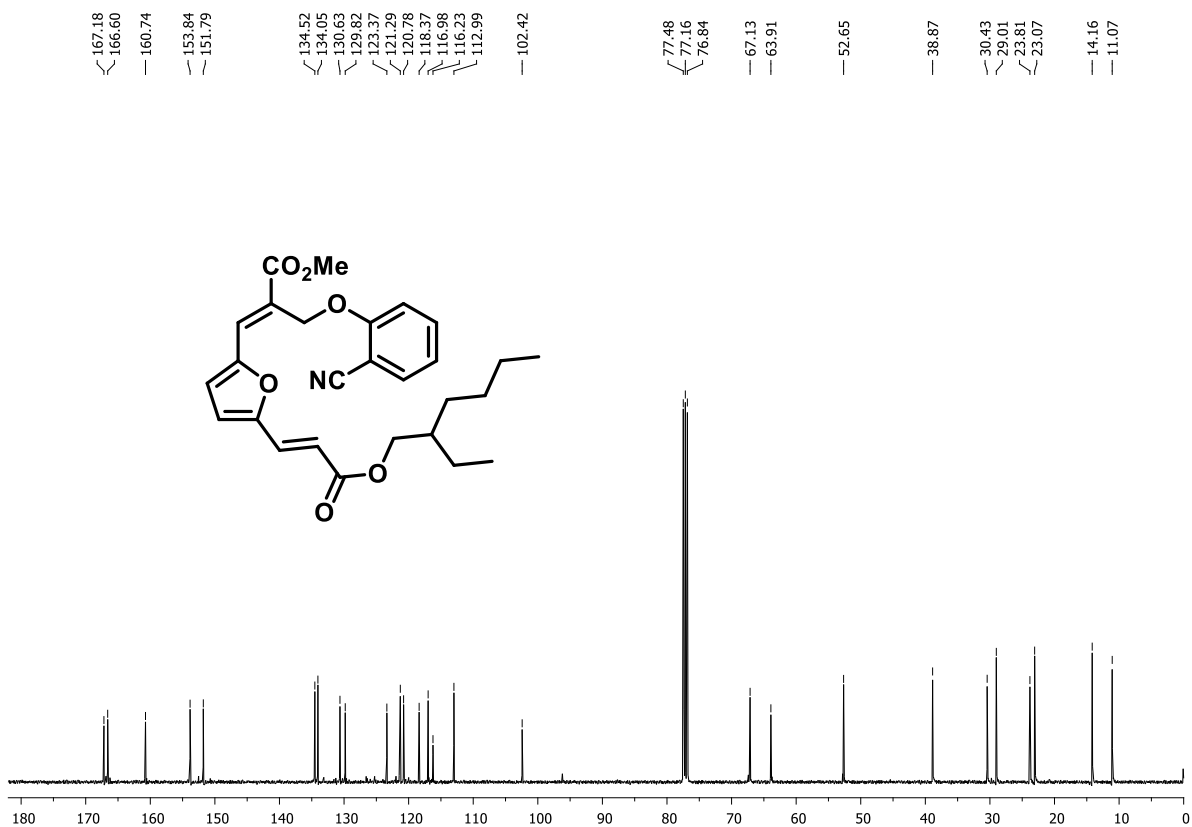

Methyl (*E*)-2-((2-cyanophenoxy)methyl)-3-(5-((*Z*)-3-oxo-1-phenylprop-1-en-1-yl)furan-2-yl)acrylate (**8e**)

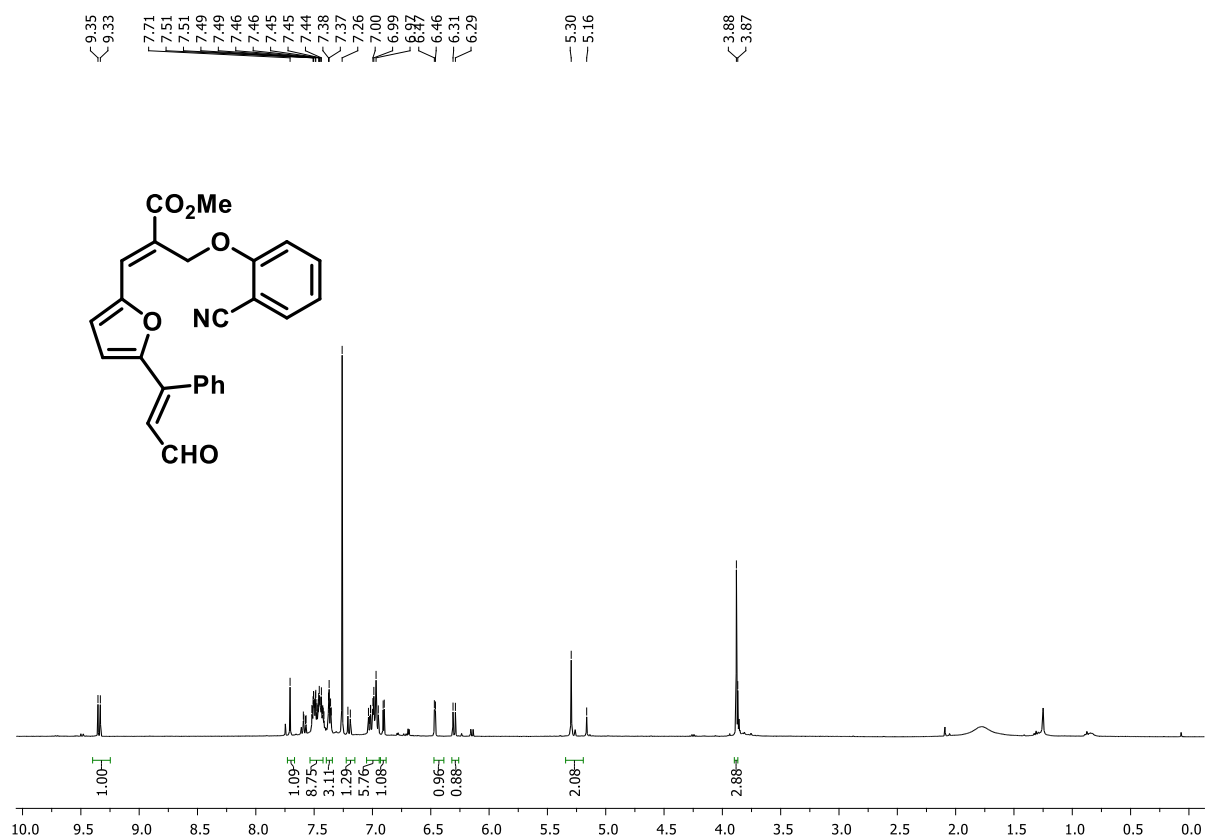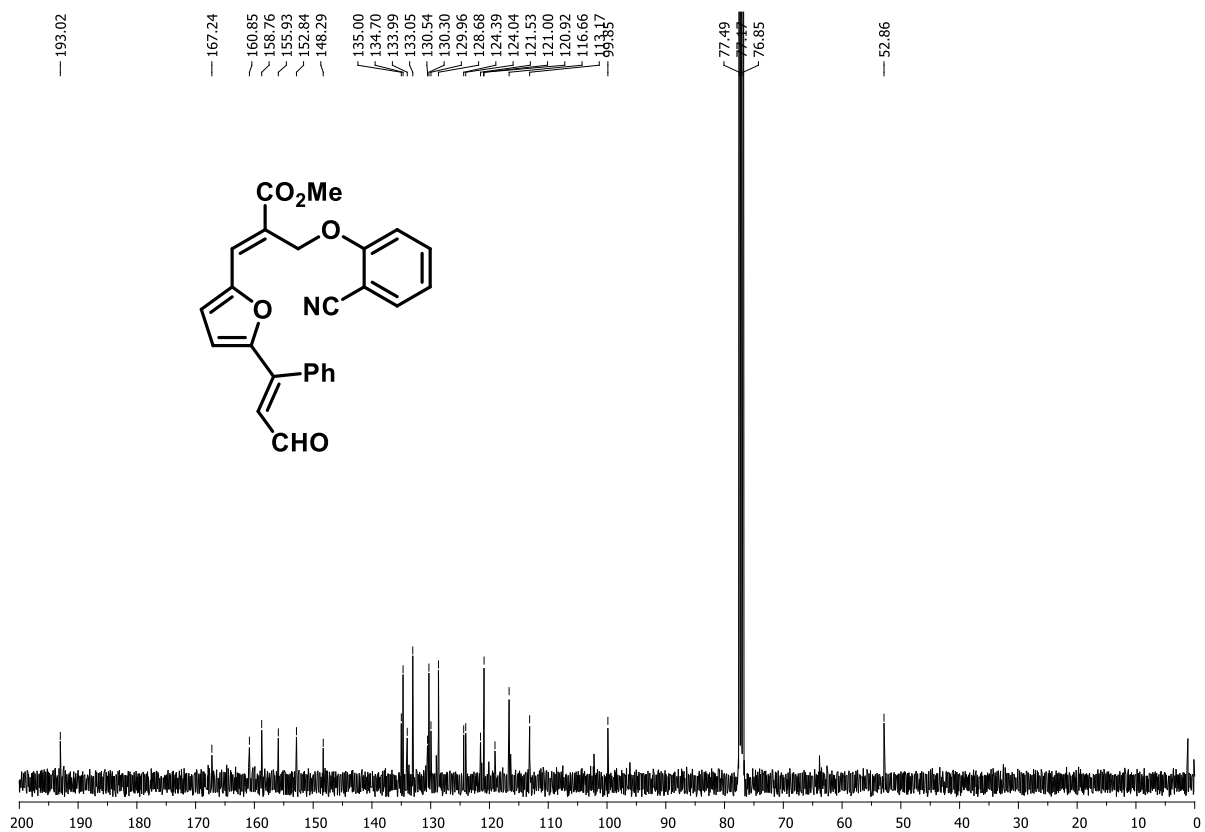

Methyl (*E*)-2-((2-cyanophenoxy)methyl)-3-(5-((*Z*)-3-methoxy-3-oxo-1-phenylprop-1-en-1-yl)furan-2-yl)acrylate (**8f**)

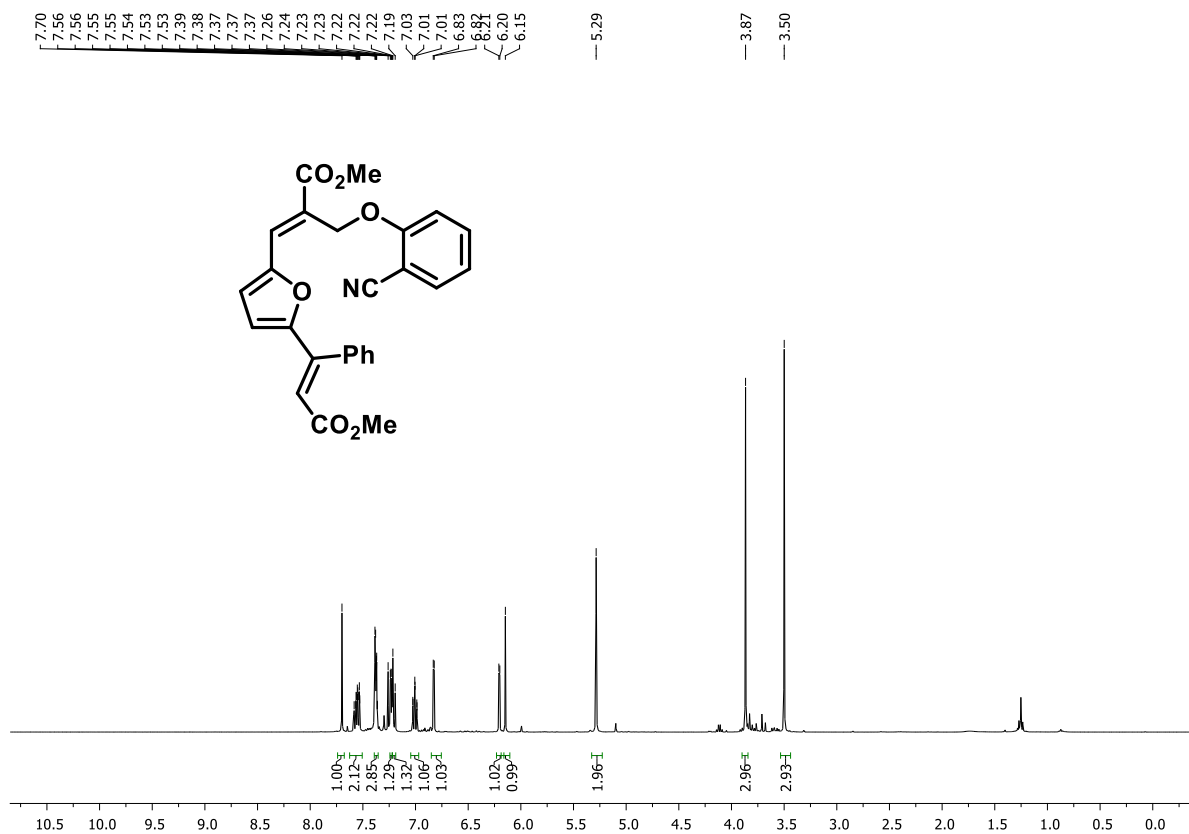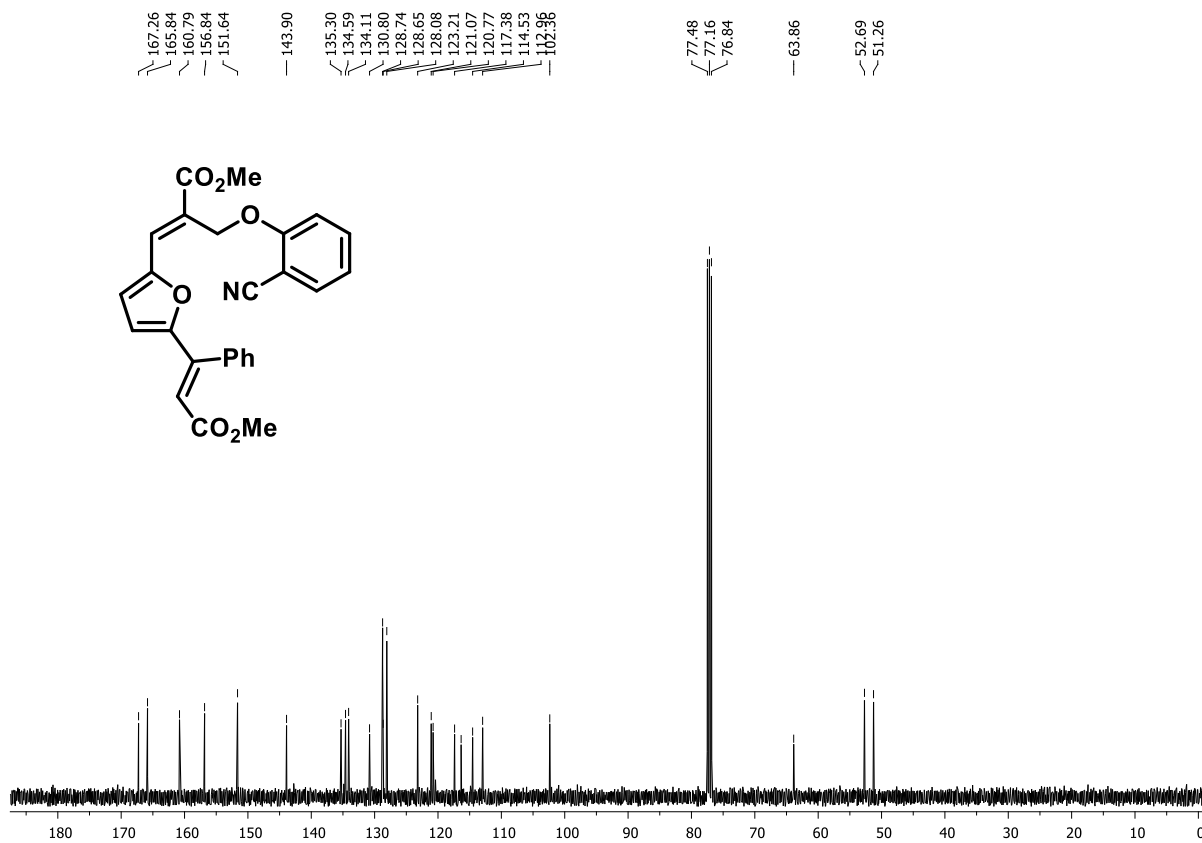

**Ethyl (Z)-3-(5-((E)-2-((2-cyanophenoxy) methyl)-3-methoxy-3-oxoprop-1-en-1-yl)furan-2-yl)-3-phenyl acrylate (8g)**

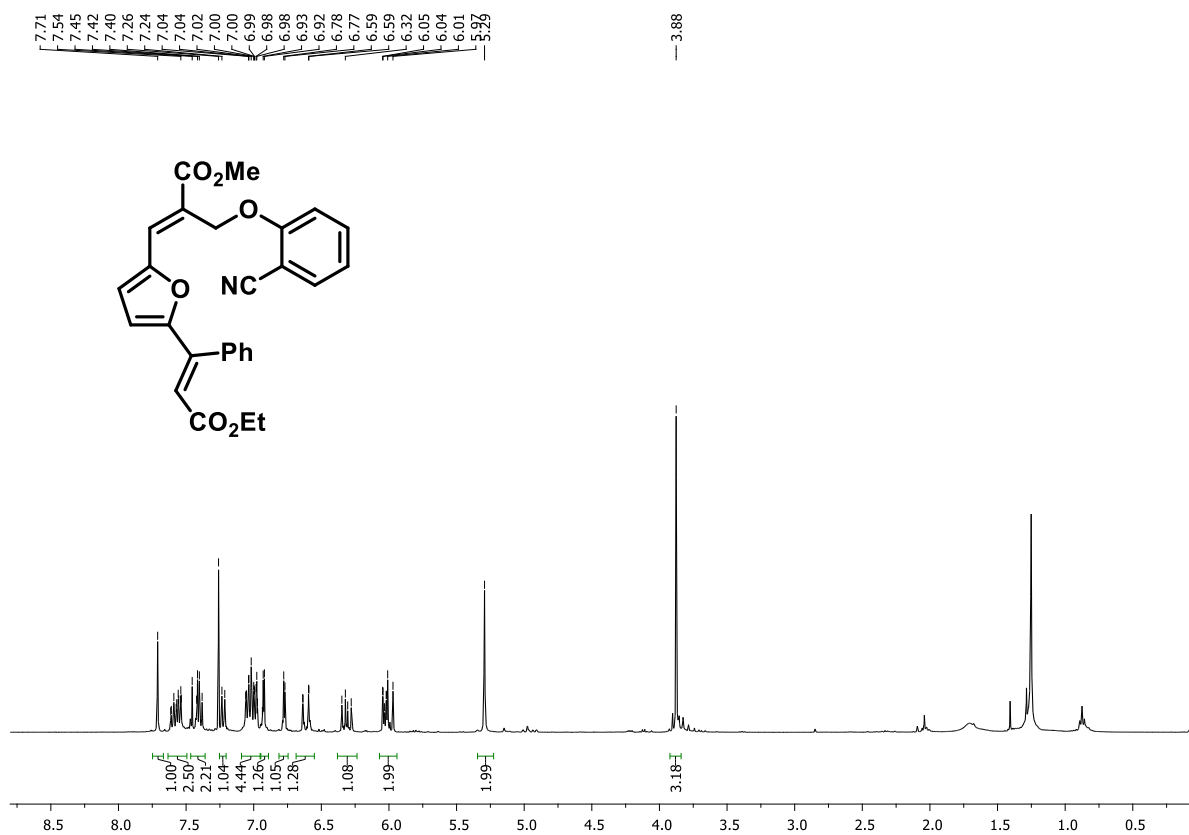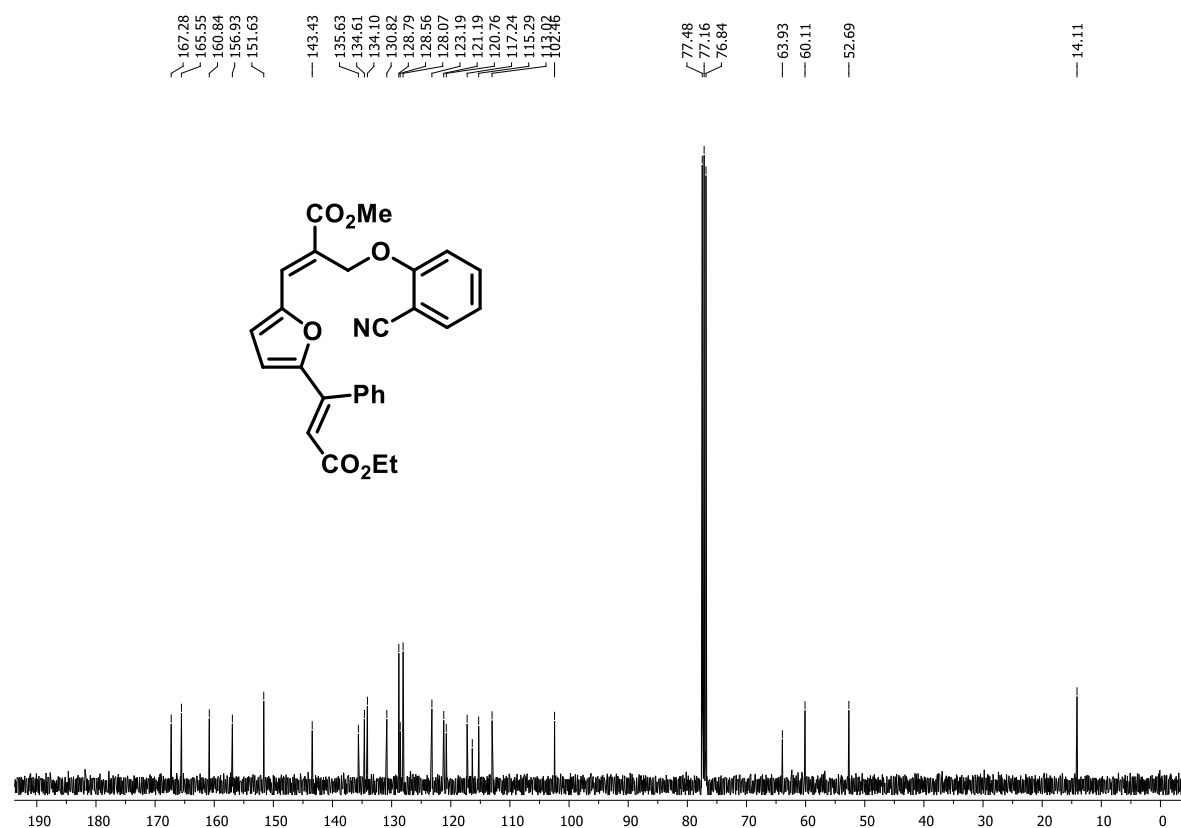

**Methyl (E)-3-(5-((E)-3-(3-(acryloyloxy) phenoxy)-3-oxoprop-1-en-1-yl) furan-2-yl)-2-((2-cyanophenoxy) methyl) acrylate (8h)**

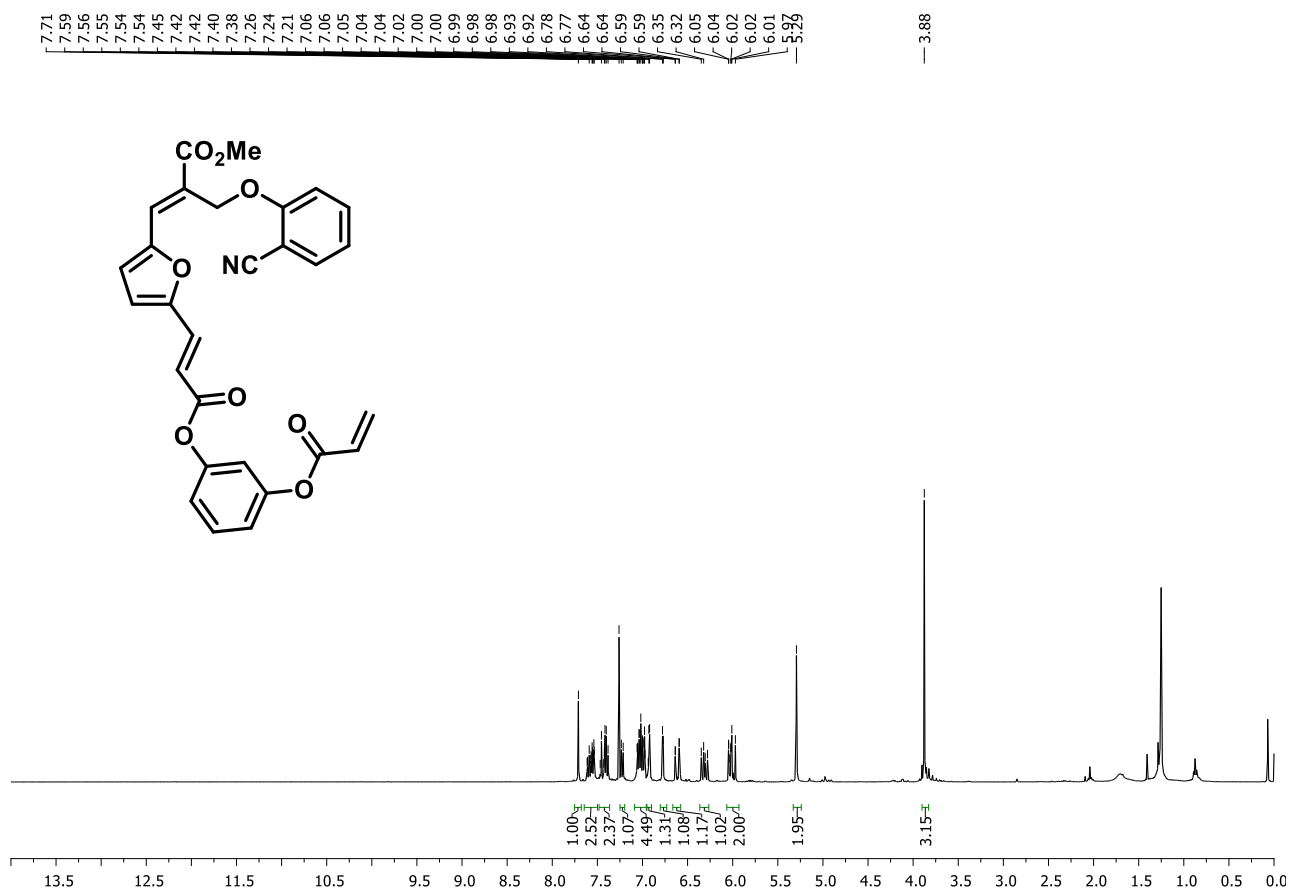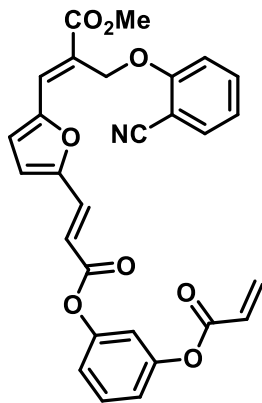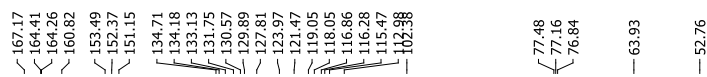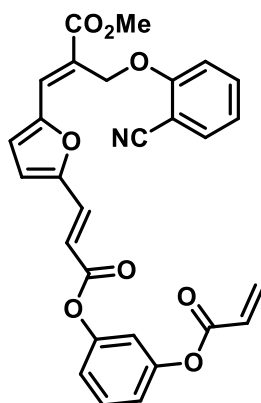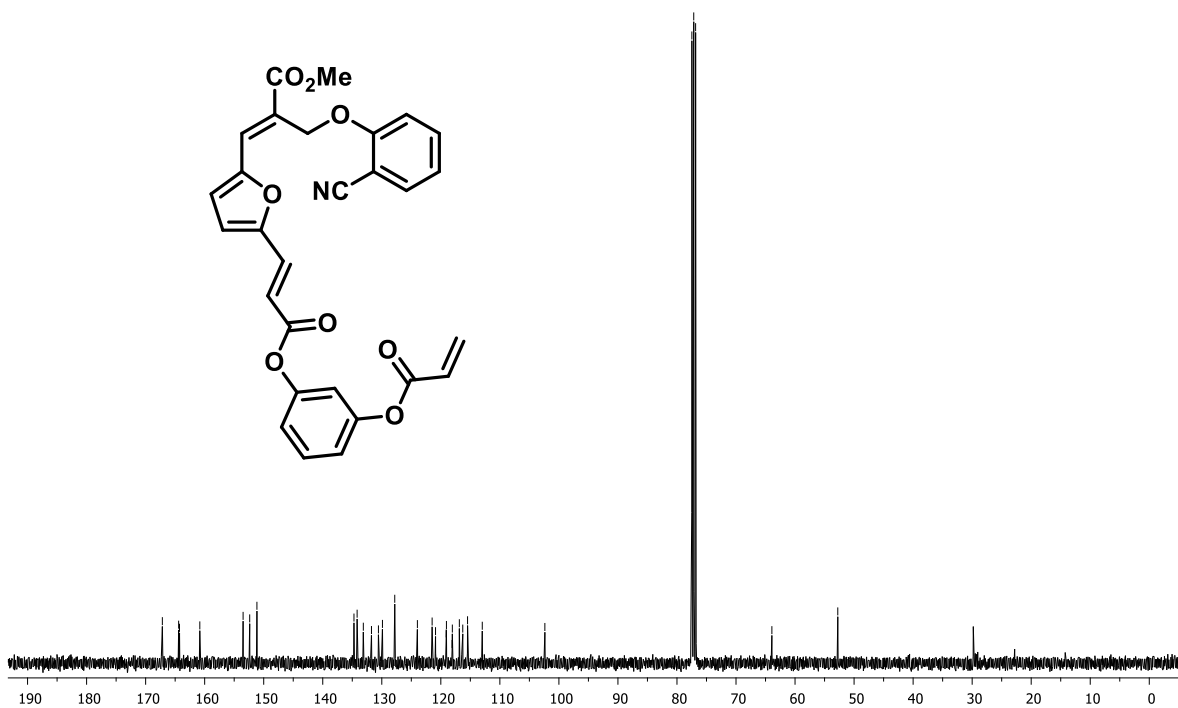

Methyl (*E*)-2-((2-cyanophenoxy)methyl)-3-(5-((*E*)-3-methoxy-3-oxoprop-1-en-1-yl)thiophen-2-yl)acrylate (**8i**)

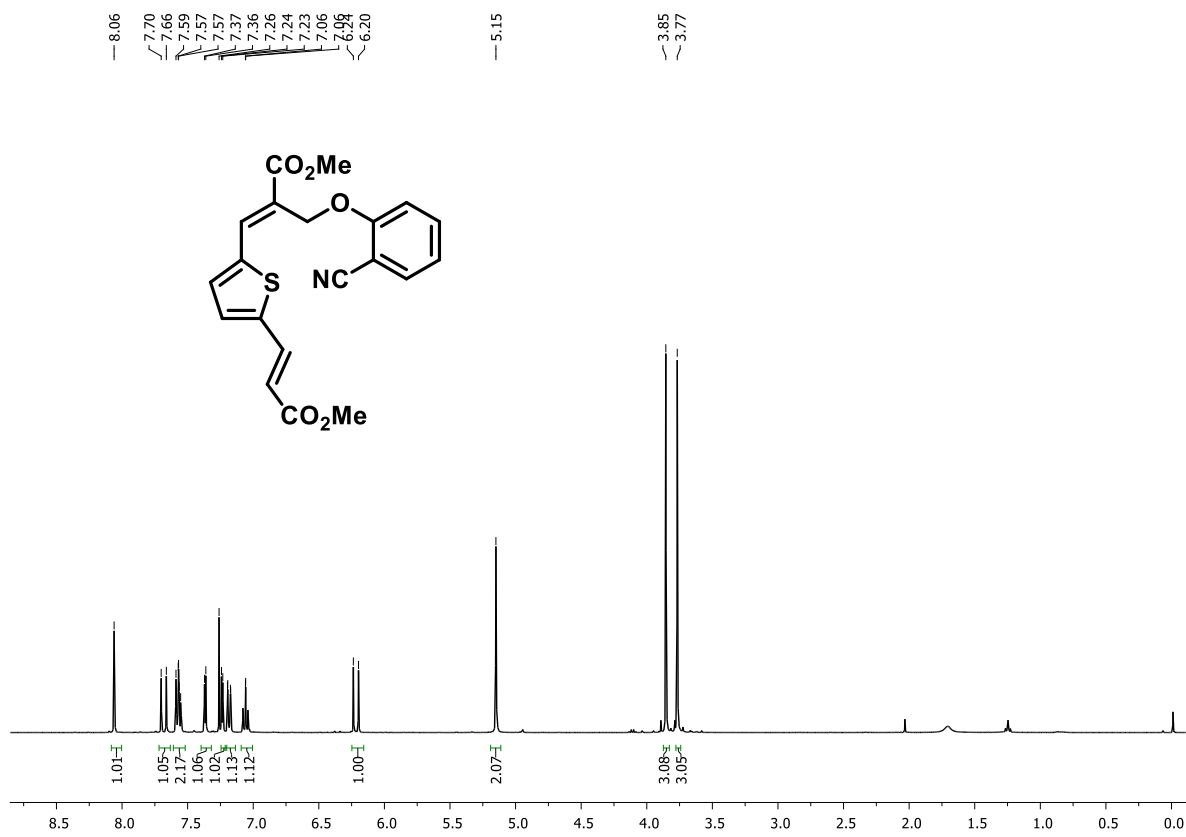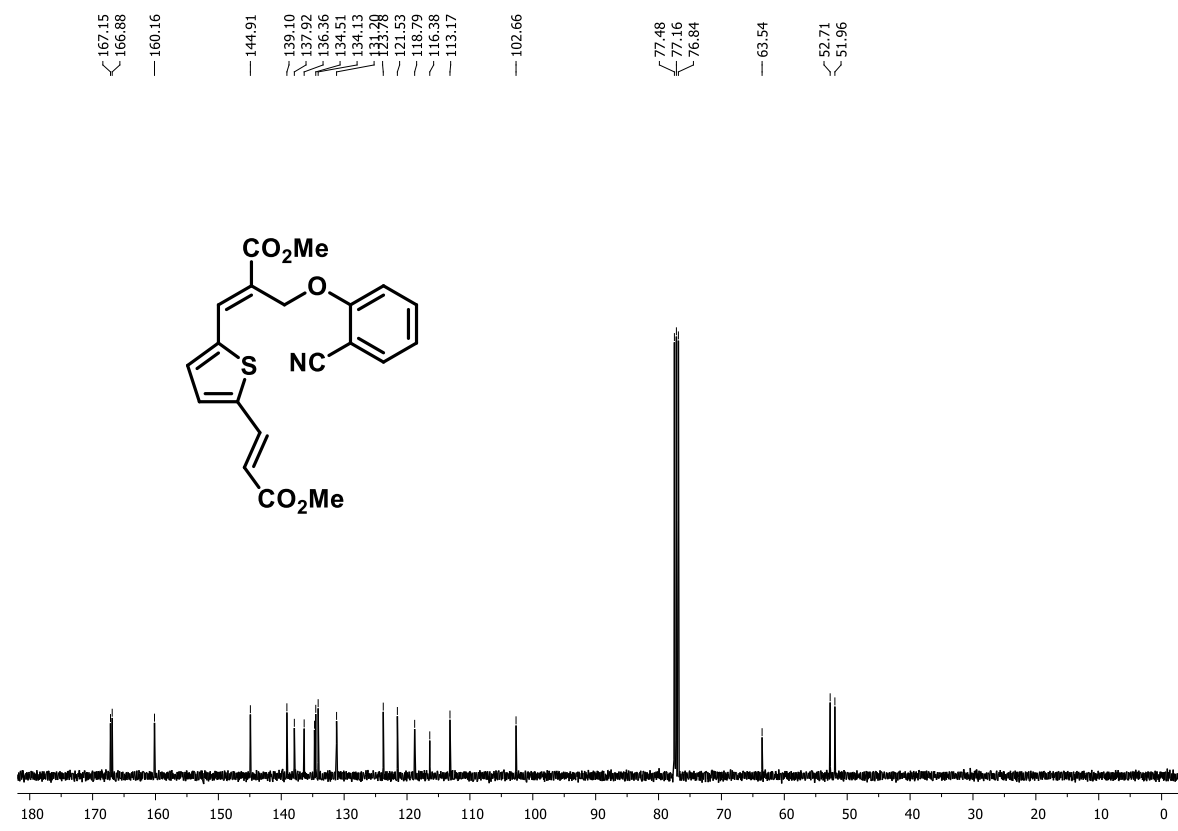



**Methyl (E)-2-((2-cyanophenoxy)methyl)-3-(5-((E)-3-ethoxy-3-oxoprop-1-en-1-yl)thiophen-2-yl)acrylate (8j)**

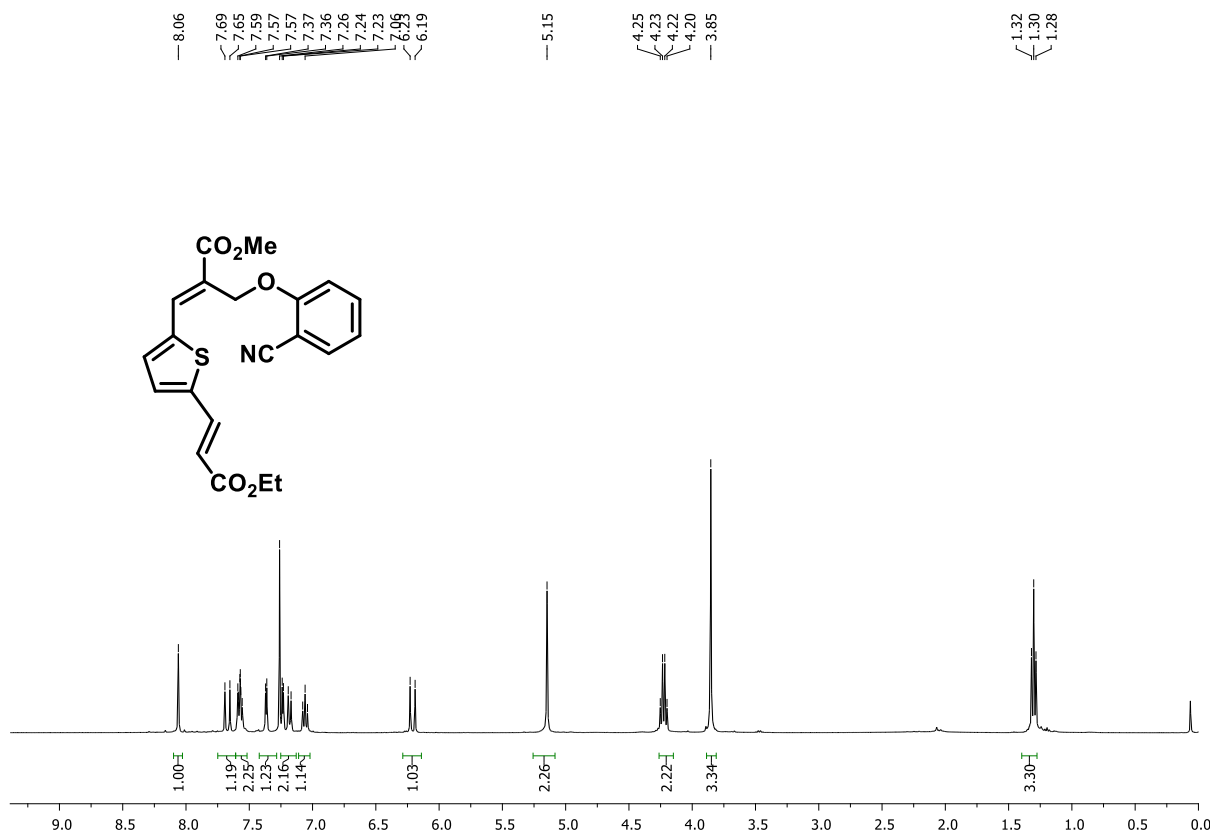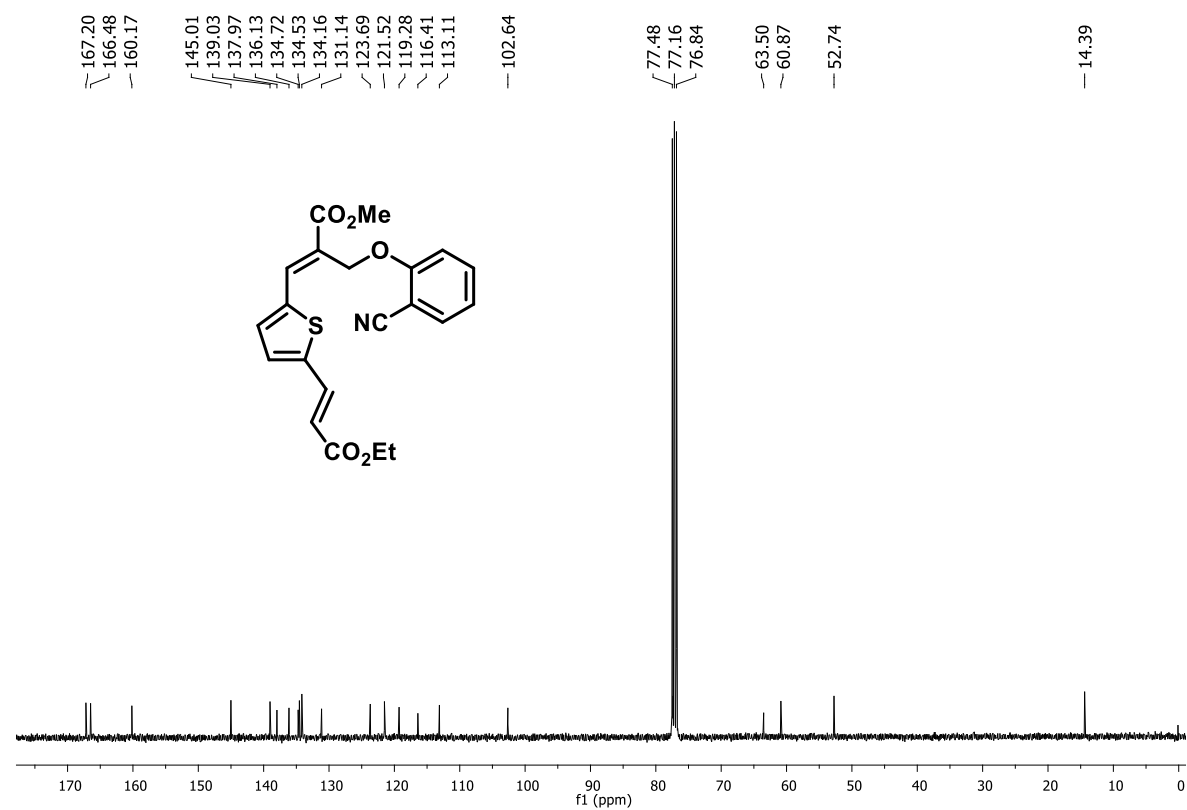

Methyl (*E*)-2-((2-cyanophenoxy)methyl)-3-(5-((*E*)-3-oxo-3-(((1*R*,2*R*,4*R*)-1,7,7-trimethylbicyclo[2.2.1]heptan-2-yl)oxy)prop-1-en-1-yl)thiophen-2-yl)acrylate (8k)

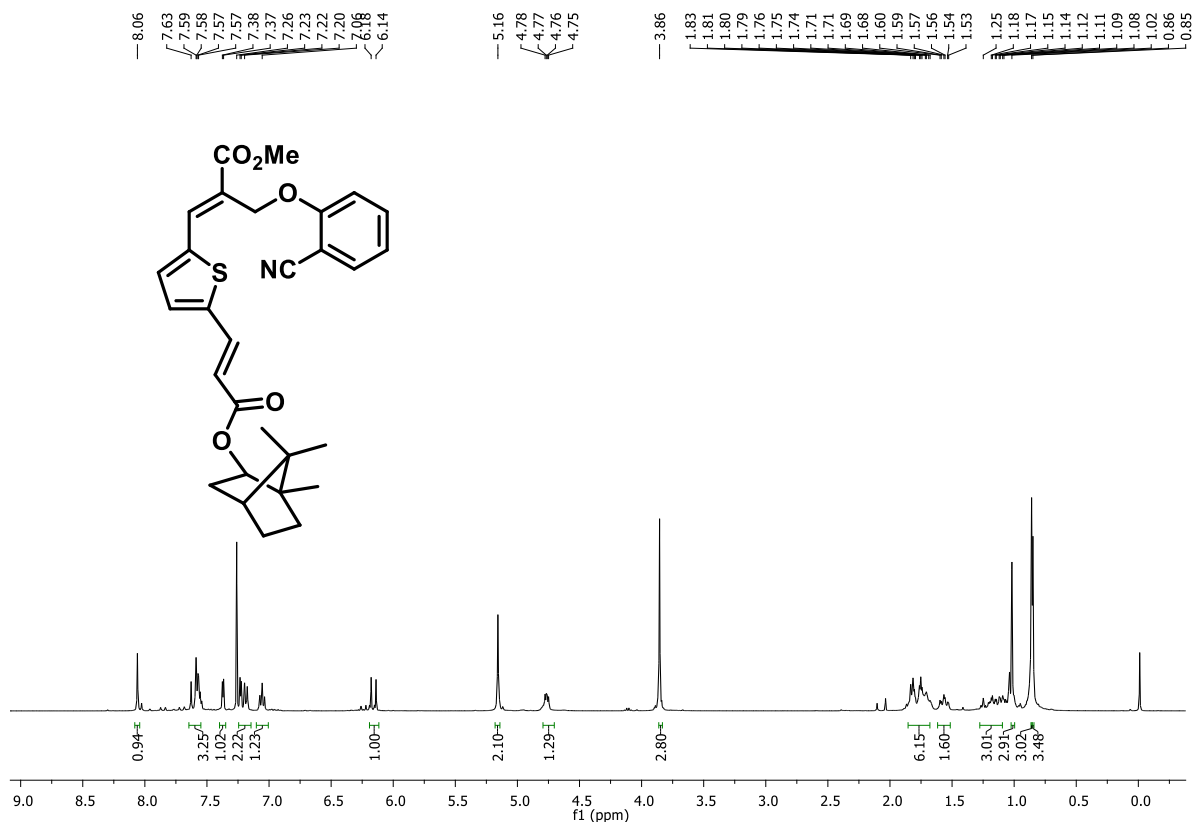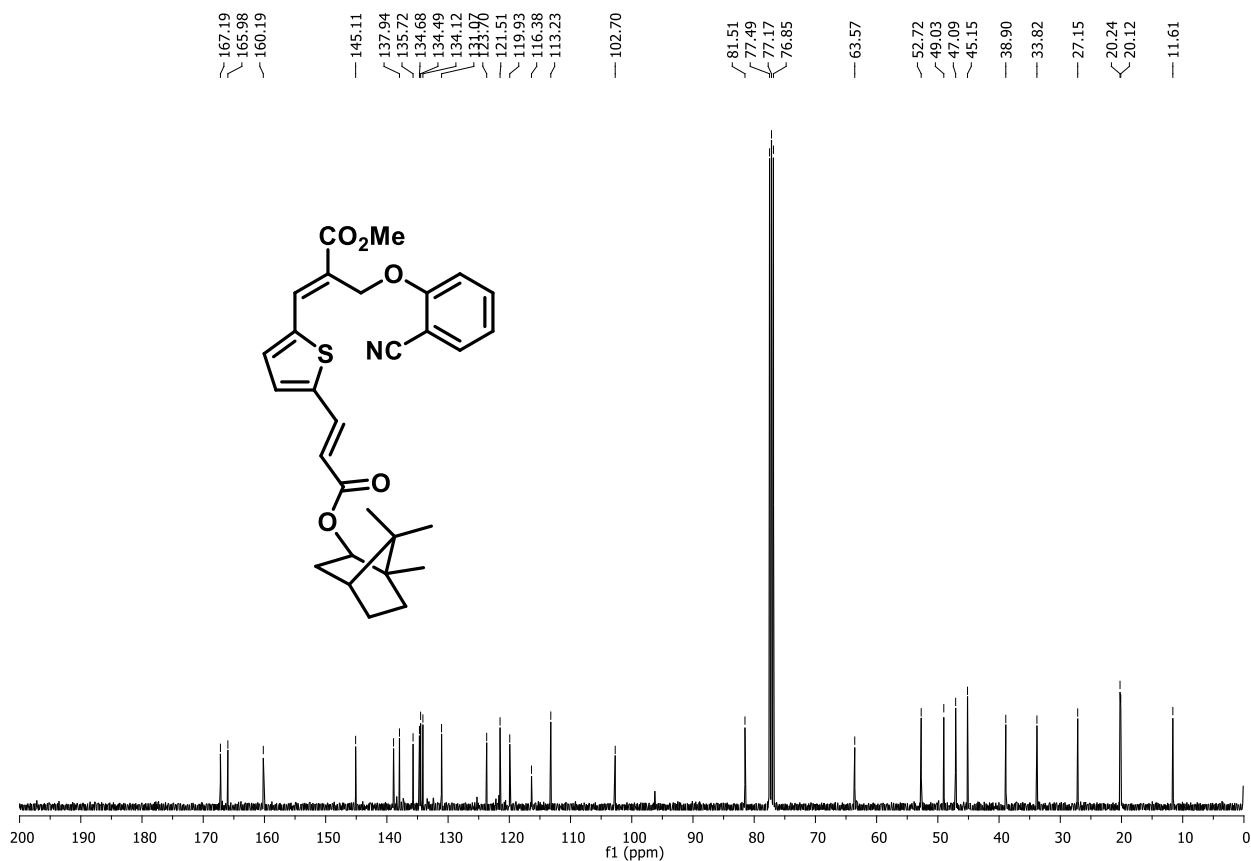

**Methyl 2-(((E)-3-(3-((E)-2-((2-cyanophenoxy)methyl)-3-methoxy-3-oxoprop-1-en-1-yl)phenyl) acryloyl)oxy)benzoate (3s)**

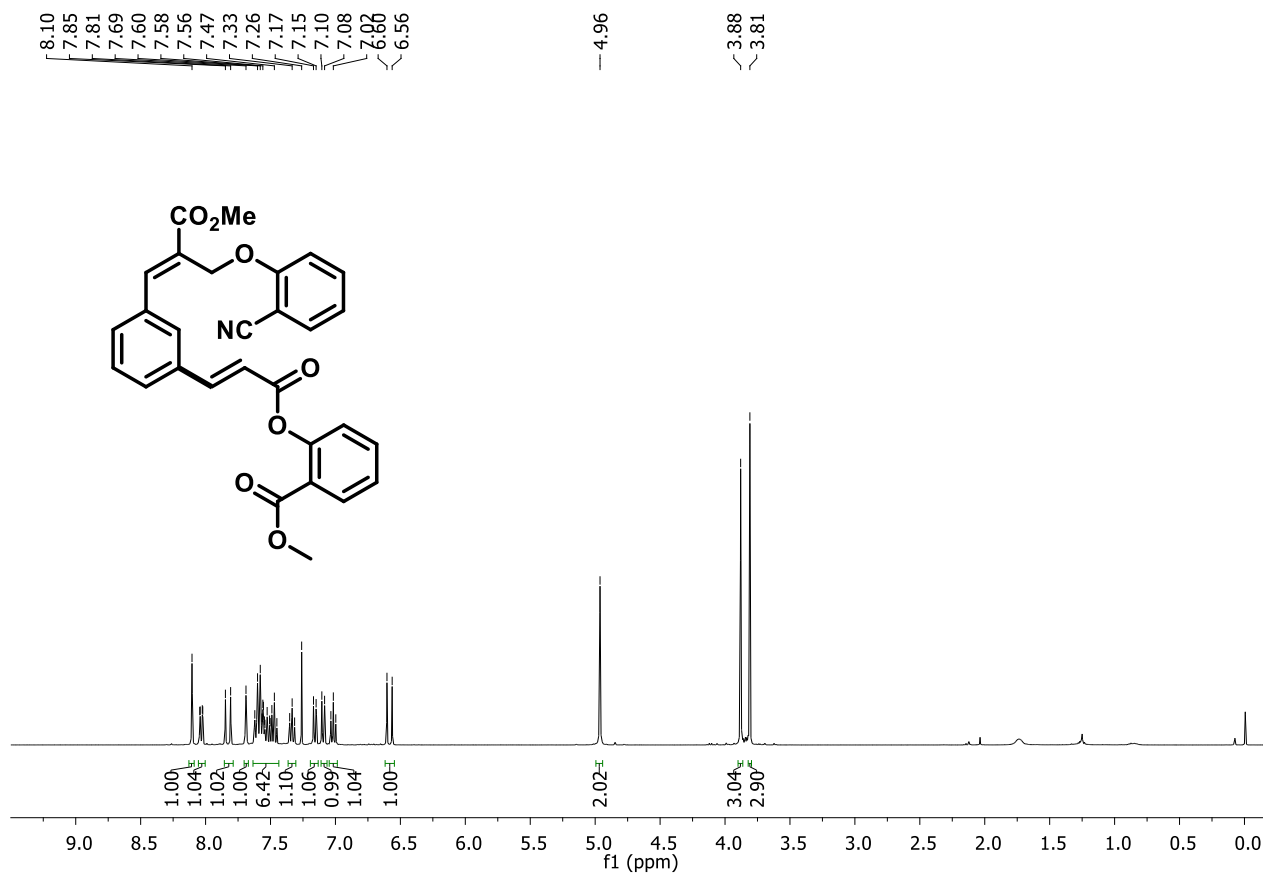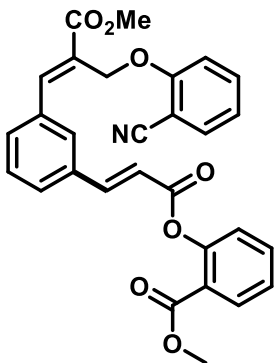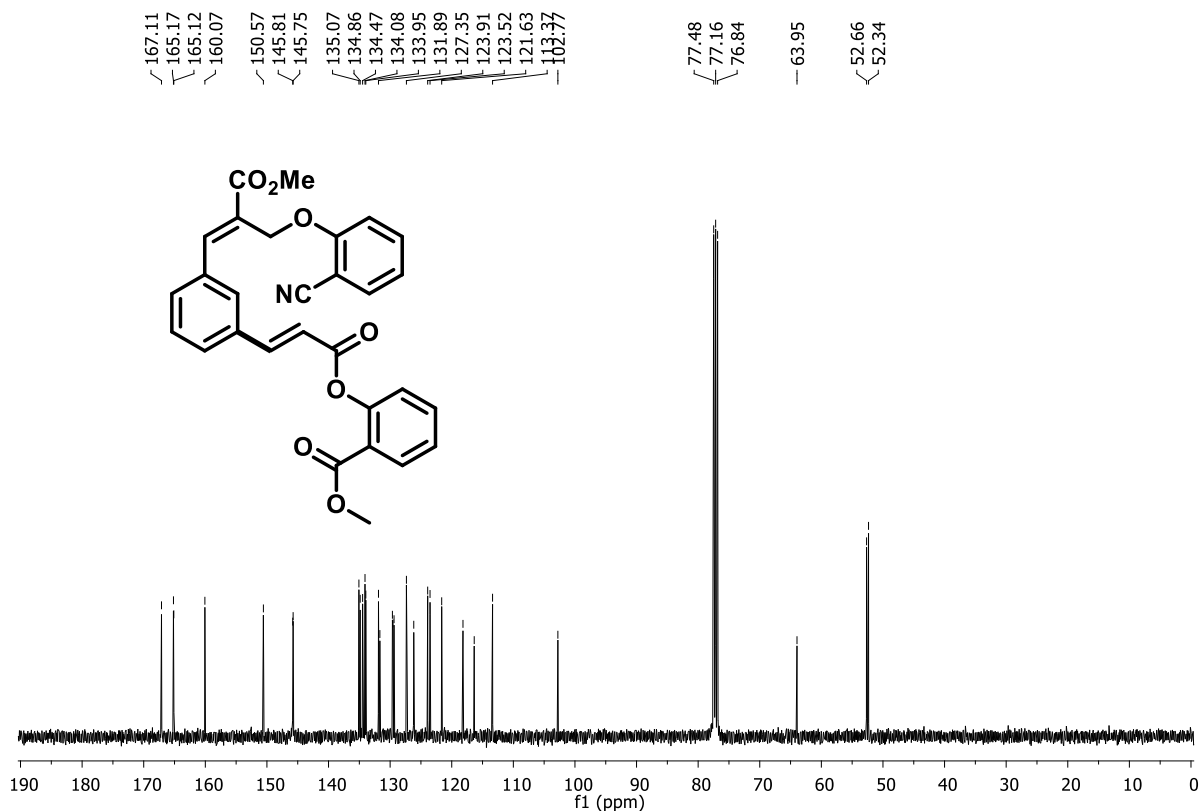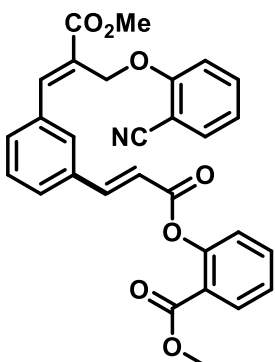

Methyl (E)-3-(3-((E)-3-(2-cinnamoylphenoxy)-3-oxoprop-1-en-1-yl)phenyl)-2-((2-cyanophenoxy)methyl)acrylate (3t)

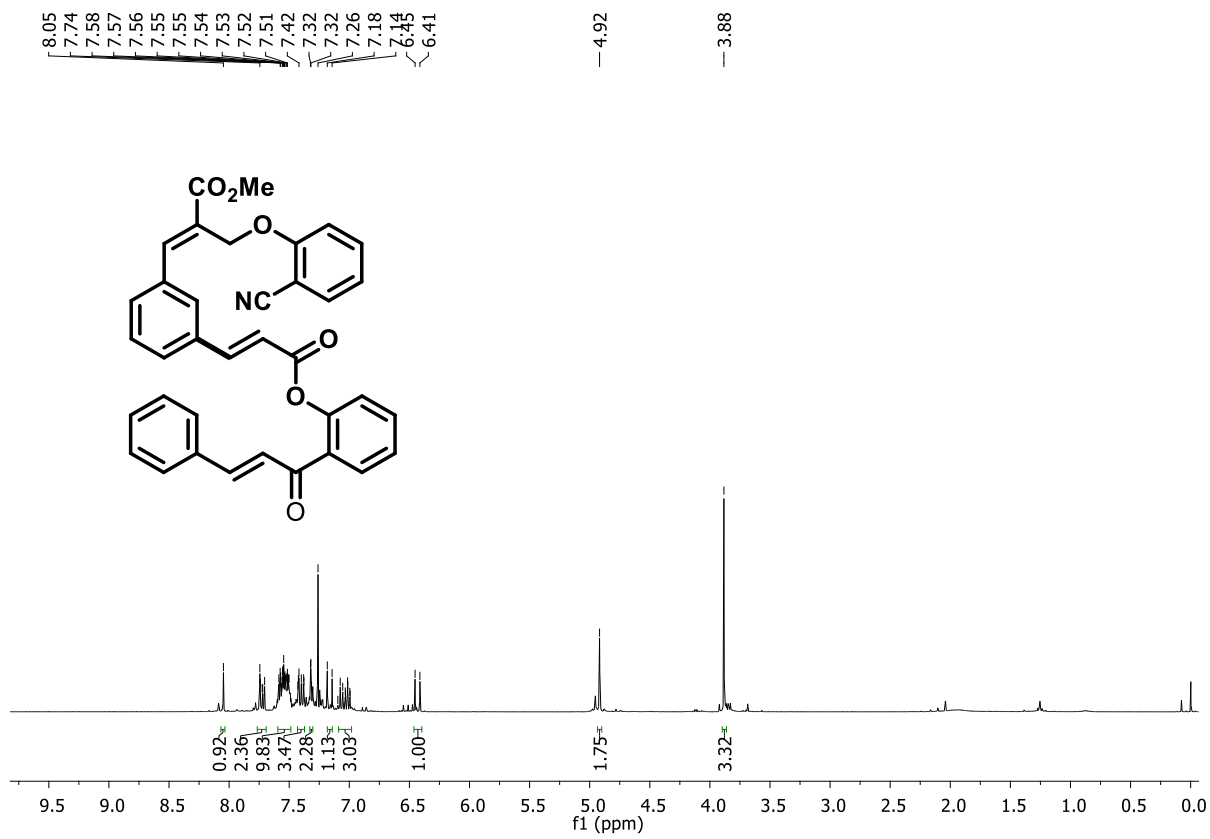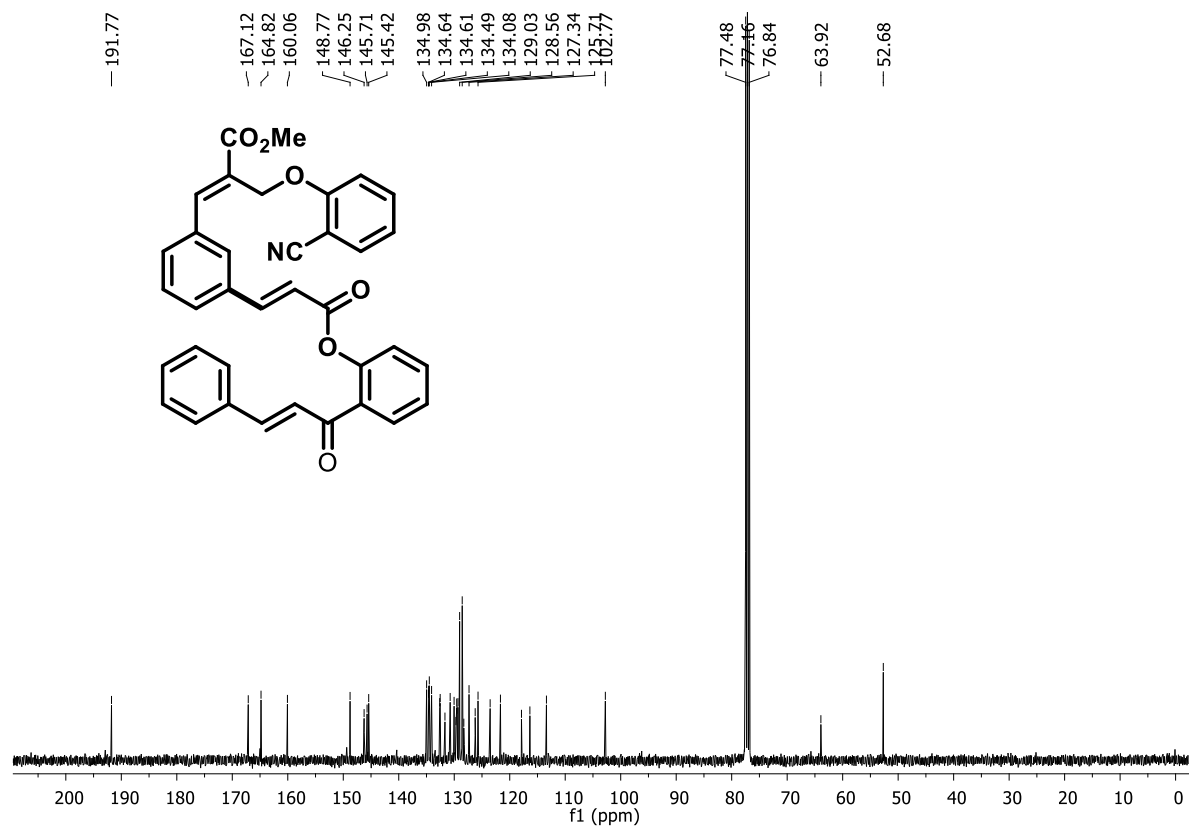

Methyl (*E*)-3-(3-((*E*)-3-(4-acetamidophenoxy)-3-oxoprop-1-en-1-yl)phenyl)-2-((2-cyanophenoxy)methyl)acrylate (3u)

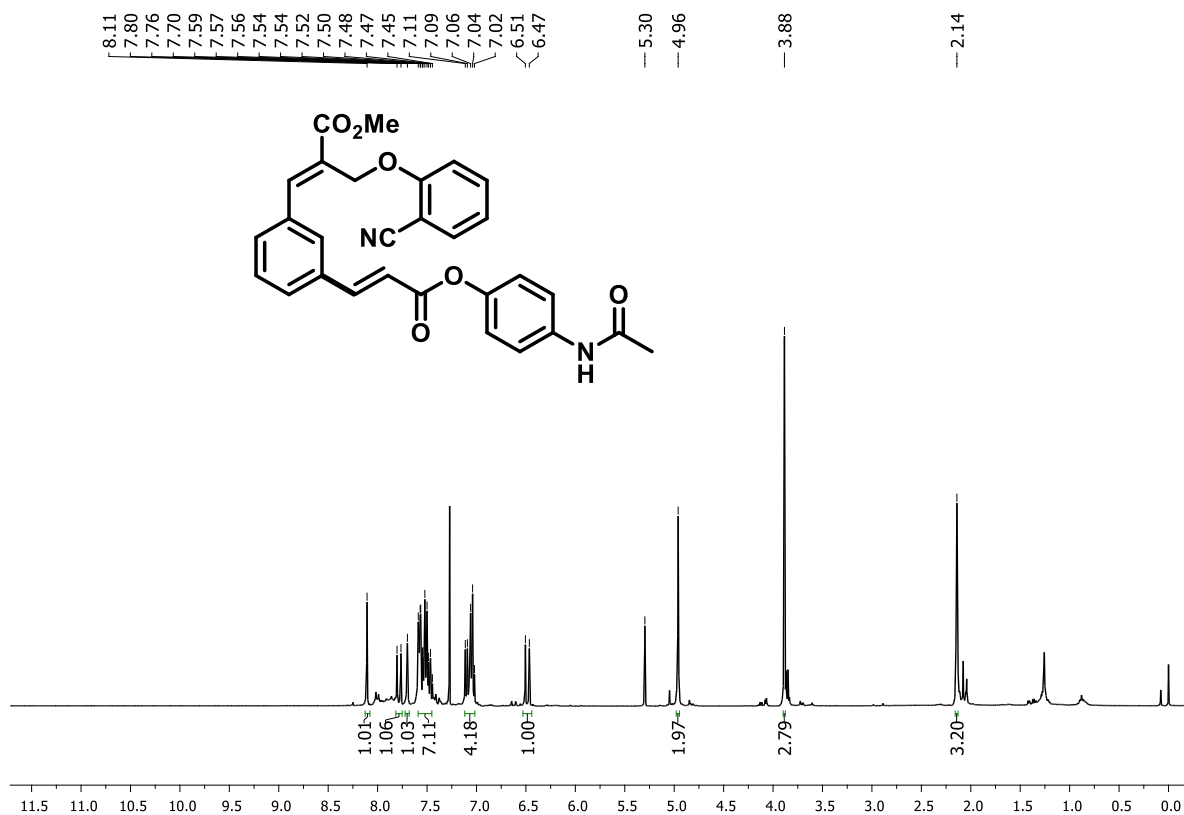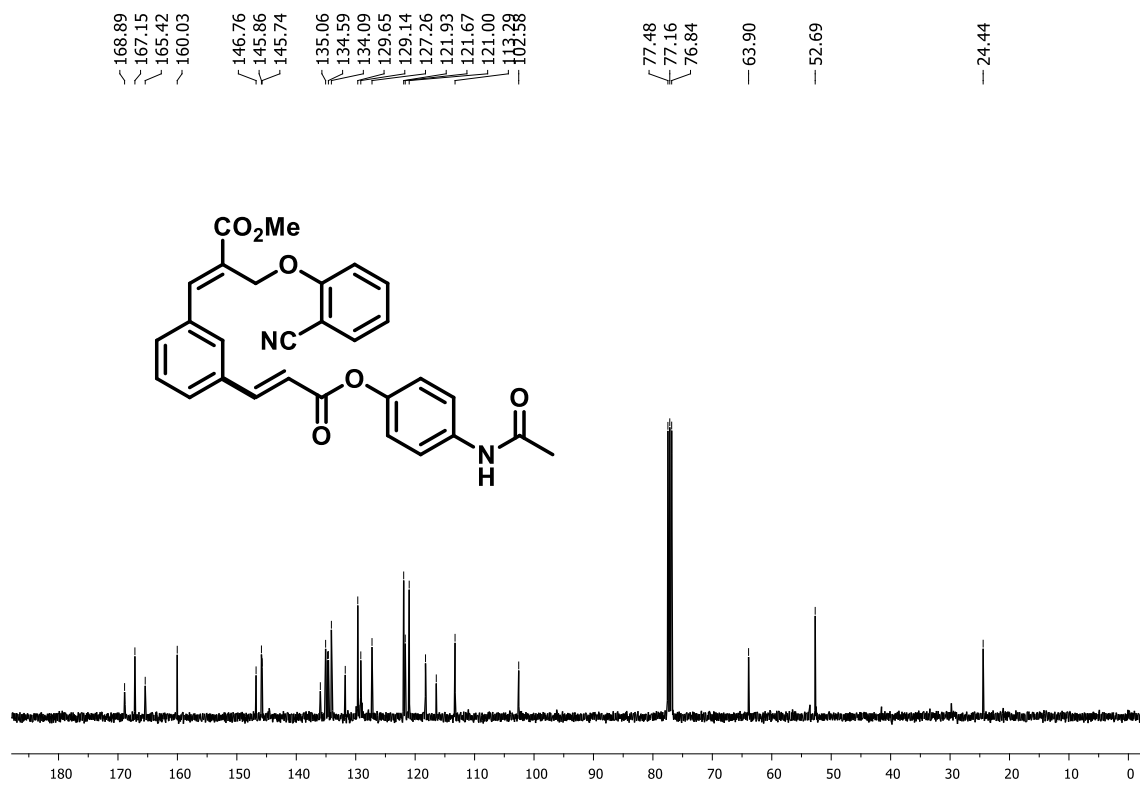

Methyl *(E)*-2-((2-cyanophenoxy)methyl)-3-(3-((*E*)-3-(((8*R*,9*S*,13*S*,14*S*)-13-methyl-17-oxo-7,8,9,11,12,13,14,15,16,17-decahydro-6*H*-cyclopenta[*a*]phenanthren-3-yl)oxy)-3-oxoprop-1-en-1-yl)phenyl)acrylate (**3v**)

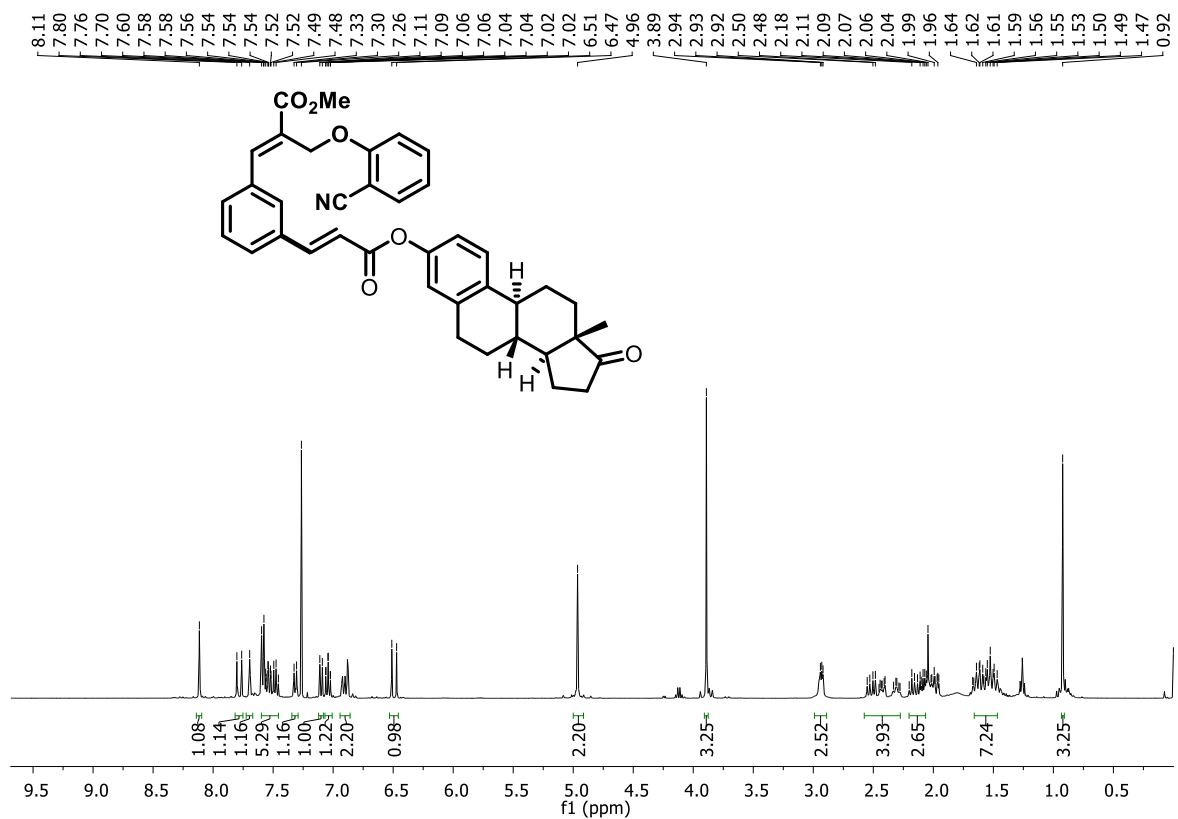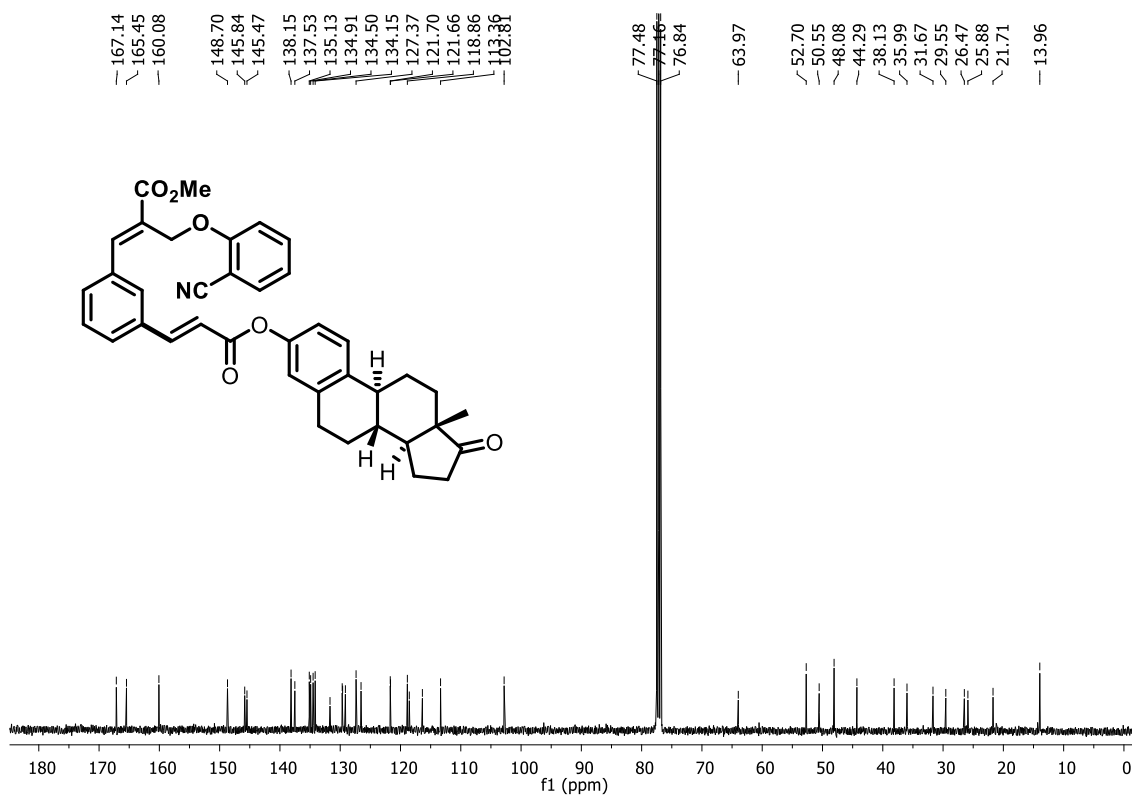

**Methyl (E)-2-((2-cyanophenoxy)methyl)-3-(3-((E)-3-(2-isopropyl-5-methylphenoxy)-3-oxoprop-1-en-1-yl)phenyl)acrylate (3w)**

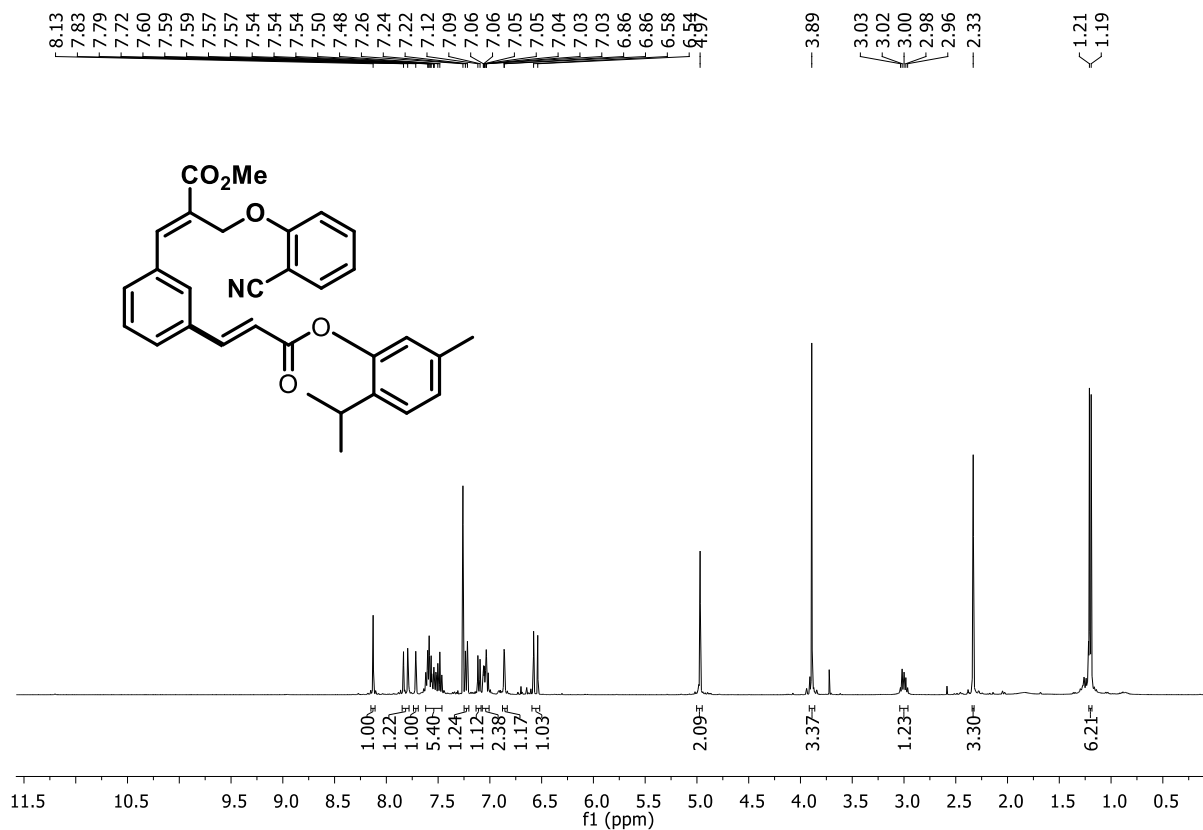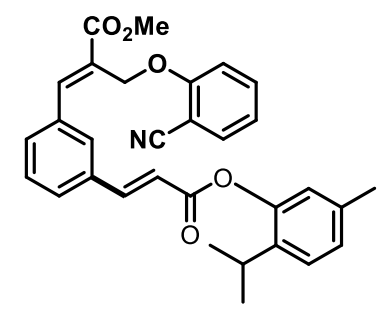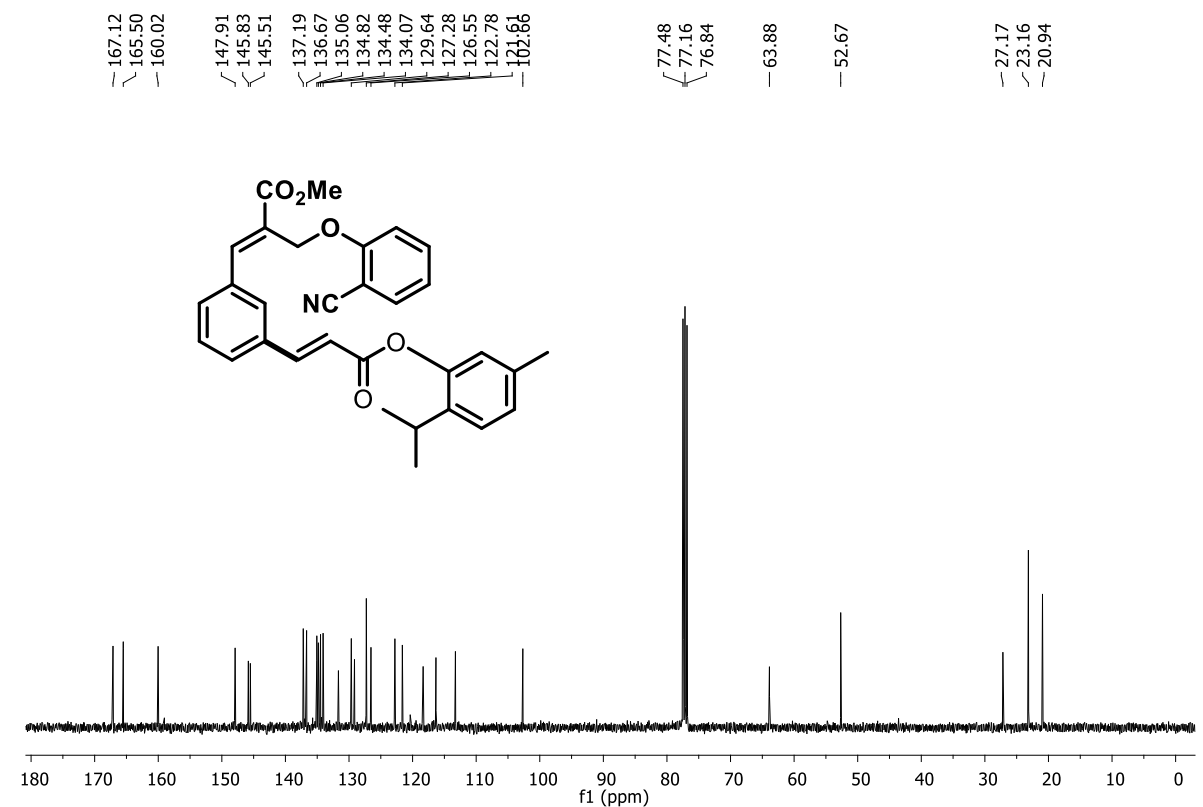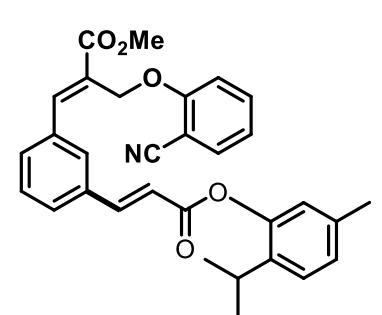

Methyl (E)-3-(3-((E)-3-(benzo[d][1,3]dioxol-5-yloxy)-3-oxoprop-1-en-1-yl)phenyl)-2-((2-cyanophenoxy)methyl)acrylate (3x)

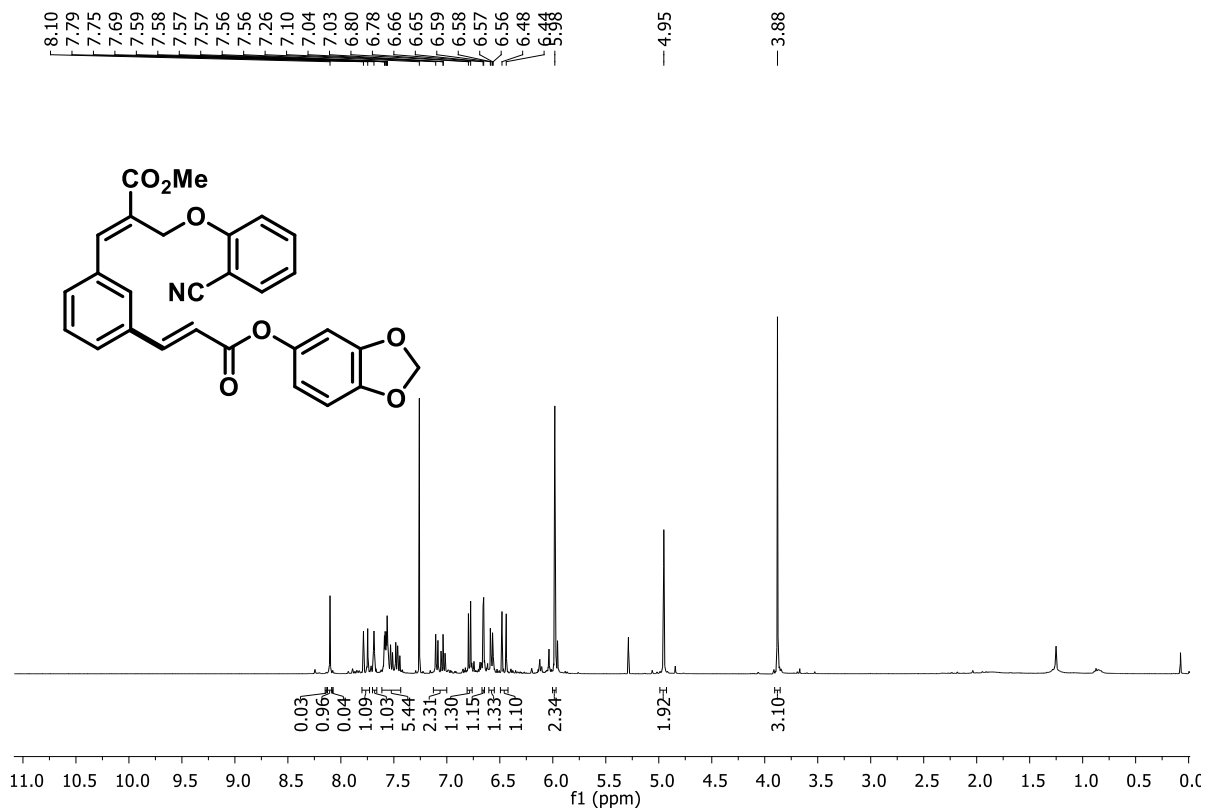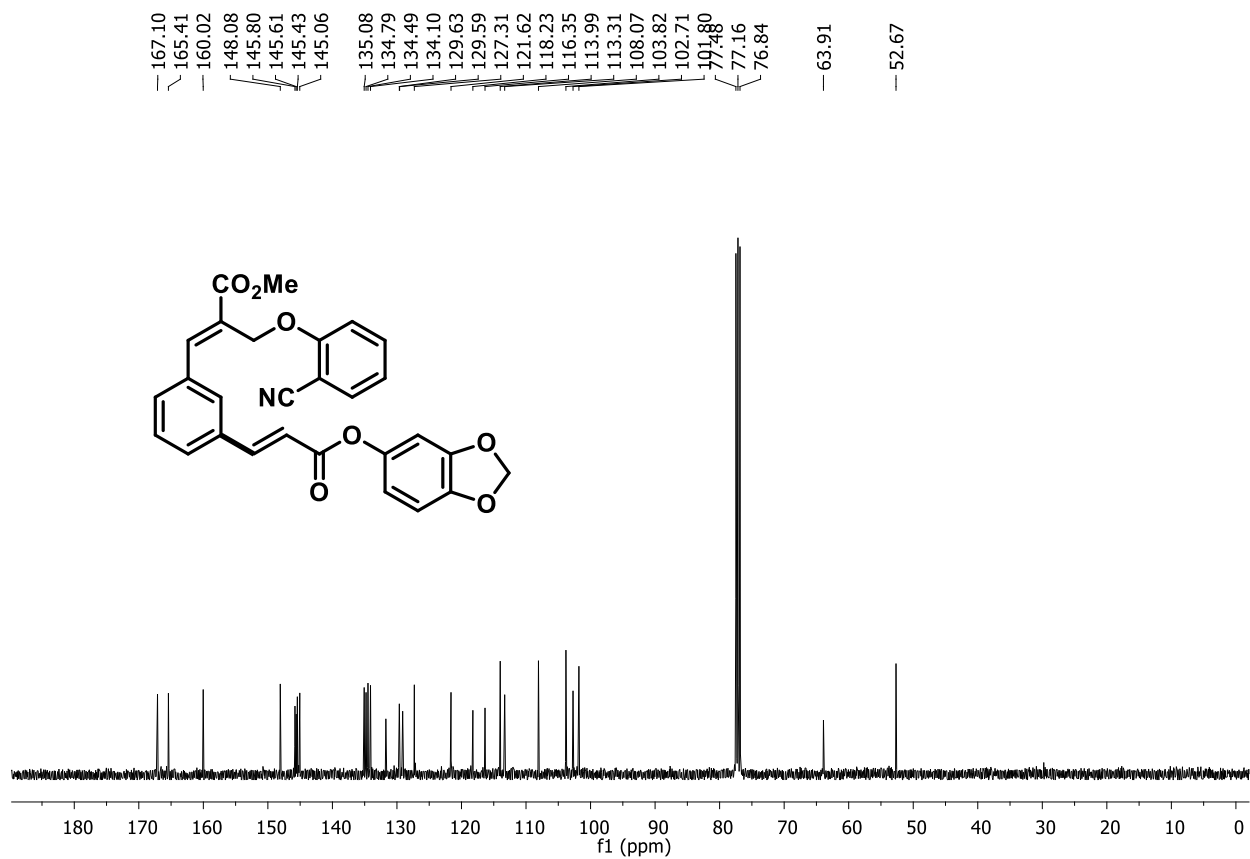



**Methyl (*E*)-2-((2-cyanophenoxy) methyl)-3-(3-(1,4-dioxo-1,4-dihydronaphthalen-2-yl)phenyl) acrylate**  
**(10a)**

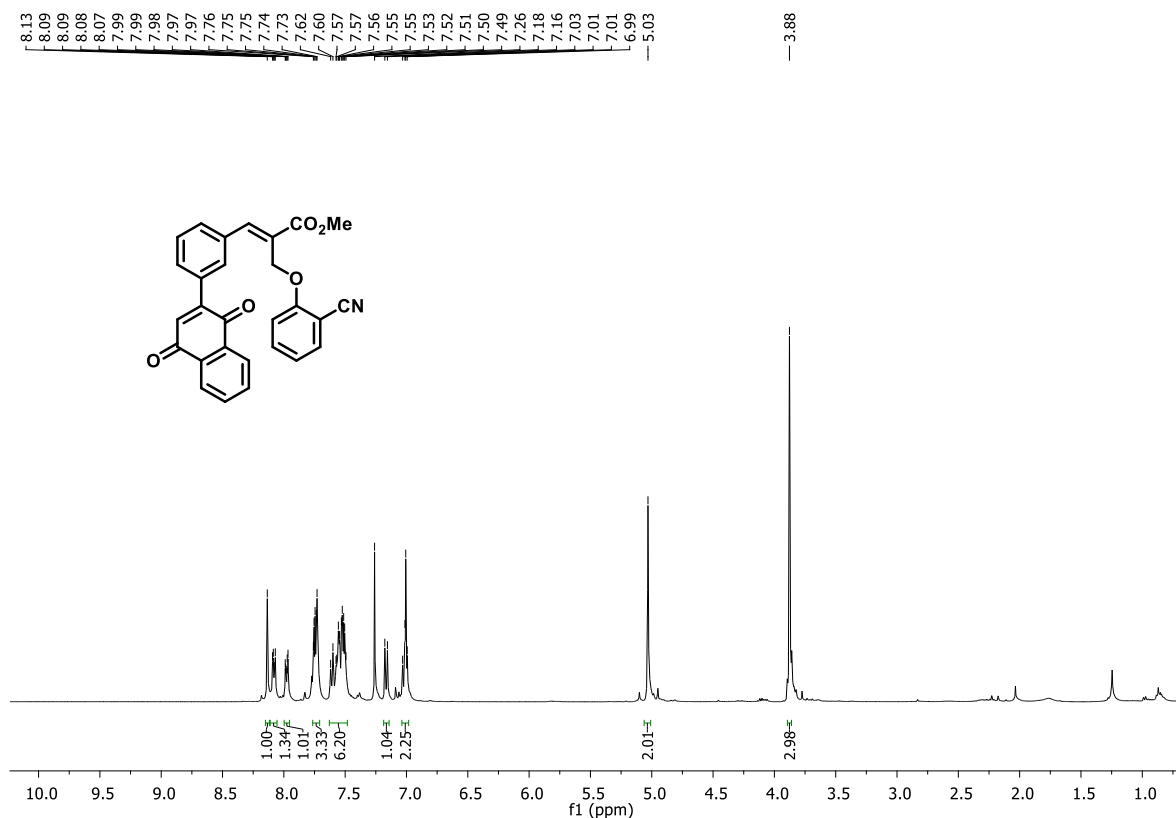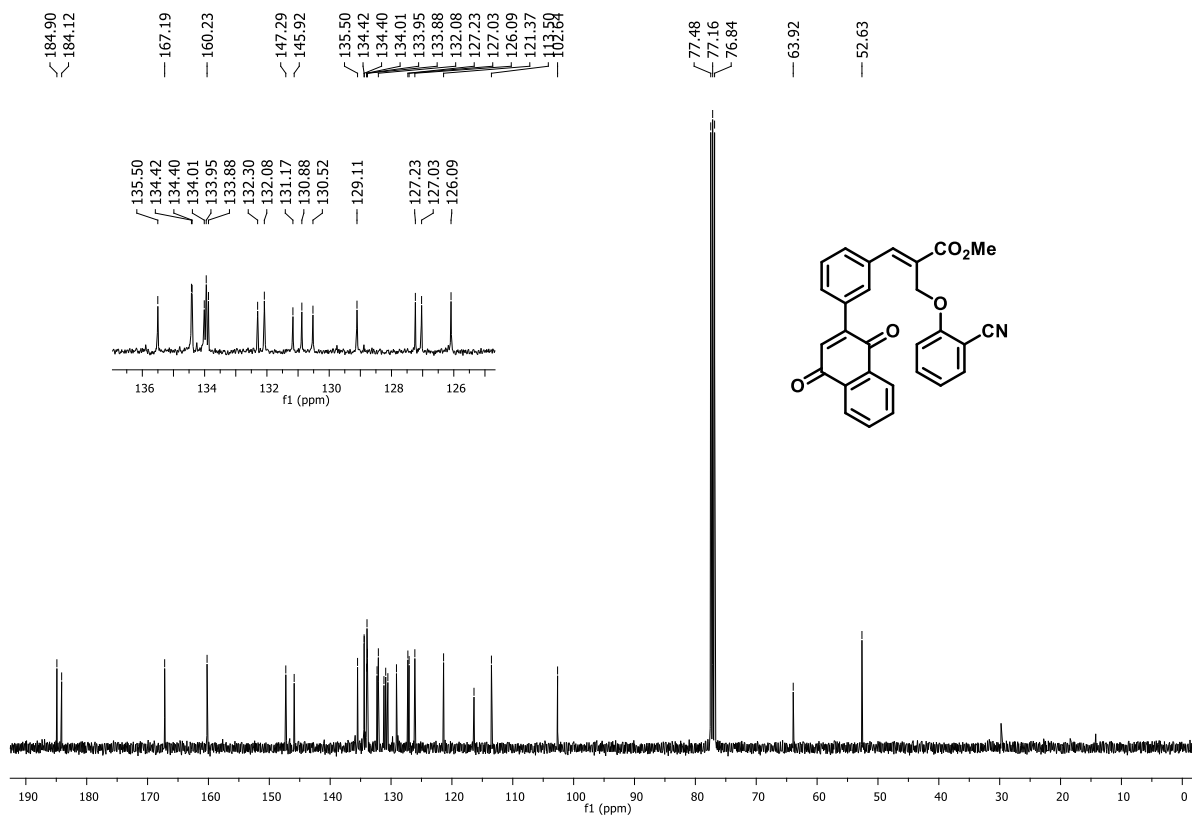

Methyl(*E*)-2-((2-cyanophenoxy)methyl)-3-(5-(1,4-dioxo-1,4-dihydronaphthalen-2-yl)-2-methylphenyl)acrylate (10b)

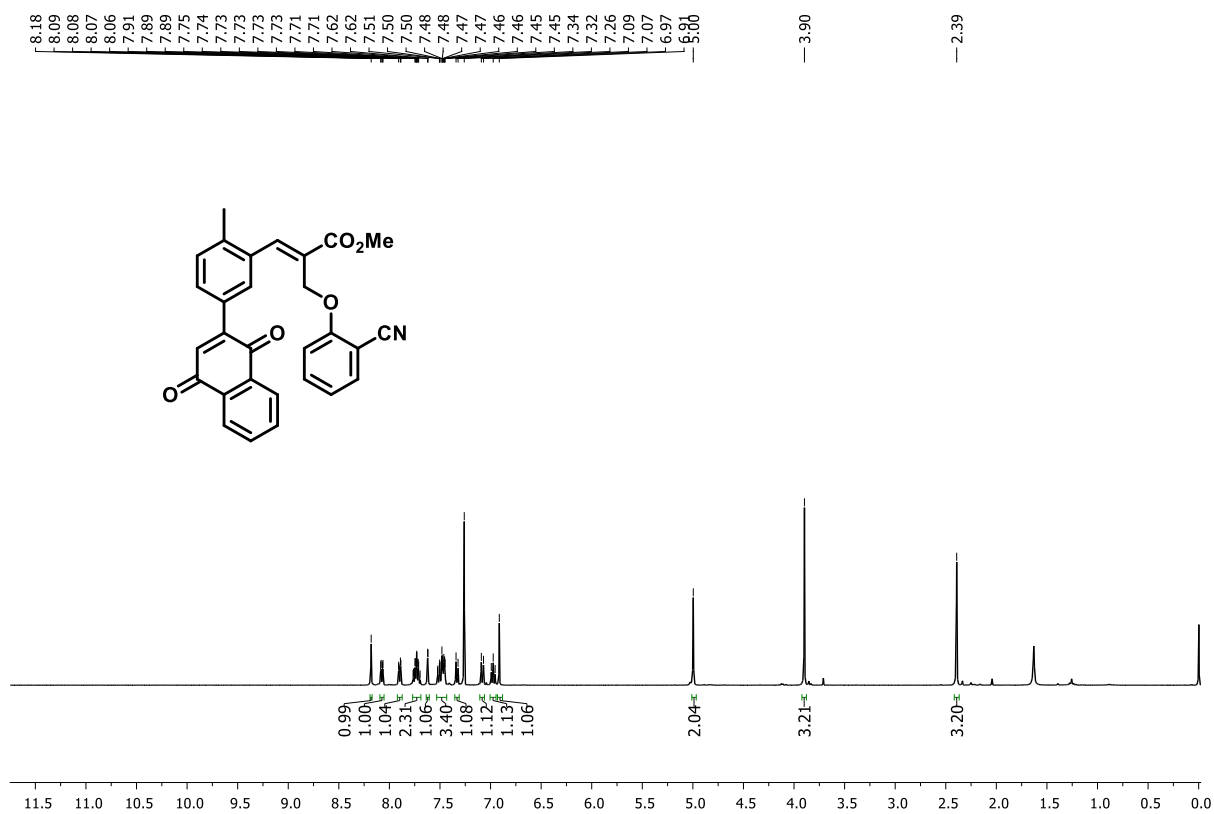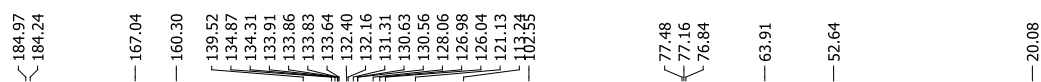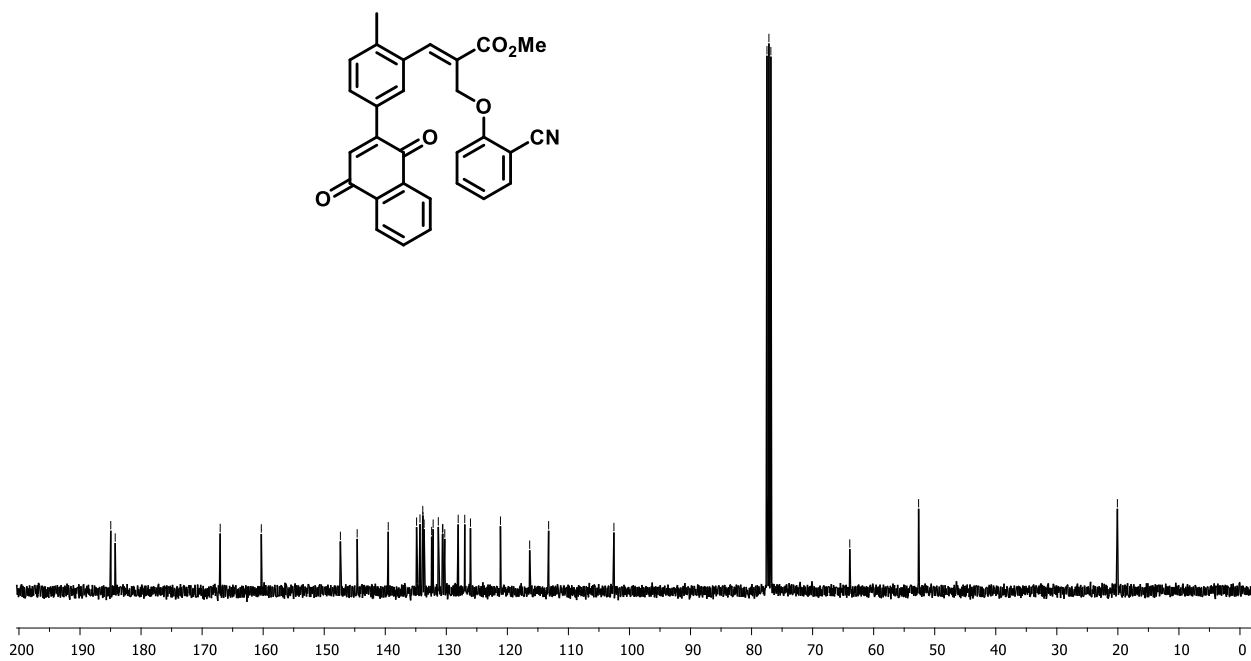

Methyl (E)-2-((2-cyanophenoxy)methyl)-3-(5-(1,4-dioxo-1,4-dihydronaphthalen-2-yl)-2-methoxyphenyl)acrylate (10c)

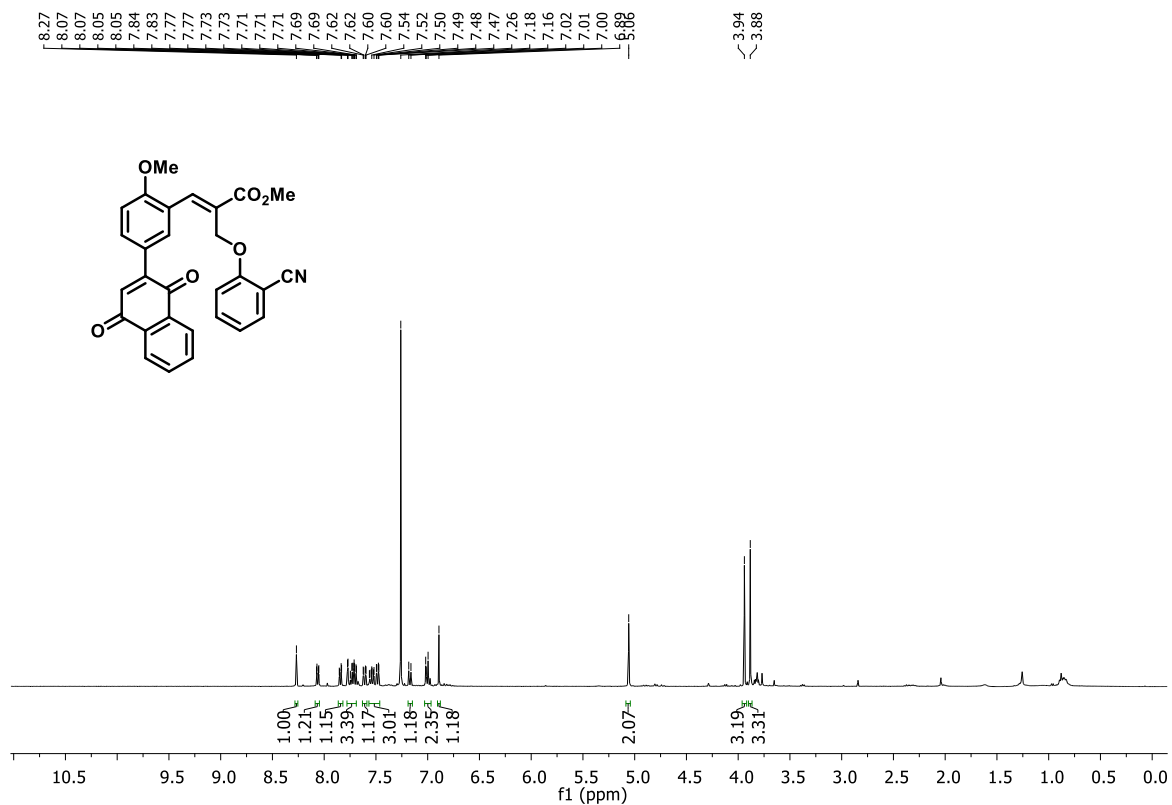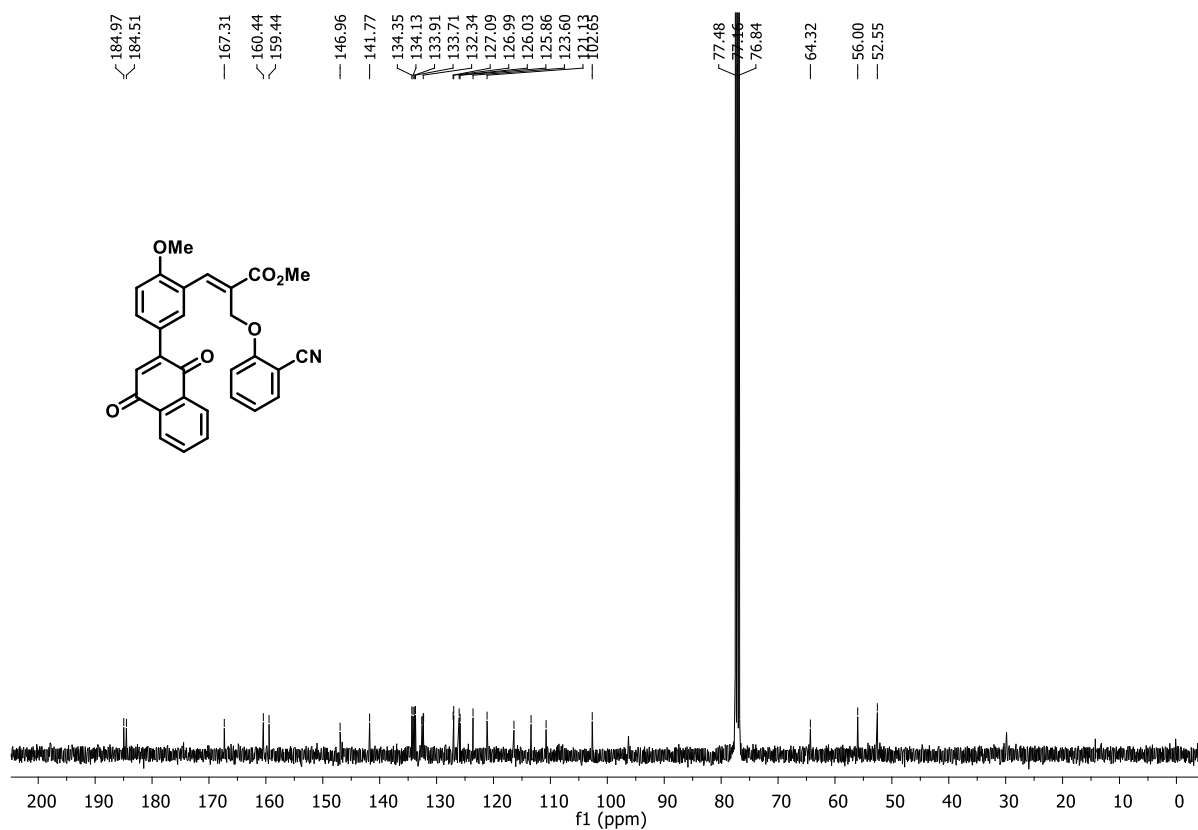

**Methyl (E)-2-((2-cyanophenoxy)methyl)-3-(5-(1,4-dioxo-1,4-dihydronaphthalen-2-yl)-2-fluorophenyl)acrylate (10d)**

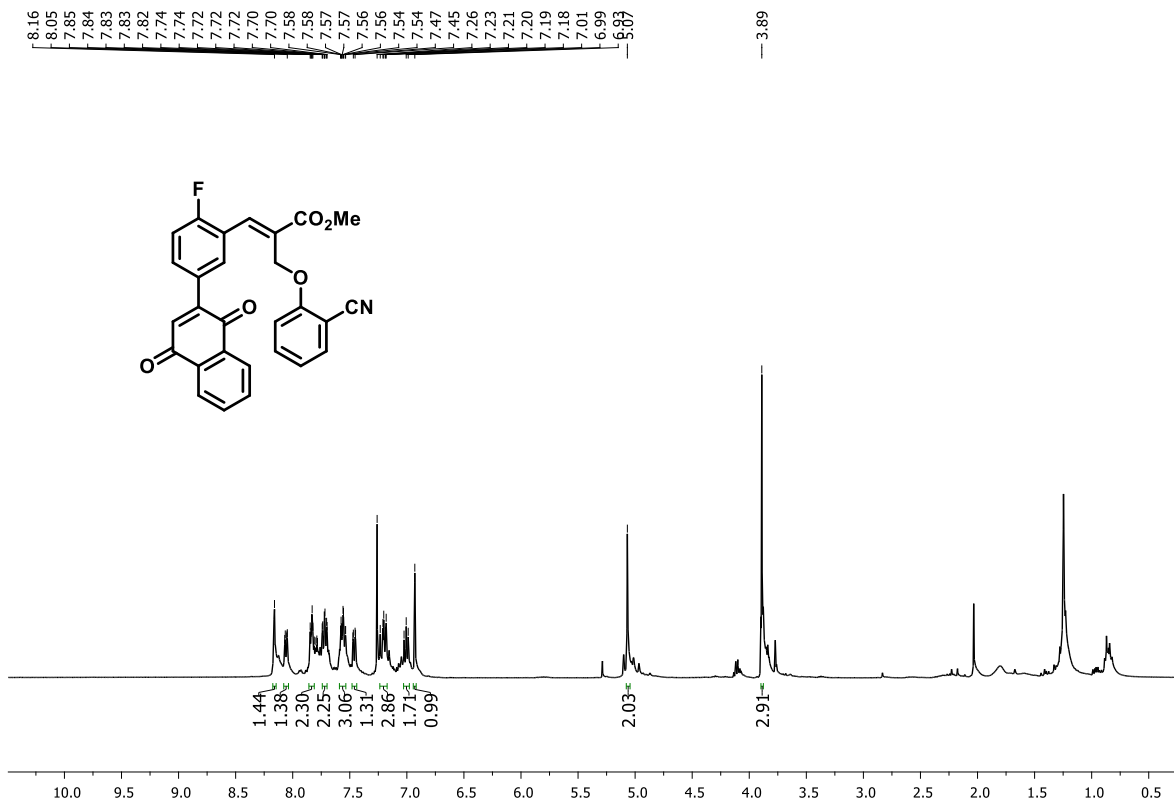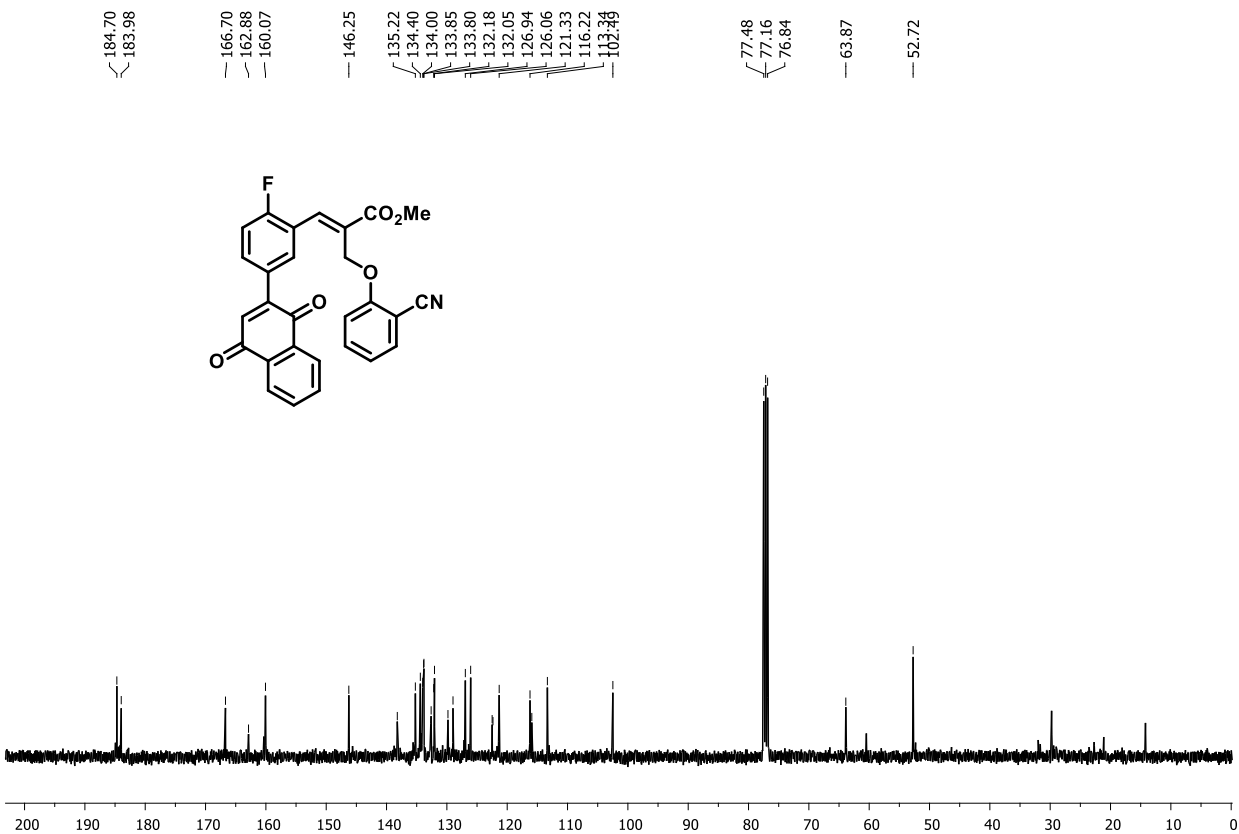

Methyl (E)-3-(2-chloro-5-(1,4-dioxo-1,4-dihydronaphthalen-2-yl)phenyl)-2-((2-cyanophenoxy)methyl)acrylate (10e)

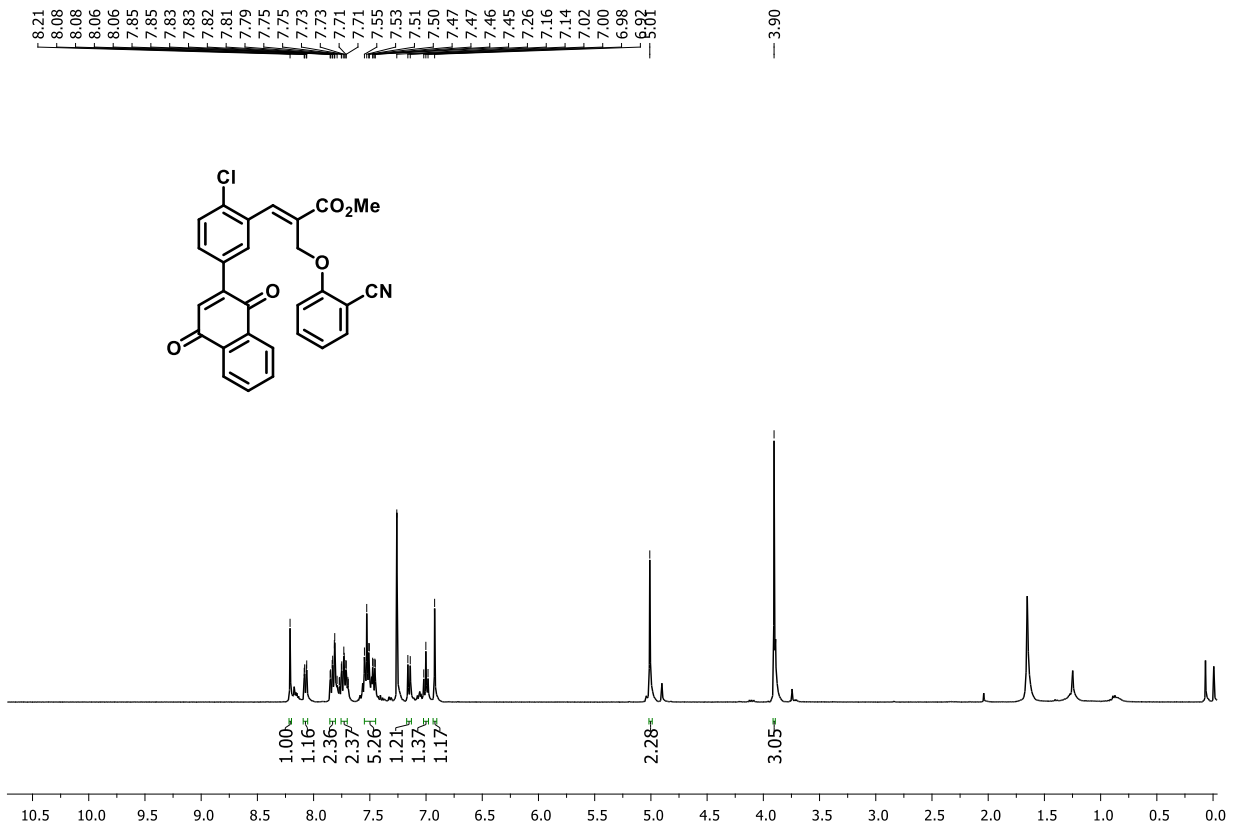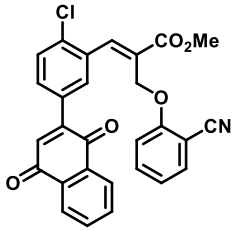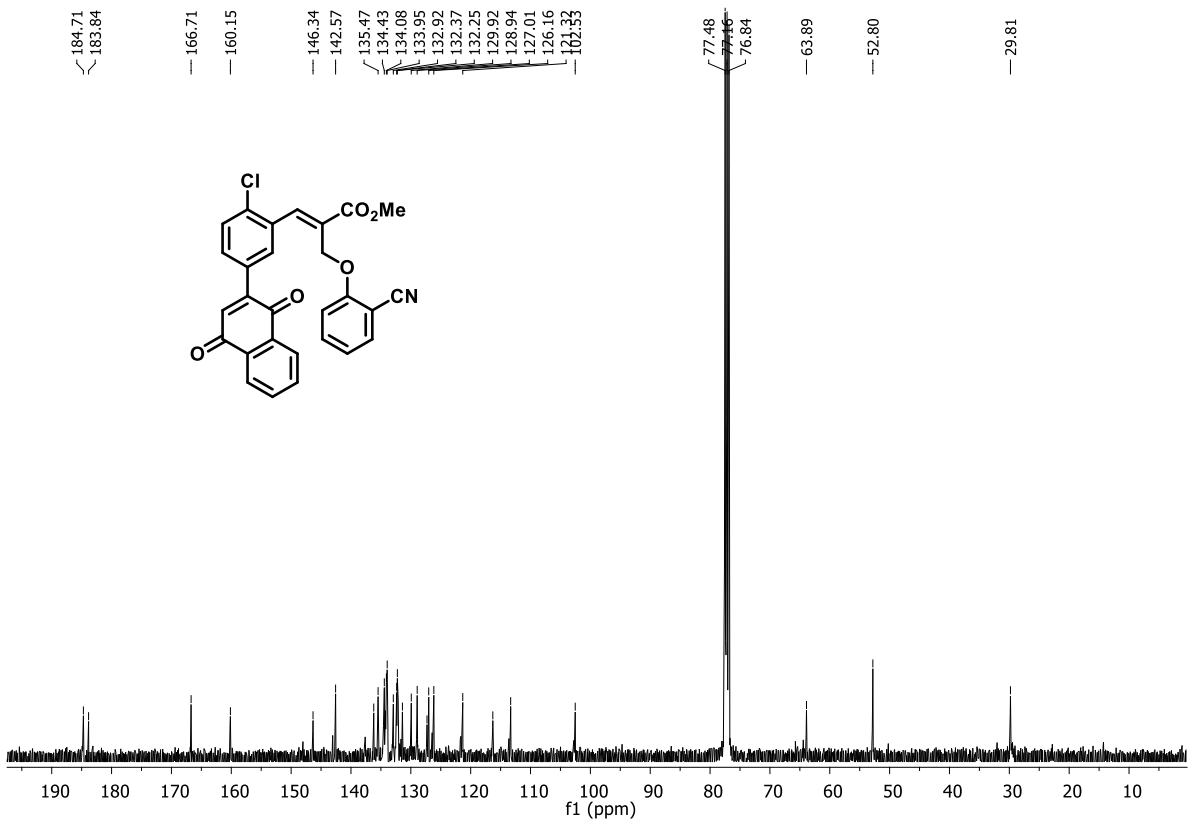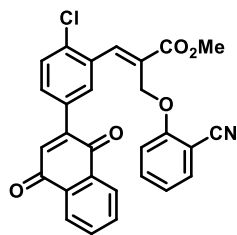

**Methyl (E)-2-((2-cyanophenoxy)methyl)-3-(3-(1,4-dioxo-1,4-dihydronaphthalen-2-yl)-4-methoxyphenyl)acrylate (10f)**

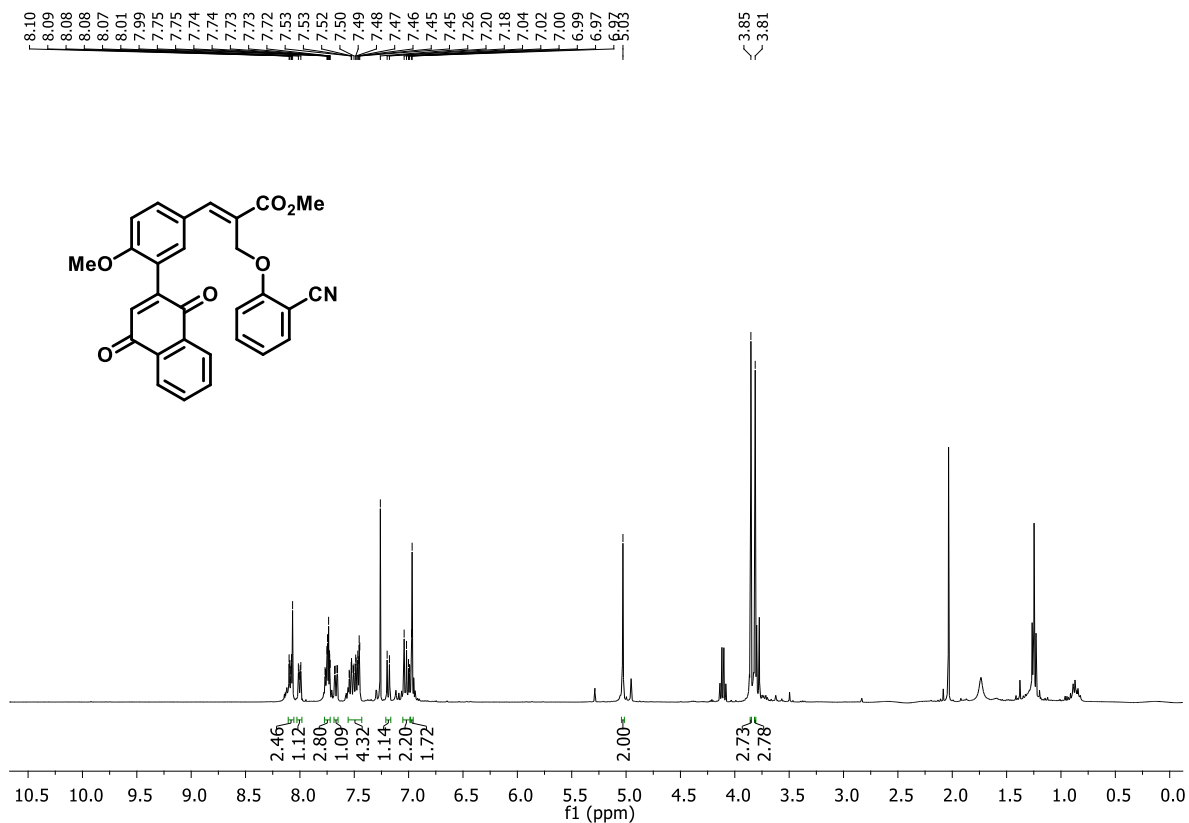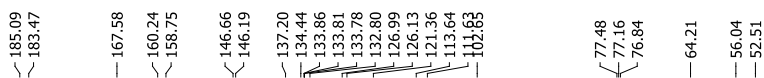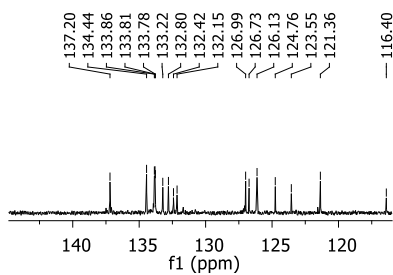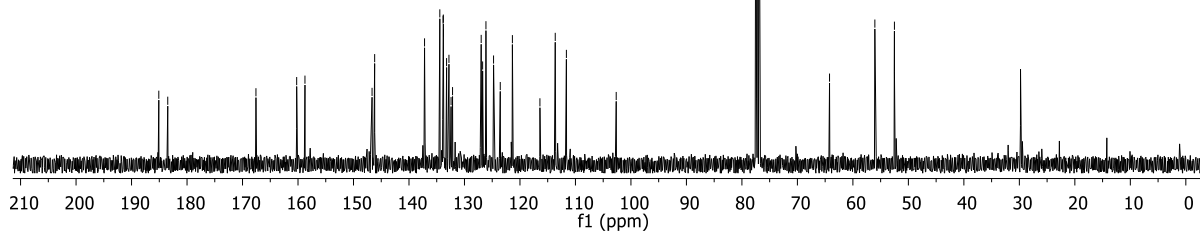

Methyl (*E*)-2-((2-cyanophenoxy)methyl)-3-(3-(1,4-dioxo-1,4-dihydronaphthalen-2-yl)-4-isopropylphenyl)acrylate (10g)

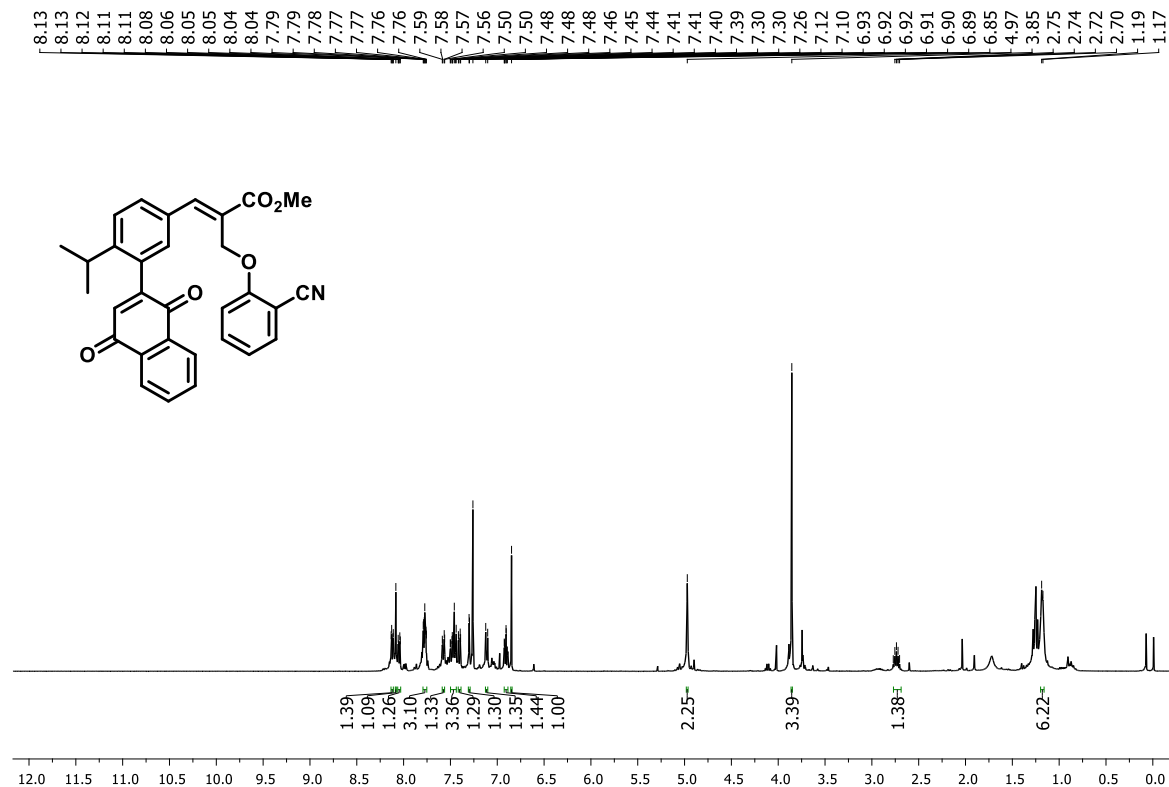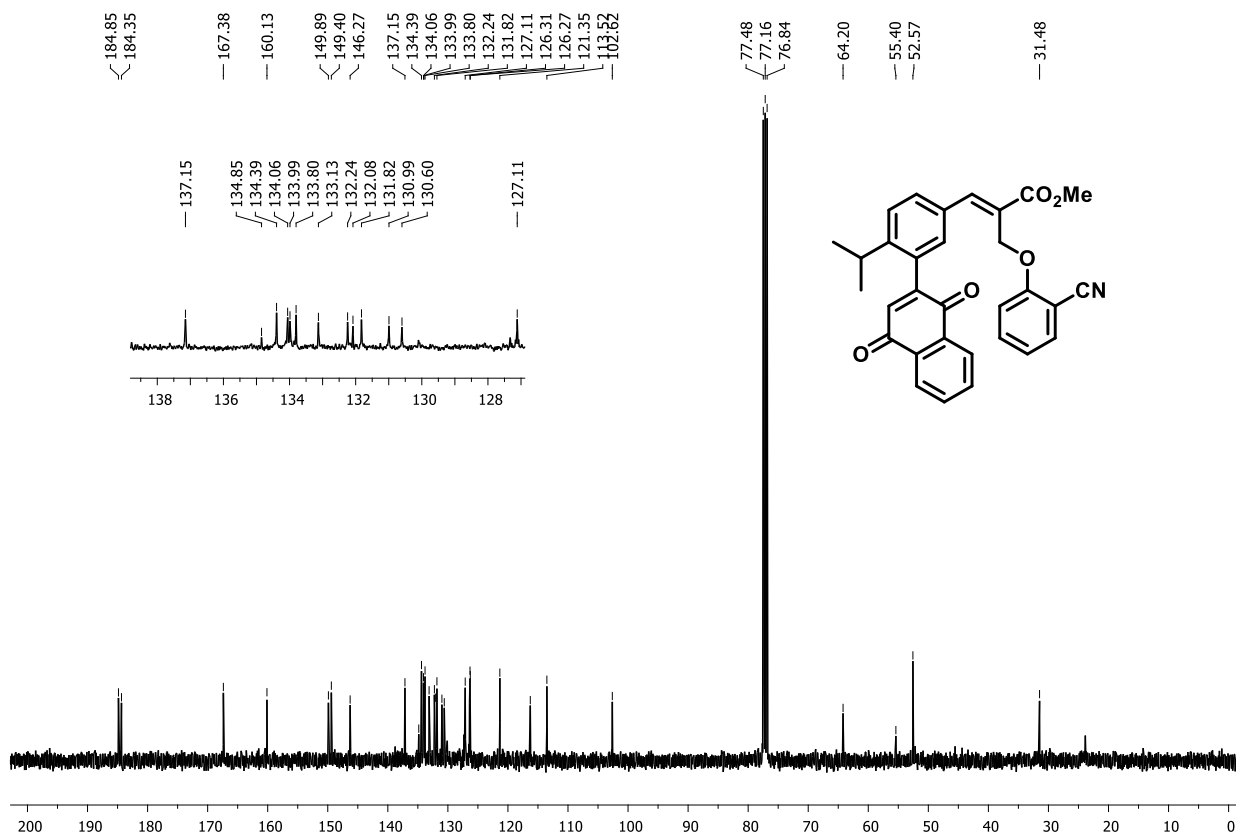

Methyl (E)-3-(4-chloro-3-(1,4-dioxo-1,4-dihydronaphthalen-2-yl)phenyl)-2-((2-cyanophenoxy)methyl)acrylate (10h)

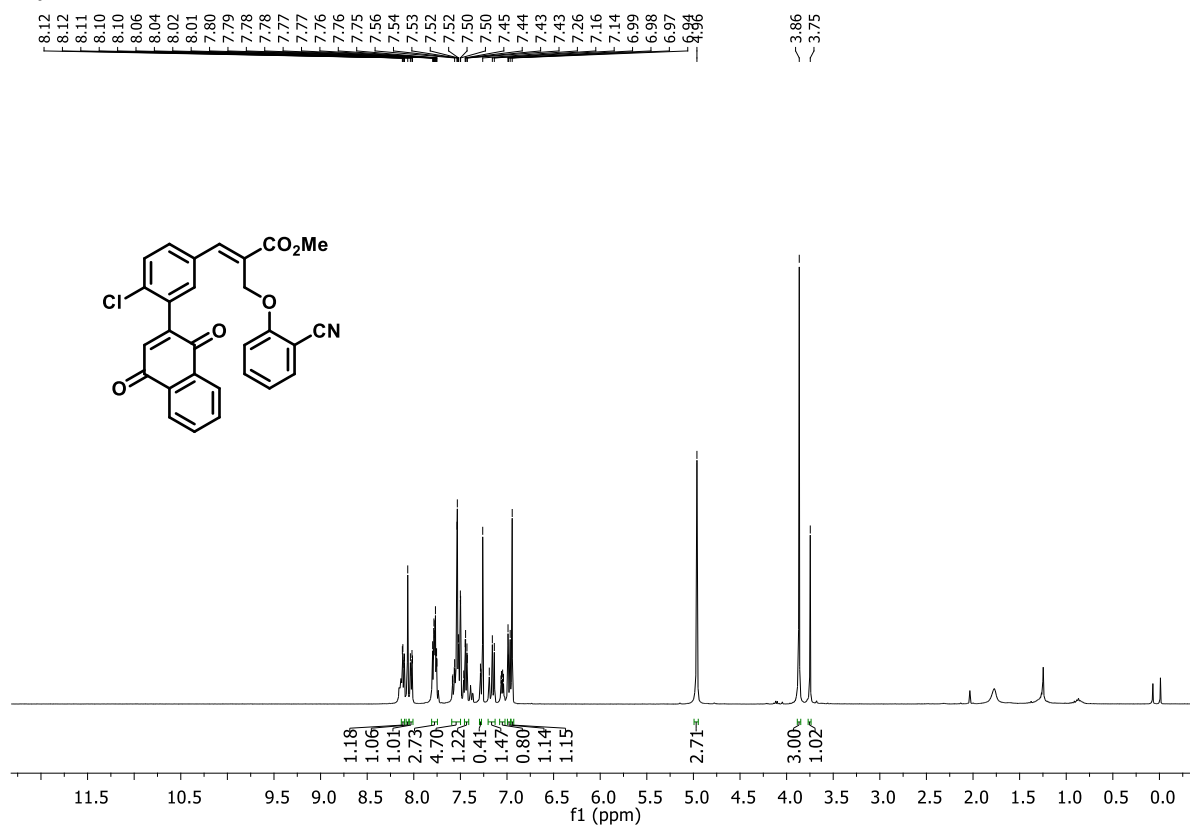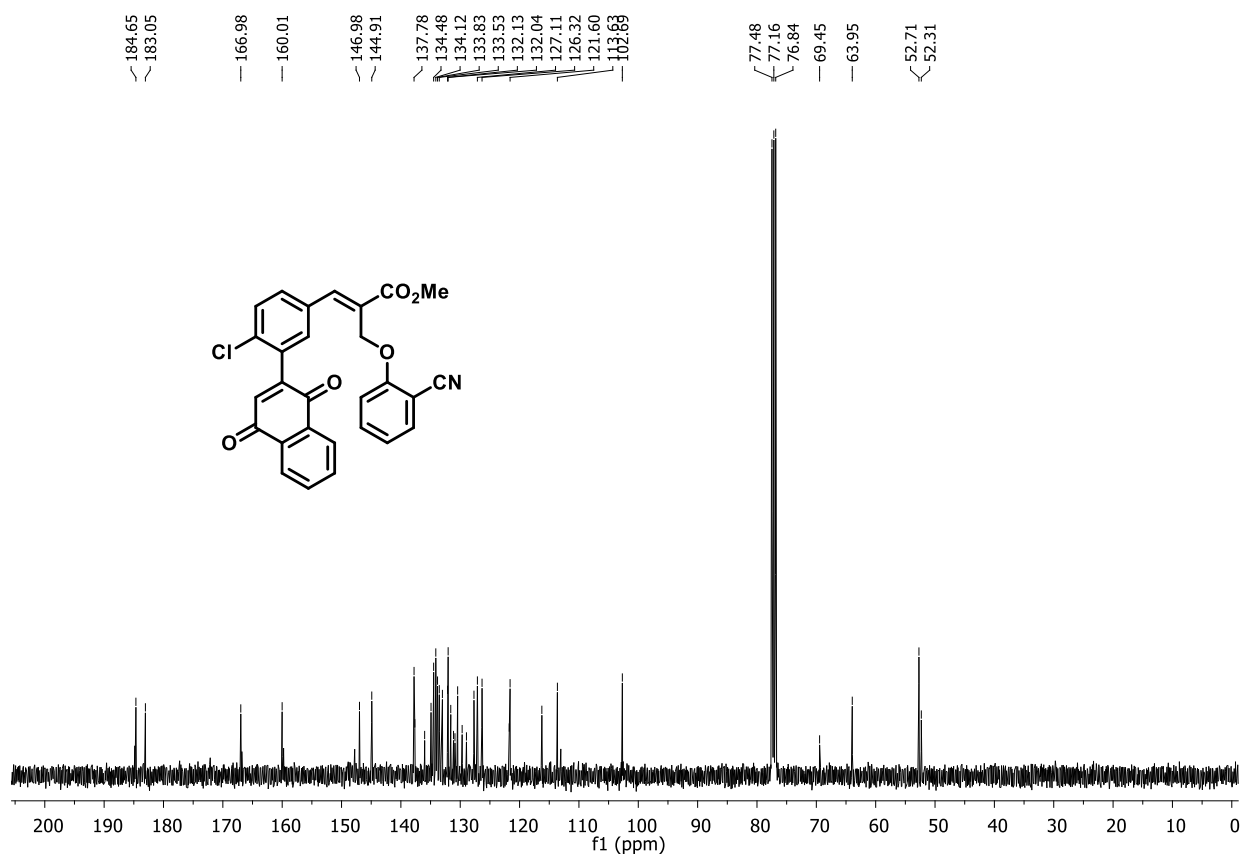



**Methyl (E)-3-(4-bromo-3-(1,4-dioxo-1,4-dihydronaphthalen-2-yl)phenyl)-2-((2-cyanophenoxy)methyl)acrylate (10i)**

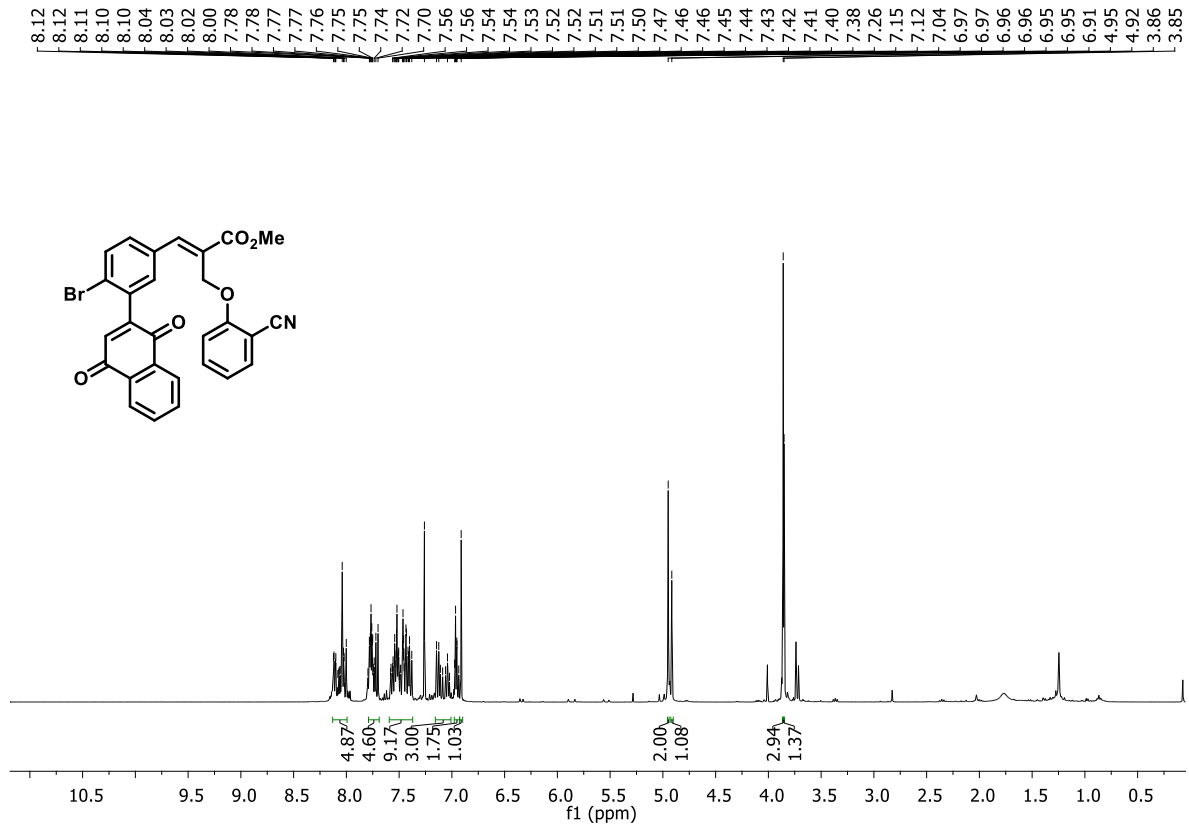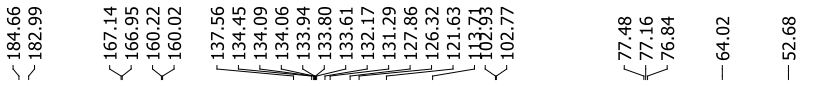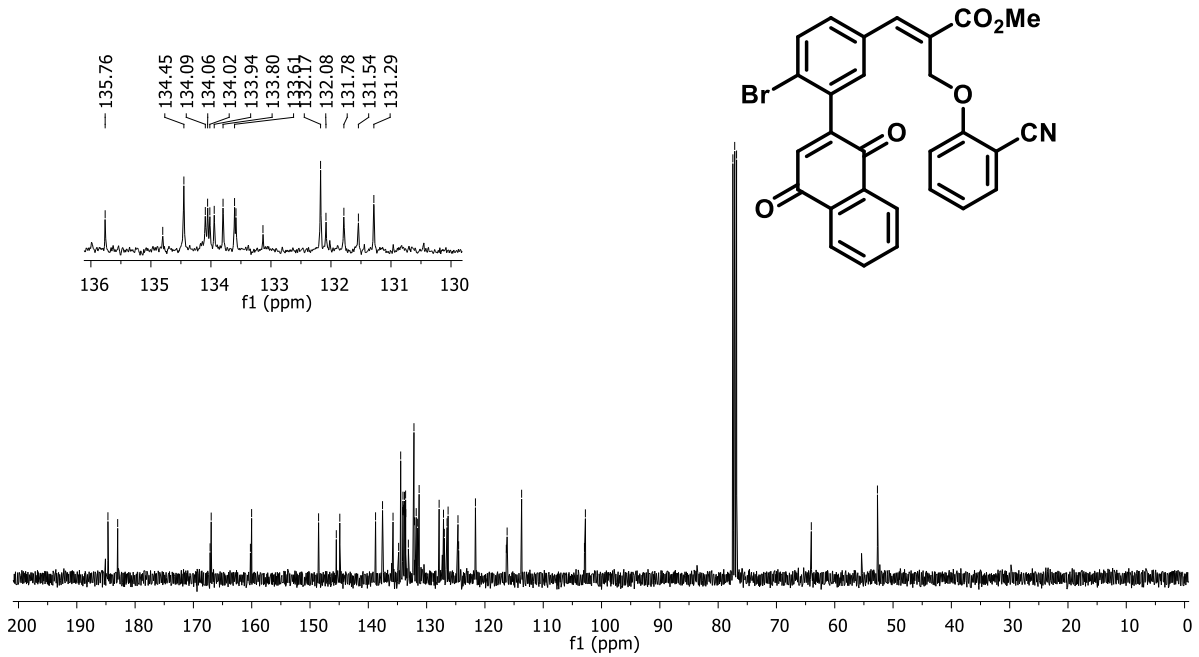

**Ethyl (*E*)-2-((2-cyanophenoxy)methyl)-3-(3-(1,4-dioxo-1,4-dihydronaphthalen-2-yl)phenyl)acrylate (10j)**

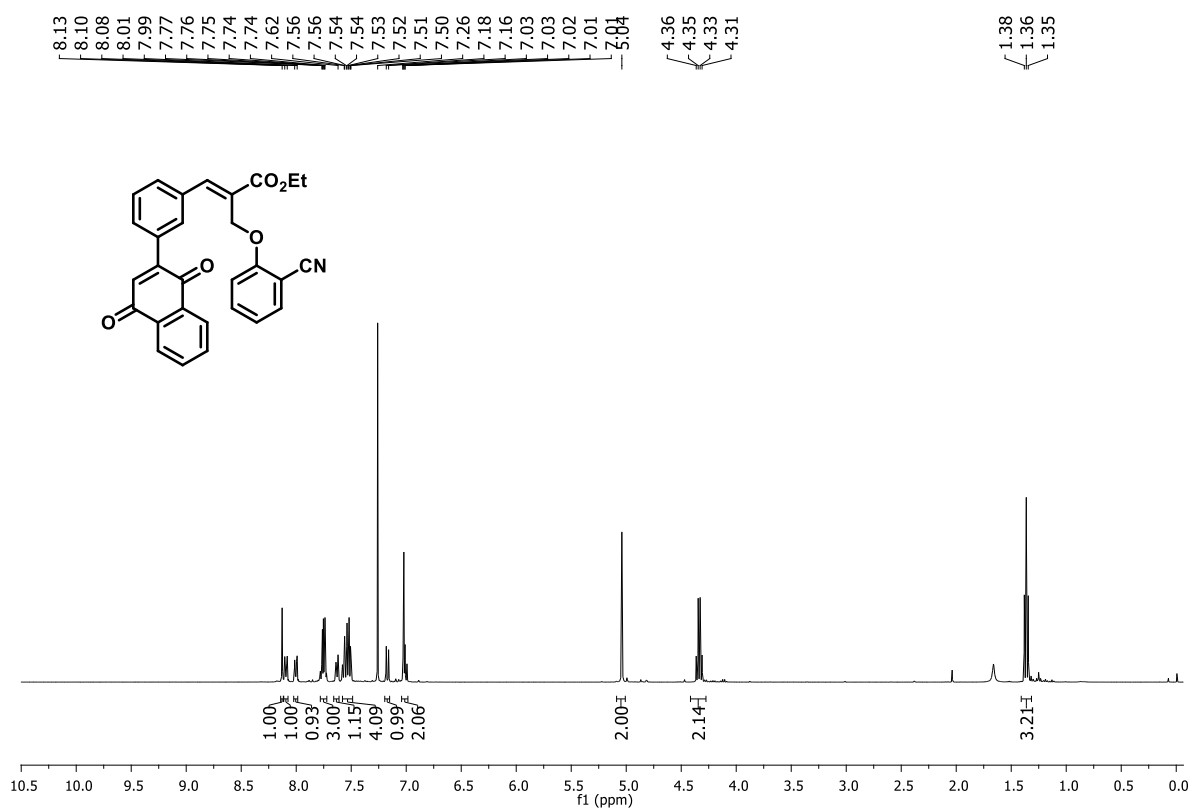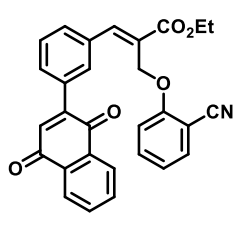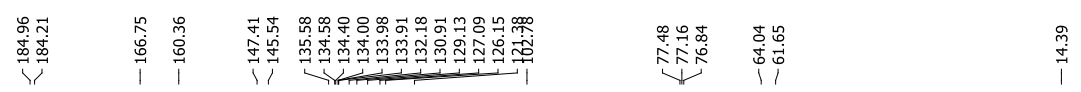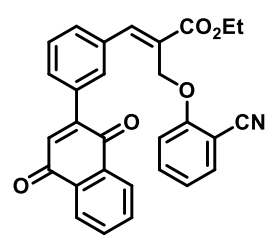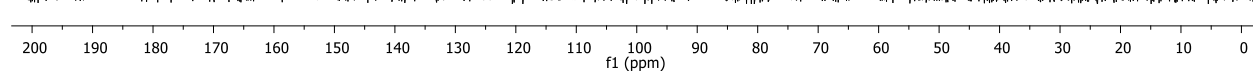

Butyl (*E*)-2-((2-cyanophenoxy)methyl)-3-(3-(1,4-dioxo-1,4-dihydronaphthalen-2-yl)phenyl)acrylate (10k)

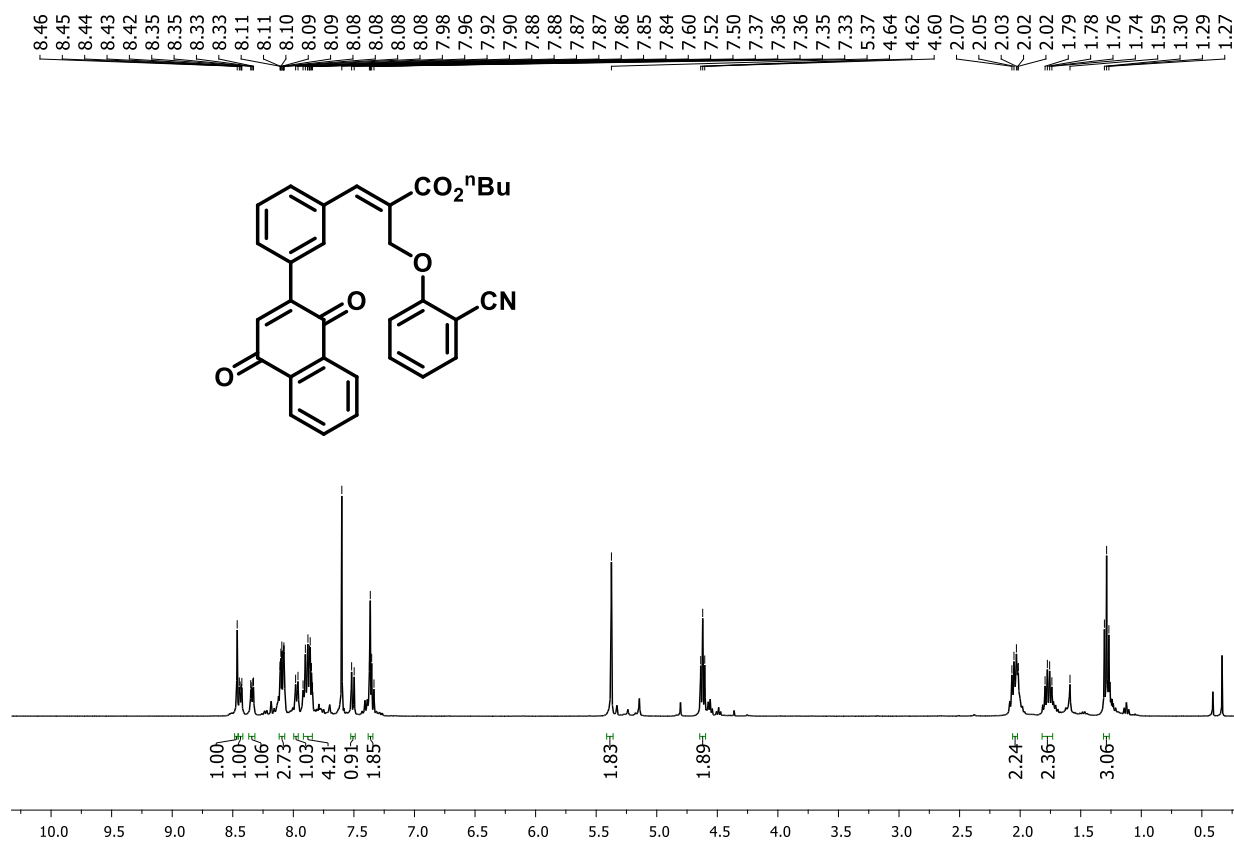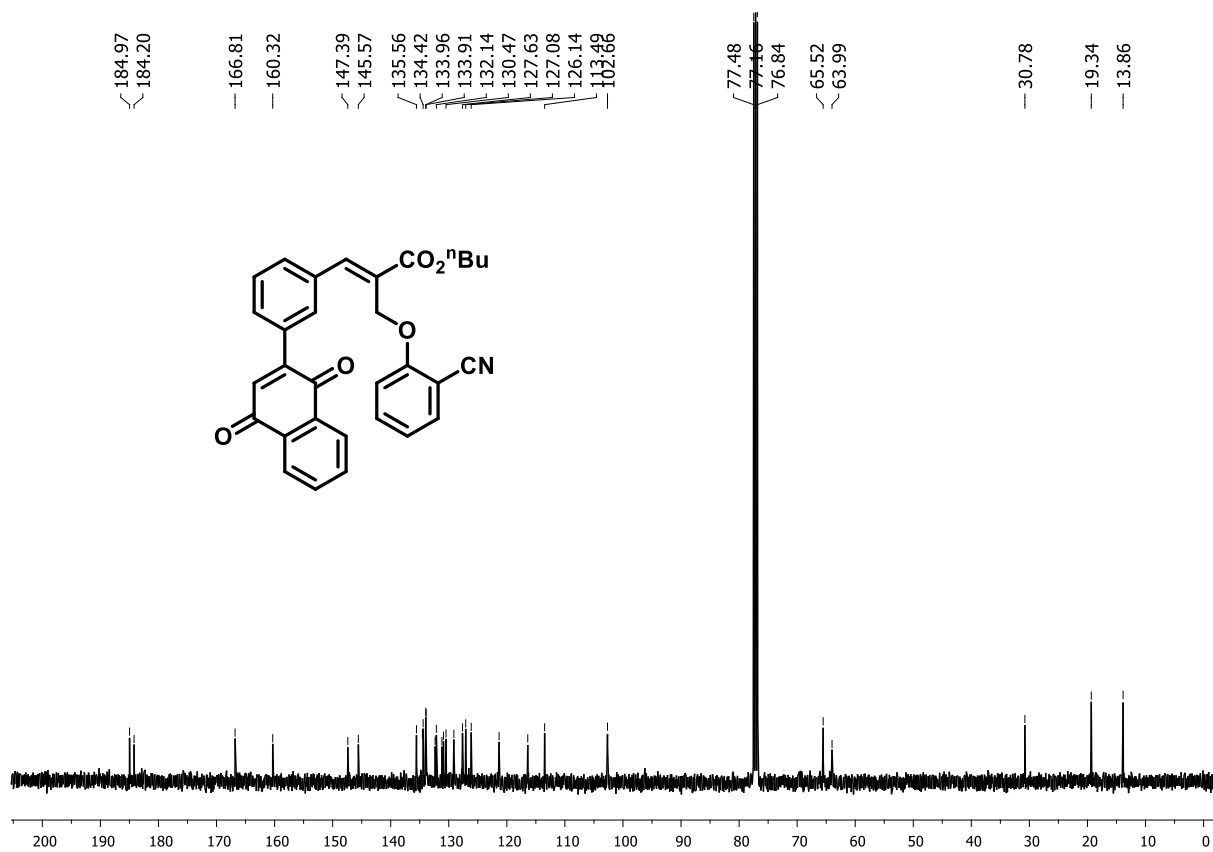

**Ethyl (E)-3-(4-chloro-3-(1,4-dioxo-1,4-dihydronaphthalen-2-yl)phenyl)-2-((2-cyanophenoxy)methyl)acrylate (10l)**

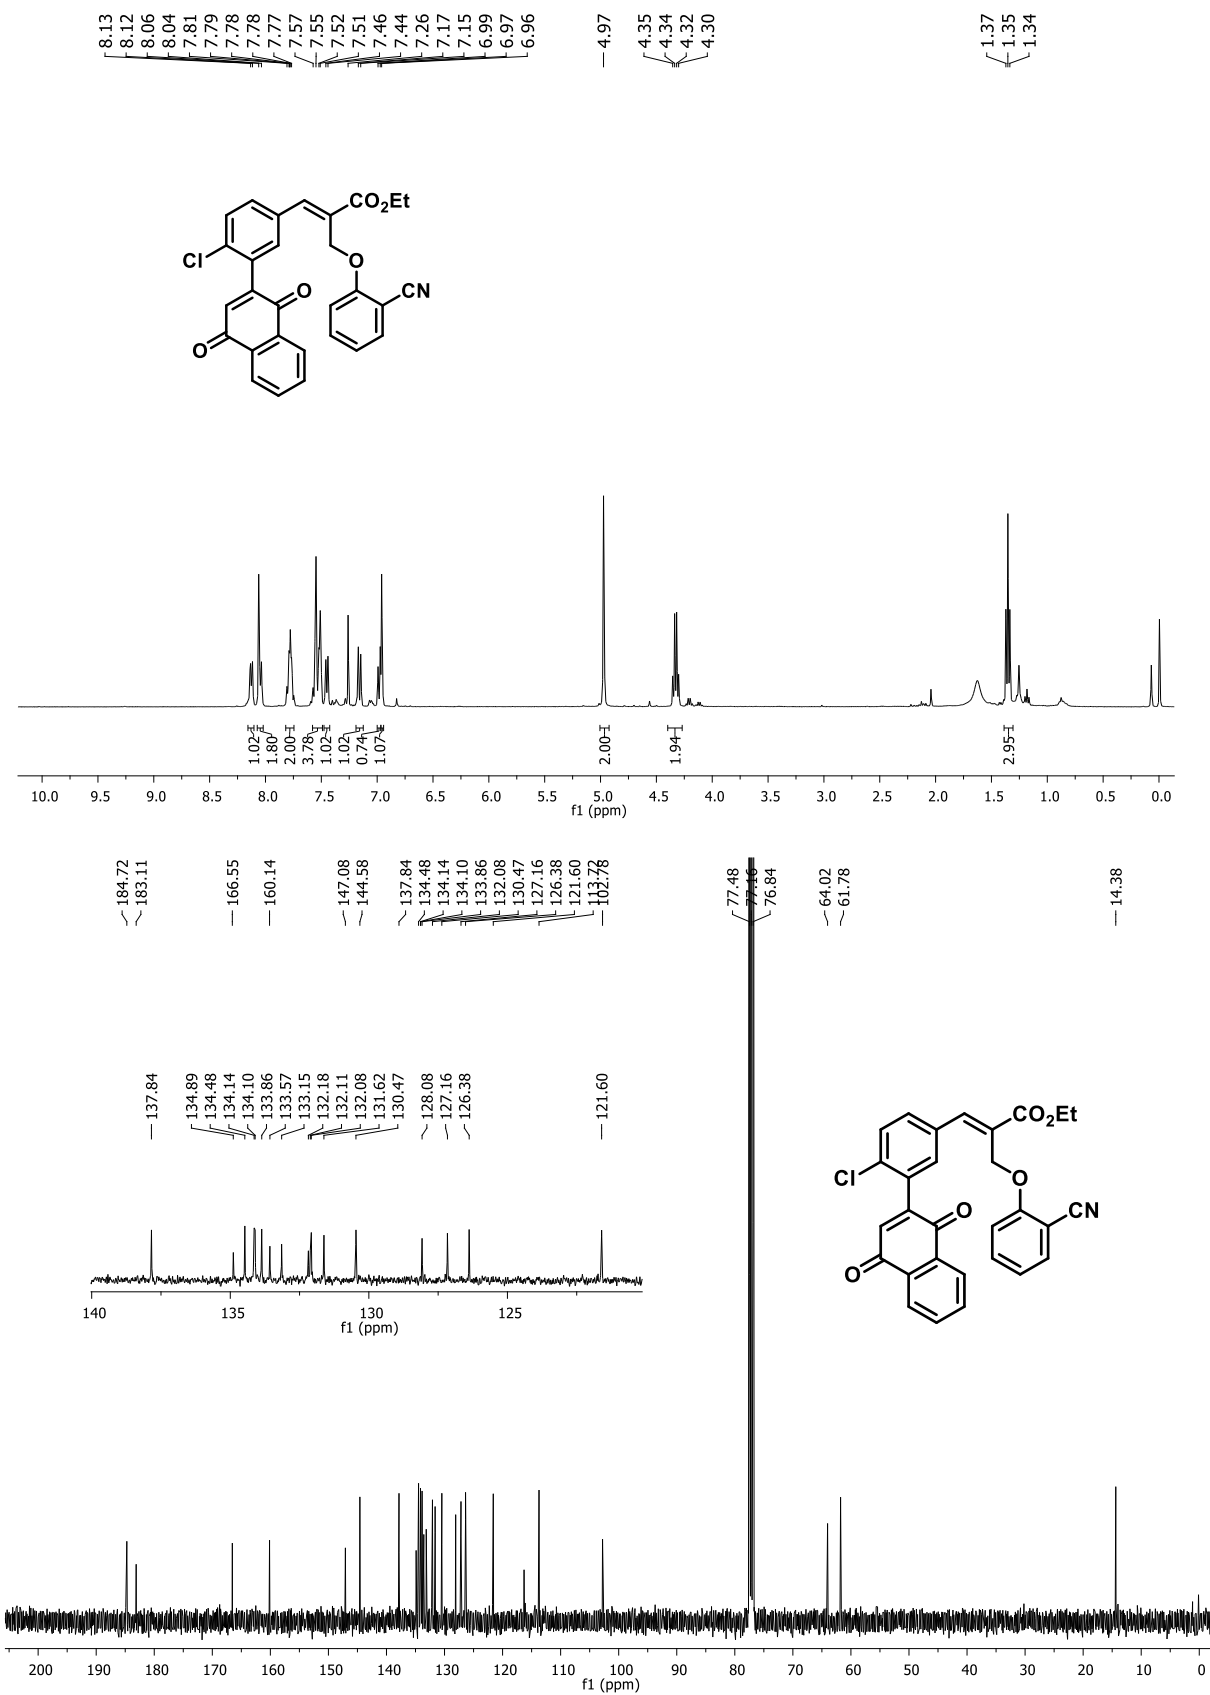

Methyl (*E*)-2-((2-cyanophenoxy)methyl)-3-(2',5'-dioxo-2',5'-dihydro-[1,1'-biphenyl]-3-yl)acrylate (10m)

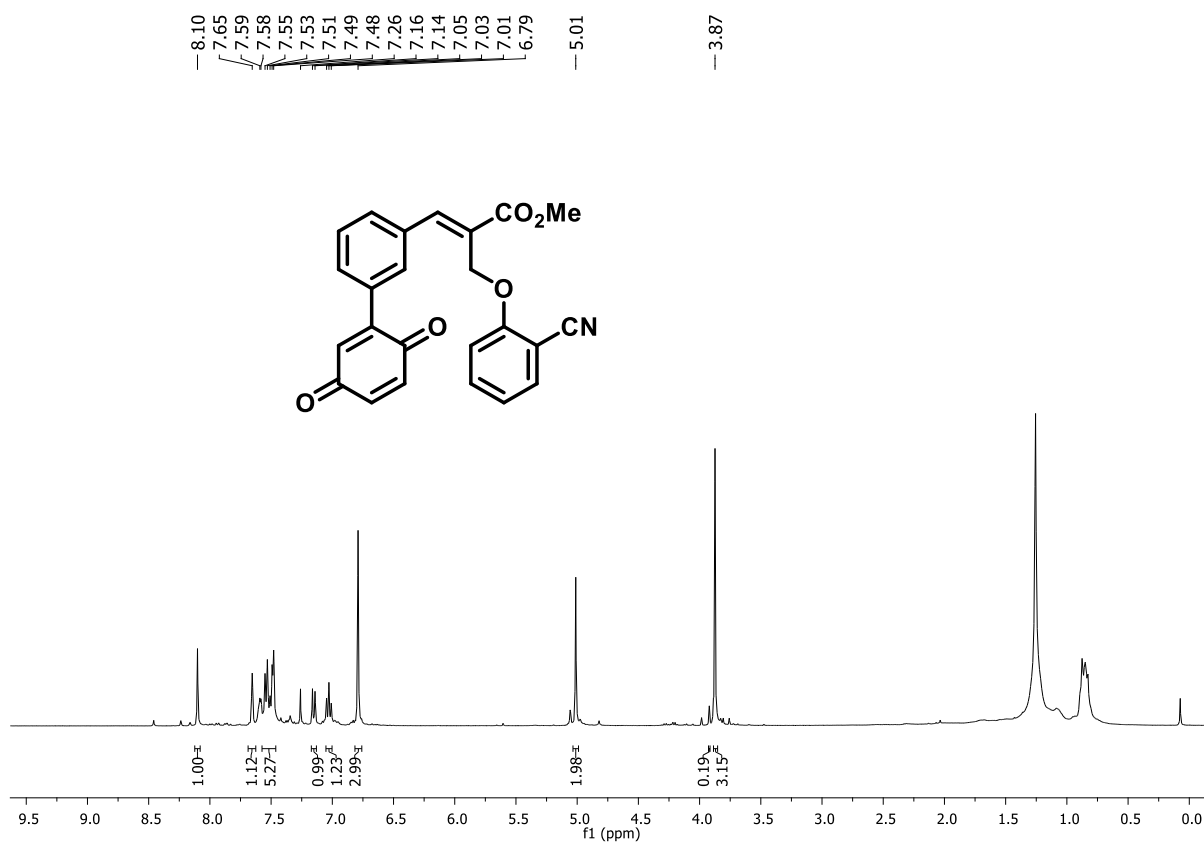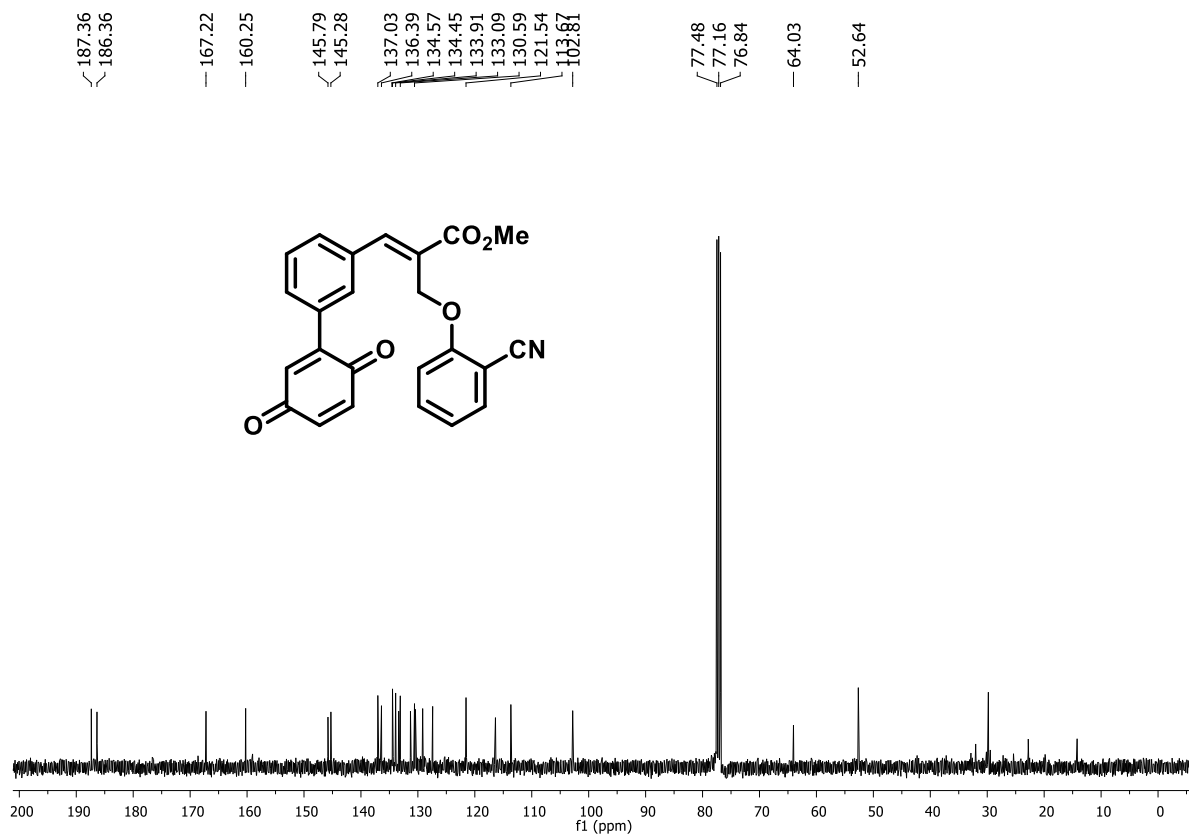

**Ethyl (*E*)-2-((2-cyanophenoxy)methyl)-3-(2',5'-dioxo-2',5'-dihydro-[1,1'-biphenyl]-3-yl)acrylate (10n)**

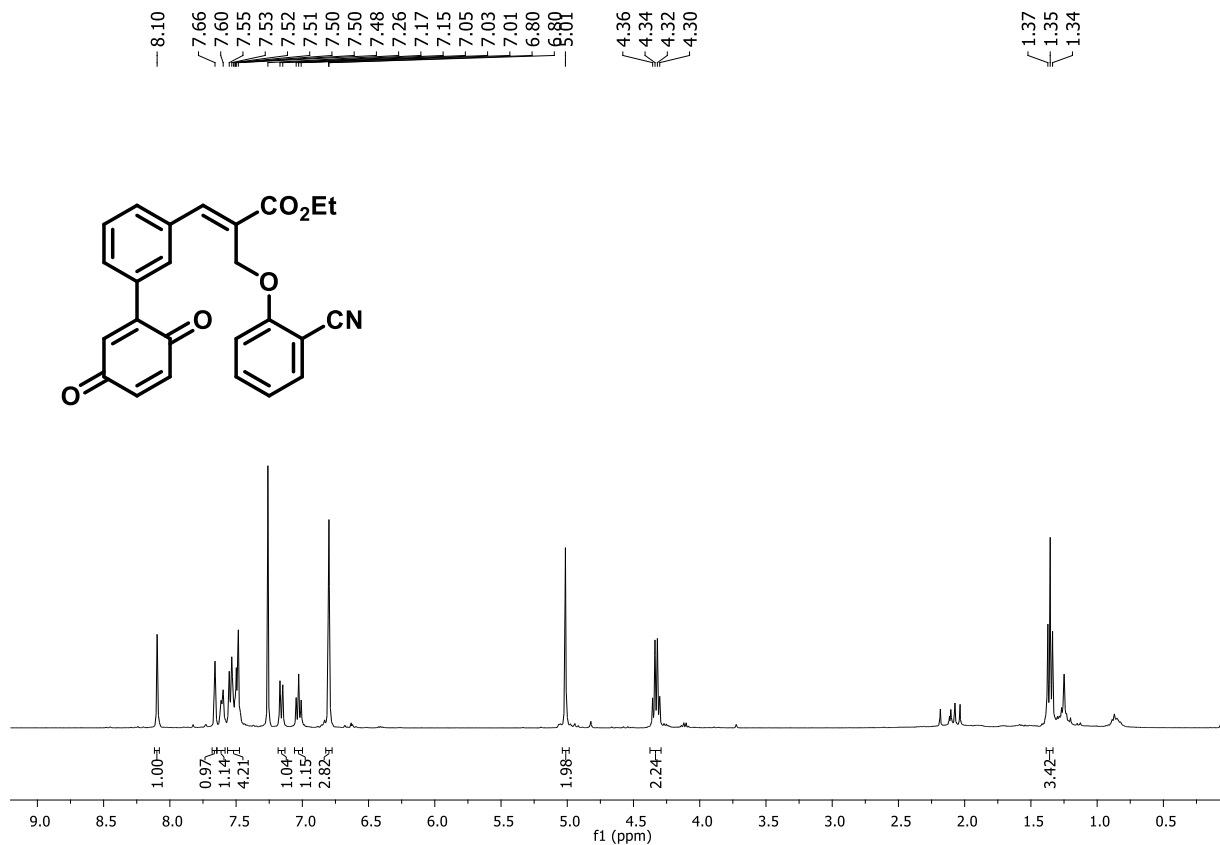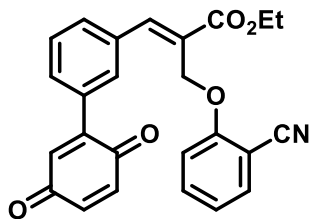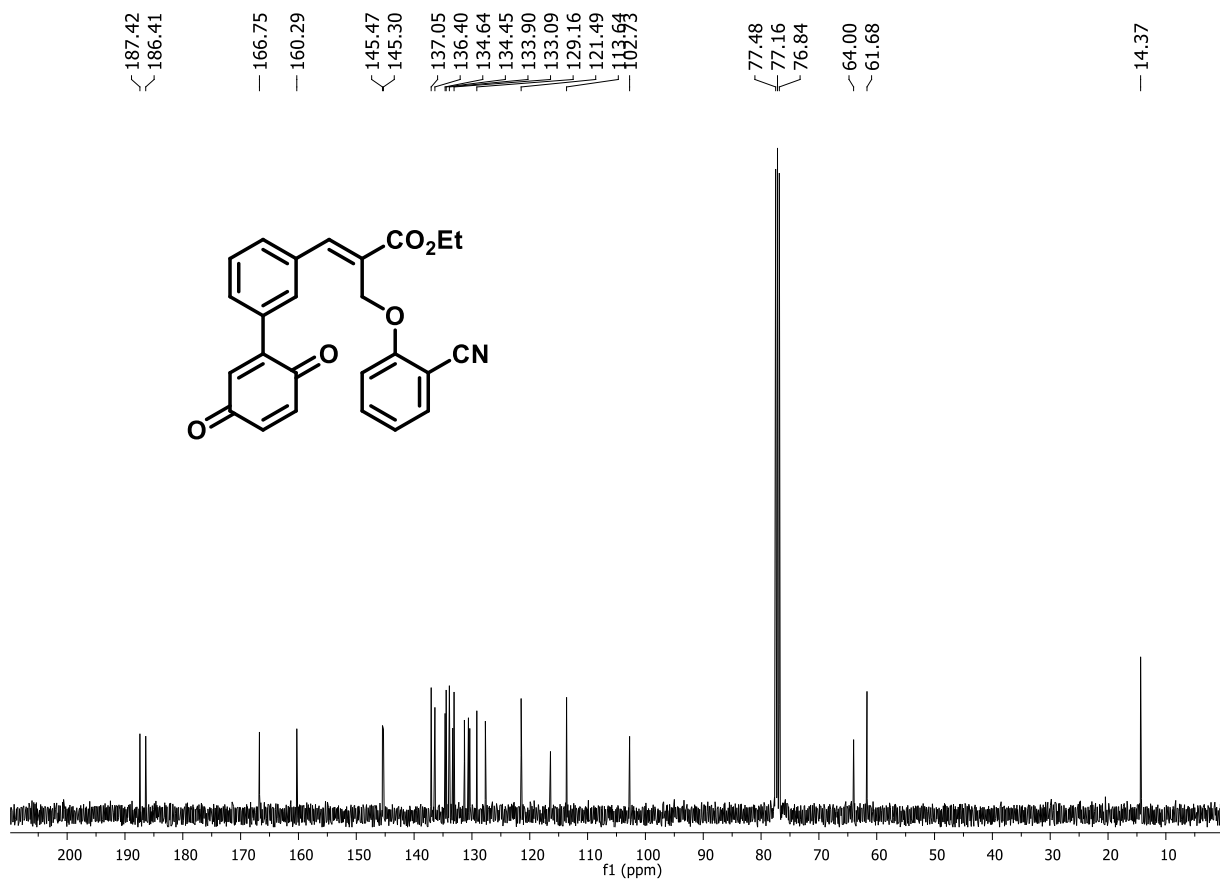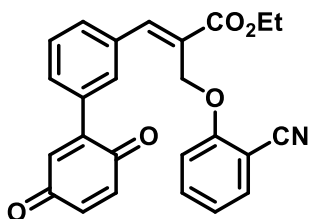

**Methyl (E)-2-((2-cyanophenoxy)methyl)-3-(4-methyl-2',5'-dioxo-2',5'-dihydro-[1,1'-biphenyl]-3-yl)acrylate (10o)**

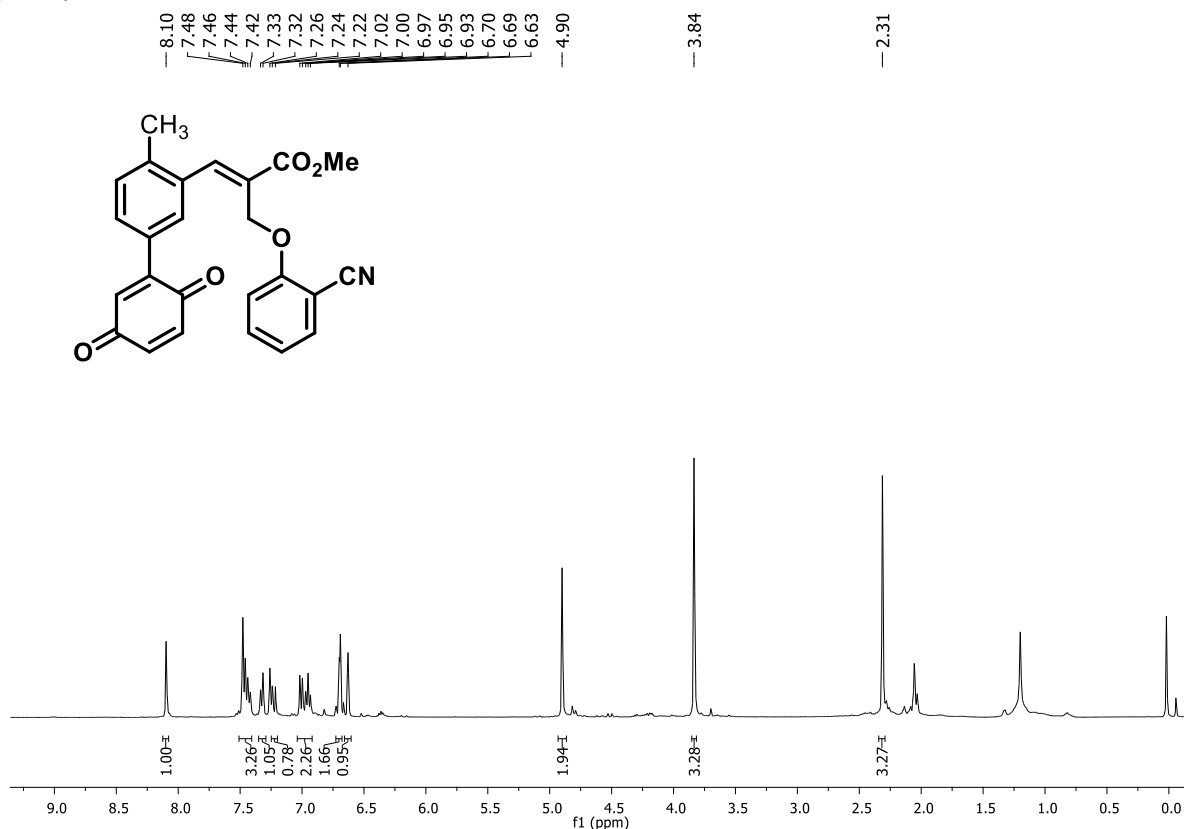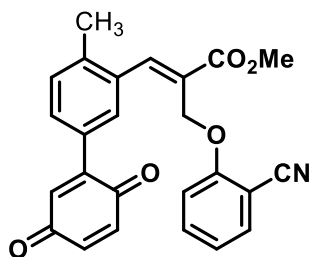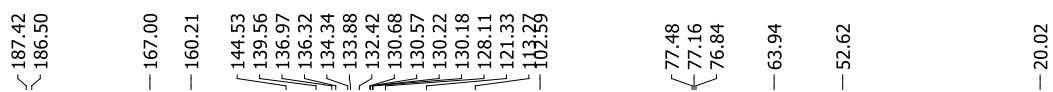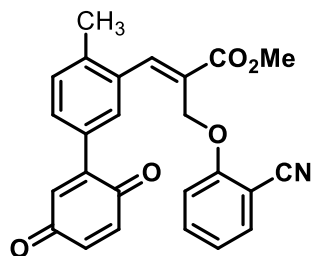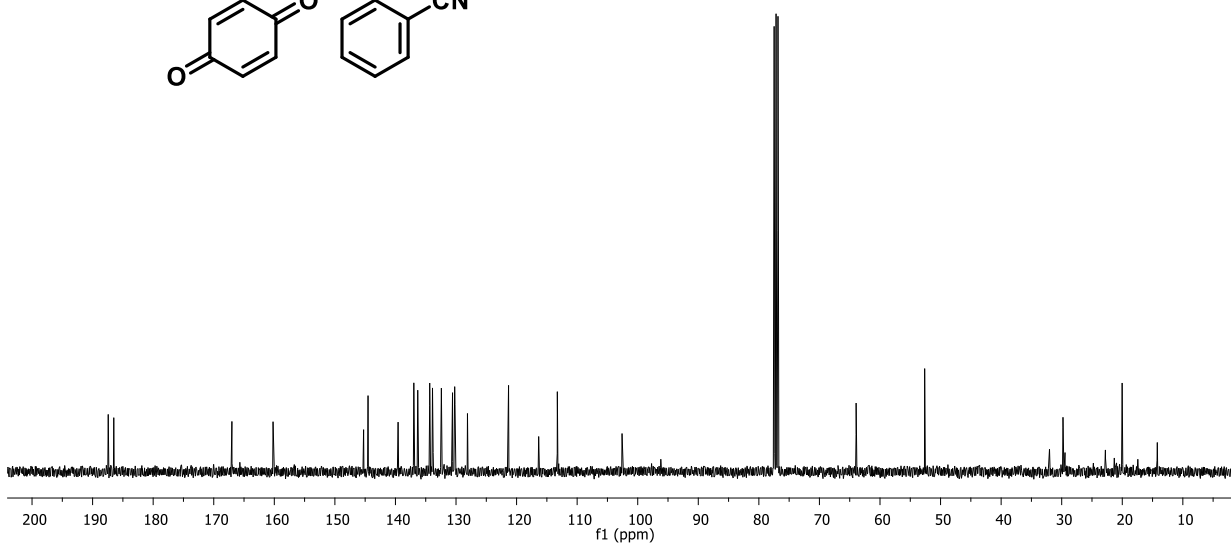

Methyl (*E*)-2-((2-cyanophenoxy)methyl)-3-(6-methyl-2',5'-dioxo-2',5'-dihydro-[1,1'-biphenyl]-3-yl)acrylate (10p)

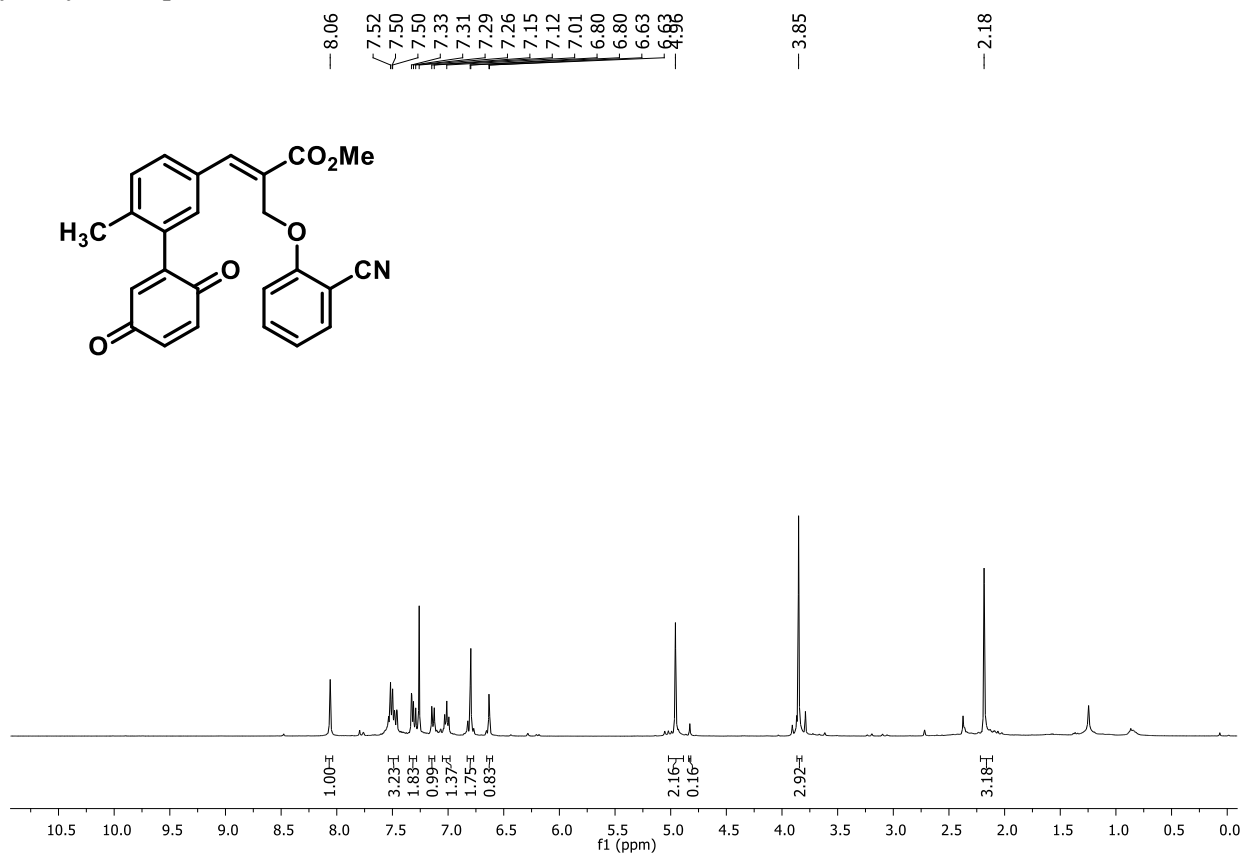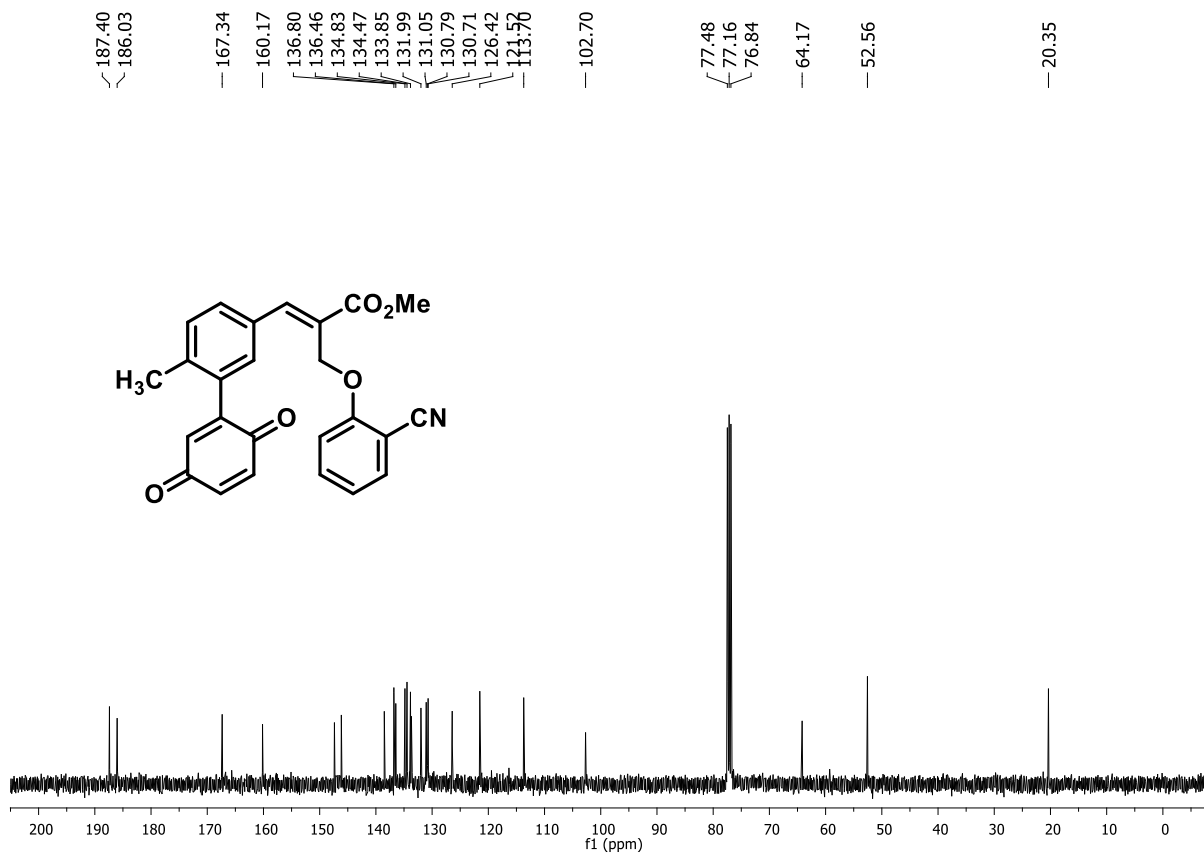



**Methyl (*E*)-2-((2-cyanophenoxy)methyl)-3-(6-fluoro-2',5'-dioxo-2',5'-dihydro-[1,1'-biphenyl]-3-yl)acrylate (10q)**

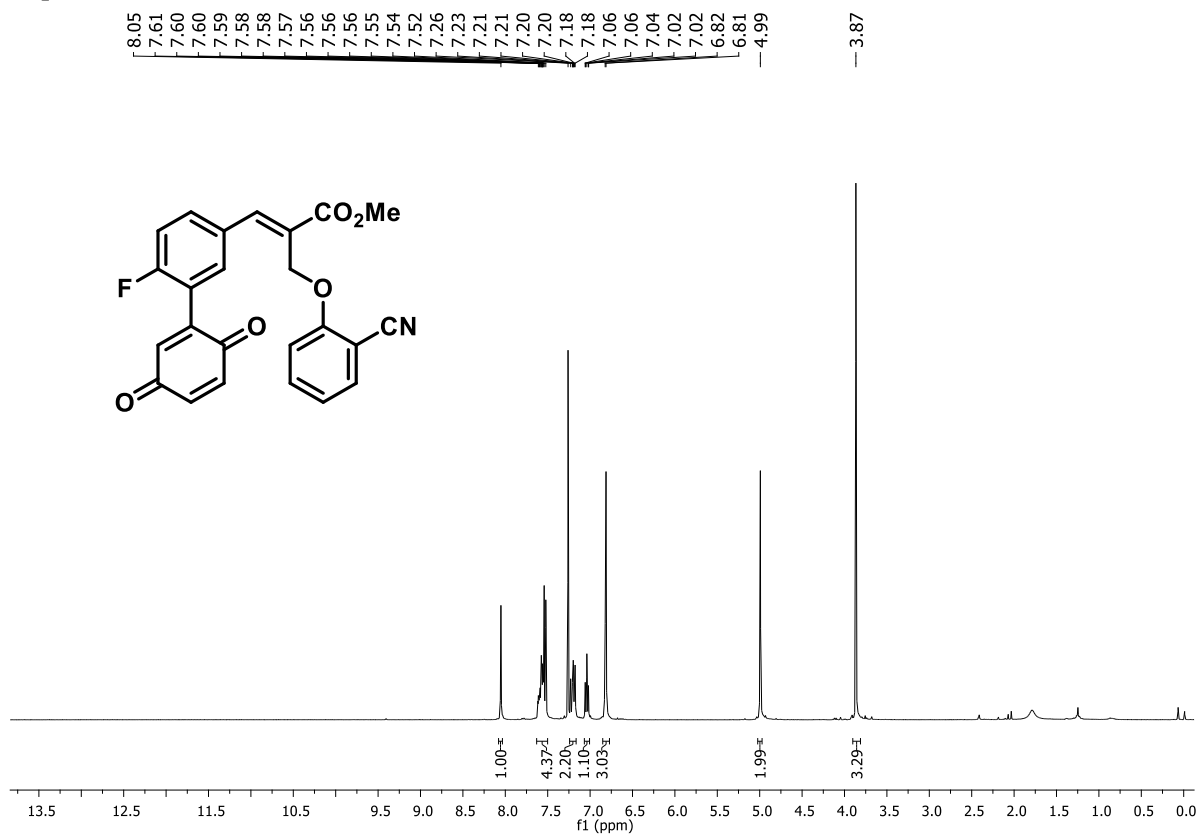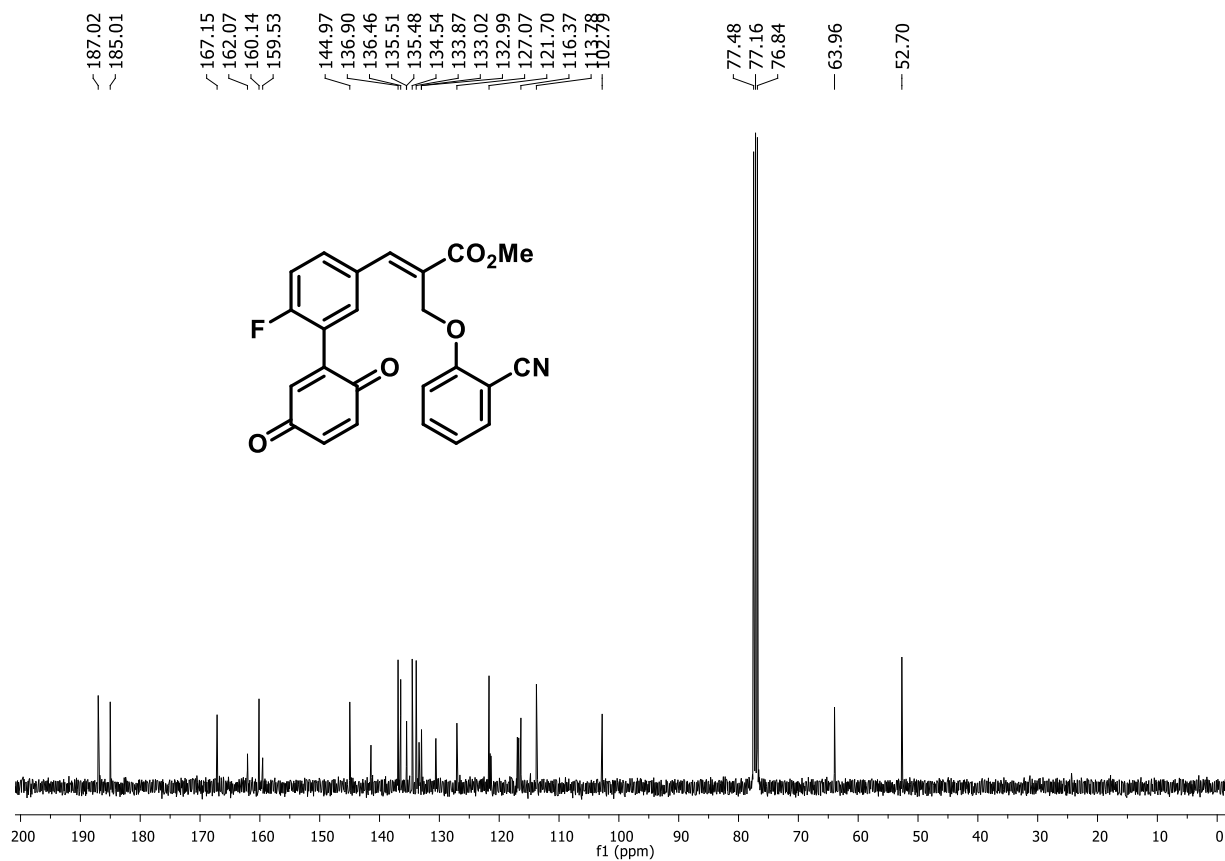

Methyl  
yl)acrylate (10r)

(E)-2-((2-cyanophenoxy)methyl)-3-(6-bromo-2',5'-dioxo-2',5'-dihydro-[1,1'-biphenyl]-3-

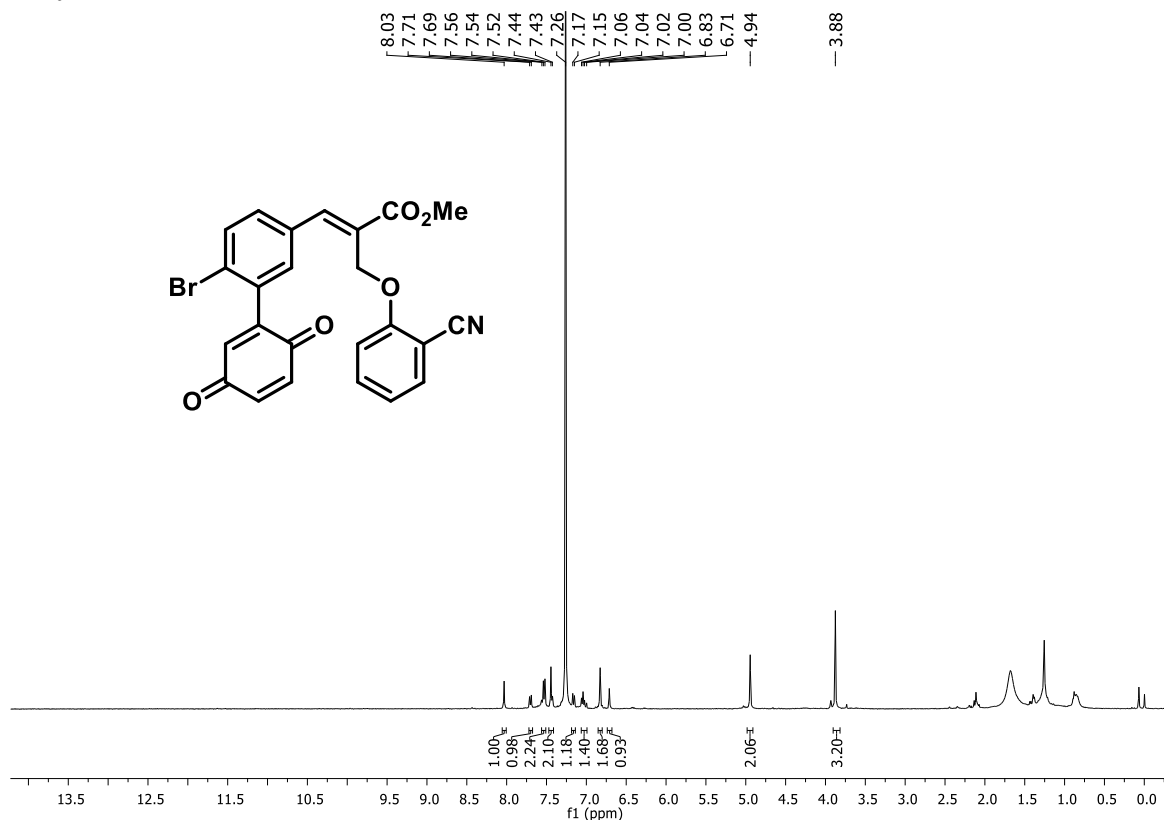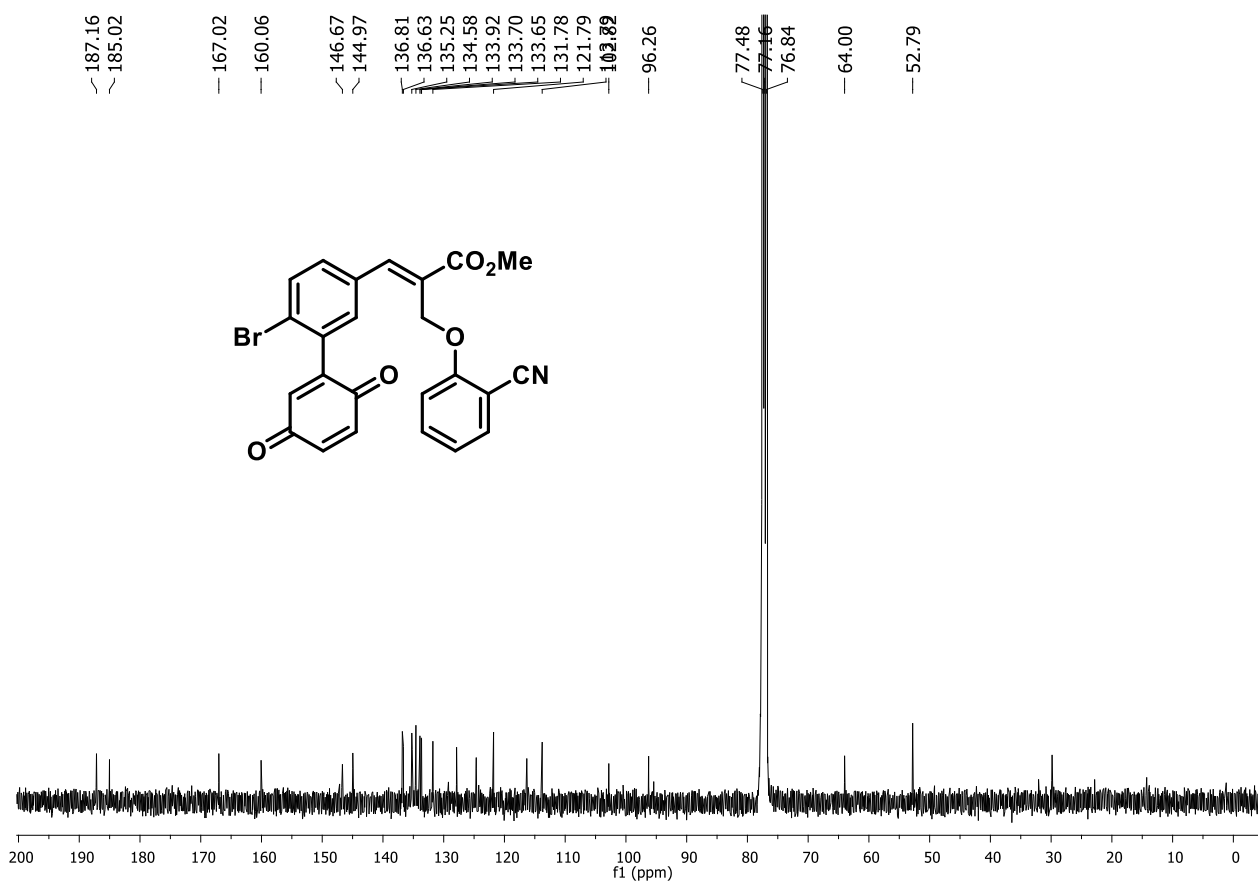

**Ethyl (*E*)-3-(6-chloro-2',5'-dioxo-2',5'-dihydro-[1,1'-biphenyl]-3-yl)-2-((2-cyanophenoxy)methyl)acrylate (10s)**

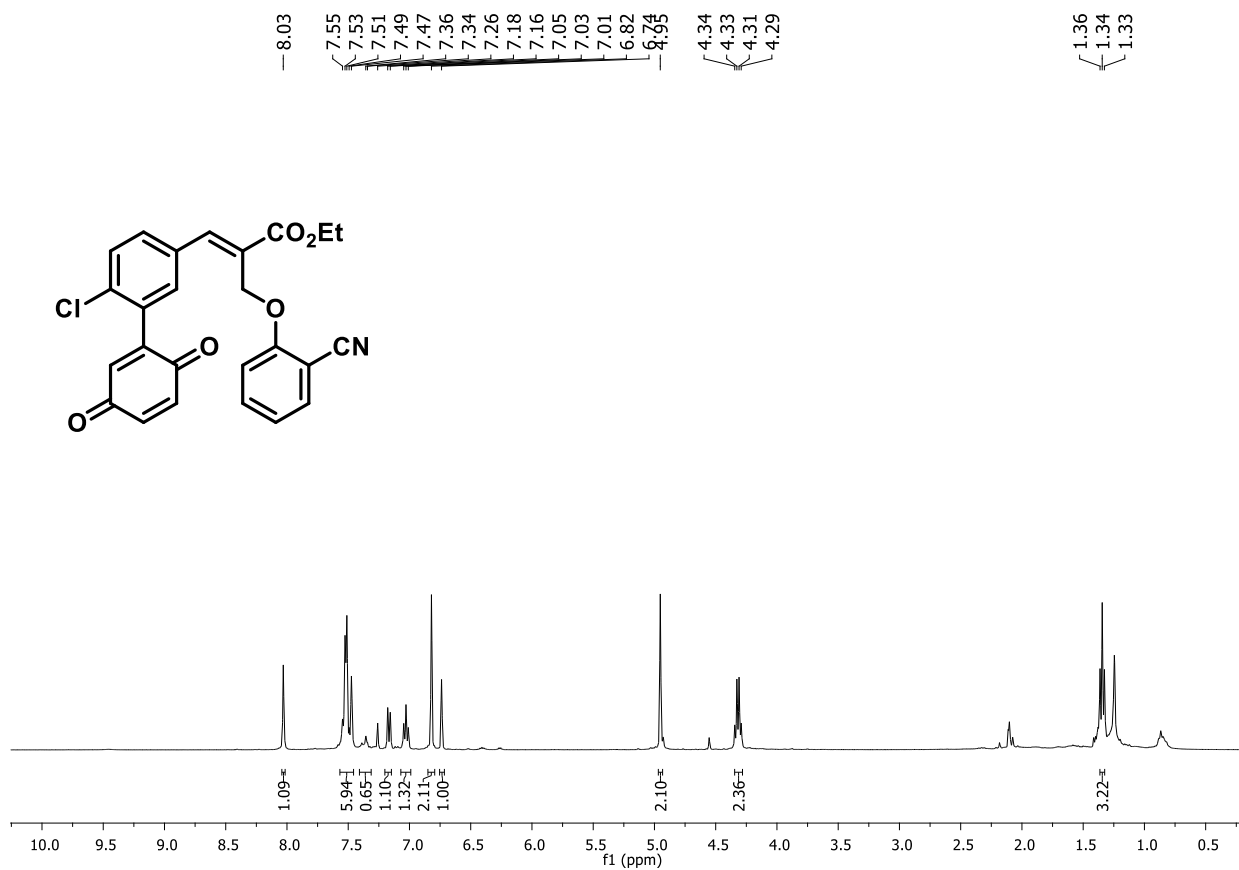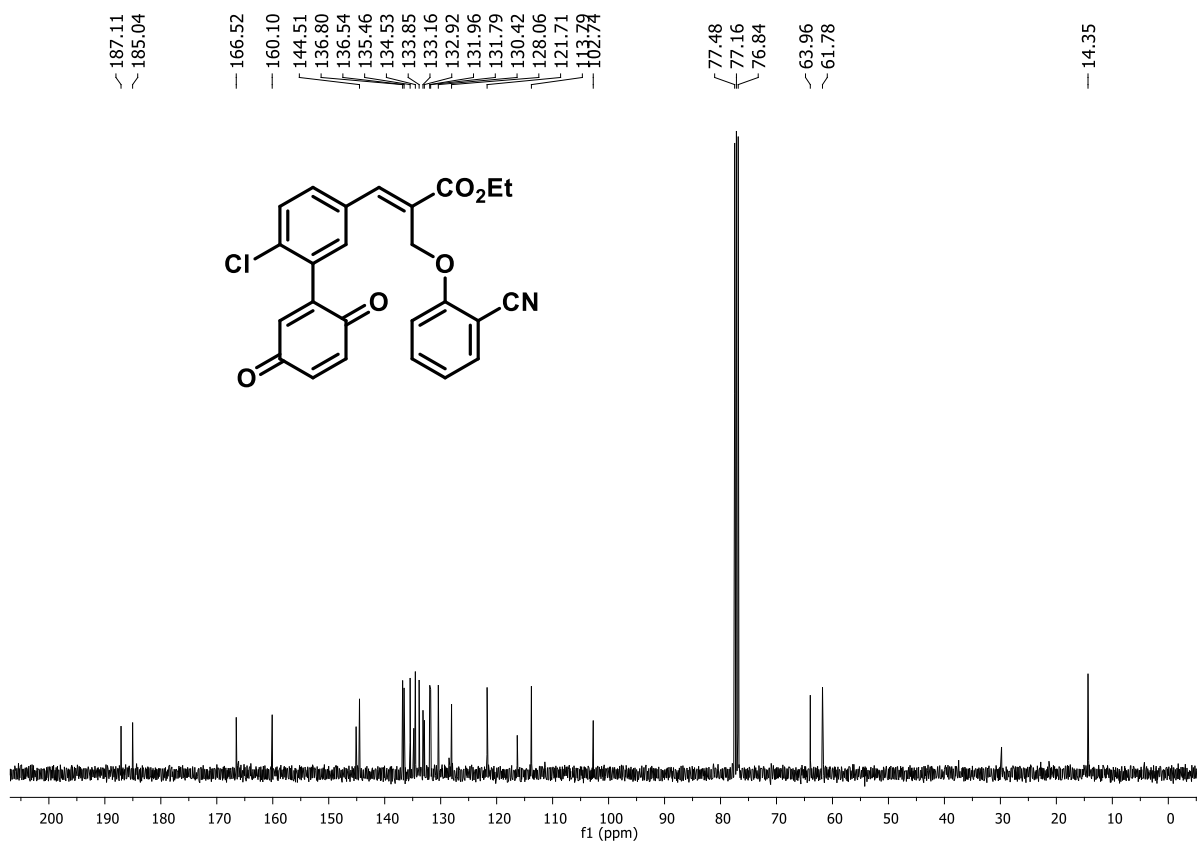

Methyl (*E*)-3-(4'-(*tert*-butyl)-2',5'-dioxo-2',5'-dihydro-[1,1'-biphenyl]-3-yl)-2-((2-cyanophenoxy)methyl)acrylate (10t) (78:22)

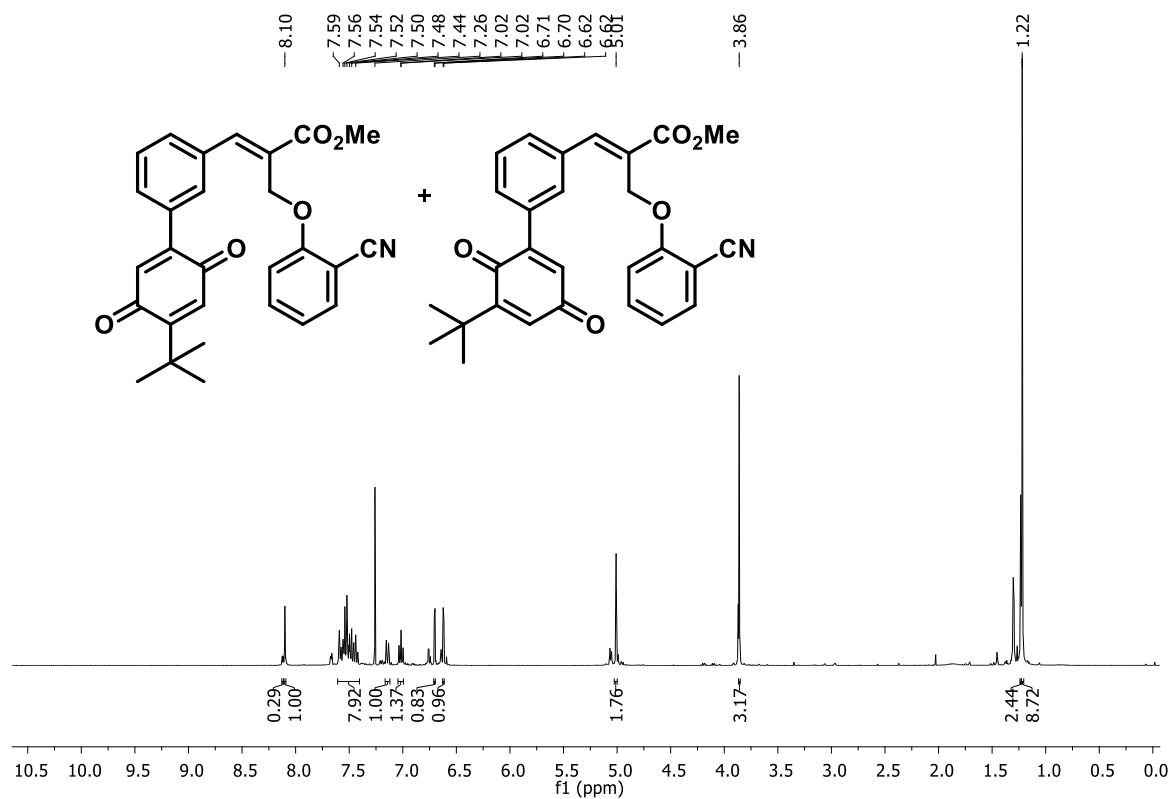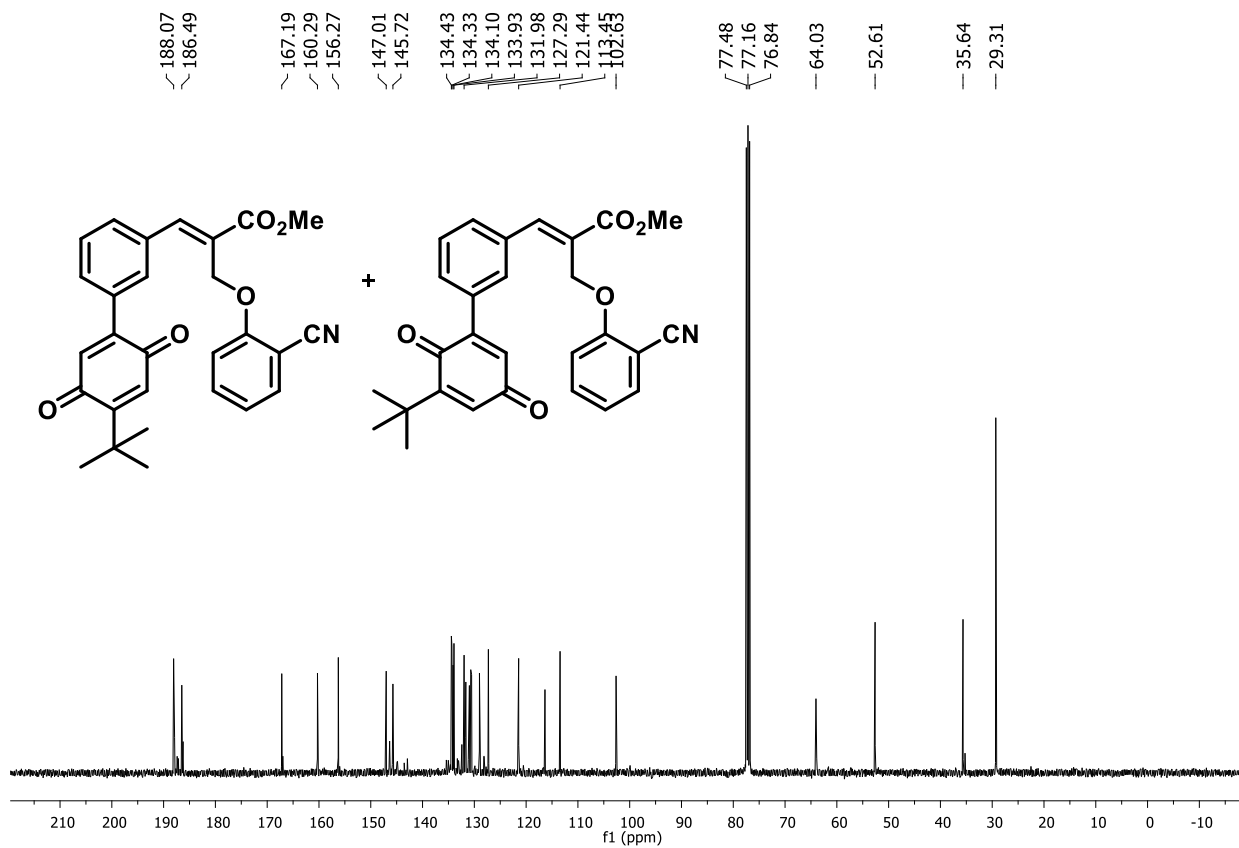

Methyl (E)-2-((2-cyanophenoxy)methyl)-3-(3'-methyl-2',5'-dioxo-2',5'-dihydro-[1,1'-biphenyl]-3-yl)acrylate (10u) (54:46)

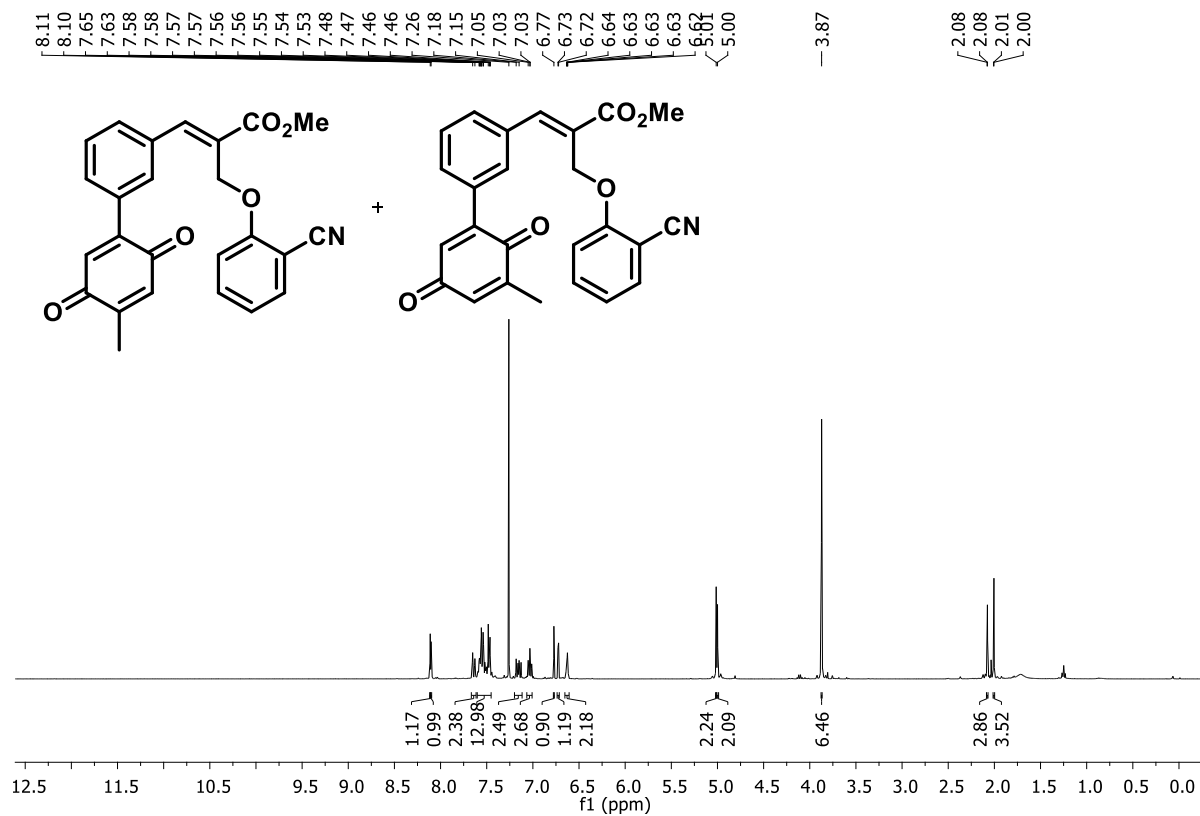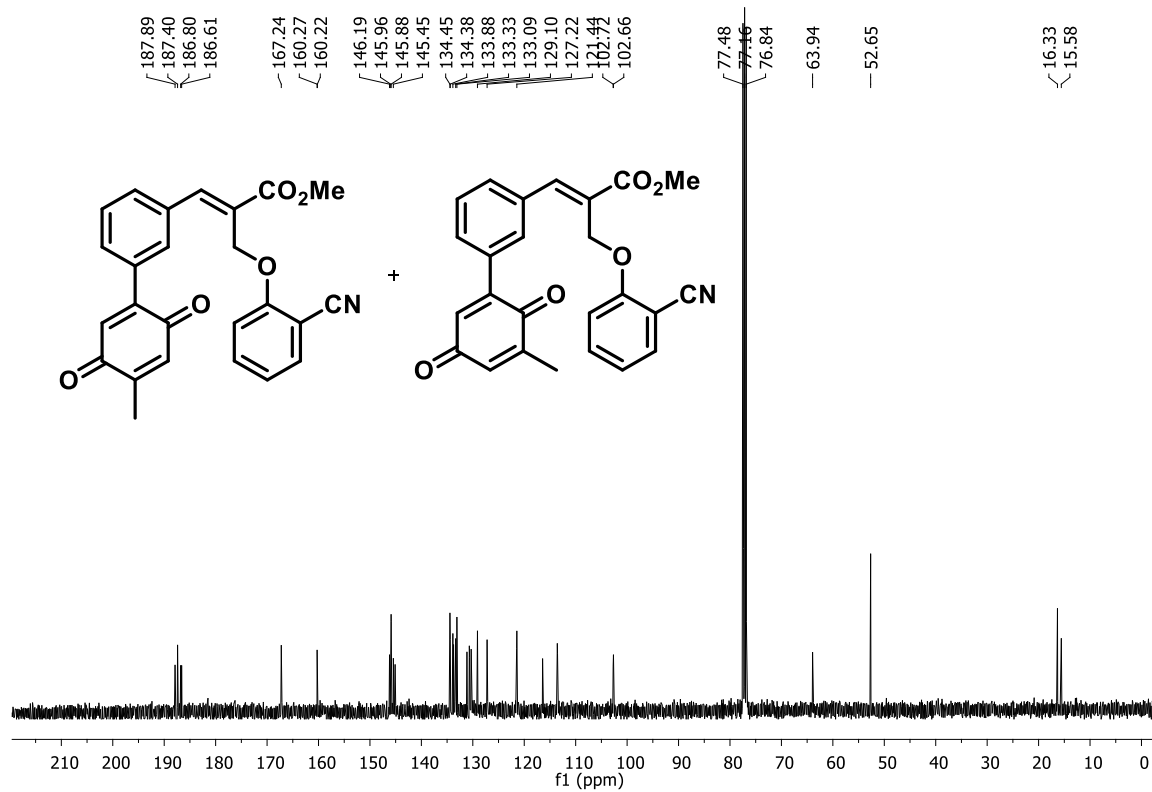

**Methyl (*E*)-3-(3'-(*tert*-butyl)-6-methyl-2',5'-dioxo-2',5'-dihydro-[1,1'-biphenyl]-3-yl)-2-((2-cyanophenoxy)methyl)acrylate (10v) (51:49)**

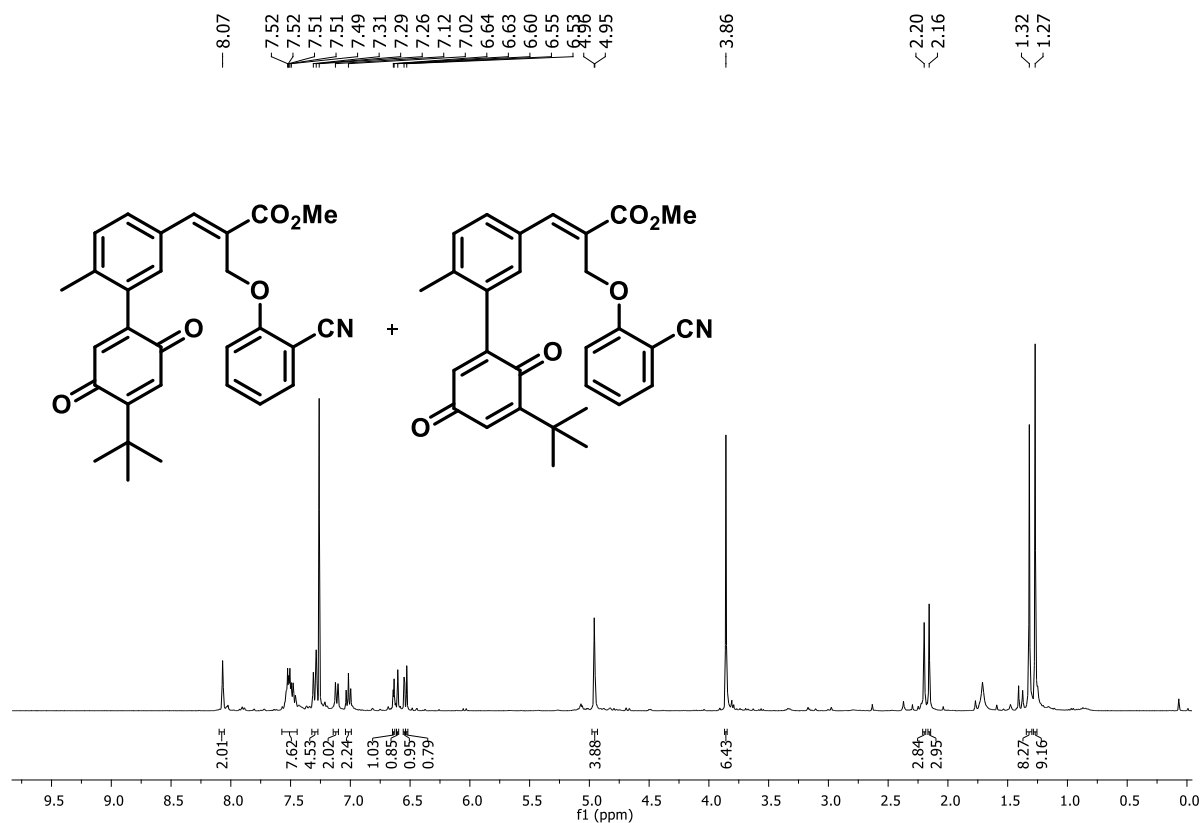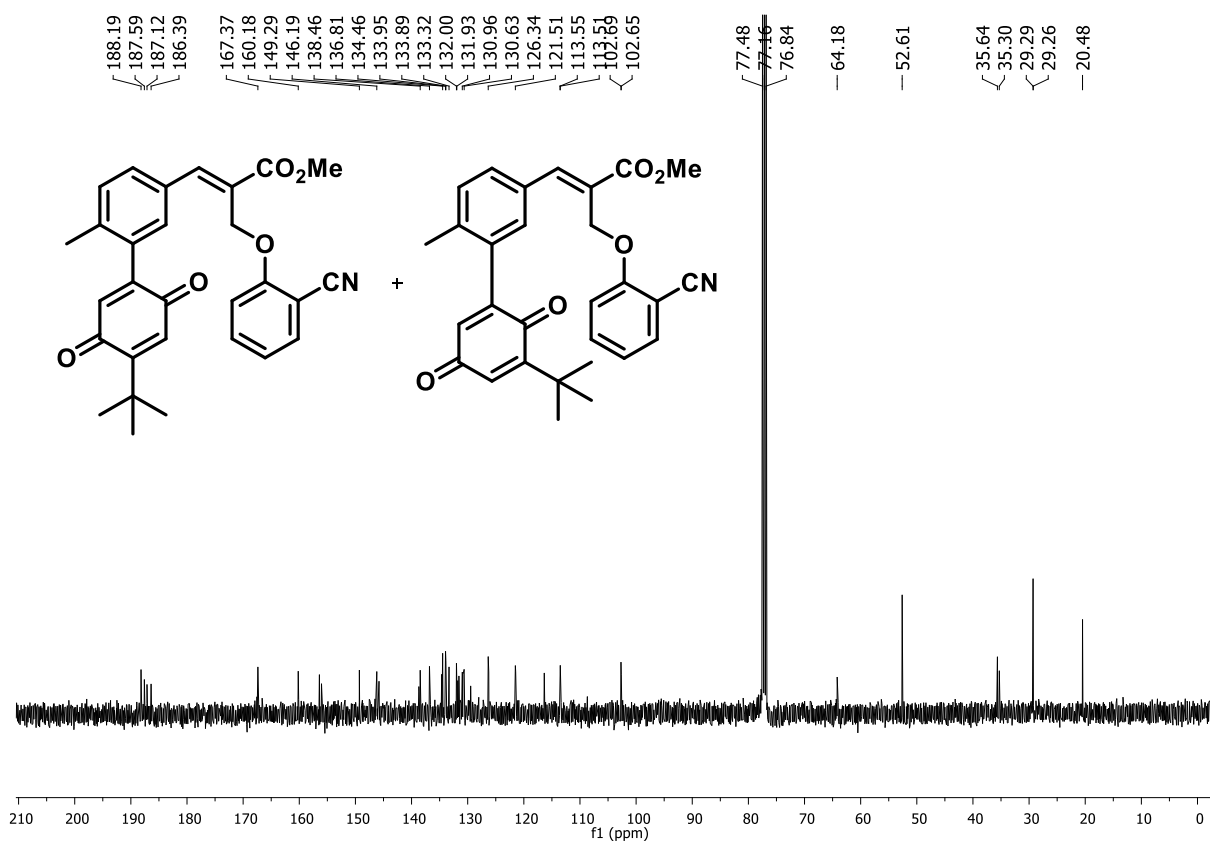

Methyl (*E*)-2-((2-cyanophenoxy)methyl)-3-(3-(1-methyl-2,5-dioxo-2,5-dihydro-1H-pyrrol-3-yl)phenyl)acrylate (12a)

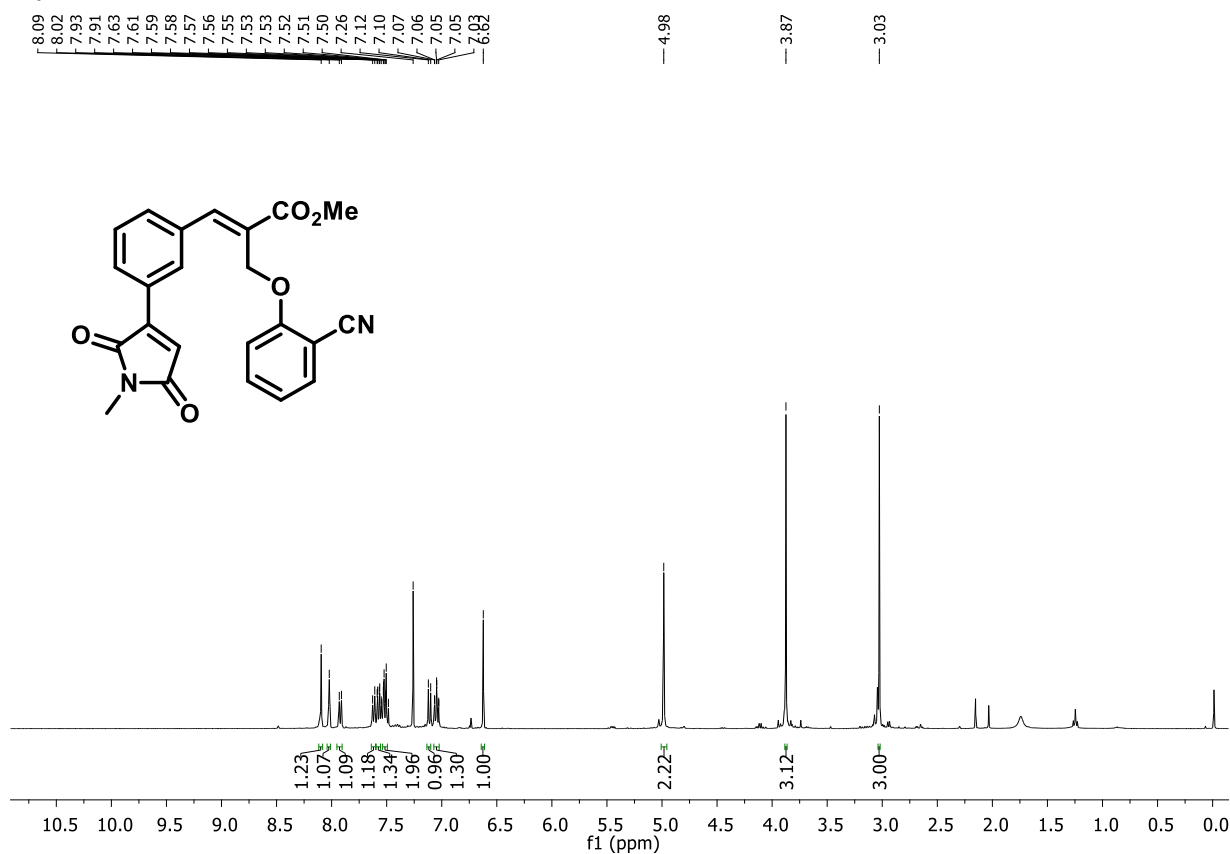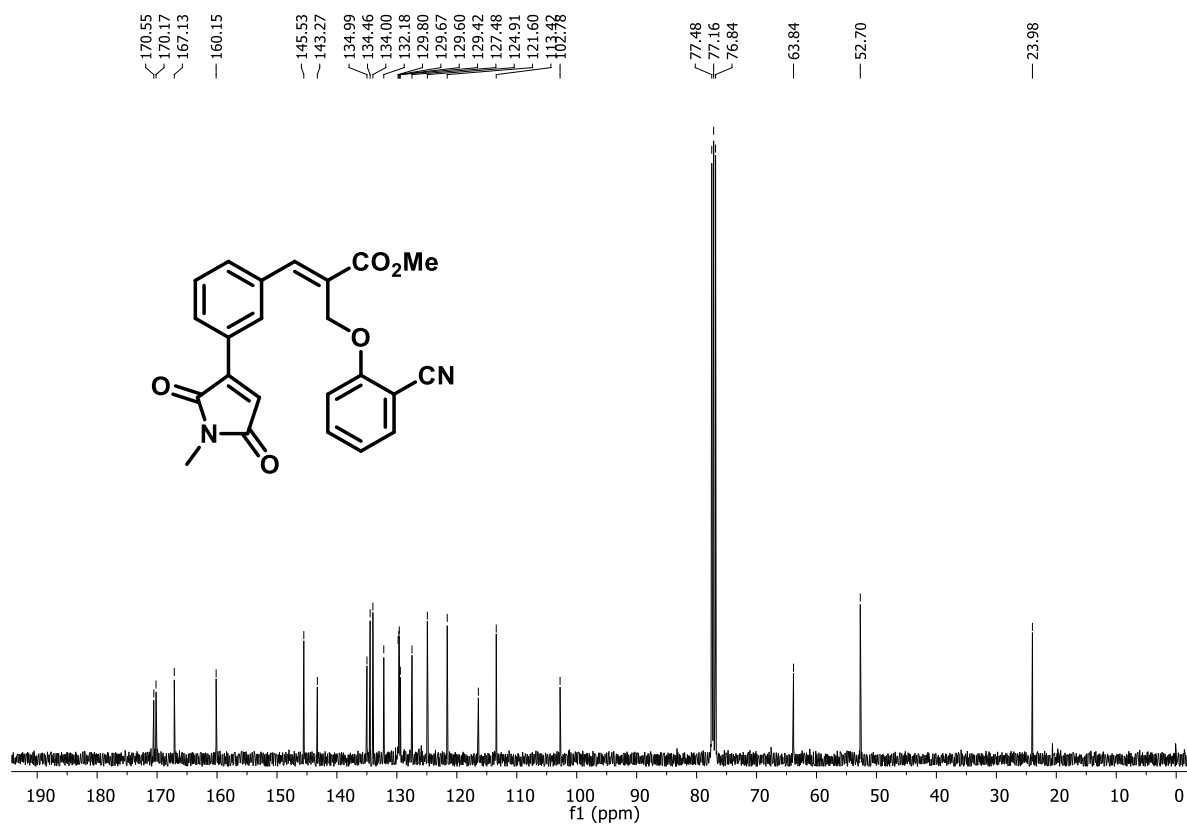

**Methyl (E)-2-((2-cyanophenoxy)methyl)-3-(3-(1-ethyl-2,5-dioxo-2,5-dihydro-1H-pyrrol-3-yl)phenyl)acrylate (12b)**

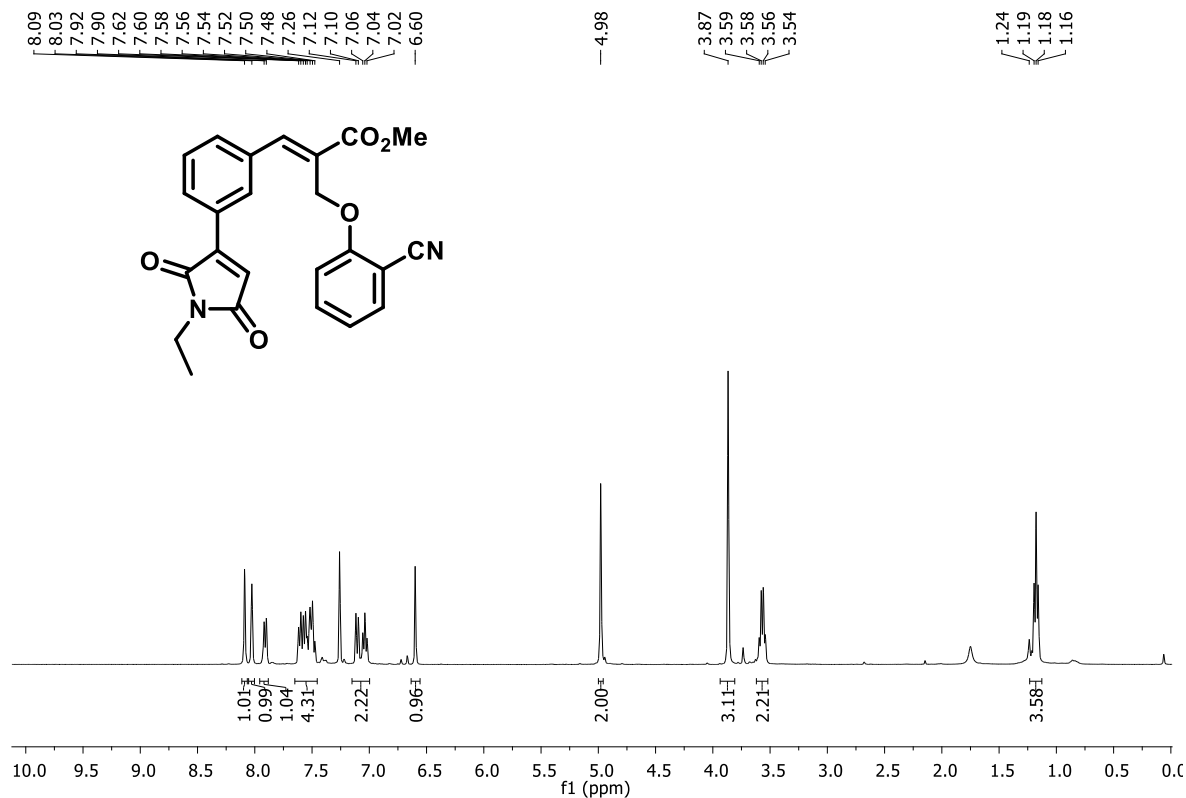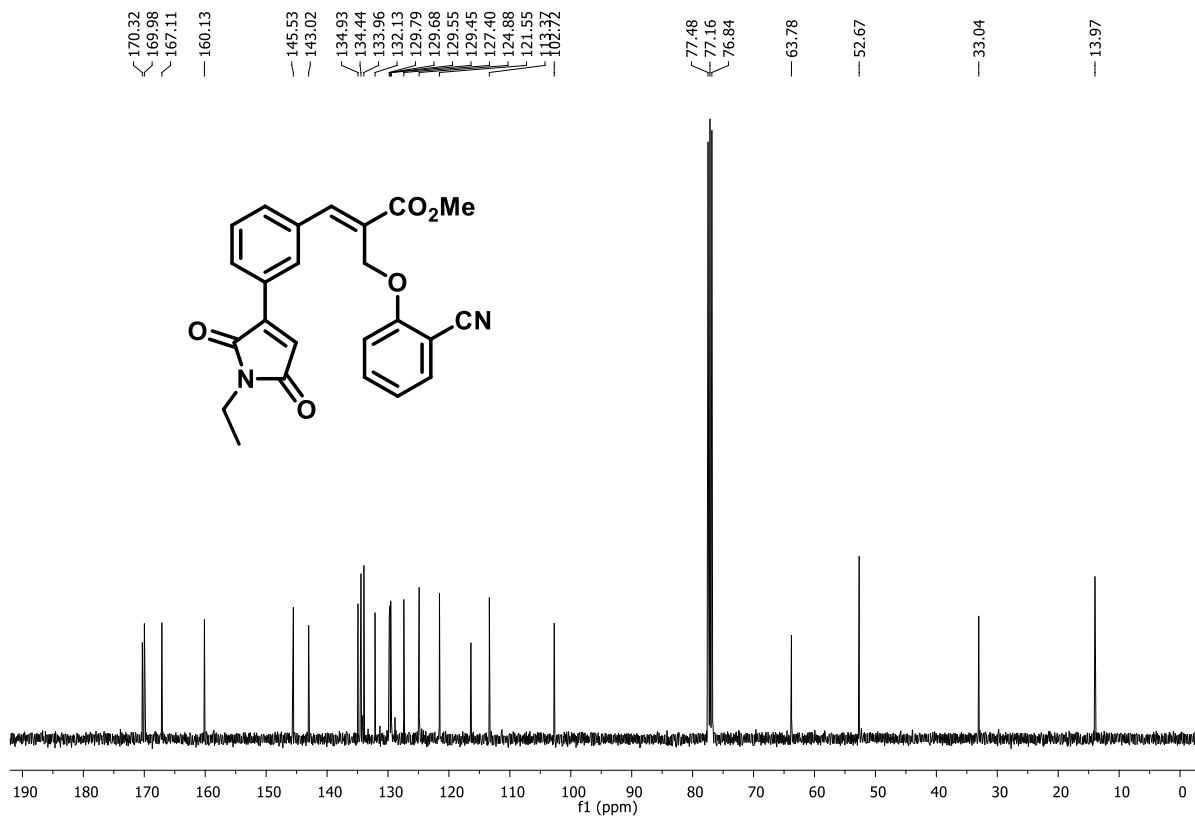



Methyl *(E)*-2-((2-cyanophenoxy)methyl)-3-(3-(2,5-dioxo-1-phenyl-2,5-dihydro-1H-pyrrol-3-yl)phenyl)acrylate (12c)

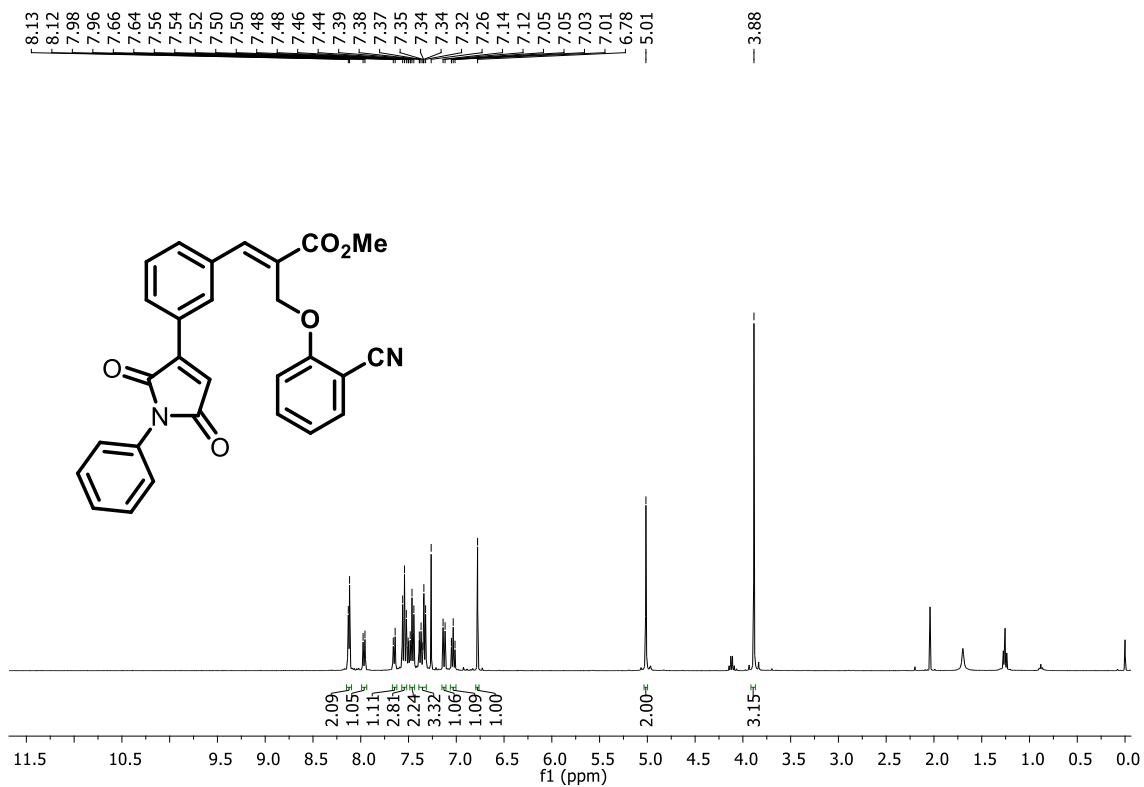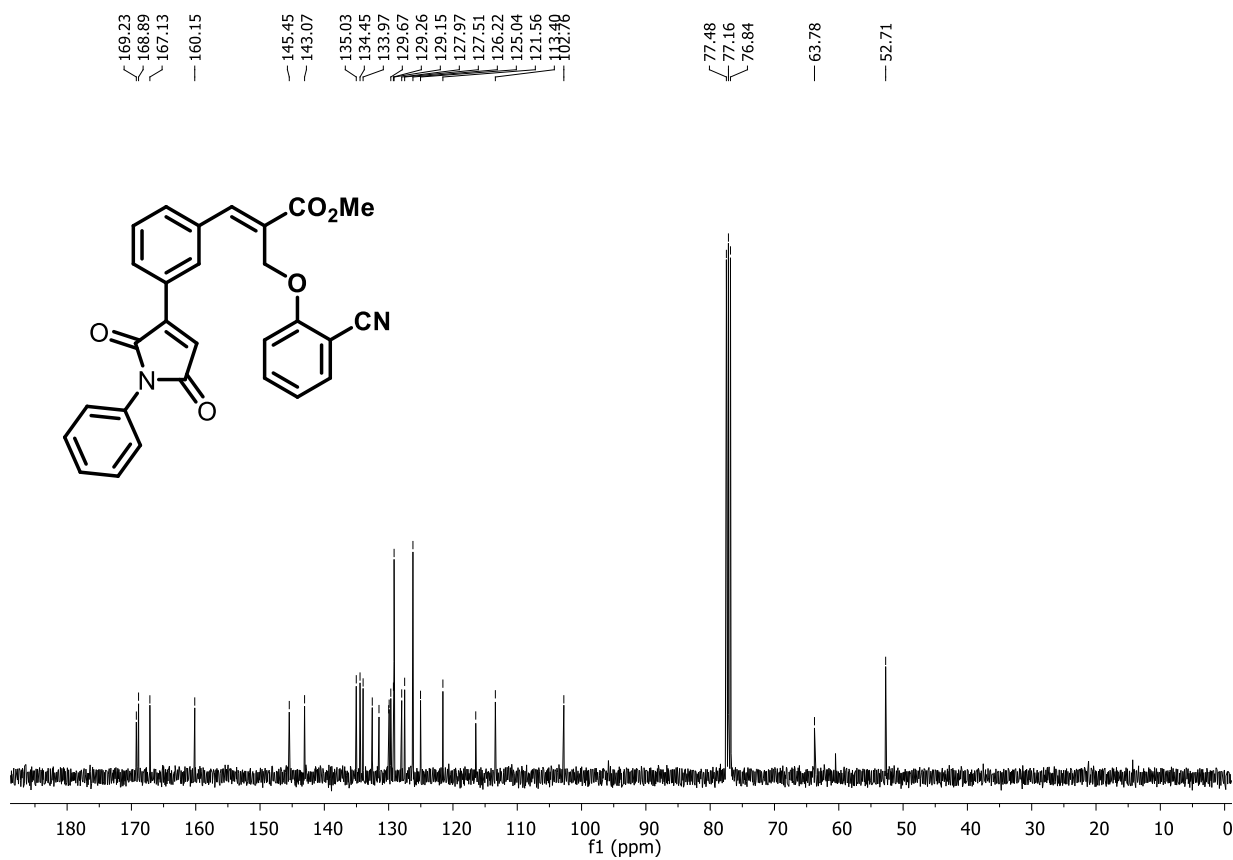

Methyl

(*E*)-3-(3-(1-benzyl-2,5-dioxo-2,5-dihydro-1H-pyrrol-3-yl)phenyl)-2-((2-cyanophenoxy)methyl)acrylate (12d)

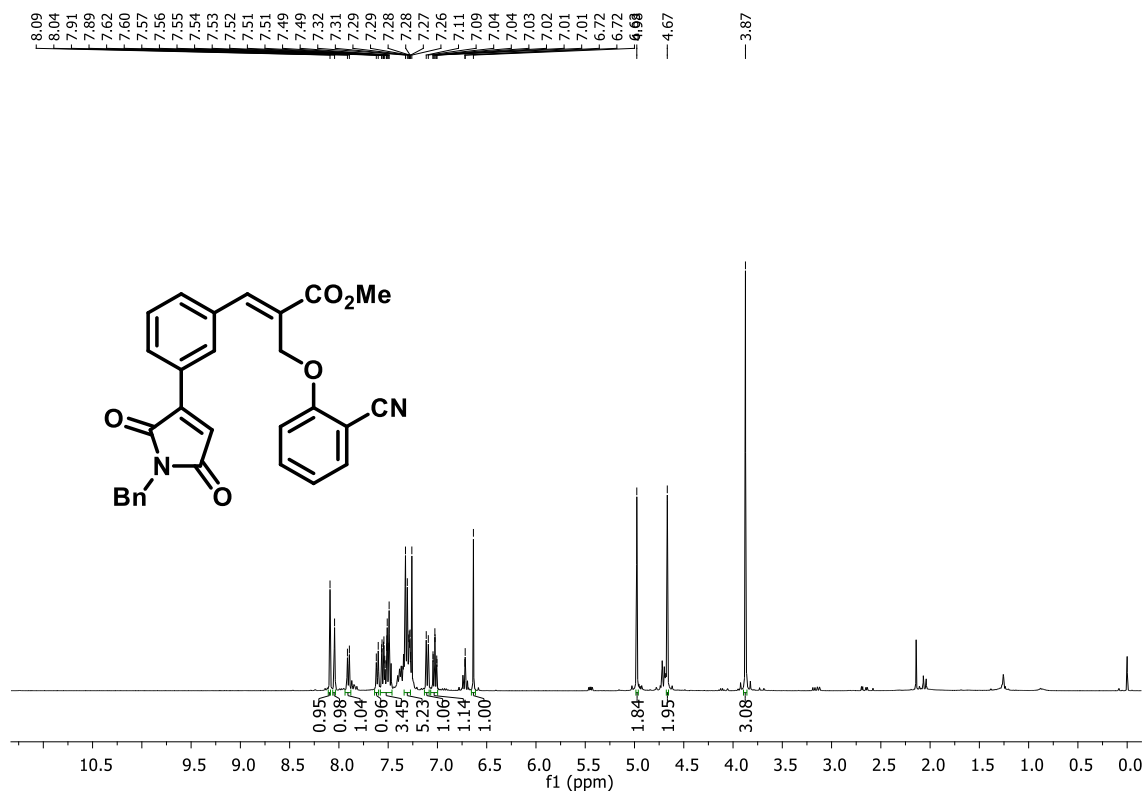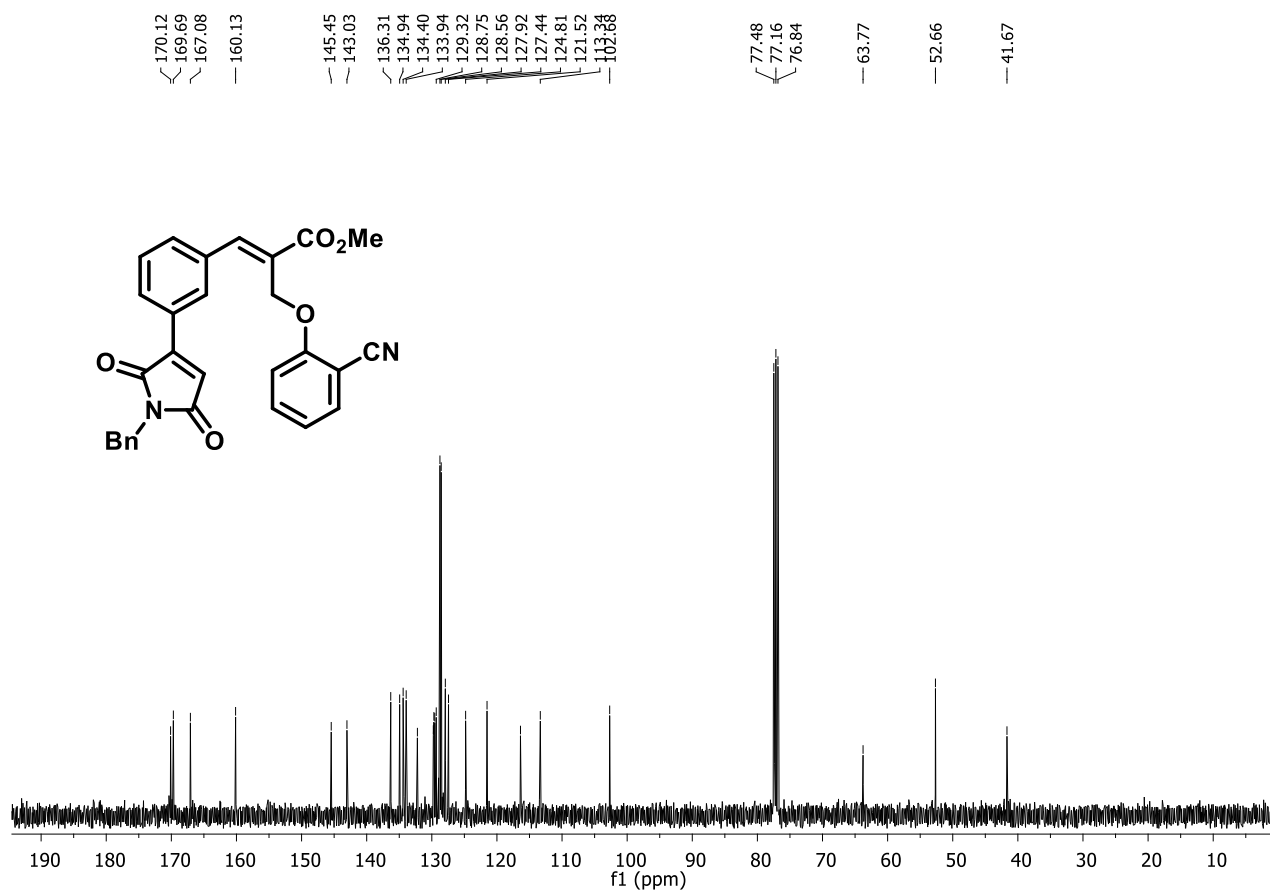

Methyl (E)-2-((2-cyanophenoxy)methyl)-3-(3-(2,5-dioxo-1-phenethyl-2,5-dihydro-1H-pyrrol-3-yl)phenyl)acrylate (12e)

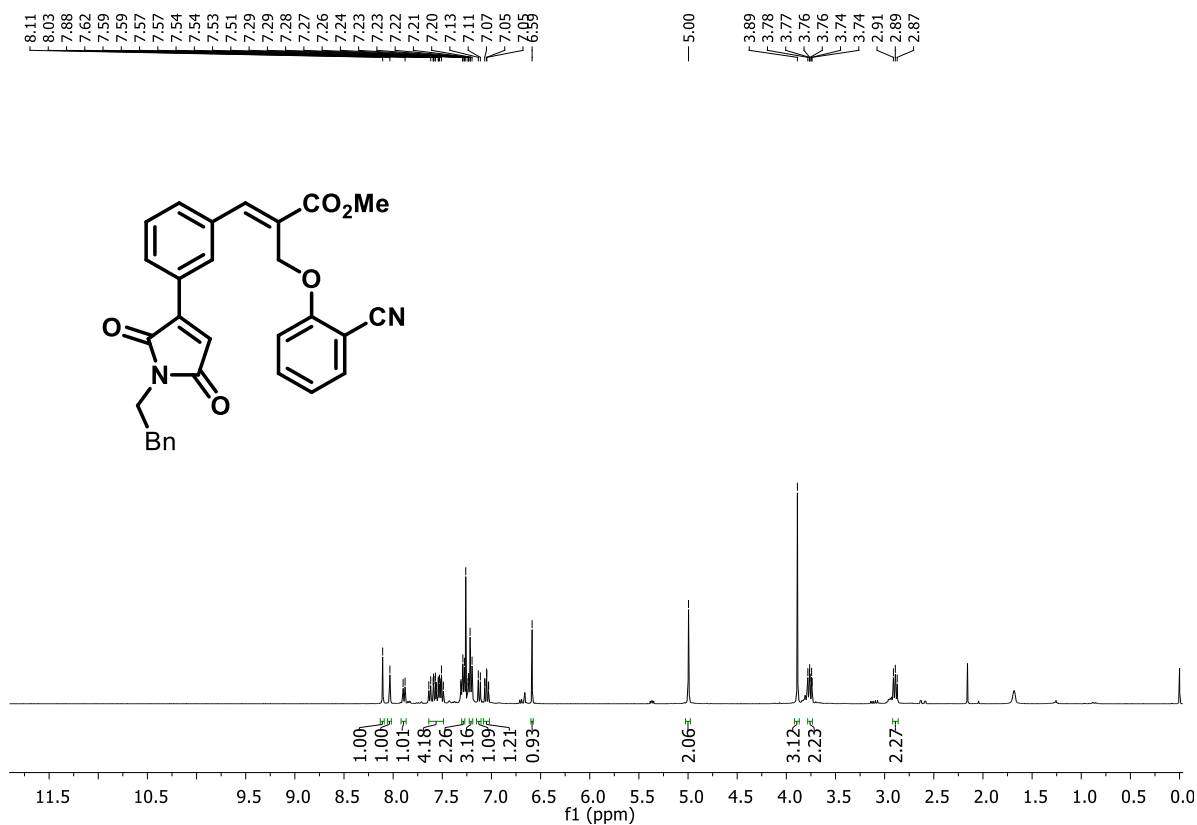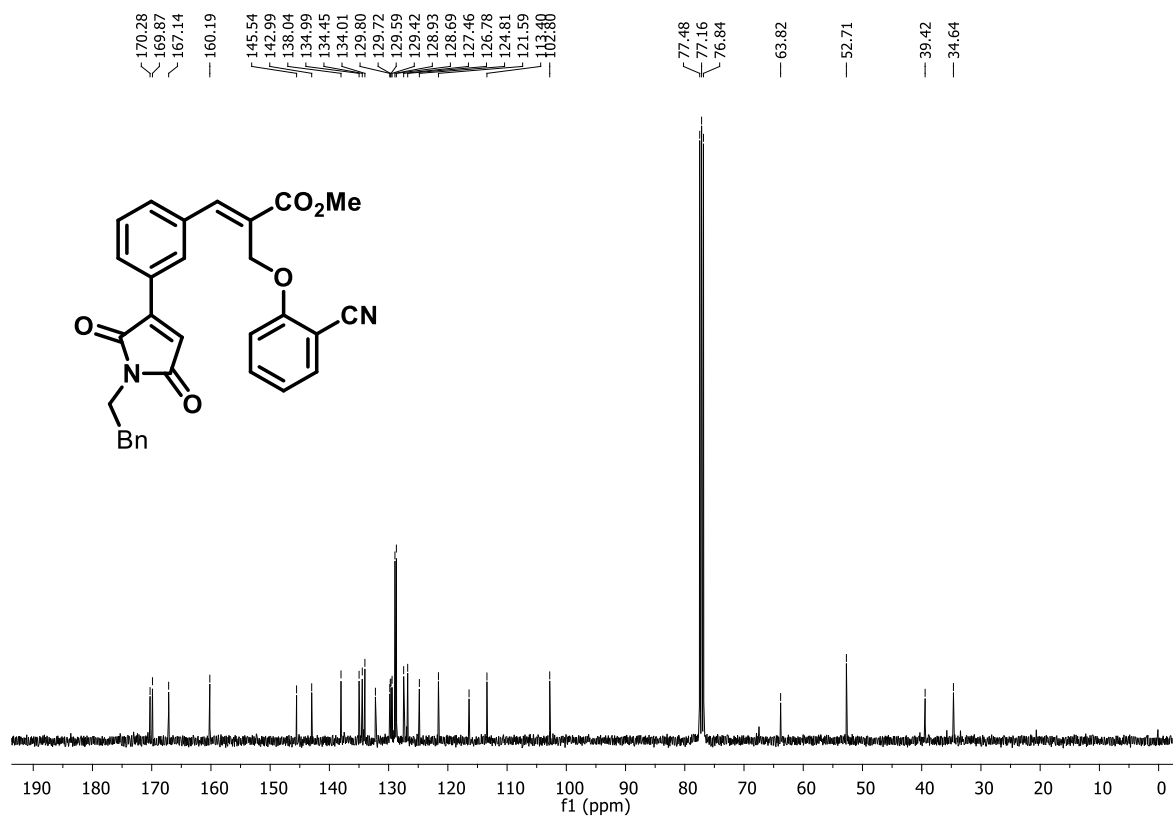

**Methyl (E)-2-((2-cyanophenoxy)methyl)-3-(3-(1-(3,4-dimethoxyphenethyl)-2,5-dioxo-2,5-dihydro-1H-pyrrol-3-yl) phenyl) acrylate (12f)**

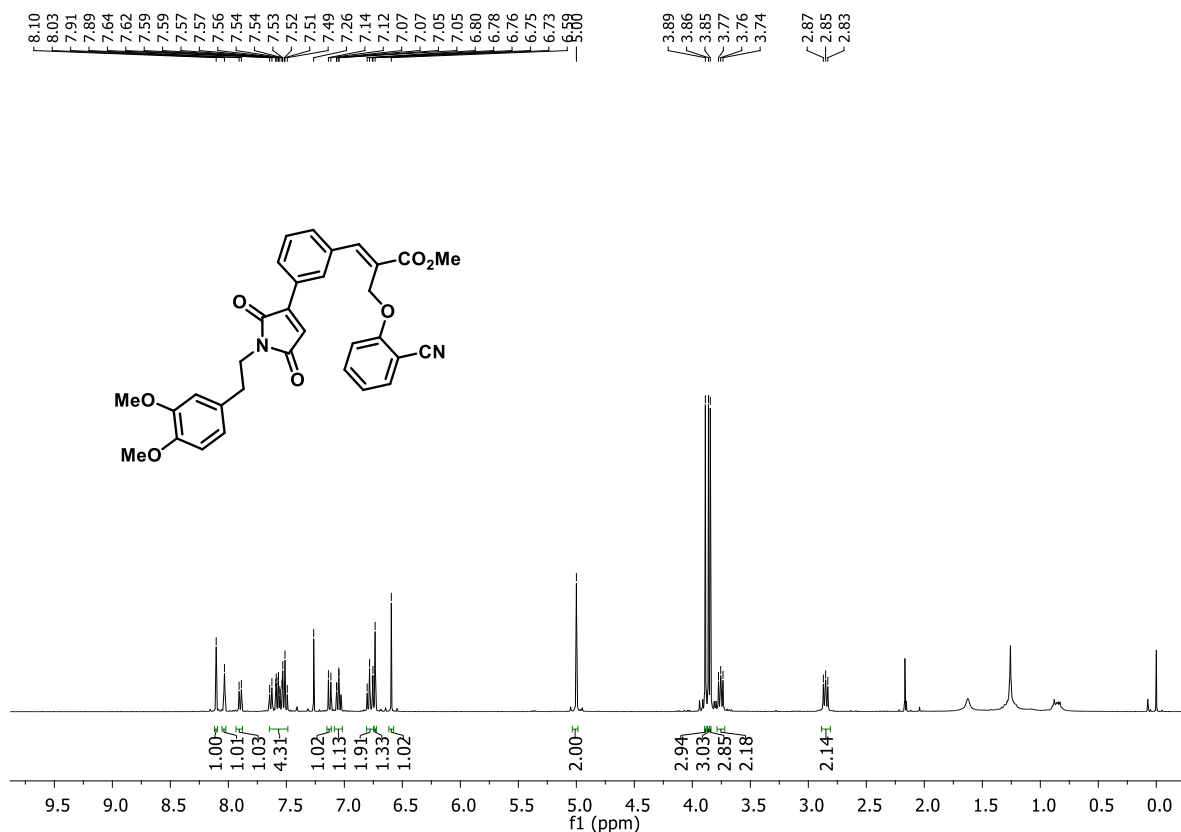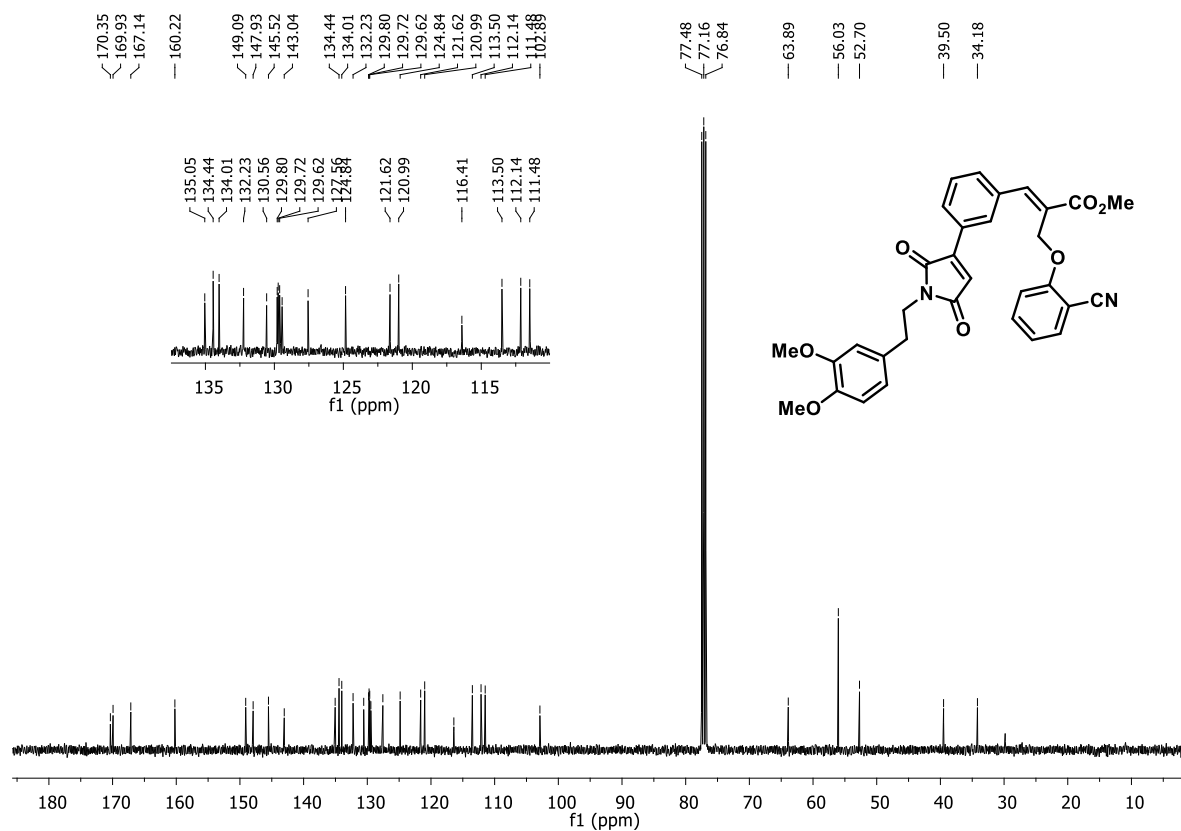

Methyl (E)-2-((2-cyanophenoxy)methyl)-3-(3-(2,5-dioxo-1-(o-tolyl)-2,5-dihydro-1H-pyrrol-3-yl)phenyl)acrylate (12g)

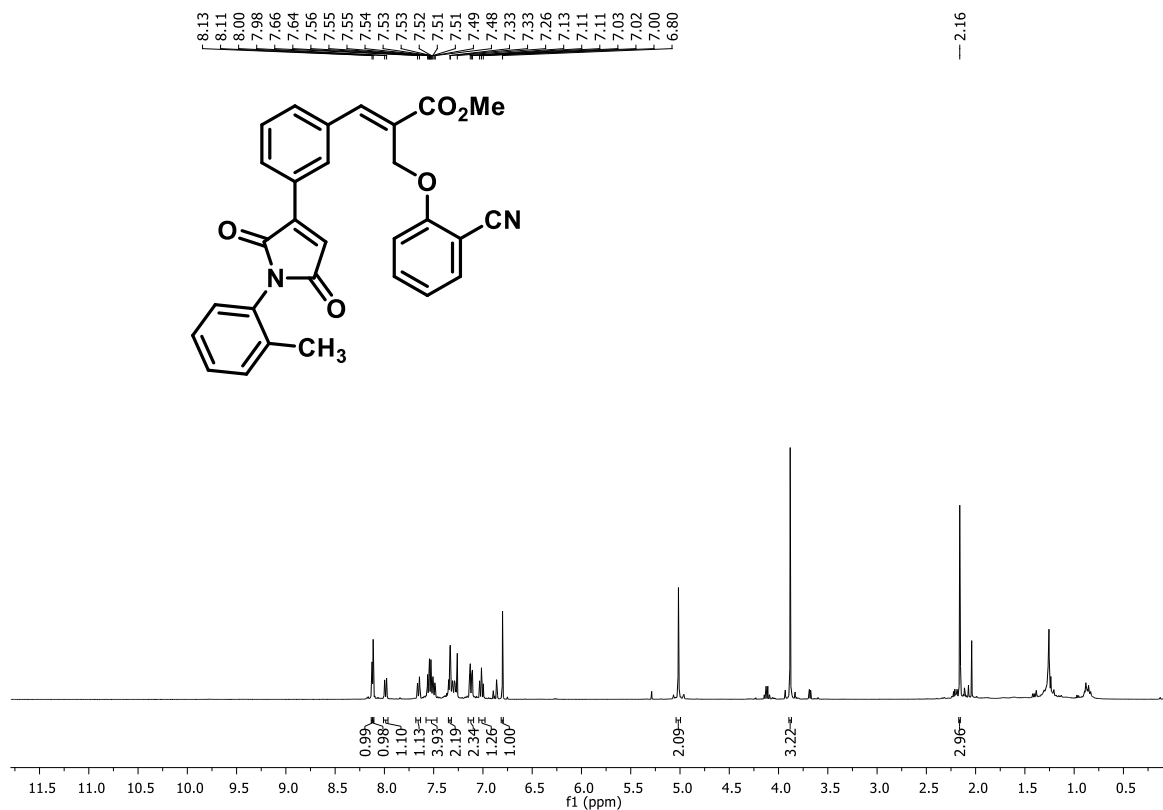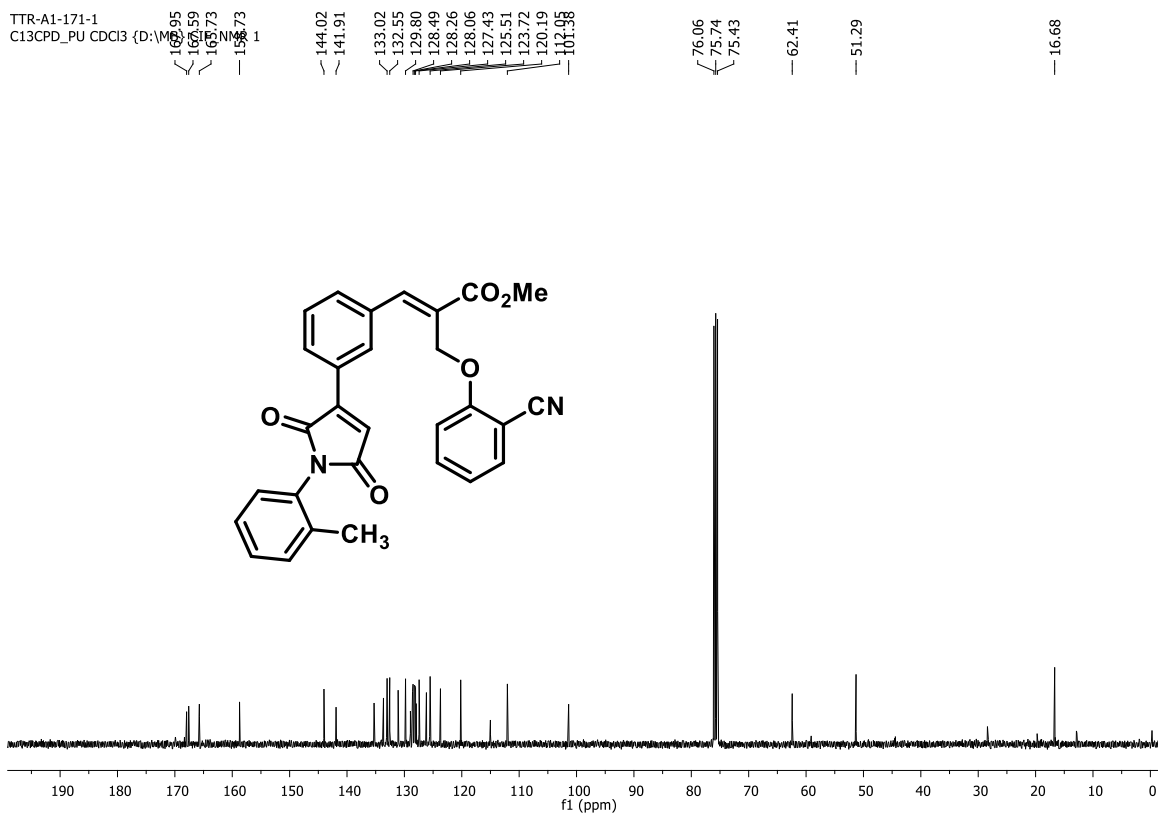

**Methyl (E)-2-((2-cyanophenoxy)methyl)-3-(3-(1-(2,4-dimethylphenyl)-2,5-dioxo-2,5-dihydro-1H-pyrrol-3-yl)phenyl)acrylate (12h)**

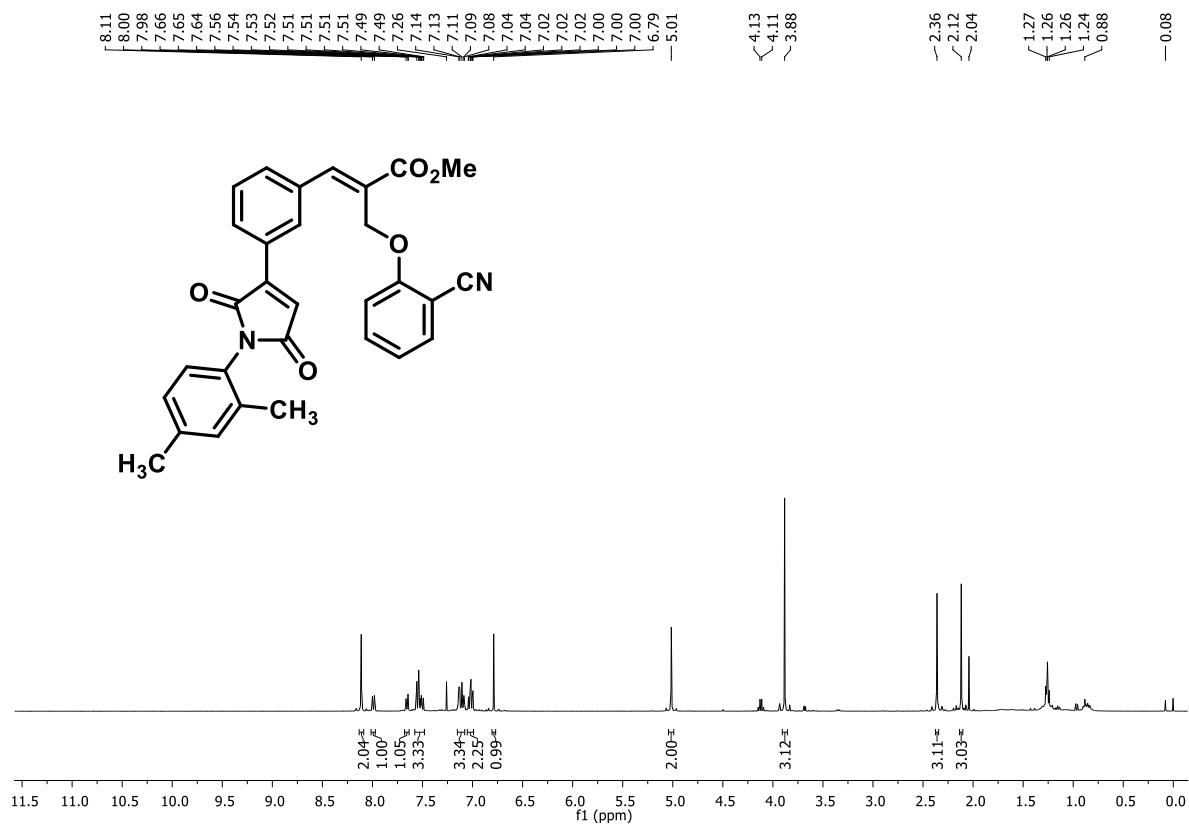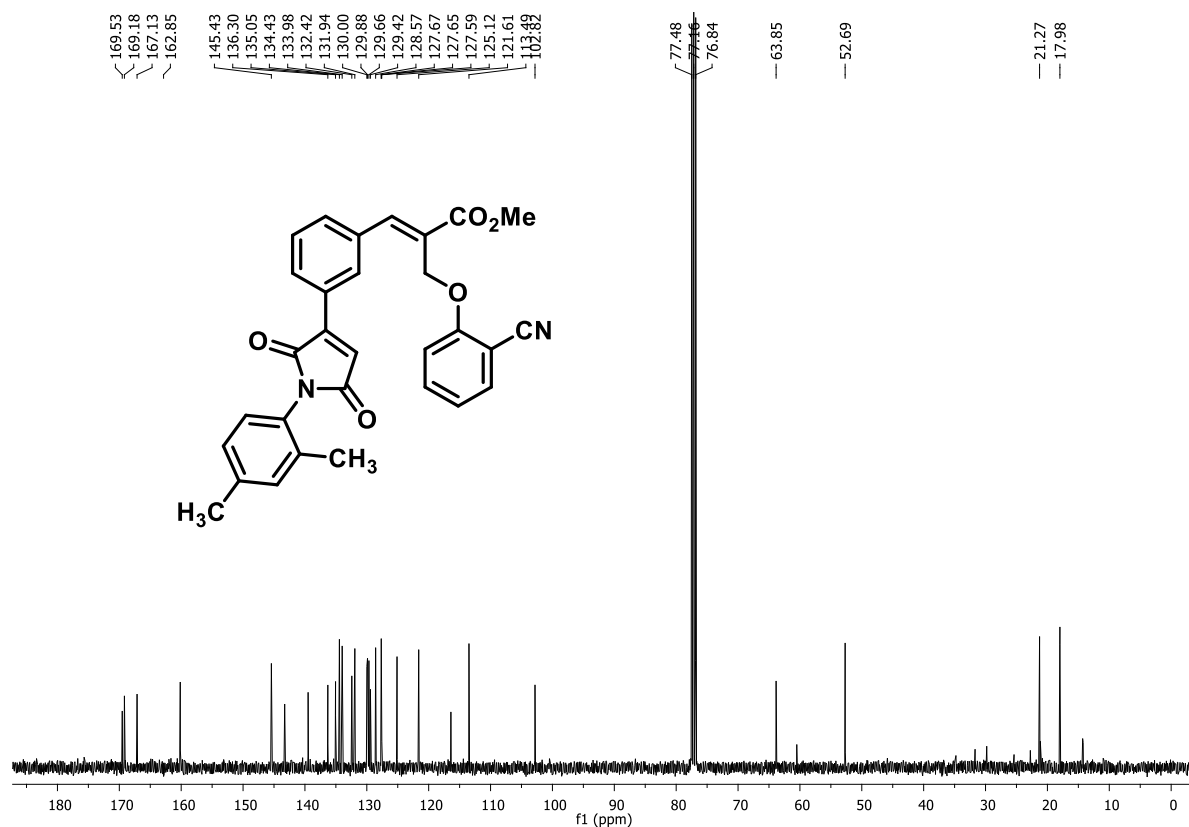

Methyl

(*E*)-3-(3-(1-(4-chlorophenyl)-2,5-dioxo-2,5-dihydro-1H-pyrrol-3-yl)phenyl)-2-((2-cyanophenoxy)methyl)acrylate (12i)

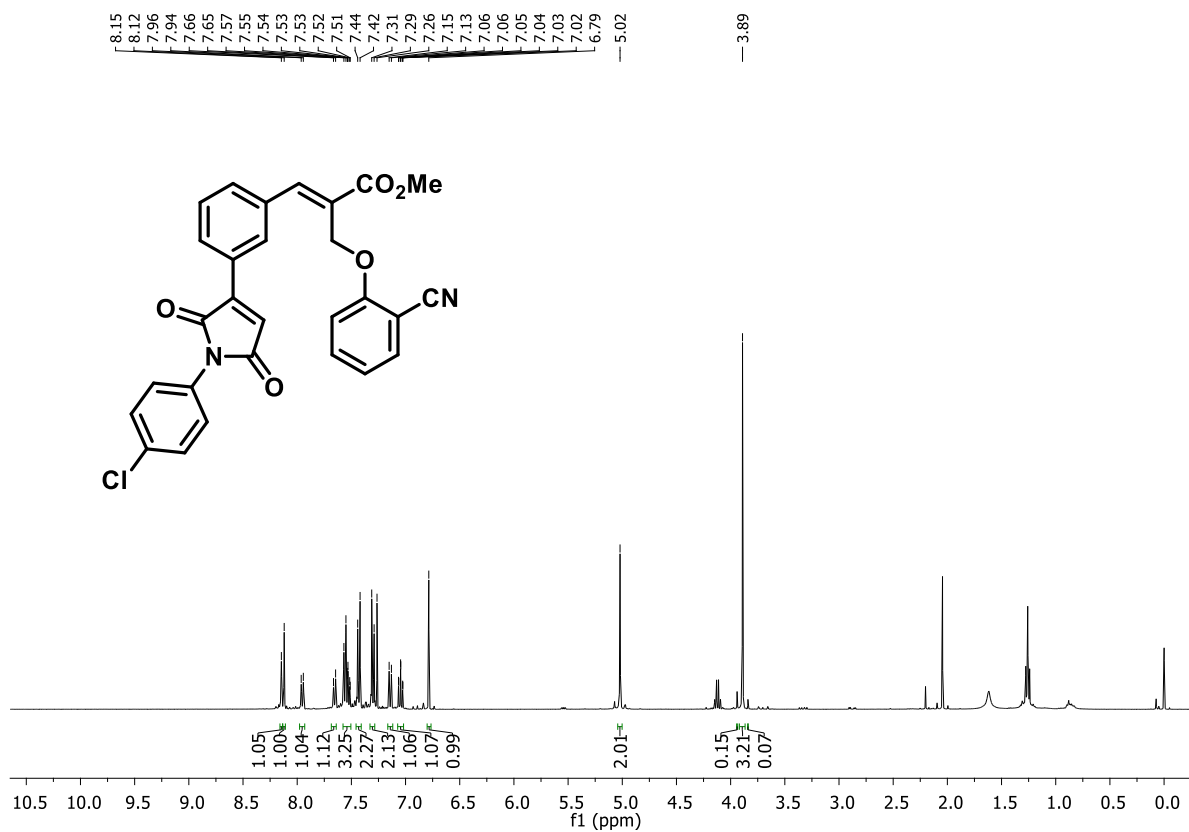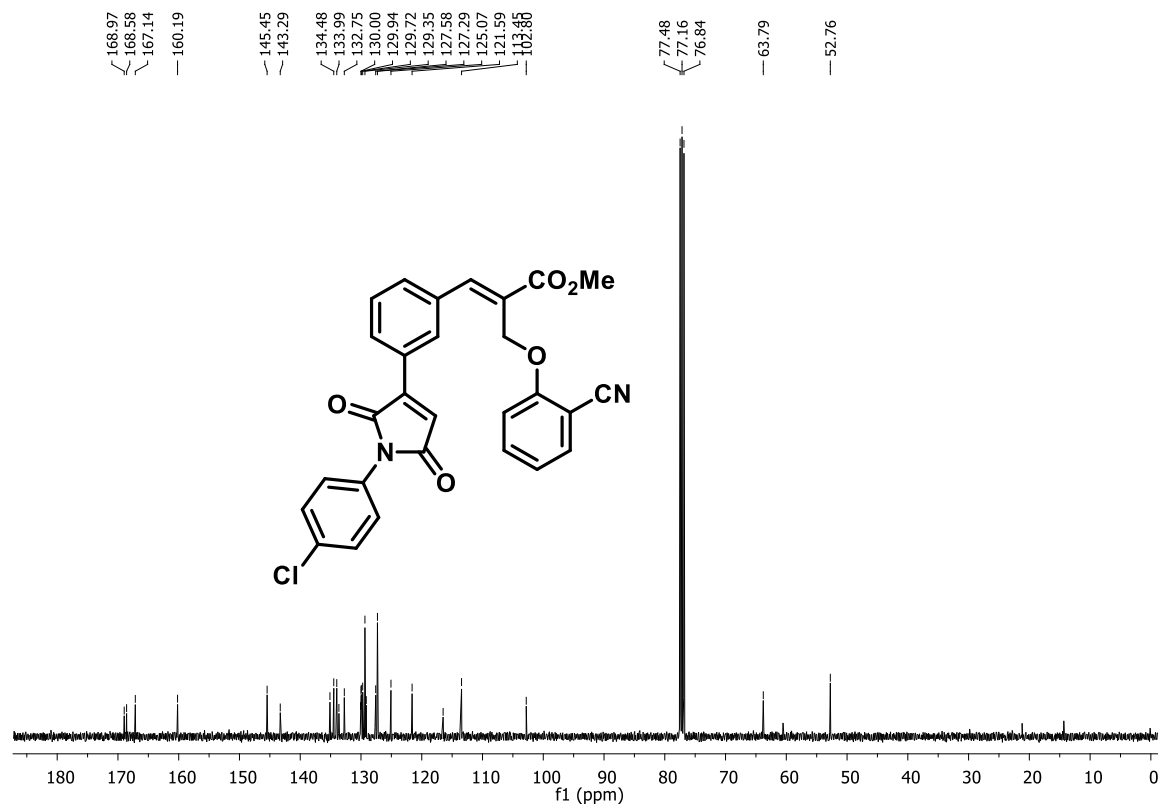

**Methyl (E)-2-((2-cyanophenoxy)methyl)-3-(3-(1-(naphthalen-1-yl)-2,5-dioxo-2,5-dihydro-1H-pyrrol-3-yl)phenyl)acrylate (12j)**

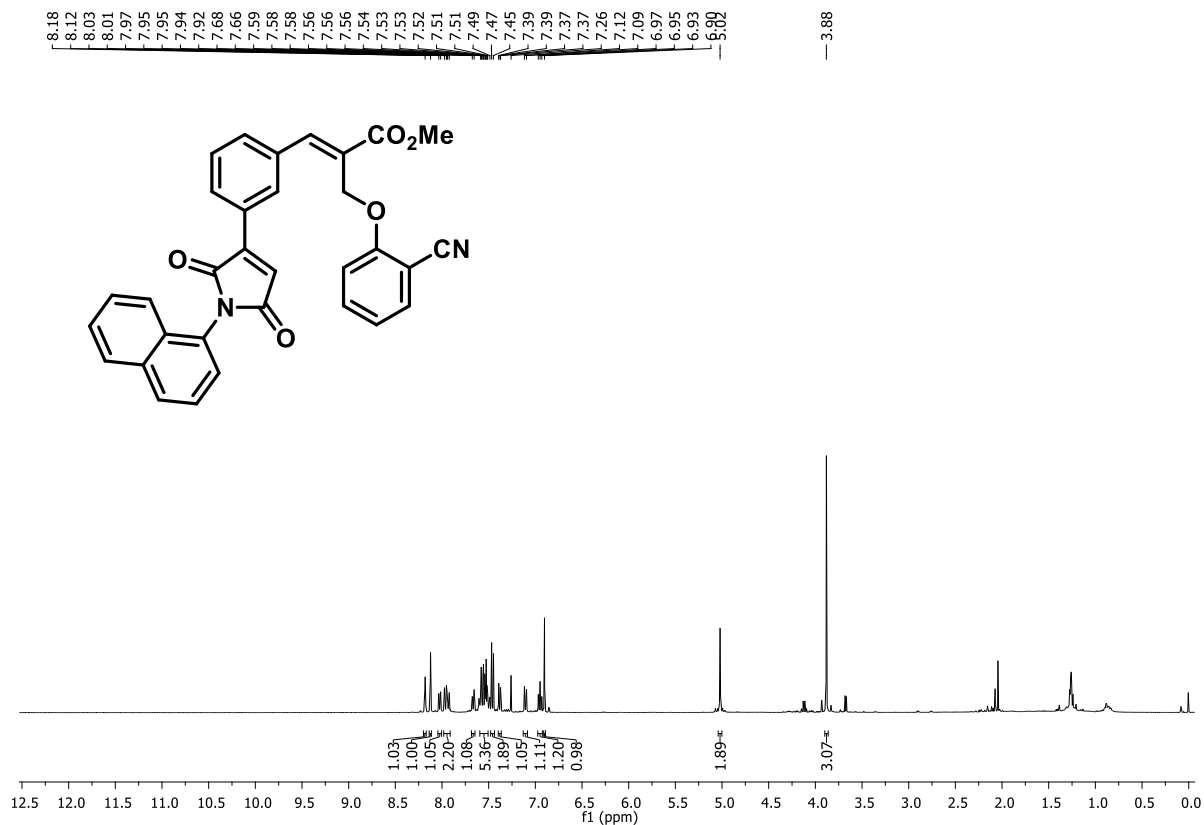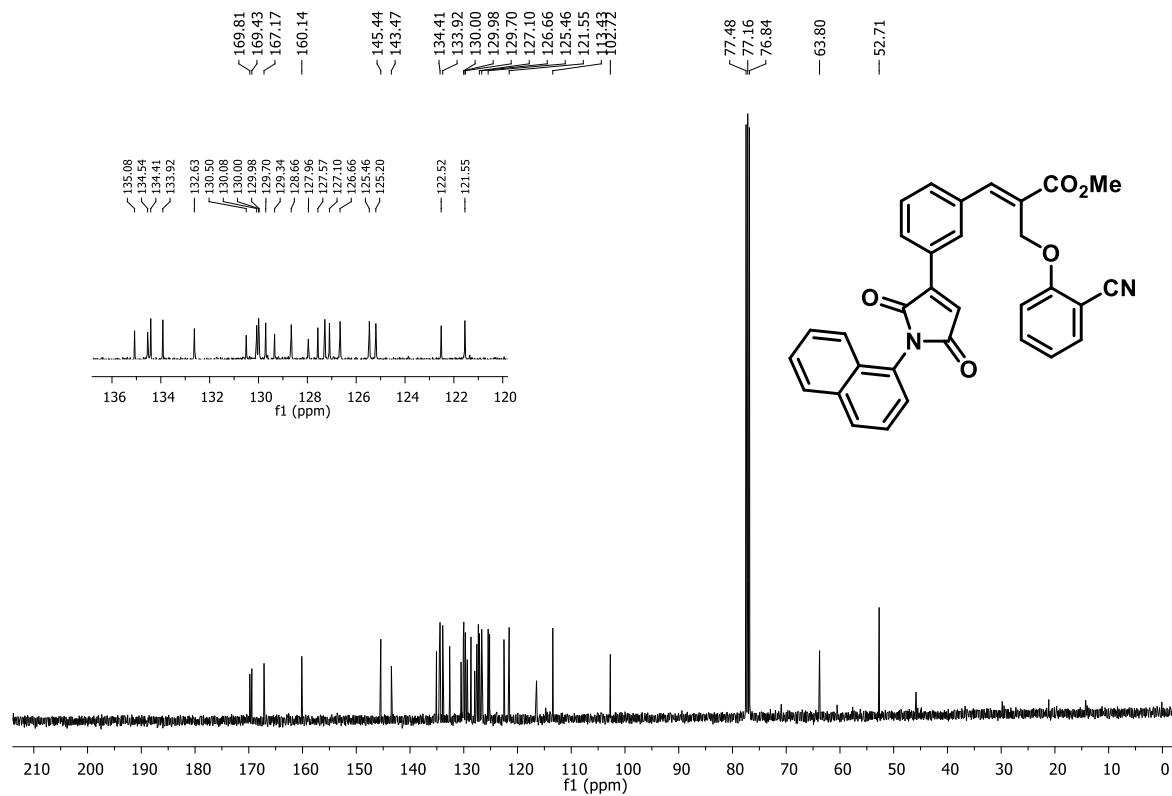



Ethyl (E)-2-((2-cyanophenoxy)methyl)-3-(3-(1-methyl-2,5-dioxo-2,5-dihydro-1H-pyrrol-3-yl)phenyl)acrylate (12k)

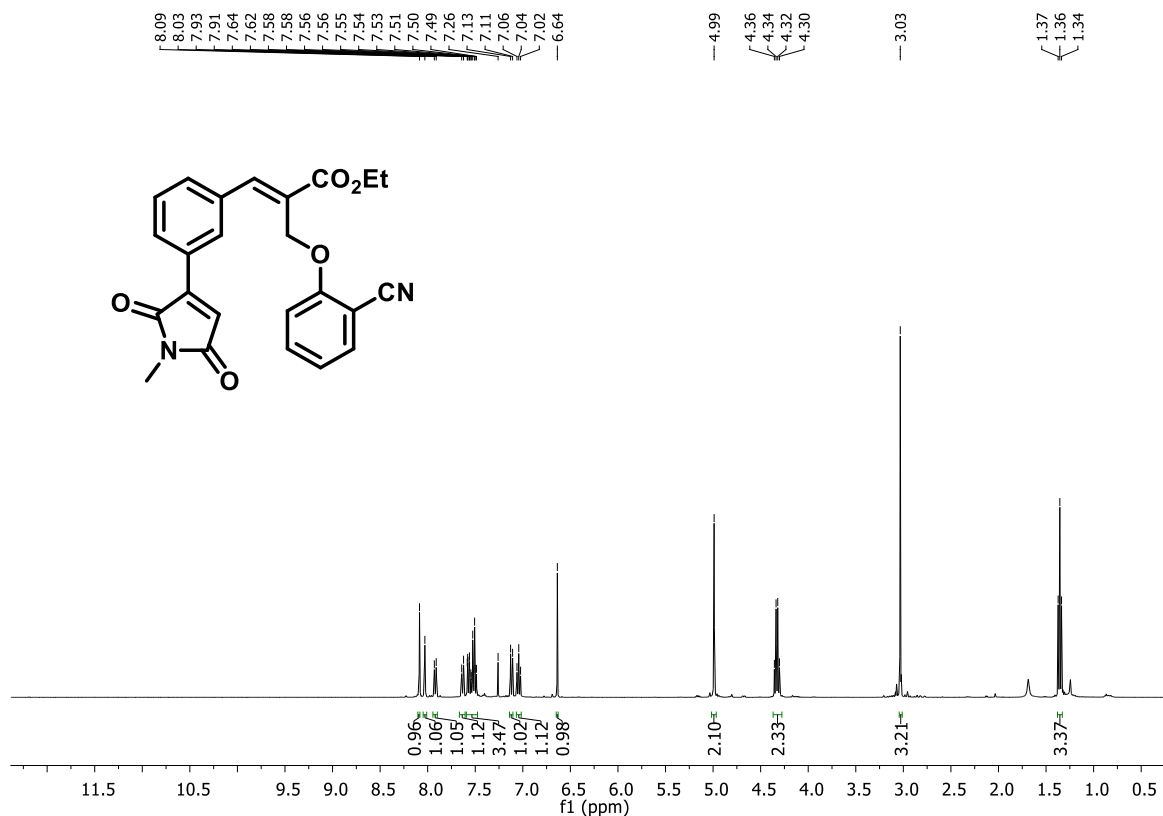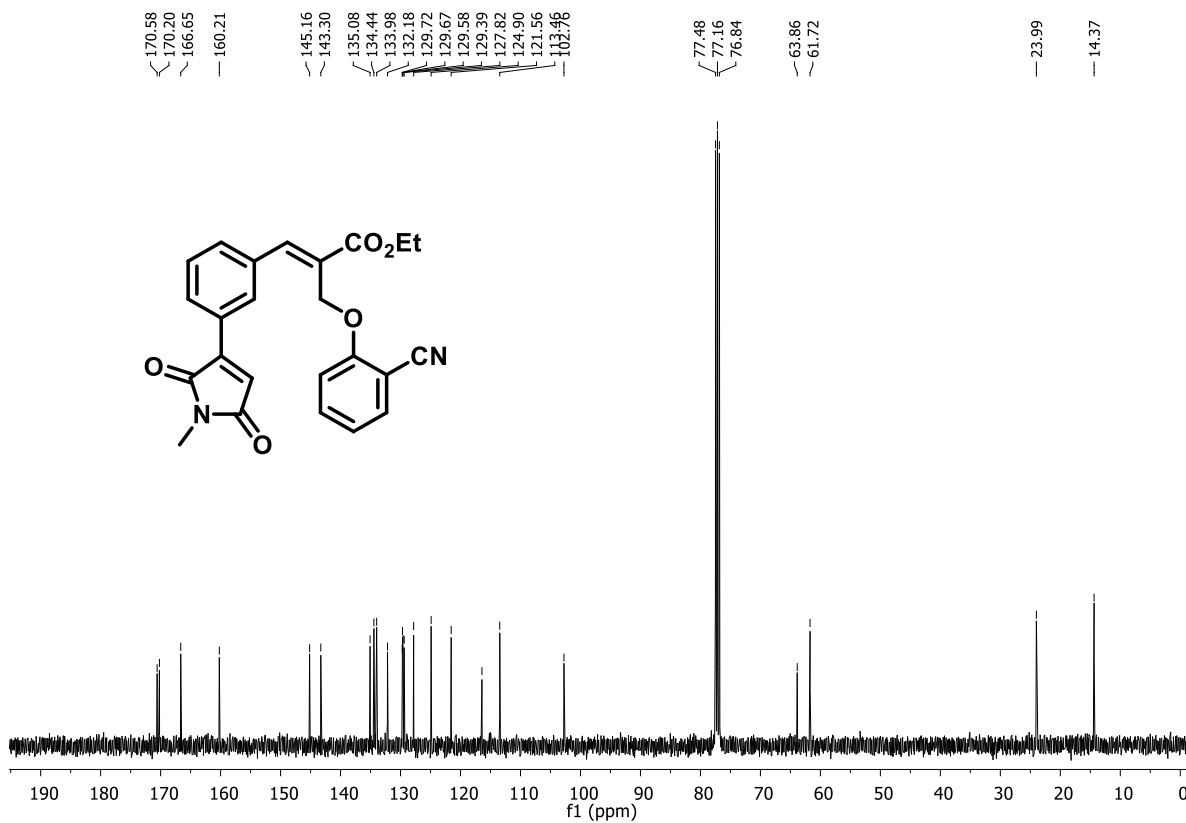

**Methyl (E)-2-((2-cyanophenoxy)methyl)-3-(2-methoxy-5-(1-methyl-2,5-dioxo-2,5-dihydro-1H-pyrrol-3-yl)phenyl)acrylate (12l)**

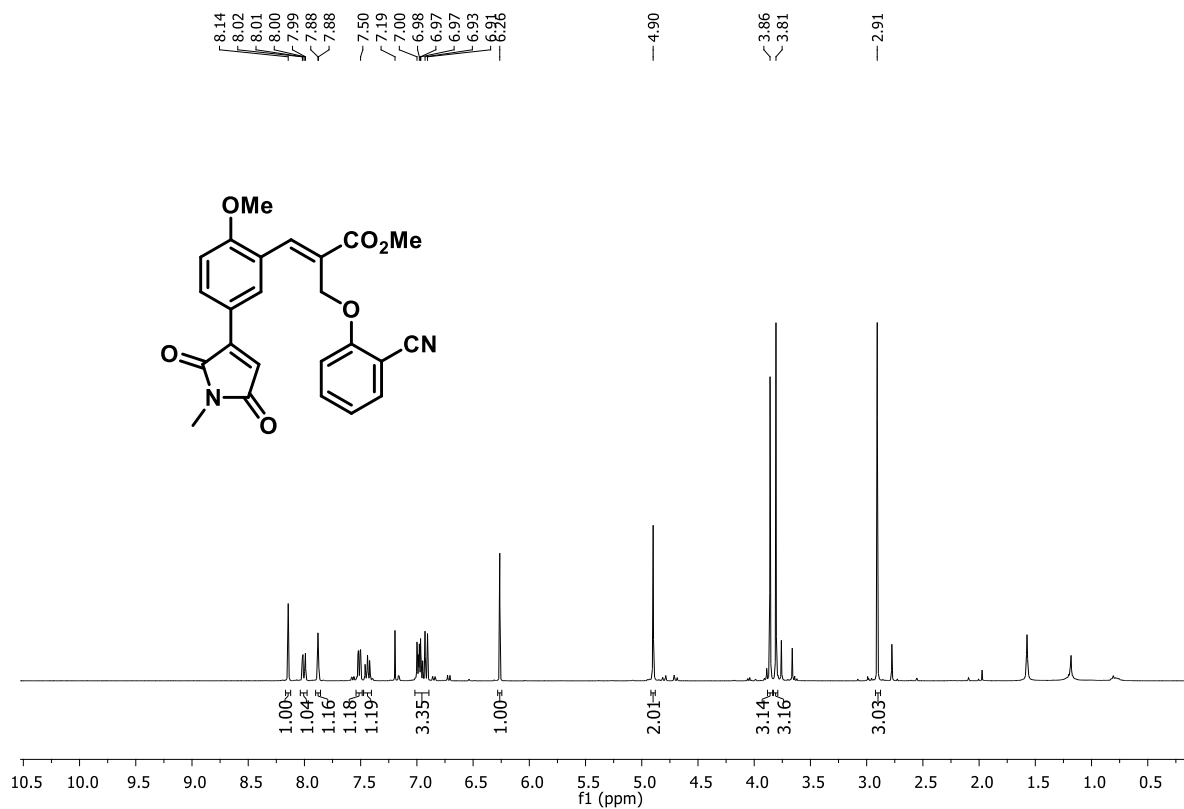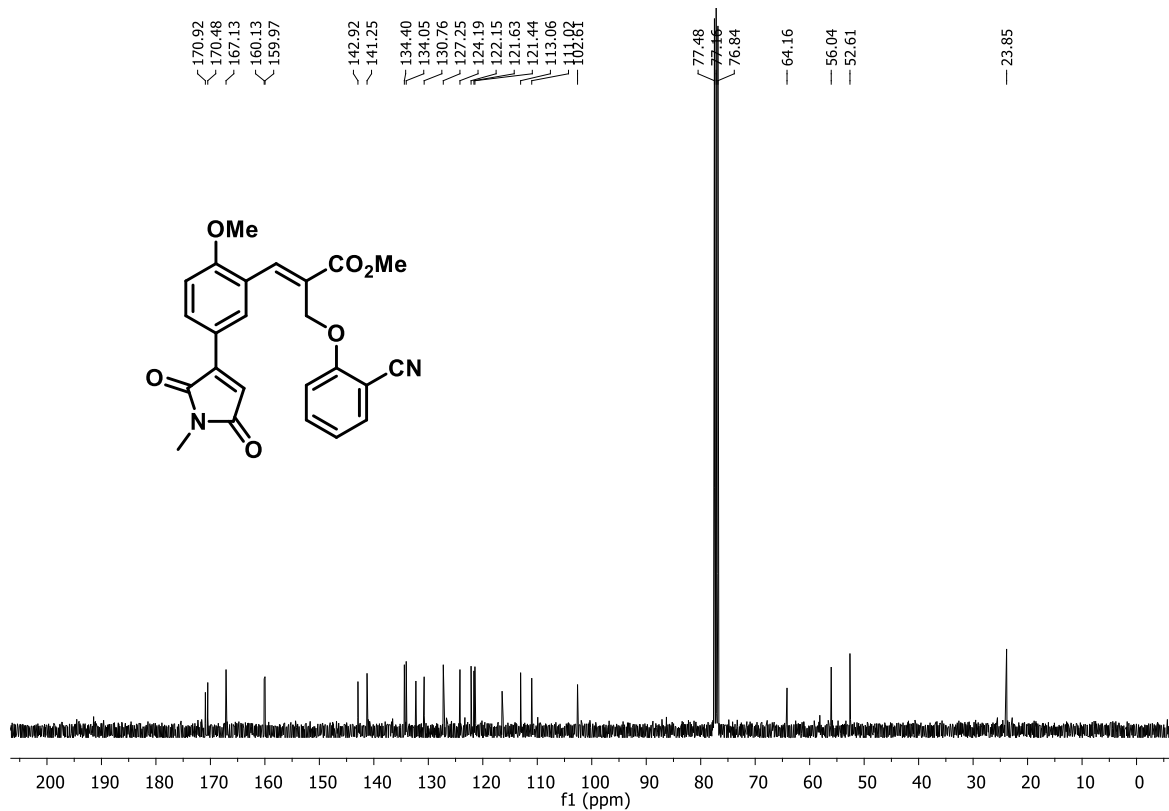

Methyl (E)-3-(5-(1-benzyl-2,5-dioxo-2,5-dihydro-1H-pyrrol-3-yl)-2-bromophenyl)-2-((2-cyanophenoxy)methyl)acrylate (12m)

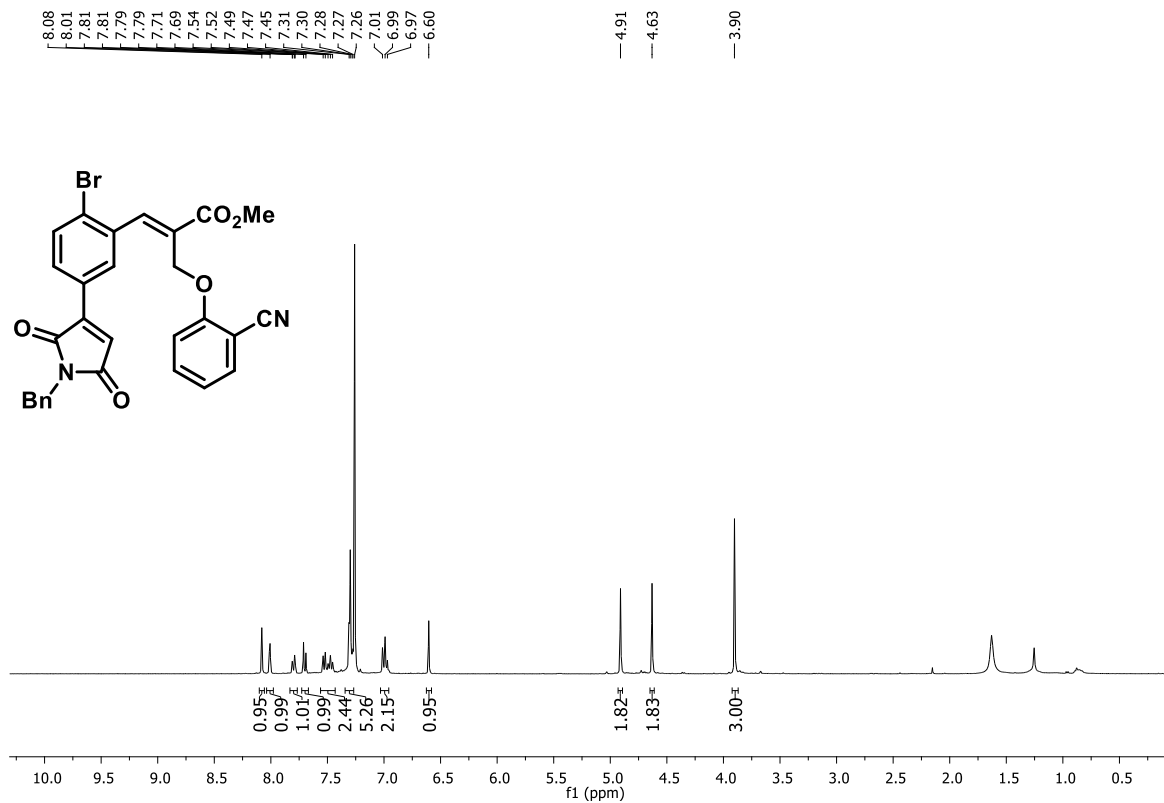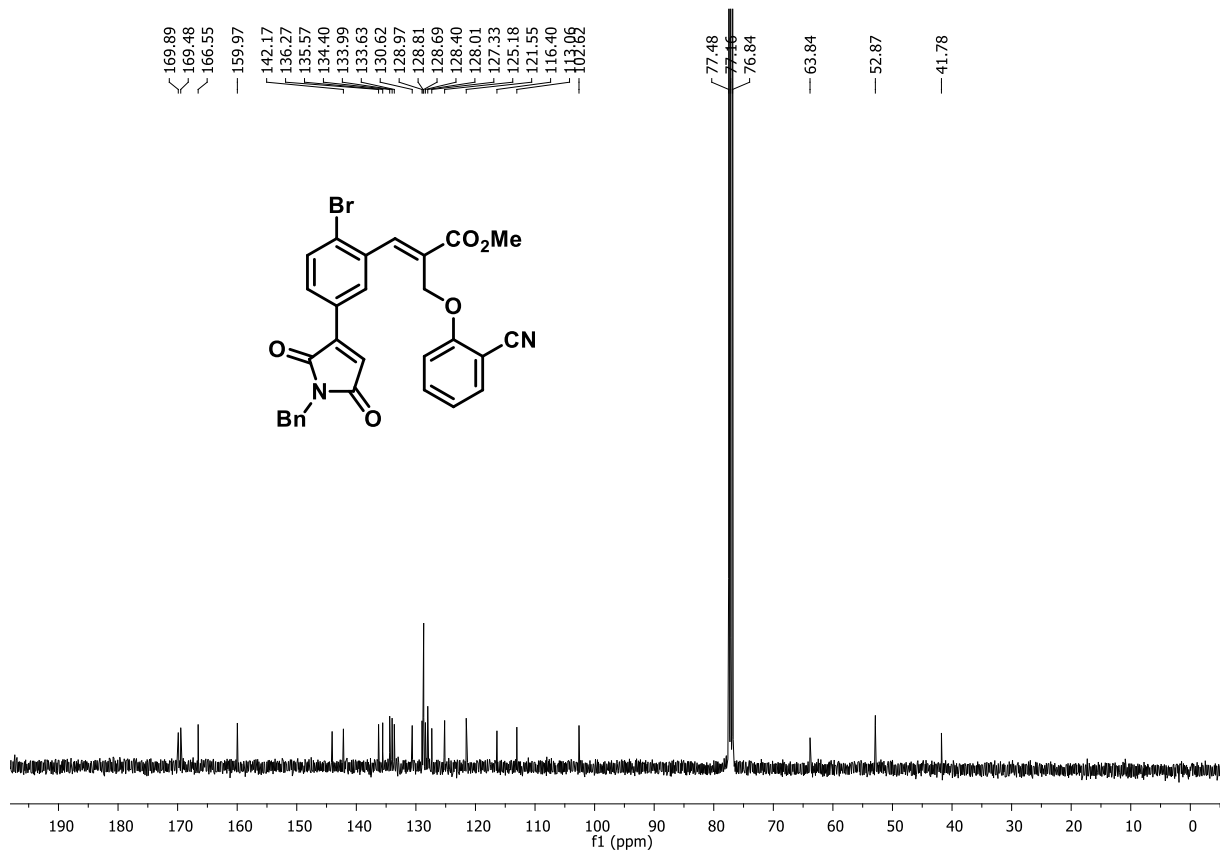

Methyl (*E*)-2-((2-cyanophenoxy)methyl)-3-(4-methyl-3-(1-methyl-2,5-dioxo-2,5-dihydro-1H-pyrrol-3-yl)phenyl)acrylate (12n)

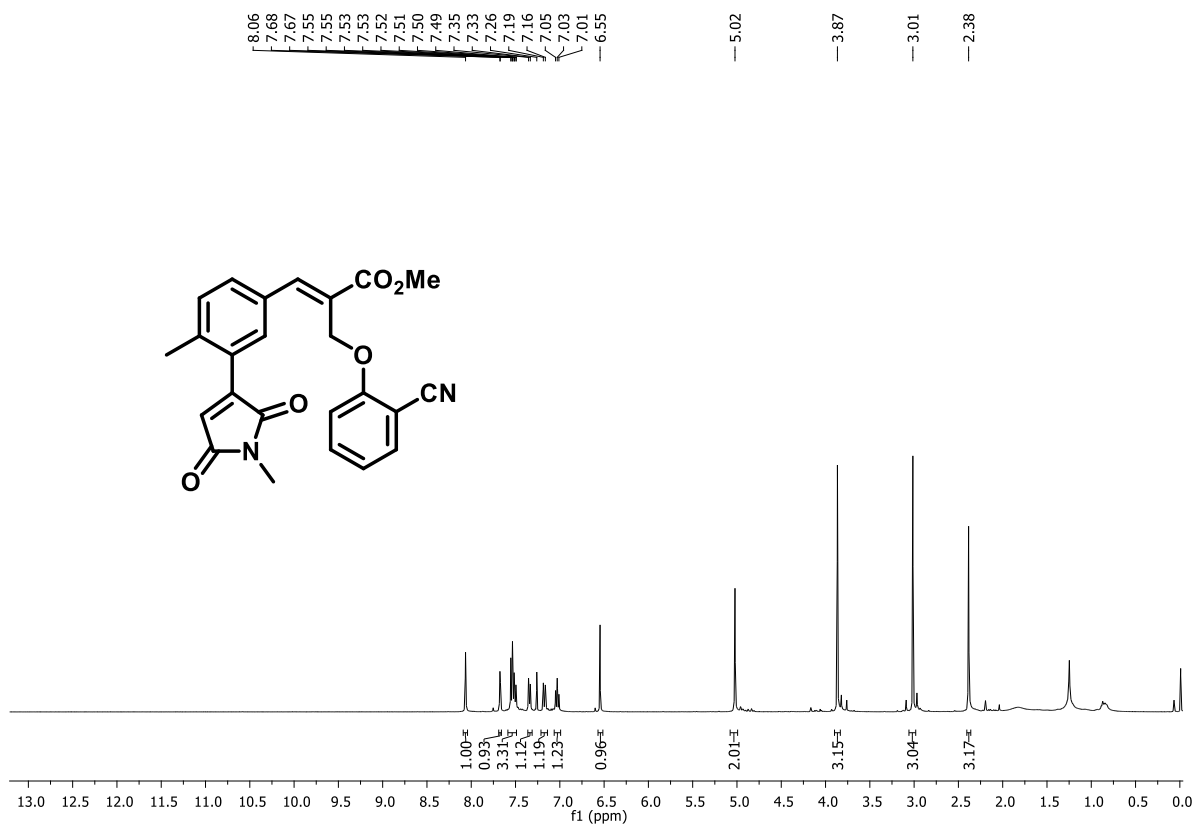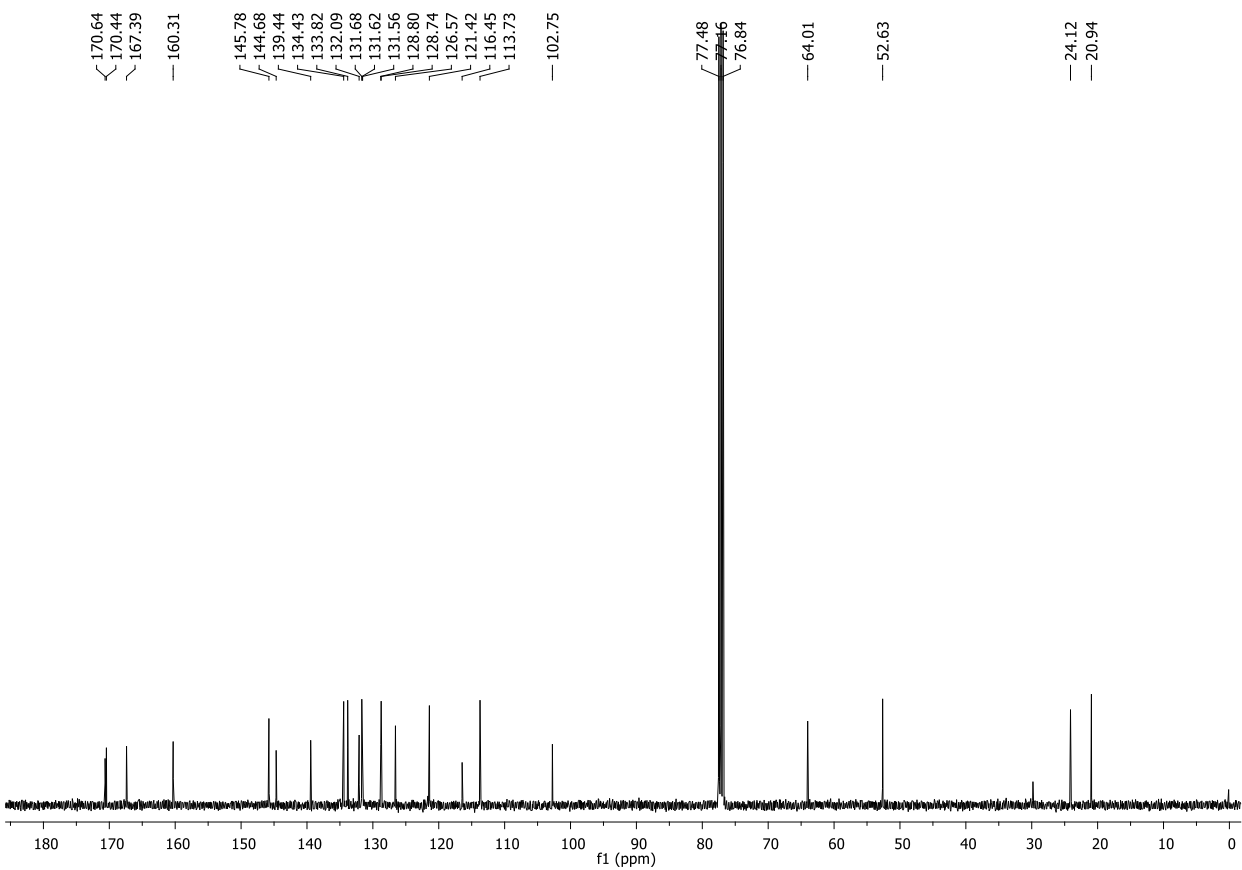

Methyl (*E*)-2-((2-cyanophenoxy)methyl)-3-(4-isopropyl-3-(1-methyl-2,5-dioxo-2,5-dihydro-1H-pyrrol-3-yl)phenyl)acrylate (12o)

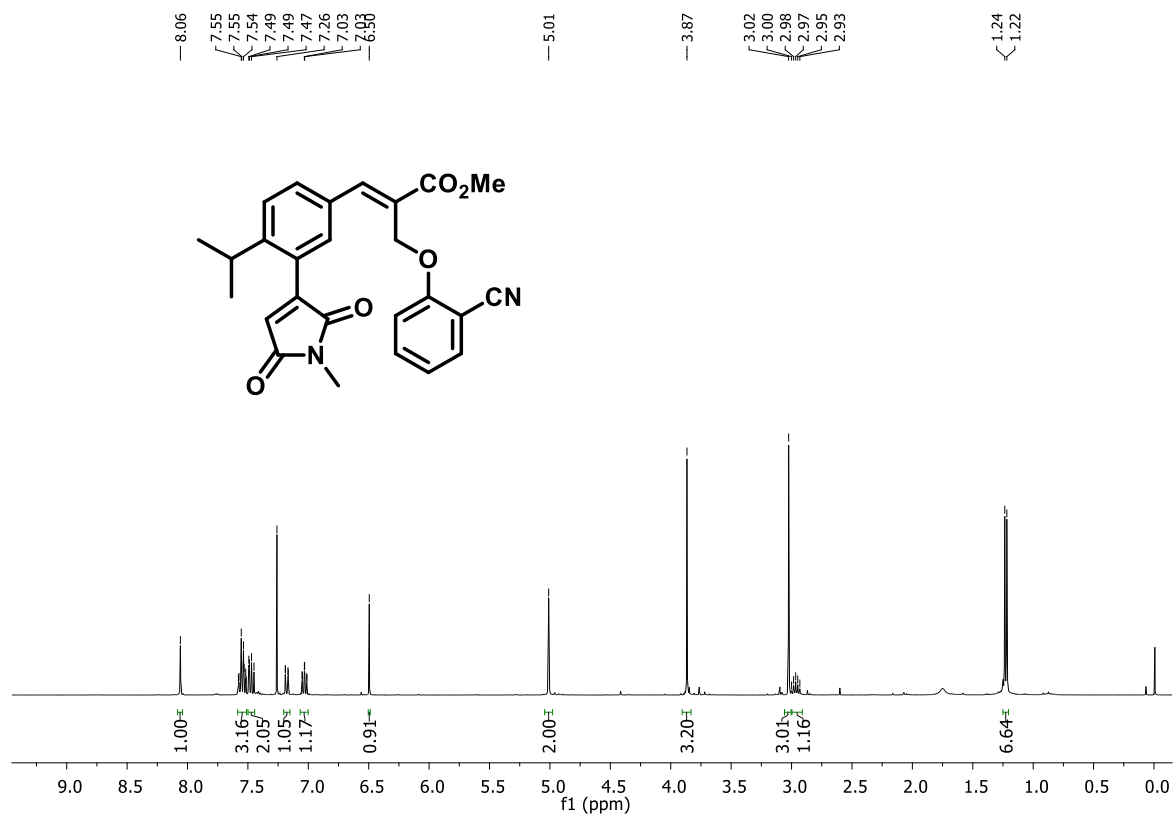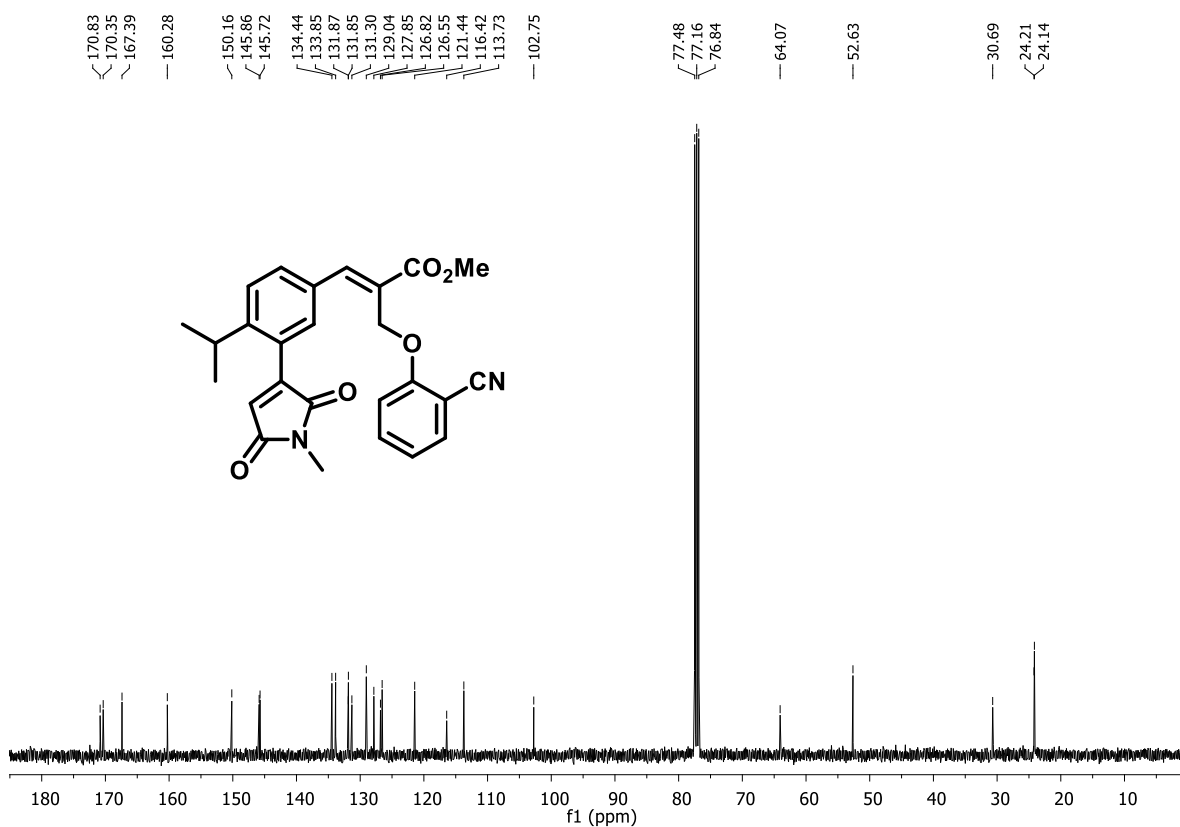

Methyl (E)-2-((2-cyanophenoxy)methyl)-3-(4-fluoro-3-(1-methyl-2,5-dioxo-2,5-dihydro-1H-pyrrol-3-yl)phenyl)acrylate (12p)

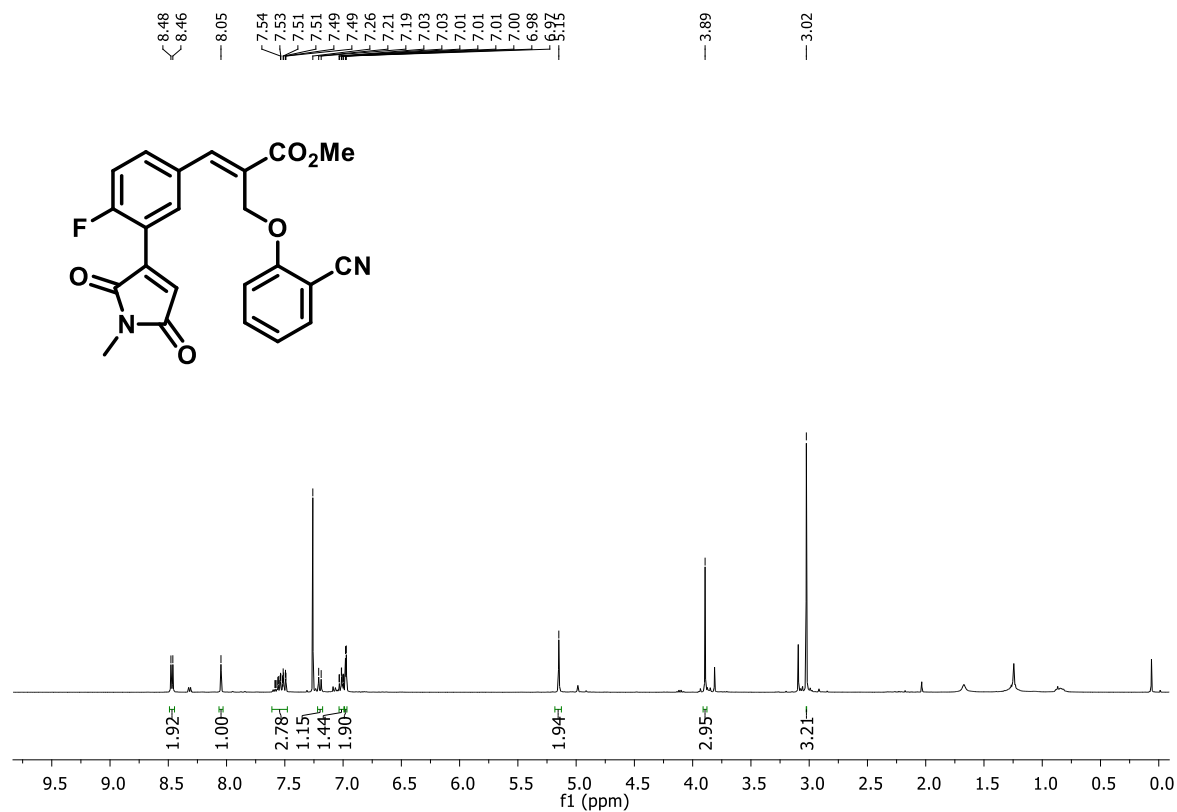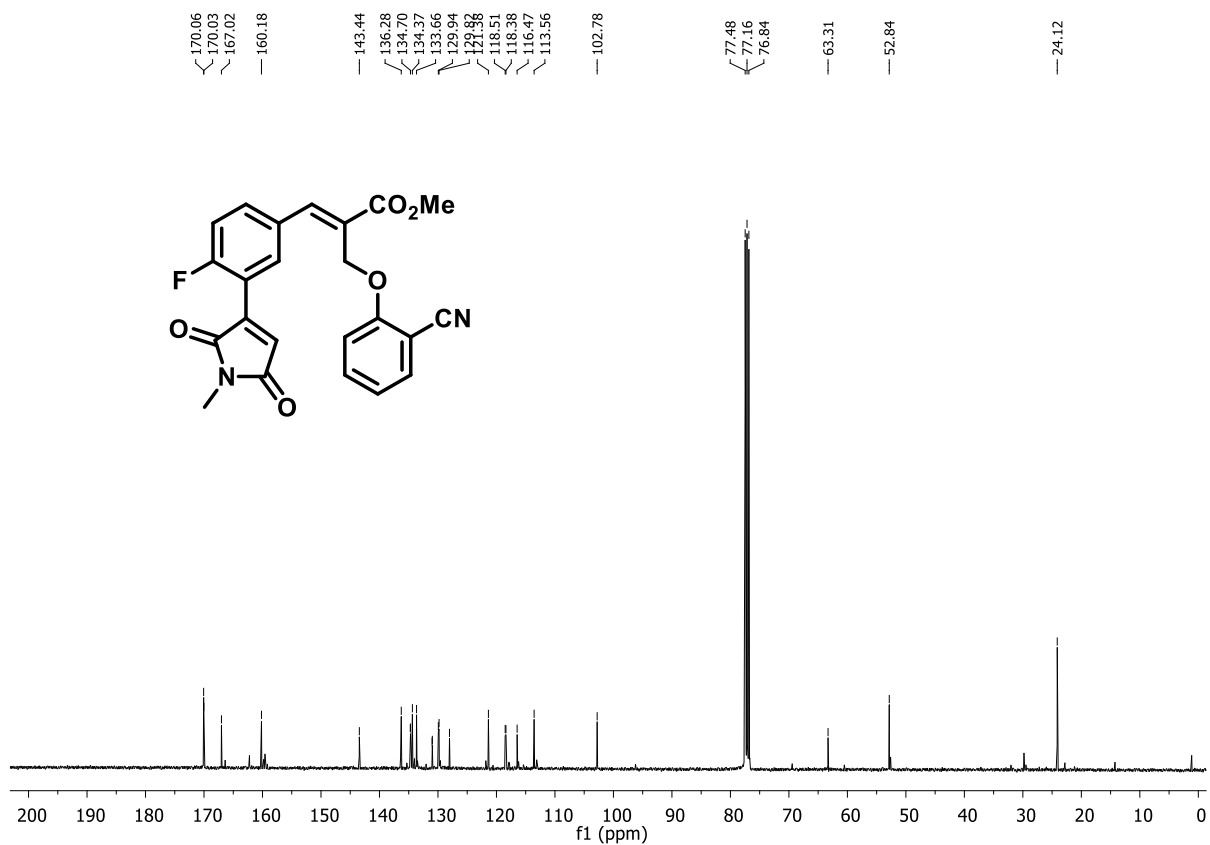

Methyl (*E*)-3-(4-chloro-3-(1-methyl-2,5-dioxo-2,5-dihydro-1H-pyrrol-3-yl)phenyl)-2-((2-cyanophenoxy)methyl)acrylate (12q)

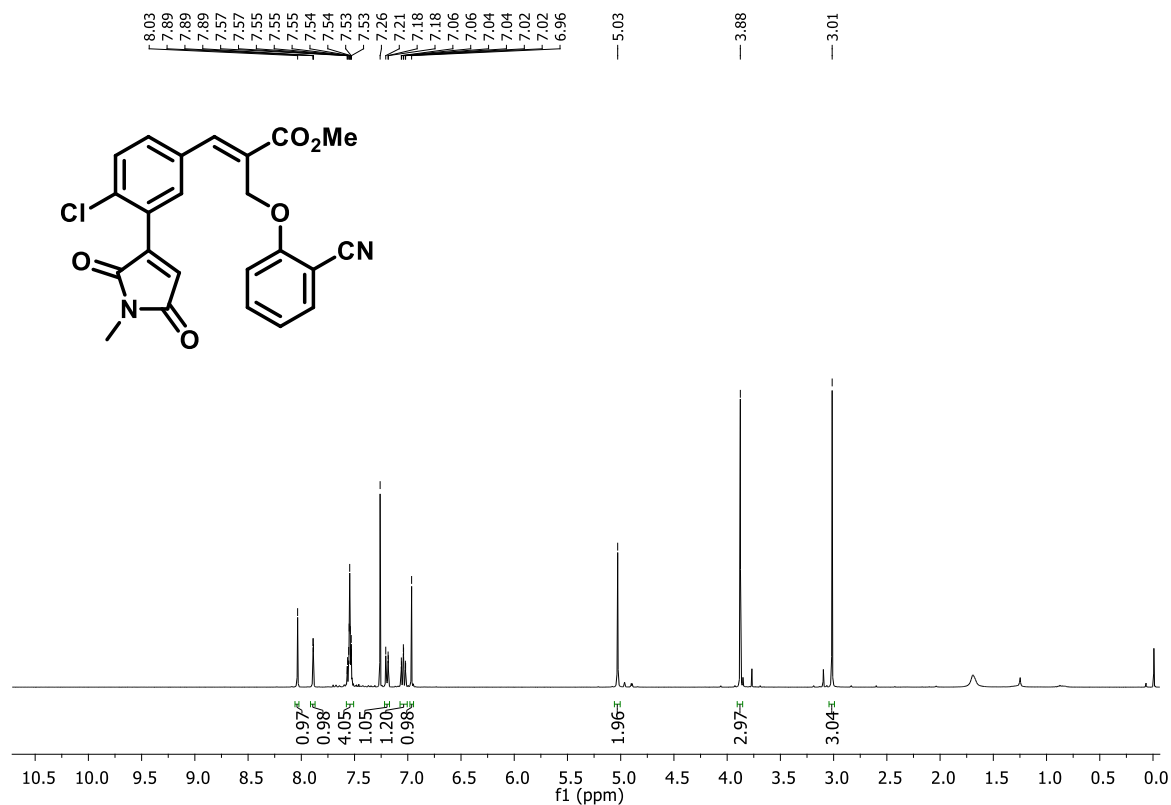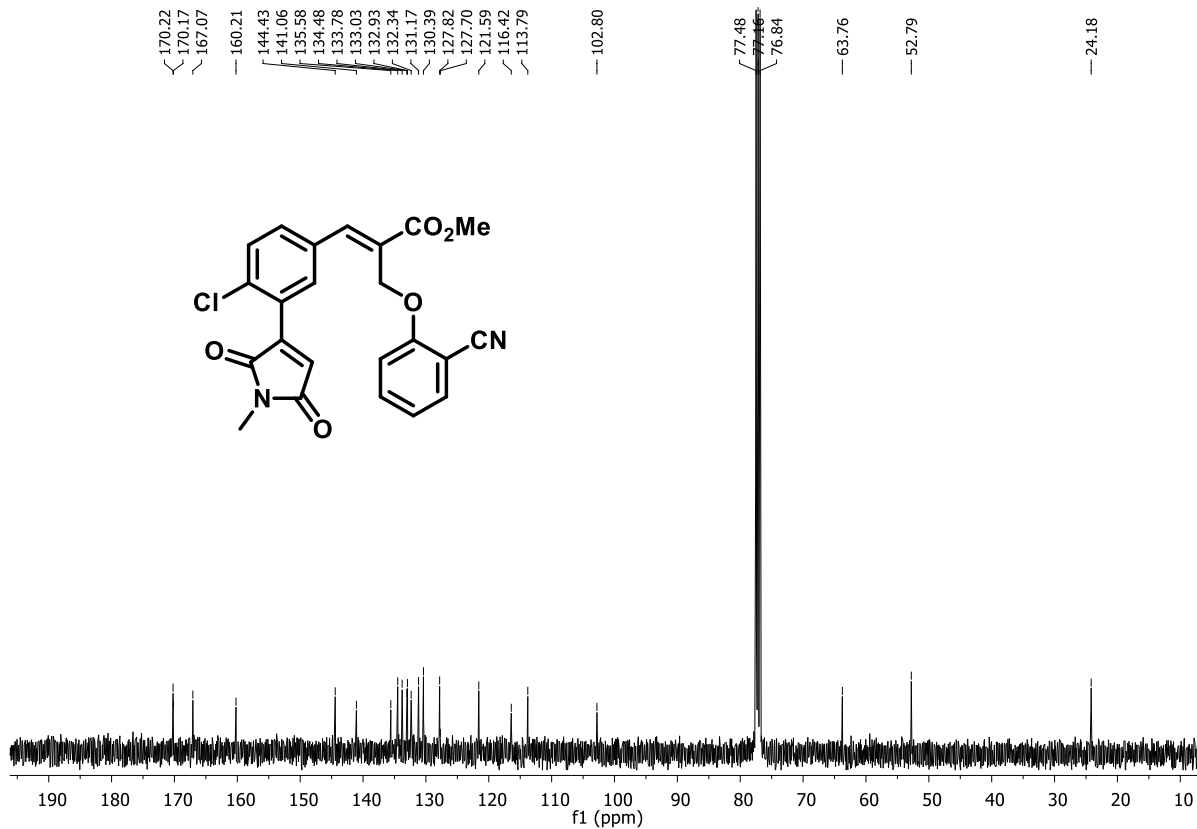

Methyl (*E*)-2-((2-cyanophenoxy)methyl)-3-(3-(1,1-dioxido-2,3-dihydrothiophen-3-yl)phenyl)acrylate (13a)

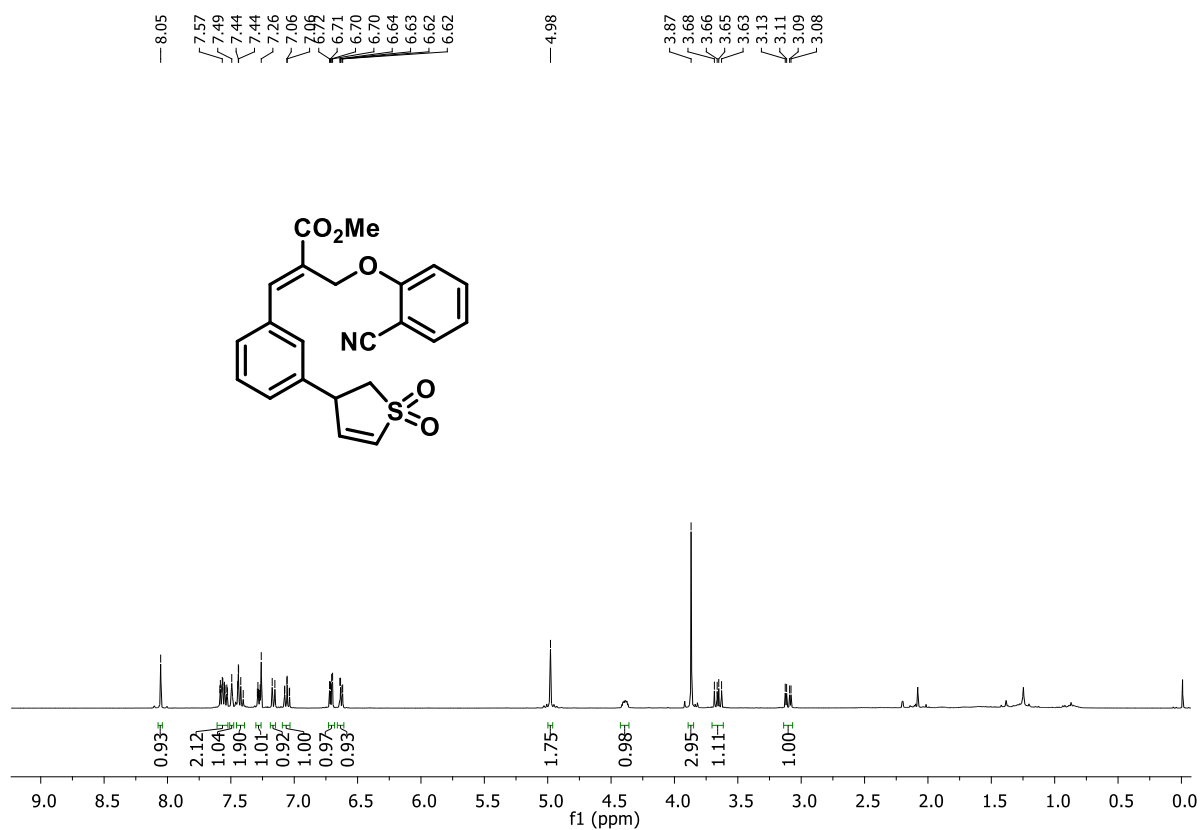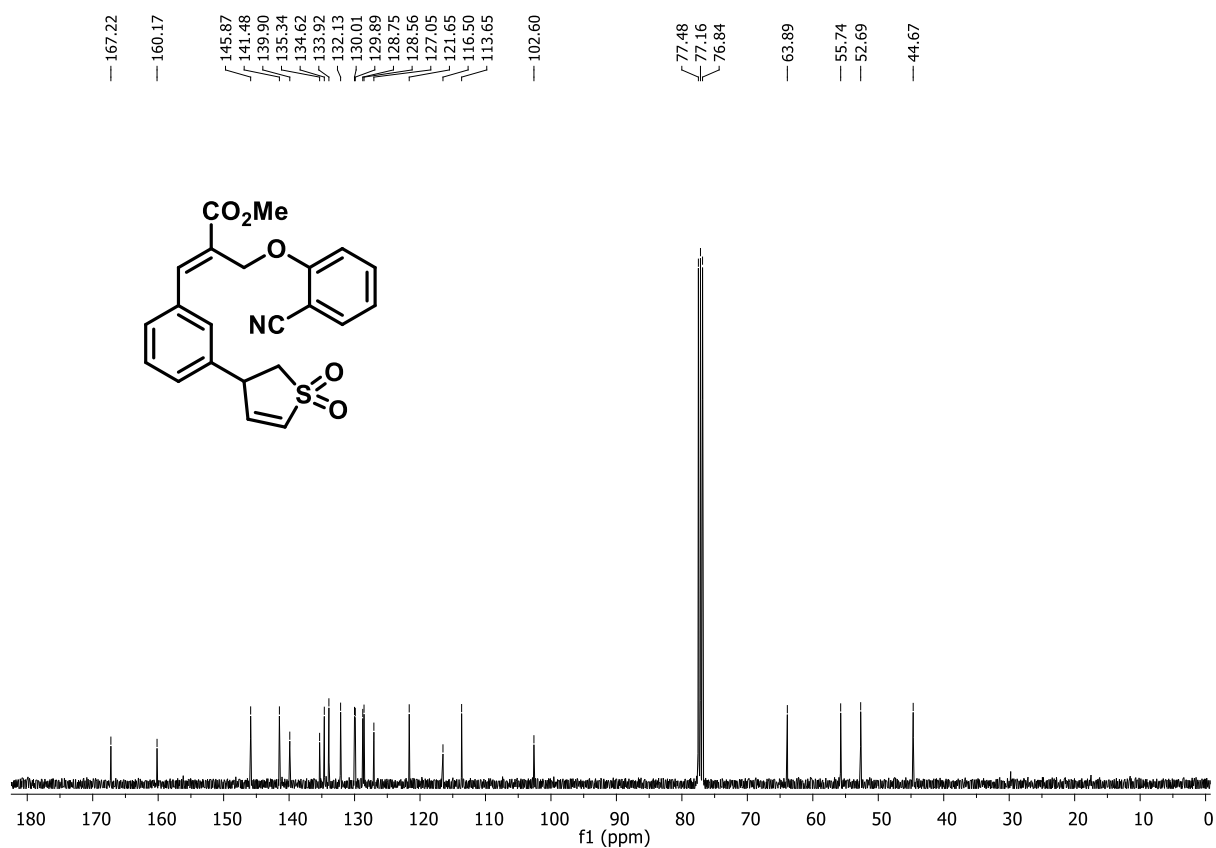



Ethyl (*E*)-2-((2-cyanophenoxy)methyl)-3-(3-(1,1-dioxido-2,3-dihydrothiophen-3-yl)phenyl) acrylate (13b)

8.05  
7.59  
7.57  
7.55  
7.55  
7.55  
7.53  
7.51  
7.48  
7.46  
7.45  
7.45  
7.43  
7.41  
7.31  
7.29  
7.29  
7.27  
7.27  
7.27  
7.26  
7.21  
7.19  
7.17  
7.08  
7.07  
7.06  
7.06  
7.04  
7.04  
6.73  
6.72  
6.71  
6.71  
6.66  
6.65  
6.64  
6.64  
4.99  
4.41  
4.40  
4.40  
4.39  
4.36  
4.34  
4.34  
4.32  
4.30  
3.70  
3.67  
3.66  
3.64  
3.14  
3.13  
3.11  
3.09  
1.38  
1.36  
1.34

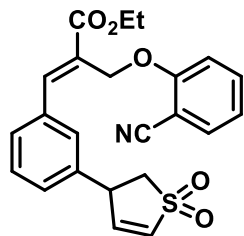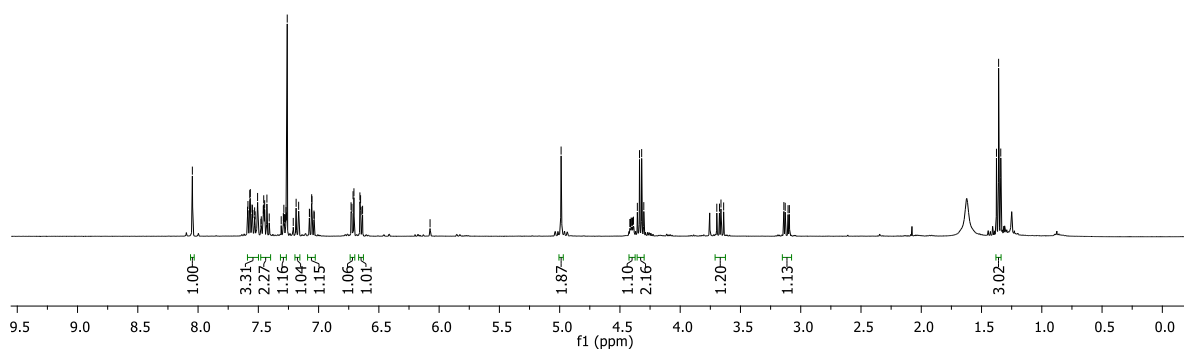

166.71  
160.22  
145.48  
141.53  
139.86  
135.40  
134.58  
133.88  
132.08  
129.96  
129.83  
128.65  
128.53  
127.38  
121.50  
116.50  
113.67  
102.57  
77.48  
77.16  
76.84  
63.91  
61.68  
55.73  
44.66  
14.33

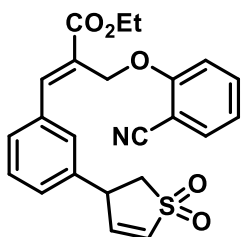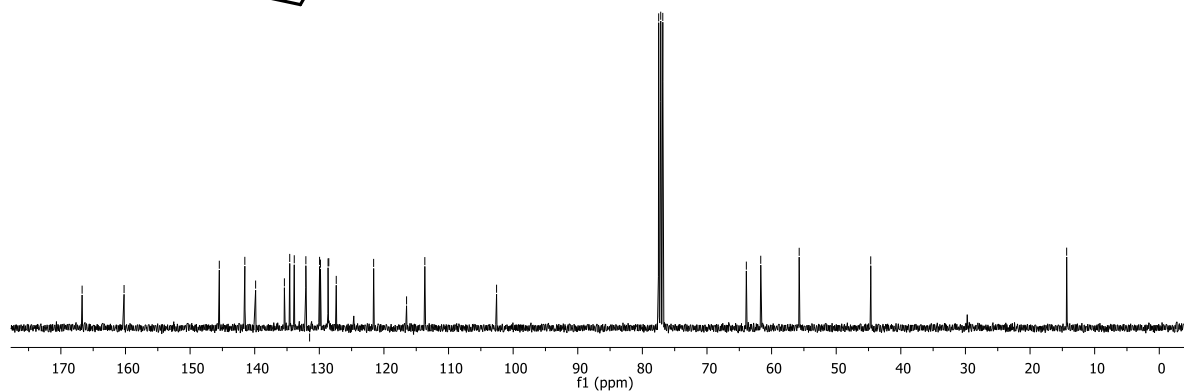

Methyl (*E*)-2-((2-cyanophenoxy)methyl)-3-(5-(1,1-dioxido-2,3-dihydrothiophen-3-yl)-2-methoxyphenyl)acrylate (13c)

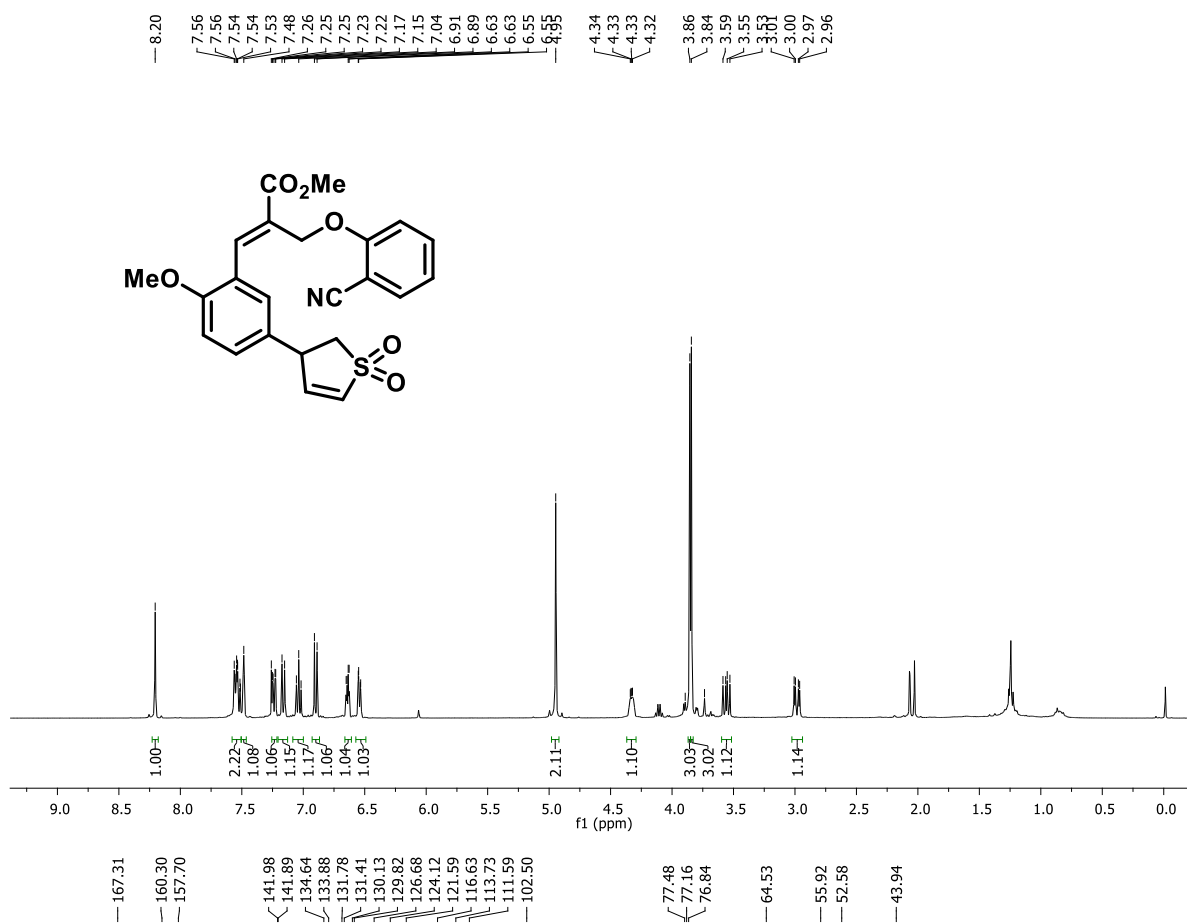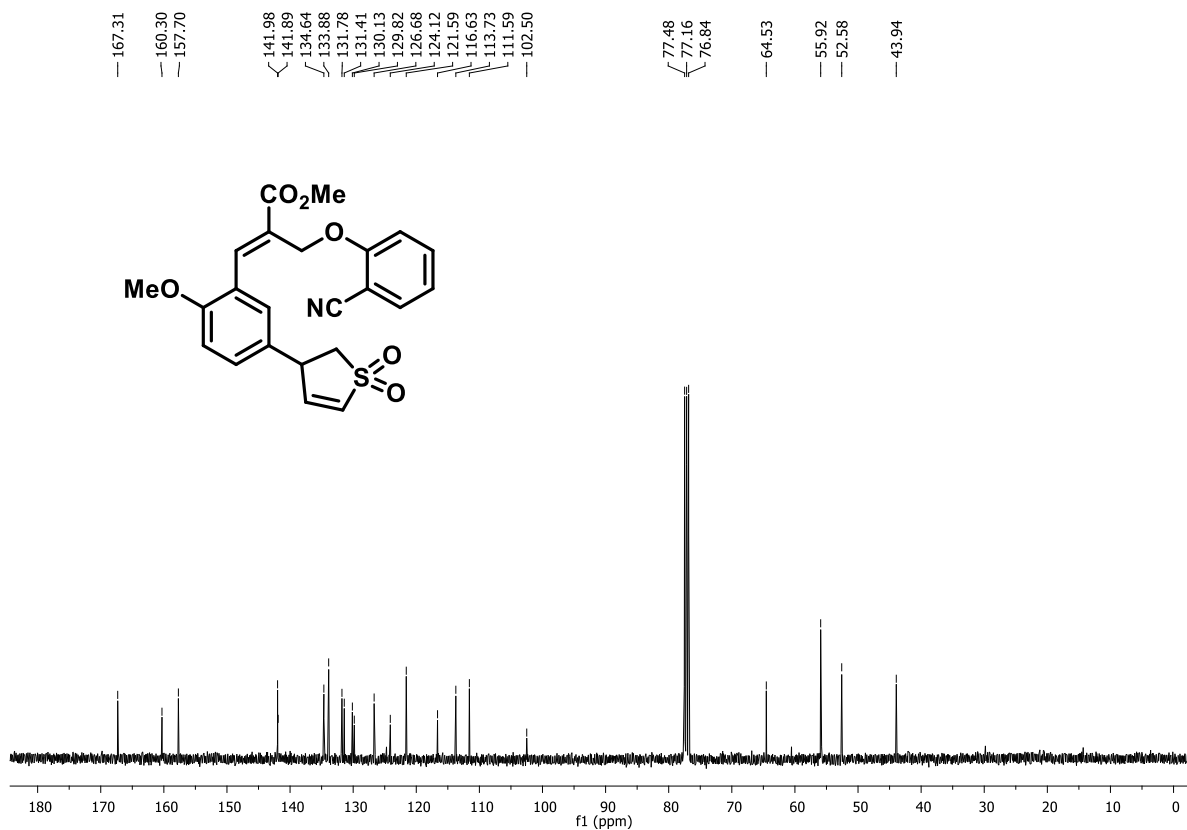

**Ethyl (E)-3-(4-chloro-3-(1,1-dioxido-2,3-dihydrothiophen-3-yl)phenyl)-2-((2-cyanophenoxy) methyl) acrylate (14d)**

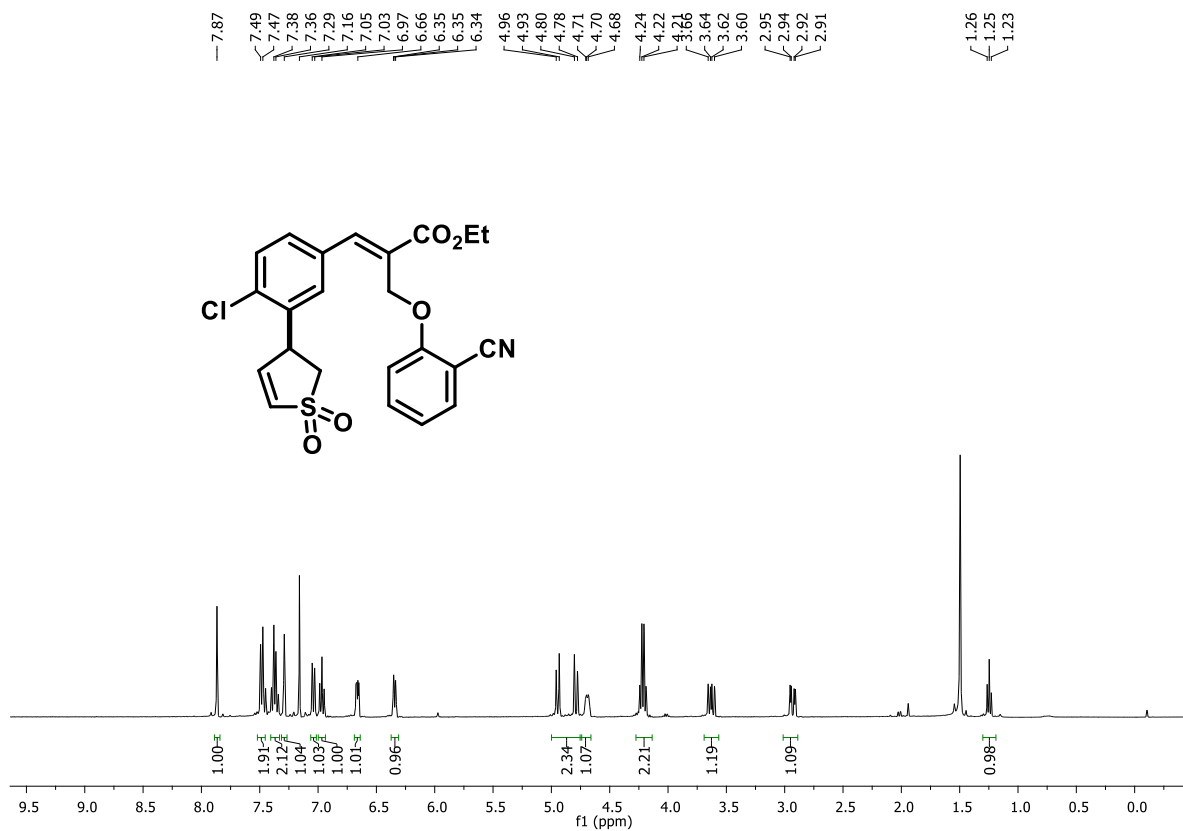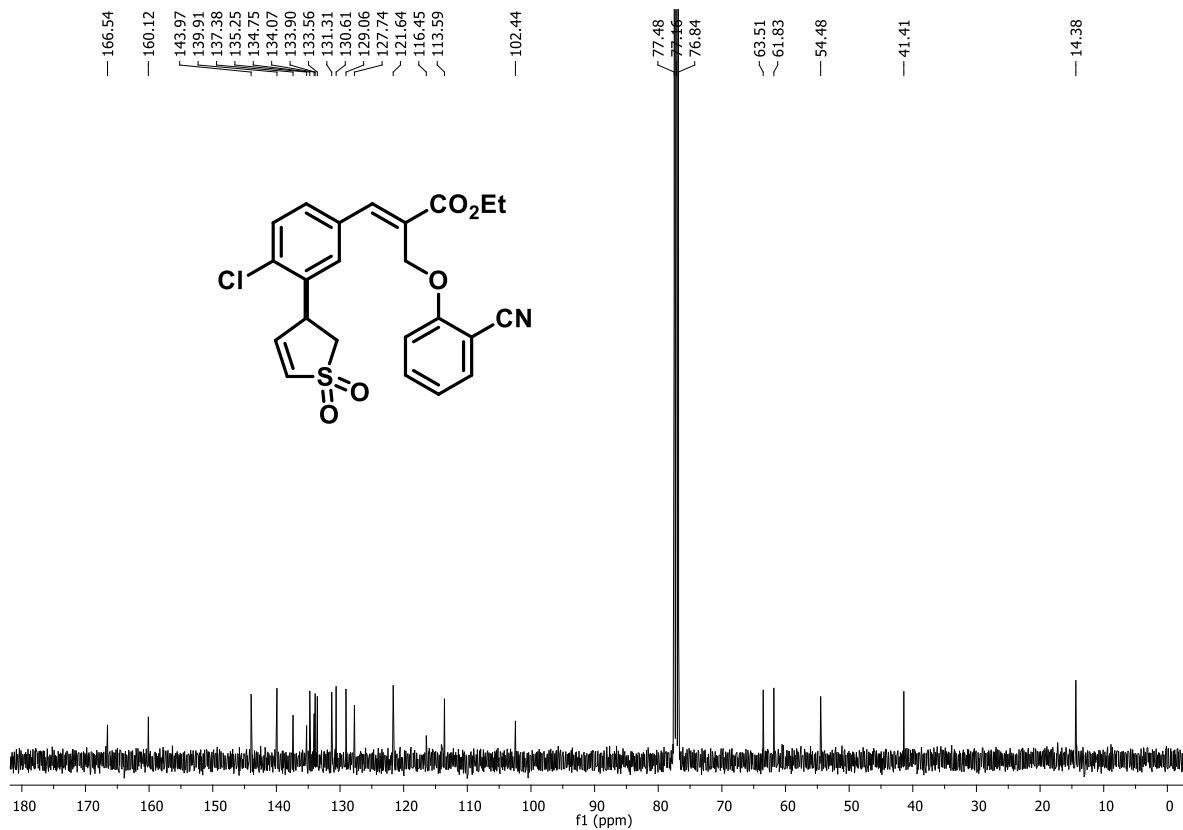

Methyl (*E*)-3-(3-acetoxyphenyl)-2-((2-cyanophenoxy)methyl)acrylate (14a)

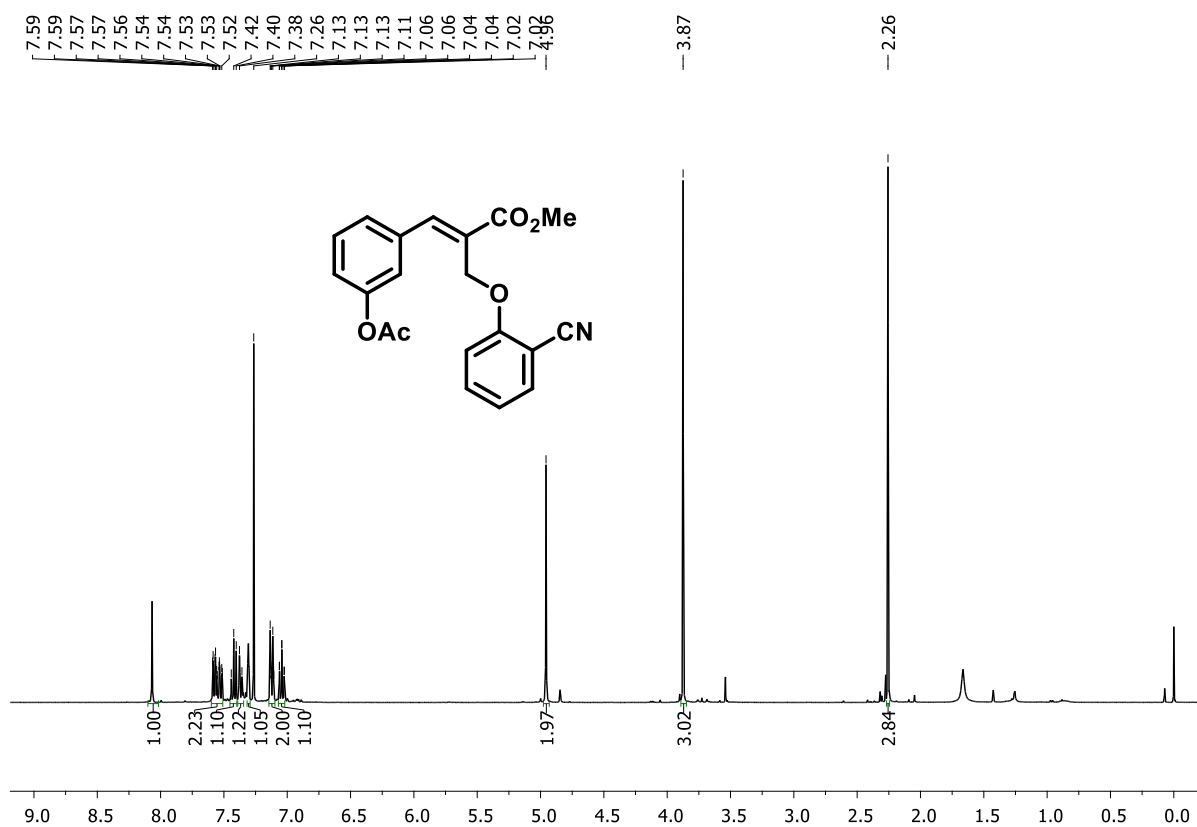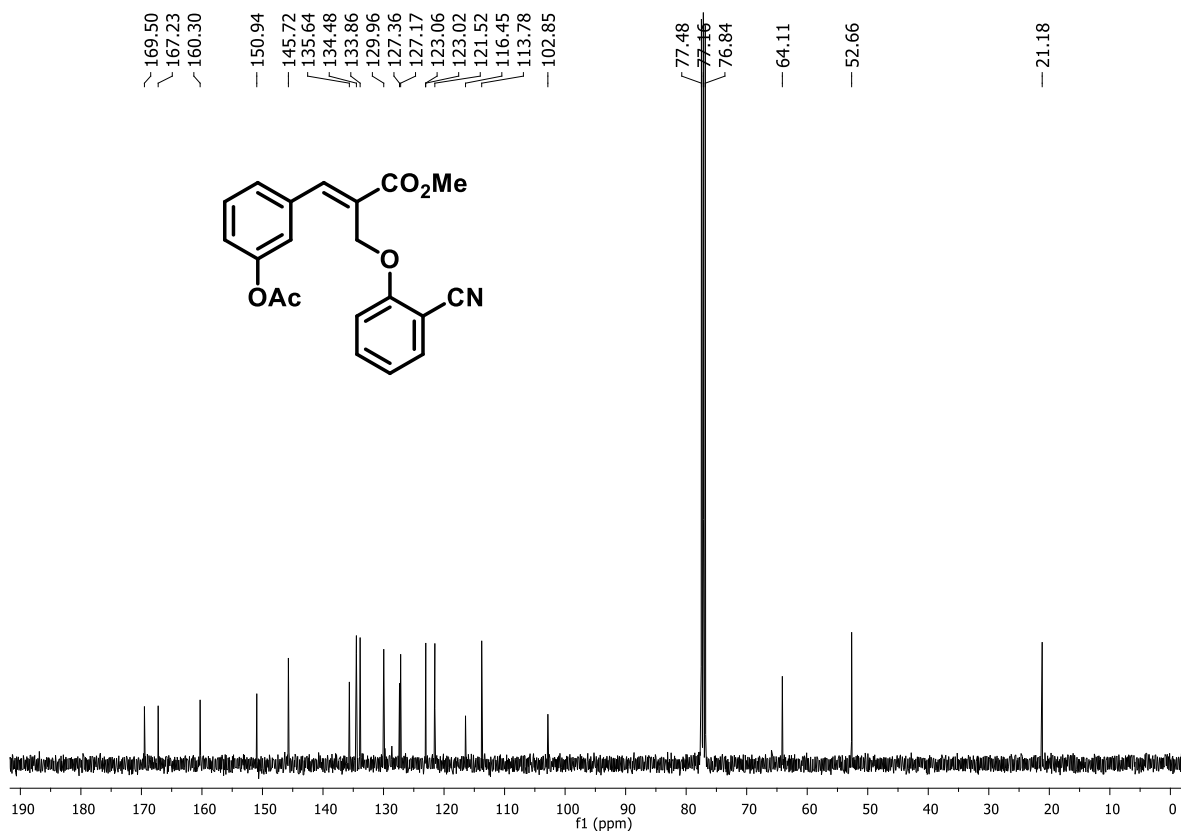

Ethyl (*E*)-3-(3-acetoxyphenyl)-2-((2-cyanophenoxy)methyl)acrylate (14b)

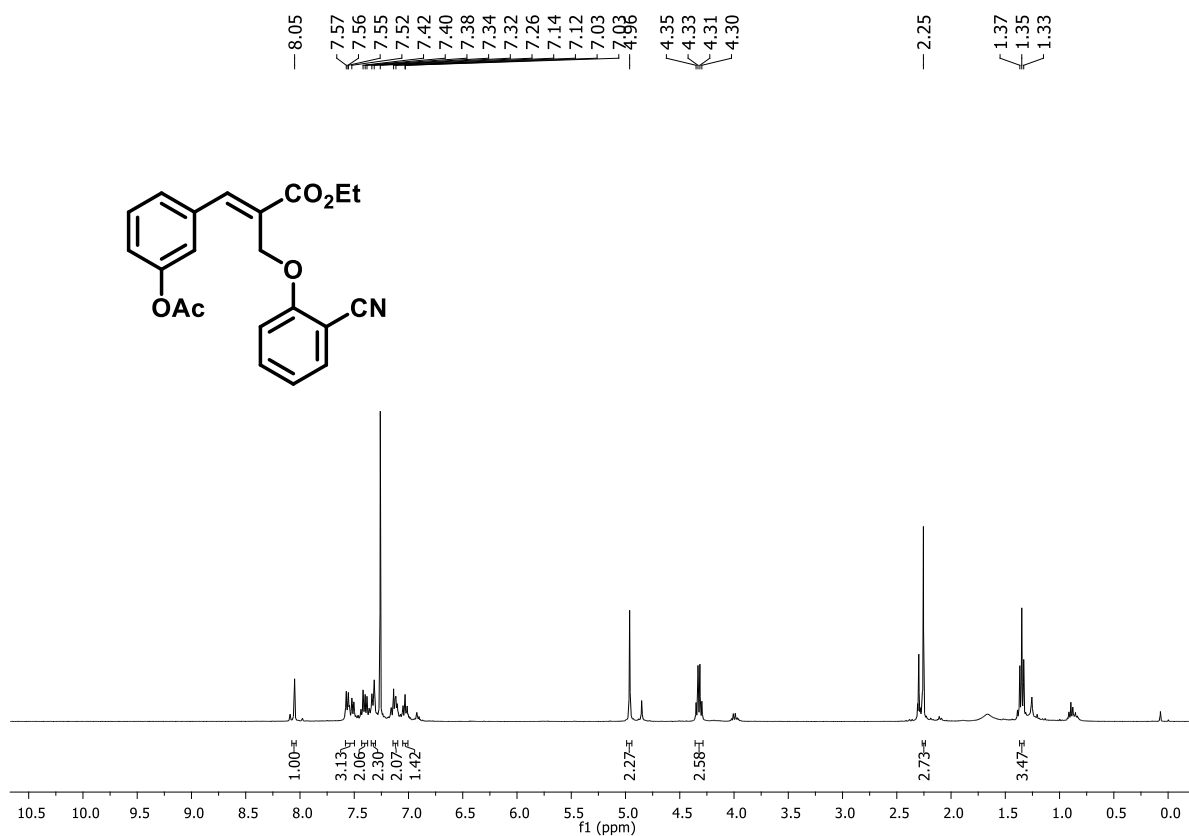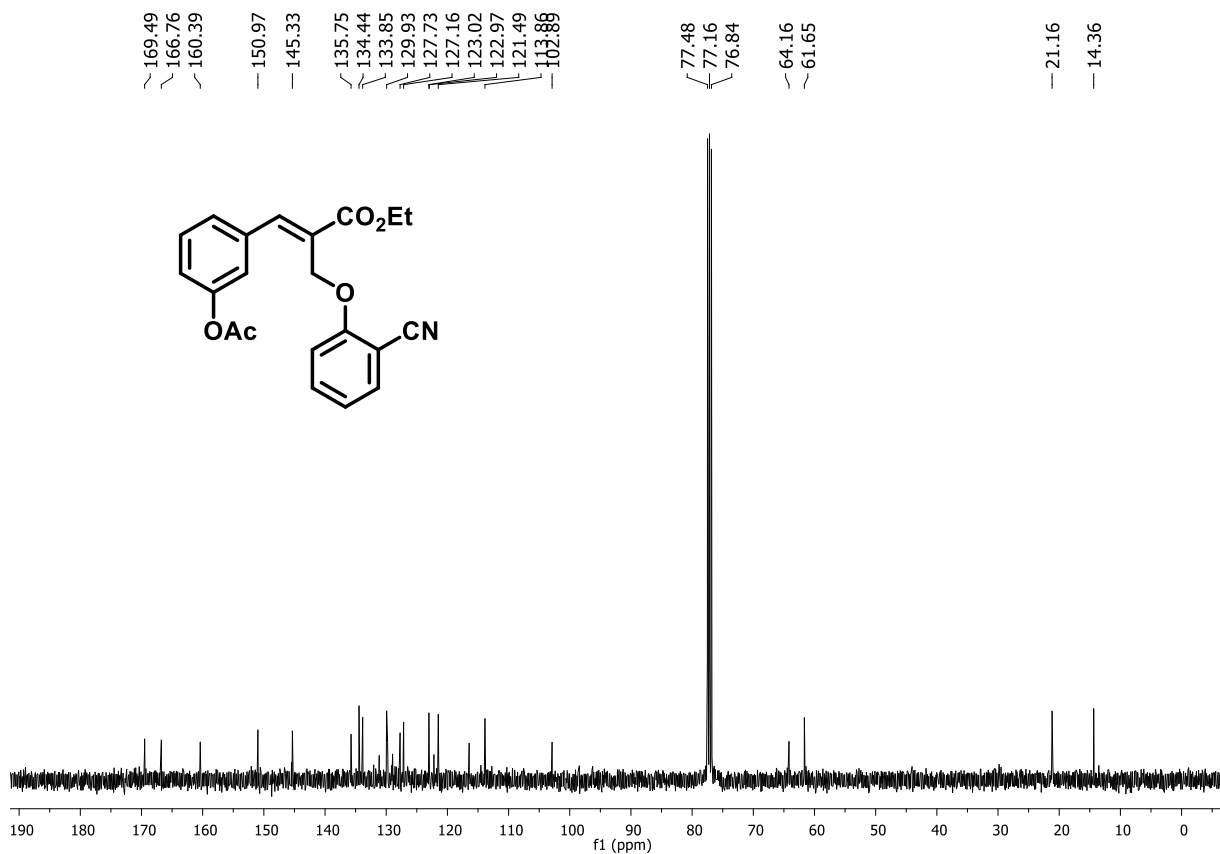

Methyl (*E*)-3-(5-acetoxy-2-methoxyphenyl)-2-((2-cyanophenoxy)methyl) acrylate (14c)

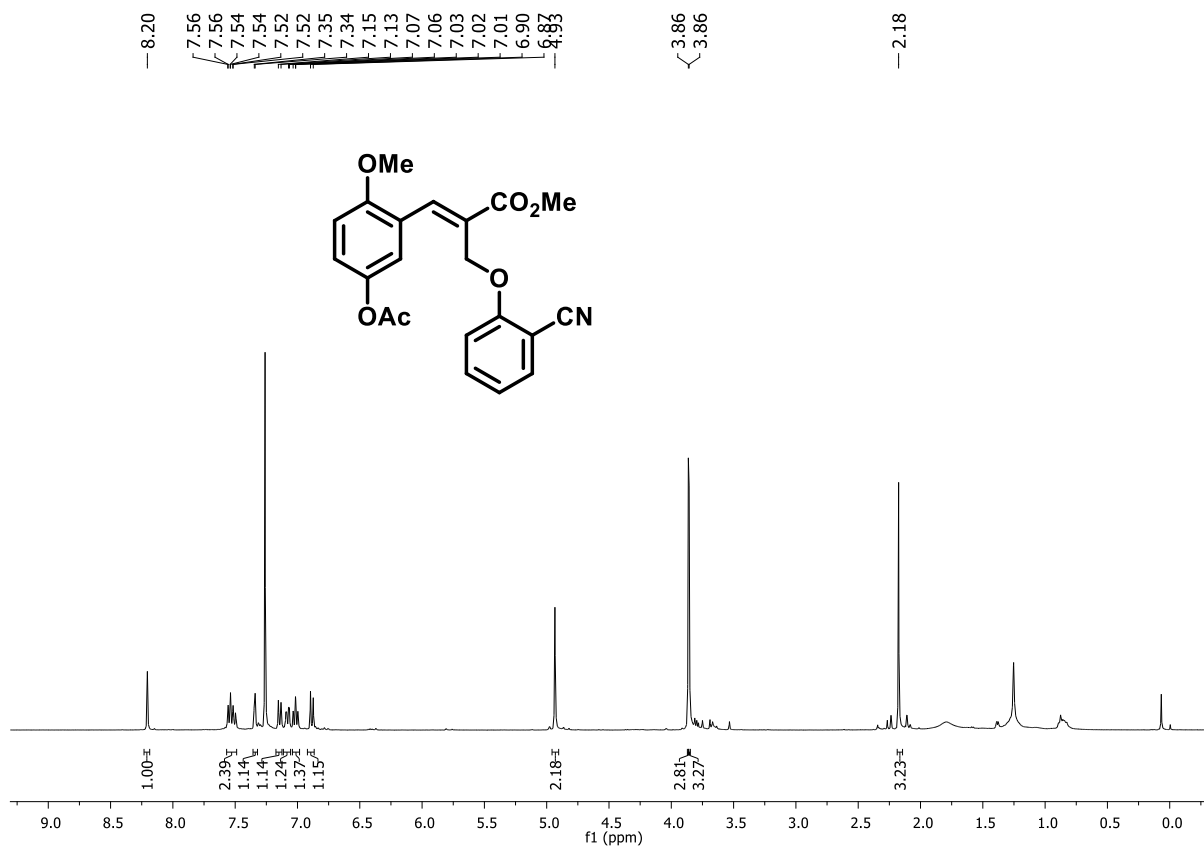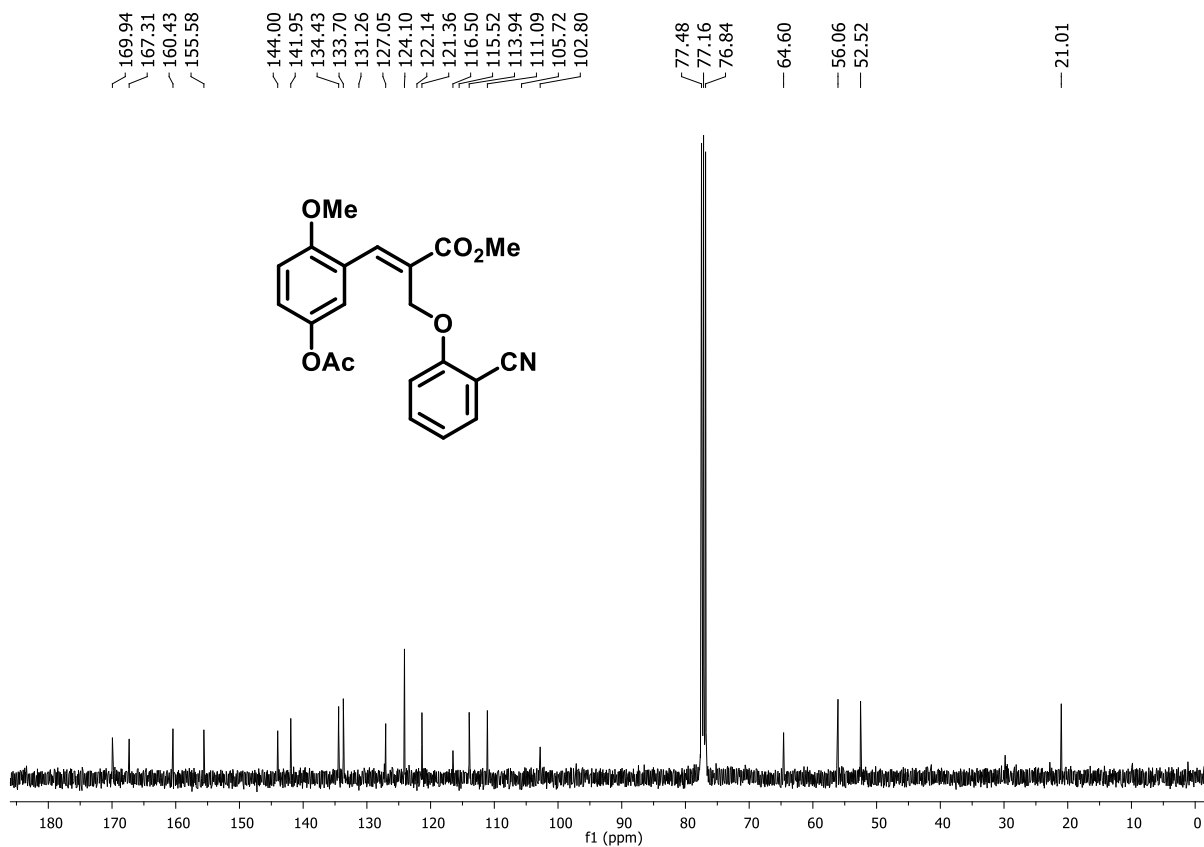

Methyl (*E*)-3-(5-acetoxy-2-methylphenyl)-2-((2-cyanophenoxy)methyl)acrylate (14d)

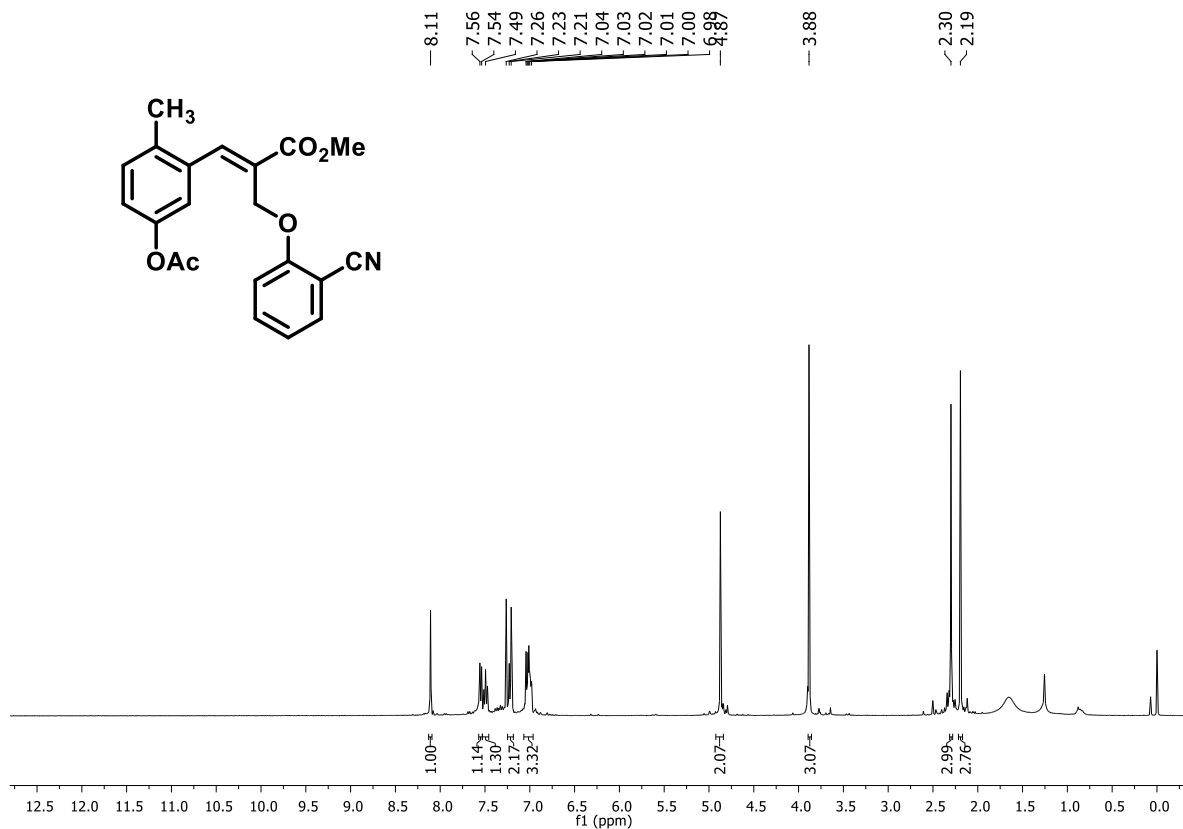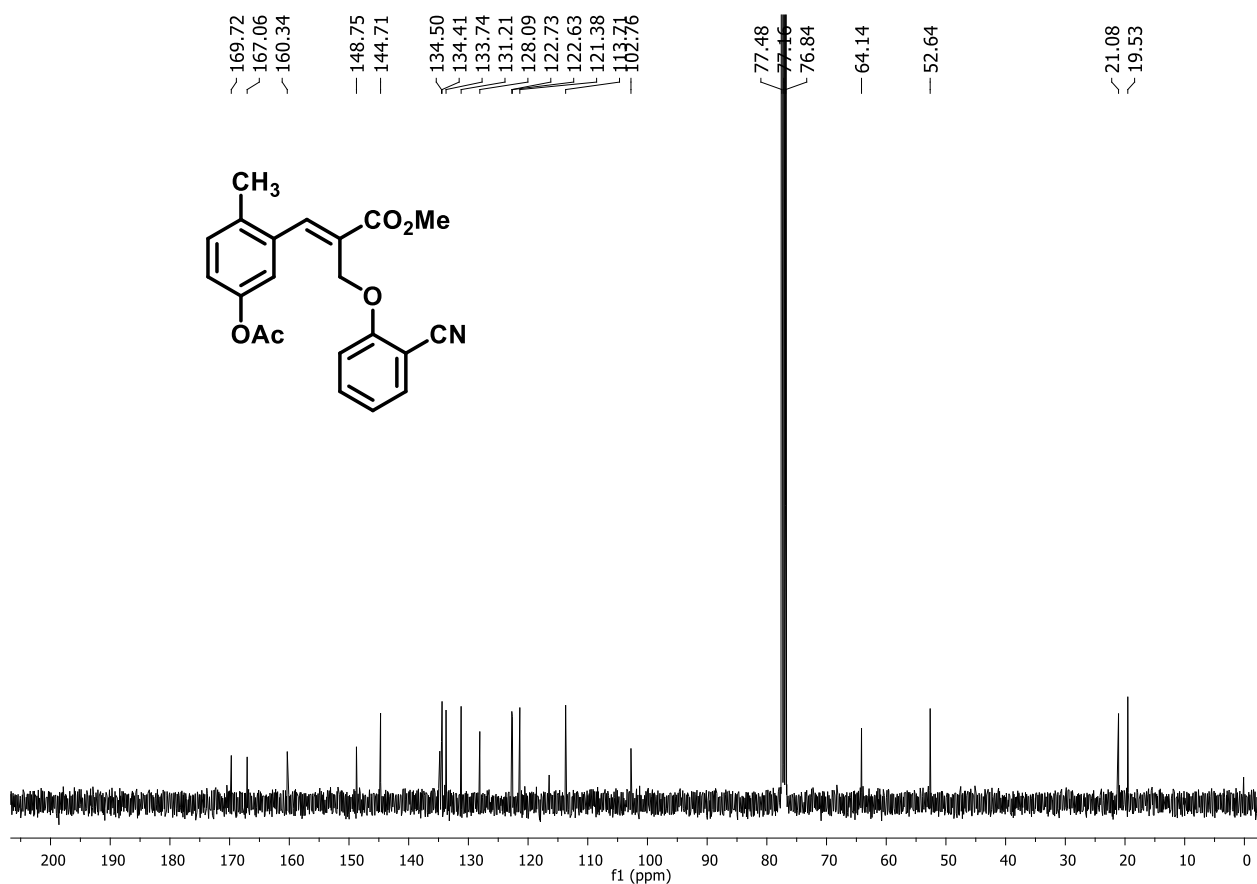

Methyl (*E*)-3-(3-acetoxy-4-methylphenyl)-2-((2 cyanophenoxy)methyl) acrylate (14e)

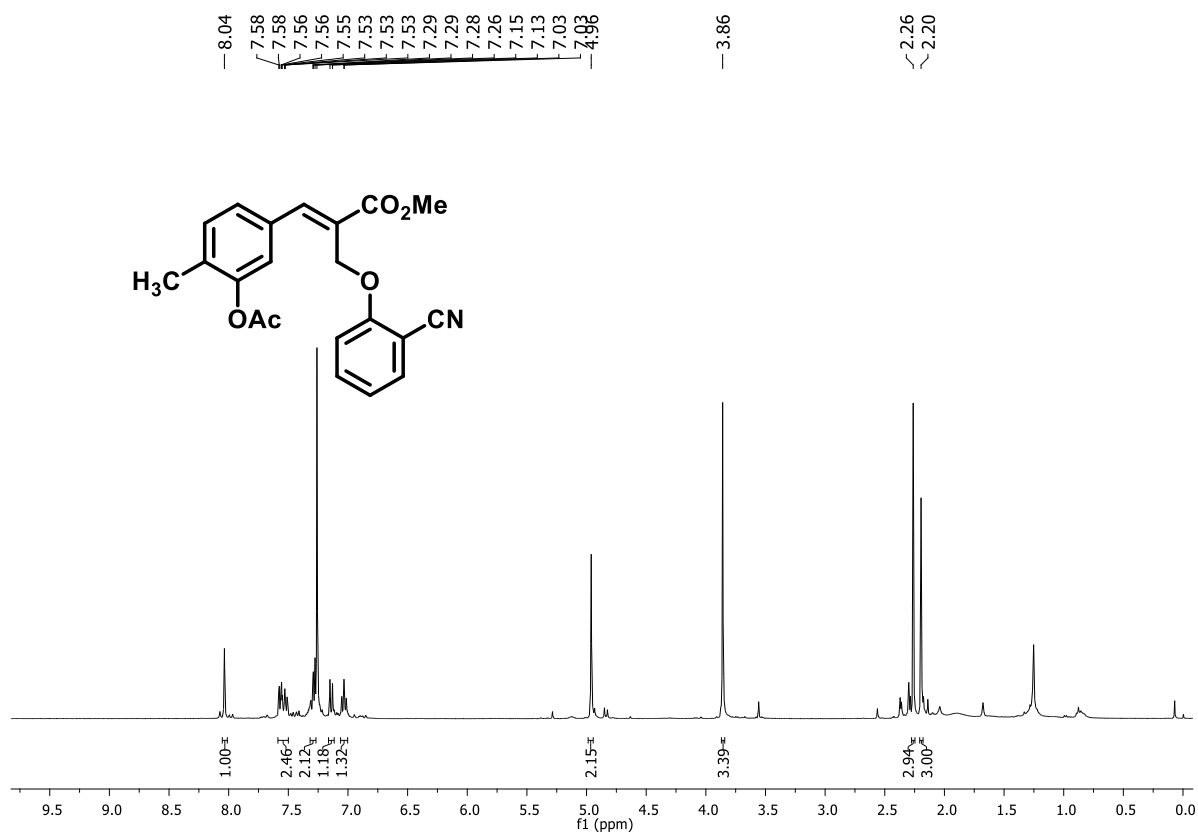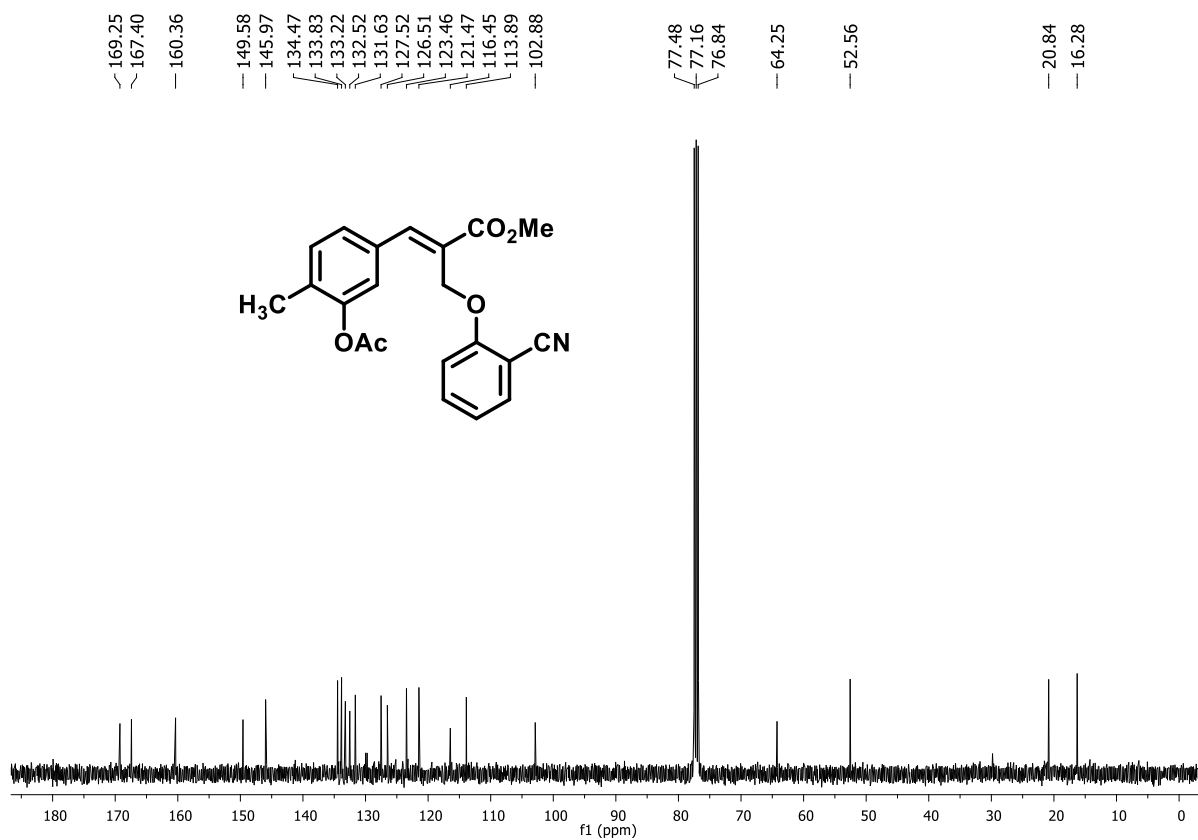



Methyl (*E*)-3-(3-acetoxy-4-fluorophenyl)-2-((2-cyanophenoxy)methyl) acrylate (14f)

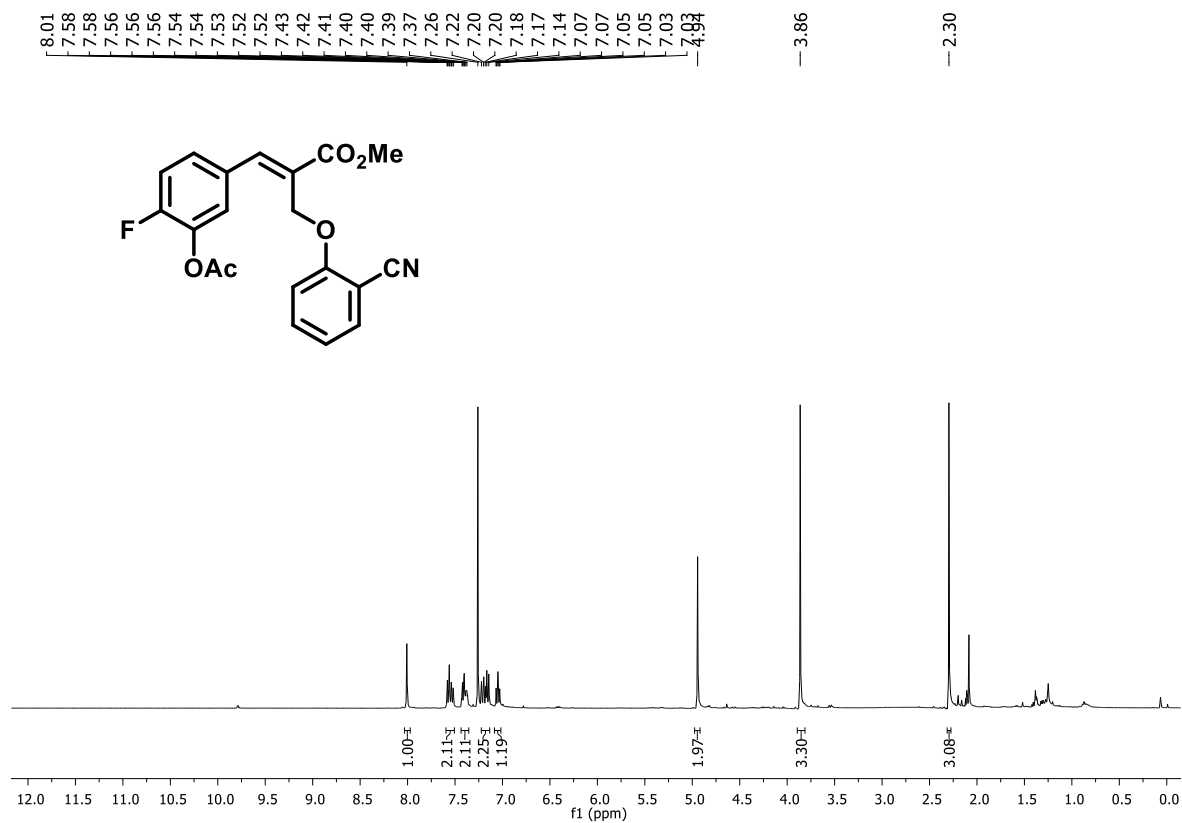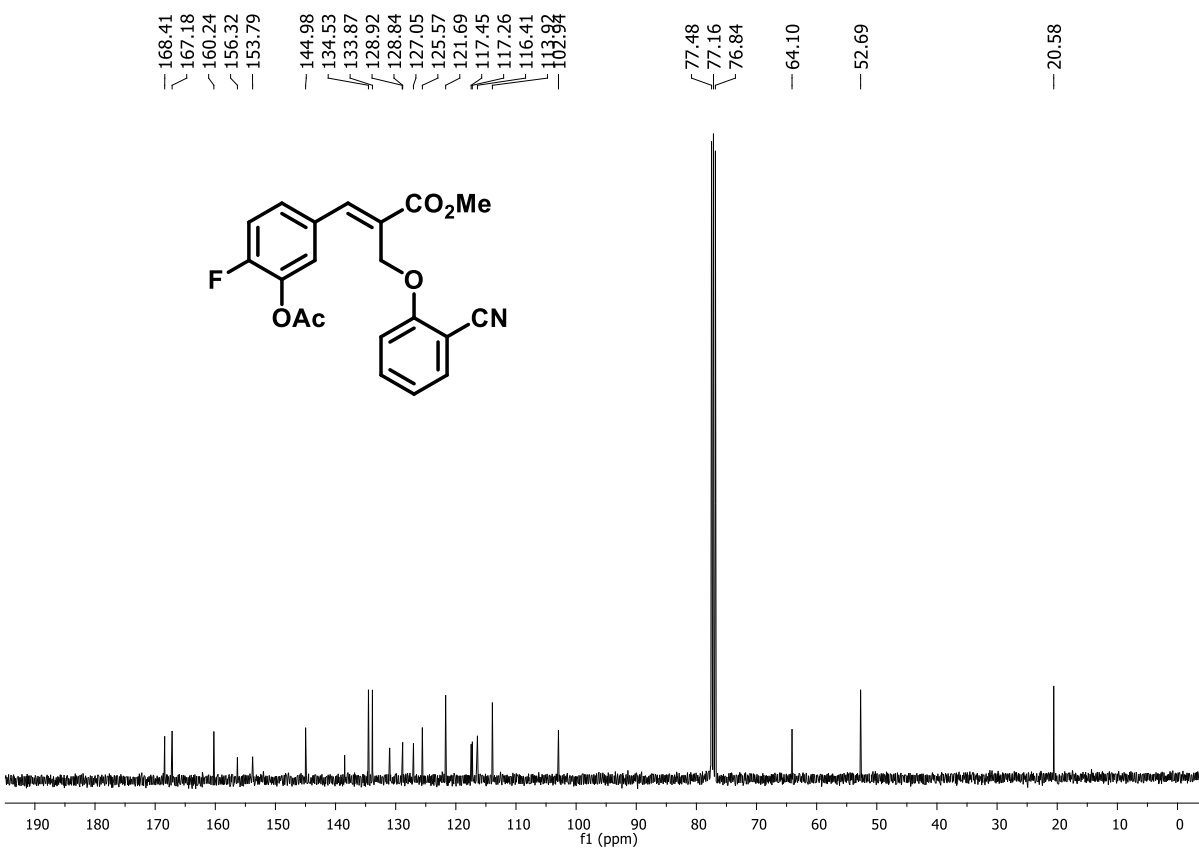

# Methyl (*E*)-2-((2-cyanophenoxy)methyl)-3-(3-cyanophenyl)acrylate (15a)

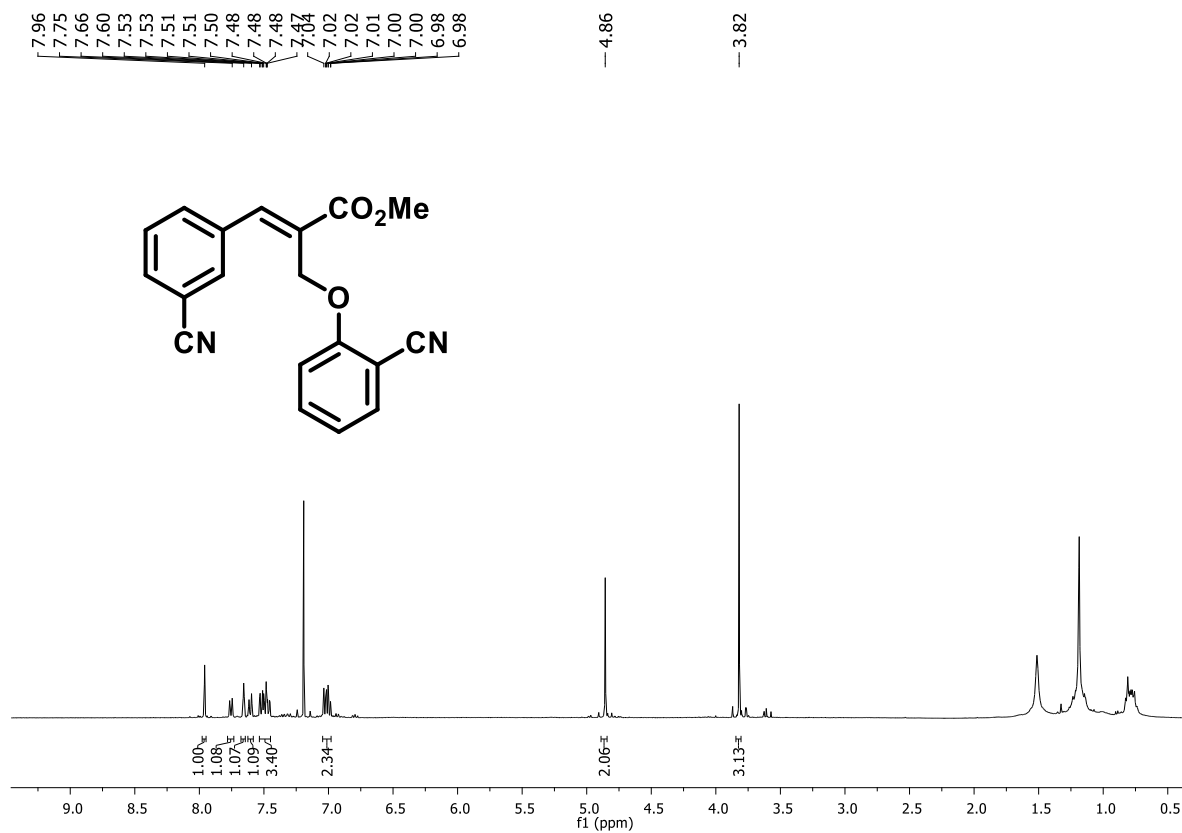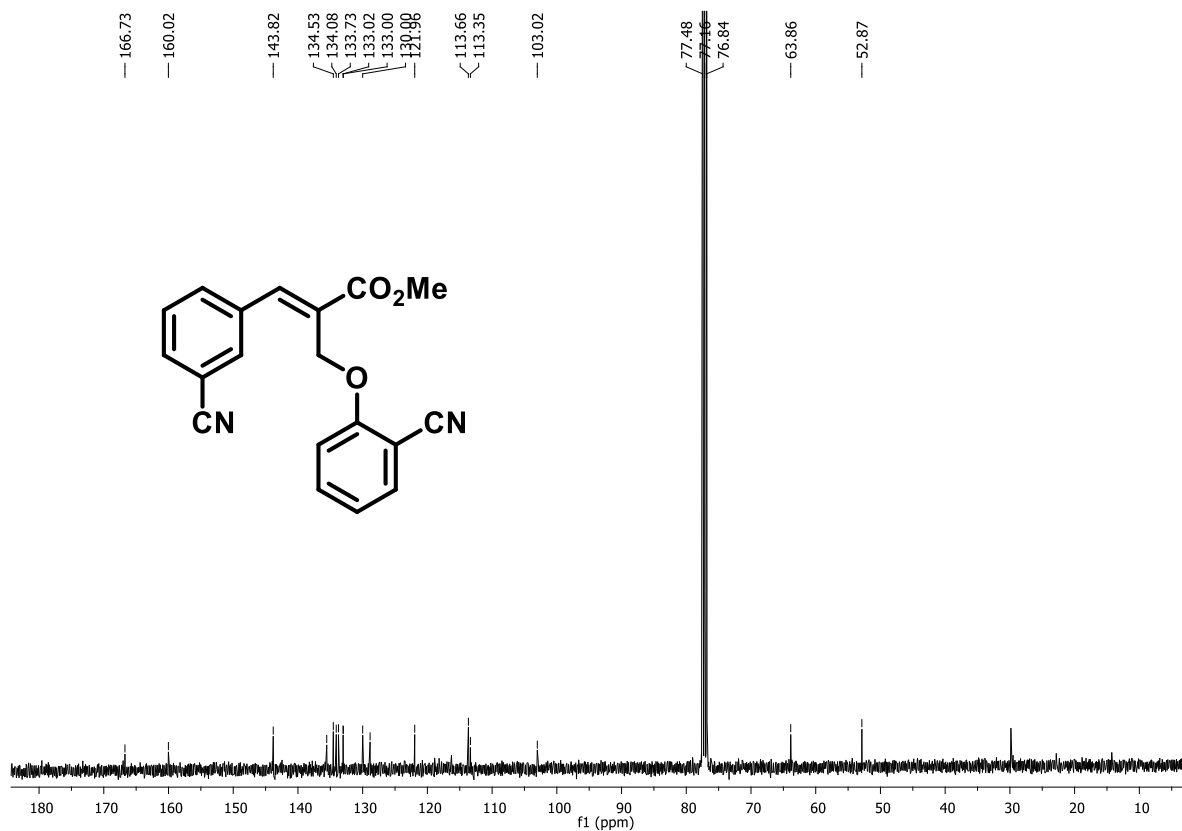

Methyl (*E*)-3-(5-cyano-2-methoxyphenyl)-2-((2-cyanophenoxy)methyl)acrylate (15b)

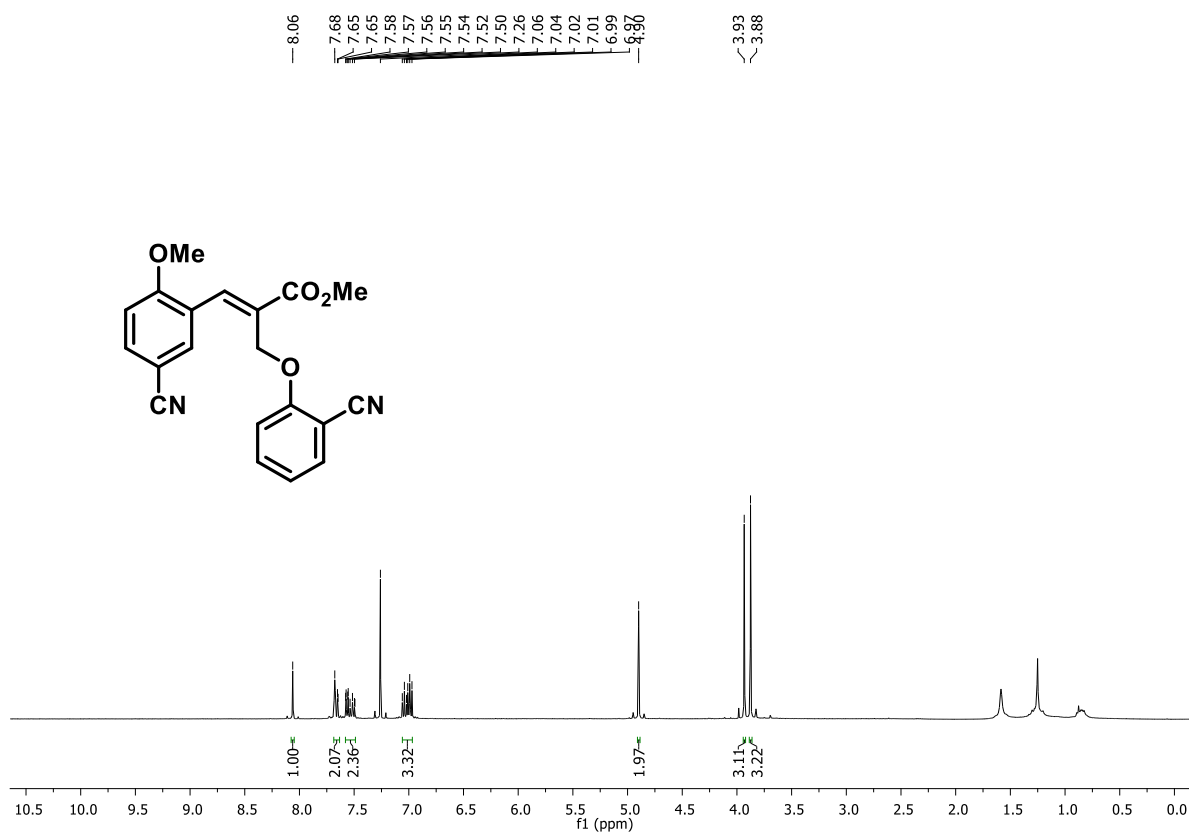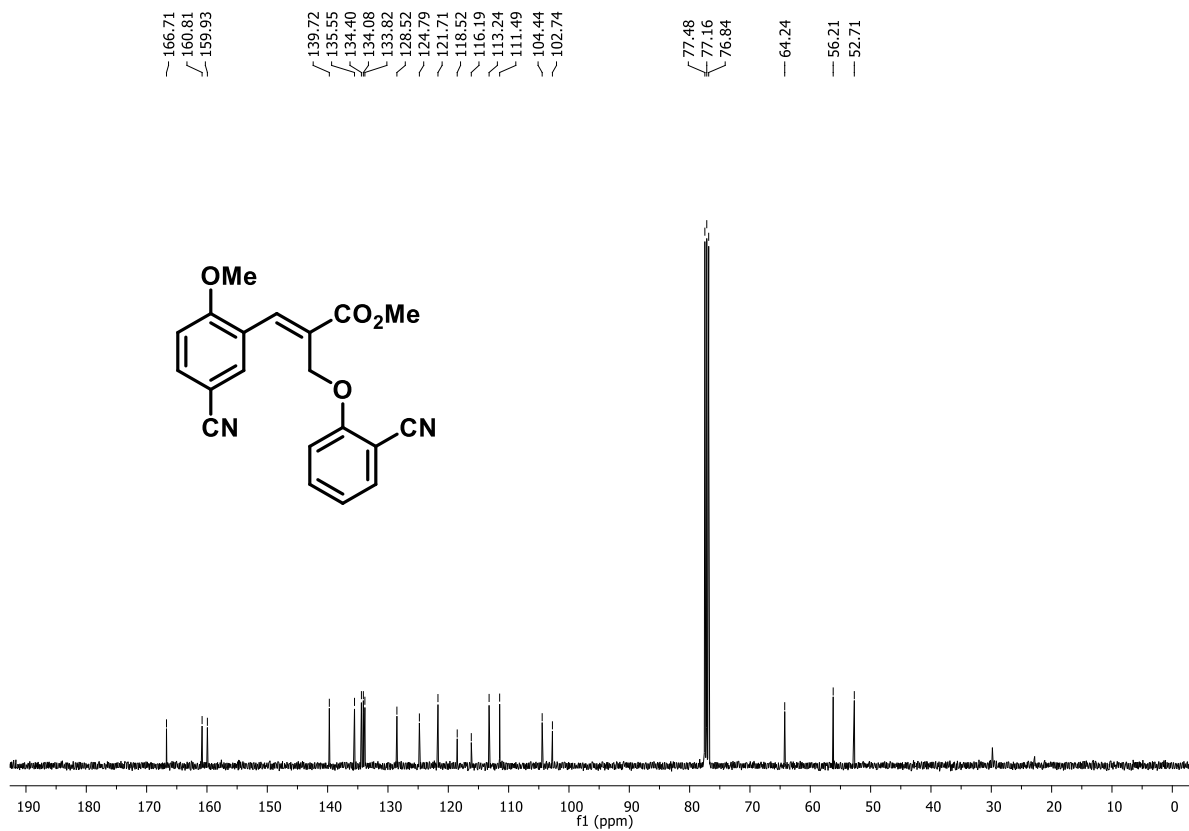

Methyl (*E*)-3-(4-cyano-3-methylphenyl)-2-((2-cyanophenoxy)methyl)acrylate (15c)

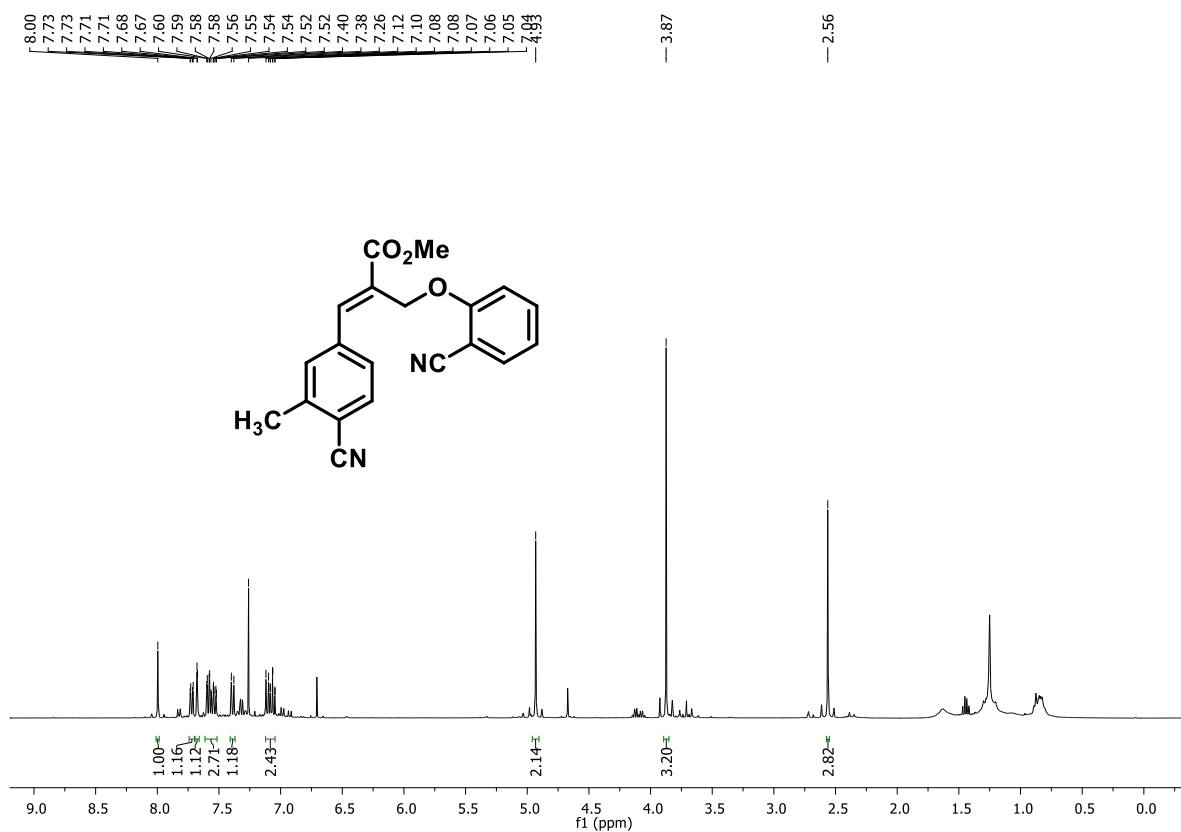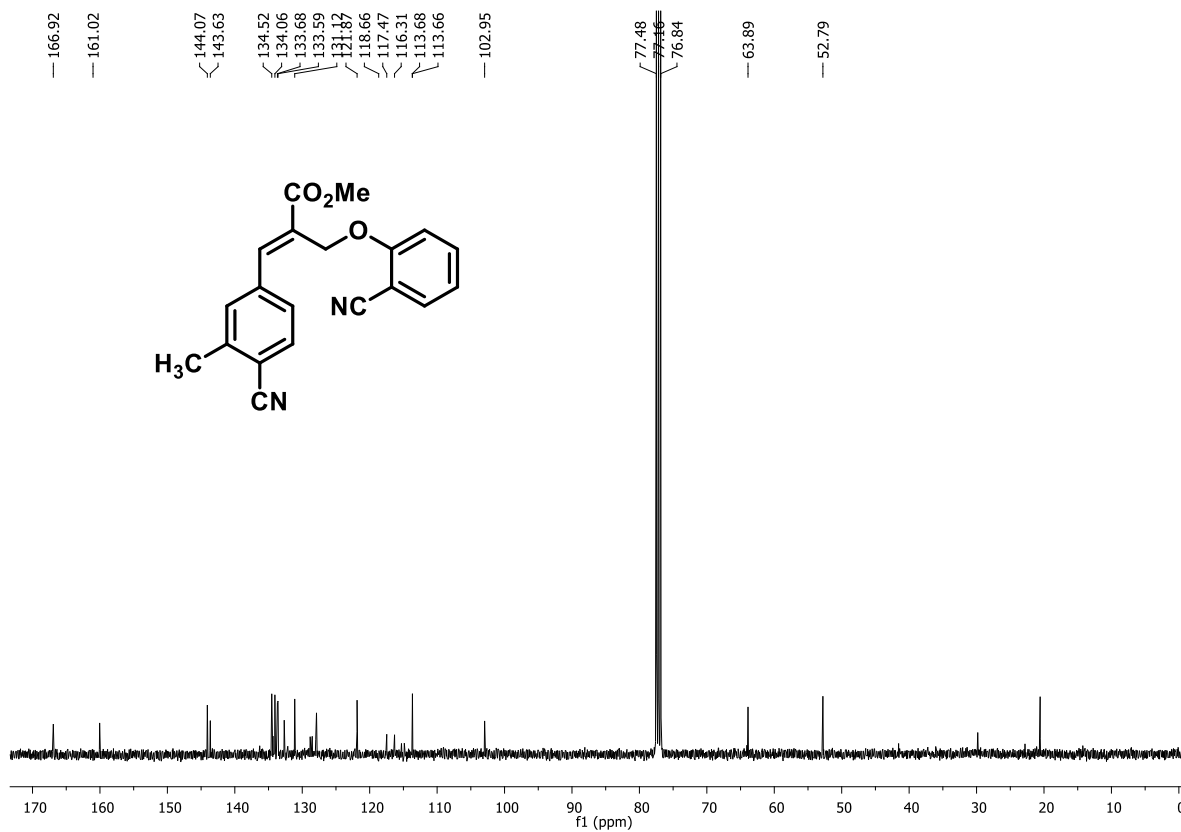

Ethyl (*E*)-3-(3-cyano-4-methylphenyl)-2-((2-cyanophenoxy)methyl)acrylate (15d)

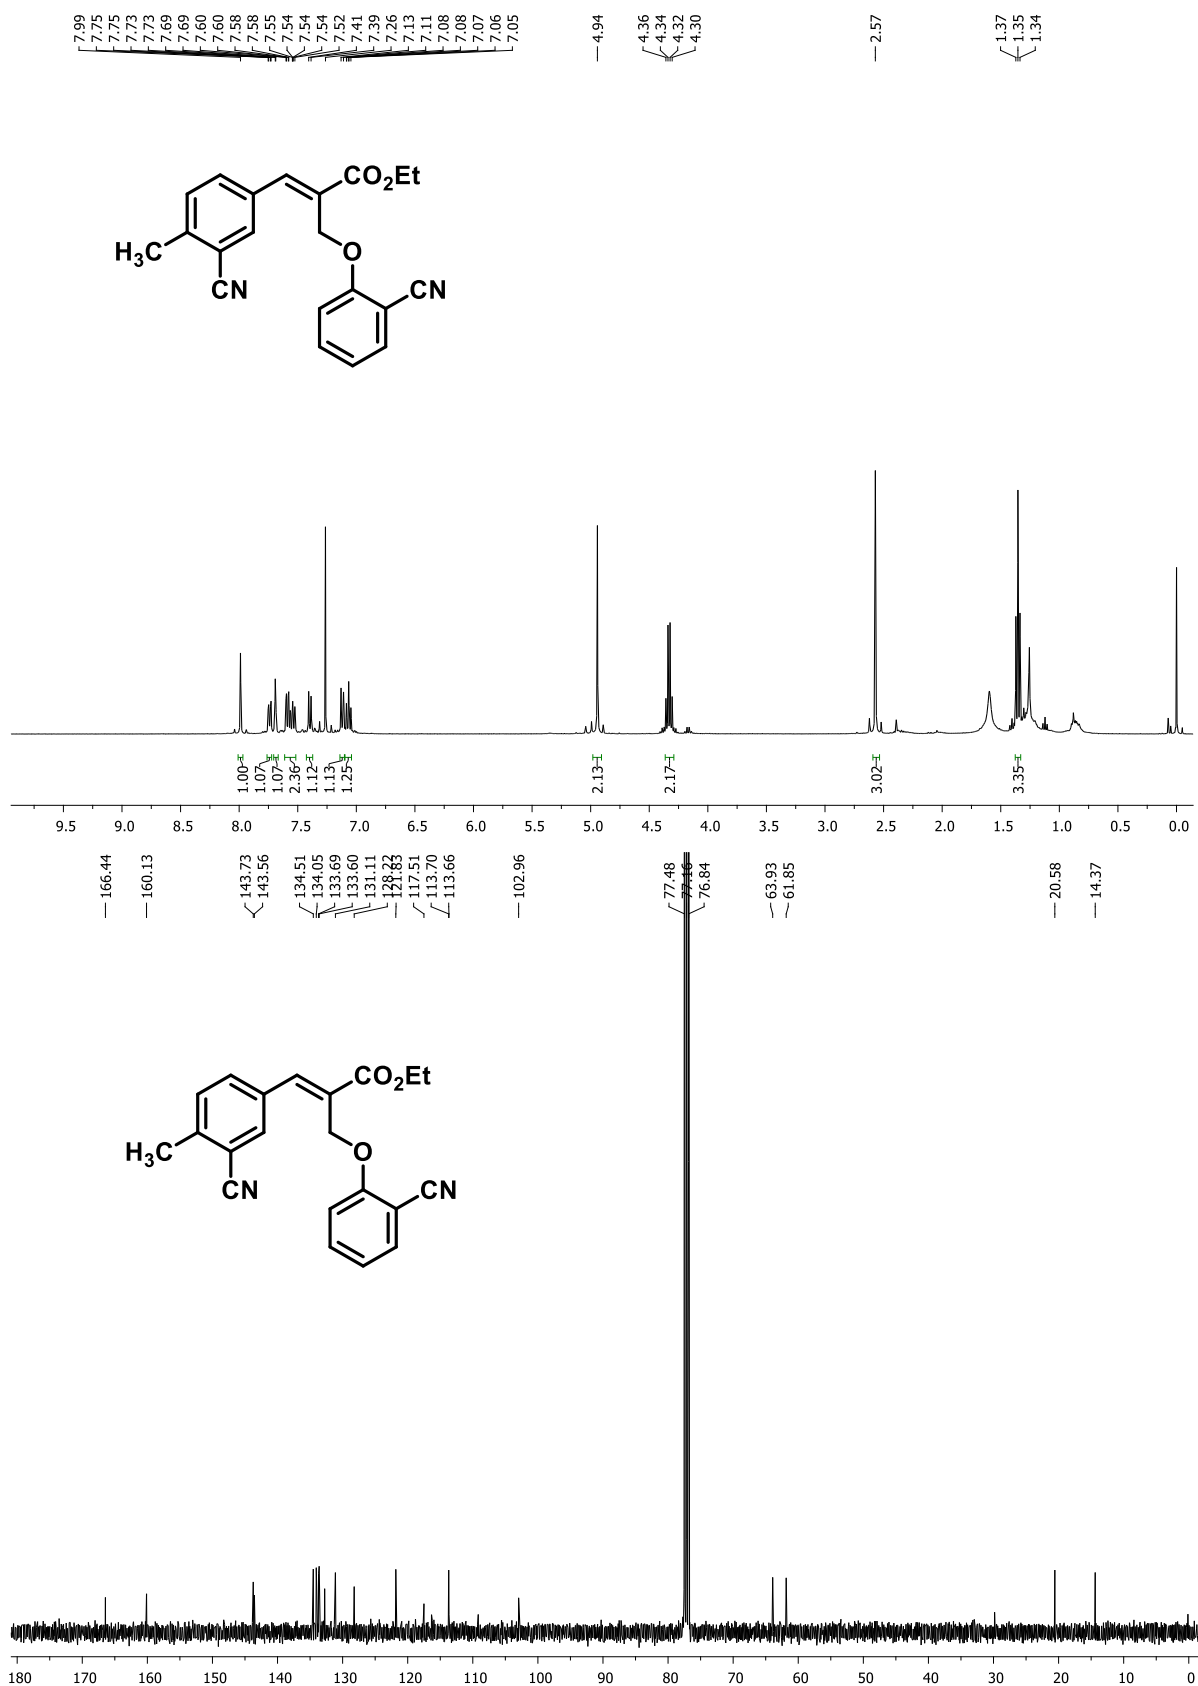

Methyl acrylate (16) (Z)-2-(bromomethyl)-3-(5-(E)-3-((2-ethylhexyl)oxy)-3-oxoprop-1-en-1-yl)-2-methoxyphenyl

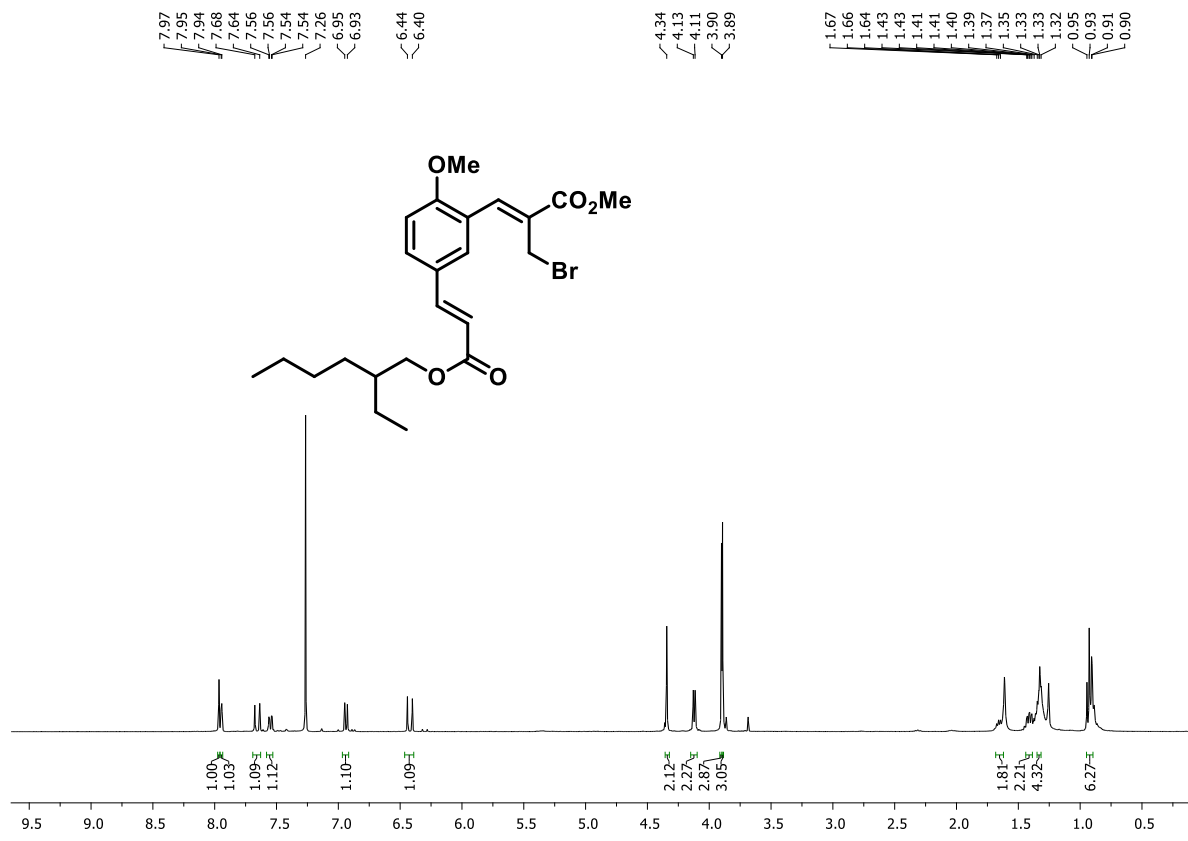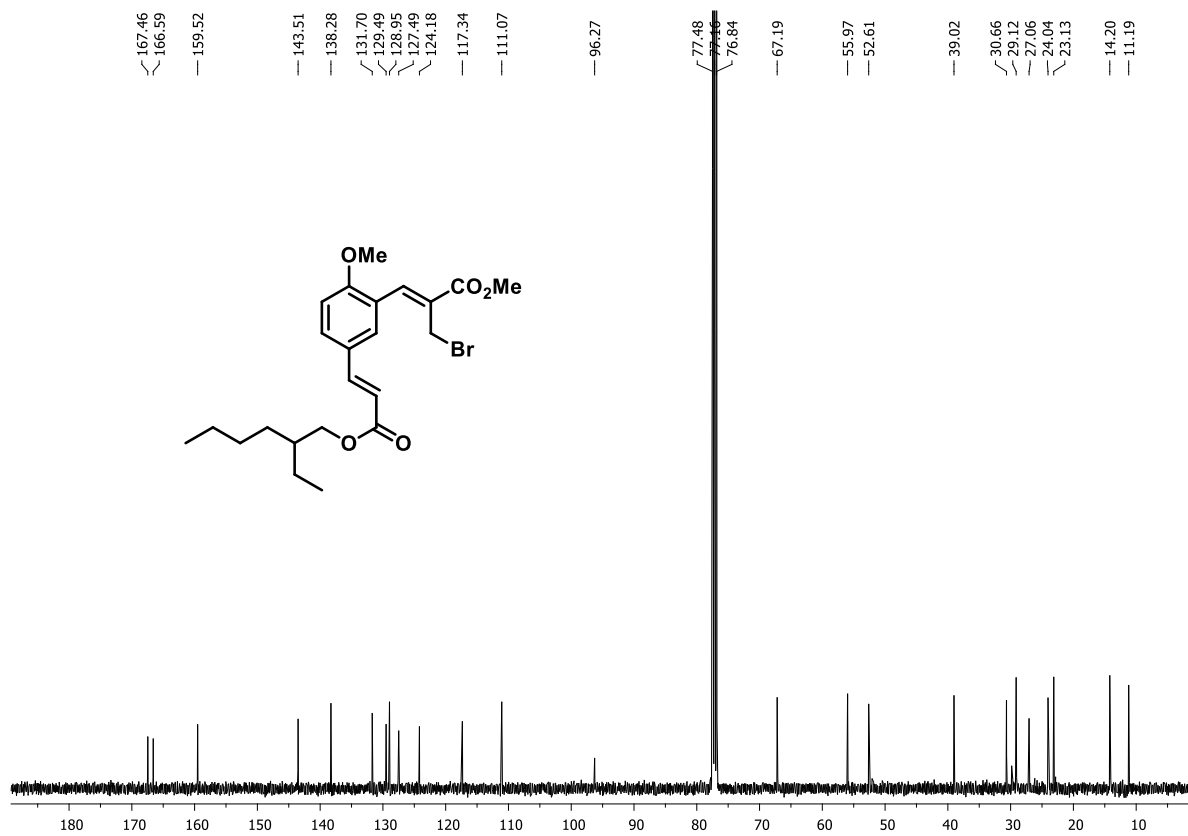

**Methyl (E)-3-(5-((E)-3-((2-ethylhexyl)oxy)-3-oxoprop-1-en-1-yl)-2-methoxyphenyl)-2-(pyrrolidin-1-ylmethyl)acrylate (17)**

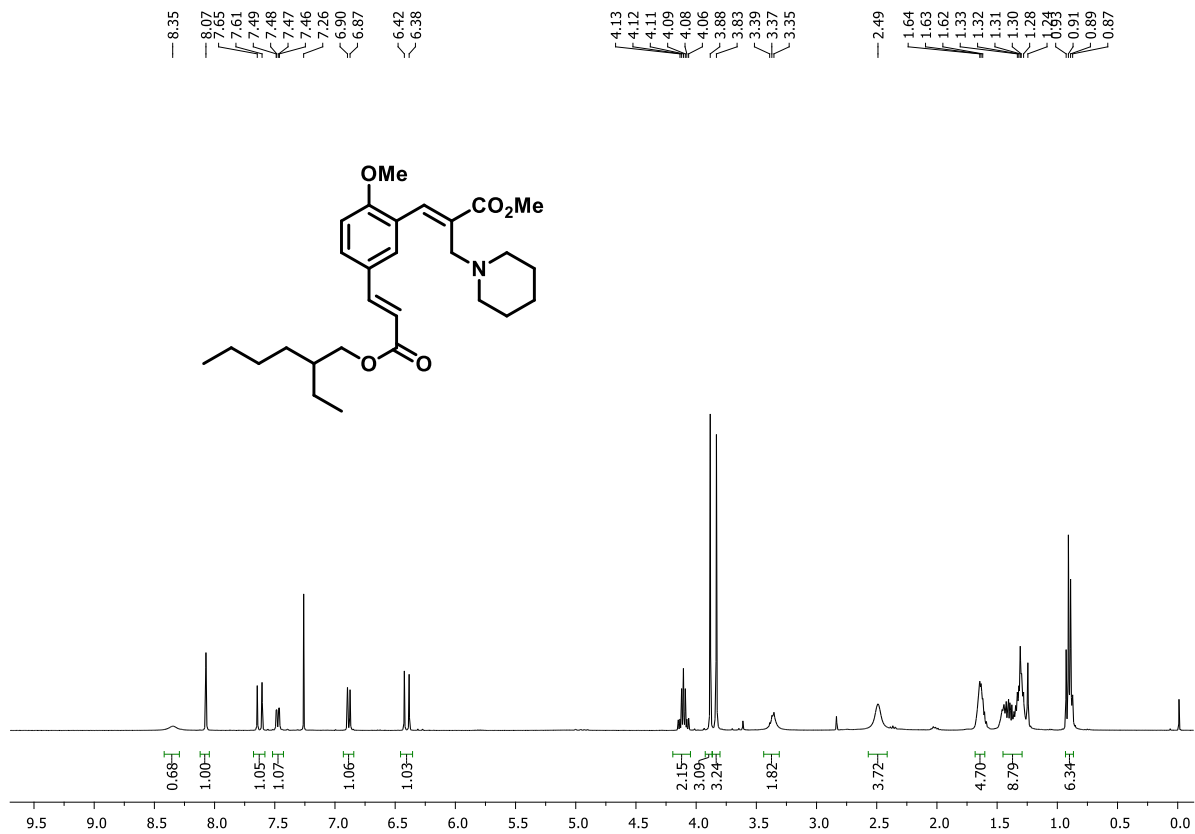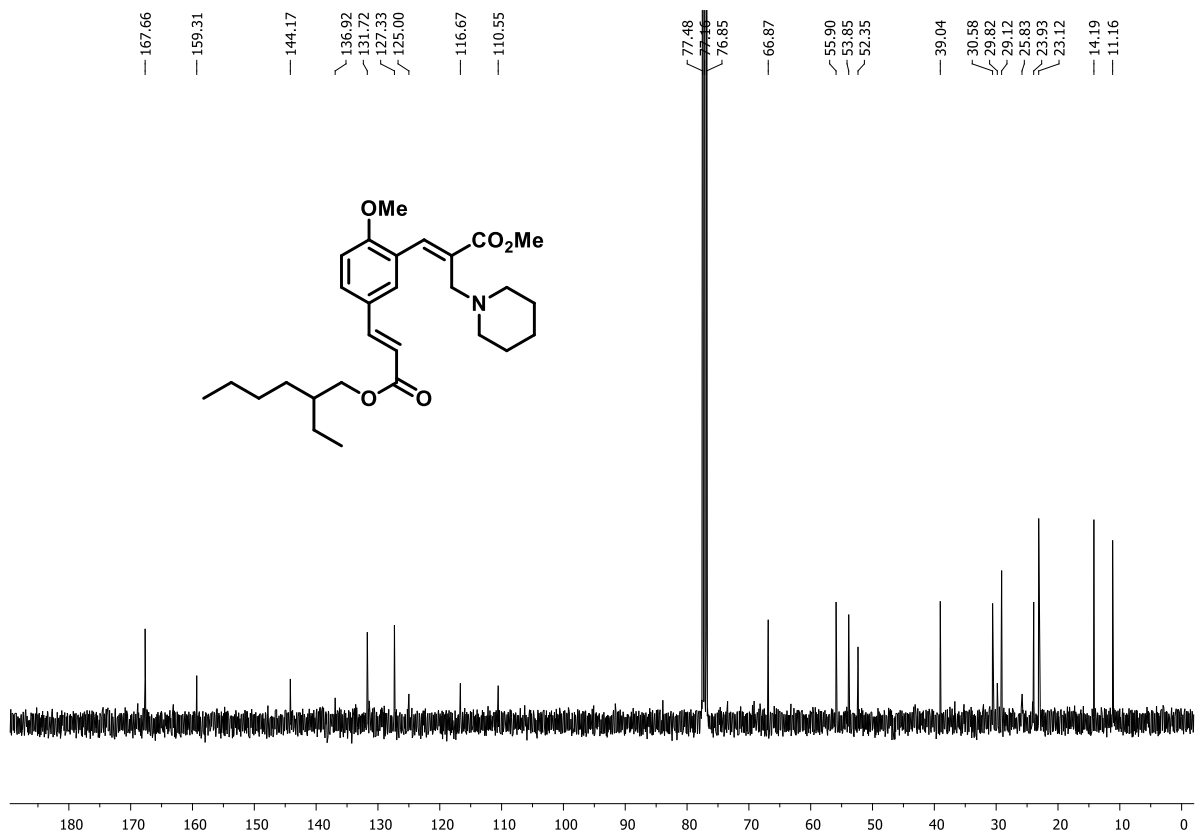

Dimethyl 3,3'-(5-(2-((2-cyanophenoxy)methyl)-3-methoxy-3-oxopropyl)-1,3-phenylene) (2E,2'E)-diacrylate (19)

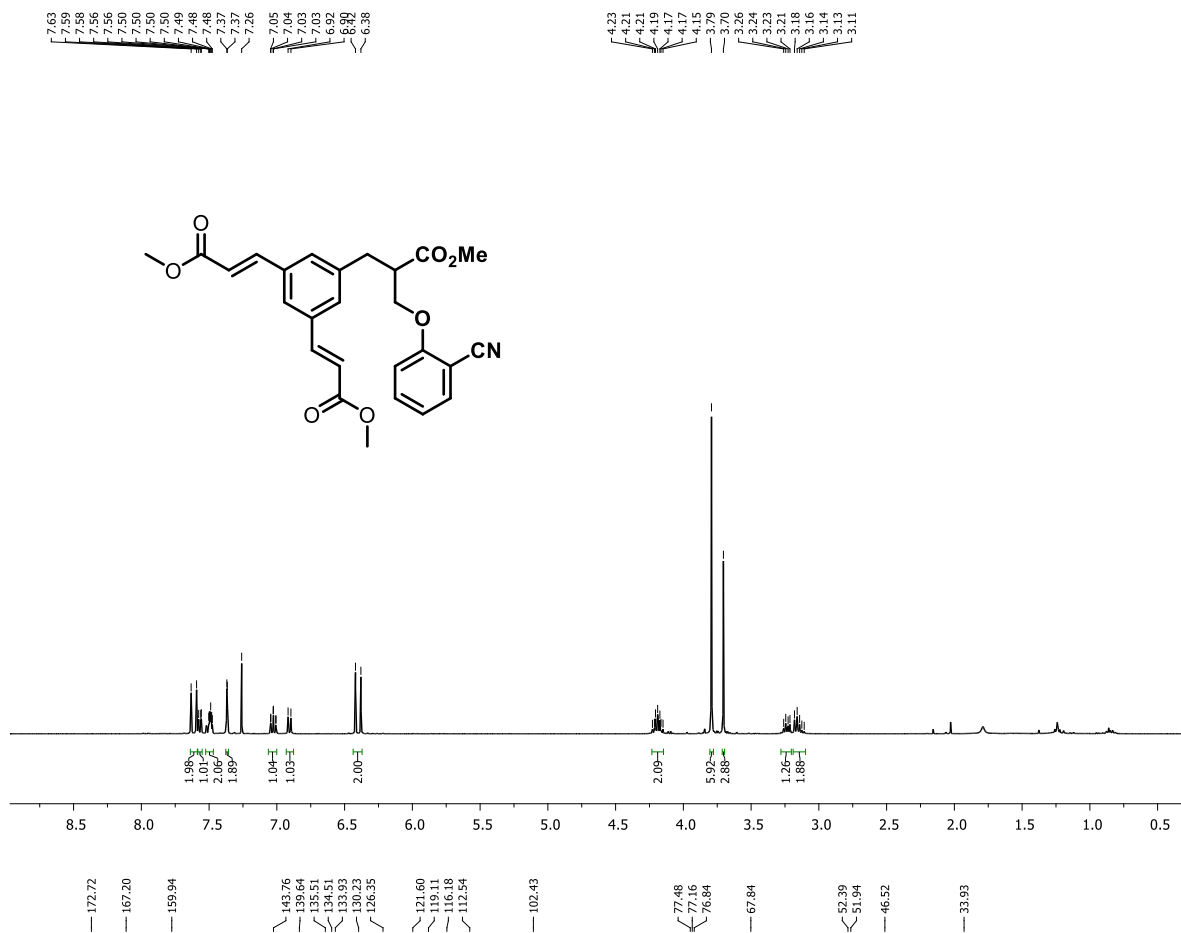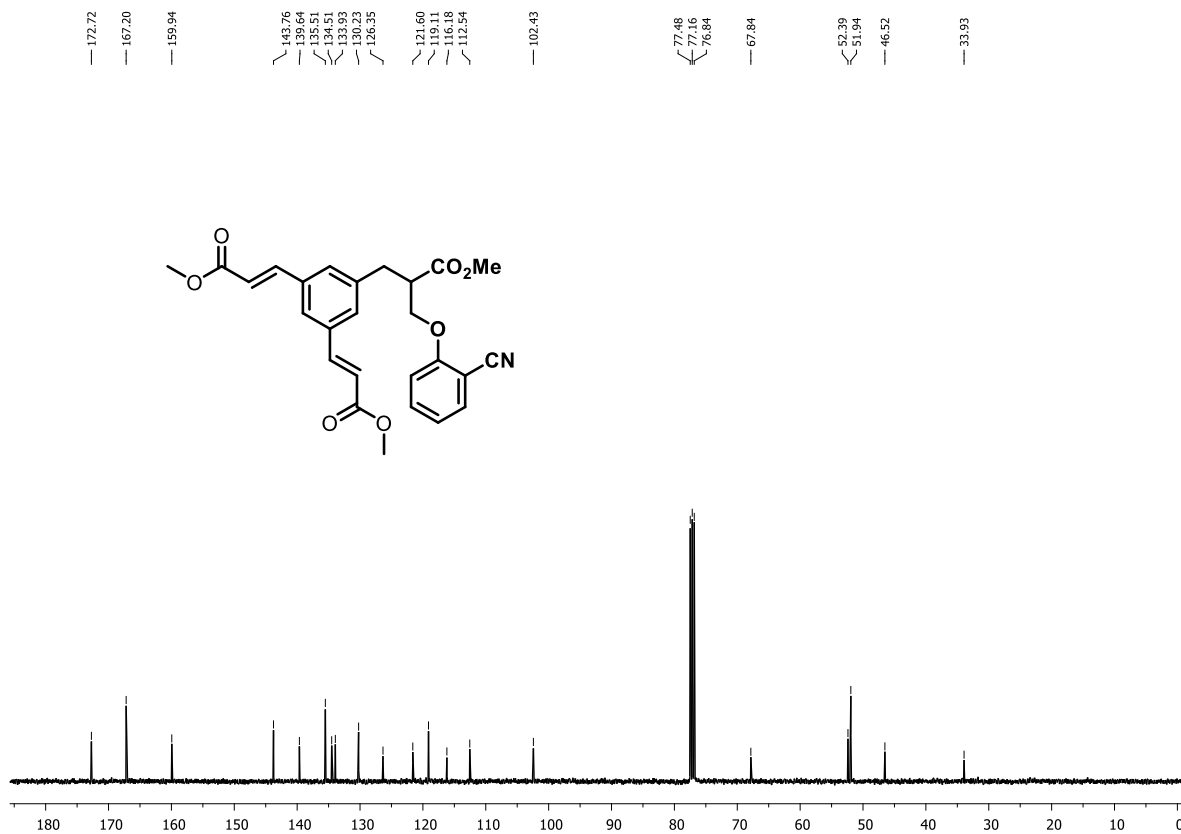

Supplement: d2sc06206b1.pdf [file d2sc06206b1.pdf]
